# Supplementary material for: Dissociation of impulsive traits by subthalamic metabotropic glutamate receptor 4
Source: eLife journal article supplement (doi:10.7554/elife.62123), 2022-01-04

**A<sub>i</sub>**

Injections

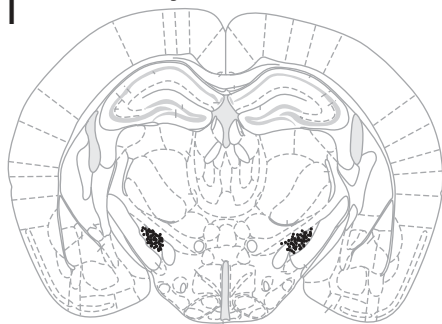**ii**

Implantations

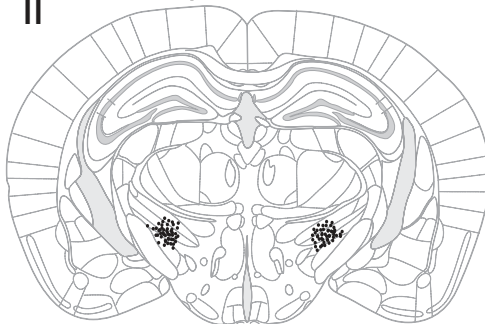**B<sub>i</sub>**

AAV::GFP

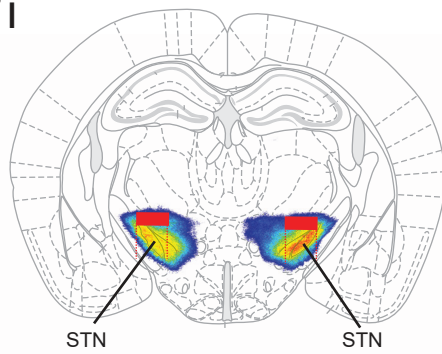

AAV::Chr2

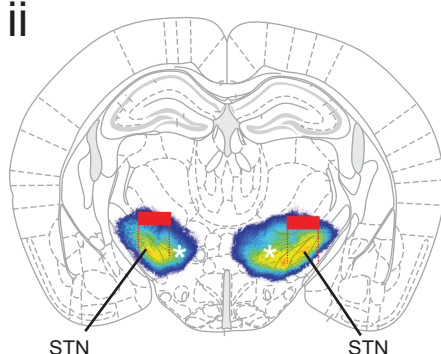

AAV::Arch

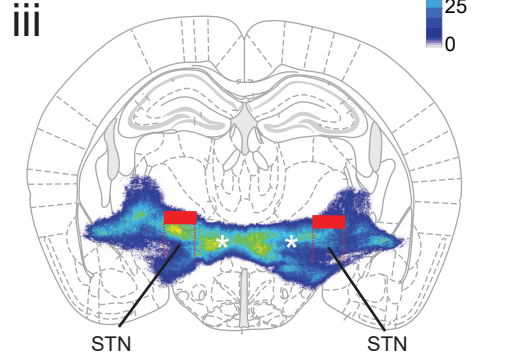

Injection site

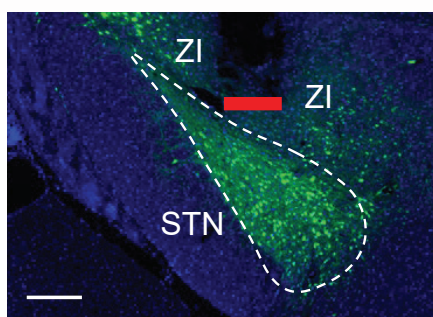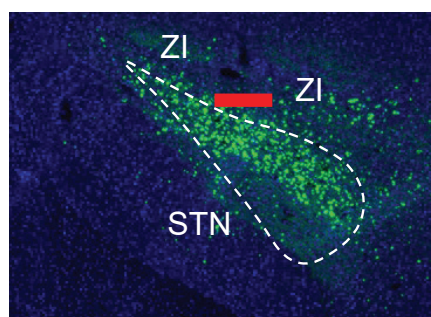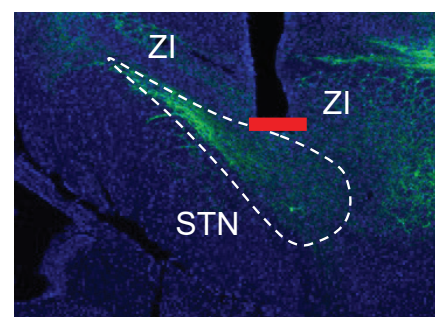

Projection

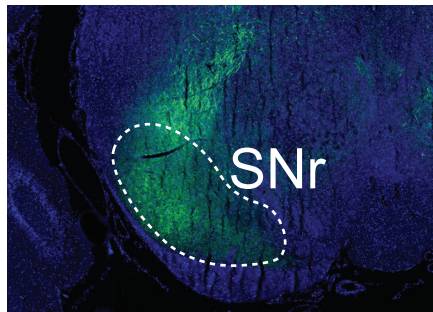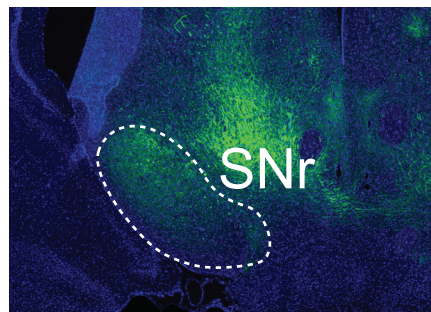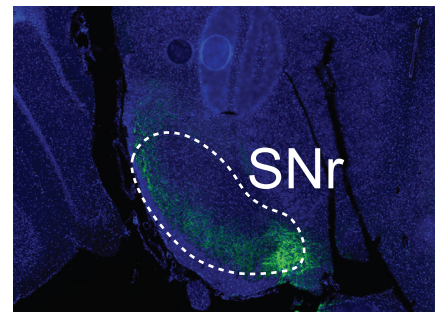

Injection site

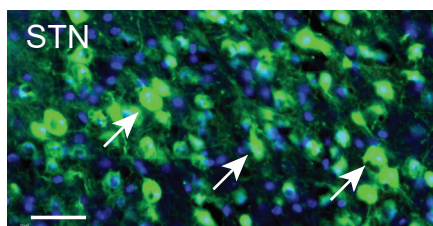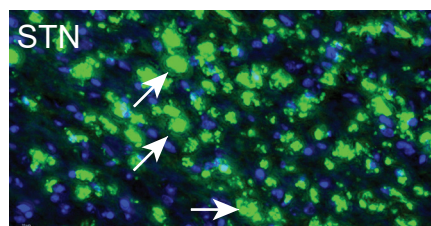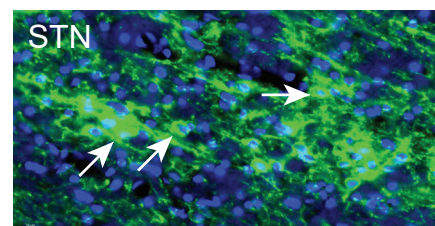

Projections

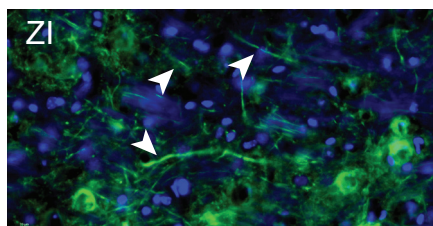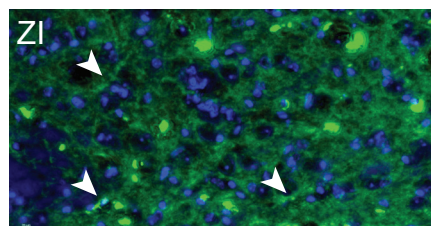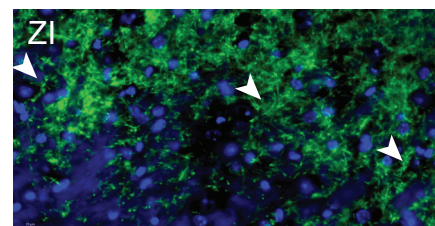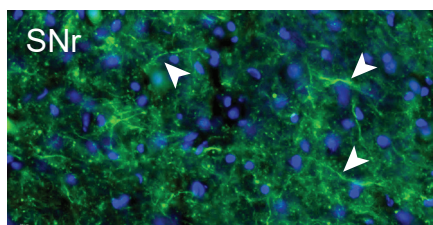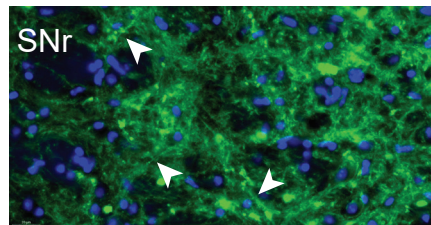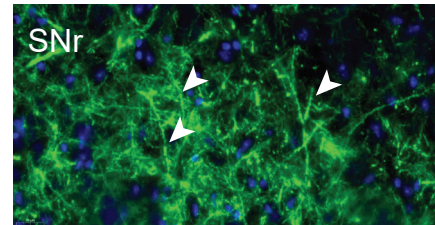

Supplement: supp [file elife-62123-supp-v1.zip]
