# Supplementary material for: Dissociation of impulsive traits by subthalamic metabotropic glutamate receptor 4
Source: eLife. 2022 Jan 4;11:e62123. doi: 10.7554/eLife.62123 (PMC8803315; doi:10.7554/eLife.62123)
Supplement: Figure 1—figure supplement 1—source data 1. [file elife-62123-fig1-figsupp1-data1.xlsx]

## Sheet: Fig1 - Fig Suppl 1A
High impulsive (HI)
Precue Response rate	%Ng trials with FA
0.0370073	31.0026
0.0476587	25.5523
0.0566621	46.6682
0.0465862	32.4415
0.0209249	33.8291
Low impulsive (LI)
Precue Response rate	%Ng trials with FA
0.0167012	21.6582
0.0248985	21.4665
0.0234152	11.1213
0.0175622	14.7126
0.0188159	14.9817

## Sheet: Fig1 - Fig Suppl 1B
Go				FA
Latency to poke (s)	Cummulative % of trials			Latency to poke (s)	Cummulative % of trials
	HI	LI			HI	LI
0	1.5625	0.714286		0	10.8696	3.44828
1	22.6562	21.4286		1	21.7391	20.6897
2	59.375	72.8571		2	28.2609	34.4828
3	82.0312	90		3	36.9565	41.3793
4	88.2812	92.1429		4	47.8261	48.2759
5	92.9688	96.4286		5	58.6957	55.1724
6	96.875	97.8571		6	60.8696	65.5172
7	99.2188	99.2857		7	73.913	72.4138
8	100	100		8	82.6087	79.3103
9	100	100		9	91.3043	89.6552
10	100	100		10	100	100

## Sheet: Fig1 - Fig Suppl 1C,D
Fig1 - Fig Suppl 1C: Licks during Reward/ITI					Fig1 - Fig Suppl 1D i: Distance traveled (m)					Fig1 - Fig Suppl 1D ii: Licks during Reward/ITI
HI	LI				HD	LD				HL	LL
63.3333	68.3333				7.26983	7.57111				73.6667	63.3333
56.3333	67				8.50412	6.82108				97	56.3333
73.6667	84.3333				7.96579	6.72534				84.3333	70.6667
97	71.6667				7.23121	5.74795				71.6667	68.3333
70.6667	118.667				8.68001	5.42668				118.667	67
