# Supplementary material for: Dissociation of impulsive traits by subthalamic metabotropic glutamate receptor 4
Source: eLife. 2022 Jan 4;11:e62123. doi: 10.7554/eLife.62123 (PMC8803315; doi:10.7554/eLife.62123)
Supplement: Figure 1—figure supplement 2—source data 1. [file elife-62123-fig1-figsupp2-data1.xlsx]

## Sheet: Fig1 - Fig Suppl 2C
Fig1 - Fig Suppl 2C i					Fig1 - Fig Suppl 2C ii					Fig1 - Fig Suppl 2C iii
Node	Edge	Delta Correlation	Delta Fisher Z		Node	Edge	Delta Correlation	Delta Fisher Z		Node	Edge	Delta Correlation	Delta Fisher Z
ACA	ACA L - ACA R	0.0285653	0.196924		ACA	ACA L - ACA R	-0.0655198	-0.348611		ACA	ACA L - ACA R	0.007588	0.0846972
ACA	ACA L - ACB L	-0.00804834	-0.00202725		ACA	ACA L - ACB L	0.0584345	0.0555468		ACA	ACA L - ACB L	-0.0349906	-0.0320989
ACA	ACA L - ACB R	0.131322	0.182076		ACA	ACA L - ACB R	-0.0906657	-0.13523		ACA	ACA L - ACB R	0.0483249	0.0909889
ACA	ACA L - AI L	-0.0424469	-0.0494804		ACA	ACA L - AI L	-0.134556	-0.139988		ACA	ACA L - AI L	-0.0483728	-0.0539435
ACA	ACA L - AI R	0.169603	0.224295		ACA	ACA L - AI R	-0.174123	-0.230698		ACA	ACA L - AI R	-0.0574693	-0.0155987
ACA	ACA L - AMY L	-0.0563029	-0.0566664		ACA	ACA L - AMY L	0.00119045	0.00117517		ACA	ACA L - AMY L	-0.0713485	-0.0717077
ACA	ACA L - AMY R	0.156264	0.171749		ACA	ACA L - AMY R	-0.167106	-0.183377		ACA	ACA L - AMY R	-0.14045	-0.15528
ACA	ACA L - CB L	0.122545	0.124933		ACA	ACA L - CB L	-0.0924793	-0.0942034		ACA	ACA L - CB L	0.087364	0.0892803
ACA	ACA L - CB R	0.0274265	0.0284025		ACA	ACA L - CB R	-0.000180478	0.00197525		ACA	ACA L - CB R	0.041591	0.0412455
ACA	ACA L - COA L	0.0821456	0.0867908		ACA	ACA L - COA L	-0.230136	-0.235958		ACA	ACA L - COA L	-0.0405411	-0.0442675
ACA	ACA L - COA R	0.0913285	0.113809		ACA	ACA L - COA R	-0.143084	-0.166166		ACA	ACA L - COA R	-0.0889186	-0.111343
ACA	ACA L - CP L	-0.166528	-0.181868		ACA	ACA L - CP L	-0.0710418	-0.0698164		ACA	ACA L - CP L	-0.0319842	-0.0435939
ACA	ACA L - CP R	0.26121	0.285637		ACA	ACA L - CP R	-0.128979	-0.15019		ACA	ACA L - CP R	-0.154677	-0.143176
ACA	ACA L - CSm L	0.181366	0.189342		ACA	ACA L - CSm L	0.145942	0.144632		ACA	ACA L - CSm L	-0.160968	-0.166226
ACA	ACA L - CSm R	0.146751	0.152804		ACA	ACA L - CSm R	0.115717	0.115107		ACA	ACA L - CSm R	-0.11979	-0.122924
ACA	ACA L - ECT L	-0.12554	-0.134345		ACA	ACA L - ECT L	0.078654	0.085371		ACA	ACA L - ECT L	0.147607	0.156998
ACA	ACA L - ECT R	-0.0380169	-0.0402709		ACA	ACA L - ECT R	0.0511958	0.0536951		ACA	ACA L - ECT R	-0.049075	-0.0515281
ACA	ACA L - ENT L	0.0114347	0.0122042		ACA	ACA L - ENT L	-0.0554638	-0.0568242		ACA	ACA L - ENT L	0.0552413	0.0566186
ACA	ACA L - ENT R	-0.0358731	-0.0361613		ACA	ACA L - ENT R	-0.0301161	-0.0299033		ACA	ACA L - ENT R	-0.0161149	-0.016475
ACA	ACA L - FS L	0.0511242	0.0483919		ACA	ACA L - FS L	0.108008	0.11605		ACA	ACA L - FS L	-0.225448	-0.234544
ACA	ACA L - FS R	0.111818	0.122567		ACA	ACA L - FS R	-0.0619192	-0.0704102		ACA	ACA L - FS R	0.0637999	0.0712184
ACA	ACA L - HIP L	-0.134727	-0.138961		ACA	ACA L - HIP L	0.17839	0.184486		ACA	ACA L - HIP L	0.204101	0.210235
ACA	ACA L - HIP R	-0.082418	-0.0842306		ACA	ACA L - HIP R	0.0408818	0.0407147		ACA	ACA L - HIP R	-0.0399681	-0.0388212
ACA	ACA L - HT L	-0.00444101	-0.00523252		ACA	ACA L - HT L	-0.0663553	-0.0681973		ACA	ACA L - HT L	-0.0575221	-0.0593618
ACA	ACA L - HT R	0.116368	0.121459		ACA	ACA L - HT R	-0.116351	-0.121807		ACA	ACA L - HT R	-0.0767729	-0.0794361
ACA	ACA L - IC L	0.12762	0.129244		ACA	ACA L - IC L	0.0537624	0.0551621		ACA	ACA L - IC L	-2.60306e-05	-0.000833798
ACA	ACA L - IC R	-0.0246706	-0.0241437		ACA	ACA L - IC R	-0.009907	-0.010419		ACA	ACA L - IC R	0.0242836	0.025088
ACA	ACA L - ILA L	0.0117735	0.0431528		ACA	ACA L - ILA L	-0.115055	-0.198915		ACA	ACA L - ILA L	0.0422808	0.0836903
ACA	ACA L - ILA R	0.0235206	0.0700009		ACA	ACA L - ILA R	-0.129743	-0.210721		ACA	ACA L - ILA R	0.0347572	0.0786757
ACA	ACA L - LSX L	-0.0354149	-0.0302532		ACA	ACA L - LSX L	0.020927	0.0145325		ACA	ACA L - LSX L	-0.0217983	-0.0227136
ACA	ACA L - LSX R	0.0695388	0.0944251		ACA	ACA L - LSX R	-0.114978	-0.145474		ACA	ACA L - LSX R	-0.0110259	0.00817468
ACA	ACA L - MB R	0.0603758	0.0615221		ACA	ACA L - MB R	0.0587389	0.0589545		ACA	ACA L - MB R	-0.0591134	-0.0595932
ACA	ACA L - MOB R	-0.0685274	-0.07845		ACA	ACA L - MOB R	0.0258885	0.0300922		ACA	ACA L - MOB R	-0.0212848	-0.0282315
ACA	ACA L - MRN L	0.166907	0.176437		ACA	ACA L - MRN L	0.208076	0.225521		ACA	ACA L - MRN L	0.0178911	0.0323825
ACA	ACA L - MRN R	0.0835957	0.0881896		ACA	ACA L - MRN R	0.0803405	0.0815404		ACA	ACA L - MRN R	-0.0521777	-0.0530836
ACA	ACA L - MY L	-0.0253519	-0.025719		ACA	ACA L - MY L	0.0974639	0.0981115		ACA	ACA L - MY L	0.0139952	0.0142109
ACA	ACA L - MY R	-0.00441059	-0.00451973		ACA	ACA L - MY R	0.0718328	0.0724145		ACA	ACA L - MY R	0.0196666	0.0196626
ACA	ACA L - NBM L	-0.109626	-0.11123		ACA	ACA L - NBM L	0.00465318	0.00385638		ACA	ACA L - NBM L	-0.0420785	-0.0434814
ACA	ACA L - NBM R	0.141738	0.152729		ACA	ACA L - NBM R	-0.112039	-0.12296		ACA	ACA L - NBM R	-0.0151474	-0.0120868
ACA	ACA L - OLF L	0.0507589	0.0555232		ACA	ACA L - OLF L	-0.16955	-0.177879		ACA	ACA L - OLF L	0.000654911	0.00381594
ACA	ACA L - OLF R	0.119502	0.140367		ACA	ACA L - OLF R	-0.186748	-0.212091		ACA	ACA L - OLF R	-0.0703342	-0.0761611
ACA	ACA L - ORB L	-0.0451079	-0.0187958		ACA	ACA L - ORB L	-0.148889	-0.235348		ACA	ACA L - ORB L	0.0890881	0.148744
ACA	ACA L - ORB R	0.0255759	0.0737907		ACA	ACA L - ORB R	-0.127114	-0.200446		ACA	ACA L - ORB R	0.0419381	0.0917548
ACA	ACA L - OT L	-0.0185591	-0.0178497		ACA	ACA L - OT L	0.118721	0.120999		ACA	ACA L - OT L	0.00183207	0.00042261
ACA	ACA L - OT R	0.0323793	0.0477332		ACA	ACA L - OT R	-0.00223252	-0.013703		ACA	ACA L - OT R	0.122706	0.135864
ACA	ACA L - PAG L	0.238848	0.257023		ACA	ACA L - PAG L	0.178223	0.196806		ACA	ACA L - PAG L	-0.0495102	-0.0373437
ACA	ACA L - PAG R	0.186455	0.199797		ACA	ACA L - PAG R	0.13067	0.146447		ACA	ACA L - PAG R	-0.0140799	-0.00317037
ACA	ACA L - PALc L	-0.173044	-0.18028		ACA	ACA L - PALc L	0.0532711	0.0566027		ACA	ACA L - PALc L	-0.127892	-0.134808
ACA	ACA L - PALc R	0.0719227	0.0727829		ACA	ACA L - PALc R	0.0198986	0.0208269		ACA	ACA L - PALc R	-0.0237218	-0.0246292
ACA	ACA L - PALd L	-0.266221	-0.276252		ACA	ACA L - PALd L	0.0586195	0.0657826		ACA	ACA L - PALd L	0.00171477	0.0015956
ACA	ACA L - PALd R	0.245662	0.252232		ACA	ACA L - PALd R	-0.0427519	-0.0452299		ACA	ACA L - PALd R	-0.339604	-0.353289
ACA	ACA L - PALm L	0.00364722	0.00575618		ACA	ACA L - PALm L	0.037285	0.0404909		ACA	ACA L - PALm L	-0.0378734	-0.0411063
ACA	ACA L - PALm R	0.0704038	0.0859451		ACA	ACA L - PALm R	4.13991e-05	-0.0101499		ACA	ACA L - PALm R	0.053285	0.0650229
ACA	ACA L - PALv L	-0.0233113	-0.026503		ACA	ACA L - PALv L	0.100362	0.104887		ACA	ACA L - PALv L	-0.104788	-0.109423
ACA	ACA L - PALv R	0.135753	0.155359		ACA	ACA L - PALv R	-0.0794476	-0.0970372		ACA	ACA L - PALv R	0.0346169	0.0524878
ACA	ACA L - PB L	0.194135	0.206083		ACA	ACA L - PB L	0.0607738	0.0654401		ACA	ACA L - PB L	-0.00895658	-0.0065796
ACA	ACA L - PB R	0.0778229	0.0803183		ACA	ACA L - PB R	0.107159	0.107672		ACA	ACA L - PB R	-0.0970356	-0.0980399
ACA	ACA L - PERI L	-0.0688946	-0.0698055		ACA	ACA L - PERI L	0.0447643	0.0456111		ACA	ACA L - PERI L	0.00557902	0.005769
ACA	ACA L - PERI R	0.0309427	0.0308524		ACA	ACA L - PERI R	0.0184798	0.018863		ACA	ACA L - PERI R	-0.100497	-0.101098
ACA	ACA L - PIR L	-0.00218695	-0.00408295		ACA	ACA L - PIR L	-0.152874	-0.158531		ACA	ACA L - PIR L	-0.0748809	-0.0781458
ACA	ACA L - PIR R	0.214532	0.265921		ACA	ACA L - PIR R	-0.190531	-0.241408		ACA	ACA L - PIR R	0.00599171	0.0453179
ACA	ACA L - PL L	0.0151741	0.0839766		ACA	ACA L - PL L	-0.0939309	-0.244725		ACA	ACA L - PL L	0.0408572	0.114833
ACA	ACA L - PL R	0.0606487	0.169254		ACA	ACA L - PL R	-0.114735	-0.257781		ACA	ACA L - PL R	0.020018	0.0866506
ACA	ACA L - PRNr L	0.158525	0.167345		ACA	ACA L - PRNr L	0.0976289	0.0939605		ACA	ACA L - PRNr L	-0.101186	-0.108655
ACA	ACA L - PRNr R	0.0281912	0.0280587		ACA	ACA L - PRNr R	0.0950797	0.0960733		ACA	ACA L - PRNr R	-0.0794187	-0.0805857
ACA	ACA L - PTLp L	-0.197025	-0.209508		ACA	ACA L - PTLp L	0.140209	0.150669		ACA	ACA L - PTLp L	0.0586945	0.0677056
ACA	ACA L - PTLp R	-0.255764	-0.263129		ACA	ACA L - PTLp R	0.163341	0.169504		ACA	ACA L - PTLp R	-0.113022	-0.120248
ACA	ACA L - RHP L	-0.0435058	-0.0450295		ACA	ACA L - RHP L	0.171717	0.174921		ACA	ACA L - RHP L	0.126553	0.12972
ACA	ACA L - RHP R	-0.0560444	-0.057136		ACA	ACA L - RHP R	0.00669949	0.00713357		ACA	ACA L - RHP R	0.0731124	0.0735
ACA	ACA L - RSP L	-0.0901663	-0.0946081		ACA	ACA L - RSP L	0.146316	0.155707		ACA	ACA L - RSP L	0.0729465	0.0802779
ACA	ACA L - RSP R	-0.127823	-0.131509		ACA	ACA L - RSP R	0.159263	0.163307		ACA	ACA L - RSP R	-0.0193235	-0.0192274
ACA	ACA L - SC L	0.0398902	0.0475852		ACA	ACA L - SC L	0.268452	0.281563		ACA	ACA L - SC L	0.0471775	0.0550634
ACA	ACA L - SC R	0.0369896	0.0380709		ACA	ACA L - SC R	0.122666	0.126816		ACA	ACA L - SC R	-0.0062334	-0.0054872
ACA	ACA L - SN L	0.129045	0.130332		ACA	ACA L - SN L	0.0591841	0.05891		ACA	ACA L - SN L	-0.0181978	-0.0183116
ACA	ACA L - SN R	0.034411	0.0354368		ACA	ACA L - SN R	-0.0546441	-0.0564052		ACA	ACA L - SN R	-0.121162	-0.123206
ACA	ACA L - STN L	0.0492488	0.0486835		ACA	ACA L - STN L	-0.0630807	-0.0647737		ACA	ACA L - STN L	-0.149249	-0.151399
ACA	ACA L - STN R	-0.017621	-0.0168341		ACA	ACA L - STN R	-0.0779907	-0.0793259		ACA	ACA L - STN R	-0.0917327	-0.0939121
ACA	ACA L - TEa L	-0.141303	-0.146556		ACA	ACA L - TEa L	0.09481	0.0992133		ACA	ACA L - TEa L	0.108619	0.114015
ACA	ACA L - TEa R	-0.0415695	-0.044955		ACA	ACA L - TEa R	0.038937	0.0423311		ACA	ACA L - TEa R	-0.0437718	-0.047169
ACA	ACA L - TH L	-0.0770846	-0.104077		ACA	ACA L - TH L	0.262321	0.292992		ACA	ACA L - TH L	0.0376502	0.0556334
ACA	ACA L - TH R	-0.0631899	-0.0674974		ACA	ACA L - TH R	0.22435	0.236665		ACA	ACA L - TH R	-0.0387542	-0.039665
ACA	ACA L - VTA L	0.0429809	0.0440731		ACA	ACA L - VTA L	0.00599988	0.00582598		ACA	ACA L - VTA L	-0.0444251	-0.0455853
ACA	ACA L - VTA R	0.0615003	0.0626865		ACA	ACA L - VTA R	0.023834	0.0227487		ACA	ACA L - VTA R	-0.130345	-0.133576
ACA	ACA L - ZI L	0.0172864	0.0180101		ACA	ACA L - ZI L	-0.0385201	-0.0393474		ACA	ACA L - ZI L	-0.107169	-0.108944
ACA	ACA L - ZI R	-0.00254834	-0.00245781		ACA	ACA L - ZI R	-0.0219417	-0.022946		ACA	ACA L - ZI R	-0.0704479	-0.0708478
ACA	ACA R - ACB L	-0.0235597	-0.019076		ACA	ACA R - ACB L	0.0206665	0.0175671		ACA	ACA R - ACB L	-0.0778926	-0.0780342
ACA	ACA R - ACB R	0.164486	0.213655		ACA	ACA R - ACB R	-0.0646075	-0.096616		ACA	ACA R - ACB R	-0.0124201	0.0138823
ACA	ACA R - AI L	0.0015221	-0.000931993		ACA	ACA R - AI L	-0.164066	-0.169327		ACA	ACA R - AI L	-0.0841555	-0.0870952
ACA	ACA R - AI R	0.21313	0.277917		ACA	ACA R - AI R	-0.193795	-0.265729		ACA	ACA R - AI R	-0.102126	-0.0713641
ACA	ACA R - AMY L	-0.0485552	-0.0496103		ACA	ACA R - AMY L	-0.0368424	-0.0377349		ACA	ACA R - AMY L	-0.106813	-0.108042
ACA	ACA R - AMY R	0.151334	0.165509		ACA	ACA R - AMY R	-0.224429	-0.241024		ACA	ACA R - AMY R	-0.102722	-0.117233
ACA	ACA R - CB L	0.0831404	0.0845063		ACA	ACA R - CB L	-0.0947153	-0.0963643		ACA	ACA R - CB L	0.102854	0.104042
ACA	ACA R - CB R	0.08484	0.0864671		ACA	ACA R - CB R	0.0252325	0.0269733		ACA	ACA R - CB R	0.0129874	0.0119346
ACA	ACA R - COA L	0.0157888	0.0149061		ACA	ACA R - COA L	-0.170372	-0.172995		ACA	ACA R - COA L	-0.079413	-0.0811261
ACA	ACA R - COA R	0.0842801	0.0980584		ACA	ACA R - COA R	-0.16668	-0.182847		ACA	ACA R - COA R	-0.0599604	-0.0740198
ACA	ACA R - CP L	-0.148778	-0.155188		ACA	ACA R - CP L	-0.126359	-0.12805		ACA	ACA R - CP L	-0.0574159	-0.063874
ACA	ACA R - CP R	0.303805	0.349895		ACA	ACA R - CP R	-0.106735	-0.136747		ACA	ACA R - CP R	-0.149541	-0.13575
ACA	ACA R - CSm L	0.141284	0.146952		ACA	ACA R - CSm L	0.0723474	0.0699133		ACA	ACA R - CSm L	-0.124752	-0.129517
ACA	ACA R - CSm R	0.130436	0.136382		ACA	ACA R - CSm R	0.0415535	0.0383076		ACA	ACA R - CSm R	-0.0991024	-0.103624
ACA	ACA R - ECT L	-0.0970256	-0.104729		ACA	ACA R - ECT L	0.0799811	0.0846298		ACA	ACA R - ECT L	0.141415	0.150251
ACA	ACA R - ECT R	-0.00300749	-0.00284583		ACA	ACA R - ECT R	-0.0397886	-0.0401577		ACA	ACA R - ECT R	-0.0442655	-0.0448695
ACA	ACA R - ENT L	-0.0116542	-0.0115087		ACA	ACA R - ENT L	-0.0439983	-0.0448355		ACA	ACA R - ENT L	0.0374443	0.0383446
ACA	ACA R - ENT R	-0.0436716	-0.0435082		ACA	ACA R - ENT R	0.0390287	0.040417		ACA	ACA R - ENT R	-0.0433281	-0.044074
ACA	ACA R - FS L	0.00193997	-0.000938064		ACA	ACA R - FS L	0.0871651	0.0944085		ACA	ACA R - FS L	-0.246131	-0.255826
ACA	ACA R - FS R	0.175278	0.187398		ACA	ACA R - FS R	-0.119876	-0.129997		ACA	ACA R - FS R	0.0283902	0.0343329
ACA	ACA R - HIP L	-0.143165	-0.146767		ACA	ACA R - HIP L	0.163294	0.169727		ACA	ACA R - HIP L	0.228087	0.235276
ACA	ACA R - HIP R	-0.0712675	-0.0730975		ACA	ACA R - HIP R	0.0801512	0.0794476		ACA	ACA R - HIP R	-0.0648498	-0.0639382
ACA	ACA R - HT L	-0.00537254	-0.00863041		ACA	ACA R - HT L	-0.0615342	-0.0647923		ACA	ACA R - HT L	-0.105789	-0.109643
ACA	ACA R - HT R	0.132187	0.138407		ACA	ACA R - HT R	-0.145587	-0.153613		ACA	ACA R - HT R	-0.0956879	-0.0997592
ACA	ACA R - IC L	0.0404739	0.0411238		ACA	ACA R - IC L	0.0581248	0.0590112		ACA	ACA R - IC L	0.0265345	0.0264788
ACA	ACA R - IC R	0.0616664	0.0621761		ACA	ACA R - IC R	-0.00646739	-0.00689381		ACA	ACA R - IC R	-0.0110618	-0.0108004
ACA	ACA R - ILA L	0.0585336	0.108995		ACA	ACA R - ILA L	-0.156834	-0.241958		ACA	ACA R - ILA L	0.0185842	0.04587
ACA	ACA R - ILA R	0.0659469	0.145711		ACA	ACA R - ILA R	-0.105648	-0.207999		ACA	ACA R - ILA R	0.0133528	0.0502896
ACA	ACA R - LSX L	-0.0124536	-0.00485306		ACA	ACA R - LSX L	0.00508786	0.000119305		ACA	ACA R - LSX L	-0.0587244	-0.0618086
ACA	ACA R - LSX R	0.119082	0.153379		ACA	ACA R - LSX R	-0.0745357	-0.100147		ACA	ACA R - LSX R	-0.0638092	-0.0557875
ACA	ACA R - MB R	0.063044	0.0647348		ACA	ACA R - MB R	0.0593136	0.0591823		ACA	ACA R - MB R	-0.0343347	-0.0344522
ACA	ACA R - MOB R	-0.0341425	-0.0396975		ACA	ACA R - MOB R	0.000933162	-0.000358188		ACA	ACA R - MOB R	-0.00028531	-0.0014414
ACA	ACA R - MRN L	0.105714	0.114447		ACA	ACA R - MRN L	0.0970683	0.106588		ACA	ACA R - MRN L	0.0952789	0.106164
ACA	ACA R - MRN R	0.0948817	0.100329		ACA	ACA R - MRN R	0.0722506	0.0727054		ACA	ACA R - MRN R	-0.0200593	-0.0207944
ACA	ACA R - MY L	-0.0395653	-0.0402047		ACA	ACA R - MY L	0.107846	0.109286		ACA	ACA R - MY L	-0.0378156	-0.0385546
ACA	ACA R - MY R	-0.0155067	-0.0162597		ACA	ACA R - MY R	0.10047	0.102429		ACA	ACA R - MY R	-0.0315428	-0.0329026
ACA	ACA R - NBM L	-0.0941798	-0.0969641		ACA	ACA R - NBM L	0.0103146	0.00841546		ACA	ACA R - NBM L	-0.101522	-0.104956
ACA	ACA R - NBM R	0.161861	0.174446		ACA	ACA R - NBM R	-0.194035	-0.207348		ACA	ACA R - NBM R	-0.00474403	-0.000518376
ACA	ACA R - OLF L	0.0128328	0.01257		ACA	ACA R - OLF L	-0.152903	-0.163207		ACA	ACA R - OLF L	-0.0374977	-0.0403679
ACA	ACA R - OLF R	0.133246	0.152989		ACA	ACA R - OLF R	-0.205736	-0.234198		ACA	ACA R - OLF R	-0.0595553	-0.0650508
ACA	ACA R - ORB L	-0.00421842	0.0259551		ACA	ACA R - ORB L	-0.183151	-0.261106		ACA	ACA R - ORB L	0.0553174	0.0948576
ACA	ACA R - ORB R	0.078585	0.162035		ACA	ACA R - ORB R	-0.114569	-0.216071		ACA	ACA R - ORB R	0.0280338	0.0881594
ACA	ACA R - OT L	-0.0734193	-0.076328		ACA	ACA R - OT L	0.135339	0.143237		ACA	ACA R - OT L	-0.0568381	-0.0641233
ACA	ACA R - OT R	0.0197827	0.0278555		ACA	ACA R - OT R	-0.0123294	-0.017536		ACA	ACA R - OT R	0.0566505	0.0625467
ACA	ACA R - PAG L	0.148409	0.16317		ACA	ACA R - PAG L	0.119911	0.135582		ACA	ACA R - PAG L	0.0198989	0.0336441
ACA	ACA R - PAG R	0.124077	0.137817		ACA	ACA R - PAG R	0.0619333	0.0731636		ACA	ACA R - PAG R	0.0362304	0.0468177
ACA	ACA R - PALc L	-0.186665	-0.193403		ACA	ACA R - PALc L	-0.00672541	-0.00795846		ACA	ACA R - PALc L	-0.135492	-0.144354
ACA	ACA R - PALc R	0.143456	0.151689		ACA	ACA R - PALc R	-0.0301447	-0.0317897		ACA	ACA R - PALc R	-0.0438953	-0.0432372
ACA	ACA R - PALd L	-0.232621	-0.241693		ACA	ACA R - PALd L	-0.0115648	-0.00681554		ACA	ACA R - PALd L	-0.00166589	-0.00197155
ACA	ACA R - PALd R	0.262873	0.270046		ACA	ACA R - PALd R	-0.0733488	-0.0753077		ACA	ACA R - PALd R	-0.262928	-0.269634
ACA	ACA R - PALm L	-0.040819	-0.044017		ACA	ACA R - PALm L	0.0610216	0.0712235		ACA	ACA R - PALm L	-0.0937031	-0.105598
ACA	ACA R - PALm R	0.052373	0.0610691		ACA	ACA R - PALm R	-0.00768597	-0.0112013		ACA	ACA R - PALm R	-0.00657389	-0.0016007
ACA	ACA R - PALv L	-0.0709112	-0.0770108		ACA	ACA R - PALv L	0.0835234	0.0871892		ACA	ACA R - PALv L	-0.157162	-0.166071
ACA	ACA R - PALv R	0.156836	0.173189		ACA	ACA R - PALv R	-0.124944	-0.140753		ACA	ACA R - PALv R	0.00400655	0.0176171
ACA	ACA R - PB L	0.14347	0.152765		ACA	ACA R - PB L	0.0079152	0.010626		ACA	ACA R - PB L	0.0135757	0.0180341
ACA	ACA R - PB R	0.130029	0.136036		ACA	ACA R - PB R	0.105477	0.107		ACA	ACA R - PB R	-0.0862425	-0.0858135
ACA	ACA R - PERI L	-0.0559763	-0.0566005		ACA	ACA R - PERI L	0.039344	0.0399604		ACA	ACA R - PERI L	0.0429929	0.043626
ACA	ACA R - PERI R	-0.0119566	-0.0116738		ACA	ACA R - PERI R	-0.0343853	-0.0344371		ACA	ACA R - PERI R	-0.0934847	-0.0941655
ACA	ACA R - PIR L	-0.0169191	-0.0239971		ACA	ACA R - PIR L	-0.139866	-0.148612		ACA	ACA R - PIR L	-0.122862	-0.131223
ACA	ACA R - PIR R	0.251541	0.297226		ACA	ACA R - PIR R	-0.225278	-0.273698		ACA	ACA R - PIR R	-0.0303264	8.13136e-05
ACA	ACA R - PL L	0.0418859	0.13137		ACA	ACA R - PL L	-0.118646	-0.290069		ACA	ACA R - PL L	0.0330258	0.0881125
ACA	ACA R - PL R	0.0714921	0.251005		ACA	ACA R - PL R	-0.0740885	-0.252007		ACA	ACA R - PL R	0.0253873	0.117011
ACA	ACA R - PRNr L	0.0952162	0.0995123		ACA	ACA R - PRNr L	0.109715	0.109533		ACA	ACA R - PRNr L	-0.106763	-0.111172
ACA	ACA R - PRNr R	0.0318769	0.0319341		ACA	ACA R - PRNr R	0.0961453	0.0970094		ACA	ACA R - PRNr R	-0.0988492	-0.101284
ACA	ACA R - PTLp L	-0.168312	-0.176541		ACA	ACA R - PTLp L	0.143751	0.152948		ACA	ACA R - PTLp L	0.0662699	0.0700177
ACA	ACA R - PTLp R	-0.205842	-0.208171		ACA	ACA R - PTLp R	0.145478	0.149088		ACA	ACA R - PTLp R	-0.119306	-0.123919
ACA	ACA R - RHP L	-0.0557623	-0.0580336		ACA	ACA R - RHP L	0.158588	0.163282		ACA	ACA R - RHP L	0.136096	0.139718
ACA	ACA R - RHP R	0.019616	0.0199579		ACA	ACA R - RHP R	0.00552806	0.00538235		ACA	ACA R - RHP R	0.0586242	0.0593522
ACA	ACA R - RSP L	-0.11533	-0.118326		ACA	ACA R - RSP L	0.137868	0.144687		ACA	ACA R - RSP L	0.102271	0.107147
ACA	ACA R - RSP R	-0.0955202	-0.0974334		ACA	ACA R - RSP R	0.138959	0.141393		ACA	ACA R - RSP R	-0.00628312	-0.00658703
ACA	ACA R - SC L	-0.0322539	-0.026448		ACA	ACA R - SC L	0.234276	0.244105		ACA	ACA R - SC L	0.105586	0.115206
ACA	ACA R - SC R	0.036934	0.0389513		ACA	ACA R - SC R	0.0910472	0.0955956		ACA	ACA R - SC R	0.00431812	0.0050512
ACA	ACA R - SN L	0.132107	0.133057		ACA	ACA R - SN L	0.0173605	0.0169464		ACA	ACA R - SN L	-0.0265606	-0.0268218
ACA	ACA R - SN R	0.0109629	0.0105342		ACA	ACA R - SN R	-0.0088296	-0.00785785		ACA	ACA R - SN R	-0.111931	-0.114005
ACA	ACA R - STN L	-0.0041872	-0.00651728		ACA	ACA R - STN L	-0.0734321	-0.0759482		ACA	ACA R - STN L	-0.116283	-0.11888
ACA	ACA R - STN R	0.0118927	0.0118644		ACA	ACA R - STN R	-0.0781769	-0.0797097		ACA	ACA R - STN R	-0.106496	-0.109911
ACA	ACA R - TEa L	-0.115584	-0.121687		ACA	ACA R - TEa L	0.107426	0.112201		ACA	ACA R - TEa L	0.126885	0.133837
ACA	ACA R - TEa R	0.0145937	0.0152281		ACA	ACA R - TEa R	-0.0656863	-0.0669108		ACA	ACA R - TEa R	-0.0313364	-0.0316895
ACA	ACA R - TH L	-0.115226	-0.136798		ACA	ACA R - TH L	0.15982	0.181553		ACA	ACA R - TH L	0.111446	0.124463
ACA	ACA R - TH R	-0.00961116	-0.00995826		ACA	ACA R - TH R	0.198141	0.207112		ACA	ACA R - TH R	-0.0362499	-0.039869
ACA	ACA R - VTA L	0.0243031	0.0245805		ACA	ACA R - VTA L	-0.0220933	-0.023657		ACA	ACA R - VTA L	-0.0940991	-0.0960223
ACA	ACA R - VTA R	0.0542003	0.0549521		ACA	ACA R - VTA R	-0.0142253	-0.0153348		ACA	ACA R - VTA R	-0.101447	-0.103292
ACA	ACA R - ZI L	-0.0374155	-0.0388409		ACA	ACA R - ZI L	-0.0804458	-0.0826352		ACA	ACA R - ZI L	-0.0641036	-0.0662048
ACA	ACA R - ZI R	0.0233592	0.0233352		ACA	ACA R - ZI R	-0.0259637	-0.0259729		ACA	ACA R - ZI R	-0.0643394	-0.0644517
ACB	ACB L - ACB R	0.218718	0.283416		ACB	ACB L - ACB R	-0.147608	-0.189191		ACB	ACB L - ACB R	-0.061776	-0.0710498
ACB	ACB L - AMY L	-0.0966962	-0.108864		ACB	ACB L - AMY L	0.0962209	0.107865		ACB	ACB L - AMY L	0.0780441	0.0888291
ACB	ACB L - AMY R	-0.0969109	-0.0986771		ACB	ACB L - AMY R	-0.00652857	-0.00709469		ACB	ACB L - AMY R	0.112673	0.114439
ACB	ACB L - CB L	0.121734	0.123655		ACB	ACB L - CB L	-0.00717192	-0.00832654		ACB	ACB L - CB L	-0.0748732	-0.0762726
ACB	ACB L - CB R	0.0199534	0.0212665		ACB	ACB L - CB R	0.0978683	0.101743		ACB	ACB L - CB R	-0.08346	-0.0853648
ACB	ACB L - COA L	0.155346	0.161227		ACB	ACB L - COA L	-0.123674	-0.125871		ACB	ACB L - COA L	0.0368158	0.0370082
ACB	ACB L - COA R	-0.159477	-0.161975		ACB	ACB L - COA R	0.135755	0.138105		ACB	ACB L - COA R	0.0669108	0.0686502
ACB	ACB L - CSm L	0.0723931	0.0738528		ACB	ACB L - CSm L	-0.0334083	-0.0345837		ACB	ACB L - CSm L	0.0676055	0.0690392
ACB	ACB L - CSm R	-0.0101464	-0.0106631		ACB	ACB L - CSm R	0.0538699	0.0544454		ACB	ACB L - CSm R	0.0535218	0.053367
ACB	ACB L - FS L	0.167982	0.200874		ACB	ACB L - FS L	-0.0728657	-0.0940755		ACB	ACB L - FS L	0.0304292	0.0399048
ACB	ACB L - FS R	-0.0347082	-0.0468072		ACB	ACB L - FS R	0.0500287	0.0572348		ACB	ACB L - FS R	0.158733	0.182172
ACB	ACB L - HT L	-0.0433785	-0.0470065		ACB	ACB L - HT L	0.0258164	0.0288647		ACB	ACB L - HT L	0.118851	0.129103
ACB	ACB L - HT R	-0.106685	-0.110653		ACB	ACB L - HT R	0.0207008	0.0205236		ACB	ACB L - HT R	0.191588	0.202068
ACB	ACB L - IC L	-0.0754371	-0.0759801		ACB	ACB L - IC L	-0.0511825	-0.0516519		ACB	ACB L - IC L	0.017593	0.0180437
ACB	ACB L - IC R	-0.0734068	-0.0740833		ACB	ACB L - IC R	0.126419	0.128148		ACB	ACB L - IC R	0.0292856	0.0289591
ACB	ACB L - LSX L	0.0602996	0.114834		ACB	ACB L - LSX L	-0.0864598	-0.143978		ACB	ACB L - LSX L	-0.000478658	-0.000131758
ACB	ACB L - LSX R	0.0413304	0.0626597		ACB	ACB L - LSX R	-0.0824849	-0.106025		ACB	ACB L - LSX R	0.0108254	0.0177104
ACB	ACB L - MB R	-0.109568	-0.110645		ACB	ACB L - MB R	0.0431168	0.0441557		ACB	ACB L - MB R	0.148369	0.150168
ACB	ACB L - MRN L	0.0161782	0.0182889		ACB	ACB L - MRN L	-0.0619774	-0.0644349		ACB	ACB L - MRN L	0.111776	0.114449
ACB	ACB L - MRN R	-0.0451119	-0.0465268		ACB	ACB L - MRN R	0.0531348	0.055537		ACB	ACB L - MRN R	0.0861714	0.0880426
ACB	ACB L - MY L	0.0644884	0.0655395		ACB	ACB L - MY L	-0.0441814	-0.04493		ACB	ACB L - MY L	-0.0266907	-0.0261212
ACB	ACB L - MY R	0.0406328	0.0427261		ACB	ACB L - MY R	-0.0741203	-0.0763701		ACB	ACB L - MY R	0.033608	0.0356588
ACB	ACB L - NBM L	0.116876	0.131757		ACB	ACB L - NBM L	-0.0973566	-0.112033		ACB	ACB L - NBM L	0.0537218	0.0626406
ACB	ACB L - NBM R	-0.0100375	-0.0131127		ACB	ACB L - NBM R	-0.132926	-0.149525		ACB	ACB L - NBM R	0.203063	0.229459
ACB	ACB L - OLF L	0.00306385	-0.000292197		ACB	ACB L - OLF L	0.0651127	0.0691423		ACB	ACB L - OLF L	0.00618604	0.0123481
ACB	ACB L - OLF R	-0.0858147	-0.0900566		ACB	ACB L - OLF R	0.0783567	0.0819008		ACB	ACB L - OLF R	0.0545516	0.0565219
ACB	ACB L - OT L	0.0537328	0.120596		ACB	ACB L - OT L	-0.0402771	-0.0857776		ACB	ACB L - OT L	-0.123283	-0.277919
ACB	ACB L - OT R	0.157653	0.20531		ACB	ACB L - OT R	-0.124485	-0.163852		ACB	ACB L - OT R	-0.0218274	-0.0345724
ACB	ACB L - PAG L	0.0319871	0.0337111		ACB	ACB L - PAG L	-0.031808	-0.0332421		ACB	ACB L - PAG L	0.110292	0.112511
ACB	ACB L - PAG R	0.00673022	0.0070763		ACB	ACB L - PAG R	0.00487556	0.00543941		ACB	ACB L - PAG R	0.144183	0.147492
ACB	ACB L - PALc L	0.0157343	0.031795		ACB	ACB L - PALc L	-0.0907814	-0.130397		ACB	ACB L - PALc L	0.0964953	0.133826
ACB	ACB L - PALc R	-0.00115032	-0.0153318		ACB	ACB L - PALc R	-0.0511899	-0.0610826		ACB	ACB L - PALc R	0.10739	0.14724
ACB	ACB L - PALd L	-0.00643775	-0.000107205		ACB	ACB L - PALd L	0.0522426	0.0518789		ACB	ACB L - PALd L	-0.0265024	-0.0255361
ACB	ACB L - PALd R	0.0568956	0.0555268		ACB	ACB L - PALd R	-0.058532	-0.0609649		ACB	ACB L - PALd R	-0.0190723	-0.0170305
ACB	ACB L - PALm L	0.104641	0.223096		ACB	ACB L - PALm L	-0.122535	-0.250877		ACB	ACB L - PALm L	-0.0135448	-0.0094907
ACB	ACB L - PALm R	0.11006	0.199915		ACB	ACB L - PALm R	-0.108049	-0.180196		ACB	ACB L - PALm R	0.0455837	0.0797888
ACB	ACB L - PALv L	0.0938016	0.19855		ACB	ACB L - PALv L	-0.00713744	-0.0427863		ACB	ACB L - PALv L	-0.0436617	-0.0819103
ACB	ACB L - PALv R	0.115407	0.13765		ACB	ACB L - PALv R	-0.0876487	-0.108165		ACB	ACB L - PALv R	0.115218	0.143568
ACB	ACB L - PB L	0.0884687	0.0932375		ACB	ACB L - PB L	0.050827	0.0482002		ACB	ACB L - PB L	0.0333306	0.0380795
ACB	ACB L - PB R	-0.0602303	-0.0602673		ACB	ACB L - PB R	0.108707	0.110131		ACB	ACB L - PB R	0.0748117	0.0762938
ACB	ACB L - PRNr L	0.22428	0.230834		ACB	ACB L - PRNr L	-0.11956	-0.124996		ACB	ACB L - PRNr L	-0.0184301	-0.0188792
ACB	ACB L - PRNr R	-0.177723	-0.182687		ACB	ACB L - PRNr R	0.172213	0.177173		ACB	ACB L - PRNr R	0.086671	0.0868535
ACB	ACB L - RHP L	0.101998	0.102693		ACB	ACB L - RHP L	-0.0452988	-0.0468865		ACB	ACB L - RHP L	-0.0543161	-0.0545974
ACB	ACB L - RHP R	-0.0603018	-0.0611751		ACB	ACB L - RHP R	0.0921346	0.0959154		ACB	ACB L - RHP R	0.123875	0.124767
ACB	ACB L - SC L	0.00226767	0.00139759		ACB	ACB L - SC L	0.00446602	0.00379507		ACB	ACB L - SC L	-0.00355565	-0.00234347
ACB	ACB L - SC R	-0.0686572	-0.0695574		ACB	ACB L - SC R	0.0647104	0.0647692		ACB	ACB L - SC R	0.0948894	0.0966121
ACB	ACB L - SN L	-0.117673	-0.120931		ACB	ACB L - SN L	0.0750086	0.0786356		ACB	ACB L - SN L	0.0592424	0.0620229
ACB	ACB L - SN R	0.0798057	0.0797538		ACB	ACB L - SN R	-0.0337509	-0.0334398		ACB	ACB L - SN R	0.0333894	0.0343283
ACB	ACB L - STN L	-0.114822	-0.116161		ACB	ACB L - STN L	-0.0178414	-0.0173475		ACB	ACB L - STN L	0.165546	0.170161
ACB	ACB L - STN R	-0.110942	-0.111453		ACB	ACB L - STN R	0.0864307	0.0877533		ACB	ACB L - STN R	-0.022961	-0.023522
ACB	ACB L - TH L	0.0102779	0.00994804		ACB	ACB L - TH L	-0.0229471	-0.0224197		ACB	ACB L - TH L	0.0511144	0.0513822
ACB	ACB L - TH R	-0.146779	-0.150472		ACB	ACB L - TH R	0.036989	0.039376		ACB	ACB L - TH R	0.0802163	0.0826868
ACB	ACB L - VTA L	-0.0593417	-0.0601996		ACB	ACB L - VTA L	0.0867178	0.0878903		ACB	ACB L - VTA L	-0.0335336	-0.0331842
ACB	ACB L - VTA R	-0.178724	-0.183283		ACB	ACB L - VTA R	0.0860215	0.0881085		ACB	ACB L - VTA R	0.148502	0.153094
ACB	ACB L - ZI L	-0.022648	-0.0221223		ACB	ACB L - ZI L	-0.0363924	-0.036987		ACB	ACB L - ZI L	0.109748	0.114164
ACB	ACB L - ZI R	-0.170838	-0.173536		ACB	ACB L - ZI R	0.0550154	0.0563021		ACB	ACB L - ZI R	0.0950957	0.0954473
ACB	ACB R - AMY L	-0.10258	-0.103333		ACB	ACB R - AMY L	-0.00695626	-0.0067695		ACB	ACB R - AMY L	-0.0420286	-0.0425853
ACB	ACB R - AMY R	-0.0168365	-0.018894		ACB	ACB R - AMY R	-0.0155946	-0.0183845		ACB	ACB R - AMY R	-0.0424944	-0.046192
ACB	ACB R - CB L	0.154454	0.15829		ACB	ACB R - CB L	-0.0374483	-0.0389348		ACB	ACB R - CB L	-0.0307445	-0.0331009
ACB	ACB R - CB R	0.0938107	0.0958066		ACB	ACB R - CB R	0.04461	0.0464806		ACB	ACB R - CB R	-0.0228682	-0.0244536
ACB	ACB R - COA L	-0.0208915	-0.0218314		ACB	ACB R - COA L	-0.0210245	-0.0211639		ACB	ACB R - COA L	0.0118692	0.0137994
ACB	ACB R - COA R	-0.0417511	-0.0419646		ACB	ACB R - COA R	-0.000443905	0.00041403		ACB	ACB R - COA R	-0.0342404	-0.0350578
ACB	ACB R - CSm L	-0.106008	-0.107792		ACB	ACB R - CSm L	0.125945	0.127631		ACB	ACB R - CSm L	-0.00210363	-0.00184794
ACB	ACB R - CSm R	-0.0723909	-0.0740408		ACB	ACB R - CSm R	0.140052	0.142548		ACB	ACB R - CSm R	-0.00157396	-0.000888019
ACB	ACB R - FS L	-0.0210571	-0.0249233		ACB	ACB R - FS L	0.00845233	0.0072278		ACB	ACB R - FS L	0.0262031	0.0317593
ACB	ACB R - FS R	0.0976214	0.120341		ACB	ACB R - FS R	-0.0305388	-0.030784		ACB	ACB R - FS R	-0.0938054	-0.116719
ACB	ACB R - HT L	-0.0405125	-0.043276		ACB	ACB R - HT L	-0.079202	-0.0831137		ACB	ACB R - HT L	-0.0339307	-0.036808
ACB	ACB R - HT R	-0.0412689	-0.0459921		ACB	ACB R - HT R	0.00335321	-0.000290822		ACB	ACB R - HT R	-0.0499626	-0.0549858
ACB	ACB R - IC L	-0.0734645	-0.0762785		ACB	ACB R - IC L	0.0185165	0.0193204		ACB	ACB R - IC L	-0.0476351	-0.0484418
ACB	ACB R - IC R	-0.00705403	-0.00772492		ACB	ACB R - IC R	0.155137	0.157112		ACB	ACB R - IC R	0.0368783	0.0381722
ACB	ACB R - LSX L	0.19188	0.286241		ACB	ACB R - LSX L	-0.163809	-0.247559		ACB	ACB R - LSX L	-0.0616262	-0.0407981
ACB	ACB R - LSX R	0.207926	0.359277		ACB	ACB R - LSX R	-0.142617	-0.248013		ACB	ACB R - LSX R	-0.104368	-0.114924
ACB	ACB R - MB R	-0.11706	-0.121179		ACB	ACB R - MB R	0.107232	0.110377		ACB	ACB R - MB R	0.0839703	0.0864083
ACB	ACB R - MRN L	-0.0984305	-0.099755		ACB	ACB R - MRN L	0.0530654	0.0523471		ACB	ACB R - MRN L	0.107254	0.110156
ACB	ACB R - MRN R	-0.124966	-0.125966		ACB	ACB R - MRN R	0.13777	0.14196		ACB	ACB R - MRN R	0.121304	0.125244
ACB	ACB R - MY L	-0.00482221	-0.0047361		ACB	ACB R - MY L	0.0661976	0.0660409		ACB	ACB R - MY L	-0.207876	-0.211001
ACB	ACB R - MY R	-0.0435249	-0.0442927		ACB	ACB R - MY R	0.0659516	0.0664515		ACB	ACB R - MY R	-0.116438	-0.117725
ACB	ACB R - NBM L	-0.00679032	-0.00245491		ACB	ACB R - NBM L	-0.11024	-0.11738		ACB	ACB R - NBM L	-0.0275278	-0.0301138
ACB	ACB R - NBM R	0.0123207	0.0132341		ACB	ACB R - NBM R	-0.0771665	-0.0917722		ACB	ACB R - NBM R	-0.0513966	-0.0672805
ACB	ACB R - OLF L	0.0589345	0.0637102		ACB	ACB R - OLF L	-0.0610156	-0.0689611		ACB	ACB R - OLF L	-0.0360711	-0.0361254
ACB	ACB R - OLF R	0.0544455	0.0581788		ACB	ACB R - OLF R	-0.0297041	-0.0384685		ACB	ACB R - OLF R	-0.0218406	-0.0267859
ACB	ACB R - OT L	0.0927789	0.124387		ACB	ACB R - OT L	0.00172857	-0.00258212		ACB	ACB R - OT L	-0.114103	-0.148813
ACB	ACB R - OT R	0.01239	0.0114613		ACB	ACB R - OT R	-0.00228714	0.0109993		ACB	ACB R - OT R	-0.0687386	-0.1777
ACB	ACB R - PAG L	-0.0838138	-0.0853665		ACB	ACB R - PAG L	0.0908432	0.0929261		ACB	ACB R - PAG L	0.137834	0.143591
ACB	ACB R - PAG R	-0.106188	-0.106407		ACB	ACB R - PAG R	0.0959204	0.0986637		ACB	ACB R - PAG R	0.148481	0.153854
ACB	ACB R - PALc L	-0.0257308	-0.0312457		ACB	ACB R - PALc L	-0.0648995	-0.0798663		ACB	ACB R - PALc L	0.012452	0.0173629
ACB	ACB R - PALc R	0.0998414	0.178325		ACB	ACB R - PALc R	0.0116958	-0.00168007		ACB	ACB R - PALc R	-0.1704	-0.275221
ACB	ACB R - PALd L	-0.0487767	-0.0489535		ACB	ACB R - PALd L	-0.117328	-0.119284		ACB	ACB R - PALd L	0.0787928	0.0802614
ACB	ACB R - PALd R	0.0223659	0.0288404		ACB	ACB R - PALd R	0.0466545	0.0588645		ACB	ACB R - PALd R	-0.0895339	-0.1042
ACB	ACB R - PALm L	0.0155381	0.0314751		ACB	ACB R - PALm L	-0.0220559	-0.042369		ACB	ACB R - PALm L	-0.0964631	-0.148858
ACB	ACB R - PALm R	0.0105968	0.0247764		ACB	ACB R - PALm R	-0.0167226	-0.0475096		ACB	ACB R - PALm R	-0.080438	-0.183227
ACB	ACB R - PALv L	0.0276456	0.0364944		ACB	ACB R - PALv L	-0.0506432	-0.0640536		ACB	ACB R - PALv L	-0.063169	-0.0763696
ACB	ACB R - PALv R	0.0710796	0.141567		ACB	ACB R - PALv R	0.00367855	0.00810708		ACB	ACB R - PALv R	-0.0773305	-0.16
ACB	ACB R - PB L	0.00310216	0.00670342		ACB	ACB R - PB L	0.0206092	0.0244301		ACB	ACB R - PB L	0.144458	0.149124
ACB	ACB R - PB R	0.00301675	0.0100238		ACB	ACB R - PB R	0.15824	0.166966		ACB	ACB R - PB R	0.0280407	0.0366901
ACB	ACB R - PRNr L	-0.0430645	-0.0465441		ACB	ACB R - PRNr L	0.113738	0.117362		ACB	ACB R - PRNr L	-0.0231911	-0.0260354
ACB	ACB R - PRNr R	-0.114957	-0.120237		ACB	ACB R - PRNr R	0.139929	0.145435		ACB	ACB R - PRNr R	0.010293	0.0105406
ACB	ACB R - RHP L	0.160521	0.163024		ACB	ACB R - RHP L	0.0144042	0.0159719		ACB	ACB R - RHP L	0.0273939	0.028195
ACB	ACB R - RHP R	0.114614	0.120021		ACB	ACB R - RHP R	0.0947503	0.0992126		ACB	ACB R - RHP R	0.0584542	0.0619226
ACB	ACB R - SC L	-0.0509423	-0.0519223		ACB	ACB R - SC L	0.131625	0.133911		ACB	ACB R - SC L	0.0196512	0.0221183
ACB	ACB R - SC R	-0.0310871	-0.0316128		ACB	ACB R - SC R	0.164882	0.168137		ACB	ACB R - SC R	0.0580074	0.0586969
ACB	ACB R - SN L	-0.0490599	-0.050361		ACB	ACB R - SN L	0.00547076	0.00666424		ACB	ACB R - SN L	-0.060145	-0.0614731
ACB	ACB R - SN R	-0.0959257	-0.0968008		ACB	ACB R - SN R	0.103116	0.103948		ACB	ACB R - SN R	0.0920126	0.0928448
ACB	ACB R - STN L	-0.140456	-0.144131		ACB	ACB R - STN L	-0.0577002	-0.0607292		ACB	ACB R - STN L	0.00380342	0.000709388
ACB	ACB R - STN R	-0.06084	-0.0619327		ACB	ACB R - STN R	-0.0204902	-0.0214449		ACB	ACB R - STN R	0.000890304	0.000680674
ACB	ACB R - TH L	-0.111309	-0.113517		ACB	ACB R - TH L	-0.0576919	-0.0585002		ACB	ACB R - TH L	0.159089	0.160245
ACB	ACB R - TH R	-0.129113	-0.129147		ACB	ACB R - TH R	0.00109736	-0.000568966		ACB	ACB R - TH R	0.0656875	0.0675693
ACB	ACB R - VTA L	-0.0932522	-0.0939821		ACB	ACB R - VTA L	-0.0533715	-0.0539553		ACB	ACB R - VTA L	-0.0352433	-0.0357258
ACB	ACB R - VTA R	-0.187919	-0.194955		ACB	ACB R - VTA R	0.0784963	0.0807106		ACB	ACB R - VTA R	0.0514773	0.0551929
ACB	ACB R - ZI L	-0.122106	-0.124091		ACB	ACB R - ZI L	-0.095846	-0.0986658		ACB	ACB R - ZI L	0.0411228	0.0398658
ACB	ACB R - ZI R	-0.10504	-0.106159		ACB	ACB R - ZI R	-0.0159936	-0.0169489		ACB	ACB R - ZI R	0.0400571	0.0409568
AI	AI L - ACB L	0.0989581	0.117371		AI	AI L - ACB L	0.0709916	0.100679		AI	AI L - ACB L	-0.124964	-0.165896
AI	AI L - ACB R	0.162505	0.175831		AI	AI L - ACB R	-0.162179	-0.176894		AI	AI L - ACB R	-0.0514167	-0.0437142
AI	AI L - AI R	-0.00803799	-0.00508488		AI	AI L - AI R	0.0175687	0.0167197		AI	AI L - AI R	0.0444973	0.0568726
AI	AI L - AMY L	-0.0801634	-0.0858019		AI	AI L - AMY L	0.141105	0.145386		AI	AI L - AMY L	-0.122749	-0.125141
AI	AI L - AMY R	0.0735907	0.0780505		AI	AI L - AMY R	-0.122233	-0.127813		AI	AI L - AMY R	0.0571542	0.0620646
AI	AI L - CB L	-0.001553	-0.00164081		AI	AI L - CB L	-0.0904523	-0.0917068		AI	AI L - CB L	0.148062	0.149593
AI	AI L - CB R	0.0409818	0.0427129		AI	AI L - CB R	0.0258826	0.0246364		AI	AI L - CB R	0.0383066	0.0370773
AI	AI L - COA L	0.0427522	0.0424666		AI	AI L - COA L	-0.132557	-0.134049		AI	AI L - COA L	-0.0320951	-0.0321002
AI	AI L - COA R	0.00745657	0.00796649		AI	AI L - COA R	0.0160856	0.015745		AI	AI L - COA R	0.0239709	0.0245517
AI	AI L - CP L	-0.00866722	-0.0492051		AI	AI L - CP L	0.0500714	0.171297		AI	AI L - CP L	0.0150273	0.0797346
AI	AI L - CP R	0.104603	0.125443		AI	AI L - CP R	-0.0589183	-0.0762865		AI	AI L - CP R	-0.00155984	0.00876694
AI	AI L - CSm L	0.131405	0.134321		AI	AI L - CSm L	-0.0216657	-0.0233034		AI	AI L - CSm L	-0.0312217	-0.0324595
AI	AI L - CSm R	0.0773761	0.0778996		AI	AI L - CSm R	0.0733323	0.0744785		AI	AI L - CSm R	0.00256361	0.00293407
AI	AI L - ECT L	0.01743	0.0119546		AI	AI L - ECT L	0.130115	0.136688		AI	AI L - ECT L	0.00474743	0.00914664
AI	AI L - ECT R	-0.0840711	-0.0906976		AI	AI L - ECT R	0.0914013	0.097975		AI	AI L - ECT R	-0.10466	-0.111203
AI	AI L - ENT L	0.0757698	0.0760897		AI	AI L - ENT L	-0.142763	-0.14359		AI	AI L - ENT L	0.0286093	0.0290019
AI	AI L - ENT R	-0.133363	-0.135121		AI	AI L - ENT R	0.032062	0.0334871		AI	AI L - ENT R	0.00324024	0.00184624
AI	AI L - FS L	-0.00183332	-0.00293589		AI	AI L - FS L	0.134926	0.164683		AI	AI L - FS L	-0.0469717	-0.0617038
AI	AI L - FS R	0.171338	0.18501		AI	AI L - FS R	-0.145089	-0.157495		AI	AI L - FS R	0.00656805	0.014837
AI	AI L - HIP L	0.149083	0.153955		AI	AI L - HIP L	0.111365	0.114582		AI	AI L - HIP L	0.0444744	0.0476269
AI	AI L - HIP R	-0.127042	-0.128201		AI	AI L - HIP R	0.0505539	0.0514223		AI	AI L - HIP R	-0.0890783	-0.0907506
AI	AI L - HT L	-0.0461164	-0.0460029		AI	AI L - HT L	0.0656135	0.0680616		AI	AI L - HT L	-0.117009	-0.120193
AI	AI L - HT R	-0.0231848	-0.0239459		AI	AI L - HT R	-0.0143356	-0.0139618		AI	AI L - HT R	-0.00686048	-0.00744469
AI	AI L - IC L	0.0734241	0.0756265		AI	AI L - IC L	0.0715005	0.0706871		AI	AI L - IC L	0.0117869	0.0118869
AI	AI L - IC R	-0.0434966	-0.0441124		AI	AI L - IC R	0.080828	0.0817686		AI	AI L - IC R	-0.0444384	-0.0471762
AI	AI L - LSX L	0.0439057	0.0445846		AI	AI L - LSX L	-0.132883	-0.140449		AI	AI L - LSX L	-0.117252	-0.120106
AI	AI L - LSX R	0.1174	0.124287		AI	AI L - LSX R	-0.213285	-0.22674		AI	AI L - LSX R	-0.141253	-0.142427
AI	AI L - MB R	-0.00190777	-0.00188332		AI	AI L - MB R	0.045632	0.0478859		AI	AI L - MB R	-0.0250948	-0.0276708
AI	AI L - MOB R	0.0973069	0.109262		AI	AI L - MOB R	0.0654591	0.0833535		AI	AI L - MOB R	-0.274579	-0.332062
AI	AI L - MRN L	0.20946	0.23075		AI	AI L - MRN L	-0.0194464	-0.031646		AI	AI L - MRN L	-0.059721	-0.0591331
AI	AI L - MRN R	0.0297503	0.0269709		AI	AI L - MRN R	0.115936	0.123546		AI	AI L - MRN R	-0.0405566	-0.0402105
AI	AI L - MY L	-0.0732185	-0.0752153		AI	AI L - MY L	0.0449182	0.0470807		AI	AI L - MY L	-0.0351283	-0.0371096
AI	AI L - MY R	-0.051449	-0.0522472		AI	AI L - MY R	0.0185238	0.0190607		AI	AI L - MY R	-0.000397015	-0.000892129
AI	AI L - NBM L	-0.0514447	-0.0584768		AI	AI L - NBM L	-0.0448298	-0.0494237		AI	AI L - NBM L	-0.0277447	-0.0324298
AI	AI L - NBM R	0.0873041	0.0962256		AI	AI L - NBM R	-0.211759	-0.221631		AI	AI L - NBM R	0.0902406	0.0972814
AI	AI L - OLF L	0.0700164	0.0725287		AI	AI L - OLF L	0.015527	0.0192867		AI	AI L - OLF L	-0.189217	-0.198384
AI	AI L - OLF R	0.0449922	0.0480046		AI	AI L - OLF R	0.00616406	0.0061781		AI	AI L - OLF R	-0.0486292	-0.0510412
AI	AI L - OT L	0.114569	0.114475		AI	AI L - OT L	0.083584	0.087286		AI	AI L - OT L	-0.137517	-0.148078
AI	AI L - OT R	0.1499	0.15743		AI	AI L - OT R	-0.142391	-0.147279		AI	AI L - OT R	-0.0451901	-0.0439949
AI	AI L - PAG L	0.156646	0.166166		AI	AI L - PAG L	0.0372297	0.0370653		AI	AI L - PAG L	-0.0339925	-0.0360533
AI	AI L - PAG R	0.142481	0.149704		AI	AI L - PAG R	0.0684833	0.0726467		AI	AI L - PAG R	-0.0141726	-0.0115036
AI	AI L - PALc L	-0.0573158	-0.0715572		AI	AI L - PALc L	-0.0419356	-0.0430077		AI	AI L - PALc L	-0.0653857	-0.0779312
AI	AI L - PALc R	0.111746	0.114129		AI	AI L - PALc R	-0.136476	-0.139537		AI	AI L - PALc R	-0.0796473	-0.0787515
AI	AI L - PALd L	-0.0743709	-0.082545		AI	AI L - PALd L	0.1093	0.127029		AI	AI L - PALd L	-0.0156368	-0.00123728
AI	AI L - PALd R	0.149206	0.155597		AI	AI L - PALd R	-0.133597	-0.139		AI	AI L - PALd R	-0.0417059	-0.0379675
AI	AI L - PALm L	0.0838363	0.0805241		AI	AI L - PALm L	-0.0349423	-0.0299357		AI	AI L - PALm L	-0.14255	-0.149382
AI	AI L - PALm R	0.076507	0.0750344		AI	AI L - PALm R	-0.128678	-0.127325		AI	AI L - PALm R	-0.0662291	-0.0688805
AI	AI L - PALv L	0.0388897	0.0372832		AI	AI L - PALv L	0.153401	0.178758		AI	AI L - PALv L	-0.167663	-0.195052
AI	AI L - PALv R	0.172284	0.187841		AI	AI L - PALv R	-0.189874	-0.206023		AI	AI L - PALv R	-0.00363333	0.00749468
AI	AI L - PB L	0.0727608	0.0754567		AI	AI L - PB L	0.035085	0.0335808		AI	AI L - PB L	0.0169452	0.0192443
AI	AI L - PB R	-0.00277605	-0.00279078		AI	AI L - PB R	0.150277	0.1563		AI	AI L - PB R	-0.0242668	-0.0250841
AI	AI L - PERI L	-0.00845093	-0.00753268		AI	AI L - PERI L	0.0108603	0.00973444		AI	AI L - PERI L	0.0978345	0.103491
AI	AI L - PERI R	0.0183538	0.0176507		AI	AI L - PERI R	0.0284095	0.0293792		AI	AI L - PERI R	-0.12001	-0.122242
AI	AI L - PIR L	0.0154517	0.0214296		AI	AI L - PIR L	0.0460161	0.0682586		AI	AI L - PIR L	-0.011477	-0.0113663
AI	AI L - PIR R	0.121206	0.14238		AI	AI L - PIR R	-0.120925	-0.142109		AI	AI L - PIR R	0.0912964	0.111623
AI	AI L - PRNr L	0.102628	0.103671		AI	AI L - PRNr L	-0.0246104	-0.0243885		AI	AI L - PRNr L	0.00659097	0.00587909
AI	AI L - PRNr R	-0.0524999	-0.0567443		AI	AI L - PRNr R	0.0942187	0.0989011		AI	AI L - PRNr R	0.00994327	0.00587296
AI	AI L - PTLp L	0.0104039	0.0125282		AI	AI L - PTLp L	0.158975	0.163493		AI	AI L - PTLp L	-0.0922737	-0.100153
AI	AI L - PTLp R	-0.213518	-0.225404		AI	AI L - PTLp R	0.135746	0.143859		AI	AI L - PTLp R	-0.115359	-0.124113
AI	AI L - RHP L	0.100741	0.101466		AI	AI L - RHP L	0.10157	0.102262		AI	AI L - RHP L	-0.00251803	-0.00202931
AI	AI L - RHP R	-0.172824	-0.176843		AI	AI L - RHP R	0.0800427	0.0826135		AI	AI L - RHP R	0.0602537	0.0580921
AI	AI L - RSP L	-0.0736442	-0.0774192		AI	AI L - RSP L	0.173387	0.180294		AI	AI L - RSP L	-0.0654507	-0.070464
AI	AI L - RSP R	-0.167327	-0.1756		AI	AI L - RSP R	0.204896	0.214206		AI	AI L - RSP R	-0.131989	-0.140539
AI	AI L - SC L	0.0606242	0.0607821		AI	AI L - SC L	0.163342	0.169205		AI	AI L - SC L	-0.0648328	-0.0673769
AI	AI L - SC R	-0.010124	-0.0106209		AI	AI L - SC R	0.131466	0.133882		AI	AI L - SC R	-0.0496068	-0.0498925
AI	AI L - SN L	0.06844	0.068362		AI	AI L - SN L	0.0242667	0.0249279		AI	AI L - SN L	-0.114175	-0.117336
AI	AI L - SN R	-0.0213465	-0.020511		AI	AI L - SN R	-0.00790526	-0.00884056		AI	AI L - SN R	0.0295693	0.0307329
AI	AI L - STN L	-0.027798	-0.0280426		AI	AI L - STN L	0.0532387	0.0539826		AI	AI L - STN L	-0.0978186	-0.098774
AI	AI L - STN R	0.0398238	0.0406548		AI	AI L - STN R	-0.0497729	-0.0505756		AI	AI L - STN R	-0.0497129	-0.0501686
AI	AI L - TEa L	0.0210192	0.0180594		AI	AI L - TEa L	0.0997152	0.103829		AI	AI L - TEa L	0.0188772	0.0198924
AI	AI L - TEa R	-0.100235	-0.106664		AI	AI L - TEa R	0.10462	0.111083		AI	AI L - TEa R	-0.105103	-0.110901
AI	AI L - TH L	0.118604	0.119608		AI	AI L - TH L	0.0418935	0.0427442		AI	AI L - TH L	-0.0253985	-0.0254496
AI	AI L - TH R	0.0565607	0.0601461		AI	AI L - TH R	0.00487105	0.00125336		AI	AI L - TH R	-0.0956313	-0.101047
AI	AI L - VTA L	0.0276504	0.0276156		AI	AI L - VTA L	0.0648953	0.0674073		AI	AI L - VTA L	-0.130716	-0.133543
AI	AI L - VTA R	0.0071339	0.00680628		AI	AI L - VTA R	0.111642	0.112298		AI	AI L - VTA R	-0.00208867	-0.00187762
AI	AI L - ZI L	0.0497883	0.0504169		AI	AI L - ZI L	0.0112073	0.011067		AI	AI L - ZI L	-0.137635	-0.138737
AI	AI L - ZI R	0.0418946	0.0424064		AI	AI L - ZI R	-0.0174733	-0.0177447		AI	AI L - ZI R	-0.0232777	-0.0237092
AI	AI R - ACB L	-0.0171596	-0.0103285		AI	AI R - ACB L	-0.00589014	-0.0193166		AI	AI R - ACB L	-0.0091295	-0.00559359
AI	AI R - ACB R	0.186093	0.297185		AI	AI R - ACB R	-0.0973008	-0.152711		AI	AI R - ACB R	-0.120614	-0.13351
AI	AI R - AMY L	-0.185719	-0.190695		AI	AI R - AMY L	0.060454	0.05992		AI	AI R - AMY L	-0.0897361	-0.0925688
AI	AI R - AMY R	0.0977428	0.0994792		AI	AI R - AMY R	-0.0822669	-0.0864246		AI	AI R - AMY R	-0.162798	-0.169615
AI	AI R - CB L	-0.0865697	-0.088304		AI	AI R - CB L	0.0299082	0.0298537		AI	AI R - CB L	0.108531	0.109521
AI	AI R - CB R	0.0667208	0.0684794		AI	AI R - CB R	0.130101	0.131481		AI	AI R - CB R	0.0903298	0.0920526
AI	AI R - COA L	-0.0708109	-0.0715648		AI	AI R - COA L	-0.0190629	-0.0197101		AI	AI R - COA L	0.0129596	0.0129237
AI	AI R - COA R	0.06018	0.0611193		AI	AI R - COA R	-0.0474324	-0.0488588		AI	AI R - COA R	-0.125016	-0.126703
AI	AI R - CP L	-0.114415	-0.122275		AI	AI R - CP L	0.0107236	0.0131461		AI	AI R - CP L	0.0575364	0.0613792
AI	AI R - CP R	0.164789	0.451056		AI	AI R - CP R	-0.0242531	-0.0443618		AI	AI R - CP R	-0.159069	-0.431879
AI	AI R - CSm L	-0.00225843	-0.00311061		AI	AI R - CSm L	0.024836	0.0252314		AI	AI R - CSm L	-0.02893	-0.0283695
AI	AI R - CSm R	0.0682337	0.0690178		AI	AI R - CSm R	0.00862565	0.00824545		AI	AI R - CSm R	-0.016736	-0.0171953
AI	AI R - ECT L	0.110293	0.112168		AI	AI R - ECT L	0.101869	0.102275		AI	AI R - ECT L	0.0669173	0.0689603
AI	AI R - ECT R	0.0379451	0.0387401		AI	AI R - ECT R	0.0815083	0.0821178		AI	AI R - ECT R	-0.0350961	-0.0344112
AI	AI R - ENT L	0.0884352	0.0895616		AI	AI R - ENT L	-0.0613349	-0.0630953		AI	AI R - ENT L	-0.0621647	-0.0620333
AI	AI R - ENT R	0.0872452	0.0880741		AI	AI R - ENT R	0.0956119	0.0963907		AI	AI R - ENT R	-0.00387026	-0.00346615
AI	AI R - FS L	-0.163875	-0.177988		AI	AI R - FS L	0.150387	0.165351		AI	AI R - FS L	-0.0254688	-0.0255941
AI	AI R - FS R	0.234344	0.278296		AI	AI R - FS R	-0.104481	-0.100065		AI	AI R - FS R	-0.216423	-0.258399
AI	AI R - HIP L	0.0751309	0.0794226		AI	AI R - HIP L	0.0680681	0.072087		AI	AI R - HIP L	0.122938	0.127615
AI	AI R - HIP R	0.0970999	0.102366		AI	AI R - HIP R	-0.0200653	-0.0221215		AI	AI R - HIP R	-0.0343166	-0.0379294
AI	AI R - HT L	-0.110747	-0.115443		AI	AI R - HT L	-0.0183654	-0.0222852		AI	AI R - HT L	-0.0105465	-0.0142086
AI	AI R - HT R	0.0142311	0.011407		AI	AI R - HT R	-0.0203618	-0.0236869		AI	AI R - HT R	-0.142204	-0.148832
AI	AI R - IC L	-0.154574	-0.159241		AI	AI R - IC L	0.125011	0.123822		AI	AI R - IC L	0.0340999	0.0362499
AI	AI R - IC R	0.0734797	0.0760901		AI	AI R - IC R	0.0926609	0.0939748		AI	AI R - IC R	0.0310661	0.0335369
AI	AI R - LSX L	0.0661477	0.10117		AI	AI R - LSX L	-0.148317	-0.198458		AI	AI R - LSX L	-0.0783607	-0.0480544
AI	AI R - LSX R	0.237481	0.334885		AI	AI R - LSX R	-0.182922	-0.274765		AI	AI R - LSX R	-0.159226	-0.132416
AI	AI R - MB R	0.10307	0.113469		AI	AI R - MB R	0.00386099	0.00468046		AI	AI R - MB R	0.02402	0.0258099
AI	AI R - MOB R	-0.0482915	-0.0642421		AI	AI R - MOB R	0.0627626	0.0817013		AI	AI R - MOB R	-0.0333316	-0.0431385
AI	AI R - MRN L	0.00511811	0.00297079		AI	AI R - MRN L	0.0125923	0.0145775		AI	AI R - MRN L	0.122049	0.126577
AI	AI R - MRN R	0.0871656	0.0921545		AI	AI R - MRN R	0.0538572	0.0633397		AI	AI R - MRN R	0.0809459	0.091388
AI	AI R - MY L	-0.0596648	-0.0599927		AI	AI R - MY L	0.00755265	0.00770852		AI	AI R - MY L	-0.0394824	-0.0398732
AI	AI R - MY R	-0.0839574	-0.0844374		AI	AI R - MY R	0.0123508	0.012365		AI	AI R - MY R	0.0200875	0.0201039
AI	AI R - NBM L	-0.092791	-0.0942638		AI	AI R - NBM L	-0.0392315	-0.0408414		AI	AI R - NBM L	0.0110324	0.0118183
AI	AI R - NBM R	0.117117	0.125398		AI	AI R - NBM R	-0.15219	-0.17257		AI	AI R - NBM R	-0.21557	-0.249076
AI	AI R - OLF L	-0.0319769	-0.0340904		AI	AI R - OLF L	-0.0209703	-0.0216714		AI	AI R - OLF L	-0.0391098	-0.0451058
AI	AI R - OLF R	0.143327	0.162261		AI	AI R - OLF R	-0.0577374	-0.0685009		AI	AI R - OLF R	-0.116927	-0.130385
AI	AI R - OT L	-0.0277402	-0.0300099		AI	AI R - OT L	0.0248159	0.0273944		AI	AI R - OT L	-0.105684	-0.112277
AI	AI R - OT R	0.110122	0.0943788		AI	AI R - OT R	-0.0971529	-0.0785177		AI	AI R - OT R	-0.13183	-0.157801
AI	AI R - PAG L	-0.0157962	-0.0208161		AI	AI R - PAG L	0.123411	0.136365		AI	AI R - PAG L	0.101023	0.114827
AI	AI R - PAG R	0.00909771	0.00949172		AI	AI R - PAG R	0.082543	0.096865		AI	AI R - PAG R	0.131451	0.147191
AI	AI R - PALc L	-0.257065	-0.273319		AI	AI R - PALc L	-0.0159119	-0.0284274		AI	AI R - PALc L	0.0499891	0.0556443
AI	AI R - PALc R	0.163386	0.17448		AI	AI R - PALc R	-0.0557743	-0.0576942		AI	AI R - PALc R	-0.293803	-0.352153
AI	AI R - PALd L	-0.188321	-0.192532		AI	AI R - PALd L	0.0112414	0.0116852		AI	AI R - PALd L	0.157228	0.160494
AI	AI R - PALd R	0.138687	0.156389		AI	AI R - PALd R	0.0150292	0.020963		AI	AI R - PALd R	-0.314358	-0.368826
AI	AI R - PALm L	-0.0678782	-0.0796853		AI	AI R - PALm L	-0.0170276	-0.017355		AI	AI R - PALm L	-0.107005	-0.119334
AI	AI R - PALm R	0.0476193	0.0306246		AI	AI R - PALm R	-0.0710026	-0.0576692		AI	AI R - PALm R	-0.158256	-0.188574
AI	AI R - PALv L	-0.13626	-0.145801		AI	AI R - PALv L	0.0717968	0.071228		AI	AI R - PALv L	-0.0875571	-0.0958219
AI	AI R - PALv R	0.193723	0.208616		AI	AI R - PALv R	-0.115642	-0.113444		AI	AI R - PALv R	-0.226012	-0.262596
AI	AI R - PB L	0.0399002	0.0411284		AI	AI R - PB L	0.0166056	0.0177474		AI	AI R - PB L	0.112609	0.114814
AI	AI R - PB R	0.125875	0.148288		AI	AI R - PB R	0.198502	0.221121		AI	AI R - PB R	0.0710127	0.0913121
AI	AI R - PERI L	0.0518614	0.0468683		AI	AI R - PERI L	0.151275	0.157855		AI	AI R - PERI L	-0.0363917	-0.0420912
AI	AI R - PERI R	-0.0864265	-0.0868768		AI	AI R - PERI R	0.0879303	0.088643		AI	AI R - PERI R	-0.0724211	-0.0729937
AI	AI R - PIR L	-0.101527	-0.115196		AI	AI R - PIR L	0.0232016	0.0283121		AI	AI R - PIR L	0.0205827	0.0158839
AI	AI R - PIR R	0.200103	0.391525		AI	AI R - PIR R	-0.0732647	-0.153707		AI	AI R - PIR R	-0.0889286	-0.117403
AI	AI R - PRNr L	-0.0773325	-0.0800713		AI	AI R - PRNr L	0.056571	0.0588662		AI	AI R - PRNr L	0.000836346	-0.000696958
AI	AI R - PRNr R	0.0523891	0.0531245		AI	AI R - PRNr R	0.0589773	0.0598719		AI	AI R - PRNr R	0.0018322	0.00355328
AI	AI R - PTLp L	-0.00839879	-0.0125828		AI	AI R - PTLp L	0.116028	0.123806		AI	AI R - PTLp L	-0.0872594	-0.0959858
AI	AI R - PTLp R	-0.0706653	-0.0728139		AI	AI R - PTLp R	0.0726247	0.0748163		AI	AI R - PTLp R	-0.146937	-0.149727
AI	AI R - RHP L	0.0805308	0.0822557		AI	AI R - RHP L	0.116074	0.117859		AI	AI R - RHP L	0.106059	0.10745
AI	AI R - RHP R	0.137402	0.145387		AI	AI R - RHP R	0.0627354	0.0648547		AI	AI R - RHP R	0.0811395	0.0874801
AI	AI R - RSP L	-0.0201177	-0.0267674		AI	AI R - RSP L	0.132241	0.141186		AI	AI R - RSP L	0.0123755	0.00468078
AI	AI R - RSP R	0.0290649	0.0203422		AI	AI R - RSP R	0.0878615	0.0972492		AI	AI R - RSP R	-0.107916	-0.11718
AI	AI R - SC L	-0.0600119	-0.0597141		AI	AI R - SC L	0.209539	0.217822		AI	AI R - SC L	0.111229	0.118753
AI	AI R - SC R	0.0396719	0.0417028		AI	AI R - SC R	0.112616	0.118397		AI	AI R - SC R	0.0615649	0.0644309
AI	AI R - SN L	-0.0510363	-0.0524406		AI	AI R - SN L	-0.0656539	-0.0663483		AI	AI R - SN L	-0.0534963	-0.0555651
AI	AI R - SN R	0.0692324	0.0699483		AI	AI R - SN R	-0.00994484	-0.0105433		AI	AI R - SN R	-0.00437238	-0.0042011
AI	AI R - STN L	-0.186924	-0.194855		AI	AI R - STN L	0.0171566	0.0143372		AI	AI R - STN L	-0.0352715	-0.0392112
AI	AI R - STN R	0.082609	0.0823331		AI	AI R - STN R	-0.121353	-0.123346		AI	AI R - STN R	-0.10398	-0.105339
AI	AI R - TEa L	0.0884452	0.0905528		AI	AI R - TEa L	0.106782	0.109111		AI	AI R - TEa L	0.0741959	0.0754299
AI	AI R - TEa R	0.0197949	0.0203021		AI	AI R - TEa R	0.0531715	0.054506		AI	AI R - TEa R	-0.0236243	-0.0216823
AI	AI R - TH L	-0.0462146	-0.0489897		AI	AI R - TH L	0.0289264	0.0317787		AI	AI R - TH L	0.0929247	0.092713
AI	AI R - TH R	0.0699844	0.0753072		AI	AI R - TH R	-0.0855495	-0.0918441		AI	AI R - TH R	-0.113439	-0.115548
AI	AI R - VTA L	-0.051058	-0.0519148		AI	AI R - VTA L	-0.0333947	-0.0336802		AI	AI R - VTA L	0.019728	0.019577
AI	AI R - VTA R	-0.026766	-0.0270149		AI	AI R - VTA R	-0.017905	-0.017914		AI	AI R - VTA R	-0.0175499	-0.0176048
AI	AI R - ZI L	-0.143126	-0.146871		AI	AI R - ZI L	-0.0384825	-0.0416657		AI	AI R - ZI L	0.0152402	0.0144911
AI	AI R - ZI R	0.0546829	0.0543669		AI	AI R - ZI R	-0.115469	-0.117297		AI	AI R - ZI R	-0.117131	-0.118347
AMY	AMY L - AMY R	-0.179234	-0.184089		AMY	AMY L - AMY R	-0.0916344	-0.0947374		AMY	AMY L - AMY R	0.0332555	0.0359625
AMY	AMY L - CB L	-0.0401295	-0.0413464		AMY	AMY L - CB L	0.0314879	0.0313489		AMY	AMY L - CB L	0.141445	0.148489
AMY	AMY L - CB R	0.0424165	0.0416704		AMY	AMY L - CB R	0.0377692	0.0371892		AMY	AMY L - CB R	0.097405	0.100706
AMY	AMY L - COA L	0.0433538	0.0870787		AMY	AMY L - COA L	-0.0349888	-0.052328		AMY	AMY L - COA L	-0.0987344	-0.117126
AMY	AMY L - COA R	-0.0932139	-0.0957161		AMY	AMY L - COA R	0.00486202	0.00686696		AMY	AMY L - COA R	0.0476724	0.0457315
AMY	AMY L - CSm L	-0.0633699	-0.0654291		AMY	AMY L - CSm L	-0.23209	-0.235671		AMY	AMY L - CSm L	0.0250685	0.0258879
AMY	AMY L - CSm R	-0.080981	-0.0815567		AMY	AMY L - CSm R	-0.157437	-0.158935		AMY	AMY L - CSm R	0.130672	0.132115
AMY	AMY L - HT L	-0.0447682	-0.0590006		AMY	AMY L - HT L	-0.032335	-0.0332098		AMY	AMY L - HT L	-0.0680607	-0.0830084
AMY	AMY L - HT R	-0.0671349	-0.068291		AMY	AMY L - HT R	-0.132686	-0.133817		AMY	AMY L - HT R	0.017524	0.0175906
AMY	AMY L - IC L	0.00725482	0.00744447		AMY	AMY L - IC L	0.0499923	0.0502808		AMY	AMY L - IC L	0.0536758	0.0542749
AMY	AMY L - IC R	-0.0242385	-0.0245783		AMY	AMY L - IC R	0.106955	0.108107		AMY	AMY L - IC R	-0.0734725	-0.0731179
AMY	AMY L - MB R	0.0237184	0.023223		AMY	AMY L - MB R	-0.0516027	-0.0515568		AMY	AMY L - MB R	0.0133478	0.0113737
AMY	AMY L - MRN L	0.0721757	0.0725427		AMY	AMY L - MRN L	-0.053413	-0.0537134		AMY	AMY L - MRN L	-0.0816686	-0.0820776
AMY	AMY L - MRN R	-0.00704457	-0.00737547		AMY	AMY L - MRN R	-0.0799554	-0.0801904		AMY	AMY L - MRN R	-0.0163661	-0.0198747
AMY	AMY L - MY L	0.08794	0.0891438		AMY	AMY L - MY L	-0.153327	-0.154907		AMY	AMY L - MY L	-0.00232585	-0.00313271
AMY	AMY L - MY R	0.0710241	0.0714316		AMY	AMY L - MY R	-0.169161	-0.171488		AMY	AMY L - MY R	0.00548595	0.00543997
AMY	AMY L - NBM L	-0.122353	-0.147991		AMY	AMY L - NBM L	0.029829	0.0430506		AMY	AMY L - NBM L	0.10685	0.133201
AMY	AMY L - NBM R	-0.049283	-0.0505926		AMY	AMY L - NBM R	-0.0204112	-0.0213079		AMY	AMY L - NBM R	-0.0501036	-0.0512701
AMY	AMY L - OLF L	-0.136588	-0.216739		AMY	AMY L - OLF L	0.133899	0.206801		AMY	AMY L - OLF L	-0.18144	-0.293862
AMY	AMY L - OLF R	-0.203933	-0.20792		AMY	AMY L - OLF R	0.0461121	0.0478345		AMY	AMY L - OLF R	-0.00373858	-0.00539251
AMY	AMY L - PAG L	0.00992607	0.00815705		AMY	AMY L - PAG L	-0.024044	-0.026354		AMY	AMY L - PAG L	0.050597	0.0525521
AMY	AMY L - PAG R	-0.0102454	-0.0130392		AMY	AMY L - PAG R	0.0308229	0.0304139		AMY	AMY L - PAG R	0.0199413	0.0209708
AMY	AMY L - PALc L	-0.161666	-0.168091		AMY	AMY L - PALc L	-0.00126988	0.00159089		AMY	AMY L - PALc L	0.0421548	0.0420743
AMY	AMY L - PALc R	-0.0874597	-0.0893338		AMY	AMY L - PALc R	0.0109192	0.0115838		AMY	AMY L - PALc R	-0.0229576	-0.0245485
AMY	AMY L - PALd L	-0.0901176	-0.107891		AMY	AMY L - PALd L	0.136783	0.16513		AMY	AMY L - PALd L	-0.0983035	-0.114928
AMY	AMY L - PALd R	-0.0281127	-0.0294006		AMY	AMY L - PALd R	-0.101169	-0.105336		AMY	AMY L - PALd R	-0.0431624	-0.0425976
AMY	AMY L - PALm L	-0.173962	-0.179766		AMY	AMY L - PALm L	-0.00536894	-0.00239856		AMY	AMY L - PALm L	0.113662	0.116717
AMY	AMY L - PALm R	-0.135964	-0.138108		AMY	AMY L - PALm R	0.079915	0.0818468		AMY	AMY L - PALm R	-0.0084944	-0.00962857
AMY	AMY L - PALv L	-0.144505	-0.19127		AMY	AMY L - PALv L	0.0632451	0.0901784		AMY	AMY L - PALv L	0.0411173	0.0602823
AMY	AMY L - PALv R	-0.137753	-0.138639		AMY	AMY L - PALv R	-0.00350121	-0.00329553		AMY	AMY L - PALv R	0.00878879	0.00844809
AMY	AMY L - PB L	0.0119182	0.0125144		AMY	AMY L - PB L	-0.0113027	-0.0116256		AMY	AMY L - PB L	0.0536494	0.0540744
AMY	AMY L - PB R	-0.0280875	-0.0290374		AMY	AMY L - PB R	-0.00655874	-0.0072284		AMY	AMY L - PB R	0.0731014	0.0743969
AMY	AMY L - PRNr L	0.0407085	0.0417424		AMY	AMY L - PRNr L	-0.278483	-0.284947		AMY	AMY L - PRNr L	-0.0617032	-0.062534
AMY	AMY L - PRNr R	-0.0252048	-0.0265019		AMY	AMY L - PRNr R	-0.0196106	-0.0209908		AMY	AMY L - PRNr R	0.0650698	0.0672301
AMY	AMY L - RHP L	-0.0744849	-0.0770095		AMY	AMY L - RHP L	0.0225515	0.0242109		AMY	AMY L - RHP L	-0.0705166	-0.0740395
AMY	AMY L - RHP R	-0.0270548	-0.0276292		AMY	AMY L - RHP R	0.148827	0.150754		AMY	AMY L - RHP R	-0.11336	-0.114798
AMY	AMY L - SC L	0.0240284	0.0245633		AMY	AMY L - SC L	0.115637	0.116656		AMY	AMY L - SC L	-0.0264524	-0.0265864
AMY	AMY L - SC R	-0.0657735	-0.0665106		AMY	AMY L - SC R	0.146949	0.149474		AMY	AMY L - SC R	-0.0650587	-0.0666341
AMY	AMY L - SN L	0.00557913	0.00913857		AMY	AMY L - SN L	0.0499544	0.0583103		AMY	AMY L - SN L	-0.124357	-0.140944
AMY	AMY L - SN R	-0.0591619	-0.0640284		AMY	AMY L - SN R	-0.139151	-0.141812		AMY	AMY L - SN R	0.0578768	0.055774
AMY	AMY L - STN L	0.129672	0.158066		AMY	AMY L - STN L	-0.108185	-0.13195		AMY	AMY L - STN L	-0.0528014	-0.0498596
AMY	AMY L - STN R	-0.0394856	-0.0420214		AMY	AMY L - STN R	-0.122139	-0.124914		AMY	AMY L - STN R	0.0796244	0.0823379
AMY	AMY L - TH L	0.0846191	0.0870463		AMY	AMY L - TH L	0.132629	0.135427		AMY	AMY L - TH L	-0.177349	-0.180993
AMY	AMY L - TH R	0.0518414	0.051807		AMY	AMY L - TH R	0.0474681	0.0479567		AMY	AMY L - TH R	-0.0265574	-0.0290818
AMY	AMY L - VTA L	-0.0260463	-0.0289498		AMY	AMY L - VTA L	0.0350657	0.0369529		AMY	AMY L - VTA L	-0.209441	-0.221304
AMY	AMY L - VTA R	-0.0280332	-0.0272303		AMY	AMY L - VTA R	-0.133924	-0.136194		AMY	AMY L - VTA R	0.00827879	0.00769761
AMY	AMY L - ZI L	0.0686941	0.0725916		AMY	AMY L - ZI L	-0.118172	-0.127998		AMY	AMY L - ZI L	-0.108056	-0.120698
AMY	AMY L - ZI R	0.0505812	0.0505279		AMY	AMY L - ZI R	-0.0923523	-0.0936143		AMY	AMY L - ZI R	-0.00205008	-0.00127164
AMY	AMY R - CB L	0.102849	0.106859		AMY	AMY R - CB L	0.025192	0.0264357		AMY	AMY R - CB L	-0.0233347	-0.0239127
AMY	AMY R - CB R	0.0310922	0.0318048		AMY	AMY R - CB R	0.115135	0.122794		AMY	AMY R - CB R	-0.0912678	-0.0981542
AMY	AMY R - COA L	0.0883355	0.0888308		AMY	AMY R - COA L	-0.0900971	-0.0905084		AMY	AMY R - COA L	-0.0370636	-0.0371644
AMY	AMY R - COA R	-0.0728751	-0.14		AMY	AMY R - COA R	-0.0319147	-0.0745758		AMY	AMY R - COA R	0.00172992	-0.0294467
AMY	AMY R - CSm L	-0.0592362	-0.0596961		AMY	AMY R - CSm L	0.0532677	0.0537216		AMY	AMY R - CSm L	-0.0508545	-0.0513399
AMY	AMY R - CSm R	-0.0446463	-0.0454479		AMY	AMY R - CSm R	0.0431136	0.0439088		AMY	AMY R - CSm R	-0.0682791	-0.0692222
AMY	AMY R - HT L	-0.0509583	-0.0517509		AMY	AMY R - HT L	-0.126904	-0.127859		AMY	AMY R - HT L	0.0212816	0.0206604
AMY	AMY R - HT R	-0.0376542	-0.0559666		AMY	AMY R - HT R	-0.0899956	-0.137529		AMY	AMY R - HT R	-0.00262952	-0.00441479
AMY	AMY R - IC L	-0.0423927	-0.0447728		AMY	AMY R - IC L	0.0268193	0.0250034		AMY	AMY R - IC L	0.0233817	0.0260794
AMY	AMY R - IC R	-0.0265178	-0.0272582		AMY	AMY R - IC R	0.0987628	0.101912		AMY	AMY R - IC R	-0.00476189	-0.00571023
AMY	AMY R - MB R	-0.113867	-0.116919		AMY	AMY R - MB R	-0.0334952	-0.0320649		AMY	AMY R - MB R	-0.000283885	-0.00226984
AMY	AMY R - MRN L	-0.0638596	-0.0661922		AMY	AMY R - MRN L	0.197754	0.206729		AMY	AMY R - MRN L	-0.014641	-0.0156976
AMY	AMY R - MRN R	-0.0646954	-0.0692315		AMY	AMY R - MRN R	0.134444	0.139785		AMY	AMY R - MRN R	-0.0236674	-0.0283556
AMY	AMY R - MY L	-0.14409	-0.14543		AMY	AMY R - MY L	-0.0270536	-0.0272601		AMY	AMY R - MY L	-0.0668718	-0.0677824
AMY	AMY R - MY R	-0.140822	-0.141729		AMY	AMY R - MY R	-0.0215054	-0.0216475		AMY	AMY R - MY R	-0.054305	-0.0550941
AMY	AMY R - NBM L	0.0573132	0.057788		AMY	AMY R - NBM L	-0.0195135	-0.0196854		AMY	AMY R - NBM L	0.0421027	0.0424141
AMY	AMY R - NBM R	-0.0447606	-0.0784688		AMY	AMY R - NBM R	-0.161156	-0.218222		AMY	AMY R - NBM R	0.0406193	0.0748097
AMY	AMY R - OLF L	0.0343636	0.0337563		AMY	AMY R - OLF L	-0.202655	-0.204528		AMY	AMY R - OLF L	0.00866001	0.00932205
AMY	AMY R - OLF R	-0.0972389	-0.190689		AMY	AMY R - OLF R	0.0201273	-0.0334296		AMY	AMY R - OLF R	-0.0810284	-0.202403
AMY	AMY R - PAG L	-0.112585	-0.114261		AMY	AMY R - PAG L	0.219276	0.225056		AMY	AMY R - PAG L	0.0195171	0.0206502
AMY	AMY R - PAG R	-0.081785	-0.0860504		AMY	AMY R - PAG R	0.1686	0.174842		AMY	AMY R - PAG R	0.0194593	0.017426
AMY	AMY R - PALc L	0.00507054	0.00527536		AMY	AMY R - PALc L	0.0500842	0.0511177		AMY	AMY R - PALc L	0.107182	0.108126
AMY	AMY R - PALc R	-0.0764524	-0.0864756		AMY	AMY R - PALc R	-0.0810288	-0.0954929		AMY	AMY R - PALc R	0.00673838	0.00842215
AMY	AMY R - PALd L	-0.143902	-0.148828		AMY	AMY R - PALd L	0.106698	0.11083		AMY	AMY R - PALd L	0.172389	0.177131
AMY	AMY R - PALd R	0.114282	0.195753		AMY	AMY R - PALd R	-0.088656	-0.149953		AMY	AMY R - PALd R	-0.0329782	-0.0417204
AMY	AMY R - PALm L	-0.0438338	-0.0436866		AMY	AMY R - PALm L	0.00658333	0.0069334		AMY	AMY R - PALm L	-0.0114547	-0.0118463
AMY	AMY R - PALm R	-0.180991	-0.191818		AMY	AMY R - PALm R	-0.041232	-0.047632		AMY	AMY R - PALm R	0.0691173	0.071162
AMY	AMY R - PALv L	-0.0717858	-0.0732476		AMY	AMY R - PALv L	0.021769	0.0216507		AMY	AMY R - PALv L	0.0168039	0.017799
AMY	AMY R - PALv R	-0.0520159	-0.0949551		AMY	AMY R - PALv R	-0.0945782	-0.14612		AMY	AMY R - PALv R	0.0212717	0.0343552
AMY	AMY R - PB L	0.0011009	0.00225116		AMY	AMY R - PB L	0.154056	0.156326		AMY	AMY R - PB L	-0.0053801	-0.00462556
AMY	AMY R - PB R	-0.147218	-0.154379		AMY	AMY R - PB R	0.106578	0.110827		AMY	AMY R - PB R	0.0619737	0.0606178
AMY	AMY R - PRNr L	0.0258915	0.0270806		AMY	AMY R - PRNr L	0.117684	0.120946		AMY	AMY R - PRNr L	-0.110848	-0.114078
AMY	AMY R - PRNr R	-0.201082	-0.203595		AMY	AMY R - PRNr R	-0.0204712	-0.020589		AMY	AMY R - PRNr R	-0.0181576	-0.0181636
AMY	AMY R - RHP L	0.0943874	0.101452		AMY	AMY R - RHP L	0.210252	0.219478		AMY	AMY R - RHP L	0.068612	0.0730695
AMY	AMY R - RHP R	-0.0496539	-0.0515501		AMY	AMY R - RHP R	-0.0263551	-0.0276052		AMY	AMY R - RHP R	0.136656	0.138737
AMY	AMY R - SC L	-0.00980175	-0.00844632		AMY	AMY R - SC L	0.158563	0.161787		AMY	AMY R - SC L	0.0264029	0.0302759
AMY	AMY R - SC R	-0.00419374	-0.00562526		AMY	AMY R - SC R	0.0778572	0.0795614		AMY	AMY R - SC R	0.018692	0.0174949
AMY	AMY R - SN L	-0.10927	-0.111244		AMY	AMY R - SN L	-0.0377073	-0.037574		AMY	AMY R - SN L	-0.028595	-0.0293367
AMY	AMY R - SN R	-0.0493643	-0.0493		AMY	AMY R - SN R	-0.050182	-0.0552787		AMY	AMY R - SN R	-0.0311245	-0.0350277
AMY	AMY R - STN L	-0.0847792	-0.0851871		AMY	AMY R - STN L	-0.131963	-0.132973		AMY	AMY R - STN L	-0.0196447	-0.0198985
AMY	AMY R - STN R	-0.0478086	-0.0707844		AMY	AMY R - STN R	-0.00969091	-0.0145101		AMY	AMY R - STN R	0.00252942	0.0124046
AMY	AMY R - TH L	-0.0631391	-0.0660525		AMY	AMY R - TH L	0.118082	0.127719		AMY	AMY R - TH L	0.0801461	0.0875553
AMY	AMY R - TH R	-0.0470458	-0.0475303		AMY	AMY R - TH R	0.0366499	0.0381282		AMY	AMY R - TH R	-0.0135769	-0.0136251
AMY	AMY R - VTA L	0.00883027	0.00950523		AMY	AMY R - VTA L	-0.0240495	-0.0248769		AMY	AMY R - VTA L	-0.0958794	-0.0969447
AMY	AMY R - VTA R	-0.25423	-0.293686		AMY	AMY R - VTA R	-0.0537379	-0.0733972		AMY	AMY R - VTA R	0.0166939	0.0297396
AMY	AMY R - ZI L	-0.0589766	-0.0590993		AMY	AMY R - ZI L	-0.0608701	-0.0611058		AMY	AMY R - ZI L	0.0402783	0.0404051
AMY	AMY R - ZI R	-0.108011	-0.139443		AMY	AMY R - ZI R	-0.0427435	-0.0518131		AMY	AMY R - ZI R	0.0322551	0.0386977
AUD	AUD L - ACA L	-0.228152	-0.234799		AUD	AUD L - ACA L	0.252835	0.260102		AUD	AUD L - ACA L	0.0648156	0.0670624
AUD	AUD L - ACA R	-0.191143	-0.197389		AUD	AUD L - ACA R	0.257691	0.264614		AUD	AUD L - ACA R	0.0938763	0.0981733
AUD	AUD L - ACB L	0.0111175	0.00639503		AUD	AUD L - ACB L	0.0663689	0.0712255		AUD	AUD L - ACB L	-0.131078	-0.138099
AUD	AUD L - ACB R	0.0748708	0.0775052		AUD	AUD L - ACB R	0.149172	0.152423		AUD	AUD L - ACB R	-0.0885879	-0.0893925
AUD	AUD L - AI L	0.0100368	0.00794517		AUD	AUD L - AI L	0.143222	0.14733		AUD	AUD L - AI L	0.0650586	0.0665099
AUD	AUD L - AI R	0.0784489	0.0841398		AUD	AUD L - AI R	0.172735	0.177704		AUD	AUD L - AI R	-0.016738	-0.0167773
AUD	AUD L - AMY L	0.0262574	0.0279573		AUD	AUD L - AMY L	0.0373913	0.038882		AUD	AUD L - AMY L	0.0563633	0.0590563
AUD	AUD L - AMY R	-0.201738	-0.205255		AUD	AUD L - AMY R	0.142792	0.145462		AUD	AUD L - AMY R	0.0584821	0.0605282
AUD	AUD L - AUD R	0.14441	0.147077		AUD	AUD L - AUD R	-0.0913015	-0.0935845		AUD	AUD L - AUD R	0.0242902	0.0260098
AUD	AUD L - CB L	-0.0851235	-0.0883698		AUD	AUD L - CB L	-0.17904	-0.183639		AUD	AUD L - CB L	0.0278537	0.0305323
AUD	AUD L - CB R	-0.0401476	-0.0414004		AUD	AUD L - CB R	-0.160401	-0.16411		AUD	AUD L - CB R	-0.0186531	-0.0195635
AUD	AUD L - COA L	-0.0374608	-0.0405658		AUD	AUD L - COA L	0.0891011	0.101783		AUD	AUD L - COA L	0.0833926	0.081312
AUD	AUD L - COA R	-0.24513	-0.249776		AUD	AUD L - COA R	0.10048	0.101803		AUD	AUD L - COA R	-0.0135208	-0.0125915
AUD	AUD L - CP L	0.141974	0.152429		AUD	AUD L - CP L	0.0725638	0.0702687		AUD	AUD L - CP L	0.124202	0.125885
AUD	AUD L - CP R	0.121652	0.124506		AUD	AUD L - CP R	0.113844	0.116738		AUD	AUD L - CP R	-0.0335927	-0.0327252
AUD	AUD L - CSm L	0.0877372	0.104785		AUD	AUD L - CSm L	-0.249709	-0.269512		AUD	AUD L - CSm L	-0.0661223	-0.0818147
AUD	AUD L - CSm R	0.00659362	0.0105833		AUD	AUD L - CSm R	-0.198394	-0.207092		AUD	AUD L - CSm R	-0.107923	-0.115677
AUD	AUD L - ECT L	0.0609749	0.077534		AUD	AUD L - ECT L	0.121568	0.195271		AUD	AUD L - ECT L	-0.108637	-0.161031
AUD	AUD L - ECT R	0.126067	0.127078		AUD	AUD L - ECT R	-0.0330564	-0.032636		AUD	AUD L - ECT R	-0.0411115	-0.0417165
AUD	AUD L - ENT L	0.0850826	0.0929287		AUD	AUD L - ENT L	-0.0907865	-0.0983859		AUD	AUD L - ENT L	0.07723	0.0793662
AUD	AUD L - ENT R	-0.0339822	-0.0332629		AUD	AUD L - ENT R	0.0827945	0.0840285		AUD	AUD L - ENT R	-0.0593152	-0.0624211
AUD	AUD L - FS L	-0.0318368	-0.0214284		AUD	AUD L - FS L	0.182561	0.193882		AUD	AUD L - FS L	0.127981	0.140396
AUD	AUD L - FS R	0.0117827	0.011942		AUD	AUD L - FS R	-0.018537	-0.0187276		AUD	AUD L - FS R	-0.0495896	-0.0494823
AUD	AUD L - HIP L	0.250337	0.343528		AUD	AUD L - HIP L	0.143893	0.199033		AUD	AUD L - HIP L	0.0144419	-0.0104061
AUD	AUD L - HIP R	-0.000501413	-0.000216234		AUD	AUD L - HIP R	0.0831935	0.084211		AUD	AUD L - HIP R	-0.112585	-0.113945
AUD	AUD L - HT L	-0.202958	-0.206224		AUD	AUD L - HT L	0.110498	0.112506		AUD	AUD L - HT L	0.0368008	0.0381888
AUD	AUD L - HT R	-0.285492	-0.292278		AUD	AUD L - HT R	0.152628	0.158195		AUD	AUD L - HT R	-0.00290284	-0.00237934
AUD	AUD L - IC L	0.0713152	0.0717292		AUD	AUD L - IC L	0.0127919	0.0127788		AUD	AUD L - IC L	-0.0390851	-0.0402052
AUD	AUD L - IC R	0.0700391	0.0731161		AUD	AUD L - IC R	-0.149666	-0.153965		AUD	AUD L - IC R	-0.0832151	-0.0880054
AUD	AUD L - ILA L	-0.0710481	-0.0732448		AUD	AUD L - ILA L	0.192476	0.200332		AUD	AUD L - ILA L	-0.00113795	-0.00376349
AUD	AUD L - ILA R	-0.0619051	-0.0613081		AUD	AUD L - ILA R	0.160821	0.166016		AUD	AUD L - ILA R	-0.0409125	-0.0449452
AUD	AUD L - LSX L	0.0813447	0.0836879		AUD	AUD L - LSX L	0.0435608	0.0349334		AUD	AUD L - LSX L	-0.0284343	-0.0292737
AUD	AUD L - LSX R	0.101629	0.105861		AUD	AUD L - LSX R	0.0370283	0.0332913		AUD	AUD L - LSX R	-0.0477493	-0.0490652
AUD	AUD L - MB R	0.0190171	0.023297		AUD	AUD L - MB R	-0.0584849	-0.0638226		AUD	AUD L - MB R	-0.208924	-0.216663
AUD	AUD L - MOB R	-0.0307048	-0.0331796		AUD	AUD L - MOB R	0.271574	0.278575		AUD	AUD L - MOB R	-0.110917	-0.112176
AUD	AUD L - MRN L	0.304603	0.332184		AUD	AUD L - MRN L	-0.155343	-0.175941		AUD	AUD L - MRN L	-0.151542	-0.177354
AUD	AUD L - MRN R	0.0217209	0.0260937		AUD	AUD L - MRN R	-0.0575774	-0.062198		AUD	AUD L - MRN R	-0.185715	-0.192347
AUD	AUD L - MY L	-0.0218779	-0.0209638		AUD	AUD L - MY L	-0.230105	-0.233716		AUD	AUD L - MY L	-0.0671465	-0.0690671
AUD	AUD L - MY R	-0.0123863	-0.0112671		AUD	AUD L - MY R	-0.221975	-0.225332		AUD	AUD L - MY R	-0.0875909	-0.0902288
AUD	AUD L - NBM L	-0.13247	-0.135448		AUD	AUD L - NBM L	0.15345	0.157137		AUD	AUD L - NBM L	0.17414	0.178778
AUD	AUD L - NBM R	-0.0484503	-0.0492978		AUD	AUD L - NBM R	0.0930542	0.0939964		AUD	AUD L - NBM R	-0.0135682	-0.0142027
AUD	AUD L - OLF L	-0.0920251	-0.0971935		AUD	AUD L - OLF L	0.12196	0.128814		AUD	AUD L - OLF L	0.0027132	-0.00237115
AUD	AUD L - OLF R	-0.208823	-0.213385		AUD	AUD L - OLF R	0.235616	0.240217		AUD	AUD L - OLF R	0.0185765	0.021479
AUD	AUD L - ORB L	-0.10372	-0.110119		AUD	AUD L - ORB L	0.212036	0.220754		AUD	AUD L - ORB L	0.00142213	0.000832666
AUD	AUD L - ORB R	-0.062078	-0.0630044		AUD	AUD L - ORB R	0.246879	0.254152		AUD	AUD L - ORB R	-0.0433899	-0.0455992
AUD	AUD L - OT L	-0.0660775	-0.0700919		AUD	AUD L - OT L	0.0643637	0.0679793		AUD	AUD L - OT L	-0.0480501	-0.051782
AUD	AUD L - OT R	-0.016361	-0.0166724		AUD	AUD L - OT R	0.0856392	0.0867626		AUD	AUD L - OT R	-0.0829045	-0.0837373
AUD	AUD L - PAG L	0.192754	0.217822		AUD	AUD L - PAG L	-0.129961	-0.14873		AUD	AUD L - PAG L	-0.198364	-0.223292
AUD	AUD L - PAG R	0.135024	0.156459		AUD	AUD L - PAG R	-0.142145	-0.161711		AUD	AUD L - PAG R	-0.187894	-0.208654
AUD	AUD L - PALc L	0.0254849	0.0299657		AUD	AUD L - PALc L	0.0271878	0.0292954		AUD	AUD L - PALc L	0.123189	0.127255
AUD	AUD L - PALc R	0.0396028	0.0400904		AUD	AUD L - PALc R	-0.0230109	-0.0236113		AUD	AUD L - PALc R	-0.0772497	-0.0805321
AUD	AUD L - PALd L	0.156142	0.160626		AUD	AUD L - PALd L	0.0319396	0.0305016		AUD	AUD L - PALd L	0.0826116	0.0863861
AUD	AUD L - PALd R	0.0122794	0.0127384		AUD	AUD L - PALd R	0.0591835	0.0588918		AUD	AUD L - PALd R	-0.00768441	-0.00673583
AUD	AUD L - PALm L	-0.00671199	-0.0102478		AUD	AUD L - PALm L	0.0878638	0.0890609		AUD	AUD L - PALm L	-0.0596496	-0.0612398
AUD	AUD L - PALm R	-0.016903	-0.018223		AUD	AUD L - PALm R	0.0595951	0.0605337		AUD	AUD L - PALm R	-0.116716	-0.119678
AUD	AUD L - PALv L	-0.0800157	-0.0832362		AUD	AUD L - PALv L	0.112495	0.116798		AUD	AUD L - PALv L	0.0476999	0.0478845
AUD	AUD L - PALv R	-0.0826884	-0.0839798		AUD	AUD L - PALv R	0.104312	0.105635		AUD	AUD L - PALv R	-0.0640228	-0.0641565
AUD	AUD L - PB L	0.0743504	0.0761758		AUD	AUD L - PB L	-0.138166	-0.141033		AUD	AUD L - PB L	-0.060559	-0.0622379
AUD	AUD L - PB R	-0.0493725	-0.0517917		AUD	AUD L - PB R	-0.190816	-0.195779		AUD	AUD L - PB R	-0.142892	-0.144344
AUD	AUD L - PERI L	0.0190639	0.060986		AUD	AUD L - PERI L	-0.0102161	-0.0527865		AUD	AUD L - PERI L	-0.0758409	-0.106059
AUD	AUD L - PERI R	0.00473792	0.00448492		AUD	AUD L - PERI R	0.106251	0.107573		AUD	AUD L - PERI R	-0.0454861	-0.0456514
AUD	AUD L - PIR L	-0.0735921	-0.076104		AUD	AUD L - PIR L	0.131535	0.138054		AUD	AUD L - PIR L	0.0947817	0.0949708
AUD	AUD L - PIR R	-0.0289841	-0.0300475		AUD	AUD L - PIR R	0.152156	0.154057		AUD	AUD L - PIR R	-0.0503639	-0.0496415
AUD	AUD L - PL L	-0.138147	-0.144961		AUD	AUD L - PL L	0.196772	0.204648		AUD	AUD L - PL L	0.0609217	0.0624995
AUD	AUD L - PL R	-0.117242	-0.122266		AUD	AUD L - PL R	0.221593	0.22872		AUD	AUD L - PL R	0.0481024	0.0494704
AUD	AUD L - PRNr L	0.034751	0.0374895		AUD	AUD L - PRNr L	-0.229892	-0.244889		AUD	AUD L - PRNr L	0.0148921	0.0166666
AUD	AUD L - PRNr R	-0.0286704	-0.0355934		AUD	AUD L - PRNr R	-0.128743	-0.137473		AUD	AUD L - PRNr R	-0.130922	-0.139617
AUD	AUD L - PTLp L	0.082427	0.107431		AUD	AUD L - PTLp L	0.174794	0.27787		AUD	AUD L - PTLp L	0.00274075	0.00251554
AUD	AUD L - PTLp R	-0.0176526	-0.0235633		AUD	AUD L - PTLp R	0.158113	0.165918		AUD	AUD L - PTLp R	-0.0439249	-0.0381653
AUD	AUD L - RHP L	0.21878	0.236747		AUD	AUD L - RHP L	0.218769	0.236475		AUD	AUD L - RHP L	0.00304068	-0.000450702
AUD	AUD L - RHP R	0.0715303	0.0728565		AUD	AUD L - RHP R	0.0276976	0.0285138		AUD	AUD L - RHP R	-0.154253	-0.155842
AUD	AUD L - RSP L	-0.0672497	-0.0759715		AUD	AUD L - RSP L	0.261135	0.276504		AUD	AUD L - RSP L	-0.0790054	-0.0742544
AUD	AUD L - RSP R	-0.0333778	-0.0370699		AUD	AUD L - RSP R	0.121595	0.126402		AUD	AUD L - RSP R	-0.0731672	-0.0716322
AUD	AUD L - SC L	0.170468	0.175031		AUD	AUD L - SC L	0.0734587	0.0771448		AUD	AUD L - SC L	-0.124967	-0.128709
AUD	AUD L - SC R	0.152465	0.157608		AUD	AUD L - SC R	-0.0370038	-0.0397889		AUD	AUD L - SC R	-0.202396	-0.207832
AUD	AUD L - SN L	0.168045	0.17865		AUD	AUD L - SN L	-0.203585	-0.21475		AUD	AUD L - SN L	-0.0484387	-0.0584149
AUD	AUD L - SN R	-0.165199	-0.177605		AUD	AUD L - SN R	0.185723	0.199183		AUD	AUD L - SN R	0.0232397	0.030815
AUD	AUD L - STN L	-0.0857811	-0.0868141		AUD	AUD L - STN L	0.0210271	0.0218465		AUD	AUD L - STN L	0.0179863	0.0164053
AUD	AUD L - STN R	-0.248039	-0.253647		AUD	AUD L - STN R	0.158351	0.163497		AUD	AUD L - STN R	0.0632373	0.0661083
AUD	AUD L - TEa L	0.0232126	0.051348		AUD	AUD L - TEa L	0.0552227	0.146759		AUD	AUD L - TEa L	-0.0429038	-0.107492
AUD	AUD L - TEa R	0.12124	0.122232		AUD	AUD L - TEa R	-0.0312083	-0.0308388		AUD	AUD L - TEa R	-0.0609506	-0.0617393
AUD	AUD L - TH L	0.234357	0.239925		AUD	AUD L - TH L	-0.0584721	-0.0618749		AUD	AUD L - TH L	-0.0643127	-0.0663759
AUD	AUD L - TH R	-0.0272838	-0.0268699		AUD	AUD L - TH R	-0.00863185	-0.00949393		AUD	AUD L - TH R	-0.101966	-0.102879
AUD	AUD L - VIS L	0.150314	0.175042		AUD	AUD L - VIS L	0.250949	0.315532		AUD	AUD L - VIS L	0.0731931	0.0841367
AUD	AUD L - VIS R	0.135439	0.136497		AUD	AUD L - VIS R	0.0288689	0.0297072		AUD	AUD L - VIS R	-0.0575242	-0.0584967
AUD	AUD L - VTA L	0.0611826	0.0666216		AUD	AUD L - VTA L	-0.0326124	-0.0373503		AUD	AUD L - VTA L	-0.0500068	-0.0561952
AUD	AUD L - VTA R	-0.129535	-0.134266		AUD	AUD L - VTA R	0.0371647	0.0408706		AUD	AUD L - VTA R	-0.012732	-0.0091391
AUD	AUD L - ZI L	-0.0638988	-0.0634228		AUD	AUD L - ZI L	0.0882963	0.0889433		AUD	AUD L - ZI L	-0.0175481	-0.0179304
AUD	AUD L - ZI R	-0.259601	-0.267615		AUD	AUD L - ZI R	0.115588	0.121618		AUD	AUD L - ZI R	0.0172519	0.0206558
AUD	AUD R - ACA L	-0.196651	-0.203927		AUD	AUD R - ACA L	0.157232	0.166433		AUD	AUD R - ACA L	-0.107499	-0.111807
AUD	AUD R - ACA R	-0.200026	-0.204271		AUD	AUD R - ACA R	0.059831	0.0629284		AUD	AUD R - ACA R	-0.0958325	-0.0955971
AUD	AUD R - ACB L	0.0616378	0.0651352		AUD	AUD R - ACB L	0.0136723	0.0120902		AUD	AUD R - ACB L	-0.0497059	-0.054005
AUD	AUD R - ACB R	-0.104204	-0.105691		AUD	AUD R - ACB R	0.012429	0.0128956		AUD	AUD R - ACB R	-0.082463	-0.0848224
AUD	AUD R - AI L	-0.0868505	-0.0904084		AUD	AUD R - AI L	0.0525976	0.0540081		AUD	AUD R - AI L	-0.162253	-0.166013
AUD	AUD R - AI R	-0.182376	-0.183794		AUD	AUD R - AI R	0.0434565	0.0433095		AUD	AUD R - AI R	-0.0893957	-0.0908581
AUD	AUD R - AMY L	0.0787569	0.0790197		AUD	AUD R - AMY L	0.0504147	0.051641		AUD	AUD R - AMY L	-0.0605107	-0.0619875
AUD	AUD R - AMY R	-0.186397	-0.191415		AUD	AUD R - AMY R	0.0786668	0.0823188		AUD	AUD R - AMY R	0.0870387	0.0878341
AUD	AUD R - CB L	0.0161001	0.0182831		AUD	AUD R - CB L	0.0540795	0.0538147		AUD	AUD R - CB L	-0.000504581	0.00206911
AUD	AUD R - CB R	-0.085973	-0.0868487		AUD	AUD R - CB R	0.0341923	0.0350221		AUD	AUD R - CB R	0.174031	0.175352
AUD	AUD R - COA L	0.0426967	0.0447723		AUD	AUD R - COA L	-0.0859194	-0.0876736		AUD	AUD R - COA L	-0.13371	-0.136128
AUD	AUD R - COA R	-0.0524014	-0.0560515		AUD	AUD R - COA R	0.0179562	0.0195469		AUD	AUD R - COA R	0.125753	0.132561
AUD	AUD R - CP L	-0.0158591	-0.0176143		AUD	AUD R - CP L	0.122028	0.125759		AUD	AUD R - CP L	-0.126424	-0.130183
AUD	AUD R - CP R	-0.284744	-0.289616		AUD	AUD R - CP R	0.0614457	0.0637697		AUD	AUD R - CP R	-0.00858069	-0.00836322
AUD	AUD R - CSm L	-0.0483262	-0.0494136		AUD	AUD R - CSm L	0.024371	0.0242195		AUD	AUD R - CSm L	0.00995847	0.00984786
AUD	AUD R - CSm R	-0.0665492	-0.0685752		AUD	AUD R - CSm R	-0.0111756	-0.011242		AUD	AUD R - CSm R	0.041247	0.0423534
AUD	AUD R - ECT L	0.103409	0.105772		AUD	AUD R - ECT L	-0.167637	-0.170542		AUD	AUD R - ECT L	0.0728926	0.0753245
AUD	AUD R - ECT R	-0.0176708	-0.0451821		AUD	AUD R - ECT R	0.121644	0.214539		AUD	AUD R - ECT R	0.0304979	0.0664742
AUD	AUD R - ENT L	0.0915869	0.0936492		AUD	AUD R - ENT L	-0.106086	-0.108185		AUD	AUD R - ENT L	-0.101403	-0.103253
AUD	AUD R - ENT R	0.0909003	0.0969004		AUD	AUD R - ENT R	-0.127357	-0.13396		AUD	AUD R - ENT R	0.0106854	0.0160183
AUD	AUD R - FS L	0.0960503	0.107904		AUD	AUD R - FS L	-0.123843	-0.136451		AUD	AUD R - FS L	-0.227391	-0.241224
AUD	AUD R - FS R	-0.189711	-0.192347		AUD	AUD R - FS R	0.2078	0.210583		AUD	AUD R - FS R	0.0242331	0.0253343
AUD	AUD R - HIP L	0.299003	0.308157		AUD	AUD R - HIP L	-0.0756808	-0.0740668		AUD	AUD R - HIP L	-0.0188469	-0.022262
AUD	AUD R - HIP R	-0.00868006	-0.00804425		AUD	AUD R - HIP R	0.0101047	0.0208812		AUD	AUD R - HIP R	-0.00194076	-0.00148219
AUD	AUD R - HT L	-0.116781	-0.116829		AUD	AUD R - HT L	-0.042827	-0.0435529		AUD	AUD R - HT L	0.00192848	0.000703388
AUD	AUD R - HT R	-0.190351	-0.19189		AUD	AUD R - HT R	0.074343	0.0750146		AUD	AUD R - HT R	0.0391409	0.0393331
AUD	AUD R - IC L	0.0874404	0.0925346		AUD	AUD R - IC L	-0.0852691	-0.0891724		AUD	AUD R - IC L	0.0111832	0.0144597
AUD	AUD R - IC R	-0.243112	-0.260655		AUD	AUD R - IC R	0.112705	0.128361		AUD	AUD R - IC R	0.134669	0.147174
AUD	AUD R - ILA L	-0.132213	-0.134973		AUD	AUD R - ILA L	0.0491491	0.0490023		AUD	AUD R - ILA L	-0.0483454	-0.0505422
AUD	AUD R - ILA R	-0.188446	-0.191602		AUD	AUD R - ILA R	0.0324811	0.0327398		AUD	AUD R - ILA R	-0.00517503	-0.00406488
AUD	AUD R - LSX L	-0.110043	-0.111464		AUD	AUD R - LSX L	-0.0617553	-0.062138		AUD	AUD R - LSX L	0.103784	0.105267
AUD	AUD R - LSX R	-0.24239	-0.248254		AUD	AUD R - LSX R	-0.0988525	-0.10441		AUD	AUD R - LSX R	0.149347	0.155043
AUD	AUD R - MB R	0.048761	0.048799		AUD	AUD R - MB R	0.0406157	0.0414932		AUD	AUD R - MB R	0.0109234	0.0112611
AUD	AUD R - MOB R	0.0354845	0.0349936		AUD	AUD R - MOB R	0.077174	0.0783728		AUD	AUD R - MOB R	-0.197168	-0.199196
AUD	AUD R - MRN L	0.148989	0.160479		AUD	AUD R - MRN L	-0.00705175	0.0012764		AUD	AUD R - MRN L	-0.0502668	-0.0590248
AUD	AUD R - MRN R	0.00749884	0.00769661		AUD	AUD R - MRN R	0.0242776	0.0251026		AUD	AUD R - MRN R	-0.0189047	-0.0196699
AUD	AUD R - MY L	0.0158172	0.0164754		AUD	AUD R - MY L	-0.0677681	-0.0688509		AUD	AUD R - MY L	-0.000566662	-0.00142688
AUD	AUD R - MY R	0.0142721	0.0146415		AUD	AUD R - MY R	-0.101239	-0.102101		AUD	AUD R - MY R	-0.0178083	-0.018313
AUD	AUD R - NBM L	-0.0369798	-0.0360471		AUD	AUD R - NBM L	-0.0689121	-0.0705503		AUD	AUD R - NBM L	-0.11118	-0.115158
AUD	AUD R - NBM R	-0.0971598	-0.0981063		AUD	AUD R - NBM R	0.198377	0.199851		AUD	AUD R - NBM R	-0.0327436	-0.0335699
AUD	AUD R - OLF L	0.0435683	0.0456362		AUD	AUD R - OLF L	-0.0448341	-0.0461704		AUD	AUD R - OLF L	-0.0961994	-0.0991844
AUD	AUD R - OLF R	-0.104118	-0.105986		AUD	AUD R - OLF R	0.00842317	0.00925538		AUD	AUD R - OLF R	0.0537255	0.0551936
AUD	AUD R - ORB L	-0.0499657	-0.0507452		AUD	AUD R - ORB L	0.0861104	0.0875028		AUD	AUD R - ORB L	-0.104618	-0.106995
AUD	AUD R - ORB R	-0.129431	-0.13081		AUD	AUD R - ORB R	0.0442114	0.0448983		AUD	AUD R - ORB R	-0.113375	-0.115737
AUD	AUD R - OT L	0.123456	0.128614		AUD	AUD R - OT L	-0.0827136	-0.0874613		AUD	AUD R - OT L	-0.0870124	-0.0921206
AUD	AUD R - OT R	0.0325826	0.0306528		AUD	AUD R - OT R	0.117205	0.121863		AUD	AUD R - OT R	-0.171167	-0.178112
AUD	AUD R - PAG L	0.142404	0.147943		AUD	AUD R - PAG L	-0.0182277	-0.0107571		AUD	AUD R - PAG L	-0.023312	-0.0306538
AUD	AUD R - PAG R	0.0310646	0.0337654		AUD	AUD R - PAG R	0.0602648	0.0630529		AUD	AUD R - PAG R	-0.00856537	-0.0113449
AUD	AUD R - PALc L	-0.098975	-0.0936702		AUD	AUD R - PALc L	-0.059162	-0.0660471		AUD	AUD R - PALc L	-0.0316111	-0.0383791
AUD	AUD R - PALc R	-0.27731	-0.283895		AUD	AUD R - PALc R	0.108747	0.109194		AUD	AUD R - PALc R	0.0587461	0.0615052
AUD	AUD R - PALd L	-0.038081	-0.0401849		AUD	AUD R - PALd L	0.0242428	0.0259446		AUD	AUD R - PALd L	-0.0659419	-0.0688006
AUD	AUD R - PALd R	-0.150856	-0.156593		AUD	AUD R - PALd R	0.000919991	0.00463664		AUD	AUD R - PALd R	-0.0722119	-0.0761745
AUD	AUD R - PALm L	-0.0259524	-0.0211461		AUD	AUD R - PALm L	-0.0522076	-0.0573048		AUD	AUD R - PALm L	-0.00426049	-0.00991088
AUD	AUD R - PALm R	-0.0767441	-0.0790957		AUD	AUD R - PALm R	0.102264	0.104832		AUD	AUD R - PALm R	-0.0217636	-0.0241372
AUD	AUD R - PALv L	0.0351059	0.0434834		AUD	AUD R - PALv L	-0.072052	-0.0806879		AUD	AUD R - PALv L	-0.106254	-0.117306
AUD	AUD R - PALv R	-0.130257	-0.132026		AUD	AUD R - PALv R	0.147497	0.148898		AUD	AUD R - PALv R	-0.048637	-0.0491384
AUD	AUD R - PB L	0.0823174	0.0857845		AUD	AUD R - PB L	-0.00023961	0.00526736		AUD	AUD R - PB L	-0.0520144	-0.05786
AUD	AUD R - PB R	-0.0199311	-0.0200449		AUD	AUD R - PB R	0.0805658	0.0814135		AUD	AUD R - PB R	0.00841931	0.00816844
AUD	AUD R - PERI L	0.109481	0.11137		AUD	AUD R - PERI L	-0.125137	-0.127157		AUD	AUD R - PERI L	0.051505	0.0531556
AUD	AUD R - PERI R	0.167195	0.225712		AUD	AUD R - PERI R	-0.0436057	-0.0524841		AUD	AUD R - PERI R	0.0451562	0.0553496
AUD	AUD R - PIR L	0.034091	0.035995		AUD	AUD R - PIR L	-0.0658713	-0.0676025		AUD	AUD R - PIR L	-0.194773	-0.198732
AUD	AUD R - PIR R	-0.0505977	-0.0510823		AUD	AUD R - PIR R	0.0274841	0.0277749		AUD	AUD R - PIR R	-0.0663095	-0.0664227
AUD	AUD R - PL L	-0.129717	-0.132035		AUD	AUD R - PL L	0.10705	0.108715		AUD	AUD R - PL L	-0.0478038	-0.0482905
AUD	AUD R - PL R	-0.14257	-0.145037		AUD	AUD R - PL R	0.0426372	0.0430845		AUD	AUD R - PL R	-0.0649855	-0.065124
AUD	AUD R - PRNr L	0.0119989	0.0156572		AUD	AUD R - PRNr L	-0.0846024	-0.0895147		AUD	AUD R - PRNr L	-0.0245975	-0.0289203
AUD	AUD R - PRNr R	-0.0278791	-0.0258016		AUD	AUD R - PRNr R	-0.00923901	-0.0107993		AUD	AUD R - PRNr R	0.0405586	0.0388131
AUD	AUD R - PTLp L	0.261901	0.267279		AUD	AUD R - PTLp L	-0.123328	-0.122433		AUD	AUD R - PTLp L	-0.0321645	-0.0352924
AUD	AUD R - PTLp R	-0.114197	-0.163368		AUD	AUD R - PTLp R	0.0971383	0.138146		AUD	AUD R - PTLp R	-0.138258	-0.187266
AUD	AUD R - RHP L	0.115426	0.117496		AUD	AUD R - RHP L	-0.158876	-0.163053		AUD	AUD R - RHP L	-0.0315977	-0.0306958
AUD	AUD R - RHP R	-0.22309	-0.262753		AUD	AUD R - RHP R	0.176409	0.216132		AUD	AUD R - RHP R	0.033351	0.0520447
AUD	AUD R - RSP L	0.0414335	0.0419353		AUD	AUD R - RSP L	-0.149636	-0.152303		AUD	AUD R - RSP L	-0.0773959	-0.0797688
AUD	AUD R - RSP R	-0.124532	-0.133994		AUD	AUD R - RSP R	0.0187516	0.014362		AUD	AUD R - RSP R	-0.0903992	-0.0967251
AUD	AUD R - SC L	0.153829	0.159103		AUD	AUD R - SC L	-0.111289	-0.109468		AUD	AUD R - SC L	-0.075041	-0.0800245
AUD	AUD R - SC R	-0.141994	-0.147832		AUD	AUD R - SC R	0.0896478	0.0934351		AUD	AUD R - SC R	-0.0203281	-0.0190275
AUD	AUD R - SN L	0.039555	0.0401004		AUD	AUD R - SN L	0.00482042	0.00512517		AUD	AUD R - SN L	0.0346021	0.0345324
AUD	AUD R - SN R	-0.025682	-0.0231966		AUD	AUD R - SN R	-0.12915	-0.138143		AUD	AUD R - SN R	-0.0669002	-0.0700547
AUD	AUD R - STN L	0.0618156	0.062166		AUD	AUD R - STN L	-0.115776	-0.11726		AUD	AUD R - STN L	-0.105514	-0.106891
AUD	AUD R - STN R	-0.227309	-0.231907		AUD	AUD R - STN R	0.0125107	0.0123615		AUD	AUD R - STN R	0.104168	0.105884
AUD	AUD R - TEa L	0.0773357	0.0790807		AUD	AUD R - TEa L	-0.163919	-0.166026		AUD	AUD R - TEa L	0.0788844	0.0806627
AUD	AUD R - TEa R	-0.0483262	-0.0948974		AUD	AUD R - TEa R	0.132885	0.300854		AUD	AUD R - TEa R	-0.040627	-0.0485242
AUD	AUD R - TH L	0.179927	0.187074		AUD	AUD R - TH L	-0.0501492	-0.0492791		AUD	AUD R - TH L	-0.0808973	-0.0848608
AUD	AUD R - TH R	-0.0667428	-0.0706701		AUD	AUD R - TH R	-0.00946073	-0.0133257		AUD	AUD R - TH R	0.118844	0.123295
AUD	AUD R - VIS L	0.17804	0.182343		AUD	AUD R - VIS L	-0.257022	-0.261924		AUD	AUD R - VIS L	-0.0302815	-0.02989
AUD	AUD R - VIS R	-0.228556	-0.289195		AUD	AUD R - VIS R	0.106695	0.131901		AUD	AUD R - VIS R	0.0193695	0.0220434
AUD	AUD R - VTA L	-0.121392	-0.123271		AUD	AUD R - VTA L	0.000344251	-0.000584725		AUD	AUD R - VTA L	0.0314076	0.0325725
AUD	AUD R - VTA R	-0.0331157	-0.0327121		AUD	AUD R - VTA R	0.0152886	0.0146161		AUD	AUD R - VTA R	-0.0866659	-0.0878933
AUD	AUD R - ZI L	0.0169176	0.01756		AUD	AUD R - ZI L	-0.0779103	-0.0789018		AUD	AUD R - ZI L	-0.0708169	-0.0720536
AUD	AUD R - ZI R	-0.173044	-0.17692		AUD	AUD R - ZI R	0.0548347	0.0545281		AUD	AUD R - ZI R	0.108612	0.110814
CB	CB L - CB R	0.151158	0.182947		CB	CB L - CB R	0.0887449	0.111335		CB	CB L - CB R	-0.0257939	-0.0460579
CB	CB L - COA L	-0.140538	-0.146042		CB	CB L - COA L	0.0716306	0.072947		CB	CB L - COA L	0.159948	0.166187
CB	CB L - COA R	-0.00235509	-0.00431495		CB	CB L - COA R	-0.0182773	-0.0195749		CB	CB L - COA R	-0.0595597	-0.060114
CB	CB L - CSm L	-0.0888749	-0.0912804		CB	CB L - CSm L	0.245643	0.251463		CB	CB L - CSm L	-0.0273357	-0.0260841
CB	CB L - CSm R	-0.0312825	-0.035973		CB	CB L - CSm R	0.195928	0.202737		CB	CB L - CSm R	-0.0190064	-0.0157087
CB	CB L - MRN L	-0.152206	-0.152953		CB	CB L - MRN L	0.183947	0.187304		CB	CB L - MRN L	-0.0560075	-0.0579067
CB	CB L - MRN R	-0.00628918	-0.00645973		CB	CB L - MRN R	0.0104757	0.00362378		CB	CB L - MRN R	0.0800988	0.0982693
CB	CB L - MY L	-0.119321	-0.124487		CB	CB L - MY L	0.273576	0.282889		CB	CB L - MY L	-0.000600478	0.00373709
CB	CB L - MY R	-0.0778	-0.0792581		CB	CB L - MY R	0.270592	0.2777		CB	CB L - MY R	-0.0252357	-0.0249248
CB	CB L - NBM L	0.0837539	0.0832563		CB	CB L - NBM L	-0.044044	-0.0455175		CB	CB L - NBM L	0.0951696	0.0997984
CB	CB L - NBM R	0.186987	0.191611		CB	CB L - NBM R	-0.00281807	-0.00322429		CB	CB L - NBM R	-0.0752396	-0.0771348
CB	CB L - OLF L	-0.1042	-0.109249		CB	CB L - OLF L	0.093377	0.0977833		CB	CB L - OLF L	0.077165	0.07909
CB	CB L - OLF R	0.0719181	0.0752965		CB	CB L - OLF R	-0.0128373	-0.011281		CB	CB L - OLF R	-0.0420578	-0.0456067
CB	CB L - PAG L	-0.0662219	-0.0667577		CB	CB L - PAG L	0.181422	0.19358		CB	CB L - PAG L	-0.130419	-0.142761
CB	CB L - PAG R	-0.0108159	-0.00885456		CB	CB L - PAG R	0.146662	0.150158		CB	CB L - PAG R	-0.0386058	-0.0407884
CB	CB L - PB L	-0.067076	-0.0738223		CB	CB L - PB L	0.00924528	-0.0026137		CB	CB L - PB L	-0.0194923	-0.0306848
CB	CB L - PB R	0.145545	0.148892		CB	CB L - PB R	0.0607523	0.0622611		CB	CB L - PB R	0.0252041	0.0311501
CB	CB L - PRNr L	-0.247281	-0.255675		CB	CB L - PRNr L	0.220719	0.228266		CB	CB L - PRNr L	0.00230651	0.0042806
CB	CB L - PRNr R	0.0190625	0.019279		CB	CB L - PRNr R	0.0192606	0.0201943		CB	CB L - PRNr R	0.000191351	-0.000197413
CB	CB L - RHP L	-0.254269	-0.264698		CB	CB L - RHP L	-0.00168078	-0.00425232		CB	CB L - RHP L	-0.0314107	-0.0388162
CB	CB L - RHP R	-0.0366741	-0.0591545		CB	CB L - RHP R	0.0844806	0.113129		CB	CB L - RHP R	0.0297193	0.0564422
CB	CB L - SN L	-0.11051	-0.112525		CB	CB L - SN L	0.07444	0.0779287		CB	CB L - SN L	-0.0717287	-0.0740163
CB	CB L - SN R	-0.0649836	-0.0771261		CB	CB L - SN R	-0.00522197	-0.00973504		CB	CB L - SN R	0.059214	0.0674444
CB	CB L - STN L	-0.037287	-0.0375445		CB	CB L - STN L	0.0813192	0.0824805		CB	CB L - STN L	0.0610717	0.0618555
CB	CB L - STN R	0.0534939	0.0579718		CB	CB L - STN R	-0.115298	-0.125945		CB	CB L - STN R	0.0350905	0.0372465
CB	CB L - VTA L	-0.134482	-0.140191		CB	CB L - VTA L	0.0876992	0.0897953		CB	CB L - VTA L	0.0812947	0.0850936
CB	CB L - VTA R	0.0418136	0.039115		CB	CB L - VTA R	0.00741929	0.00672519		CB	CB L - VTA R	-0.0175732	-0.0173872
CB	CB L - ZI L	-0.0741505	-0.0761221		CB	CB L - ZI L	0.0505858	0.0509739		CB	CB L - ZI L	0.101297	0.104692
CB	CB L - ZI R	0.0329157	0.0370485		CB	CB L - ZI R	-0.1564	-0.175187		CB	CB L - ZI R	-0.0414674	-0.0423843
CB	CB R - COA L	0.042024	0.0410837		CB	CB R - COA L	-0.127668	-0.13077		CB	CB R - COA L	-0.0236988	-0.0263654
CB	CB R - COA R	-0.0793515	-0.0859313		CB	CB R - COA R	0.162553	0.17518		CB	CB R - COA R	-0.145617	-0.157845
CB	CB R - CSm L	0.0602963	0.0612609		CB	CB R - CSm L	0.171295	0.175041		CB	CB R - CSm L	0.0353754	0.0368825
CB	CB R - CSm R	0.00779731	0.00714417		CB	CB R - CSm R	0.195159	0.197259		CB	CB R - CSm R	-0.00569228	-0.00443813
CB	CB R - MRN L	0.0609066	0.0642679		CB	CB R - MRN L	0.0490682	0.0500676		CB	CB R - MRN L	0.0494408	0.0540313
CB	CB R - MRN R	-0.0474964	-0.0491108		CB	CB R - MRN R	-0.00293857	-0.00553633		CB	CB R - MRN R	-0.0501797	-0.0491009
CB	CB R - MY L	0.135954	0.137716		CB	CB R - MY L	0.0673316	0.0680606		CB	CB R - MY L	-0.00442532	-0.00491955
CB	CB R - MY R	0.112158	0.113029		CB	CB R - MY R	0.0191516	0.0191747		CB	CB R - MY R	0.0173687	0.0174785
CB	CB R - NBM L	0.0162428	0.0166585		CB	CB R - NBM L	-0.0549923	-0.0554911		CB	CB R - NBM L	-0.0201649	-0.0205959
CB	CB R - NBM R	-0.00898542	-0.0125098		CB	CB R - NBM R	0.0889967	0.094117		CB	CB R - NBM R	-0.0175947	-0.0193489
CB	CB R - OLF L	-0.104027	-0.108161		CB	CB R - OLF L	0.0951836	0.0992175		CB	CB R - OLF L	-0.0388177	-0.042763
CB	CB R - OLF R	-0.025817	-0.0295303		CB	CB R - OLF R	0.151279	0.15673		CB	CB R - OLF R	-0.118571	-0.123329
CB	CB R - PAG L	0.128971	0.132817		CB	CB R - PAG L	0.0181604	0.0153594		CB	CB R - PAG L	0.0401012	0.0430021
CB	CB R - PAG R	0.0559772	0.0590218		CB	CB R - PAG R	-0.0121568	-0.0138888		CB	CB R - PAG R	0.0380857	0.0417307
CB	CB R - PB L	0.216363	0.223529		CB	CB R - PB L	-0.0148075	-0.0160756		CB	CB R - PB L	0.0347509	0.0351743
CB	CB R - PB R	0.0607778	0.0693395		CB	CB R - PB R	0.00630356	0.0140577		CB	CB R - PB R	-0.0592374	-0.0684793
CB	CB R - PRNr L	0.124652	0.125547		CB	CB R - PRNr L	0.0114758	0.0106625		CB	CB R - PRNr L	-0.0227722	-0.02219
CB	CB R - PRNr R	0.0173823	0.0179261		CB	CB R - PRNr R	0.058915	0.0595448		CB	CB R - PRNr R	-0.0528664	-0.0535512
CB	CB R - RHP L	0.033545	0.0373131		CB	CB R - RHP L	0.0161303	0.0173837		CB	CB R - RHP L	0.0266345	0.0280692
CB	CB R - RHP R	-0.147256	-0.154804		CB	CB R - RHP R	-0.00432771	-0.00362995		CB	CB R - RHP R	0.124725	0.132463
CB	CB R - SN L	-0.0069155	-0.00631829		CB	CB R - SN L	0.11778	0.121052		CB	CB R - SN L	0.0640444	0.0687573
CB	CB R - SN R	-0.0121692	-0.0200957		CB	CB R - SN R	0.00518688	0.00745725		CB	CB R - SN R	-0.187202	-0.195122
CB	CB R - STN L	-0.104104	-0.107272		CB	CB R - STN L	-0.113615	-0.120801		CB	CB R - STN L	0.141311	0.148532
CB	CB R - STN R	-0.0709984	-0.0772412		CB	CB R - STN R	0.104697	0.1057		CB	CB R - STN R	-0.0299383	-0.0283475
CB	CB R - VTA L	-0.128452	-0.137435		CB	CB R - VTA L	0.0659768	0.06718		CB	CB R - VTA L	0.0483556	0.0485723
CB	CB R - VTA R	-0.0754951	-0.0914175		CB	CB R - VTA R	0.0545089	0.0619493		CB	CB R - VTA R	-0.0768205	-0.0866396
CB	CB R - ZI L	-0.0889622	-0.0934048		CB	CB R - ZI L	-0.0620768	-0.0671223		CB	CB R - ZI L	0.0543466	0.0589125
CB	CB R - ZI R	-0.182425	-0.204671		CB	CB R - ZI R	0.135776	0.143369		CB	CB R - ZI R	-0.0312596	-0.0348346
COA	COA L - COA R	0.0787835	0.0801273		COA	COA L - COA R	-0.0689454	-0.0709349		COA	COA L - COA R	0.0328987	0.0335749
COA	COA L - CSm L	-0.13756	-0.138303		COA	COA L - CSm L	-0.0123886	-0.0123602		COA	COA L - CSm L	-0.0899241	-0.0922709
COA	COA L - CSm R	-0.0607495	-0.0636182		COA	COA L - CSm R	-0.0187153	-0.0199282		COA	COA L - CSm R	0.0201239	0.0216753
COA	COA L - MY L	0.103618	0.106247		COA	COA L - MY L	-0.117774	-0.12043		COA	COA L - MY L	-0.168589	-0.173573
COA	COA L - MY R	0.06532	0.0659067		COA	COA L - MY R	-0.0774921	-0.0780548		COA	COA L - MY R	-0.145898	-0.148875
COA	COA L - PRNr L	-0.14628	-0.154541		COA	COA L - PRNr L	-0.00252884	-0.00368079		COA	COA L - PRNr L	-0.0761421	-0.0862427
COA	COA L - PRNr R	0.00899399	0.00732047		COA	COA L - PRNr R	-0.0197568	-0.0179326		COA	COA L - PRNr R	-0.00062702	-3.06429e-05
COA	COA L - SN L	0.0491424	0.0520802		COA	COA L - SN L	0.169093	0.184643		COA	COA L - SN L	-0.156035	-0.171274
COA	COA L - SN R	-0.104921	-0.106567		COA	COA L - SN R	-0.126353	-0.131964		COA	COA L - SN R	0.0412296	0.042248
COA	COA L - STN L	0.143678	0.173865		COA	COA L - STN L	-0.046599	-0.0652887		COA	COA L - STN L	-0.0732121	-0.0792485
COA	COA L - STN R	0.188909	0.192203		COA	COA L - STN R	-0.22597	-0.22892		COA	COA L - STN R	0.071266	0.0721906
COA	COA L - ZI L	0.093564	0.111707		COA	COA L - ZI L	-0.123707	-0.14949		COA	COA L - ZI L	-0.0742796	-0.08418
COA	COA L - ZI R	0.268676	0.275456		COA	COA L - ZI R	-0.105615	-0.107447		COA	COA L - ZI R	-0.0138142	-0.0133985
COA	COA R - CSm L	-0.0139397	-0.0126456		COA	COA R - CSm L	-0.115901	-0.117649		COA	COA R - CSm L	0.0536969	0.053177
COA	COA R - CSm R	0.00690388	0.00653649		COA	COA R - CSm R	-0.0841646	-0.0854403		COA	COA R - CSm R	0.00750132	0.00738321
COA	COA R - MY L	-0.12125	-0.123764		COA	COA R - MY L	-0.100627	-0.103722		COA	COA R - MY L	-0.00760902	-0.00998431
COA	COA R - MY R	-0.088288	-0.0910314		COA	COA R - MY R	-0.0882655	-0.0912915		COA	COA R - MY R	-0.0359403	-0.0388189
COA	COA R - PRNr L	-0.00209846	-0.00372453		COA	COA R - PRNr L	-0.0765429	-0.0816982		COA	COA R - PRNr L	0.00811114	0.0118028
COA	COA R - PRNr R	-0.0831374	-0.0868183		COA	COA R - PRNr R	0.00885496	0.0053187		COA	COA R - PRNr R	-0.0448293	-0.0490065
COA	COA R - SN L	-0.0176439	-0.0175461		COA	COA R - SN L	-0.0915042	-0.0919069		COA	COA R - SN L	0.0318159	0.0320829
COA	COA R - SN R	0.0117978	0.0183382		COA	COA R - SN R	-0.00415269	-0.00950952		COA	COA R - SN R	-0.0291866	-0.028372
COA	COA R - STN L	-0.054841	-0.0557855		COA	COA R - STN L	-0.0390467	-0.0389243		COA	COA R - STN L	0.0271914	0.0270522
COA	COA R - STN R	-0.0694956	-0.0984333		COA	COA R - STN R	0.0166169	0.0228228		COA	COA R - STN R	-0.0558967	-0.0738612
COA	COA R - ZI L	-0.0408819	-0.0411938		COA	COA R - ZI L	-0.000652866	-0.000875882		COA	COA R - ZI L	0.0841459	0.0846668
COA	COA R - ZI R	-0.0429629	-0.0640239		COA	COA R - ZI R	-0.0188437	-0.0250323		COA	COA R - ZI R	-0.0411879	-0.0582206
CP	CP L - ACB L	0.0439134	0.0572423		CP	CP L - ACB L	0.00144443	0.00777907		CP	CP L - ACB L	-0.0343485	-0.0534809
CP	CP L - ACB R	0.0199416	0.0217602		CP	CP L - ACB R	-0.149183	-0.15449		CP	CP L - ACB R	0.0293155	0.0313497
CP	CP L - AMY L	-0.0968377	-0.103953		CP	CP L - AMY L	0.121401	0.12645		CP	CP L - AMY L	-0.0940909	-0.0954367
CP	CP L - AMY R	0.0623079	0.0636853		CP	CP L - AMY R	-0.0566258	-0.0577715		CP	CP L - AMY R	0.0728873	0.0740605
CP	CP L - CB L	0.10336	0.109222		CP	CP L - CB L	-0.0396526	-0.0370713		CP	CP L - CB L	0.172999	0.178774
CP	CP L - CB R	0.0419697	0.042588		CP	CP L - CB R	-0.0379529	-0.0383421		CP	CP L - CB R	0.102245	0.102972
CP	CP L - COA L	0.0184739	0.0182454		CP	CP L - COA L	-0.0403851	-0.0402243		CP	CP L - COA L	-0.103969	-0.105588
CP	CP L - COA R	-0.0267019	-0.0269178		CP	CP L - COA R	0.0578102	0.0580356		CP	CP L - COA R	0.030823	0.0307253
CP	CP L - CP R	-0.0217773	-0.019514		CP	CP L - CP R	-0.0530105	-0.0568068		CP	CP L - CP R	0.0526212	0.054418
CP	CP L - CSm L	0.174089	0.178896		CP	CP L - CSm L	0.0340288	0.0367028		CP	CP L - CSm L	0.00182727	0.00227911
CP	CP L - CSm R	0.0863425	0.0871372		CP	CP L - CSm R	0.128154	0.132704		CP	CP L - CSm R	0.0253627	0.025185
CP	CP L - FS L	-0.0481884	-0.065956		CP	CP L - FS L	0.062763	0.0843168		CP	CP L - FS L	-0.00464714	-0.0104208
CP	CP L - FS R	0.0772553	0.0813809		CP	CP L - FS R	-0.0724508	-0.0767435		CP	CP L - FS R	0.0971359	0.101521
CP	CP L - HT L	-0.0948983	-0.0963195		CP	CP L - HT L	0.0780171	0.0791602		CP	CP L - HT L	0.0051095	0.00452807
CP	CP L - HT R	-0.0538404	-0.0546479		CP	CP L - HT R	0.0106258	0.0110077		CP	CP L - HT R	0.117117	0.117944
CP	CP L - IC L	0.151651	0.158962		CP	CP L - IC L	0.016344	0.014495		CP	CP L - IC L	0.0437548	0.0430285
CP	CP L - IC R	-0.076794	-0.0803155		CP	CP L - IC R	0.0268966	0.0292371		CP	CP L - IC R	-0.00682732	-0.00910204
CP	CP L - LSX L	-0.00267471	-0.00822505		CP	CP L - LSX L	-0.156199	-0.163022		CP	CP L - LSX L	-0.0668643	-0.0792731
CP	CP L - LSX R	-0.0112416	-0.0134372		CP	CP L - LSX R	-0.228358	-0.236312		CP	CP L - LSX R	-0.0713556	-0.0751945
CP	CP L - MB R	-0.0278064	-0.0254915		CP	CP L - MB R	0.057739	0.0626893		CP	CP L - MB R	-0.0653771	-0.0715634
CP	CP L - MRN L	0.231105	0.249946		CP	CP L - MRN L	0.00821946	0.00206997		CP	CP L - MRN L	-0.0722116	-0.0768123
CP	CP L - MRN R	0.00858984	0.0073621		CP	CP L - MRN R	0.132714	0.144154		CP	CP L - MRN R	-0.0942727	-0.0986966
CP	CP L - MY L	0.0459318	0.0460231		CP	CP L - MY L	0.0357248	0.0372365		CP	CP L - MY L	-0.0350944	-0.03537
CP	CP L - MY R	0.0266741	0.0268595		CP	CP L - MY R	-0.0131221	-0.0132402		CP	CP L - MY R	0.00404877	0.00425524
CP	CP L - NBM L	-0.120417	-0.135693		CP	CP L - NBM L	-0.0516928	-0.0629941		CP	CP L - NBM L	0.0144109	0.00653592
CP	CP L - NBM R	0.0337641	0.0362925		CP	CP L - NBM R	-0.127749	-0.131335		CP	CP L - NBM R	0.139566	0.143091
CP	CP L - OLF L	-0.0237194	-0.0241724		CP	CP L - OLF L	0.0586581	0.0604108		CP	CP L - OLF L	-0.171599	-0.17451
CP	CP L - OLF R	-0.0525923	-0.0529622		CP	CP L - OLF R	0.0360239	0.0363105		CP	CP L - OLF R	0.00522332	0.00425563
CP	CP L - OT L	0.0264841	0.0253522		CP	CP L - OT L	-0.0210765	-0.0198612		CP	CP L - OT L	-0.0368727	-0.0433687
CP	CP L - OT R	0.0407905	0.0443057		CP	CP L - OT R	-0.119485	-0.123711		CP	CP L - OT R	0.0639395	0.0673613
CP	CP L - PAG L	0.21413	0.236485		CP	CP L - PAG L	0.0295559	0.0238334		CP	CP L - PAG L	-0.0326322	-0.0327917
CP	CP L - PAG R	0.178454	0.188877		CP	CP L - PAG R	0.0560917	0.0574042		CP	CP L - PAG R	-0.0474913	-0.0491222
CP	CP L - PALc L	-0.0807837	-0.109364		CP	CP L - PALc L	-0.100309	-0.120531		CP	CP L - PALc L	-0.0104214	-0.0303521
CP	CP L - PALc R	0.0365503	0.0375045		CP	CP L - PALc R	-0.115347	-0.116771		CP	CP L - PALc R	0.0453317	0.0466606
CP	CP L - PALd L	-0.0209565	-0.0163502		CP	CP L - PALd L	0.0411111	0.0589576		CP	CP L - PALd L	0.0163899	0.0281047
CP	CP L - PALd R	0.075154	0.0762361		CP	CP L - PALd R	-0.117661	-0.119069		CP	CP L - PALd R	0.000799423	0.00147311
CP	CP L - PALm L	0.00234633	-0.0022144		CP	CP L - PALm L	-0.106445	-0.103571		CP	CP L - PALm L	-0.0523434	-0.0575267
CP	CP L - PALm R	0.0122605	0.0123785		CP	CP L - PALm R	-0.134894	-0.135539		CP	CP L - PALm R	0.0351327	0.0354437
CP	CP L - PALv L	-0.0486043	-0.0663315		CP	CP L - PALv L	0.0460463	0.0624345		CP	CP L - PALv L	-0.0594243	-0.077493
CP	CP L - PALv R	0.0788448	0.084432		CP	CP L - PALv R	-0.119289	-0.125462		CP	CP L - PALv R	0.092091	0.0981965
CP	CP L - PB L	0.129324	0.137372		CP	CP L - PB L	0.101517	0.104536		CP	CP L - PB L	0.0101799	0.0165228
CP	CP L - PB R	-0.0284953	-0.029672		CP	CP L - PB R	0.149914	0.154507		CP	CP L - PB R	-0.0302376	-0.0328412
CP	CP L - PRNr L	0.173042	0.181396		CP	CP L - PRNr L	0.029266	0.0359283		CP	CP L - PRNr L	0.0229985	0.0273527
CP	CP L - PRNr R	-0.0413203	-0.0435383		CP	CP L - PRNr R	0.092273	0.0958852		CP	CP L - PRNr R	0.0504601	0.0474701
CP	CP L - RHP L	0.15059	0.152417		CP	CP L - RHP L	0.101923	0.103329		CP	CP L - RHP L	-0.0399236	-0.0404638
CP	CP L - RHP R	-0.186154	-0.194449		CP	CP L - RHP R	0.0906409	0.0973769		CP	CP L - RHP R	0.0247197	0.0194846
CP	CP L - SC L	0.150707	0.153966		CP	CP L - SC L	0.0844002	0.0890318		CP	CP L - SC L	-0.111218	-0.117619
CP	CP L - SC R	0.0232714	0.0230766		CP	CP L - SC R	0.097824	0.0993523		CP	CP L - SC R	-0.0841349	-0.0852666
CP	CP L - SN L	0.0661435	0.0667239		CP	CP L - SN L	0.0529672	0.0537301		CP	CP L - SN L	-0.0787758	-0.0800548
CP	CP L - SN R	-0.0444098	-0.0462513		CP	CP L - SN R	-0.00288266	-0.00189458		CP	CP L - SN R	-0.000963136	-1.76837e-06
CP	CP L - STN L	-0.0563988	-0.0564824		CP	CP L - STN L	0.07212	0.0727092		CP	CP L - STN L	0.00250578	0.00223873
CP	CP L - STN R	0.038279	0.0385794		CP	CP L - STN R	0.0167664	0.0165088		CP	CP L - STN R	-0.0159879	-0.0162104
CP	CP L - TH L	0.0830834	0.0835852		CP	CP L - TH L	-0.0240666	-0.023745		CP	CP L - TH L	0.00226283	0.00195409
CP	CP L - TH R	-0.0203813	-0.0201166		CP	CP L - TH R	0.0120165	0.00903201		CP	CP L - TH R	-0.0252558	-0.0278018
CP	CP L - VTA L	0.00789547	0.00670785		CP	CP L - VTA L	0.0965533	0.0985838		CP	CP L - VTA L	-0.0733852	-0.0749158
CP	CP L - VTA R	0.0190463	0.0180501		CP	CP L - VTA R	0.121232	0.122789		CP	CP L - VTA R	0.0258788	0.0264857
CP	CP L - ZI L	-0.000127226	-5.52945e-05		CP	CP L - ZI L	0.0425281	0.0427514		CP	CP L - ZI L	-0.0377845	-0.0379649
CP	CP L - ZI R	0.00572118	0.00623587		CP	CP L - ZI R	0.026586	0.0264465		CP	CP L - ZI R	0.0563191	0.0563793
CP	CP R - ACB L	-0.0383468	-0.041483		CP	CP R - ACB L	0.00569279	-0.00282597		CP	CP R - ACB L	0.067379	0.080419
CP	CP R - ACB R	0.0793595	0.129663		CP	CP R - ACB R	-0.00415533	0.021811		CP	CP R - ACB R	-0.0663751	-0.129087
CP	CP R - AMY L	-0.202996	-0.205834		CP	CP R - AMY L	0.0495164	0.0501494		CP	CP R - AMY L	0.00688289	0.0065846
CP	CP R - AMY R	0.044286	0.0517674		CP	CP R - AMY R	-0.0943859	-0.114467		CP	CP R - AMY R	-0.074276	-0.0833855
CP	CP R - CB L	0.0538371	0.0535136		CP	CP R - CB L	-0.0378773	-0.039126		CP	CP R - CB L	0.0134005	0.0140058
CP	CP R - CB R	0.0668639	0.0695157		CP	CP R - CB R	0.145935	0.148027		CP	CP R - CB R	0.0484762	0.050414
CP	CP R - COA L	-0.0134714	-0.0137033		CP	CP R - COA L	0.0447772	0.045202		CP	CP R - COA L	0.0108334	0.0114325
CP	CP R - COA R	0.0320433	0.0353545		CP	CP R - COA R	-0.0769234	-0.083519		CP	CP R - COA R	-0.11002	-0.115923
CP	CP R - CSm L	-0.104226	-0.10835		CP	CP R - CSm L	0.0445894	0.0475367		CP	CP R - CSm L	0.0370088	0.0404446
CP	CP R - CSm R	-0.067963	-0.0706194		CP	CP R - CSm R	0.0395213	0.0415972		CP	CP R - CSm R	0.0135736	0.0141647
CP	CP R - FS L	-0.0376359	-0.0375721		CP	CP R - FS L	0.17191	0.183653		CP	CP R - FS L	-0.00268142	-0.00443194
CP	CP R - FS R	0.0832783	0.1194		CP	CP R - FS R	-0.118056	-0.147668		CP	CP R - FS R	-0.112813	-0.177084
CP	CP R - HT L	-0.105569	-0.107164		CP	CP R - HT L	0.00750926	0.00668227		CP	CP R - HT L	0.0130451	0.0119391
CP	CP R - HT R	-0.00617334	-0.010933		CP	CP R - HT R	-0.0353476	-0.0381791		CP	CP R - HT R	-0.120416	-0.132569
CP	CP R - IC L	-0.150155	-0.154337		CP	CP R - IC L	0.0676452	0.0670216		CP	CP R - IC L	0.0122494	0.014324
CP	CP R - IC R	-0.0351222	-0.0347505		CP	CP R - IC R	0.195056	0.198533		CP	CP R - IC R	0.0649022	0.0671302
CP	CP R - LSX L	0.0514525	0.0719887		CP	CP R - LSX L	-0.0783013	-0.101678		CP	CP R - LSX L	-0.0198315	-0.00756882
CP	CP R - LSX R	0.149641	0.246934		CP	CP R - LSX R	-0.100426	-0.165915		CP	CP R - LSX R	-0.0580274	-0.0611244
CP	CP R - MB R	-0.0773689	-0.0802149		CP	CP R - MB R	0.0746778	0.0815954		CP	CP R - MB R	0.0605385	0.0617492
CP	CP R - MRN L	-0.168103	-0.17479		CP	CP R - MRN L	0.063224	0.0638654		CP	CP R - MRN L	0.140203	0.14623
CP	CP R - MRN R	-0.110921	-0.114919		CP	CP R - MRN R	0.163976	0.178769		CP	CP R - MRN R	0.120166	0.127766
CP	CP R - MY L	-0.13173	-0.132994		CP	CP R - MY L	0.0979887	0.0991455		CP	CP R - MY L	-0.0328312	-0.033046
CP	CP R - MY R	-0.137341	-0.138397		CP	CP R - MY R	0.0983297	0.0993483		CP	CP R - MY R	0.00744365	0.00715161
CP	CP R - NBM L	-0.0562546	-0.0560931		CP	CP R - NBM L	0.0477263	0.0479433		CP	CP R - NBM L	0.0572352	0.0574651
CP	CP R - NBM R	0.0578113	0.0598017		CP	CP R - NBM R	-0.161285	-0.196341		CP	CP R - NBM R	-0.132522	-0.184706
CP	CP R - OLF L	-0.0156162	-0.0160661		CP	CP R - OLF L	0.00242833	0.00233792		CP	CP R - OLF L	0.00858121	0.00868728
CP	CP R - OLF R	0.0859077	0.102869		CP	CP R - OLF R	-0.0716607	-0.090547		CP	CP R - OLF R	-0.091925	-0.111787
CP	CP R - OT L	-0.0124699	-0.0146155		CP	CP R - OT L	0.0569196	0.0576121		CP	CP R - OT L	-0.0479817	-0.0484448
CP	CP R - OT R	-0.0211336	-0.0670723		CP	CP R - OT R	-0.0391623	-0.00787688		CP	CP R - OT R	-0.0880529	-0.129254
CP	CP R - PAG L	-0.205998	-0.214835		CP	CP R - PAG L	0.16533	0.171974		CP	CP R - PAG L	0.124993	0.133225
CP	CP R - PAG R	-0.197597	-0.205343		CP	CP R - PAG R	0.165965	0.174412		CP	CP R - PAG R	0.125818	0.133464
CP	CP R - PALc L	-0.204241	-0.219158		CP	CP R - PALc L	0.0348718	0.033228		CP	CP R - PALc L	0.176122	0.190331
CP	CP R - PALc R	0.0685404	0.083773		CP	CP R - PALc R	-0.0412041	-0.0397505		CP	CP R - PALc R	-0.149833	-0.250455
CP	CP R - PALd L	-0.216364	-0.220858		CP	CP R - PALd L	0.0157583	0.017231		CP	CP R - PALd L	0.24635	0.251241
CP	CP R - PALd R	0.0639803	0.0916556		CP	CP R - PALd R	-0.0163115	-0.0167203		CP	CP R - PALd R	-0.114221	-0.178688
CP	CP R - PALm L	-0.0721051	-0.0826799		CP	CP R - PALm L	0.0790954	0.0858372		CP	CP R - PALm L	-0.0311806	-0.0331673
CP	CP R - PALm R	-0.069744	-0.116486		CP	CP R - PALm R	0.00700256	0.0347356		CP	CP R - PALm R	-0.0779916	-0.119164
CP	CP R - PALv L	-0.0973059	-0.100429		CP	CP R - PALv L	0.118576	0.122909		CP	CP R - PALv L	-0.00490517	-0.00484912
CP	CP R - PALv R	0.0466099	0.0256926		CP	CP R - PALv R	-0.062686	-0.052228		CP	CP R - PALv R	-0.117345	-0.194333
CP	CP R - PB L	-0.070241	-0.0709179		CP	CP R - PB L	0.0211623	0.0205723		CP	CP R - PB L	0.104377	0.105673
CP	CP R - PB R	-0.0329233	-0.0205287		CP	CP R - PB R	0.233892	0.252044		CP	CP R - PB R	0.0814973	0.0955315
CP	CP R - PRNr L	-0.0709549	-0.0721659		CP	CP R - PRNr L	0.0978525	0.0991545		CP	CP R - PRNr L	-0.0109588	-0.0105554
CP	CP R - PRNr R	-0.0847886	-0.0878741		CP	CP R - PRNr R	0.0558672	0.0581183		CP	CP R - PRNr R	-0.00978396	-0.0104431
CP	CP R - RHP L	0.163975	0.165766		CP	CP R - RHP L	0.0621197	0.0631186		CP	CP R - RHP L	0.0106084	0.0117846
CP	CP R - RHP R	0.0886618	0.0956498		CP	CP R - RHP R	0.119032	0.124928		CP	CP R - RHP R	0.0650524	0.0706114
CP	CP R - SC L	-0.126567	-0.130147		CP	CP R - SC L	0.189818	0.192773		CP	CP R - SC L	0.0624799	0.0666895
CP	CP R - SC R	-0.116759	-0.117598		CP	CP R - SC R	0.190495	0.194333		CP	CP R - SC R	0.0900735	0.0913039
CP	CP R - SN L	-0.141277	-0.144647		CP	CP R - SN L	-0.0707383	-0.0732396		CP	CP R - SN L	0.00279332	0.00144467
CP	CP R - SN R	0.0761403	0.0765489		CP	CP R - SN R	0.0207841	0.02097		CP	CP R - SN R	-0.0154066	-0.0156528
CP	CP R - STN L	-0.189402	-0.191831		CP	CP R - STN L	0.00736309	0.00619486		CP	CP R - STN L	0.0142689	0.0133863
CP	CP R - STN R	-0.0332853	-0.0355753		CP	CP R - STN R	-0.0923677	-0.0965851		CP	CP R - STN R	-0.00430897	-0.00734455
CP	CP R - TH L	-0.141558	-0.149661		CP	CP R - TH L	0.00335651	0.00911273		CP	CP R - TH L	0.184712	0.187646
CP	CP R - TH R	-0.152139	-0.154256		CP	CP R - TH R	-0.018131	-0.0199225		CP	CP R - TH R	0.0118168	0.0120036
CP	CP R - VTA L	-0.100756	-0.101526		CP	CP R - VTA L	-0.0114663	-0.0116558		CP	CP R - VTA L	0.030211	0.0300909
CP	CP R - VTA R	-0.0980387	-0.0987444		CP	CP R - VTA R	-0.0187231	-0.0185577		CP	CP R - VTA R	-0.0143725	-0.0145558
CP	CP R - ZI L	-0.174733	-0.176592		CP	CP R - ZI L	-0.00912365	-0.00964943		CP	CP R - ZI L	0.0961747	0.0972925
CP	CP R - ZI R	-0.0923501	-0.0978015		CP	CP R - ZI R	-0.110299	-0.116597		CP	CP R - ZI R	0.00654051	0.00205587
CSm	CSm L - CSm R	0.0422205	0.151131		CSm	CSm L - CSm R	-0.0520697	-0.170857		CSm	CSm L - CSm R	0.0129071	0.0460834
CSm	CSm L - MY L	0.0581392	0.0771972		CSm	CSm L - MY L	0.126355	0.149126		CSm	CSm L - MY L	-0.0672288	-0.0925627
CSm	CSm L - MY R	0.0663504	0.081849		CSm	CSm L - MY R	0.119048	0.137201		CSm	CSm L - MY R	-0.0694961	-0.0923612
CSm	CSm L - SN L	-0.0452757	-0.047892		CSm	CSm L - SN L	-0.0720454	-0.0817824		CSm	CSm L - SN L	0.0267371	0.0276942
CSm	CSm L - SN R	0.196297	0.215432		CSm	CSm L - SN R	-0.198804	-0.217452		CSm	CSm L - SN R	0.0272476	0.0340302
CSm	CSm R - MY L	0.0161297	0.0241189		CSm	CSm R - MY L	0.102067	0.117445		CSm	CSm R - MY L	-0.083647	-0.100099
CSm	CSm R - MY R	0.0204019	0.0286416		CSm	CSm R - MY R	0.0920759	0.110198		CSm	CSm R - MY R	-0.0772125	-0.0923441
CSm	CSm R - SN L	-0.00705125	-0.00309971		CSm	CSm R - SN L	-0.131359	-0.14302		CSm	CSm R - SN L	0.0677963	0.0712482
CSm	CSm R - SN R	0.175968	0.201538		CSm	CSm R - SN R	-0.133709	-0.15572		CSm	CSm R - SN R	-0.00298122	0.0066487
ECT	ECT L - ACB L	-0.00774772	-0.00826056		ECT	ECT L - ACB L	0.0169408	0.0175649		ECT	ECT L - ACB L	-0.0234228	-0.0250375
ECT	ECT L - ACB R	0.200452	0.203307		ECT	ECT L - ACB R	0.0701026	0.0719722		ECT	ECT L - ACB R	-0.0311859	-0.0321239
ECT	ECT L - AMY L	-0.0420797	-0.0433835		ECT	ECT L - AMY L	0.0753632	0.0766836		ECT	ECT L - AMY L	-0.0183701	-0.0176085
ECT	ECT L - AMY R	-0.121263	-0.123484		ECT	ECT L - AMY R	0.0803386	0.0808315		ECT	ECT L - AMY R	0.118109	0.119943
ECT	ECT L - CB L	-0.181664	-0.184289		ECT	ECT L - CB L	-0.0332287	-0.0332635		ECT	ECT L - CB L	-0.0313009	-0.0331337
ECT	ECT L - CB R	-0.0660982	-0.0695886		ECT	ECT L - CB R	0.024485	0.0272018		ECT	ECT L - CB R	-0.0628211	-0.0645566
ECT	ECT L - COA L	-0.0647248	-0.0668384		ECT	ECT L - COA L	0.13388	0.138466		ECT	ECT L - COA L	-0.0234862	-0.0284548
ECT	ECT L - COA R	-0.160024	-0.16269		ECT	ECT L - COA R	0.00958517	0.01127		ECT	ECT L - COA R	0.0881843	0.0905561
ECT	ECT L - CP L	0.133418	0.132223		ECT	ECT L - CP L	0.13423	0.13815		ECT	ECT L - CP L	0.0212755	0.0245603
ECT	ECT L - CP R	0.15995	0.163151		ECT	ECT L - CP R	0.00356217	0.00162805		ECT	ECT L - CP R	0.0237188	0.0259829
ECT	ECT L - CSm L	0.055052	0.0632299		ECT	ECT L - CSm L	-0.366874	-0.382774		ECT	ECT L - CSm L	0.0395075	0.0370982
ECT	ECT L - CSm R	0.0249711	0.0314754		ECT	ECT L - CSm R	-0.404384	-0.422185		ECT	ECT L - CSm R	0.0249651	0.0262689
ECT	ECT L - ECT R	0.161915	0.162616		ECT	ECT L - ECT R	-0.156705	-0.162459		ECT	ECT L - ECT R	0.0653688	0.0694823
ECT	ECT L - ENT L	0.042841	0.0646269		ECT	ECT L - ENT L	-0.166162	-0.192294		ECT	ECT L - ENT L	0.144895	0.157274
ECT	ECT L - ENT R	0.0313189	0.0330974		ECT	ECT L - ENT R	-0.0533496	-0.0561071		ECT	ECT L - ENT R	0.0272301	0.028873
ECT	ECT L - FS L	-0.0106913	-0.00739105		ECT	ECT L - FS L	0.16993	0.176705		ECT	ECT L - FS L	0.0527024	0.0561441
ECT	ECT L - FS R	0.0960235	0.0999794		ECT	ECT L - FS R	-0.0877906	-0.0920176		ECT	ECT L - FS R	0.102171	0.10609
ECT	ECT L - HIP L	0.270196	0.368249		ECT	ECT L - HIP L	0.105213	0.0858743		ECT	ECT L - HIP L	-0.0103181	-0.0113082
ECT	ECT L - HIP R	0.0906364	0.0939572		ECT	ECT L - HIP R	-0.1004	-0.103822		ECT	ECT L - HIP R	-0.021783	-0.0194945
ECT	ECT L - HT L	-0.0657839	-0.06573		ECT	ECT L - HT L	0.169845	0.172336		ECT	ECT L - HT L	-0.0699456	-0.071525
ECT	ECT L - HT R	-0.137667	-0.139551		ECT	ECT L - HT R	0.147487	0.149332		ECT	ECT L - HT R	-0.0152786	-0.0160547
ECT	ECT L - IC L	-0.0851022	-0.0997937		ECT	ECT L - IC L	0.0578666	0.0554891		ECT	ECT L - IC L	0.0831218	0.095967
ECT	ECT L - IC R	0.107881	0.116943		ECT	ECT L - IC R	-0.117348	-0.124828		ECT	ECT L - IC R	-0.0564242	-0.0600013
ECT	ECT L - LSX L	0.0511939	0.0513894		ECT	ECT L - LSX L	0.0682047	0.0713436		ECT	ECT L - LSX L	0.025948	0.0250912
ECT	ECT L - LSX R	0.119088	0.120533		ECT	ECT L - LSX R	0.00910829	0.0106838		ECT	ECT L - LSX R	0.00199435	0.00110757
ECT	ECT L - MB R	0.0524783	0.0806496		ECT	ECT L - MB R	-0.297191	-0.327751		ECT	ECT L - MB R	-0.0299819	-0.0445048
ECT	ECT L - MOB R	0.0394419	0.0391538		ECT	ECT L - MOB R	0.216214	0.219587		ECT	ECT L - MOB R	-0.070189	-0.0701954
ECT	ECT L - MRN L	0.2052	0.208834		ECT	ECT L - MRN L	-0.257666	-0.263014		ECT	ECT L - MRN L	0.0428243	0.0444369
ECT	ECT L - MRN R	0.0365111	0.0553854		ECT	ECT L - MRN R	-0.311515	-0.334835		ECT	ECT L - MRN R	0.00671131	0.00191135
ECT	ECT L - MY L	-0.125987	-0.128977		ECT	ECT L - MY L	-0.154306	-0.156464		ECT	ECT L - MY L	-0.00123161	-0.00110687
ECT	ECT L - MY R	-0.111903	-0.114589		ECT	ECT L - MY R	-0.159175	-0.161412		ECT	ECT L - MY R	-0.0295828	-0.0303885
ECT	ECT L - NBM L	-0.0539057	-0.0555444		ECT	ECT L - NBM L	0.112468	0.114328		ECT	ECT L - NBM L	-0.00100602	-0.000937892
ECT	ECT L - NBM R	0.0733646	0.0753007		ECT	ECT L - NBM R	0.0142092	0.0152256		ECT	ECT L - NBM R	0.102225	0.10475
ECT	ECT L - OLF L	-0.0319411	-0.0320619		ECT	ECT L - OLF L	0.0780923	0.0785259		ECT	ECT L - OLF L	0.0301509	0.0302012
ECT	ECT L - OLF R	-0.0219628	-0.0244058		ECT	ECT L - OLF R	0.100336	0.103014		ECT	ECT L - OLF R	0.125553	0.128939
ECT	ECT L - OT L	-0.0505995	-0.0527917		ECT	ECT L - OT L	0.0192156	0.0213498		ECT	ECT L - OT L	-0.0366689	-0.0398942
ECT	ECT L - OT R	0.108308	0.108898		ECT	ECT L - OT R	-0.00830301	-0.00840053		ECT	ECT L - OT R	0.0188137	0.0188779
ECT	ECT L - PAG L	0.0187819	0.020654		ECT	ECT L - PAG L	-0.175072	-0.179484		ECT	ECT L - PAG L	-0.0500978	-0.0521023
ECT	ECT L - PAG R	-0.000737732	0.0117798		ECT	ECT L - PAG R	-0.239512	-0.255177		ECT	ECT L - PAG R	0.00506722	0.000970918
ECT	ECT L - PALc L	0.0281883	0.0299081		ECT	ECT L - PALc L	0.0846435	0.0852193		ECT	ECT L - PALc L	0.0248041	0.0200336
ECT	ECT L - PALc R	0.110431	0.111675		ECT	ECT L - PALc R	-0.0383761	-0.0393616		ECT	ECT L - PALc R	0.00121061	0.00174279
ECT	ECT L - PALd L	0.10804	0.107005		ECT	ECT L - PALd L	0.108202	0.112546		ECT	ECT L - PALd L	-0.029705	-0.0277965
ECT	ECT L - PALd R	0.00611881	0.00602013		ECT	ECT L - PALd R	0.0222418	0.0229829		ECT	ECT L - PALd R	0.0214968	0.0210341
ECT	ECT L - PALm L	0.081046	0.082498		ECT	ECT L - PALm L	0.0585554	0.060179		ECT	ECT L - PALm L	-0.053068	-0.0552786
ECT	ECT L - PALm R	0.105987	0.106752		ECT	ECT L - PALm R	-0.00040033	-0.000446546		ECT	ECT L - PALm R	-0.0208226	-0.0210823
ECT	ECT L - PALv L	-0.015177	-0.0161787		ECT	ECT L - PALv L	0.0836207	0.0860419		ECT	ECT L - PALv L	-0.0309975	-0.0318118
ECT	ECT L - PALv R	0.0555789	0.055963		ECT	ECT L - PALv R	0.0235802	0.0235046		ECT	ECT L - PALv R	0.0438809	0.0444702
ECT	ECT L - PB L	-0.0292089	-0.029617		ECT	ECT L - PB L	-0.137419	-0.13875		ECT	ECT L - PB L	-0.021663	-0.0217278
ECT	ECT L - PB R	-0.0164753	-0.00944791		ECT	ECT L - PB R	-0.272157	-0.285737		ECT	ECT L - PB R	0.0124106	0.0141348
ECT	ECT L - PIR L	-0.0820218	-0.0865403		ECT	ECT L - PIR L	0.0717191	0.0762701		ECT	ECT L - PIR L	0.0988786	0.103771
ECT	ECT L - PIR R	0.0878682	0.0872767		ECT	ECT L - PIR R	0.0533671	0.0544969		ECT	ECT L - PIR R	0.0977356	0.101673
ECT	ECT L - PRNr L	0.0223104	0.0260569		ECT	ECT L - PRNr L	-0.234982	-0.248387		ECT	ECT L - PRNr L	-0.0156695	-0.0188136
ECT	ECT L - PRNr R	-0.014251	-0.0182618		ECT	ECT L - PRNr R	-0.309137	-0.319168		ECT	ECT L - PRNr R	-0.00744904	-0.00803618
ECT	ECT L - RHP L	0.147101	0.231833		ECT	ECT L - RHP L	0.145615	0.21787		ECT	ECT L - RHP L	0.0472142	0.0572844
ECT	ECT L - RHP R	0.216464	0.223727		ECT	ECT L - RHP R	-0.182763	-0.189896		ECT	ECT L - RHP R	-0.0438374	-0.0440602
ECT	ECT L - SC L	0.0213544	0.0294638		ECT	ECT L - SC L	0.00950475	0.0124354		ECT	ECT L - SC L	0.023896	0.0222387
ECT	ECT L - SC R	0.141491	0.147835		ECT	ECT L - SC R	-0.166739	-0.173592		ECT	ECT L - SC R	-0.0289703	-0.0331516
ECT	ECT L - SN L	0.152272	0.155346		ECT	ECT L - SN L	-0.229293	-0.233478		ECT	ECT L - SN L	0.0112828	0.00972902
ECT	ECT L - SN R	-0.0895024	-0.0969205		ECT	ECT L - SN R	0.0447652	0.0519428		ECT	ECT L - SN R	0.00475156	0.0116824
ECT	ECT L - STN L	-0.0806616	-0.0788034		ECT	ECT L - STN L	0.0795019	0.0792531		ECT	ECT L - STN L	-0.0410419	-0.0464138
ECT	ECT L - STN R	-0.163138	-0.16476		ECT	ECT L - STN R	0.125391	0.126208		ECT	ECT L - STN R	0.00979298	0.0108004
ECT	ECT L - TH L	0.118101	0.119813		ECT	ECT L - TH L	-0.0540207	-0.0554455		ECT	ECT L - TH L	-0.0639655	-0.0654417
ECT	ECT L - TH R	-0.0778771	-0.0774524		ECT	ECT L - TH R	-0.0468068	-0.0480462		ECT	ECT L - TH R	-0.0459776	-0.0520932
ECT	ECT L - VTA L	0.0681258	0.0708005		ECT	ECT L - VTA L	0.0118679	0.0111563		ECT	ECT L - VTA L	-0.0346537	-0.0368873
ECT	ECT L - VTA R	-0.0777818	-0.0799193		ECT	ECT L - VTA R	-0.0504462	-0.0502021		ECT	ECT L - VTA R	0.048911	0.0509479
ECT	ECT L - ZI L	-0.0470342	-0.0461984		ECT	ECT L - ZI L	0.113345	0.114663		ECT	ECT L - ZI L	-0.0688044	-0.0712744
ECT	ECT L - ZI R	-0.178807	-0.180611		ECT	ECT L - ZI R	0.043471	0.0438838		ECT	ECT L - ZI R	0.0017431	0.00251408
ECT	ECT R - ACB L	0.0831531	0.0824669		ECT	ECT R - ACB L	0.119495	0.12525		ECT	ECT R - ACB L	-0.0451485	-0.0477626
ECT	ECT R - ACB R	0.0871516	0.0881759		ECT	ECT R - ACB R	0.0618619	0.0624908		ECT	ECT R - ACB R	-0.0288774	-0.0297801
ECT	ECT R - AMY L	0.0258233	0.0259068		ECT	ECT R - AMY L	0.121799	0.123645		ECT	ECT R - AMY L	-0.139546	-0.141319
ECT	ECT R - AMY R	-0.00216298	-0.00594546		ECT	ECT R - AMY R	0.0774201	0.0815285		ECT	ECT R - AMY R	0.0339005	0.0374889
ECT	ECT R - CB L	-0.0468566	-0.0737442		ECT	ECT R - CB L	0.182133	0.211048		ECT	ECT R - CB L	-0.0540755	-0.0345062
ECT	ECT R - CB R	-0.0512457	-0.0561451		ECT	ECT R - CB R	0.0553427	0.056107		ECT	ECT R - CB R	0.0978879	0.103445
ECT	ECT R - COA L	0.0181761	0.0182297		ECT	ECT R - COA L	-0.0924226	-0.0930019		ECT	ECT R - COA L	-0.150097	-0.154628
ECT	ECT R - COA R	0.0502775	0.0509404		ECT	ECT R - COA R	0.0550913	0.0559863		ECT	ECT R - COA R	0.07704	0.0778518
ECT	ECT R - CP L	-0.0628969	-0.072394		ECT	ECT R - CP L	0.143316	0.154311		ECT	ECT R - CP L	-0.075481	-0.0862314
ECT	ECT R - CP R	-0.0337854	-0.0341483		ECT	ECT R - CP R	0.10611	0.106647		ECT	ECT R - CP R	0.0139261	0.0139353
ECT	ECT R - CSm L	0.064591	0.0640018		ECT	ECT R - CSm L	0.0470595	0.0480207		ECT	ECT R - CSm L	-0.0252908	-0.0254768
ECT	ECT R - CSm R	0.0627731	0.0625319		ECT	ECT R - CSm R	0.0683466	0.0702543		ECT	ECT R - CSm R	-0.0427874	-0.0442669
ECT	ECT R - ENT L	0.22193	0.228877		ECT	ECT R - ENT L	-0.182054	-0.18535		ECT	ECT R - ENT L	-0.137744	-0.144208
ECT	ECT R - ENT R	0.0572672	0.0600275		ECT	ECT R - ENT R	-0.158494	-0.181736		ECT	ECT R - ENT R	-0.0528655	-0.0527286
ECT	ECT R - FS L	0.0703346	0.0769904		ECT	ECT R - FS L	-0.0783413	-0.0842904		ECT	ECT R - FS L	-0.218556	-0.2285
ECT	ECT R - FS R	0.0213131	0.0217044		ECT	ECT R - FS R	0.227558	0.231069		ECT	ECT R - FS R	-0.00176169	-0.00112014
ECT	ECT R - HIP L	0.244009	0.254722		ECT	ECT R - HIP L	-0.180173	-0.188563		ECT	ECT R - HIP L	0.0275939	0.027568
ECT	ECT R - HIP R	-0.0387371	-0.0535211		ECT	ECT R - HIP R	-0.0450665	-0.048158		ECT	ECT R - HIP R	0.000145809	-0.00571385
ECT	ECT R - HT L	-0.20407	-0.207924		ECT	ECT R - HT L	-0.0859474	-0.0877412		ECT	ECT R - HT L	0.0520089	0.0534156
ECT	ECT R - HT R	-0.135291	-0.137409		ECT	ECT R - HT R	0.0228804	0.023314		ECT	ECT R - HT R	0.0454565	0.0457723
ECT	ECT R - IC L	0.0660792	0.068465		ECT	ECT R - IC L	0.0218804	0.023885		ECT	ECT R - IC L	0.00211602	0.00518658
ECT	ECT R - IC R	-0.160253	-0.232586		ECT	ECT R - IC R	-0.0431447	-0.0359977		ECT	ECT R - IC R	0.0987869	0.122893
ECT	ECT R - LSX L	-0.117103	-0.120024		ECT	ECT R - LSX L	0.125662	0.128468		ECT	ECT R - LSX L	0.0373033	0.0377279
ECT	ECT R - LSX R	-0.117836	-0.118327		ECT	ECT R - LSX R	0.050714	0.0510096		ECT	ECT R - LSX R	0.129803	0.130892
ECT	ECT R - MB R	0.127877	0.129897		ECT	ECT R - MB R	0.0232909	0.023517		ECT	ECT R - MB R	-0.0661416	-0.0675962
ECT	ECT R - MOB R	0.125993	0.127146		ECT	ECT R - MOB R	0.0363553	0.0374861		ECT	ECT R - MOB R	-0.0648609	-0.0664413
ECT	ECT R - MRN L	0.175439	0.180439		ECT	ECT R - MRN L	-0.0654554	-0.0672684		ECT	ECT R - MRN L	-0.00878972	-0.00723368
ECT	ECT R - MRN R	0.0716647	0.0722988		ECT	ECT R - MRN R	-0.00836092	-0.00882132		ECT	ECT R - MRN R	-0.0289381	-0.0287285
ECT	ECT R - MY L	0.181123	0.185399		ECT	ECT R - MY L	-0.065598	-0.0692556		ECT	ECT R - MY L	0.044341	0.0421249
ECT	ECT R - MY R	0.199239	0.201476		ECT	ECT R - MY R	-0.067241	-0.068843		ECT	ECT R - MY R	0.0345299	0.0344995
ECT	ECT R - NBM L	-0.0670111	-0.0671711		ECT	ECT R - NBM L	-0.0826602	-0.0832891		ECT	ECT R - NBM L	-0.00242707	-0.00258796
ECT	ECT R - NBM R	0.042062	0.0426018		ECT	ECT R - NBM R	0.151697	0.152932		ECT	ECT R - NBM R	-0.0620598	-0.0620217
ECT	ECT R - OLF L	0.0656436	0.0682223		ECT	ECT R - OLF L	-0.0562721	-0.0583754		ECT	ECT R - OLF L	-0.0907082	-0.0939148
ECT	ECT R - OLF R	0.0886792	0.0905094		ECT	ECT R - OLF R	0.00242899	0.000762088		ECT	ECT R - OLF R	0.0745034	0.0786644
ECT	ECT R - OT L	0.169248	0.171567		ECT	ECT R - OT L	-0.0183416	-0.018432		ECT	ECT R - OT L	-0.0858386	-0.0872167
ECT	ECT R - OT R	0.159107	0.159837		ECT	ECT R - OT R	0.111275	0.113985		ECT	ECT R - OT R	-0.103165	-0.105233
ECT	ECT R - PAG L	0.186808	0.198396		ECT	ECT R - PAG L	-0.0465113	-0.0522101		ECT	ECT R - PAG L	0.00434834	0.00944199
ECT	ECT R - PAG R	0.121195	0.126368		ECT	ECT R - PAG R	0.0109971	0.00926423		ECT	ECT R - PAG R	-0.0398007	-0.037604
ECT	ECT R - PALc L	-0.133114	-0.136638		ECT	ECT R - PALc L	0.0602915	0.0621514		ECT	ECT R - PALc L	-0.00288131	-0.00183196
ECT	ECT R - PALc R	-0.0975027	-0.097212		ECT	ECT R - PALc R	0.120508	0.122657		ECT	ECT R - PALc R	0.083653	0.0852679
ECT	ECT R - PALd L	-0.109235	-0.111726		ECT	ECT R - PALd L	0.093461	0.0958406		ECT	ECT R - PALd L	0.017358	0.0155204
ECT	ECT R - PALd R	-0.0519533	-0.054223		ECT	ECT R - PALd R	0.0404041	0.0418957		ECT	ECT R - PALd R	-0.105793	-0.108299
ECT	ECT R - PALm L	0.0288549	0.02873		ECT	ECT R - PALm L	0.0354185	0.0358368		ECT	ECT R - PALm L	-0.0102012	-0.0111598
ECT	ECT R - PALm R	0.044339	0.043573		ECT	ECT R - PALm R	0.161201	0.166868		ECT	ECT R - PALm R	-0.00536223	-0.00531448
ECT	ECT R - PALv L	0.0354401	0.0340669		ECT	ECT R - PALv L	0.00202338	0.00325864		ECT	ECT R - PALv L	-0.0713312	-0.075626
ECT	ECT R - PALv R	0.0625033	0.0618083		ECT	ECT R - PALv R	0.148205	0.15081		ECT	ECT R - PALv R	-0.0439839	-0.0429884
ECT	ECT R - PB L	0.153696	0.164681		ECT	ECT R - PB L	-0.0445812	-0.0514648		ECT	ECT R - PB L	-0.0483989	-0.0448491
ECT	ECT R - PB R	0.0353942	0.0360948		ECT	ECT R - PB R	0.11757	0.120131		ECT	ECT R - PB R	-0.0994747	-0.103482
ECT	ECT R - PIR L	0.108221	0.110607		ECT	ECT R - PIR L	-0.0344757	-0.0340359		ECT	ECT R - PIR L	-0.192272	-0.198793
ECT	ECT R - PIR R	0.175417	0.180949		ECT	ECT R - PIR R	0.0939409	0.0936592		ECT	ECT R - PIR R	-0.0725159	-0.0720534
ECT	ECT R - PRNr L	0.0460439	0.0497936		ECT	ECT R - PRNr L	-0.142053	-0.1463		ECT	ECT R - PRNr L	-0.0430653	-0.046133
ECT	ECT R - PRNr R	0.089295	0.0946039		ECT	ECT R - PRNr R	0.0949595	0.0987228		ECT	ECT R - PRNr R	0.0152954	0.0154732
ECT	ECT R - RHP L	0.171981	0.180426		ECT	ECT R - RHP L	-0.202689	-0.219555		ECT	ECT R - RHP L	0.0338227	0.0458042
ECT	ECT R - RHP R	-0.111454	-0.185487		ECT	ECT R - RHP R	-0.049924	-0.025573		ECT	ECT R - RHP R	0.0710027	0.0769765
ECT	ECT R - SC L	0.128361	0.130815		ECT	ECT R - SC L	-0.149613	-0.155107		ECT	ECT R - SC L	-0.0521099	-0.0505853
ECT	ECT R - SC R	-0.057082	-0.0619003		ECT	ECT R - SC R	-0.0643275	-0.0678483		ECT	ECT R - SC R	0.0317362	0.0278332
ECT	ECT R - SN L	-0.0121605	-0.0115801		ECT	ECT R - SN L	-0.0159241	-0.0158172		ECT	ECT R - SN L	0.0585762	0.0592616
ECT	ECT R - SN R	0.0312622	0.0364202		ECT	ECT R - SN R	-0.0735957	-0.0798595		ECT	ECT R - SN R	-0.0613878	-0.0666063
ECT	ECT R - STN L	-0.0509417	-0.0516365		ECT	ECT R - STN L	-0.106487	-0.107204		ECT	ECT R - STN L	-0.114699	-0.116149
ECT	ECT R - STN R	-0.160364	-0.16608		ECT	ECT R - STN R	0.0230016	0.0245397		ECT	ECT R - STN R	0.0757928	0.0766706
ECT	ECT R - TH L	0.114655	0.116737		ECT	ECT R - TH L	-0.0922748	-0.0918043		ECT	ECT R - TH L	-0.099321	-0.101363
ECT	ECT R - TH R	-0.0530599	-0.0567018		ECT	ECT R - TH R	-0.0294041	-0.0315		ECT	ECT R - TH R	0.0756048	0.0782608
ECT	ECT R - VTA L	-0.180918	-0.182646		ECT	ECT R - VTA L	-0.0371823	-0.0375455		ECT	ECT R - VTA L	0.0869764	0.0877335
ECT	ECT R - VTA R	0.00287085	0.00408006		ECT	ECT R - VTA R	0.00808257	0.0084649		ECT	ECT R - VTA R	-0.10397	-0.107896
ECT	ECT R - ZI L	-0.0816452	-0.0828356		ECT	ECT R - ZI L	-0.0840949	-0.0842549		ECT	ECT R - ZI L	-0.0829292	-0.0838685
ECT	ECT R - ZI R	-0.139008	-0.143284		ECT	ECT R - ZI R	0.0912764	0.0934171		ECT	ECT R - ZI R	0.0755498	0.0748999
ENT	ENT L - ACB L	0.102571	0.103681		ENT	ENT L - ACB L	-0.186096	-0.188572		ENT	ENT L - ACB L	-0.0149321	-0.0152475
ENT	ENT L - ACB R	0.188776	0.190838		ENT	ENT L - ACB R	-0.0532903	-0.0541988		ENT	ENT L - ACB R	-0.104866	-0.10623
ENT	ENT L - AMY L	-0.0636781	-0.0660946		ENT	ENT L - AMY L	0.00922306	0.0113396		ENT	ENT L - AMY L	0.0155415	0.0153223
ENT	ENT L - AMY R	0.120627	0.123116		ENT	ENT L - AMY R	-0.0555694	-0.0571157		ENT	ENT L - AMY R	-0.065241	-0.067313
ENT	ENT L - CB L	-0.154006	-0.156915		ENT	ENT L - CB L	0.156162	0.158238		ENT	ENT L - CB L	0.00960086	0.0096977
ENT	ENT L - CB R	-0.00483034	-0.00990761		ENT	ENT L - CB R	0.0916892	0.0989705		ENT	ENT L - CB R	-0.0643116	-0.0588735
ENT	ENT L - COA L	-0.0810116	-0.0843456		ENT	ENT L - COA L	0.18019	0.194805		ENT	ENT L - COA L	-0.0269805	-0.0269826
ENT	ENT L - COA R	0.0382672	0.0390712		ENT	ENT L - COA R	-0.115879	-0.118248		ENT	ENT L - COA R	-0.057779	-0.0592629
ENT	ENT L - CP L	0.157842	0.160517		ENT	ENT L - CP L	-0.0439256	-0.0433112		ENT	ENT L - CP L	-0.0221024	-0.021992
ENT	ENT L - CP R	0.180075	0.18277		ENT	ENT L - CP R	-0.118104	-0.120705		ENT	ENT L - CP R	-0.130683	-0.130363
ENT	ENT L - CSm L	-0.169488	-0.172043		ENT	ENT L - CSm L	0.0752547	0.0771888		ENT	ENT L - CSm L	-0.047469	-0.0492284
ENT	ENT L - CSm R	-0.128736	-0.139795		ENT	ENT L - CSm R	-0.00200327	-0.00347092		ENT	ENT L - CSm R	0.00513636	0.00748913
ENT	ENT L - ENT R	0.0489116	0.0489805		ENT	ENT L - ENT R	-0.0409267	-0.0413693		ENT	ENT L - ENT R	0.0276046	0.0287821
ENT	ENT L - FS L	0.0604732	0.0604912		ENT	ENT L - FS L	-0.0937361	-0.0947629		ENT	ENT L - FS L	-0.007302	-0.00719846
ENT	ENT L - FS R	0.155085	0.162297		ENT	ENT L - FS R	-0.050834	-0.056675		ENT	ENT L - FS R	-0.0171251	-0.012008
ENT	ENT L - HT L	0.00899432	0.0115917		ENT	ENT L - HT L	0.00722963	0.00446356		ENT	ENT L - HT L	0.0354914	0.0375788
ENT	ENT L - HT R	0.0696231	0.073109		ENT	ENT L - HT R	-0.0684969	-0.0717526		ENT	ENT L - HT R	-0.0426331	-0.0427215
ENT	ENT L - IC L	-0.173228	-0.174988		ENT	ENT L - IC L	-0.104602	-0.106026		ENT	ENT L - IC L	0.101997	0.103343
ENT	ENT L - IC R	0.132908	0.15119		ENT	ENT L - IC R	-0.128756	-0.149634		ENT	ENT L - IC R	-0.149001	-0.166432
ENT	ENT L - LSX L	0.144053	0.147042		ENT	ENT L - LSX L	-0.0110832	-0.0119373		ENT	ENT L - LSX L	-0.110536	-0.112434
ENT	ENT L - LSX R	0.199505	0.202		ENT	ENT L - LSX R	-0.0234849	-0.02369		ENT	ENT L - LSX R	-0.149356	-0.150667
ENT	ENT L - MB R	-0.000289516	0.00210175		ENT	ENT L - MB R	-0.00797641	-0.00786179		ENT	ENT L - MB R	0.0118567	0.0110942
ENT	ENT L - MRN L	-0.137128	-0.145377		ENT	ENT L - MRN L	0.0547024	0.0553024		ENT	ENT L - MRN L	0.0284325	0.028681
ENT	ENT L - MRN R	-0.0398607	-0.0370476		ENT	ENT L - MRN R	-0.026893	-0.0314067		ENT	ENT L - MRN R	0.03638	0.0383292
ENT	ENT L - MY L	-0.0723317	-0.0740766		ENT	ENT L - MY L	-0.130706	-0.13339		ENT	ENT L - MY L	-0.11148	-0.112813
ENT	ENT L - MY R	-0.0579306	-0.0587628		ENT	ENT L - MY R	-0.124138	-0.125828		ENT	ENT L - MY R	-0.12015	-0.12172
ENT	ENT L - NBM L	0.074886	0.0781607		ENT	ENT L - NBM L	-0.010042	-0.0106508		ENT	ENT L - NBM L	0.0519054	0.0526209
ENT	ENT L - NBM R	0.146981	0.150438		ENT	ENT L - NBM R	-0.0509231	-0.0504764		ENT	ENT L - NBM R	-0.0791329	-0.0807916
ENT	ENT L - OLF L	0.0485899	0.0496289		ENT	ENT L - OLF L	-0.0381931	-0.0387955		ENT	ENT L - OLF L	0.0432571	0.0452802
ENT	ENT L - OLF R	0.191796	0.198654		ENT	ENT L - OLF R	-0.174683	-0.181144		ENT	ENT L - OLF R	-0.0127539	-0.0140468
ENT	ENT L - OT L	0.0881123	0.0895626		ENT	ENT L - OT L	-0.16789	-0.169729		ENT	ENT L - OT L	-0.0451147	-0.0465125
ENT	ENT L - OT R	0.143739	0.146478		ENT	ENT L - OT R	-0.0551203	-0.057608		ENT	ENT L - OT R	0.0382984	0.040593
ENT	ENT L - PAG L	-0.191592	-0.195765		ENT	ENT L - PAG L	-0.0265288	-0.0289277		ENT	ENT L - PAG L	0.0758738	0.0786341
ENT	ENT L - PAG R	-0.171548	-0.17906		ENT	ENT L - PAG R	-0.0383901	-0.0420128		ENT	ENT L - PAG R	0.0807592	0.0854349
ENT	ENT L - PALc L	0.160337	0.165563		ENT	ENT L - PALc L	0.0134318	0.0119929		ENT	ENT L - PALc L	-0.0478237	-0.0492086
ENT	ENT L - PALc R	0.164732	0.167411		ENT	ENT L - PALc R	-0.113487	-0.11584		ENT	ENT L - PALc R	-0.119732	-0.12012
ENT	ENT L - PALd L	0.0676253	0.070015		ENT	ENT L - PALd L	-0.00818923	-0.00525704		ENT	ENT L - PALd L	0.0373407	0.0356529
ENT	ENT L - PALd R	0.121906	0.123333		ENT	ENT L - PALd R	-0.136776	-0.138849		ENT	ENT L - PALd R	-0.0872426	-0.0873589
ENT	ENT L - PALm L	0.166783	0.167861		ENT	ENT L - PALm L	-0.0555471	-0.0562789		ENT	ENT L - PALm L	-0.071266	-0.0720634
ENT	ENT L - PALm R	0.191067	0.193232		ENT	ENT L - PALm R	-0.0482957	-0.0497119		ENT	ENT L - PALm R	-0.0490815	-0.0493426
ENT	ENT L - PALv L	0.0632809	0.0650961		ENT	ENT L - PALv L	-0.186026	-0.188689		ENT	ENT L - PALv L	-0.00388562	-0.00412149
ENT	ENT L - PALv R	0.182582	0.186373		ENT	ENT L - PALv R	-0.0381164	-0.0402995		ENT	ENT L - PALv R	-0.0523233	-0.0515952
ENT	ENT L - PB L	-0.0525423	-0.0569911		ENT	ENT L - PB L	-0.0459642	-0.0494794		ENT	ENT L - PB L	0.0242683	0.0218069
ENT	ENT L - PB R	0.0677934	0.0747062		ENT	ENT L - PB R	0.00739569	0.00659304		ENT	ENT L - PB R	-0.053925	-0.0597449
ENT	ENT L - PRNr L	-0.141455	-0.155616		ENT	ENT L - PRNr L	0.0882684	0.0968343		ENT	ENT L - PRNr L	-0.187251	-0.20052
ENT	ENT L - PRNr R	-0.0800653	-0.0991846		ENT	ENT L - PRNr R	-0.058471	-0.0699834		ENT	ENT L - PRNr R	-0.0106259	-0.00245395
ENT	ENT L - RHP L	0.0398775	0.0592919		ENT	ENT L - RHP L	-0.102673	-0.134869		ENT	ENT L - RHP L	0.1817	0.20657
ENT	ENT L - RHP R	0.246985	0.257373		ENT	ENT L - RHP R	-0.15298	-0.161384		ENT	ENT L - RHP R	-0.0945621	-0.10012
ENT	ENT L - SC L	-0.190637	-0.197294		ENT	ENT L - SC L	-0.120896	-0.126537		ENT	ENT L - SC L	0.228506	0.235407
ENT	ENT L - SC R	0.0387115	0.0435244		ENT	ENT L - SC R	-0.188522	-0.197841		ENT	ENT L - SC R	-0.0145323	-0.0189363
ENT	ENT L - SN L	-0.0395466	-0.0420202		ENT	ENT L - SN L	0.00166156	0.00315043		ENT	ENT L - SN L	-0.0871139	-0.0917704
ENT	ENT L - SN R	-0.083801	-0.0867188		ENT	ENT L - SN R	-0.00125005	-0.00197427		ENT	ENT L - SN R	0.0140287	0.0151534
ENT	ENT L - STN L	-0.105595	-0.106155		ENT	ENT L - STN L	0.0685158	0.0688811		ENT	ENT L - STN L	-0.0517327	-0.0519019
ENT	ENT L - STN R	0.002524	0.00467843		ENT	ENT L - STN R	-0.0803718	-0.0849461		ENT	ENT L - STN R	0.0386222	0.0430731
ENT	ENT L - TH L	-0.136528	-0.139376		ENT	ENT L - TH L	-0.0356752	-0.037844		ENT	ENT L - TH L	0.0973584	0.100965
ENT	ENT L - TH R	-0.0738736	-0.0790504		ENT	ENT L - TH R	-0.188566	-0.202737		ENT	ENT L - TH R	0.124524	0.131104
ENT	ENT L - VTA L	-0.0411366	-0.0408096		ENT	ENT L - VTA L	0.0176463	0.0166883		ENT	ENT L - VTA L	-0.0335809	-0.0343605
ENT	ENT L - VTA R	-0.0862821	-0.0894843		ENT	ENT L - VTA R	-0.0912364	-0.0960847		ENT	ENT L - VTA R	-0.00751272	-0.00718231
ENT	ENT L - ZI L	-0.115708	-0.116915		ENT	ENT L - ZI L	0.0597479	0.0589305		ENT	ENT L - ZI L	0.0104652	0.0108653
ENT	ENT L - ZI R	-0.0193035	-0.01891		ENT	ENT L - ZI R	-0.160387	-0.169059		ENT	ENT L - ZI R	0.0264053	0.0282684
ENT	ENT R - ACB L	0.0168693	0.0170077		ENT	ENT R - ACB L	0.0863022	0.087214		ENT	ENT R - ACB L	-0.0167423	-0.0177613
ENT	ENT R - ACB R	0.0825297	0.0835522		ENT	ENT R - ACB R	0.0386961	0.0392067		ENT	ENT R - ACB R	-0.0455627	-0.0452856
ENT	ENT R - AMY L	-0.0289958	-0.0288455		ENT	ENT R - AMY L	0.147503	0.149992		ENT	ENT R - AMY L	0.00148755	0.00199621
ENT	ENT R - AMY R	-0.115194	-0.116164		ENT	ENT R - AMY R	0.0183366	0.018686		ENT	ENT R - AMY R	0.0456301	0.0463219
ENT	ENT R - CB L	-0.0850767	-0.0945045		ENT	ENT R - CB L	0.0124193	0.0182755		ENT	ENT R - CB L	0.0874575	0.0988259
ENT	ENT R - CB R	-0.0229329	-0.0231572		ENT	ENT R - CB R	-0.0487478	-0.0502432		ENT	ENT R - CB R	-0.0822635	-0.0822551
ENT	ENT R - COA L	-0.0946075	-0.0960366		ENT	ENT R - COA L	0.0472942	0.0474735		ENT	ENT R - COA L	0.00676657	0.00639224
ENT	ENT R - COA R	-0.00217772	0.00111604		ENT	ENT R - COA R	0.130254	0.14296		ENT	ENT R - COA R	0.071125	0.0724225
ENT	ENT R - CP L	-0.132782	-0.134098		ENT	ENT R - CP L	0.0633478	0.0644328		ENT	ENT R - CP L	-0.00803467	-0.00897541
ENT	ENT R - CP R	0.0735202	0.0754627		ENT	ENT R - CP R	0.094266	0.0963724		ENT	ENT R - CP R	-0.0457448	-0.0447465
ENT	ENT R - CSm L	0.160377	0.164542		ENT	ENT R - CSm L	-0.125352	-0.12897		ENT	ENT R - CSm L	0.110677	0.113922
ENT	ENT R - CSm R	0.167105	0.170671		ENT	ENT R - CSm R	-0.0485622	-0.0510042		ENT	ENT R - CSm R	0.0531687	0.0587283
ENT	ENT R - FS L	-0.206127	-0.216201		ENT	ENT R - FS L	-0.00430076	-0.0073564		ENT	ENT R - FS L	0.0530087	0.0564872
ENT	ENT R - FS R	0.106788	0.107984		ENT	ENT R - FS R	0.050736	0.0518136		ENT	ENT R - FS R	-0.0669482	-0.0677569
ENT	ENT R - HT L	-0.152876	-0.157145		ENT	ENT R - HT L	-0.184381	-0.188478		ENT	ENT R - HT L	0.042797	0.046334
ENT	ENT R - HT R	-0.100345	-0.104315		ENT	ENT R - HT R	-0.0911026	-0.0947277		ENT	ENT R - HT R	0.0209029	0.0242418
ENT	ENT R - IC L	0.10313	0.109694		ENT	ENT R - IC L	-0.0289247	-0.0311501		ENT	ENT R - IC L	0.168681	0.177441
ENT	ENT R - IC R	0.0391756	0.044054		ENT	ENT R - IC R	-0.292335	-0.305409		ENT	ENT R - IC R	-0.0549359	-0.0543179
ENT	ENT R - LSX L	0.0107552	0.0110837		ENT	ENT R - LSX L	0.0369884	0.0372923		ENT	ENT R - LSX L	-0.0548328	-0.0555863
ENT	ENT R - LSX R	0.0305474	0.0314323		ENT	ENT R - LSX R	-0.0204221	-0.021029		ENT	ENT R - LSX R	-0.0269215	-0.0278559
ENT	ENT R - MB R	0.203213	0.225456		ENT	ENT R - MB R	-0.0330393	-0.0304127		ENT	ENT R - MB R	-0.136519	-0.142013
ENT	ENT R - MRN L	0.27006	0.281066		ENT	ENT R - MRN L	-0.142511	-0.140091		ENT	ENT R - MRN L	0.107745	0.111031
ENT	ENT R - MRN R	0.151982	0.159217		ENT	ENT R - MRN R	-0.0883321	-0.0931614		ENT	ENT R - MRN R	-0.0781194	-0.0744549
ENT	ENT R - MY L	0.0684942	0.0686897		ENT	ENT R - MY L	-0.088423	-0.0886344		ENT	ENT R - MY L	0.0555721	0.0576373
ENT	ENT R - MY R	0.125522	0.126502		ENT	ENT R - MY R	-0.085886	-0.0869128		ENT	ENT R - MY R	0.00972543	0.0109598
ENT	ENT R - NBM L	-0.240751	-0.253445		ENT	ENT R - NBM L	-0.164262	-0.176625		ENT	ENT R - NBM L	0.070839	0.078014
ENT	ENT R - NBM R	0.0556199	0.0551342		ENT	ENT R - NBM R	0.103568	0.105046		ENT	ENT R - NBM R	-0.0386861	-0.0346408
ENT	ENT R - OLF L	-0.0663667	-0.0687949		ENT	ENT R - OLF L	0.045803	0.046659		ENT	ENT R - OLF L	0.0491234	0.0505093
ENT	ENT R - OLF R	-0.0364326	-0.0381952		ENT	ENT R - OLF R	0.0756019	0.0777605		ENT	ENT R - OLF R	0.0440952	0.0459372
ENT	ENT R - OT L	0.0240291	0.0248199		ENT	ENT R - OT L	-0.0251121	-0.0257919		ENT	ENT R - OT L	0.0613824	0.0618491
ENT	ENT R - OT R	0.117795	0.118461		ENT	ENT R - OT R	0.0150812	0.015026		ENT	ENT R - OT R	-0.0604005	-0.0607606
ENT	ENT R - PAG L	0.205691	0.212042		ENT	ENT R - PAG L	-0.204193	-0.214327		ENT	ENT R - PAG L	0.146403	0.155187
ENT	ENT R - PAG R	0.211865	0.216979		ENT	ENT R - PAG R	-0.271081	-0.277511		ENT	ENT R - PAG R	0.0467997	0.0460308
ENT	ENT R - PALc L	-0.161101	-0.170716		ENT	ENT R - PALc L	-0.133531	-0.1417		ENT	ENT R - PALc L	0.0175374	0.0254226
ENT	ENT R - PALc R	0.0414985	0.0447353		ENT	ENT R - PALc R	0.00362121	0.00379782		ENT	ENT R - PALc R	-0.045649	-0.0463084
ENT	ENT R - PALd L	-0.138953	-0.140051		ENT	ENT R - PALd L	0.0811413	0.0820655		ENT	ENT R - PALd L	-0.0582982	-0.0594074
ENT	ENT R - PALd R	-0.0694136	-0.0733425		ENT	ENT R - PALd R	0.0649334	0.0681746		ENT	ENT R - PALd R	0.0222646	0.0216947
ENT	ENT R - PALm L	-0.0445648	-0.0460895		ENT	ENT R - PALm L	-0.056229	-0.057266		ENT	ENT R - PALm L	0.0276351	0.0280157
ENT	ENT R - PALm R	0.0186414	0.0190345		ENT	ENT R - PALm R	0.00371117	0.00360195		ENT	ENT R - PALm R	-0.0468962	-0.0476892
ENT	ENT R - PALv L	-0.159114	-0.162884		ENT	ENT R - PALv L	0.0115105	0.0127816		ENT	ENT R - PALv L	0.0698789	0.0690347
ENT	ENT R - PALv R	0.0156222	0.0156303		ENT	ENT R - PALv R	0.00699476	0.00675437		ENT	ENT R - PALv R	-0.0429017	-0.0428064
ENT	ENT R - PB L	0.0945207	0.0975141		ENT	ENT R - PB L	-0.119018	-0.124642		ENT	ENT R - PB L	0.148464	0.155331
ENT	ENT R - PB R	0.110945	0.116669		ENT	ENT R - PB R	-0.0878882	-0.0914585		ENT	ENT R - PB R	-0.0774731	-0.0781289
ENT	ENT R - PRNr L	0.083051	0.0788905		ENT	ENT R - PRNr L	-0.209847	-0.21845		ENT	ENT R - PRNr L	0.149251	0.15814
ENT	ENT R - PRNr R	0.185062	0.217801		ENT	ENT R - PRNr R	0.0617336	0.0733928		ENT	ENT R - PRNr R	-0.0211114	-0.021184
ENT	ENT R - RHP L	0.166249	0.173495		ENT	ENT R - RHP L	-0.08638	-0.0918397		ENT	ENT R - RHP L	0.148385	0.153363
ENT	ENT R - RHP R	0.0755877	0.0821205		ENT	ENT R - RHP R	-0.101198	-0.104909		ENT	ENT R - RHP R	-0.178701	-0.213483
ENT	ENT R - SC L	0.226738	0.237386		ENT	ENT R - SC L	-0.184874	-0.192211		ENT	ENT R - SC L	0.0992592	0.10166
ENT	ENT R - SC R	0.187333	0.19392		ENT	ENT R - SC R	-0.230222	-0.237099		ENT	ENT R - SC R	-0.0703748	-0.074319
ENT	ENT R - SN L	0.175379	0.183809		ENT	ENT R - SN L	-0.0182682	-0.0113327		ENT	ENT R - SN L	0.101599	0.109243
ENT	ENT R - SN R	-0.0659869	-0.0808191		ENT	ENT R - SN R	0.0982778	0.118301		ENT	ENT R - SN R	-0.0109722	-0.00716975
ENT	ENT R - STN L	-0.0588626	-0.0643165		ENT	ENT R - STN L	-0.0275245	-0.027333		ENT	ENT R - STN L	-0.00215853	-0.00202635
ENT	ENT R - STN R	-0.101826	-0.103095		ENT	ENT R - STN R	-0.0854209	-0.0877292		ENT	ENT R - STN R	-0.0306166	-0.0315257
ENT	ENT R - TH L	0.10809	0.112185		ENT	ENT R - TH L	-0.0295209	-0.0293229		ENT	ENT R - TH L	-0.178453	-0.184866
ENT	ENT R - TH R	0.0984253	0.101959		ENT	ENT R - TH R	-0.117286	-0.121274		ENT	ENT R - TH R	-0.0801285	-0.0886558
ENT	ENT R - VTA L	0.0106632	0.0104882		ENT	ENT R - VTA L	-0.0772737	-0.0779768		ENT	ENT R - VTA L	0.0614446	0.061929
ENT	ENT R - VTA R	0.0291603	0.0296649		ENT	ENT R - VTA R	0.0026781	0.00279587		ENT	ENT R - VTA R	0.0141119	0.0141702
ENT	ENT R - ZI L	-0.0327603	-0.0353762		ENT	ENT R - ZI L	-0.060049	-0.0601282		ENT	ENT R - ZI L	-0.0595631	-0.0609146
ENT	ENT R - ZI R	-0.0199549	-0.0200166		ENT	ENT R - ZI R	-0.020171	-0.0201588		ENT	ENT R - ZI R	-0.00229407	-0.00223611
FRP	FRP L - ACA L	-0.0922812	-0.129724		FRP	FRP L - ACA L	-0.00147834	0.0134143		FRP	FRP L - ACA L	0.103432	0.135194
FRP	FRP L - ACA R	-0.0697225	-0.0845265		FRP	FRP L - ACA R	-0.0526261	-0.0601999		FRP	FRP L - ACA R	0.103313	0.131975
FRP	FRP L - ACB L	-0.054827	-0.0607379		FRP	FRP L - ACB L	-0.00686739	-0.0045148		FRP	FRP L - ACB L	-0.043466	-0.0544863
FRP	FRP L - ACB R	-0.0144764	-0.0167105		FRP	FRP L - ACB R	-0.155275	-0.164534		FRP	FRP L - ACB R	-0.0151437	-0.0181842
FRP	FRP L - AI L	0.0316189	0.0464582		FRP	FRP L - AI L	-0.0439447	-0.0434329		FRP	FRP L - AI L	-0.102205	-0.129854
FRP	FRP L - AI R	-0.0747306	-0.0795911		FRP	FRP L - AI R	-0.0736478	-0.0790918		FRP	FRP L - AI R	0.031614	0.0305936
FRP	FRP L - AMY L	-0.00226819	-0.00115639		FRP	FRP L - AMY L	-0.0508328	-0.0554858		FRP	FRP L - AMY L	-0.0926304	-0.0971691
FRP	FRP L - AMY R	0.0655488	0.0695743		FRP	FRP L - AMY R	-0.208391	-0.213996		FRP	FRP L - AMY R	0.0495719	0.0520014
FRP	FRP L - AUD L	-0.190837	-0.198897		FRP	FRP L - AUD L	0.155765	0.163392		FRP	FRP L - AUD L	0.0651476	0.0675582
FRP	FRP L - AUD R	-0.0678805	-0.0695121		FRP	FRP L - AUD R	0.135992	0.139316		FRP	FRP L - AUD R	-0.112566	-0.115801
FRP	FRP L - CB L	0.0575941	0.0594127		FRP	FRP L - CB L	0.0209605	0.022207		FRP	FRP L - CB L	0.0679199	0.0687179
FRP	FRP L - CB R	-0.0584501	-0.05953		FRP	FRP L - CB R	0.0822269	0.0834719		FRP	FRP L - CB R	0.0071378	0.00798902
FRP	FRP L - COA L	0.133517	0.135281		FRP	FRP L - COA L	-0.114542	-0.116882		FRP	FRP L - COA L	0.00428014	0.00365898
FRP	FRP L - COA R	0.0487083	0.0532031		FRP	FRP L - COA R	-0.144029	-0.148778		FRP	FRP L - COA R	0.0928713	0.0973638
FRP	FRP L - CP L	-0.135511	-0.154983		FRP	FRP L - CP L	0.0662744	0.0810245		FRP	FRP L - CP L	-0.109805	-0.131125
FRP	FRP L - CP R	-0.0092923	-0.00701568		FRP	FRP L - CP R	-0.164629	-0.177564		FRP	FRP L - CP R	0.0134706	0.0157999
FRP	FRP L - CSm L	0.15071	0.153653		FRP	FRP L - CSm L	0.0277815	0.0257517		FRP	FRP L - CSm L	-0.142963	-0.147485
FRP	FRP L - CSm R	0.115619	0.118114		FRP	FRP L - CSm R	-0.0530638	-0.0554947		FRP	FRP L - CSm R	-0.129302	-0.132603
FRP	FRP L - ECT L	-0.135689	-0.141297		FRP	FRP L - ECT L	0.00636989	0.00958926		FRP	FRP L - ECT L	0.113554	0.119449
FRP	FRP L - ECT R	0.0579651	0.0580079		FRP	FRP L - ECT R	0.113381	0.115316		FRP	FRP L - ECT R	-0.031816	-0.0326432
FRP	FRP L - ENT L	0.0607864	0.0610698		FRP	FRP L - ENT L	-0.0319516	-0.031798		FRP	FRP L - ENT L	0.0647719	0.0648848
FRP	FRP L - ENT R	-0.00397802	-0.00462719		FRP	FRP L - ENT R	-0.0633346	-0.0647572		FRP	FRP L - ENT R	0.0401936	0.0410678
FRP	FRP L - FRP R	0.138821	0.356911		FRP	FRP L - FRP R	-0.00117441	-0.0247449		FRP	FRP L - FRP R	-0.104363	-0.226235
FRP	FRP L - FS L	0.0179414	0.0108513		FRP	FRP L - FS L	0.0812297	0.0971453		FRP	FRP L - FS L	-0.168792	-0.185023
FRP	FRP L - FS R	0.0557246	0.0627098		FRP	FRP L - FS R	-0.203003	-0.222599		FRP	FRP L - FS R	0.045785	0.0520364
FRP	FRP L - GU L	-0.00778523	-0.00360989		FRP	FRP L - GU L	-0.0115137	-0.00694645		FRP	FRP L - GU L	-0.0967919	-0.116128
FRP	FRP L - GU R	-0.117891	-0.122929		FRP	FRP L - GU R	-0.0738062	-0.0769574		FRP	FRP L - GU R	0.0615683	0.0629063
FRP	FRP L - HIP L	0.0753163	0.0779964		FRP	FRP L - HIP L	0.206042	0.209737		FRP	FRP L - HIP L	-0.00881263	-0.00867167
FRP	FRP L - HIP R	-0.0396726	-0.0412169		FRP	FRP L - HIP R	-0.108197	-0.109925		FRP	FRP L - HIP R	0.0310828	0.0326073
FRP	FRP L - HT L	-0.0126079	-0.0148269		FRP	FRP L - HT L	-0.095937	-0.103805		FRP	FRP L - HT L	0.0263182	0.0298752
FRP	FRP L - HT R	0.0318655	0.0395424		FRP	FRP L - HT R	-0.190934	-0.20252		FRP	FRP L - HT R	0.115848	0.12501
FRP	FRP L - IC L	0.0376759	0.0387544		FRP	FRP L - IC L	0.141626	0.143043		FRP	FRP L - IC L	-0.0542452	-0.0554385
FRP	FRP L - IC R	-0.106683	-0.107678		FRP	FRP L - IC R	0.0695584	0.0704168		FRP	FRP L - IC R	0.0110995	0.0103516
FRP	FRP L - ILA L	-0.143224	-0.242352		FRP	FRP L - ILA L	0.0285729	0.0850929		FRP	FRP L - ILA L	0.0258646	0.0244594
FRP	FRP L - ILA R	-0.196095	-0.277435		FRP	FRP L - ILA R	0.0234704	0.0762278		FRP	FRP L - ILA R	0.0800671	0.0815049
FRP	FRP L - LSX L	-0.243187	-0.259811		FRP	FRP L - LSX L	-0.0237466	-0.0173378		FRP	FRP L - LSX L	0.089059	0.0785245
FRP	FRP L - LSX R	-0.172815	-0.182836		FRP	FRP L - LSX R	-0.139985	-0.143962		FRP	FRP L - LSX R	0.0786306	0.0735131
FRP	FRP L - MB R	0.0191615	0.0215851		FRP	FRP L - MB R	-0.156479	-0.160148		FRP	FRP L - MB R	0.0104421	0.00966794
FRP	FRP L - MO L	-0.00952998	-0.0267741		FRP	FRP L - MO L	0.0594153	0.119706		FRP	FRP L - MO L	-0.0737568	-0.145733
FRP	FRP L - MO R	-0.0499909	-0.0521365		FRP	FRP L - MO R	-0.0760929	-0.0889708		FRP	FRP L - MO R	0.0420476	0.0465806
FRP	FRP L - MOB R	0.168582	0.245752		FRP	FRP L - MOB R	0.00922753	-0.0300619		FRP	FRP L - MOB R	-0.104066	-0.109528
FRP	FRP L - MRN L	0.231804	0.238875		FRP	FRP L - MRN L	0.096917	0.0964394		FRP	FRP L - MRN L	-0.13734	-0.139408
FRP	FRP L - MRN R	0.0616177	0.0647961		FRP	FRP L - MRN R	-0.0801097	-0.0833794		FRP	FRP L - MRN R	-0.0720661	-0.0753431
FRP	FRP L - MY L	-0.0514319	-0.0532385		FRP	FRP L - MY L	0.048411	0.0502296		FRP	FRP L - MY L	-0.0661985	-0.0680385
FRP	FRP L - MY R	-0.0691224	-0.0708577		FRP	FRP L - MY R	0.050931	0.0522994		FRP	FRP L - MY R	-0.0349499	-0.0363081
FRP	FRP L - NBM L	-0.0635097	-0.0658388		FRP	FRP L - NBM L	-0.199816	-0.209442		FRP	FRP L - NBM L	-0.0141657	-0.0168753
FRP	FRP L - NBM R	0.0655485	0.0910361		FRP	FRP L - NBM R	-0.292133	-0.321836		FRP	FRP L - NBM R	0.162495	0.187231
FRP	FRP L - OLF L	0.13707	0.158898		FRP	FRP L - OLF L	-0.0875994	-0.0989332		FRP	FRP L - OLF L	-0.0253236	-0.0307597
FRP	FRP L - OLF R	0.0436281	0.0562785		FRP	FRP L - OLF R	-0.138918	-0.152349		FRP	FRP L - OLF R	0.0708059	0.0808599
FRP	FRP L - ORB L	-0.0377907	-0.0770591		FRP	FRP L - ORB L	0.0105141	0.0521853		FRP	FRP L - ORB L	0.00497127	0.0316563
FRP	FRP L - ORB R	-0.0877938	-0.149988		FRP	FRP L - ORB R	-0.00896123	0.0104282		FRP	FRP L - ORB R	-0.00439177	-0.0370314
FRP	FRP L - OT L	0.0175711	0.0139578		FRP	FRP L - OT L	-0.0290488	-0.0255762		FRP	FRP L - OT L	-0.0739692	-0.0809177
FRP	FRP L - OT R	0.00209569	-0.00327111		FRP	FRP L - OT R	-0.179525	-0.19614		FRP	FRP L - OT R	-0.0303166	-0.0300524
FRP	FRP L - PAG L	0.188589	0.198763		FRP	FRP L - PAG L	0.0633238	0.0601679		FRP	FRP L - PAG L	-0.159877	-0.167228
FRP	FRP L - PAG R	0.112835	0.118696		FRP	FRP L - PAG R	0.0300883	0.0279761		FRP	FRP L - PAG R	-0.128673	-0.133709
FRP	FRP L - PALc L	-0.164114	-0.177421		FRP	FRP L - PALc L	-0.0852073	-0.0829439		FRP	FRP L - PALc L	-0.0603041	-0.0706894
FRP	FRP L - PALc R	-0.0394226	-0.0353523		FRP	FRP L - PALc R	-0.231759	-0.244442		FRP	FRP L - PALc R	0.0993748	0.106772
FRP	FRP L - PALd L	-0.163515	-0.171534		FRP	FRP L - PALd L	0.0611341	0.0622572		FRP	FRP L - PALd L	-0.169876	-0.177199
FRP	FRP L - PALd R	0.126162	0.12885		FRP	FRP L - PALd R	-0.162243	-0.165378		FRP	FRP L - PALd R	-0.0968991	-0.0986444
FRP	FRP L - PALm L	-0.0732872	-0.0851727		FRP	FRP L - PALm L	-0.0934258	-0.0897169		FRP	FRP L - PALm L	-0.0082596	-0.0155817
FRP	FRP L - PALm R	-0.057128	-0.0662575		FRP	FRP L - PALm R	-0.170708	-0.180607		FRP	FRP L - PALm R	0.00426983	0.00198238
FRP	FRP L - PALv L	-0.0147579	-0.0206011		FRP	FRP L - PALv L	-0.0110994	-0.00336262		FRP	FRP L - PALv L	-0.103463	-0.116432
FRP	FRP L - PALv R	0.0424357	0.0490164		FRP	FRP L - PALv R	-0.249333	-0.272874		FRP	FRP L - PALv R	0.0368668	0.0456735
FRP	FRP L - PB L	0.20741	0.21759		FRP	FRP L - PB L	0.0759352	0.0774131		FRP	FRP L - PB L	-0.0983296	-0.103136
FRP	FRP L - PB R	-0.0690524	-0.0719243		FRP	FRP L - PB R	0.00788131	0.0103711		FRP	FRP L - PB R	-0.0437023	-0.046787
FRP	FRP L - PERI L	-0.0113745	-0.0105668		FRP	FRP L - PERI L	-0.0659392	-0.0670105		FRP	FRP L - PERI L	0.095625	0.09744
FRP	FRP L - PERI R	0.156656	0.158431		FRP	FRP L - PERI R	0.0480157	0.0487106		FRP	FRP L - PERI R	-0.108794	-0.110057
FRP	FRP L - PIR L	0.142817	0.161957		FRP	FRP L - PIR L	-0.0859848	-0.0913428		FRP	FRP L - PIR L	-0.0843098	-0.0924091
FRP	FRP L - PIR R	0.0570333	0.0659014		FRP	FRP L - PIR R	-0.180198	-0.19682		FRP	FRP L - PIR R	0.0479142	0.0563202
FRP	FRP L - PL L	-0.0696774	-0.179021		FRP	FRP L - PL L	0.0597223	0.155542		FRP	FRP L - PL L	-0.0447417	-0.0993823
FRP	FRP L - PL R	-0.089569	-0.215044		FRP	FRP L - PL R	0.0212651	0.075045		FRP	FRP L - PL R	-0.0466633	-0.134902
FRP	FRP L - PRNr L	0.165993	0.170107		FRP	FRP L - PRNr L	0.100595	0.10113		FRP	FRP L - PRNr L	-0.105826	-0.108864
FRP	FRP L - PRNr R	-0.034047	-0.0368943		FRP	FRP L - PRNr R	-0.0785664	-0.0766771		FRP	FRP L - PRNr R	-0.0403976	-0.0425865
FRP	FRP L - PTLp L	-0.105354	-0.111066		FRP	FRP L - PTLp L	0.153246	0.159176		FRP	FRP L - PTLp L	0.0173034	0.0147216
FRP	FRP L - PTLp R	-0.170072	-0.171981		FRP	FRP L - PTLp R	0.00861581	0.00892261		FRP	FRP L - PTLp R	-0.0309262	-0.031205
FRP	FRP L - RHP L	-0.0187614	-0.0191142		FRP	FRP L - RHP L	0.0983032	0.0999417		FRP	FRP L - RHP L	0.0699637	0.0722231
FRP	FRP L - RHP R	-0.118417	-0.120285		FRP	FRP L - RHP R	-0.0691536	-0.071482		FRP	FRP L - RHP R	0.178887	0.181729
FRP	FRP L - RSP L	-0.0564843	-0.0567845		FRP	FRP L - RSP L	0.131526	0.132272		FRP	FRP L - RSP L	0.0505583	0.0512091
FRP	FRP L - RSP R	-0.101877	-0.103533		FRP	FRP L - RSP R	0.101698	0.103688		FRP	FRP L - RSP R	0.00154893	0.000157532
FRP	FRP L - SC L	0.0602654	0.0634506		FRP	FRP L - SC L	0.206847	0.211908		FRP	FRP L - SC L	-0.115993	-0.119002
FRP	FRP L - SC R	-0.0611444	-0.0622983		FRP	FRP L - SC R	0.0950085	0.0971502		FRP	FRP L - SC R	-0.0239266	-0.0233009
FRP	FRP L - SN L	0.125416	0.129067		FRP	FRP L - SN L	0.0568525	0.0587117		FRP	FRP L - SN L	-0.0769202	-0.078726
FRP	FRP L - SN R	0.0374821	0.0403967		FRP	FRP L - SN R	-0.166928	-0.170438		FRP	FRP L - SN R	0.0554395	0.0572749
FRP	FRP L - SS L	-0.0542707	-0.0666833		FRP	FRP L - SS L	0.0740026	0.082635		FRP	FRP L - SS L	-0.0771256	-0.0845578
FRP	FRP L - SS R	-0.037816	-0.0338618		FRP	FRP L - SS R	-0.12977	-0.136852		FRP	FRP L - SS R	0.0367041	0.0402715
FRP	FRP L - STN L	0.00334152	0.00399044		FRP	FRP L - STN L	-0.0156206	-0.016969		FRP	FRP L - STN L	-0.104049	-0.106831
FRP	FRP L - STN R	-0.0426289	-0.0422835		FRP	FRP L - STN R	-0.0743629	-0.075683		FRP	FRP L - STN R	0.000564529	0.000193943
FRP	FRP L - TEa L	-0.135524	-0.140468		FRP	FRP L - TEa L	-0.00439237	-0.00150335		FRP	FRP L - TEa L	0.0903076	0.0965444
FRP	FRP L - TEa R	0.0442926	0.0441765		FRP	FRP L - TEa R	0.118404	0.12082		FRP	FRP L - TEa R	-0.0218954	-0.0234819
FRP	FRP L - TH L	0.0928656	0.0904348		FRP	FRP L - TH L	0.235062	0.25117		FRP	FRP L - TH L	-0.233089	-0.250063
FRP	FRP L - TH R	-0.0278161	-0.0283224		FRP	FRP L - TH R	0.0159303	0.0174713		FRP	FRP L - TH R	-0.0788792	-0.0807068
FRP	FRP L - VIS L	-0.112797	-0.11506		FRP	FRP L - VIS L	0.158633	0.161761		FRP	FRP L - VIS L	-0.0171436	-0.0173611
FRP	FRP L - VIS R	-0.144626	-0.147333		FRP	FRP L - VIS R	-0.00592391	-0.00659881		FRP	FRP L - VIS R	0.0400345	0.0410606
FRP	FRP L - VISC L	-0.0246578	-0.0251129		FRP	FRP L - VISC L	-0.0440521	-0.0430351		FRP	FRP L - VISC L	-0.0585747	-0.0689889
FRP	FRP L - VISC R	0.0164175	0.0132732		FRP	FRP L - VISC R	-0.0431113	-0.0384876		FRP	FRP L - VISC R	-0.105495	-0.112766
FRP	FRP L - VTA L	0.0101145	0.0108548		FRP	FRP L - VTA L	0.0519359	0.0531685		FRP	FRP L - VTA L	-0.0286205	-0.029471
FRP	FRP L - VTA R	0.00248353	0.00519359		FRP	FRP L - VTA R	-0.00858369	-0.0112891		FRP	FRP L - VTA R	0.0673732	0.0704692
FRP	FRP L - ZI L	0.0386539	0.040641		FRP	FRP L - ZI L	0.0280654	0.0293802		FRP	FRP L - ZI L	-0.139557	-0.142957
FRP	FRP L - ZI R	0.0103405	0.0116183		FRP	FRP L - ZI R	-0.101468	-0.103297		FRP	FRP L - ZI R	0.0362099	0.0365785
FRP	FRP R - ACA L	0.0731446	0.0897448		FRP	FRP R - ACA L	-0.0230931	-0.0287201		FRP	FRP R - ACA L	-0.00574822	-0.0128096
FRP	FRP R - ACA R	0.0496892	0.084998		FRP	FRP R - ACA R	-0.0474169	-0.0829151		FRP	FRP R - ACA R	0.0727065	0.111924
FRP	FRP R - ACB L	-0.0244216	-0.031939		FRP	FRP R - ACB L	-0.0176629	-0.0265882		FRP	FRP R - ACB L	-0.0947748	-0.106551
FRP	FRP R - ACB R	0.00777878	0.0110373		FRP	FRP R - ACB R	-0.041507	-0.0436381		FRP	FRP R - ACB R	0.0399587	0.0432295
FRP	FRP R - AI L	0.102145	0.106132		FRP	FRP R - AI L	-0.0374093	-0.0342796		FRP	FRP R - AI L	-0.219789	-0.241079
FRP	FRP R - AI R	-0.0122284	-0.013701		FRP	FRP R - AI R	-0.034552	-0.0402124		FRP	FRP R - AI R	-0.0158226	-0.0244404
FRP	FRP R - AMY L	0.0263867	0.0276568		FRP	FRP R - AMY L	-0.0166531	-0.0220313		FRP	FRP R - AMY L	-0.15614	-0.165027
FRP	FRP R - AMY R	0.075445	0.0803358		FRP	FRP R - AMY R	-0.242372	-0.249224		FRP	FRP R - AMY R	0.00795392	0.00726689
FRP	FRP R - AUD L	-0.0809633	-0.0834773		FRP	FRP R - AUD L	0.151557	0.154436		FRP	FRP R - AUD L	-0.0122327	-0.0128562
FRP	FRP R - AUD R	-0.0606775	-0.0625896		FRP	FRP R - AUD R	0.118504	0.12089		FRP	FRP R - AUD R	-0.171827	-0.175253
FRP	FRP R - CB L	0.00804821	0.0110747		FRP	FRP R - CB L	-0.02361	-0.0258694		FRP	FRP R - CB L	0.125364	0.126329
FRP	FRP R - CB R	0.0361926	0.0378394		FRP	FRP R - CB R	0.0386424	0.0371677		FRP	FRP R - CB R	0.0311426	0.0320078
FRP	FRP R - COA L	0.031333	0.0317288		FRP	FRP R - COA L	0.0674605	0.067564		FRP	FRP R - COA L	0.00173565	0.00146173
FRP	FRP R - COA R	0.0562897	0.0597161		FRP	FRP R - COA R	-0.208479	-0.213471		FRP	FRP R - COA R	0.0142404	0.013838
FRP	FRP R - CP L	-0.0722518	-0.0840178		FRP	FRP R - CP L	0.0250003	0.0322216		FRP	FRP R - CP L	-0.21046	-0.224274
FRP	FRP R - CP R	0.113064	0.131526		FRP	FRP R - CP R	-0.123194	-0.145666		FRP	FRP R - CP R	-0.0436368	-0.0423984
FRP	FRP R - CSm L	0.0312986	0.0312421		FRP	FRP R - CSm L	0.0674211	0.0681249		FRP	FRP R - CSm L	-0.0843172	-0.0857593
FRP	FRP R - CSm R	0.04316	0.044431		FRP	FRP R - CSm R	-0.0453134	-0.046605		FRP	FRP R - CSm R	-0.0874417	-0.0890007
FRP	FRP R - ECT L	-0.0409713	-0.0406213		FRP	FRP R - ECT L	0.0215921	0.0209366		FRP	FRP R - ECT L	0.0392064	0.0397738
FRP	FRP R - ECT R	0.146889	0.14891		FRP	FRP R - ECT R	0.0314711	0.0311147		FRP	FRP R - ECT R	-0.0992873	-0.0997185
FRP	FRP R - ENT L	-0.0179569	-0.0181014		FRP	FRP R - ENT L	0.0207341	0.0212531		FRP	FRP R - ENT L	0.0419414	0.0420699
FRP	FRP R - ENT R	0.0245178	0.0247917		FRP	FRP R - ENT R	-0.0112973	-0.011422		FRP	FRP R - ENT R	-0.00438481	-0.00441078
FRP	FRP R - FS L	-0.018234	-0.0265255		FRP	FRP R - FS L	0.0937044	0.110965		FRP	FRP R - FS L	-0.140241	-0.157101
FRP	FRP R - FS R	0.168604	0.18111		FRP	FRP R - FS R	-0.200996	-0.21796		FRP	FRP R - FS R	-0.0583624	-0.0611921
FRP	FRP R - GU L	0.0385918	0.0334789		FRP	FRP R - GU L	-0.0199676	-0.0147142		FRP	FRP R - GU L	-0.230384	-0.24669
FRP	FRP R - GU R	-0.0319565	-0.0384388		FRP	FRP R - GU R	-0.046767	-0.0546085		FRP	FRP R - GU R	-0.00827615	-0.0141786
FRP	FRP R - HIP L	0.0120749	0.0128512		FRP	FRP R - HIP L	0.175275	0.17722		FRP	FRP R - HIP L	0.0170367	0.0183736
FRP	FRP R - HIP R	0.00618989	0.00655324		FRP	FRP R - HIP R	-0.0941332	-0.0987817		FRP	FRP R - HIP R	-0.00700309	-0.00717097
FRP	FRP R - HT L	0.028627	0.030444		FRP	FRP R - HT L	-0.045129	-0.047132		FRP	FRP R - HT L	0.0228462	0.0242232
FRP	FRP R - HT R	0.0962119	0.109915		FRP	FRP R - HT R	-0.198604	-0.213413		FRP	FRP R - HT R	0.0865106	0.0943341
FRP	FRP R - IC L	-0.0634485	-0.0642435		FRP	FRP R - IC L	0.0803362	0.0805154		FRP	FRP R - IC L	0.0148957	0.0154202
FRP	FRP R - IC R	-0.017458	-0.0176367		FRP	FRP R - IC R	-0.0271648	-0.0273055		FRP	FRP R - IC R	-0.0114019	-0.0114597
FRP	FRP R - ILA L	0.0420825	0.0699647		FRP	FRP R - ILA L	0.0502972	0.0655068		FRP	FRP R - ILA L	-0.102802	-0.147698
FRP	FRP R - ILA R	-0.0663921	-0.106083		FRP	FRP R - ILA R	0.0571913	0.0854301		FRP	FRP R - ILA R	0.0316003	0.0736209
FRP	FRP R - LSX L	-0.156591	-0.163958		FRP	FRP R - LSX L	-0.0127375	-0.00932108		FRP	FRP R - LSX L	0.042896	0.0375481
FRP	FRP R - LSX R	-0.0343425	-0.0336651		FRP	FRP R - LSX R	-0.109992	-0.114761		FRP	FRP R - LSX R	0.0884026	0.093097
FRP	FRP R - MB R	-0.00985984	-0.00745104		FRP	FRP R - MB R	-0.120754	-0.124699		FRP	FRP R - MB R	0.023235	0.0248282
FRP	FRP R - MO L	0.152396	0.181198		FRP	FRP R - MO L	0.0238277	0.0404271		FRP	FRP R - MO L	-0.231656	-0.299112
FRP	FRP R - MO R	-0.027961	-0.031216		FRP	FRP R - MO R	-0.0703803	-0.115331		FRP	FRP R - MO R	0.0636149	0.0963775
FRP	FRP R - MOB R	0.0646792	0.120491		FRP	FRP R - MOB R	0.0489524	0.0949865		FRP	FRP R - MOB R	0.0111041	0.0471791
FRP	FRP R - MRN L	0.0516564	0.0522866		FRP	FRP R - MRN L	0.0738587	0.073543		FRP	FRP R - MRN L	-0.00770779	-0.00670406
FRP	FRP R - MRN R	0.00155968	0.00491998		FRP	FRP R - MRN R	-0.0704977	-0.0740739		FRP	FRP R - MRN R	-0.026519	-0.0285141
FRP	FRP R - MY L	-0.0386623	-0.0408043		FRP	FRP R - MY L	0.0409464	0.0425913		FRP	FRP R - MY L	-0.0821893	-0.0840323
FRP	FRP R - MY R	-0.0788913	-0.0820376		FRP	FRP R - MY R	0.0451301	0.0472836		FRP	FRP R - MY R	-0.0541214	-0.056281
FRP	FRP R - NBM L	-0.00150187	-0.00136771		FRP	FRP R - NBM L	-0.138516	-0.142612		FRP	FRP R - NBM L	-0.0356832	-0.0358815
FRP	FRP R - NBM R	0.141711	0.168846		FRP	FRP R - NBM R	-0.325845	-0.356861		FRP	FRP R - NBM R	0.0774245	0.0918818
FRP	FRP R - OLF L	0.106861	0.122146		FRP	FRP R - OLF L	0.0196775	0.02196		FRP	FRP R - OLF L	-0.0769692	-0.0878542
FRP	FRP R - OLF R	0.0877568	0.103141		FRP	FRP R - OLF R	-0.157871	-0.175887		FRP	FRP R - OLF R	0.0189228	0.0217044
FRP	FRP R - ORB L	0.120485	0.221287		FRP	FRP R - ORB L	0.0209112	0.0436822		FRP	FRP R - ORB L	-0.117128	-0.181775
FRP	FRP R - ORB R	-0.0663267	-0.172802		FRP	FRP R - ORB R	0.0287951	0.0790073		FRP	FRP R - ORB R	0.0232322	0.0931717
FRP	FRP R - OT L	-0.0193064	-0.0246302		FRP	FRP R - OT L	-0.0244721	-0.0289535		FRP	FRP R - OT L	-0.0696026	-0.0790195
FRP	FRP R - OT R	-0.0101525	-0.0118657		FRP	FRP R - OT R	-0.0995325	-0.105737		FRP	FRP R - OT R	-0.0178194	-0.0173585
FRP	FRP R - PAG L	0.0173605	0.0158254		FRP	FRP R - PAG L	0.0340324	0.0359116		FRP	FRP R - PAG L	-0.0300412	-0.0277006
FRP	FRP R - PAG R	-0.0306657	-0.0319071		FRP	FRP R - PAG R	-0.0224926	-0.0218181		FRP	FRP R - PAG R	-0.0108194	-0.00830065
FRP	FRP R - PALc L	-0.143752	-0.152618		FRP	FRP R - PALc L	-0.0843772	-0.0855743		FRP	FRP R - PALc L	-0.0517921	-0.05791
FRP	FRP R - PALc R	0.0823354	0.0941793		FRP	FRP R - PALc R	-0.212705	-0.230537		FRP	FRP R - PALc R	0.0296153	0.0396787
FRP	FRP R - PALd L	-0.112862	-0.120496		FRP	FRP R - PALd L	0.00244675	0.00203394		FRP	FRP R - PALd L	-0.191408	-0.1992
FRP	FRP R - PALd R	0.132832	0.135431		FRP	FRP R - PALd R	-0.136926	-0.139182		FRP	FRP R - PALd R	-0.106292	-0.106917
FRP	FRP R - PALm L	-0.0862611	-0.0935868		FRP	FRP R - PALm L	-0.0661535	-0.0661633		FRP	FRP R - PALm L	0.0176482	0.0133631
FRP	FRP R - PALm R	-0.0215533	-0.0232893		FRP	FRP R - PALm R	-0.134983	-0.141451		FRP	FRP R - PALm R	0.0150591	0.0167394
FRP	FRP R - PALv L	-0.00604016	-0.0119288		FRP	FRP R - PALv L	-0.0155842	-0.0163738		FRP	FRP R - PALv L	-0.12177	-0.136387
FRP	FRP R - PALv R	0.106424	0.118123		FRP	FRP R - PALv R	-0.223032	-0.241489		FRP	FRP R - PALv R	-0.00741312	-0.00218081
FRP	FRP R - PB L	0.12864	0.131247		FRP	FRP R - PB L	0.0292979	0.029577		FRP	FRP R - PB L	-0.0289907	-0.0294097
FRP	FRP R - PB R	0.034627	0.0353618		FRP	FRP R - PB R	0.00105552	0.000284145		FRP	FRP R - PB R	-0.0402171	-0.0413853
FRP	FRP R - PERI L	-0.0340476	-0.0347533		FRP	FRP R - PERI L	-0.0134012	-0.013247		FRP	FRP R - PERI L	0.106918	0.109047
FRP	FRP R - PERI R	0.135037	0.135954		FRP	FRP R - PERI R	0.0559957	0.0560657		FRP	FRP R - PERI R	-0.155058	-0.156119
FRP	FRP R - PIR L	0.141347	0.155162		FRP	FRP R - PIR L	-0.021087	-0.0215484		FRP	FRP R - PIR L	-0.124947	-0.135042
FRP	FRP R - PIR R	0.113292	0.131076		FRP	FRP R - PIR R	-0.142194	-0.161505		FRP	FRP R - PIR R	0.00129856	0.00116846
FRP	FRP R - PL L	0.0661647	0.220402		FRP	FRP R - PL L	0.0376748	0.0305429		FRP	FRP R - PL L	-0.120777	-0.218843
FRP	FRP R - PL R	-0.0416425	-0.0330821		FRP	FRP R - PL R	0.0259408	-0.013623		FRP	FRP R - PL R	-0.0440088	-0.0549492
FRP	FRP R - PRNr L	0.0154751	0.0154734		FRP	FRP R - PRNr L	0.17087	0.173565		FRP	FRP R - PRNr L	-0.0523336	-0.0534286
FRP	FRP R - PRNr R	-0.0123521	-0.0152862		FRP	FRP R - PRNr R	-0.0508215	-0.0480737		FRP	FRP R - PRNr R	-0.0735443	-0.0771223
FRP	FRP R - PTLp L	0.00230612	0.000159764		FRP	FRP R - PTLp L	0.126498	0.130649		FRP	FRP R - PTLp L	-0.103336	-0.107758
FRP	FRP R - PTLp R	-0.0689495	-0.0699807		FRP	FRP R - PTLp R	0.0671936	0.0691192		FRP	FRP R - PTLp R	-0.102822	-0.105163
FRP	FRP R - RHP L	-0.0226651	-0.0222837		FRP	FRP R - RHP L	0.0822695	0.0833999		FRP	FRP R - RHP L	0.057817	0.0588098
FRP	FRP R - RHP R	0.0169817	0.017135		FRP	FRP R - RHP R	-0.11519	-0.118525		FRP	FRP R - RHP R	0.100366	0.103262
FRP	FRP R - RSP L	-0.0215211	-0.0215165		FRP	FRP R - RSP L	0.0731916	0.073414		FRP	FRP R - RSP L	-0.0182596	-0.0184433
FRP	FRP R - RSP R	0.0178168	0.0181653		FRP	FRP R - RSP R	0.0226985	0.02545		FRP	FRP R - RSP R	-0.0576049	-0.0605402
FRP	FRP R - SC L	-0.0754972	-0.0765183		FRP	FRP R - SC L	0.13821	0.139668		FRP	FRP R - SC L	-0.0291548	-0.0288413
FRP	FRP R - SC R	-0.0969874	-0.100975		FRP	FRP R - SC R	-0.00152126	-0.00319855		FRP	FRP R - SC R	-0.000990187	0.00255255
FRP	FRP R - SN L	0.101329	0.103408		FRP	FRP R - SN L	0.0900898	0.0921658		FRP	FRP R - SN L	-0.147114	-0.149263
FRP	FRP R - SN R	-0.0270132	-0.0274139		FRP	FRP R - SN R	-0.114479	-0.116169		FRP	FRP R - SN R	0.0658597	0.0669472
FRP	FRP R - SS L	0.0231328	0.01833		FRP	FRP R - SS L	0.0556681	0.0603964		FRP	FRP R - SS L	-0.22838	-0.237994
FRP	FRP R - SS R	0.0434021	0.0717603		FRP	FRP R - SS R	-0.142883	-0.17689		FRP	FRP R - SS R	0.0676529	0.088487
FRP	FRP R - STN L	-0.059617	-0.0626743		FRP	FRP R - STN L	0.084141	0.087974		FRP	FRP R - STN L	-0.0468748	-0.0477115
FRP	FRP R - STN R	0.0190159	0.0197895		FRP	FRP R - STN R	-0.0792467	-0.0803857		FRP	FRP R - STN R	-0.0626196	-0.0637579
FRP	FRP R - TEa L	-0.0458169	-0.0444896		FRP	FRP R - TEa L	0.0146606	0.0124875		FRP	FRP R - TEa L	0.0358985	0.0364061
FRP	FRP R - TEa R	0.145651	0.148967		FRP	FRP R - TEa R	0.0391841	0.0389621		FRP	FRP R - TEa R	-0.0770707	-0.077575
FRP	FRP R - TH L	-0.0670078	-0.075276		FRP	FRP R - TH L	0.220886	0.232174		FRP	FRP R - TH L	-0.142805	-0.153386
FRP	FRP R - TH R	-0.0735947	-0.0764301		FRP	FRP R - TH R	0.0351056	0.0374838		FRP	FRP R - TH R	-0.0940757	-0.0973865
FRP	FRP R - VIS L	-0.0789466	-0.0791691		FRP	FRP R - VIS L	0.135734	0.138885		FRP	FRP R - VIS L	-0.0489165	-0.0508903
FRP	FRP R - VIS R	0.00450957	0.00418173		FRP	FRP R - VIS R	-0.0589622	-0.0610792		FRP	FRP R - VIS R	-0.0338668	-0.0324745
FRP	FRP R - VISC L	0.0310779	0.0301417		FRP	FRP R - VISC L	-0.050147	-0.0502425		FRP	FRP R - VISC L	-0.166272	-0.174641
FRP	FRP R - VISC R	0.100206	0.0983562		FRP	FRP R - VISC R	-0.0747831	-0.0724739		FRP	FRP R - VISC R	-0.172612	-0.186988
FRP	FRP R - VTA L	-0.00897352	-0.00916396		FRP	FRP R - VTA L	0.0755652	0.0768295		FRP	FRP R - VTA L	-0.0894654	-0.0900681
FRP	FRP R - VTA R	-0.0481114	-0.0476742		FRP	FRP R - VTA R	0.00493252	0.00440004		FRP	FRP R - VTA R	0.0120928	0.012683
FRP	FRP R - ZI L	-0.0423138	-0.0433107		FRP	FRP R - ZI L	0.0922432	0.0951419		FRP	FRP R - ZI L	-0.0484405	-0.0493294
FRP	FRP R - ZI R	0.032408	0.0325836		FRP	FRP R - ZI R	-0.10704	-0.108765		FRP	FRP R - ZI R	-0.0433318	-0.0446058
FS	FS L - AMY L	-0.10047	-0.1037		FS	FS L - AMY L	-0.0658288	-0.06652		FS	FS L - AMY L	0.04537	0.0445901
FS	FS L - AMY R	0.1068	0.1142		FS	FS L - AMY R	-0.0195157	-0.0136612		FS	FS L - AMY R	-0.0260726	-0.0319911
FS	FS L - CB L	-0.0223324	-0.0233497		FS	FS L - CB L	0.0649116	0.0688238		FS	FS L - CB L	0.178939	0.183569
FS	FS L - CB R	0.076922	0.0773322		FS	FS L - CB R	-0.0322426	-0.0341568		FS	FS L - CB R	-0.0377076	-0.0391861
FS	FS L - COA L	-0.0919133	-0.0976204		FS	FS L - COA L	-0.072271	-0.0810329		FS	FS L - COA L	-0.0483448	-0.0577012
FS	FS L - COA R	-0.0182627	-0.0238373		FS	FS L - COA R	0.025761	0.0206162		FS	FS L - COA R	0.0667646	0.0740917
FS	FS L - CSm L	0.248395	0.250623		FS	FS L - CSm L	0.0135129	0.0137802		FS	FS L - CSm L	-0.127585	-0.128919
FS	FS L - CSm R	0.19884	0.205835		FS	FS L - CSm R	0.0334135	0.0333621		FS	FS L - CSm R	-0.0185794	-0.0153361
FS	FS L - FS R	0.0817862	0.0856621		FS	FS L - FS R	-0.00562139	-0.00199824		FS	FS L - FS R	0.130846	0.135592
FS	FS L - HT L	0.202362	0.212271		FS	FS L - HT L	-0.0346897	-0.0379412		FS	FS L - HT L	-0.116603	-0.120834
FS	FS L - HT R	0.214279	0.221177		FS	FS L - HT R	0.00541916	0.00363039		FS	FS L - HT R	-0.0216619	-0.0205113
FS	FS L - IC L	-0.03735	-0.0424172		FS	FS L - IC L	0.0113198	0.00744513		FS	FS L - IC L	0.105446	0.110333
FS	FS L - IC R	0.111562	0.11328		FS	FS L - IC R	-0.0329117	-0.0339036		FS	FS L - IC R	-0.132216	-0.134076
FS	FS L - LSX L	0.178703	0.18077		FS	FS L - LSX L	-0.0892674	-0.0859616		FS	FS L - LSX L	-0.164983	-0.171426
FS	FS L - LSX R	0.0831313	0.0825269		FS	FS L - LSX R	-0.028706	-0.0254066		FS	FS L - LSX R	-0.152709	-0.157748
FS	FS L - MB R	0.0856544	0.0932027		FS	FS L - MB R	-0.0612976	-0.0646572		FS	FS L - MB R	0.0258591	0.029342
FS	FS L - MRN L	0.153672	0.161824		FS	FS L - MRN L	-0.158876	-0.167047		FS	FS L - MRN L	-0.0598212	-0.0582042
FS	FS L - MRN R	0.121522	0.128333		FS	FS L - MRN R	-0.0580827	-0.0620068		FS	FS L - MRN R	-0.033226	-0.031731
FS	FS L - MY L	0.210346	0.214737		FS	FS L - MY L	-0.0839269	-0.0846957		FS	FS L - MY L	-0.0248053	-0.0249079
FS	FS L - MY R	0.118706	0.119956		FS	FS L - MY R	-0.0606599	-0.0611695		FS	FS L - MY R	0.0198906	0.0200484
FS	FS L - NBM L	0.0291918	0.049656		FS	FS L - NBM L	0.0252891	0.0433599		FS	FS L - NBM L	-0.0470431	-0.0718048
FS	FS L - NBM R	0.0683122	0.0752713		FS	FS L - NBM R	-0.117266	-0.123517		FS	FS L - NBM R	0.155254	0.161442
FS	FS L - OLF L	-0.00613976	0.00311346		FS	FS L - OLF L	-0.0712846	-0.0802577		FS	FS L - OLF L	-0.0793525	-0.0948078
FS	FS L - OLF R	0.0576995	0.0605885		FS	FS L - OLF R	0.0157383	0.0174097		FS	FS L - OLF R	-0.0366736	-0.038544
FS	FS L - OT L	0.114394	0.149719		FS	FS L - OT L	-0.0601052	-0.0883181		FS	FS L - OT L	-0.00297279	-0.0121524
FS	FS L - OT R	0.139758	0.147609		FS	FS L - OT R	-0.0365124	-0.0413796		FS	FS L - OT R	0.0785391	0.0790515
FS	FS L - PAG L	0.150137	0.152851		FS	FS L - PAG L	-0.041547	-0.0431713		FS	FS L - PAG L	0.00108185	0.00239668
FS	FS L - PAG R	0.184568	0.189474		FS	FS L - PAG R	-0.0658686	-0.0687839		FS	FS L - PAG R	-0.0142464	-0.012993
FS	FS L - PALc L	0.0883859	0.121671		FS	FS L - PALc L	0.016896	0.0462891		FS	FS L - PALc L	-0.123531	-0.190909
FS	FS L - PALc R	0.166718	0.170564		FS	FS L - PALc R	0.0158294	0.0148796		FS	FS L - PALc R	0.0134346	0.0142136
FS	FS L - PALd L	-0.00105911	0.000370039		FS	FS L - PALd L	-0.003683	-0.00416575		FS	FS L - PALd L	0.0296161	0.0316186
FS	FS L - PALd R	0.074174	0.103783		FS	FS L - PALd R	0.105233	0.140676		FS	FS L - PALd R	-0.102289	-0.133512
FS	FS L - PALm L	0.131736	0.170882		FS	FS L - PALm L	-0.0706157	-0.0832725		FS	FS L - PALm L	-0.0692477	-0.0858251
FS	FS L - PALm R	0.170051	0.18079		FS	FS L - PALm R	-0.0708704	-0.0778016		FS	FS L - PALm R	0.0613422	0.0667001
FS	FS L - PALv L	0.0780502	0.165847		FS	FS L - PALv L	-0.0804604	-0.151945		FS	FS L - PALv L	-0.00581171	-0.00583077
FS	FS L - PALv R	0.185735	0.192599		FS	FS L - PALv R	-0.0231725	-0.0262801		FS	FS L - PALv R	0.0596099	0.0610208
FS	FS L - PB L	0.0801454	0.0809034		FS	FS L - PB L	0.0772408	0.0783674		FS	FS L - PB L	0.0252312	0.0250725
FS	FS L - PB R	0.142366	0.146023		FS	FS L - PB R	0.0610593	0.066052		FS	FS L - PB R	-0.0378131	-0.0396196
FS	FS L - PRNr L	0.177668	0.193252		FS	FS L - PRNr L	0.0613854	0.06689		FS	FS L - PRNr L	-0.122881	-0.136459
FS	FS L - PRNr R	0.0285721	0.0420222		FS	FS L - PRNr R	0.0238799	0.0202093		FS	FS L - PRNr R	0.165705	0.182633
FS	FS L - RHP L	-0.111845	-0.113262		FS	FS L - RHP L	0.103718	0.105143		FS	FS L - RHP L	-0.00294358	-0.00364396
FS	FS L - RHP R	0.00406165	0.00360248		FS	FS L - RHP R	-0.121973	-0.125318		FS	FS L - RHP R	-0.0645652	-0.0645804
FS	FS L - SC L	-0.100341	-0.102908		FS	FS L - SC L	0.0787198	0.0783566		FS	FS L - SC L	0.00299606	0.00424051
FS	FS L - SC R	0.0783193	0.0795105		FS	FS L - SC R	-0.0717562	-0.0728395		FS	FS L - SC R	-0.0628789	-0.0641242
FS	FS L - SN L	0.0961132	0.0988316		FS	FS L - SN L	0.0681958	0.0685012		FS	FS L - SN L	-0.149637	-0.155068
FS	FS L - SN R	-0.0759593	-0.07739		FS	FS L - SN R	-0.0385701	-0.0381248		FS	FS L - SN R	0.0737679	0.0750231
FS	FS L - STN L	0.0570599	0.0606968		FS	FS L - STN L	-0.0292612	-0.0329227		FS	FS L - STN L	-0.0547297	-0.0558178
FS	FS L - STN R	0.179688	0.183943		FS	FS L - STN R	-0.0204103	-0.0221747		FS	FS L - STN R	-0.0749733	-0.0768092
FS	FS L - TH L	0.0799034	0.0806828		FS	FS L - TH L	-0.107682	-0.108523		FS	FS L - TH L	0.000510268	0.000587889
FS	FS L - TH R	0.290242	0.301847		FS	FS L - TH R	-0.0532798	-0.0578672		FS	FS L - TH R	-0.0835689	-0.0852778
FS	FS L - VTA L	0.248519	0.254098		FS	FS L - VTA L	0.0342759	0.0358921		FS	FS L - VTA L	-0.288728	-0.294925
FS	FS L - VTA R	-0.0282024	-0.0283753		FS	FS L - VTA R	0.050727	0.0508459		FS	FS L - VTA R	0.0239825	0.0239744
FS	FS L - ZI L	0.155786	0.160626		FS	FS L - ZI L	-0.0638422	-0.0669054		FS	FS L - ZI L	-0.119991	-0.121503
FS	FS L - ZI R	0.196779	0.205135		FS	FS L - ZI R	0.0234736	0.026758		FS	FS L - ZI R	-0.0094292	-0.00594434
FS	FS R - AMY L	-0.0704561	-0.0705573		FS	FS R - AMY L	0.148414	0.158121		FS	FS R - AMY L	-0.0241833	-0.0272545
FS	FS R - AMY R	-0.102691	-0.135276		FS	FS R - AMY R	-0.142141	-0.172529		FS	FS R - AMY R	0.0744647	0.0973
FS	FS R - CB L	0.169225	0.172609		FS	FS R - CB L	-0.0437335	-0.0457948		FS	FS R - CB L	-0.0993184	-0.102079
FS	FS R - CB R	0.0338936	0.0336254		FS	FS R - CB R	0.162802	0.164804		FS	FS R - CB R	0.0047793	0.00613996
FS	FS R - COA L	0.146201	0.148826		FS	FS R - COA L	0.0657856	0.0660842		FS	FS R - COA L	-0.0909103	-0.0916398
FS	FS R - COA R	-0.0686238	-0.0736819		FS	FS R - COA R	-0.119744	-0.138249		FS	FS R - COA R	0.0178844	0.0150903
FS	FS R - CSm L	-0.135522	-0.139455		FS	FS R - CSm L	-0.0408998	-0.0406008		FS	FS R - CSm L	0.0617555	0.0654666
FS	FS R - CSm R	-0.127248	-0.128654		FS	FS R - CSm R	-0.0302496	-0.0307632		FS	FS R - CSm R	-0.00313191	-0.00298733
FS	FS R - HT L	-0.164786	-0.168075		FS	FS R - HT L	-0.0378758	-0.0395052		FS	FS R - HT L	0.0721146	0.072452
FS	FS R - HT R	-0.213622	-0.256503		FS	FS R - HT R	-0.122416	-0.151403		FS	FS R - HT R	0.0875696	0.0984179
FS	FS R - IC L	0.0411376	0.0413704		FS	FS R - IC L	0.0455903	0.0457927		FS	FS R - IC L	-0.027055	-0.0277923
FS	FS R - IC R	-0.102818	-0.104341		FS	FS R - IC R	0.200117	0.202615		FS	FS R - IC R	0.0413415	0.0419583
FS	FS R - LSX L	0.0216026	0.0206299		FS	FS R - LSX L	-0.00109214	0.000259669		FS	FS R - LSX L	0.10003	0.109188
FS	FS R - LSX R	0.117495	0.131418		FS	FS R - LSX R	-0.0606925	-0.0681256		FS	FS R - LSX R	-0.0506556	-0.0542889
FS	FS R - MB R	-0.164752	-0.166656		FS	FS R - MB R	0.0170433	0.0168832		FS	FS R - MB R	0.019816	0.0211288
FS	FS R - MRN L	-0.0501961	-0.0504385		FS	FS R - MRN L	0.211549	0.213729		FS	FS R - MRN L	0.0715536	0.0725363
FS	FS R - MRN R	-0.106041	-0.108453		FS	FS R - MRN R	0.109727	0.112326		FS	FS R - MRN R	-0.0088315	-0.00698466
FS	FS R - MY L	-0.163097	-0.165637		FS	FS R - MY L	-0.010109	-0.0110706		FS	FS R - MY L	-0.1364	-0.139453
FS	FS R - MY R	-0.151052	-0.152526		FS	FS R - MY R	-0.0354747	-0.0359084		FS	FS R - MY R	-0.0887557	-0.0903882
FS	FS R - NBM L	0.048649	0.0480176		FS	FS R - NBM L	-0.101103	-0.102937		FS	FS R - NBM L	0.120119	0.122013
FS	FS R - NBM R	-0.04134	-0.118118		FS	FS R - NBM R	0.00644551	0.0466114		FS	FS R - NBM R	-0.00862818	-0.0433437
FS	FS R - OLF L	0.114582	0.118781		FS	FS R - OLF L	0.0546265	0.0569883		FS	FS R - OLF L	-0.0454877	-0.0476838
FS	FS R - OLF R	-0.0536286	-0.0620216		FS	FS R - OLF R	-0.133935	-0.161853		FS	FS R - OLF R	0.0842591	0.101621
FS	FS R - OT L	-0.0443745	-0.0479664		FS	FS R - OT L	0.0391195	0.0421896		FS	FS R - OT L	0.122183	0.127637
FS	FS R - OT R	-0.102981	-0.168775		FS	FS R - OT R	-0.0276738	-0.0281744		FS	FS R - OT R	0.0400304	0.0504708
FS	FS R - PAG L	-0.0859702	-0.0886782		FS	FS R - PAG L	0.160126	0.163172		FS	FS R - PAG L	0.0826805	0.0854856
FS	FS R - PAG R	-0.130308	-0.134548		FS	FS R - PAG R	0.180381	0.184681		FS	FS R - PAG R	0.0304786	0.034186
FS	FS R - PALc L	-0.0881687	-0.0904889		FS	FS R - PALc L	-0.030186	-0.0295671		FS	FS R - PALc L	0.278158	0.281637
FS	FS R - PALc R	-0.0478068	-0.100644		FS	FS R - PALc R	-0.0435242	-0.0608775		FS	FS R - PALc R	-0.0319219	-0.0752111
FS	FS R - PALd L	-0.0450648	-0.0444016		FS	FS R - PALd L	-0.00994077	-0.0100958		FS	FS R - PALd L	0.124147	0.128126
FS	FS R - PALd R	0.106333	0.129341		FS	FS R - PALd R	-0.17641	-0.195528		FS	FS R - PALd R	-0.036772	-0.0451744
FS	FS R - PALm L	-0.0356573	-0.0379654		FS	FS R - PALm L	0.0159498	0.0163317		FS	FS R - PALm L	0.116921	0.122244
FS	FS R - PALm R	-0.128336	-0.206246		FS	FS R - PALm R	0.0433134	0.0694929		FS	FS R - PALm R	0.0401876	0.0582581
FS	FS R - PALv L	-0.0201057	-0.0217066		FS	FS R - PALv L	0.0837272	0.085851		FS	FS R - PALv L	0.107119	0.109659
FS	FS R - PALv R	-0.0652101	-0.210398		FS	FS R - PALv R	-0.037341	-0.0517813		FS	FS R - PALv R	0.0294472	0.0520057
FS	FS R - PB L	-0.0146188	-0.0144114		FS	FS R - PB L	0.0122408	0.0123399		FS	FS R - PB L	0.049714	0.0499105
FS	FS R - PB R	-0.166039	-0.167567		FS	FS R - PB R	0.116673	0.118239		FS	FS R - PB R	0.00421093	0.0036335
FS	FS R - PRNr L	0.0240722	0.0251179		FS	FS R - PRNr L	-0.0542591	-0.0569456		FS	FS R - PRNr L	-0.014894	-0.0172171
FS	FS R - PRNr R	-0.148316	-0.151866		FS	FS R - PRNr R	-0.0297144	-0.0324581		FS	FS R - PRNr R	-0.0493453	-0.0504442
FS	FS R - RHP L	0.227556	0.232412		FS	FS R - RHP L	0.0123994	0.0153972		FS	FS R - RHP L	0.0815037	0.0858202
FS	FS R - RHP R	-0.00311848	-0.00302925		FS	FS R - RHP R	0.137292	0.138531		FS	FS R - RHP R	0.0312087	0.0314739
FS	FS R - SC L	0.143044	0.145007		FS	FS R - SC L	0.143122	0.145312		FS	FS R - SC L	-0.0321217	-0.0324848
FS	FS R - SC R	-0.0838577	-0.0853295		FS	FS R - SC R	0.203607	0.207395		FS	FS R - SC R	0.0258747	0.0264134
FS	FS R - SN L	-0.113894	-0.120395		FS	FS R - SN L	0.0216244	0.0206777		FS	FS R - SN L	-0.011979	-0.0117488
FS	FS R - SN R	0.0592562	0.0577453		FS	FS R - SN R	-0.146316	-0.159335		FS	FS R - SN R	0.0324881	0.035022
FS	FS R - STN L	-0.123664	-0.124808		FS	FS R - STN L	0.0106071	0.0104422		FS	FS R - STN L	-0.0129977	-0.0129241
FS	FS R - STN R	-0.198843	-0.214512		FS	FS R - STN R	-0.101655	-0.110985		FS	FS R - STN R	0.0426924	0.0435416
FS	FS R - TH L	-0.095139	-0.100882		FS	FS R - TH L	0.192375	0.200356		FS	FS R - TH L	0.0843371	0.0828302
FS	FS R - TH R	-0.28542	-0.295208		FS	FS R - TH R	0.0160556	0.0131946		FS	FS R - TH R	0.0332114	0.0301865
FS	FS R - VTA L	-0.113018	-0.113619		FS	FS R - VTA L	-0.0481076	-0.0486917		FS	FS R - VTA L	0.00323679	0.00301108
FS	FS R - VTA R	-0.231911	-0.240935		FS	FS R - VTA R	-0.0734472	-0.0812961		FS	FS R - VTA R	0.0592865	0.0652894
FS	FS R - ZI L	-0.143537	-0.144799		FS	FS R - ZI L	0.0185899	0.0187863		FS	FS R - ZI L	0.0589593	0.0592683
FS	FS R - ZI R	-0.27413	-0.315538		FS	FS R - ZI R	-0.121959	-0.154598		FS	FS R - ZI R	0.0680944	0.058647
GU	GU L - ACA L	-0.0486225	-0.0564276		GU	GU L - ACA L	-0.147507	-0.152766		GU	GU L - ACA L	-0.0560721	-0.0638362
GU	GU L - ACA R	-0.00555295	-0.00734412		GU	GU L - ACA R	-0.184153	-0.189247		GU	GU L - ACA R	-0.0988206	-0.102277
GU	GU L - ACB L	0.0850181	0.0969658		GU	GU L - ACB L	0.0662201	0.0830073		GU	GU L - ACB L	-0.138046	-0.167448
GU	GU L - ACB R	0.15701	0.164427		GU	GU L - ACB R	-0.191122	-0.204619		GU	GU L - ACB R	-0.0918588	-0.0885905
GU	GU L - AI L	-0.00558382	-0.0701995		GU	GU L - AI L	0.0192464	0.142827		GU	GU L - AI L	0.00974875	0.0654938
GU	GU L - AI R	-0.0230043	-0.0294905		GU	GU L - AI R	0.0172846	0.0190215		GU	GU L - AI R	-0.00478236	-0.00119386
GU	GU L - AMY L	-0.155796	-0.159786		GU	GU L - AMY L	0.154387	0.156887		GU	GU L - AMY L	-0.115074	-0.115768
GU	GU L - AMY R	0.113611	0.118053		GU	GU L - AMY R	-0.133323	-0.138524		GU	GU L - AMY R	0.01086	0.0144652
GU	GU L - AUD L	9.65627e-05	-0.000100263		GU	GU L - AUD L	0.151677	0.156892		GU	GU L - AUD L	0.0870258	0.0909051
GU	GU L - AUD R	-0.0982507	-0.104056		GU	GU L - AUD R	0.0867014	0.0900542		GU	GU L - AUD R	-0.197324	-0.203428
GU	GU L - CB L	0.0463091	0.0477284		GU	GU L - CB L	-0.0623189	-0.0625128		GU	GU L - CB L	0.182142	0.184341
GU	GU L - CB R	0.0166264	0.017445		GU	GU L - CB R	0.0258029	0.0258627		GU	GU L - CB R	0.0924549	0.0926829
GU	GU L - COA L	0.0378745	0.0373682		GU	GU L - COA L	-0.139705	-0.141231		GU	GU L - COA L	-0.0245216	-0.0239305
GU	GU L - COA R	0.0388808	0.0395708		GU	GU L - COA R	-0.0130391	-0.0136522		GU	GU L - COA R	0.0237558	0.0243943
GU	GU L - CP L	-0.0330649	-0.154407		GU	GU L - CP L	0.0764681	0.29178		GU	GU L - CP L	0.00176673	0.029243
GU	GU L - CP R	0.103106	0.110743		GU	GU L - CP R	-0.0691356	-0.0802294		GU	GU L - CP R	-0.0775937	-0.0776643
GU	GU L - CSm L	0.150846	0.154737		GU	GU L - CSm L	0.0130565	0.0118347		GU	GU L - CSm L	-0.0307105	-0.0308033
GU	GU L - CSm R	0.083355	0.0857214		GU	GU L - CSm R	0.0859046	0.0865818		GU	GU L - CSm R	0.0162309	0.0185408
GU	GU L - ECT L	0.00927413	0.00622437		GU	GU L - ECT L	0.160916	0.164688		GU	GU L - ECT L	0.022082	0.0244563
GU	GU L - ECT R	-0.103959	-0.111988		GU	GU L - ECT R	0.0985797	0.106624		GU	GU L - ECT R	-0.127724	-0.135657
GU	GU L - ENT L	0.129514	0.13013		GU	GU L - ENT L	-0.122282	-0.123144		GU	GU L - ENT L	0.00224001	0.00195718
GU	GU L - ENT R	-0.112501	-0.114878		GU	GU L - ENT R	0.00991048	0.0109405		GU	GU L - ENT R	0.0432856	0.0424175
GU	GU L - FS L	-0.0264429	-0.0324779		GU	GU L - FS L	0.155172	0.192855		GU	GU L - FS L	-0.119786	-0.148493
GU	GU L - FS R	0.146915	0.155912		GU	GU L - FS R	-0.158115	-0.166314		GU	GU L - FS R	0.00464698	0.00991324
GU	GU L - GU R	-0.0704311	-0.0809815		GU	GU L - GU R	0.0210822	0.0259012		GU	GU L - GU R	0.0363415	0.0395742
GU	GU L - HIP L	0.128225	0.131772		GU	GU L - HIP L	0.109344	0.111895		GU	GU L - HIP L	0.0137164	0.0166214
GU	GU L - HIP R	-0.113263	-0.114582		GU	GU L - HIP R	0.052345	0.0535707		GU	GU L - HIP R	-0.0948981	-0.0966795
GU	GU L - HT L	-0.0628625	-0.0631417		GU	GU L - HT L	0.075794	0.0769075		GU	GU L - HT L	-0.0871286	-0.0889675
GU	GU L - HT R	-0.000500338	-0.000348832		GU	GU L - HT R	-0.00421422	-0.00453115		GU	GU L - HT R	-0.0293292	-0.0296107
GU	GU L - IC L	0.0582245	0.0593238		GU	GU L - IC L	0.0578437	0.0556585		GU	GU L - IC L	0.000579812	-0.000226533
GU	GU L - IC R	-0.0706634	-0.0715863		GU	GU L - IC R	0.0672005	0.0680417		GU	GU L - IC R	-0.0377491	-0.0402404
GU	GU L - ILA L	0.0587857	0.0449106		GU	GU L - ILA L	0.000394682	0.0126932		GU	GU L - ILA L	-0.268877	-0.315676
GU	GU L - ILA R	0.0367832	0.0239368		GU	GU L - ILA R	-0.0326188	-0.0239257		GU	GU L - ILA R	-0.214263	-0.233924
GU	GU L - LSX L	0.0265394	0.0189749		GU	GU L - LSX L	-0.120454	-0.124676		GU	GU L - LSX L	-0.177538	-0.189839
GU	GU L - LSX R	0.102276	0.105983		GU	GU L - LSX R	-0.210334	-0.221791		GU	GU L - LSX R	-0.180122	-0.187155
GU	GU L - MB R	0.00133593	0.00249954		GU	GU L - MB R	0.0550003	0.0581914		GU	GU L - MB R	-0.00447032	-0.00674695
GU	GU L - MOB R	0.0457319	0.0440301		GU	GU L - MOB R	0.0475883	0.0547726		GU	GU L - MOB R	-0.245675	-0.280563
GU	GU L - MRN L	0.17793	0.193467		GU	GU L - MRN L	-0.0134119	-0.0234272		GU	GU L - MRN L	-0.0616716	-0.0606114
GU	GU L - MRN R	0.0374953	0.0362733		GU	GU L - MRN R	0.118798	0.127879		GU	GU L - MRN R	-0.0333213	-0.0337321
GU	GU L - MY L	-0.100523	-0.103868		GU	GU L - MY L	0.0323218	0.0354345		GU	GU L - MY L	-0.0325959	-0.0357054
GU	GU L - MY R	-0.0894939	-0.0912619		GU	GU L - MY R	0.0224828	0.0237005		GU	GU L - MY R	-0.00579021	-0.00707392
GU	GU L - NBM L	-0.0854695	-0.0921066		GU	GU L - NBM L	0.00741692	0.0087519		GU	GU L - NBM L	-0.0469049	-0.0515376
GU	GU L - NBM R	0.0780004	0.0845102		GU	GU L - NBM R	-0.217495	-0.225829		GU	GU L - NBM R	0.0268	0.0293087
GU	GU L - OLF L	0.053852	0.0551384		GU	GU L - OLF L	-0.00704817	-0.00641138		GU	GU L - OLF L	-0.142666	-0.145903
GU	GU L - OLF R	0.0734574	0.0765914		GU	GU L - OLF R	-0.0191532	-0.0199261		GU	GU L - OLF R	-0.0822816	-0.0860931
GU	GU L - ORB L	0.0366681	0.0328158		GU	GU L - ORB L	0.0264603	0.0385002		GU	GU L - ORB L	-0.202127	-0.265092
GU	GU L - ORB R	-0.000978548	-0.0206281		GU	GU L - ORB R	-0.0259973	-0.0207366		GU	GU L - ORB R	-0.193086	-0.226515
GU	GU L - OT L	0.114836	0.116601		GU	GU L - OT L	0.0538189	0.0537746		GU	GU L - OT L	-0.140088	-0.146832
GU	GU L - OT R	0.145976	0.153932		GU	GU L - OT R	-0.19005	-0.197334		GU	GU L - OT R	-0.0503707	-0.0477187
GU	GU L - PAG L	0.162696	0.173252		GU	GU L - PAG L	0.0548309	0.0528759		GU	GU L - PAG L	-0.0438807	-0.0414743
GU	GU L - PAG R	0.161783	0.17007		GU	GU L - PAG R	0.0771641	0.0802733		GU	GU L - PAG R	-0.0227227	-0.0167017
GU	GU L - PALc L	-0.057028	-0.0748562		GU	GU L - PALc L	-0.00133543	0.00529665		GU	GU L - PALc L	-0.125845	-0.147062
GU	GU L - PALc R	0.0979464	0.0985676		GU	GU L - PALc R	-0.124322	-0.125861		GU	GU L - PALc R	-0.108902	-0.110401
GU	GU L - PALd L	-0.118943	-0.128891		GU	GU L - PALd L	0.121338	0.135099		GU	GU L - PALd L	0.00458878	0.0137521
GU	GU L - PALd R	0.143333	0.147912		GU	GU L - PALd R	-0.139483	-0.142642		GU	GU L - PALd R	-0.114479	-0.116344
GU	GU L - PALm L	0.0731291	0.0688122		GU	GU L - PALm L	-0.0462293	-0.0432098		GU	GU L - PALm L	-0.188271	-0.194801
GU	GU L - PALm R	0.0784769	0.0769391		GU	GU L - PALm R	-0.149187	-0.149177		GU	GU L - PALm R	-0.0974233	-0.100246
GU	GU L - PALv L	0.00188402	-0.00366526		GU	GU L - PALv L	0.143604	0.157818		GU	GU L - PALv L	-0.181186	-0.198774
GU	GU L - PALv R	0.176845	0.18874		GU	GU L - PALv R	-0.20531	-0.218923		GU	GU L - PALv R	-0.0495738	-0.0428409
GU	GU L - PB L	0.106261	0.111305		GU	GU L - PB L	0.0499344	0.0472155		GU	GU L - PB L	0.00885358	0.0133778
GU	GU L - PB R	0.00174311	0.00376565		GU	GU L - PB R	0.161551	0.169415		GU	GU L - PB R	-0.0152469	-0.0156381
GU	GU L - PERI L	-0.0211494	-0.0210709		GU	GU L - PERI L	0.0625543	0.0622193		GU	GU L - PERI L	0.0862471	0.0883368
GU	GU L - PERI R	0.0304257	0.0300293		GU	GU L - PERI R	0.0231378	0.0237518		GU	GU L - PERI R	-0.141235	-0.143333
GU	GU L - PIR L	0.0027284	0.00342006		GU	GU L - PIR L	0.0558655	0.0680624		GU	GU L - PIR L	-0.0132877	-0.0152256
GU	GU L - PIR R	0.122798	0.138193		GU	GU L - PIR R	-0.145719	-0.162784		GU	GU L - PIR R	0.0549387	0.0676862
GU	GU L - PL L	0.0146944	0.000559829		GU	GU L - PL L	-0.113797	-0.117391		GU	GU L - PL L	-0.206898	-0.233242
GU	GU L - PL R	0.0223714	0.00869065		GU	GU L - PL R	-0.135819	-0.135071		GU	GU L - PL R	-0.216361	-0.236139
GU	GU L - PRNr L	0.133981	0.135933		GU	GU L - PRNr L	0.000987286	0.00181957		GU	GU L - PRNr L	-0.00549763	-0.00506075
GU	GU L - PRNr R	-0.0584405	-0.0615875		GU	GU L - PRNr R	0.0843609	0.0878386		GU	GU L - PRNr R	0.0740497	0.0731132
GU	GU L - PTLp L	0.0204764	0.0232292		GU	GU L - PTLp L	0.186154	0.189044		GU	GU L - PTLp L	-0.102226	-0.108508
GU	GU L - PTLp R	-0.213354	-0.225194		GU	GU L - PTLp R	0.151148	0.158622		GU	GU L - PTLp R	-0.144549	-0.155288
GU	GU L - RHP L	0.101492	0.102815		GU	GU L - RHP L	0.110098	0.111397		GU	GU L - RHP L	-0.0304452	-0.0310345
GU	GU L - RHP R	-0.179053	-0.183184		GU	GU L - RHP R	0.083	0.0865441		GU	GU L - RHP R	0.0495559	0.0463589
GU	GU L - RSP L	-0.0736374	-0.0757846		GU	GU L - RSP L	0.186952	0.19303		GU	GU L - RSP L	-0.101918	-0.107185
GU	GU L - RSP R	-0.164124	-0.172735		GU	GU L - RSP R	0.202049	0.211946		GU	GU L - RSP R	-0.185545	-0.19538
GU	GU L - SC L	0.0485327	0.046067		GU	GU L - SC L	0.159237	0.166446		GU	GU L - SC L	-0.0936818	-0.0980422
GU	GU L - SC R	-0.0105871	-0.011473		GU	GU L - SC R	0.119817	0.121337		GU	GU L - SC R	-0.0892842	-0.0899956
GU	GU L - SN L	0.0586271	0.0575002		GU	GU L - SN L	0.00299801	0.00429625		GU	GU L - SN L	-0.0609722	-0.0635814
GU	GU L - SN R	0.000224837	0.000982422		GU	GU L - SN R	-0.0101724	-0.0109325		GU	GU L - SN R	0.0153444	0.0157723
GU	GU L - STN L	-0.0681537	-0.0684511		GU	GU L - STN L	0.0765608	0.076839		GU	GU L - STN L	-0.0944523	-0.0955298
GU	GU L - STN R	0.0777721	0.079721		GU	GU L - STN R	-0.0698189	-0.0716895		GU	GU L - STN R	-0.0458578	-0.0467477
GU	GU L - TEa L	0.00400561	0.00225996		GU	GU L - TEa L	0.133106	0.136272		GU	GU L - TEa L	0.0346359	0.0355372
GU	GU L - TEa R	-0.124132	-0.132903		GU	GU L - TEa R	0.12884	0.138327		GU	GU L - TEa R	-0.146468	-0.154612
GU	GU L - TH L	0.0595882	0.0590367		GU	GU L - TH L	0.0324084	0.0336539		GU	GU L - TH L	-0.000244368	0.000273158
GU	GU L - TH R	0.0367451	0.0403383		GU	GU L - TH R	-0.0176772	-0.0215587		GU	GU L - TH R	-0.0896168	-0.0949804
GU	GU L - VIS L	0.00850102	0.00794722		GU	GU L - VIS L	0.212297	0.215748		GU	GU L - VIS L	-0.0970147	-0.0978895
GU	GU L - VIS R	-0.197346	-0.205927		GU	GU L - VIS R	0.148662	0.155514		GU	GU L - VIS R	-0.148693	-0.158036
GU	GU L - VISC L	-0.0316782	-0.129473		GU	GU L - VISC L	0.062803	0.182837		GU	GU L - VISC L	0.0454768	0.224503
GU	GU L - VISC R	0.0599095	0.0610548		GU	GU L - VISC R	0.0735697	0.0860191		GU	GU L - VISC R	-0.0879005	-0.0975987
GU	GU L - VTA L	0.0228646	0.0223429		GU	GU L - VTA L	0.0406187	0.0420787		GU	GU L - VTA L	-0.0594966	-0.0609553
GU	GU L - VTA R	0.0368941	0.0370905		GU	GU L - VTA R	0.0940912	0.0945258		GU	GU L - VTA R	0.0111886	0.011171
GU	GU L - ZI L	0.00676235	0.00672318		GU	GU L - ZI L	0.0347228	0.0348456		GU	GU L - ZI L	-0.113582	-0.114082
GU	GU L - ZI R	0.0535227	0.0543191		GU	GU L - ZI R	-0.0457858	-0.0465775		GU	GU L - ZI R	0.000783409	0.000161421
GU	GU R - ACA L	0.156094	0.199242		GU	GU R - ACA L	-0.165817	-0.210652		GU	GU R - ACA L	-0.059339	-0.0238577
GU	GU R - ACA R	0.188692	0.248652		GU	GU R - ACA R	-0.159264	-0.222625		GU	GU R - ACA R	-0.0932742	-0.0655576
GU	GU R - ACB L	-0.0577126	-0.0566795		GU	GU R - ACB L	-0.00602592	-0.0193814		GU	GU R - ACB L	-0.0217289	-0.0192685
GU	GU R - ACB R	0.252453	0.36511		GU	GU R - ACB R	-0.135941	-0.1976		GU	GU R - ACB R	-0.119318	-0.0974689
GU	GU R - AI L	-0.0637661	-0.0714545		GU	GU R - AI L	0.0271198	0.0288612		GU	GU R - AI L	0.0753337	0.0883408
GU	GU R - AI R	0.0360898	0.367887		GU	GU R - AI R	-0.00705557	-0.147216		GU	GU R - AI R	-0.0179237	-0.0733636
GU	GU R - AMY L	-0.215197	-0.222077		GU	GU R - AMY L	0.103041	0.104536		GU	GU R - AMY L	-0.0849728	-0.0870738
GU	GU R - AMY R	0.120583	0.121796		GU	GU R - AMY R	-0.130218	-0.132018		GU	GU R - AMY R	-0.135148	-0.136281
GU	GU R - AUD L	0.067742	0.0720091		GU	GU R - AUD L	0.141599	0.144541		GU	GU R - AUD L	-0.0451578	-0.0477509
GU	GU R - AUD R	-0.224227	-0.226083		GU	GU R - AUD R	0.0361787	0.0363957		GU	GU R - AUD R	-0.0654201	-0.0678581
GU	GU R - CB L	-0.0408004	-0.0416541		GU	GU R - CB L	-0.0156816	-0.0164181		GU	GU R - CB L	0.137447	0.138983
GU	GU R - CB R	0.0661236	0.0684552		GU	GU R - CB R	0.115032	0.115888		GU	GU R - CB R	0.107175	0.109689
GU	GU R - COA L	-0.0826332	-0.083207		GU	GU R - COA L	0.0266378	0.0269886		GU	GU R - COA L	0.0459455	0.046927
GU	GU R - COA R	0.0784195	0.0786448		GU	GU R - COA R	-0.0311623	-0.0312345		GU	GU R - COA R	-0.146148	-0.147325
GU	GU R - CP L	-0.156232	-0.166305		GU	GU R - CP L	-0.00146255	0.000596499		GU	GU R - CP L	0.077466	0.080179
GU	GU R - CP R	0.18484	0.481714		GU	GU R - CP R	-0.0398279	-0.0881224		GU	GU R - CP R	-0.133944	-0.29683
GU	GU R - CSm L	-0.0296667	-0.0317751		GU	GU R - CSm L	-0.0133519	-0.0128243		GU	GU R - CSm L	0.0251617	0.0269861
GU	GU R - CSm R	0.0254037	0.0249219		GU	GU R - CSm R	-0.0230427	-0.0233147		GU	GU R - CSm R	0.0124025	0.0130088
GU	GU R - ECT L	0.0949043	0.0968776		GU	GU R - ECT L	0.0748346	0.0751319		GU	GU R - ECT L	0.00696444	0.0066794
GU	GU R - ECT R	-0.026756	-0.0269503		GU	GU R - ECT R	0.060708	0.0609363		GU	GU R - ECT R	-0.0470555	-0.0482264
GU	GU R - ENT L	0.0906948	0.0929192		GU	GU R - ENT L	-0.06373	-0.0663574		GU	GU R - ENT L	-0.0413468	-0.0396822
GU	GU R - ENT R	0.0608212	0.061377		GU	GU R - ENT R	0.14013	0.141218		GU	GU R - ENT R	-0.0546918	-0.054775
GU	GU R - FS L	-0.168526	-0.179958		GU	GU R - FS L	0.185378	0.199711		GU	GU R - FS L	0.00456454	0.00425552
GU	GU R - FS R	0.246902	0.284009		GU	GU R - FS R	-0.14652	-0.141843		GU	GU R - FS R	-0.220623	-0.251239
GU	GU R - HIP L	0.0957032	0.0978841		GU	GU R - HIP L	0.0448457	0.0466519		GU	GU R - HIP L	0.0760125	0.0782456
GU	GU R - HIP R	0.071927	0.0782905		GU	GU R - HIP R	0.040946	0.0406768		GU	GU R - HIP R	-0.0931871	-0.0996604
GU	GU R - HT L	-0.166344	-0.172153		GU	GU R - HT L	0.0205998	0.0171381		GU	GU R - HT L	-0.00508944	-0.00860116
GU	GU R - HT R	-0.00392446	-0.00709795		GU	GU R - HT R	-0.0204584	-0.0220234		GU	GU R - HT R	-0.148714	-0.155051
GU	GU R - IC L	-0.131169	-0.134664		GU	GU R - IC L	0.105572	0.105234		GU	GU R - IC L	0.0320285	0.0331827
GU	GU R - IC R	0.0559906	0.057864		GU	GU R - IC R	0.0659371	0.0672476		GU	GU R - IC R	0.00758903	0.00866823
GU	GU R - ILA L	0.205675	0.298913		GU	GU R - ILA L	-0.0847937	-0.147925		GU	GU R - ILA L	-0.113163	-0.0767158
GU	GU R - ILA R	0.228198	0.430331		GU	GU R - ILA R	-0.0969481	-0.201781		GU	GU R - ILA R	-0.138964	-0.17275
GU	GU R - LSX L	0.0894002	0.120921		GU	GU R - LSX L	-0.122977	-0.160824		GU	GU R - LSX L	-0.113331	-0.0895642
GU	GU R - LSX R	0.283607	0.395467		GU	GU R - LSX R	-0.167791	-0.24383		GU	GU R - LSX R	-0.161503	-0.140857
GU	GU R - MB R	0.0816414	0.0881825		GU	GU R - MB R	0.0443832	0.0453128		GU	GU R - MB R	-0.0218561	-0.0226598
GU	GU R - MOB R	-0.0125421	-0.0186708		GU	GU R - MOB R	0.0430375	0.0512866		GU	GU R - MOB R	-0.0464126	-0.055584
GU	GU R - MRN L	-0.00110008	-0.00355367		GU	GU R - MRN L	-0.0167936	-0.0170807		GU	GU R - MRN L	0.128003	0.132295
GU	GU R - MRN R	0.0677661	0.0695407		GU	GU R - MRN R	0.0737321	0.0800168		GU	GU R - MRN R	0.0360094	0.0425321
GU	GU R - MY L	-0.122741	-0.123333		GU	GU R - MY L	0.0104404	0.0104259		GU	GU R - MY L	-0.0433955	-0.0436419
GU	GU R - MY R	-0.136374	-0.137288		GU	GU R - MY R	0.0115789	0.0113225		GU	GU R - MY R	0.0138626	0.0141335
GU	GU R - NBM L	-0.122336	-0.123686		GU	GU R - NBM L	0.00221797	0.00200225		GU	GU R - NBM L	0.00435617	0.00417818
GU	GU R - NBM R	0.148535	0.152832		GU	GU R - NBM R	-0.156258	-0.163874		GU	GU R - NBM R	-0.205462	-0.223589
GU	GU R - OLF L	-0.0757709	-0.0808116		GU	GU R - OLF L	0.00219665	0.00321572		GU	GU R - OLF L	-0.0123849	-0.0169497
GU	GU R - OLF R	0.168949	0.181221		GU	GU R - OLF R	-0.0881011	-0.0932894		GU	GU R - OLF R	-0.109851	-0.114143
GU	GU R - ORB L	0.0623292	0.124341		GU	GU R - ORB L	-0.0885309	-0.157343		GU	GU R - ORB L	0.0249147	0.0845989
GU	GU R - ORB R	0.156171	0.336618		GU	GU R - ORB R	-0.0660876	-0.186782		GU	GU R - ORB R	-0.0669543	-0.051919
GU	GU R - OT L	-0.0518398	-0.0563203		GU	GU R - OT L	0.0318124	0.0359158		GU	GU R - OT L	-0.110943	-0.118617
GU	GU R - OT R	0.109863	0.0867079		GU	GU R - OT R	-0.140787	-0.119349		GU	GU R - OT R	-0.139126	-0.165052
GU	GU R - PAG L	-0.0133987	-0.018018		GU	GU R - PAG L	0.0740016	0.0828873		GU	GU R - PAG L	0.10384	0.114252
GU	GU R - PAG R	0.00462381	0.00293634		GU	GU R - PAG R	0.0487696	0.0581728		GU	GU R - PAG R	0.123069	0.135376
GU	GU R - PALc L	-0.282954	-0.300323		GU	GU R - PALc L	-0.0339018	-0.0450302		GU	GU R - PALc L	0.0704288	0.0758577
GU	GU R - PALc R	0.190384	0.203931		GU	GU R - PALc R	-0.0875856	-0.0836915		GU	GU R - PALc R	-0.285057	-0.333385
GU	GU R - PALd L	-0.210193	-0.214628		GU	GU R - PALd L	-0.0143676	-0.0160584		GU	GU R - PALd L	0.13814	0.141683
GU	GU R - PALd R	0.191025	0.206079		GU	GU R - PALd R	-0.00464977	0.000734466		GU	GU R - PALd R	-0.261644	-0.28429
GU	GU R - PALm L	-0.075623	-0.0929419		GU	GU R - PALm L	0.00738347	0.0188299		GU	GU R - PALm L	-0.110702	-0.128729
GU	GU R - PALm R	0.0724123	0.0424899		GU	GU R - PALm R	-0.0936364	-0.0637391		GU	GU R - PALm R	-0.181419	-0.221908
GU	GU R - PALv L	-0.166433	-0.176833		GU	GU R - PALv L	0.105664	0.108318		GU	GU R - PALv L	-0.0895821	-0.0988531
GU	GU R - PALv R	0.206173	0.212532		GU	GU R - PALv R	-0.163096	-0.160722		GU	GU R - PALv R	-0.20689	-0.225029
GU	GU R - PB L	0.0349463	0.0341963		GU	GU R - PB L	-0.0483518	-0.0492861		GU	GU R - PB L	0.117753	0.120269
GU	GU R - PB R	0.0993618	0.111617		GU	GU R - PB R	0.172936	0.185713		GU	GU R - PB R	0.0431465	0.0544464
GU	GU R - PERI L	0.0506412	0.0465935		GU	GU R - PERI L	0.121311	0.126195		GU	GU R - PERI L	-0.0157513	-0.0196002
GU	GU R - PERI R	-0.0977374	-0.0997376		GU	GU R - PERI R	0.0821276	0.0835731		GU	GU R - PERI R	-0.0801128	-0.0812881
GU	GU R - PIR L	-0.153579	-0.170888		GU	GU R - PIR L	0.0576669	0.0682997		GU	GU R - PIR L	0.0580287	0.0565532
GU	GU R - PIR R	0.265571	0.396821		GU	GU R - PIR R	-0.130806	-0.191658		GU	GU R - PIR R	-0.0893956	-0.0899273
GU	GU R - PL L	0.149657	0.235088		GU	GU R - PL L	-0.165459	-0.258115		GU	GU R - PL L	-0.0516351	0.0146283
GU	GU R - PL R	0.169235	0.291606		GU	GU R - PL R	-0.128867	-0.243571		GU	GU R - PL R	-0.0480711	0.0163021
GU	GU R - PRNr L	-0.101975	-0.103979		GU	GU R - PRNr L	0.0358731	0.0376395		GU	GU R - PRNr L	0.0604301	0.0609297
GU	GU R - PRNr R	0.0232905	0.023253		GU	GU R - PRNr R	0.0580958	0.0588168		GU	GU R - PRNr R	-0.0337616	-0.0338659
GU	GU R - PTLp L	-0.0193988	-0.0238104		GU	GU R - PTLp L	0.090426	0.0988454		GU	GU R - PTLp L	-0.126822	-0.136788
GU	GU R - PTLp R	-0.120816	-0.124056		GU	GU R - PTLp R	0.118796	0.121618		GU	GU R - PTLp R	-0.103299	-0.105914
GU	GU R - RHP L	0.0971436	0.0986628		GU	GU R - RHP L	0.100165	0.101421		GU	GU R - RHP L	0.0570885	0.0576695
GU	GU R - RHP R	0.101395	0.106624		GU	GU R - RHP R	0.0966267	0.0983723		GU	GU R - RHP R	0.0204249	0.0217956
GU	GU R - RSP L	-0.0208973	-0.0272388		GU	GU R - RSP L	0.138071	0.145825		GU	GU R - RSP L	-0.0473275	-0.0540175
GU	GU R - RSP R	0.00397522	-0.00271368		GU	GU R - RSP R	0.112393	0.119894		GU	GU R - RSP R	-0.113805	-0.121171
GU	GU R - SC L	-0.0555095	-0.0556511		GU	GU R - SC L	0.190009	0.194873		GU	GU R - SC L	0.0645484	0.0694215
GU	GU R - SC R	0.0298933	0.031875		GU	GU R - SC R	0.119934	0.124765		GU	GU R - SC R	0.0196345	0.0220446
GU	GU R - SN L	-0.0797113	-0.0827264		GU	GU R - SN L	-0.0838458	-0.085795		GU	GU R - SN L	-0.0145726	-0.0157518
GU	GU R - SN R	0.0961099	0.0969251		GU	GU R - SN R	0.0454335	0.0453549		GU	GU R - SN R	-0.0189287	-0.0190306
GU	GU R - STN L	-0.22026	-0.227301		GU	GU R - STN L	0.0565142	0.0559796		GU	GU R - STN L	-0.00432409	-0.00614322
GU	GU R - STN R	0.0541743	0.053832		GU	GU R - STN R	-0.120304	-0.122494		GU	GU R - STN R	-0.109617	-0.111285
GU	GU R - TEa L	0.0750757	0.0770187		GU	GU R - TEa L	0.0795416	0.0805991		GU	GU R - TEa L	0.0230267	0.0214851
GU	GU R - TEa R	-0.0361862	-0.036869		GU	GU R - TEa R	0.0426984	0.0434285		GU	GU R - TEa R	-0.0263826	-0.0275781
GU	GU R - TH L	-0.0702136	-0.0730161		GU	GU R - TH L	-0.000910809	0.000622286		GU	GU R - TH L	0.0950575	0.0950752
GU	GU R - TH R	0.0554418	0.0602115		GU	GU R - TH R	-0.0752939	-0.0804545		GU	GU R - TH R	-0.144411	-0.147201
GU	GU R - VIS L	-0.0440662	-0.0460621		GU	GU R - VIS L	0.167758	0.171981		GU	GU R - VIS L	-0.00108176	-0.00218461
GU	GU R - VIS R	0.0293265	0.0303482		GU	GU R - VIS R	0.0499328	0.050674		GU	GU R - VIS R	-0.103257	-0.10456
GU	GU R - VISC L	-0.0824717	-0.0963379		GU	GU R - VISC L	0.113056	0.136699		GU	GU R - VISC L	-0.000693213	-0.00804716
GU	GU R - VISC R	-0.0272672	-0.0269701		GU	GU R - VISC R	0.0603007	0.099624		GU	GU R - VISC R	-0.07389	-0.130595
GU	GU R - VTA L	-0.114485	-0.117085		GU	GU R - VTA L	-0.0481708	-0.0495804		GU	GU R - VTA L	0.0226958	0.0215751
GU	GU R - VTA R	-0.0242504	-0.0247873		GU	GU R - VTA R	-0.00120389	-0.000704699		GU	GU R - VTA R	-0.0412404	-0.041841
GU	GU R - ZI L	-0.172476	-0.175977		GU	GU R - ZI L	-0.0152086	-0.0173619		GU	GU R - ZI L	0.0374463	0.0368767
GU	GU R - ZI R	0.0192673	0.0177047		GU	GU R - ZI R	-0.105346	-0.107742		GU	GU R - ZI R	-0.128397	-0.130648
HIP	HIP L - ACB L	0.102636	0.102443		HIP	HIP L - ACB L	-0.0953416	-0.101076		HIP	HIP L - ACB L	-0.091502	-0.0909021
HIP	HIP L - ACB R	0.0863918	0.0891963		HIP	HIP L - ACB R	-0.0105581	-0.0090967		HIP	HIP L - ACB R	0.0297926	0.0314973
HIP	HIP L - AMY L	0.0429323	0.0437783		HIP	HIP L - AMY L	0.0647339	0.0650713		HIP	HIP L - AMY L	-0.00437086	-0.00435898
HIP	HIP L - AMY R	0.000706709	0.00179675		HIP	HIP L - AMY R	0.186852	0.192819		HIP	HIP L - AMY R	-0.00129123	0.00456558
HIP	HIP L - CB L	-0.254852	-0.261899		HIP	HIP L - CB L	0.00694069	0.00512241		HIP	HIP L - CB L	-0.0387637	-0.0375011
HIP	HIP L - CB R	-0.0113142	-0.00706223		HIP	HIP L - CB R	-0.113571	-0.125235		HIP	HIP L - CB R	0.0820769	0.0897809
HIP	HIP L - COA L	-0.192919	-0.200944		HIP	HIP L - COA L	0.180051	0.188056		HIP	HIP L - COA L	0.0196197	0.0184752
HIP	HIP L - COA R	0.0349133	0.0367644		HIP	HIP L - COA R	0.101723	0.103103		HIP	HIP L - COA R	0.00496732	0.0073029
HIP	HIP L - CP L	0.156887	0.158965		HIP	HIP L - CP L	0.0329816	0.033221		HIP	HIP L - CP L	0.000673978	0.000543664
HIP	HIP L - CP R	0.155981	0.162418		HIP	HIP L - CP R	-0.0128079	-0.00787726		HIP	HIP L - CP R	0.0338027	0.0390013
HIP	HIP L - CSm L	0.0948977	0.107483		HIP	HIP L - CSm L	-0.246025	-0.261562		HIP	HIP L - CSm L	-0.0506067	-0.06303
HIP	HIP L - CSm R	0.159283	0.17292		HIP	HIP L - CSm R	-0.219269	-0.237508		HIP	HIP L - CSm R	-0.0468481	-0.059257
HIP	HIP L - ENT L	-0.0249923	-0.0137167		HIP	HIP L - ENT L	-0.00664106	-0.0181862		HIP	HIP L - ENT L	0.140788	0.171971
HIP	HIP L - ENT R	0.205513	0.215687		HIP	HIP L - ENT R	0.0350861	0.0293311		HIP	HIP L - ENT R	0.0551803	0.0616363
HIP	HIP L - FS L	-0.225221	-0.229562		HIP	HIP L - FS L	-0.00833608	-0.0104723		HIP	HIP L - FS L	0.113525	0.116112
HIP	HIP L - FS R	0.227964	0.234329		HIP	HIP L - FS R	0.101622	0.106773		HIP	HIP L - FS R	-0.0118158	-0.00760681
HIP	HIP L - HIP R	0.245512	0.26171		HIP	HIP L - HIP R	-0.0354025	-0.0457825		HIP	HIP L - HIP R	0.0209584	0.0312963
HIP	HIP L - HT L	0.0733439	0.0810364		HIP	HIP L - HT L	0.110781	0.117932		HIP	HIP L - HT L	0.0134551	0.0201573
HIP	HIP L - HT R	0.0228426	0.0270547		HIP	HIP L - HT R	0.172645	0.189568		HIP	HIP L - HT R	-0.00712558	0.00356023
HIP	HIP L - IC L	-0.081858	-0.0871081		HIP	HIP L - IC L	-0.00719536	-0.003769		HIP	HIP L - IC L	-0.0911368	-0.0960497
HIP	HIP L - IC R	0.130151	0.154439		HIP	HIP L - IC R	-0.215327	-0.2434		HIP	HIP L - IC R	-0.0461871	-0.0584265
HIP	HIP L - LSX L	0.0717034	0.075959		HIP	HIP L - LSX L	-0.0972336	-0.111433		HIP	HIP L - LSX L	-0.0200374	-0.0206482
HIP	HIP L - LSX R	0.123568	0.131415		HIP	HIP L - LSX R	-0.11065	-0.115432		HIP	HIP L - LSX R	0.00561529	0.00802277
HIP	HIP L - MB R	0.204384	0.232597		HIP	HIP L - MB R	-0.0991046	-0.116785		HIP	HIP L - MB R	-0.0882166	-0.103425
HIP	HIP L - MRN L	0.092813	0.092684		HIP	HIP L - MRN L	-0.206686	-0.221035		HIP	HIP L - MRN L	-0.120333	-0.126525
HIP	HIP L - MRN R	0.152252	0.170751		HIP	HIP L - MRN R	-0.148854	-0.165454		HIP	HIP L - MRN R	-0.0777369	-0.0873057
HIP	HIP L - MY L	0.0723849	0.0731363		HIP	HIP L - MY L	-0.11649	-0.118471		HIP	HIP L - MY L	-0.00271271	-0.00287772
HIP	HIP L - MY R	0.0683832	0.0685594		HIP	HIP L - MY R	-0.127432	-0.129993		HIP	HIP L - MY R	-0.000419904	0.000434818
HIP	HIP L - NBM L	-0.085082	-0.0887345		HIP	HIP L - NBM L	0.0594731	0.0618313		HIP	HIP L - NBM L	0.10325	0.106074
HIP	HIP L - NBM R	0.0498369	0.0522598		HIP	HIP L - NBM R	0.127691	0.130474		HIP	HIP L - NBM R	-0.0241827	-0.0220835
HIP	HIP L - OLF L	0.0299797	0.0294677		HIP	HIP L - OLF L	0.0819195	0.08443		HIP	HIP L - OLF L	0.0496734	0.0498622
HIP	HIP L - OLF R	0.0940827	0.100821		HIP	HIP L - OLF R	0.113881	0.121203		HIP	HIP L - OLF R	0.0878563	0.0950326
HIP	HIP L - OT L	-0.0911608	-0.0922964		HIP	HIP L - OT L	-0.00475697	-0.00604551		HIP	HIP L - OT L	-0.0232645	-0.0224825
HIP	HIP L - OT R	0.0787041	0.0804086		HIP	HIP L - OT R	0.0878532	0.0894614		HIP	HIP L - OT R	0.0194726	0.020688
HIP	HIP L - PAG L	-0.0121984	-0.0133249		HIP	HIP L - PAG L	-0.13771	-0.142801		HIP	HIP L - PAG L	-0.201625	-0.212127
HIP	HIP L - PAG R	0.00422818	0.012199		HIP	HIP L - PAG R	-0.165609	-0.175721		HIP	HIP L - PAG R	-0.133165	-0.142489
HIP	HIP L - PALc L	0.00459726	0.00996867		HIP	HIP L - PALc L	-0.068286	-0.0763641		HIP	HIP L - PALc L	0.046351	0.0402038
HIP	HIP L - PALc R	0.157222	0.163593		HIP	HIP L - PALc R	-0.053434	-0.0531594		HIP	HIP L - PALc R	-0.0396333	-0.0388718
HIP	HIP L - PALd L	0.217079	0.223332		HIP	HIP L - PALd L	-0.0414588	-0.0447487		HIP	HIP L - PALd L	0.00928711	0.0110438
HIP	HIP L - PALd R	-0.0721712	-0.0725132		HIP	HIP L - PALd R	0.0199534	0.0196215		HIP	HIP L - PALd R	0.0308495	0.0327314
HIP	HIP L - PALm L	0.0278709	0.0264654		HIP	HIP L - PALm L	-0.0426699	-0.0474063		HIP	HIP L - PALm L	-0.0476084	-0.0455965
HIP	HIP L - PALm R	0.123582	0.127832		HIP	HIP L - PALm R	0.00746739	0.00843894		HIP	HIP L - PALm R	-0.032183	-0.029807
HIP	HIP L - PALv L	-0.0486661	-0.0528096		HIP	HIP L - PALv L	-0.0856339	-0.0891376		HIP	HIP L - PALv L	0.0344285	0.0381167
HIP	HIP L - PALv R	0.102804	0.109795		HIP	HIP L - PALv R	0.141368	0.148389		HIP	HIP L - PALv R	-0.00995986	-0.00406087
HIP	HIP L - PB L	-0.12154	-0.129764		HIP	HIP L - PB L	-0.154209	-0.154727		HIP	HIP L - PB L	-0.108721	-0.121061
HIP	HIP L - PB R	0.0544367	0.0590649		HIP	HIP L - PB R	-0.21378	-0.228929		HIP	HIP L - PB R	-0.0706514	-0.0688934
HIP	HIP L - PRNr L	-0.135794	-0.138101		HIP	HIP L - PRNr L	-0.166135	-0.168951		HIP	HIP L - PRNr L	0.0179835	0.0185103
HIP	HIP L - PRNr R	0.221975	0.235221		HIP	HIP L - PRNr R	-0.111613	-0.117176		HIP	HIP L - PRNr R	-0.0424927	-0.0504555
HIP	HIP L - RHP L	0.0253647	0.0677641		HIP	HIP L - RHP L	0.000776519	-0.0195324		HIP	HIP L - RHP L	-0.0156237	-0.0474731
HIP	HIP L - RHP R	0.278231	0.296601		HIP	HIP L - RHP R	-0.151544	-0.168576		HIP	HIP L - RHP R	-0.107435	-0.102502
HIP	HIP L - SC L	0.0191162	0.0200391		HIP	HIP L - SC L	-0.00426369	-0.00381995		HIP	HIP L - SC L	-0.0803691	-0.0902128
HIP	HIP L - SC R	0.182833	0.190646		HIP	HIP L - SC R	-0.171828	-0.179217		HIP	HIP L - SC R	-0.109845	-0.115747
HIP	HIP L - SN L	0.210477	0.215652		HIP	HIP L - SN L	-0.174505	-0.179657		HIP	HIP L - SN L	-0.0878132	-0.089583
HIP	HIP L - SN R	-0.00739984	-0.0165636		HIP	HIP L - SN R	0.100395	0.106432		HIP	HIP L - SN R	0.084907	0.0979082
HIP	HIP L - STN L	-0.029833	-0.0276663		HIP	HIP L - STN L	0.116859	0.119117		HIP	HIP L - STN L	-0.0319178	-0.0325305
HIP	HIP L - STN R	0.0987925	0.107253		HIP	HIP L - STN R	0.241541	0.266017		HIP	HIP L - STN R	-0.0312639	-0.0214238
HIP	HIP L - TH L	-0.00732163	-0.0110397		HIP	HIP L - TH L	-0.11261	-0.11887		HIP	HIP L - TH L	-0.0633348	-0.0619686
HIP	HIP L - TH R	0.0504717	0.0582768		HIP	HIP L - TH R	-0.0975044	-0.110734		HIP	HIP L - TH R	-0.0418278	-0.0496387
HIP	HIP L - VTA L	0.204055	0.219514		HIP	HIP L - VTA L	-0.0524604	-0.0659342		HIP	HIP L - VTA L	-0.0177604	-0.0305261
HIP	HIP L - VTA R	0.116925	0.123216		HIP	HIP L - VTA R	0.0279443	0.0304541		HIP	HIP L - VTA R	0.0021142	0.00304213
HIP	HIP L - ZI L	-0.0384288	-0.031941		HIP	HIP L - ZI L	0.0907471	0.0883324		HIP	HIP L - ZI L	-0.0219028	-0.0275285
HIP	HIP L - ZI R	0.0915126	0.0981795		HIP	HIP L - ZI R	0.130803	0.140214		HIP	HIP L - ZI R	-0.0758388	-0.074765
HIP	HIP R - ACB L	0.0327683	0.0334953		HIP	HIP R - ACB L	-0.0211371	-0.0217861		HIP	HIP R - ACB L	-0.0663621	-0.0673158
HIP	HIP R - ACB R	-1.57285e-05	-0.00178159		HIP	HIP R - ACB R	0.0542022	0.0552369		HIP	HIP R - ACB R	-0.0565798	-0.0573679
HIP	HIP R - AMY L	-0.0565419	-0.0579162		HIP	HIP R - AMY L	0.0465024	0.0492248		HIP	HIP R - AMY L	0.0164308	0.0168746
HIP	HIP R - AMY R	-0.0521781	-0.0520153		HIP	HIP R - AMY R	0.0241231	0.0257035		HIP	HIP R - AMY R	0.0641418	0.0636559
HIP	HIP R - CB L	-0.0973061	-0.117378		HIP	HIP R - CB L	0.077159	0.0872032		HIP	HIP R - CB L	0.029675	0.04448
HIP	HIP R - CB R	-0.161178	-0.167533		HIP	HIP R - CB R	0.0101489	0.0105896		HIP	HIP R - CB R	-0.0422775	-0.0431901
HIP	HIP R - COA L	0.0309632	0.0312973		HIP	HIP R - COA L	-0.0594886	-0.0604028		HIP	HIP R - COA L	-0.00655257	-0.00820991
HIP	HIP R - COA R	0.0902846	0.0926096		HIP	HIP R - COA R	0.02723	0.0272424		HIP	HIP R - COA R	0.127327	0.132425
HIP	HIP R - CP L	-0.144522	-0.146426		HIP	HIP R - CP L	0.115215	0.117656		HIP	HIP R - CP L	-0.12387	-0.126476
HIP	HIP R - CP R	-0.0144547	-0.015255		HIP	HIP R - CP R	0.0553252	0.0571611		HIP	HIP R - CP R	-0.00929714	-0.00847687
HIP	HIP R - CSm L	0.101853	0.103134		HIP	HIP R - CSm L	-0.0631999	-0.0647475		HIP	HIP R - CSm L	0.0504167	0.0510914
HIP	HIP R - CSm R	0.0828771	0.0857855		HIP	HIP R - CSm R	-0.0390672	-0.0415518		HIP	HIP R - CSm R	-0.00412474	-0.00533375
HIP	HIP R - ENT L	0.0840579	0.0860132		HIP	HIP R - ENT L	-0.0851669	-0.0872742		HIP	HIP R - ENT L	0.0163277	0.0178106
HIP	HIP R - ENT R	0.0367221	0.0530355		HIP	HIP R - ENT R	-0.0536715	-0.0733216		HIP	HIP R - ENT R	-0.100116	-0.158297
HIP	HIP R - FS L	-0.0686075	-0.0703027		HIP	HIP R - FS L	-0.0242336	-0.0245724		HIP	HIP R - FS L	-0.115057	-0.115766
HIP	HIP R - FS R	-0.0459075	-0.0455508		HIP	HIP R - FS R	0.0307392	0.0311647		HIP	HIP R - FS R	-0.0382221	-0.03915
HIP	HIP R - HT L	-0.0996472	-0.101162		HIP	HIP R - HT L	-0.125256	-0.127233		HIP	HIP R - HT L	-0.0535772	-0.0533666
HIP	HIP R - HT R	-0.0372338	-0.0384361		HIP	HIP R - HT R	-0.0233049	-0.0239985		HIP	HIP R - HT R	-0.0379257	-0.0379954
HIP	HIP R - IC L	0.0342413	0.0390678		HIP	HIP R - IC L	-0.00890071	-0.0142869		HIP	HIP R - IC L	0.082244	0.0997909
HIP	HIP R - IC R	-0.146021	-0.151148		HIP	HIP R - IC R	-0.0808429	-0.0860655		HIP	HIP R - IC R	0.00307181	-0.000162919
HIP	HIP R - LSX L	-0.0148215	-0.0196482		HIP	HIP R - LSX L	-0.0387024	-0.0431221		HIP	HIP R - LSX L	-0.0522252	-0.0488222
HIP	HIP R - LSX R	-0.0662998	-0.0739482		HIP	HIP R - LSX R	-0.0965232	-0.103602		HIP	HIP R - LSX R	0.0144724	0.0183373
HIP	HIP R - MB R	0.166454	0.2457		HIP	HIP R - MB R	-0.0611457	-0.0874774		HIP	HIP R - MB R	-0.0842617	-0.121376
HIP	HIP R - MRN L	0.207631	0.211824		HIP	HIP R - MRN L	-0.225522	-0.232731		HIP	HIP R - MRN L	0.0885336	0.0937787
HIP	HIP R - MRN R	0.135436	0.160714		HIP	HIP R - MRN R	-0.100837	-0.120233		HIP	HIP R - MRN R	-0.0696079	-0.0807711
HIP	HIP R - MY L	0.134479	0.138348		HIP	HIP R - MY L	-0.07997	-0.0829329		HIP	HIP R - MY L	0.0621311	0.0613916
HIP	HIP R - MY R	0.173787	0.176991		HIP	HIP R - MY R	-0.0737463	-0.0745632		HIP	HIP R - MY R	0.0168351	0.0168102
HIP	HIP R - NBM L	-0.161594	-0.163606		HIP	HIP R - NBM L	-0.0275364	-0.0305739		HIP	HIP R - NBM L	-0.0952359	-0.0964635
HIP	HIP R - NBM R	-0.0089734	-0.00950179		HIP	HIP R - NBM R	0.0920653	0.0967235		HIP	HIP R - NBM R	-0.0165842	-0.0162817
HIP	HIP R - OLF L	0.015249	0.0141844		HIP	HIP R - OLF L	-0.118199	-0.120399		HIP	HIP R - OLF L	0.0765587	0.078991
HIP	HIP R - OLF R	0.0640671	0.0655699		HIP	HIP R - OLF R	-0.0147115	-0.0134014		HIP	HIP R - OLF R	0.0480202	0.0480407
HIP	HIP R - OT L	0.0537915	0.0540468		HIP	HIP R - OT L	-0.0168173	-0.0169372		HIP	HIP R - OT L	-0.0557864	-0.0560448
HIP	HIP R - OT R	0.0613491	0.063838		HIP	HIP R - OT R	0.112904	0.115968		HIP	HIP R - OT R	-0.135938	-0.139139
HIP	HIP R - PAG L	0.123957	0.127094		HIP	HIP R - PAG L	-0.176616	-0.183055		HIP	HIP R - PAG L	0.0982873	0.104083
HIP	HIP R - PAG R	0.0862383	0.0906418		HIP	HIP R - PAG R	-0.168314	-0.173066		HIP	HIP R - PAG R	0.00393367	0.00184544
HIP	HIP R - PALc L	-0.104959	-0.109379		HIP	HIP R - PALc L	-0.0284987	-0.0319594		HIP	HIP R - PALc L	-0.174755	-0.17424
HIP	HIP R - PALc R	-0.110528	-0.119636		HIP	HIP R - PALc R	0.0170771	0.0168959		HIP	HIP R - PALc R	-0.000167451	0.00175761
HIP	HIP R - PALd L	-0.191536	-0.195149		HIP	HIP R - PALd L	0.112795	0.116114		HIP	HIP R - PALd L	-0.130887	-0.133753
HIP	HIP R - PALd R	-0.0667327	-0.0682376		HIP	HIP R - PALd R	0.042819	0.0421558		HIP	HIP R - PALd R	0.0650886	0.066735
HIP	HIP R - PALm L	-0.0247377	-0.0261545		HIP	HIP R - PALm L	-0.00302889	-0.00384123		HIP	HIP R - PALm L	-0.0894878	-0.0895177
HIP	HIP R - PALm R	-0.0498095	-0.0520904		HIP	HIP R - PALm R	0.0608494	0.0613236		HIP	HIP R - PALm R	-0.0884942	-0.0887306
HIP	HIP R - PALv L	-0.129954	-0.132917		HIP	HIP R - PALv L	-0.00386295	-0.00335745		HIP	HIP R - PALv L	-0.0564437	-0.0570818
HIP	HIP R - PALv R	-0.0602677	-0.0602946		HIP	HIP R - PALv R	0.0794324	0.0817519		HIP	HIP R - PALv R	-0.0538592	-0.056112
HIP	HIP R - PB L	-0.00139091	-0.00967568		HIP	HIP R - PB L	-0.0514176	-0.0658135		HIP	HIP R - PB L	0.0402352	0.0524263
HIP	HIP R - PB R	-0.0720007	-0.081222		HIP	HIP R - PB R	-0.0340493	-0.0286234		HIP	HIP R - PB R	-0.102606	-0.122191
HIP	HIP R - PRNr L	0.128023	0.130203		HIP	HIP R - PRNr L	-0.134078	-0.141957		HIP	HIP R - PRNr L	0.0938493	0.105481
HIP	HIP R - PRNr R	0.134276	0.139656		HIP	HIP R - PRNr R	0.0275662	0.0312527		HIP	HIP R - PRNr R	-0.0836668	-0.0893486
HIP	HIP R - RHP L	0.178253	0.192836		HIP	HIP R - RHP L	-0.139712	-0.152494		HIP	HIP R - RHP L	0.0284244	0.0362222
HIP	HIP R - RHP R	-0.0371442	-0.0965444		HIP	HIP R - RHP R	0.00289904	0.0435163		HIP	HIP R - RHP R	-0.137586	-0.248312
HIP	HIP R - SC L	0.149949	0.157653		HIP	HIP R - SC L	-0.172497	-0.180229		HIP	HIP R - SC L	0.0303556	0.034325
HIP	HIP R - SC R	0.0277463	0.0355199		HIP	HIP R - SC R	-0.0989808	-0.105146		HIP	HIP R - SC R	-0.0243067	-0.0326387
HIP	HIP R - SN L	0.150897	0.162385		HIP	HIP R - SN L	-0.148922	-0.14576		HIP	HIP R - SN L	0.14207	0.153073
HIP	HIP R - SN R	0.0839194	0.0982711		HIP	HIP R - SN R	0.0361412	0.0510538		HIP	HIP R - SN R	-0.0510619	-0.0631857
HIP	HIP R - STN L	0.0639977	0.0691342		HIP	HIP R - STN L	-0.166295	-0.173681		HIP	HIP R - STN L	-0.0991492	-0.109991
HIP	HIP R - STN R	-0.099686	-0.100804		HIP	HIP R - STN R	-0.0259499	-0.0255619		HIP	HIP R - STN R	-0.0176433	-0.0178507
HIP	HIP R - TH L	0.177048	0.185525		HIP	HIP R - TH L	-0.156925	-0.16396		HIP	HIP R - TH L	-0.105542	-0.111197
HIP	HIP R - TH R	0.0911901	0.0940905		HIP	HIP R - TH R	-0.137749	-0.14281		HIP	HIP R - TH R	0.0839371	0.0829068
HIP	HIP R - VTA L	0.082604	0.0841741		HIP	HIP R - VTA L	-0.0896245	-0.0894883		HIP	HIP R - VTA L	0.0213035	0.0217049
HIP	HIP R - VTA R	0.198536	0.201386		HIP	HIP R - VTA R	-0.0681148	-0.0672644		HIP	HIP R - VTA R	-0.0257403	-0.0268775
HIP	HIP R - ZI L	0.103174	0.108109		HIP	HIP R - ZI L	-0.131578	-0.137065		HIP	HIP R - ZI L	-0.130073	-0.138805
HIP	HIP R - ZI R	-0.00932882	-0.00945326		HIP	HIP R - ZI R	-0.0218141	-0.0219948		HIP	HIP R - ZI R	0.0513469	0.0515814
HT	HT L - CB L	0.0153656	0.0174439		HT	HT L - CB L	0.0459874	0.0490237		HT	HT L - CB L	-0.00145901	-0.00270626
HT	HT L - CB R	-0.194713	-0.200019		HT	HT L - CB R	0.0215074	0.0221301		HT	HT L - CB R	0.0210936	0.0198109
HT	HT L - COA L	0.132468	0.147947		HT	HT L - COA L	-0.111024	-0.123599		HT	HT L - COA L	-0.123505	-0.138542
HT	HT L - COA R	-0.0748885	-0.0749847		HT	HT L - COA R	-0.106682	-0.109481		HT	HT L - COA R	0.162667	0.165785
HT	HT L - CSm L	0.155844	0.159017		HT	HT L - CSm L	-0.14533	-0.149195		HT	HT L - CSm L	-0.0521406	-0.0548272
HT	HT L - CSm R	0.0630515	0.0644752		HT	HT L - CSm R	-0.179216	-0.181397		HT	HT L - CSm R	0.0207262	0.0199508
HT	HT L - HT R	-0.00210498	-0.00405855		HT	HT L - HT R	-0.0453618	-0.0854229		HT	HT L - HT R	0.029619	0.0504987
HT	HT L - IC L	0.09511	0.0980273		HT	HT L - IC L	0.117699	0.120489		HT	HT L - IC L	-0.0776174	-0.0796559
HT	HT L - IC R	-0.205743	-0.210199		HT	HT L - IC R	0.00477754	0.00627354		HT	HT L - IC R	0.0669341	0.0659906
HT	HT L - MB R	0.031141	0.0311556		HT	HT L - MB R	-0.177958	-0.179901		HT	HT L - MB R	0.0653675	0.0655372
HT	HT L - MRN L	0.247213	0.255825		HT	HT L - MRN L	-0.0183827	-0.0142798		HT	HT L - MRN L	-0.0208226	-0.0258109
HT	HT L - MRN R	0.0395317	0.0399163		HT	HT L - MRN R	-0.150157	-0.152855		HT	HT L - MRN R	0.0099137	0.00969329
HT	HT L - MY L	0.0920969	0.0937777		HT	HT L - MY L	-0.131407	-0.133357		HT	HT L - MY L	-0.0994548	-0.101377
HT	HT L - MY R	0.0637002	0.0642392		HT	HT L - MY R	-0.104756	-0.10547		HT	HT L - MY R	-0.0859474	-0.0866239
HT	HT L - NBM L	0.106685	0.137347		HT	HT L - NBM L	-0.0401158	-0.0613362		HT	HT L - NBM L	-0.0843807	-0.106697
HT	HT L - NBM R	-0.110438	-0.11407		HT	HT L - NBM R	-0.0579158	-0.0611095		HT	HT L - NBM R	0.0664033	0.0663527
HT	HT L - OLF L	-0.0170992	-0.0285465		HT	HT L - OLF L	-0.0797492	-0.103083		HT	HT L - OLF L	-0.0830221	-0.0982871
HT	HT L - OLF R	-0.0759525	-0.0773611		HT	HT L - OLF R	-0.116751	-0.118089		HT	HT L - OLF R	0.0837548	0.0835545
HT	HT L - PAG L	0.174913	0.187034		HT	HT L - PAG L	0.0335768	0.0380421		HT	HT L - PAG L	-0.00226724	-0.0057988
HT	HT L - PAG R	0.132385	0.138809		HT	HT L - PAG R	0.000761057	0.00271298		HT	HT L - PAG R	0.0226292	0.0219457
HT	HT L - PB L	0.114358	0.125455		HT	HT L - PB L	0.0482585	0.0559936		HT	HT L - PB L	0.0312583	0.026986
HT	HT L - PB R	-0.131607	-0.133077		HT	HT L - PB R	-0.0495062	-0.0509461		HT	HT L - PB R	0.0725258	0.0737657
HT	HT L - PRNr L	0.263939	0.270374		HT	HT L - PRNr L	-0.119947	-0.124362		HT	HT L - PRNr L	-0.0705111	-0.0724119
HT	HT L - PRNr R	-0.0454919	-0.0456735		HT	HT L - PRNr R	-0.109181	-0.109834		HT	HT L - PRNr R	0.104668	0.106157
HT	HT L - RHP L	0.103801	0.112878		HT	HT L - RHP L	0.181735	0.187292		HT	HT L - RHP L	-0.106328	-0.110964
HT	HT L - RHP R	-0.242513	-0.248074		HT	HT L - RHP R	-0.0402378	-0.0415454		HT	HT L - RHP R	0.0919983	0.0933443
HT	HT L - SC L	0.19452	0.202638		HT	HT L - SC L	0.0980042	0.104142		HT	HT L - SC L	-0.0866634	-0.0895154
HT	HT L - SC R	-0.0489481	-0.050846		HT	HT L - SC R	0.058955	0.0601686		HT	HT L - SC R	-0.00939199	-0.0108469
HT	HT L - SN L	0.0396978	0.0379258		HT	HT L - SN L	0.043783	0.0530954		HT	HT L - SN L	0.112177	0.122739
HT	HT L - SN R	0.126348	0.130566		HT	HT L - SN R	-0.168804	-0.173228		HT	HT L - SN R	0.00296672	0.00452505
HT	HT L - STN L	0.0476976	0.0867726		HT	HT L - STN L	-0.00934344	-0.0235436		HT	HT L - STN L	-0.0480025	-0.0803417
HT	HT L - STN R	-0.078333	-0.0855012		HT	HT L - STN R	-0.0733481	-0.0818269		HT	HT L - STN R	-0.00361722	-0.00422715
HT	HT L - VTA L	0.00396803	0.0137523		HT	HT L - VTA L	0.0463679	0.0679042		HT	HT L - VTA L	-0.0650044	-0.0973247
HT	HT L - VTA R	0.00390659	0.0046044		HT	HT L - VTA R	-0.104337	-0.114552		HT	HT L - VTA R	0.0358638	0.0378406
HT	HT L - ZI L	0.0737626	0.154172		HT	HT L - ZI L	-0.045104	-0.108857		HT	HT L - ZI L	-0.0495584	-0.0982251
HT	HT L - ZI R	0.0201505	0.0255898		HT	HT L - ZI R	-0.0417157	-0.0487705		HT	HT L - ZI R	0.0300864	0.0338913
HT	HT R - CB L	0.0516617	0.0583639		HT	HT R - CB L	-0.00984574	-0.00801785		HT	HT R - CB L	-0.0597195	-0.0668042
HT	HT R - CB R	-0.193321	-0.20988		HT	HT R - CB R	0.0394738	0.0432769		HT	HT R - CB R	-0.00866759	-0.0101081
HT	HT R - COA L	0.207678	0.210367		HT	HT R - COA L	-0.142764	-0.144145		HT	HT R - COA L	-0.0753162	-0.0764525
HT	HT R - COA R	-0.0569933	-0.0613064		HT	HT R - COA R	-0.0871641	-0.117886		HT	HT R - COA R	0.0319335	0.0448475
HT	HT R - CSm L	0.0395492	0.039093		HT	HT R - CSm L	-0.101898	-0.103622		HT	HT R - CSm L	-0.0728524	-0.0741768
HT	HT R - CSm R	-0.00225315	-0.00274121		HT	HT R - CSm R	-0.134693	-0.136989		HT	HT R - CSm R	-0.0657976	-0.0674359
HT	HT R - IC L	-0.034938	-0.0354842		HT	HT R - IC L	0.0392119	0.0390639		HT	HT R - IC L	-0.0417065	-0.0415942
HT	HT R - IC R	-0.174898	-0.182293		HT	HT R - IC R	0.0562005	0.0595939		HT	HT R - IC R	0.057884	0.0565758
HT	HT R - MB R	0.00112192	0.00107817		HT	HT R - MB R	-0.0584365	-0.0586514		HT	HT R - MB R	0.0252721	0.0254337
HT	HT R - MRN L	0.0993408	0.101347		HT	HT R - MRN L	0.0509403	0.0523148		HT	HT R - MRN L	-0.010833	-0.00884952
HT	HT R - MRN R	0.023409	0.022777		HT	HT R - MRN R	0.0218399	0.0227609		HT	HT R - MRN R	-0.0325619	-0.0329276
HT	HT R - MY L	-0.0721439	-0.0757651		HT	HT R - MY L	-0.101502	-0.102189		HT	HT R - MY L	-0.194548	-0.19941
HT	HT R - MY R	-0.0839271	-0.0864644		HT	HT R - MY R	-0.0759731	-0.0757426		HT	HT R - MY R	-0.150515	-0.153599
HT	HT R - NBM L	0.145056	0.149428		HT	HT R - NBM L	0.0116512	0.00812039		HT	HT R - NBM L	-0.03081	-0.0286403
HT	HT R - NBM R	-0.145622	-0.225264		HT	HT R - NBM R	-0.0995199	-0.154084		HT	HT R - NBM R	0.114128	0.171713
HT	HT R - OLF L	0.0437486	0.0473663		HT	HT R - OLF L	-0.194854	-0.201191		HT	HT R - OLF L	-0.00810027	-0.00746803
HT	HT R - OLF R	-0.103123	-0.145141		HT	HT R - OLF R	-0.0638631	-0.100112		HT	HT R - OLF R	0.00168829	0.00445982
HT	HT R - PAG L	0.0188753	0.0199973		HT	HT R - PAG L	0.10331	0.110515		HT	HT R - PAG L	0.00226008	0.00299338
HT	HT R - PAG R	0.0444667	0.0467398		HT	HT R - PAG R	0.0695434	0.0761081		HT	HT R - PAG R	0.00991132	0.0101299
HT	HT R - PB L	0.0223963	0.0218445		HT	HT R - PB L	0.0625735	0.064526		HT	HT R - PB L	-0.0101964	-0.010267
HT	HT R - PB R	-0.192791	-0.20146		HT	HT R - PB R	0.0484534	0.0489886		HT	HT R - PB R	0.0728055	0.0756451
HT	HT R - PRNr L	0.169149	0.172513		HT	HT R - PRNr L	-0.0714325	-0.0734929		HT	HT R - PRNr L	-0.108766	-0.108459
HT	HT R - PRNr R	-0.150815	-0.15252		HT	HT R - PRNr R	-0.0634627	-0.0641232		HT	HT R - PRNr R	0.00436292	0.00403439
HT	HT R - RHP L	0.0826122	0.093955		HT	HT R - RHP L	0.272504	0.288399		HT	HT R - RHP L	-0.05887	-0.0504421
HT	HT R - RHP R	-0.107177	-0.108879		HT	HT R - RHP R	0.00828977	0.00938165		HT	HT R - RHP R	0.101676	0.10213
HT	HT R - SC L	0.120407	0.129248		HT	HT R - SC L	0.154334	0.162657		HT	HT R - SC L	-0.0820237	-0.0785837
HT	HT R - SC R	0.0124863	0.0104735		HT	HT R - SC R	0.0921193	0.0954106		HT	HT R - SC R	-0.0607331	-0.0636216
HT	HT R - SN L	-0.0424482	-0.0438722		HT	HT R - SN L	-0.103881	-0.106894		HT	HT R - SN L	0.0462755	0.0464294
HT	HT R - SN R	0.169566	0.184702		HT	HT R - SN R	-0.0769383	-0.0883052		HT	HT R - SN R	-0.0372049	-0.0411617
HT	HT R - STN L	0.0304565	0.0345227		HT	HT R - STN L	-0.0269802	-0.0307151		HT	HT R - STN L	-0.0365526	-0.0455232
HT	HT R - STN R	-0.060333	-0.0810751		HT	HT R - STN R	-0.00908971	-0.015527		HT	HT R - STN R	-0.0612392	-0.102954
HT	HT R - VTA L	0.00777895	0.0111412		HT	HT R - VTA L	-0.0468638	-0.0513443		HT	HT R - VTA L	-0.0932603	-0.108646
HT	HT R - VTA R	-0.106719	-0.150108		HT	HT R - VTA R	-0.0107684	-0.0271478		HT	HT R - VTA R	0.0059006	0.0188621
HT	HT R - ZI L	0.0659817	0.0836888		HT	HT R - ZI L	-0.013122	-0.0189734		HT	HT R - ZI L	-0.000274171	0.00249921
HT	HT R - ZI R	-0.0334162	-0.0553274		HT	HT R - ZI R	-0.0166279	-0.0301833		HT	HT R - ZI R	-0.00536724	-0.0139383
IC	IC L - CB L	0.0608015	0.0870125		IC	IC L - CB L	0.00829019	0.0180088		IC	IC L - CB L	-0.0669224	-0.0954792
IC	IC L - CB R	0.0699628	0.0713122		IC	IC L - CB R	0.0653653	0.0675887		IC	IC L - CB R	-0.000580944	-0.000894546
IC	IC L - COA L	-0.111162	-0.113329		IC	IC L - COA L	0.0983747	0.100571		IC	IC L - COA L	0.0133544	0.0134705
IC	IC L - COA R	-0.112193	-0.114315		IC	IC L - COA R	-0.0377403	-0.0396128		IC	IC L - COA R	0.0480574	0.0500703
IC	IC L - CSm L	0.0498857	0.0472541		IC	IC L - CSm L	-0.088616	-0.0918598		IC	IC L - CSm L	0.0287409	0.0316784
IC	IC L - CSm R	0.0884044	0.0890304		IC	IC L - CSm R	-0.103478	-0.10624		IC	IC L - CSm R	0.0352928	0.0376553
IC	IC L - IC R	0.163665	0.16949		IC	IC L - IC R	0.11169	0.116541		IC	IC L - IC R	-0.0860829	-0.0914366
IC	IC L - MRN L	-0.0406658	-0.0606791		IC	IC L - MRN L	-0.0901051	-0.106958		IC	IC L - MRN L	0.0243056	0.0378586
IC	IC L - MRN R	0.0565848	0.0709523		IC	IC L - MRN R	-0.107831	-0.124216		IC	IC L - MRN R	0.183685	0.203408
IC	IC L - MY L	-0.133364	-0.135867		IC	IC L - MY L	0.0773662	0.0780417		IC	IC L - MY L	0.0237041	0.0244846
IC	IC L - MY R	-0.149553	-0.152504		IC	IC L - MY R	0.0650476	0.0648423		IC	IC L - MY R	0.0347873	0.0360341
IC	IC L - NBM L	0.180478	0.186373		IC	IC L - NBM L	0.0733026	0.0782757		IC	IC L - NBM L	0.0308081	0.0343342
IC	IC L - NBM R	-0.0202586	-0.0206532		IC	IC L - NBM R	-0.0179382	-0.0183306		IC	IC L - NBM R	0.0470123	0.0474178
IC	IC L - OLF L	-0.0770528	-0.0773169		IC	IC L - OLF L	0.128734	0.12943		IC	IC L - OLF L	-0.00335001	-0.00336322
IC	IC L - OLF R	-0.0741953	-0.0785502		IC	IC L - OLF R	0.0330309	0.0306482		IC	IC L - OLF R	0.0199224	0.0228875
IC	IC L - PAG L	0.0204788	0.0447639		IC	IC L - PAG L	0.0840122	0.12891		IC	IC L - PAG L	-0.106916	-0.153436
IC	IC L - PAG R	0.054201	0.0597479		IC	IC L - PAG R	0.0414266	0.0490938		IC	IC L - PAG R	-0.0309106	-0.036758
IC	IC L - PB L	0.0323994	0.0382732		IC	IC L - PB L	-0.0577245	-0.0701187		IC	IC L - PB L	-0.0377392	-0.0358726
IC	IC L - PB R	0.116239	0.123791		IC	IC L - PB R	-0.0423845	-0.0496586		IC	IC L - PB R	0.0639519	0.0729819
IC	IC L - PRNr L	-0.0755389	-0.0777568		IC	IC L - PRNr L	-0.0826122	-0.0839242		IC	IC L - PRNr L	-0.010227	-0.0111524
IC	IC L - PRNr R	0.0854347	0.0870227		IC	IC L - PRNr R	-0.159339	-0.163585		IC	IC L - PRNr R	0.125628	0.129038
IC	IC L - RHP L	-0.16858	-0.189097		IC	IC L - RHP L	0.0168015	0.0157042		IC	IC L - RHP L	0.0245203	0.0389505
IC	IC L - RHP R	0.0940814	0.10436		IC	IC L - RHP R	-0.0305066	-0.0415728		IC	IC L - RHP R	0.0212595	0.0395575
IC	IC L - SC L	-0.0935355	-0.223365		IC	IC L - SC L	0.159273	0.325179		IC	IC L - SC L	0.00561808	-0.0348619
IC	IC L - SC R	-0.0505825	-0.0485153		IC	IC L - SC R	0.0937663	0.101492		IC	IC L - SC R	-0.0293958	-0.0333492
IC	IC L - SN L	-0.0909633	-0.09202		IC	IC L - SN L	-0.0371166	-0.0387575		IC	IC L - SN L	-0.0746963	-0.0760487
IC	IC L - SN R	-0.0167642	-0.0142475		IC	IC L - SN R	-0.0340259	-0.0384554		IC	IC L - SN R	0.101506	0.103853
IC	IC L - STN L	-0.0638767	-0.0644873		IC	IC L - STN L	0.0632838	0.0638395		IC	IC L - STN L	-0.000446403	-0.000630842
IC	IC L - STN R	0.0110586	0.00966328		IC	IC L - STN R	0.00893742	0.00651602		IC	IC L - STN R	0.0314604	0.03494
IC	IC L - VTA L	-0.0508168	-0.0519858		IC	IC L - VTA L	0.085971	0.0874116		IC	IC L - VTA L	0.024284	0.0248372
IC	IC L - VTA R	-0.0259389	-0.0281351		IC	IC L - VTA R	-0.0344297	-0.0341546		IC	IC L - VTA R	0.0271627	0.0263818
IC	IC L - ZI L	-0.0838066	-0.084838		IC	IC L - ZI L	0.081343	0.0823649		IC	IC L - ZI L	0.0323494	0.0325334
IC	IC L - ZI R	-0.0630587	-0.0660441		IC	IC L - ZI R	-0.056846	-0.0577317		IC	IC L - ZI R	0.0127042	0.0125269
IC	IC R - CB L	0.147026	0.143651		IC	IC R - CB L	0.171482	0.181749		IC	IC R - CB L	-0.0483703	-0.0440681
IC	IC R - CB R	0.00716779	0.0178062		IC	IC R - CB R	-0.0345263	-0.0462779		IC	IC R - CB R	0.0791855	0.117653
IC	IC R - COA L	0.0173466	0.0131518		IC	IC R - COA L	-0.047642	-0.0438421		IC	IC R - COA L	-0.18269	-0.19578
IC	IC R - COA R	-0.0812562	-0.0879934		IC	IC R - COA R	0.0589227	0.0643281		IC	IC R - COA R	0.00574853	0.000201246
IC	IC R - CSm L	0.0476997	0.0477779		IC	IC R - CSm L	0.0382399	0.0389		IC	IC R - CSm L	0.0800853	0.0806934
IC	IC R - CSm R	0.0499591	0.0500668		IC	IC R - CSm R	0.0617358	0.0622371		IC	IC R - CSm R	0.0169902	0.017265
IC	IC R - MRN L	0.0353833	0.0381357		IC	IC R - MRN L	-0.0688056	-0.0726511		IC	IC R - MRN L	0.122959	0.12704
IC	IC R - MRN R	-0.0165869	-0.0169976		IC	IC R - MRN R	-0.06197	-0.0647382		IC	IC R - MRN R	0.0410411	0.042476
IC	IC R - MY L	0.144598	0.147275		IC	IC R - MY L	-0.00117624	-0.00220577		IC	IC R - MY L	-0.0401323	-0.0414164
IC	IC R - MY R	0.11857	0.119207		IC	IC R - MY R	-0.0258067	-0.0260034		IC	IC R - MY R	-0.00966417	-0.00932522
IC	IC R - NBM L	0.0310337	0.0316029		IC	IC R - NBM L	-0.0612605	-0.0612498		IC	IC R - NBM L	0.0449647	0.044917
IC	IC R - NBM R	-0.0627961	-0.0605168		IC	IC R - NBM R	0.149598	0.153529		IC	IC R - NBM R	0.0450793	0.0489547
IC	IC R - OLF L	-0.0653728	-0.0704767		IC	IC R - OLF L	0.0624052	0.0675835		IC	IC R - OLF L	-0.114758	-0.120255
IC	IC R - OLF R	-0.0370841	-0.0385066		IC	IC R - OLF R	0.0754206	0.0770464		IC	IC R - OLF R	0.0147171	0.0151543
IC	IC R - PAG L	0.180019	0.20227		IC	IC R - PAG L	0.0352648	0.0250141		IC	IC R - PAG L	0.034996	0.0485461
IC	IC R - PAG R	0.11186	0.137906		IC	IC R - PAG R	0.0426615	0.0418005		IC	IC R - PAG R	-0.0290758	-0.0236848
IC	IC R - PB L	0.238783	0.250556		IC	IC R - PB L	-0.00527473	-0.0126574		IC	IC R - PB L	0.0447295	0.0536698
IC	IC R - PB R	0.0417285	0.0462417		IC	IC R - PB R	0.0202534	0.0247887		IC	IC R - PB R	-0.0743075	-0.0807642
IC	IC R - PRNr L	0.135191	0.136614		IC	IC R - PRNr L	-0.0520962	-0.0538969		IC	IC R - PRNr L	-0.0231943	-0.0229802
IC	IC R - PRNr R	0.0327036	0.0323186		IC	IC R - PRNr R	-0.0350934	-0.0355773		IC	IC R - PRNr R	0.0617065	0.062374
IC	IC R - RHP L	0.186154	0.214292		IC	IC R - RHP L	-0.178324	-0.20277		IC	IC R - RHP L	-0.0175019	-0.0141676
IC	IC R - RHP R	-0.139883	-0.194439		IC	IC R - RHP R	-0.111443	-0.146845		IC	IC R - RHP R	0.108284	0.137433
IC	IC R - SC L	0.104466	0.10286		IC	IC R - SC L	-0.0294103	-0.03498		IC	IC R - SC L	-0.116227	-0.124062
IC	IC R - SC R	-0.0986377	-0.208524		IC	IC R - SC R	0.0611769	0.154265		IC	IC R - SC R	-0.00195401	-0.0165164
IC	IC R - SN L	-0.156267	-0.160369		IC	IC R - SN L	0.0873276	0.0892748		IC	IC R - SN L	0.0956905	0.0991575
IC	IC R - SN R	0.028274	0.0298234		IC	IC R - SN R	-0.0685621	-0.0704464		IC	IC R - SN R	-0.074276	-0.0813676
IC	IC R - STN L	-0.160541	-0.166122		IC	IC R - STN L	-0.100104	-0.100859		IC	IC R - STN L	-0.0191152	-0.0204171
IC	IC R - STN R	-0.0854148	-0.0910897		IC	IC R - STN R	0.0484492	0.0482549		IC	IC R - STN R	0.0461792	0.047103
IC	IC R - VTA L	-0.217051	-0.224801		IC	IC R - VTA L	0.00764582	0.00709252		IC	IC R - VTA L	0.143597	0.145881
IC	IC R - VTA R	-0.0371339	-0.0454713		IC	IC R - VTA R	0.0333502	0.041288		IC	IC R - VTA R	-0.0549476	-0.0637486
IC	IC R - ZI L	-0.172756	-0.178844		IC	IC R - ZI L	-0.0685018	-0.0682697		IC	IC R - ZI L	0.0283693	0.0275539
IC	IC R - ZI R	-0.179249	-0.190832		IC	IC R - ZI R	0.106838	0.108129		IC	IC R - ZI R	0.0999153	0.100101
ILA	ILA L - ACB L	0.0052403	0.00305998		ILA	ILA L - ACB L	0.111507	0.155135		ILA	ILA L - ACB L	-0.16004	-0.225954
ILA	ILA L - ACB R	0.251086	0.368097		ILA	ILA L - ACB R	-0.166307	-0.260532		ILA	ILA L - ACB R	-0.0440116	0.024621
ILA	ILA L - AI L	0.101006	0.0960763		ILA	ILA L - AI L	-0.0165876	0.00207618		ILA	ILA L - AI L	-0.266202	-0.321486
ILA	ILA L - AI R	0.213068	0.331057		ILA	ILA L - AI R	-0.0863784	-0.173391		ILA	ILA L - AI R	-0.107166	-0.0608853
ILA	ILA L - AMY L	0.00886477	0.00939769		ILA	ILA L - AMY L	-0.00392965	-0.00416724		ILA	ILA L - AMY L	-0.0939778	-0.0948508
ILA	ILA L - AMY R	0.177457	0.183393		ILA	ILA L - AMY R	-0.163159	-0.169582		ILA	ILA L - AMY R	-0.0947856	-0.0985268
ILA	ILA L - CB L	0.0492195	0.0486406		ILA	ILA L - CB L	0.0175562	0.0173586		ILA	ILA L - CB L	0.024722	0.0254386
ILA	ILA L - CB R	-0.0597984	-0.058153		ILA	ILA L - CB R	0.12725	0.13187		ILA	ILA L - CB R	0.0622079	0.0606603
ILA	ILA L - COA L	0.163139	0.168927		ILA	ILA L - COA L	-0.203924	-0.209789		ILA	ILA L - COA L	0.0318942	0.0317222
ILA	ILA L - COA R	0.0546862	0.0589334		ILA	ILA L - COA R	-0.0232923	-0.0273419		ILA	ILA L - COA R	-0.0988261	-0.103133
ILA	ILA L - CP L	-0.0505606	-0.0747722		ILA	ILA L - CP L	0.0256106	0.0479073		ILA	ILA L - CP L	-0.152944	-0.190967
ILA	ILA L - CP R	0.263256	0.31111		ILA	ILA L - CP R	-0.0842167	-0.102221		ILA	ILA L - CP R	-0.184061	-0.204304
ILA	ILA L - CSm L	0.0582648	0.0576964		ILA	ILA L - CSm L	0.0846288	0.0881183		ILA	ILA L - CSm L	-0.00998128	-0.00675672
ILA	ILA L - CSm R	0.0449173	0.0455194		ILA	ILA L - CSm R	0.035539	0.0365779		ILA	ILA L - CSm R	0.00144243	0.00330301
ILA	ILA L - ECT L	-0.0458394	-0.0513078		ILA	ILA L - ECT L	0.0933545	0.0998154		ILA	ILA L - ECT L	0.0848777	0.0900704
ILA	ILA L - ECT R	-0.0472198	-0.0499235		ILA	ILA L - ECT R	0.115166	0.118429		ILA	ILA L - ECT R	-0.0223526	-0.0251602
ILA	ILA L - ENT L	0.124735	0.126005		ILA	ILA L - ENT L	-0.0598962	-0.06063		ILA	ILA L - ENT L	-0.0287272	-0.028247
ILA	ILA L - ENT R	-0.0608913	-0.0611794		ILA	ILA L - ENT R	0.0225373	0.0230381		ILA	ILA L - ENT R	0.0138755	0.0137766
ILA	ILA L - FS L	0.119368	0.113352		ILA	ILA L - FS L	0.134769	0.156081		ILA	ILA L - FS L	-0.261709	-0.283996
ILA	ILA L - FS R	0.180994	0.19961		ILA	ILA L - FS R	-0.106957	-0.116191		ILA	ILA L - FS R	-0.0297874	-0.0311622
ILA	ILA L - HIP L	0.0945101	0.0986476		ILA	ILA L - HIP L	0.0992036	0.103235		ILA	ILA L - HIP L	0.0481314	0.0521824
ILA	ILA L - HIP R	-0.113469	-0.118392		ILA	ILA L - HIP R	-0.0925973	-0.0975413		ILA	ILA L - HIP R	0.0187094	0.0224232
ILA	ILA L - HT L	-0.0924554	-0.0956614		ILA	ILA L - HT L	-0.0650885	-0.0680553		ILA	ILA L - HT L	0.0531445	0.0559105
ILA	ILA L - HT R	0.0387215	0.042595		ILA	ILA L - HT R	-0.0963111	-0.103212		ILA	ILA L - HT R	-0.0143537	-0.0136362
ILA	ILA L - IC L	-0.070372	-0.0716174		ILA	ILA L - IC L	0.0430331	0.0426571		ILA	ILA L - IC L	0.0202123	0.0213812
ILA	ILA L - IC R	-0.118123	-0.119116		ILA	ILA L - IC R	0.0933829	0.0939888		ILA	ILA L - IC R	0.0768165	0.0772444
ILA	ILA L - ILA R	0.0173878	0.209081		ILA	ILA L - ILA R	-0.0158478	-0.196441		ILA	ILA L - ILA R	-0.00432623	0.140579
ILA	ILA L - LSX L	-0.0895999	-0.127348		ILA	ILA L - LSX L	0.0319732	0.0213067		ILA	ILA L - LSX L	0.0254218	0.00837699
ILA	ILA L - LSX R	0.0333811	0.0689134		ILA	ILA L - LSX R	-0.0844973	-0.169998		ILA	ILA L - LSX R	0.0088643	0.0231488
ILA	ILA L - MB R	-0.0676441	-0.0699582		ILA	ILA L - MB R	-0.0237804	-0.0233668		ILA	ILA L - MB R	0.0908934	0.0951375
ILA	ILA L - MOB R	-0.0125166	-0.0231381		ILA	ILA L - MOB R	0.127605	0.174001		ILA	ILA L - MOB R	-0.208113	-0.29632
ILA	ILA L - MRN L	0.101793	0.102897		ILA	ILA L - MRN L	0.105795	0.115133		ILA	ILA L - MRN L	0.0580961	0.0729922
ILA	ILA L - MRN R	-0.00815652	-0.0103168		ILA	ILA L - MRN R	-0.000895956	0.00595024		ILA	ILA L - MRN R	0.0872657	0.0958246
ILA	ILA L - MY L	-0.0125857	-0.0140362		ILA	ILA L - MY L	0.0722388	0.0738696		ILA	ILA L - MY L	-3.83093e-05	0.000118609
ILA	ILA L - MY R	-0.0384076	-0.0406456		ILA	ILA L - MY R	0.040841	0.0426207		ILA	ILA L - MY R	0.0677245	0.0695174
ILA	ILA L - NBM L	0.020771	0.0235453		ILA	ILA L - NBM L	-0.0856074	-0.0891992		ILA	ILA L - NBM L	-0.0953498	-0.0947476
ILA	ILA L - NBM R	0.185533	0.211688		ILA	ILA L - NBM R	-0.2203	-0.2469		ILA	ILA L - NBM R	0.0050815	0.0103585
ILA	ILA L - OLF L	0.0804078	0.0892031		ILA	ILA L - OLF L	-0.0728205	-0.0808437		ILA	ILA L - OLF L	-0.0390607	-0.0404378
ILA	ILA L - OLF R	0.120381	0.139749		ILA	ILA L - OLF R	-0.0906662	-0.106319		ILA	ILA L - OLF R	-0.11823	-0.13562
ILA	ILA L - ORB L	-0.0276808	-0.149721		ILA	ILA L - ORB L	-0.00804864	-0.0195349		ILA	ILA L - ORB L	0.00702873	0.022964
ILA	ILA L - ORB R	0.0746064	0.185451		ILA	ILA L - ORB R	-0.0103356	-0.0554713		ILA	ILA L - ORB R	-0.0597908	-0.0970102
ILA	ILA L - OT L	0.0319307	0.0291018		ILA	ILA L - OT L	0.0466664	0.0616624		ILA	ILA L - OT L	-0.203413	-0.222085
ILA	ILA L - OT R	0.13565	0.150481		ILA	ILA L - OT R	-0.184625	-0.200983		ILA	ILA L - OT R	0.00111083	0.0117038
ILA	ILA L - PAG L	0.113938	0.119921		ILA	ILA L - PAG L	0.0609547	0.0670169		ILA	ILA L - PAG L	0.0316831	0.0416228
ILA	ILA L - PAG R	0.0712454	0.0728936		ILA	ILA L - PAG R	0.0175221	0.0258001		ILA	ILA L - PAG R	0.105686	0.123364
ILA	ILA L - PALc L	-0.186026	-0.207194		ILA	ILA L - PALc L	0.0441293	0.0501581		ILA	ILA L - PALc L	-0.0778105	-0.0917501
ILA	ILA L - PALc R	0.0628001	0.0759837		ILA	ILA L - PALc R	-0.0231982	-0.0271476		ILA	ILA L - PALc R	-0.083324	-0.0897675
ILA	ILA L - PALd L	-0.13986	-0.142344		ILA	ILA L - PALd L	0.0467204	0.0484765		ILA	ILA L - PALd L	-0.0214816	-0.0216139
ILA	ILA L - PALd R	0.249984	0.258998		ILA	ILA L - PALd R	-0.0494975	-0.0506319		ILA	ILA L - PALd R	-0.312261	-0.32215
ILA	ILA L - PALm L	-0.0298382	-0.03798		ILA	ILA L - PALm L	-0.0460769	-0.0347205		ILA	ILA L - PALm L	-0.0822812	-0.10221
ILA	ILA L - PALm R	0.0760825	0.0929244		ILA	ILA L - PALm R	-0.118179	-0.132783		ILA	ILA L - PALm R	-0.0155313	-0.0127318
ILA	ILA L - PALv L	0.0313263	0.0265233		ILA	ILA L - PALv L	0.0880256	0.106085		ILA	ILA L - PALv L	-0.222761	-0.243703
ILA	ILA L - PALv R	0.232784	0.266437		ILA	ILA L - PALv R	-0.203279	-0.233031		ILA	ILA L - PALv R	-0.022747	-0.00782791
ILA	ILA L - PB L	0.162149	0.166488		ILA	ILA L - PB L	0.0654163	0.0689682		ILA	ILA L - PB L	-0.055597	-0.0578002
ILA	ILA L - PB R	-0.0450337	-0.0446946		ILA	ILA L - PB R	0.0929137	0.0997773		ILA	ILA L - PB R	0.0814396	0.0864467
ILA	ILA L - PERI L	0.0752673	0.0769513		ILA	ILA L - PERI L	-0.0611043	-0.062523		ILA	ILA L - PERI L	0.0176892	0.0177683
ILA	ILA L - PERI R	0.029721	0.0294343		ILA	ILA L - PERI R	0.091209	0.0924728		ILA	ILA L - PERI R	-0.122512	-0.123861
ILA	ILA L - PIR L	0.155294	0.160088		ILA	ILA L - PIR L	-0.067492	-0.0683202		ILA	ILA L - PIR L	-0.21532	-0.225896
ILA	ILA L - PIR R	0.3009	0.382007		ILA	ILA L - PIR R	-0.174169	-0.237827		ILA	ILA L - PIR R	-0.060961	-0.0269102
ILA	ILA L - PRNr L	0.136243	0.137773		ILA	ILA L - PRNr L	0.0804296	0.083284		ILA	ILA L - PRNr L	-0.0714288	-0.073308
ILA	ILA L - PRNr R	-0.127949	-0.132903		ILA	ILA L - PRNr R	0.0898904	0.0952762		ILA	ILA L - PRNr R	0.0616906	0.0599567
ILA	ILA L - PTLp L	-0.0224173	-0.0243667		ILA	ILA L - PTLp L	0.156641	0.167326		ILA	ILA L - PTLp L	-0.172775	-0.18276
ILA	ILA L - PTLp R	-0.148815	-0.152408		ILA	ILA L - PTLp R	0.040184	0.039865		ILA	ILA L - PTLp R	-0.162985	-0.166154
ILA	ILA L - RHP L	0.0225066	0.0234619		ILA	ILA L - RHP L	0.153242	0.155641		ILA	ILA L - RHP L	0.0158168	0.0153286
ILA	ILA L - RHP R	-0.131695	-0.133744		ILA	ILA L - RHP R	0.00109552	-0.000752082		ILA	ILA L - RHP R	0.182799	0.185932
ILA	ILA L - RSP L	0.00704934	0.00588481		ILA	ILA L - RSP L	0.124166	0.12623		ILA	ILA L - RSP L	-0.113953	-0.116012
ILA	ILA L - RSP R	-0.032946	-0.0342748		ILA	ILA L - RSP R	0.113612	0.116102		ILA	ILA L - RSP R	-0.173598	-0.176541
ILA	ILA L - SC L	-0.00746237	-0.00884756		ILA	ILA L - SC L	0.146888	0.15702		ILA	ILA L - SC L	0.0206975	0.0224213
ILA	ILA L - SC R	-0.0706666	-0.0726688		ILA	ILA L - SC R	0.0756562	0.0771106		ILA	ILA L - SC R	0.0444949	0.0464938
ILA	ILA L - SN L	0.0268522	0.027131		ILA	ILA L - SN L	0.0951557	0.0956574		ILA	ILA L - SN L	-0.0055543	-0.00580119
ILA	ILA L - SN R	0.0236912	0.0246163		ILA	ILA L - SN R	-0.0542866	-0.055514		ILA	ILA L - SN R	-0.0423302	-0.044669
ILA	ILA L - STN L	-0.0438971	-0.0451637		ILA	ILA L - STN L	-0.0459601	-0.0474778		ILA	ILA L - STN L	-0.0136511	-0.0146261
ILA	ILA L - STN R	-0.00882116	-0.00900152		ILA	ILA L - STN R	-0.0640234	-0.0649753		ILA	ILA L - STN R	-0.0727539	-0.0736812
ILA	ILA L - TEa L	-0.0122932	-0.0155369		ILA	ILA L - TEa L	0.0522715	0.0565002		ILA	ILA L - TEa L	0.0578922	0.0606895
ILA	ILA L - TEa R	-0.0352118	-0.0357328		ILA	ILA L - TEa R	0.0756641	0.0784877		ILA	ILA L - TEa R	-0.0114269	-0.0132905
ILA	ILA L - TH L	0.0639046	0.0614949		ILA	ILA L - TH L	0.144143	0.153045		ILA	ILA L - TH L	0.0256609	0.0329513
ILA	ILA L - TH R	-0.075509	-0.0780201		ILA	ILA L - TH R	0.0853306	0.088753		ILA	ILA L - TH R	-0.0367425	-0.0366136
ILA	ILA L - VTA L	-0.0439945	-0.0443919		ILA	ILA L - VTA L	0.0438758	0.0442759		ILA	ILA L - VTA L	0.0834214	0.0839315
ILA	ILA L - VTA R	-0.0310999	-0.0317878		ILA	ILA L - VTA R	0.0697327	0.0708411		ILA	ILA L - VTA R	-0.0269159	-0.0279311
ILA	ILA L - ZI L	-0.0266059	-0.0267366		ILA	ILA L - ZI L	-0.0169402	-0.0168326		ILA	ILA L - ZI L	0.015913	0.0160652
ILA	ILA L - ZI R	-0.0386254	-0.0384354		ILA	ILA L - ZI R	-0.03017	-0.0308485		ILA	ILA L - ZI R	-0.0454263	-0.0459725
ILA	ILA R - ACB L	-0.0346044	-0.043911		ILA	ILA R - ACB L	0.0700498	0.0729244		ILA	ILA R - ACB L	-0.160386	-0.198031
ILA	ILA R - ACB R	0.230623	0.375947		ILA	ILA R - ACB R	-0.111482	-0.199086		ILA	ILA R - ACB R	-0.0732015	-0.0252325
ILA	ILA R - AI L	0.0677525	0.058087		ILA	ILA R - AI L	-0.0360128	-0.0231593		ILA	ILA R - AI L	-0.207029	-0.233713
ILA	ILA R - AI R	0.217867	0.431303		ILA	ILA R - AI R	-0.112205	-0.256075		ILA	ILA R - AI R	-0.122316	-0.129637
ILA	ILA R - AMY L	-0.0779605	-0.0790761		ILA	ILA R - AMY L	0.00854622	0.00868826		ILA	ILA R - AMY L	-0.111898	-0.113609
ILA	ILA R - AMY R	0.172211	0.175681		ILA	ILA R - AMY R	-0.214052	-0.219469		ILA	ILA R - AMY R	-0.133252	-0.137224
[truncated: 7,902 more rows]
