# Supplementary material for: Dissociation of impulsive traits by subthalamic metabotropic glutamate receptor 4
Source: eLife. 2022 Jan 4;11:e62123. doi: 10.7554/eLife.62123 (PMC8803315; doi:10.7554/eLife.62123)
Supplement: Figure 1—source data 1. [file elife-62123-fig1-data1.xlsx]

## Sheet: Figure 1C
Raw data for Figure 1 C i: Precue response rate
	High impulsive					Low impulsive
	A1C1	A4C4	A1C2	A3C1	A2C1	A5C2	A3C2	A3C4	A2C2	A5C4
S18	0.0479503	0.0433058	0.0314293	0.0371026	0.0251606	0.0113674	0.031935	0.0226734	0.0142721	0.0110962
S19	0.0299192	0.0465361	0.0634057	0.0357647	0.0224662	0.0222661	0.0209588	0.0201213	0.0147851	0.0228767
S20	0.0331524	0.0531343	0.0751512	0.0668912	0.015148	0.01647	0.0218016	0.0274509	0.0236294	0.0224748
Raw data for Figure 1 C ii: % NG trials with FA
	High impulsive					Low impulsive
S18	32	22.2222	25.9259	23.0769	39.2857	10.3448	27.5862	10.7143	6.89655	17.2414
S19	37.931	24	52.1739	30.7692	34.6154	29.6296	21.4286	11.1111	20	24
S20	23.0769	30.4348	61.9048	43.4783	27.5862	25	15.3846	11.5385	17.2414	3.7037
Raw data for Figure 1 C iii: % of correct Go trials
	High impulsive					Low impulsive
S18	100	100	96.2963	92.8571	100	100	100	100	96.2963	96.6667
S19	100	100	100	100	100	100	100	100	100	100
S20	100	100	100	100	100	100	100	100	100	100

## Sheet: Figure 1E
Figure 1 E i								Figure 1 E ii								Figure 1 E iii
Node	p value	t value	Delta Fisher Z	Delta Correlation	Bonferonni corrected p value	z-score t-value		Node	p value	t value	Delta Fisher Z	Delta Correlation	Bonferonni corrected p value	z-score t-value		Node	p value	t value	Delta Fisher Z	Delta Correlation	Bonferonni corrected p value	z-score t-value
ACA	0.0018135	3.16219	0.0283771	0.0166627	0.00234688	0.686049		ACA	0.00201845	-3.12928	-0.0209358	-0.0279291	0.000874662	-0.145547		ACA	0.0743075	-1.79424	-0.0175916	-0.00291644	0.0630488	-0.376579
ACB	0.000151527	3.86367	0.0332632	0.021182	0.000303054	0.942649		ACB	0.00500661	-2.83856	-0.0204495	-0.0180418	0.0019723	-0.0726801		ACB	0.1799	-1.34584	-0.00980484	-0.00140289	0.132558	-0.219243
AI	4.40769e-05	4.17854	0.0369136	0.0263212	0.000107744	1.05783		AI	1.00424e-09	-6.41856	-0.0480804	-0.0447865	1.45057e-09	-0.969969		AI	0.456958	0.745335	0.00602293	0.00921009	0.290791	0.514513
AMY	1.32861e-06	-4.98916	-0.0345602	-0.0314583	4.87156e-06	-2.29572		AMY	0.00018442	-3.81178	-0.021747	-0.0197169	9.221e-05	-0.316608		AMY	0.444099	-0.766833	-0.00605703	-0.00425453	0.28918	-0.0160792
AUD	0.0225637	-2.29883	-0.0213241	-0.0217861	0.0171173	-1.31159		AUD	1.6197e-07	-5.43353	-0.0340744	-0.0319422	1.6197e-07	-0.72308		AUD	1.72052e-05	4.40697	0.039702	0.0352778	8.02909e-05	1.79931
CB	0.942395	0.0723529	0.000539845	0.00107393	0.406523	-0.444215		CB	0.00645291	2.75323	0.0157663	0.0152945	0.00246729	1.32884		CB	3.98481e-05	4.20347	0.0281737	0.0267677	0.000139468	1.72791
COA	0.239564	-1.17965	-0.0080278	-0.00676901	0.142443	-0.902197		COA	0.0149804	-2.45439	-0.0148231	-0.0128861	0.0054096	0.0236073		COA	0.0006358	-3.47159	-0.0230906	-0.0212562	0.00118683	-0.965127
CP	0.229589	1.20516	0.0121124	0.0059274	0.142302	-0.0298361		CP	1.48487e-05	-4.44194	-0.0319089	-0.0249194	9.65164e-06	-0.474551		CP	0.0265554	2.23477	0.0158717	0.015132	0.0297421	1.03713
CSm	5.99566e-11	6.92569	0.0453998	0.0395813	1.31905e-09	2.06274		CSm	0.698722	0.387611	0.00197727	0.000942042	0.185375	0.735924		CSm	3.44154e-07	-5.27738	-0.0476467	-0.0408855	3.21211e-06	-1.59875
ECT	0.0172886	2.40082	0.0183459	0.0193277	0.0135839	0.407537		ECT	0.241196	-1.17554	-0.00614876	-0.00482594	0.0729198	0.344137		ECT	0.327223	0.982166	0.00893652	0.00591282	0.223469	0.597612
ENT	0.00139843	3.24101	0.0253078	0.0242071	0.00192284	0.714881		ENT	0.922861	0.0969544	0.00055494	9.98957e-05	0.235239	0.663074		ENT	2.25374e-10	-6.69026	-0.045089	-0.043299	6.31048e-09	-2.0945
FRP	0.545488	0.605584	0.0045349	0.00287446	0.268007	-0.249159		FRP	1.08968e-06	-5.03218	-0.0332775	-0.0291655	8.33283e-07	-0.622487		FRP	0.0327981	-2.1497	-0.0170616	-0.0171258	0.0334611	-0.501302
FS	0.00400685	2.91189	0.02801	0.0269852	0.00440753	0.594486		FS	0.000778358	-3.41355	-0.0258471	-0.0229552	0.000361381	-0.216794		FS	0.739592	0.332862	0.00271248	0.00335755	0.431429	0.369784
GU	0.0109842	2.56752	0.0242258	0.0160311	0.0100689	0.468517		GU	1.42464e-11	-7.17615	-0.0519298	-0.0498178	3.70406e-11	-1.15985		GU	0.38319	0.873987	0.00709131	0.00899052	0.25546	0.559654
HIP	1.04026e-06	5.04221	0.0430011	0.0392034	4.57716e-06	1.37376		HIP	0.351507	-0.933884	-0.00535203	-0.00500368	0.101546	0.404706		HIP	0.723409	-0.354412	-0.00296687	-0.00318457	0.430967	0.128632
HT	0.0106031	-2.58016	-0.0207721	-0.0193296	0.0100689	-1.4145		HT	0.00291679	-3.01405	-0.0169307	-0.016194	0.00122317	-0.116664		HT	0.0100775	-2.59827	-0.018115	-0.0149613	0.0128259	-0.658698
IC	0.005974	-2.77937	-0.0212546	-0.0180185	0.005974	-1.48738		IC	0.122432	1.55131	0.00864714	0.00909388	0.0397904	1.02759		IC	0.000154133	3.85919	0.0253277	0.0232256	0.000331978	1.60711
ILA	0.000304392	3.67694	0.0350769	0.0224244	0.000558052	0.874343		ILA	3.6992e-06	-4.76258	-0.0416586	-0.0439949	2.67165e-06	-0.554914		ILA	0.237258	-1.18547	-0.00977518	0.00114778	0.16608	-0.162973
LSX	0.195449	1.29904	0.0114741	0.00289796	0.126467	0.00450651		LSX	0.231439	1.20037	0.00926148	0.00818351	0.0716358	0.939632		LSX	2.03666e-06	-4.89554	-0.0372613	-0.0277028	1.42566e-05	-1.46477
MB	0.0433975	2.04637	0.0218744	0.0173356	0.0307983	0.277882		MB	0.00147983	3.27102	0.0314255	0.0313858	0.00066337	1.45862		MB	2.09733e-05	-4.47074	-0.0458699	-0.0407525	8.38931e-05	-1.31571
MO	0.0159612	2.43079	0.0220089	0.0128955	0.0135056	0.418502		MO	4.20534e-16	-8.87819	-0.0569785	-0.055845	1.82231e-15	-1.58645		MO	0.169524	-1.37879	-0.0135873	-0.00375152	0.128289	-0.230802
MOB	0.00359066	2.98407	0.0260452	0.0260383	0.0041576	0.620893		MOB	3.9054e-11	-7.4393	-0.0705297	-0.0606096	8.46169e-11	-1.2258		MOB	0.0502666	1.98212	0.0237031	0.0199334	0.0469155	0.948477
MRN	5.50704e-10	6.52862	0.0543024	0.0501975	6.05775e-09	1.91749		MRN	1.27332e-08	5.9396	0.0389003	0.0353604	1.50483e-08	2.12747		MRN	0.000978792	-3.34688	-0.0321457	-0.0263778	0.00161213	-0.921372
MY	0.469396	-0.724864	-0.00518622	-0.00558375	0.245874	-0.735838		MY	1.84432e-05	-4.3904	-0.0246005	-0.0230679	1.11505e-05	-0.461631		MY	1.12137e-05	-4.50806	-0.0289063	-0.0283326	6.27965e-05	-1.32881
NBM	0.370788	0.897049	0.00719249	0.00723384	0.203933	-0.142541		NBM	0.821364	-0.226092	-0.00144632	-0.0018501	0.213555	0.582106		NBM	9.40882e-05	-3.9874	-0.0361243	-0.0299571	0.000239497	-1.14611
OLF	0.289424	1.06225	0.00712616	0.0074855	0.163265	-0.0821122		OLF	0.000647786	-3.46626	-0.0231223	-0.0187946	0.000311897	-0.230006		OLF	0.00757918	-2.69808	-0.0197512	-0.0166901	0.0101056	-0.693719
ORB	4.90977e-05	4.15175	0.0356319	0.0244271	0.000108015	1.04803		ORB	4.34393e-07	-5.22849	-0.0391133	-0.0400979	3.76474e-07	-0.671689		ORB	0.0334611	-2.14151	-0.0206602	-0.00758988	0.0334611	-0.498428
OT	0.0148567	2.45747	0.0179052	0.0157781	0.0130739	0.428259		OT	1.04787e-06	-5.04064	-0.0320647	-0.0272209	8.33283e-07	-0.624607		OT	0.114999	-1.58312	-0.00964961	-0.00667218	0.094705	-0.302498
PAG	7.03215e-07	5.12632	0.0418639	0.0384353	3.86768e-06	1.40453		PAG	3.35847e-10	6.61838	0.0430783	0.0382819	6.23716e-10	2.2976		PAG	0.628046	-0.48524	-0.00410803	-0.000762752	0.382289	0.0827269
PALc	0.0343177	-2.13113	-0.0202127	-0.0197376	0.0251663	-1.25025		PALc	0.662611	-0.436971	-0.00342014	-0.000386234	0.179457	0.529252		PALc	0.167354	-1.38587	-0.0087207	-0.00506625	0.128289	-0.233287
PALd	0.463514	-0.734505	-0.00673107	-0.00815533	0.245874	-0.739364		PALd	5.7929e-06	-4.66086	-0.0360759	-0.0332084	3.96356e-06	-0.52942		PALd	0.040949	2.05756	0.0141182	0.0141034	0.039537	0.97495
PALm	0.718688	-0.36073	-0.00283656	-0.00481766	0.323878	-0.602637		PALm	0.093835	-1.68364	-0.0112655	-0.0089235	0.0312783	0.216788		PALm	0.198369	-1.29056	-0.00743611	-0.00396127	0.142419	-0.199845
PALv	0.250952	1.15143	0.0103298	0.00924901	0.145288	-0.0494899		PALv	6.14652e-05	-4.09554	-0.0271533	-0.0250802	3.47412e-05	-0.387729		PALv	0.542604	-0.609941	-0.00479015	-0.000190255	0.33762	0.0389714
PB	0.00136853	3.2475	0.0252308	0.0245256	0.00192284	0.717255		PB	2.83036e-09	6.22597	0.0300691	0.0281055	3.67947e-09	2.19925		PB	0.93498	0.081685	0.000632097	0.00184374	0.52361	0.28165
PERI	0.662625	0.436952	0.00280651	0.00246351	0.315547	-0.310845		PERI	0.0216796	-2.31435	-0.0144608	-0.013332	0.00761717	0.0587081		PERI	0.935018	0.0816369	0.000471813	0.00068329	0.52361	0.281633
PIR	0.000337977	3.6483	0.0329543	0.0253512	0.000571962	0.863866		PIR	0.00305389	-2.99943	-0.0214542	-0.0202382	0.00124064	-0.113001		PIR	0.000330424	-3.6545	-0.0298382	-0.0219691	0.000660848	-1.02931
PL	0.0023909	3.07669	0.0271774	0.0127183	0.00292222	0.65477		PL	0.000140368	-3.88373	-0.0290185	-0.0342049	7.60329e-05	-0.334641		PL	0.000142272	-3.8802	-0.0356771	-0.0163581	0.000331967	-1.1085
PRNr	0.000547359	3.51408	0.0295802	0.0263109	0.000860136	0.81477		PRNr	0.263044	1.12243	0.00660598	0.00578526	0.0777177	0.920099		PRNr	7.29934e-05	-4.05214	-0.0347511	-0.0308135	0.000225547	-1.16883
PTLp	0.102348	-1.64122	-0.01503	-0.0137826	0.0703641	-1.07104		PTLp	8.40514e-22	-10.8495	-0.0666786	-0.0621737	5.46334e-21	-2.08054		PTLp	0.000796429	3.40691	0.0328284	0.0261247	0.00139375	1.44841
RHP	2.00741e-05	4.37013	0.0387761	0.0374155	6.30901e-05	1.12791		RHP	1.887e-05	4.38493	0.0260971	0.024935	1.11505e-05	1.73781		RHP	0.998895	-0.00138642	-1.37746e-05	0.000448835	0.548413	0.252502
RSP	0.721364	0.357147	0.00253647	0.00469336	0.323878	-0.340038		RSP	8.81348e-08	-5.55741	-0.04027	-0.0364989	9.54794e-08	-0.754129		RSP	0.00145197	3.22971	0.0313627	0.0266545	0.00225861	1.38623
SC	0.0168983	2.40941	0.0173792	0.017566	0.0135839	0.410681		SC	0.190092	1.31484	0.00865343	0.00944629	0.0602731	0.968324		SC	0.0149294	2.45566	0.0261317	0.0253255	0.0181749	1.11463
SN	0.00577614	2.79073	0.0202082	0.018449	0.005974	0.550166		SN	0.628383	0.484763	0.00287613	0.00326805	0.177587	0.760274		SN	8.05526e-05	-4.0271	-0.027934	-0.0269278	0.000225547	-1.16005
SS	0.548196	0.601504	0.0041994	0.00311541	0.268007	-0.250652		SS	3.90593e-24	-11.6281	-0.0845936	-0.0796179	5.0777e-23	-2.27568		SS	0.00293771	3.01177	0.025305	0.0222941	0.0041128	1.30976
STN	7.23425e-08	-5.5972	-0.038468	-0.0372543	5.30512e-07	-2.51814		STN	4.29e-10	-6.57404	-0.0320114	-0.0295884	6.97125e-10	-1.00894		STN	0.030642	-2.17736	-0.0128834	-0.0121891	0.0329991	-0.511008
TEa	0.114627	1.58475	0.0124129	0.0139446	0.0764177	0.109021		TEa	0.0339271	-2.13584	-0.0118167	-0.00990927	0.0116066	0.103449		TEa	0.135367	1.49941	0.0130008	0.00858971	0.108294	0.779105
TH	0.674123	-0.421125	-0.00333865	-0.0031853	0.315547	-0.62473		TH	0.655435	-0.446905	-0.00282811	-0.00165842	0.179457	0.526762		TH	0.0654334	1.85262	0.0128048	0.011412	0.0572542	0.903037
VIS	0.830555	-0.214274	-0.00182818	0.000698832	0.365444	-0.549064		VIS	3.84209e-07	-5.2543	-0.0337788	-0.0312693	3.56765e-07	-0.678159		VIS	0.0558125	1.92387	0.0200448	0.0141855	0.0504113	0.928038
VISC	0.518282	0.64716	0.00427246	0.00522659	0.265168	-0.233951		VISC	6.35782e-13	-7.70253	-0.0650403	-0.0611998	2.06629e-12	-1.29178		VISC	7.85908e-08	5.58053	0.0376005	0.0319988	1.10027e-06	2.21109
VTA	0.232858	-1.19671	-0.00987811	-0.0108719	0.142302	-0.908439		VTA	0.0103974	-2.58715	-0.0155886	-0.0145635	0.00386189	-0.00966691		VTA	0.0237949	-2.27808	-0.0140954	-0.0114001	0.0277607	-0.546348
ZI	4.01711e-05	-4.20148	-0.0318416	-0.0308176	0.000107744	-2.00758		ZI	0.000183316	-3.81338	-0.0195525	-0.0170289	9.221e-05	-0.317007		ZI	0.00231209	-3.08715	-0.0170241	-0.0157685	0.00340729	-0.830236
