# Supplementary material for: Dissociation of impulsive traits by subthalamic metabotropic glutamate receptor 4
Source: eLife. 2022 Jan 4;11:e62123. doi: 10.7554/eLife.62123 (PMC8803315; doi:10.7554/eLife.62123)
Supplement: Figure 2—figure supplement 2—source data 1. [file elife-62123-fig2-figsupp2-data1.xlsx]

## Sheet: Fig2 Fig suppl 2B
	Precue poke: down			Precue poke: up			Go poke: down			Go poke: up			FA poke: down			FA poke: down			Immobility: down			Immobility: up
Time	Mean	SD		Mean	SD		Mean	SD		Mean	SD		Mean	SD		Mean	SD		Mean	SD		Mean	SD
0	0.044868	0.051436		0.00987	0.013898		0.003953	0.011888		0.007024	0.012149		0.00826	0.012587		0.010713	0.013023		0.011568	0.012476		0.000983	0.01216
0.025	0.0749	0.063126		0.013715	0.013991		0.006624	0.01126		0.010994	0.012373		0.014827	0.012485		0.018784	0.012282		0.017262	0.011952		0.000484	0.011986
0.05	0.114572	0.062151		0.020476	0.014762		0.012437	0.011346		0.018522	0.013612		0.027916	0.012884		0.032845	0.012111		0.025412	0.012169		0.000134	0.012158
0.075	0.149441	0.062591		0.029429	0.014834		0.035956	0.015522		0.033925	0.014623		0.04763	0.013856		0.053664	0.011773		0.035798	0.012637		-0.001322	0.011989
0.1	0.136854	0.069298		0.033598	0.014009		0.095115	0.020207		0.056347	0.019393		0.070973	0.014713		0.073799	0.011171		0.041694	0.013125		-0.003219	0.011973
0.125	0.07712	0.051381		0.025249	0.013821		0.122415	0.014872		0.0605	0.021258		0.081285	0.013573		0.07987	0.010315		0.032786	0.014296		-0.006765	0.011343
0.15	0.021831	0.030084		0.00317	0.013515		0.064207	0.020089		0.029137	0.017161		0.049886	0.017882		0.05872	0.010619		0.005712	0.014209		-0.016074	0.010335
0.175	-0.023222	0.015575		-0.026818	0.009952		-0.012525	0.014322		-0.016489	0.012882		-0.015725	0.018467		0.003632	0.013274		-0.028963	0.010438		-0.033477	0.00741
0.2	-0.059762	0.011588		-0.052973	0.006342		-0.059909	0.011156		-0.050198	0.009036		-0.071755	0.013112		-0.071925	0.0134		-0.055144	0.006221		-0.051272	0.005467
0.225	-0.081237	0.01856		-0.058351	0.009473		-0.078888	0.011498		-0.063135	0.010981		-0.097391	0.01214		-0.123062	0.011878		-0.0577	0.010979		-0.054575	0.010057
0.25	-0.091115	0.022525		-0.05306	0.011221		-0.082007	0.011496		-0.063709	0.012155		-0.101883	0.012579		-0.130158	0.012653		-0.050154	0.013133		-0.050584	0.012945
0.275	-0.094481	0.02359		-0.044703	0.011374		-0.077696	0.011569		-0.05863	0.012148		-0.094565	0.012687		-0.112051	0.012189		-0.041422	0.013121		-0.048514	0.014009
0.3	-0.094405	0.02356		-0.03593	0.011627		-0.069965	0.011481		-0.050783	0.011935		-0.080132	0.012679		-0.088917	0.011763		-0.033006	0.012341		-0.045985	0.013058
0.325	-0.093819	0.023764		-0.027497	0.011925		-0.060602	0.011194		-0.041764	0.011764		-0.06249	0.012433		-0.067101	0.010974		-0.024853	0.011617		-0.031396	0.016447
0.35	-0.092127	0.02414		-0.019113	0.011544		-0.050229	0.011214		-0.032495	0.011719		-0.044359	0.012448		-0.046153	0.010734		-0.017299	0.011082		-0.001341	0.020599
0.375	-0.088114	0.024735		-0.011164	0.011736		-0.039552	0.01143		-0.02363	0.011743		-0.027626	0.012458		-0.027154	0.01101		-0.010753	0.011337		0.031024	0.018294
0.4	-0.082246	0.024468		-0.004211	0.012444		-0.029819	0.011249		-0.015643	0.011843		-0.013852	0.012408		-0.012138	0.011468		-0.005165	0.010978		0.054869	0.015004
0.425	-0.075296	0.02456		0.002399	0.01263		-0.021847	0.010816		-0.008776	0.011886		-0.003236	0.012114		0.000761	0.011278		-0.000557	0.011186		0.06905	0.014098
0.45	-0.067782	0.023567		0.008465	0.012541		-0.015389	0.010686		-0.003378	0.011862		0.005158	0.012126		0.010334	0.01075		0.003413	0.011004		0.075947	0.014059
0.475	-0.060059	0.021622		0.013041	0.012386		-0.01017	0.011054		0.001033	0.011852		0.011892	0.012254		0.016999	0.011231		0.00646	0.011388		0.076618	0.01359
0.5	-0.052699	0.019967		0.016788	0.012163		-0.006258	0.011491		0.004427	0.012001		0.017413	0.012156		0.022371	0.011604		0.008221	0.011458		0.07246	0.013101
0.525	-0.044806	0.019481		0.01905	0.012065		-0.002637	0.011403		0.007402	0.012193		0.022129	0.012288		0.027401	0.012229		0.009496	0.011386		0.064654	0.013425
0.55	-0.036361	0.019365		0.019505	0.012267		0.000877	0.011124		0.010108	0.012217		0.025844	0.012322		0.031059	0.011929		0.010764	0.011758		0.055278	0.013137
0.575	-0.028418	0.019427		0.019647	0.012697		0.004997	0.011145		0.012541	0.012181		0.028605	0.012382		0.033674	0.011512		0.011577	0.011608		0.046748	0.012861
0.6	-0.021407	0.019332		0.019308	0.013181		0.009624	0.011358		0.014948	0.012119		0.030342	0.012194		0.036581	0.011199		0.012283	0.011402		0.03769	0.01311
0.625	-0.015428	0.020066		0.018254	0.013424		0.014948	0.01131		0.01711	0.011933		0.031158	0.012156		0.037676	0.011128		0.012591	0.011556		0.028286	0.012879
0.65	-0.008957	0.020212		0.016566	0.012842		0.020562	0.011253		0.019019	0.011671		0.030765	0.012241		0.037745	0.011349		0.012791	0.011265		0.019121	0.012936
0.675	-0.002864	0.02021		0.014839	0.012988		0.025665	0.011043		0.020467	0.011571		0.029225	0.012349		0.03682	0.011616		0.01278	0.01179		0.011074	0.012602
0.7	0.00295	0.020387		0.012945	0.012778		0.029956	0.011325		0.021293	0.011578		0.027331	0.012366		0.034819	0.011476		0.01251	0.011571		0.003552	0.011935
0.725	0.007916	0.021006		0.011352	0.012832		0.033108	0.011307		0.021642	0.011582		0.025101	0.012254		0.031951	0.011366		0.012178	0.011498		-0.003392	0.012159
0.75	0.012041	0.021222		0.009392	0.013413		0.034659	0.01152		0.021351	0.011926		0.022757	0.012437		0.028665	0.011462		0.011327	0.011286		-0.009939	0.012249
0.775	0.015681	0.022417		0.007689	0.013723		0.03494	0.012219		0.020539	0.012482		0.0205	0.012693					0.00973	0.011723		-0.015306	0.012497

## Sheet: Fig2 Fig suppl 2C
NG sound with withhold onset (s)	Up			Down
-7	-0.199864	-0.180102	-0.327682	0.0794995	0.33581	0.12193	-0.0221782	-0.224834	-0.233777	-0.244906	-0.259951	-0.213429	-0.115974	0.754643	-0.166295	-0.391993	-0.160156
-6.75	-0.423707	-0.160225	-0.263379	-0.183404	0.314106	0.187415	-0.136713	-0.0755882	-0.233777	-0.244906	-0.228975	-0.213429	-0.248304	0.737117	-0.166295	-0.391993	-0.160156
-6.5	-0.438755	0.0151637	-0.108954	-0.309154	0.310101	0.264434	-0.297927	-0.0131096	-0.233777	-0.244906	-0.132524	-0.134415	-0.276609	0.406241	-0.166295	-0.391993	-0.160156
-6.25	-0.3176	0.192031	-0.0516439	-0.183404	0.2587	0.0751502	-0.431425	-0.0682871	-0.233777	-0.244906	-0.189346	0.0895073	-0.276609	0.157824	-0.166295	-0.314722	0.0542246
-6	-0.191414	0.13026	-0.164365	0.0794995	0.100586	-0.208871	-0.407973	-0.0704898	-0.233777	-0.244906	-0.290303	0.327372	-0.115974	0.109484	-0.166295	-0.173013	0.447385
-5.75	-0.133346	0.0239341	-0.305987	0.342386	0.0136588	-0.246011	-0.180348	0.0904979	-0.233777	-0.244906	-0.345373	0.327372	0.499888	0.164053	-0.166295	-0.0821081	0.699594
-5.5	-0.223658	-0.0858613	-0.356973	0.468136	-0.0282247	-0.251625	-0.0659323	0.336482	-0.100222	-0.153111	-0.351023	0.0895073	1.27805	0.18963	-0.01458	-0.173013	0.447385
-5.25	-0.34926	-0.291896	-0.280464	0.435136	-0.101931	-0.245749	-0.216896	0.35545	0.144712	0.0152357	-0.325712	-0.120492	1.7883	-0.05257	0.263657	-0.314722	0.0542246
-5	-0.300746	-0.515244	-0.175399	0.205232	-0.179349	-0.231933	-0.488996	0.077291	0.43539	0.30682	-0.295345	-0.199507	1.70494	-0.344102	0.442143	-0.378377	-0.122381
-4.75	-0.0520934	-0.561006	-0.219182	-0.0341683	-0.0967578	-0.185852	-0.652489	-0.266411	0.612238	0.53552	-0.320355	-0.213429	1.36138	-0.286755	0.263657	-0.391993	-0.160156
-4.5	0.190839	-0.522789	-0.337438	-0.23989	0.137606	-0.119844	-0.625985	-0.465956	0.687716	0.76675	-0.35638	-0.134415	0.690456	0.00429931	-0.01458	-0.391993	-0.160156
-4.25	0.277224	-0.370515	-0.372896	-0.321236	0.253219	-0.119126	-0.494749	-0.591611	0.525319	0.811837	-0.264993	0.0104928	0.0446601	0.164065	-0.139563	-0.314722	-0.160156
-4	0.216602	-0.00594562	-0.322958	-0.183404	0.131784	-0.260863	-0.461863	-0.616152	0.152105	0.674955	-0.112563	0.10345	-0.22	0.252215	-0.166295	-0.173013	-0.160156
-3.75	0.0758832	0.477469	-0.178385	0.0109312	0.17366	-0.336631	-0.542066	-0.548734	-0.121207	0.307727	-0.0571926	0.0104928	-0.276609	0.431818	-0.166295	-0.0821081	-0.160156
-3.5	-0.109506	0.822745	-0.00688147	0.0109312	0.446527	-0.150302	-0.421	-0.542018	-0.218089	-0.0613157	-0.0982667	-0.134415	-0.115974	0.511952	-0.166295	-0.173013	-0.160156
-3.25	-0.174267	0.982239	0.0802573	-0.195486	0.476256	0.0432985	-0.150795	-0.533963	-0.233777	-0.212557	-0.102172	-0.199507	0.178619	0.309574	-0.166295	-0.314722	-0.160156
-3	-0.228948	0.879982	0.0521195	-0.309154	0.199685	0.0371873	0.0732835	-0.485942	-0.233777	-0.244906	-0.0822105	-0.213429	0.367598	0.0123146	-0.166295	-0.301107	-0.160156
-2.75	-0.35781	0.584735	-0.0372968	-0.251972	0.164134	-0.214029	0.0885639	-0.448814	-0.189259	-0.244906	-0.0625498	-0.213429	0.339253	-0.101424	-0.166295	-0.173013	-0.160156
-2.5	-0.553392	0.196527	-0.137222	-0.114819	0.487234	-0.326176	0.0625145	-0.367552	-0.0185771	-0.153111	-0.0768534	-0.213429	0.339253	0.140788	-0.166295	-0.00483763	-0.160156
-2.25	-0.652284	-0.235879	-0.24889	-0.00116801	0.742668	-0.138656	0.0466355	-0.0898825	0.197086	0.0152357	-0.143238	-0.213429	0.556537	0.415273	-0.166295	0.0459662	-0.160156
-2	-0.634642	-0.663516	-0.361271	0.148068	0.485757	0.191278	-0.00931326	0.204881	0.24946	0.123229	-0.118235	-0.213429	0.794481	0.357926	-0.01458	-0.00483763	-0.160156
-1.75	-0.649402	-0.941916	-0.418702	0.217331	0.106936	0.288248	-0.0377641	0.174905	0.0630672	0.0152357	0.160983	-0.213429	1.30473	0.0839189	0.263657	-0.159398	-0.160156
-1.5	-0.805275	-0.878334	-0.3894	0.0794995	0.0451494	0.0862432	-0.107488	-0.105733	-0.136896	-0.153111	0.53046	-0.213429	1.76159	0.100464	0.442143	-0.237452	-0.160156
-1.25	-0.912419	-0.51071	-0.337314	-0.114836	0.366999	-0.093014	-0.142024	-0.305133	-0.218089	-0.136936	0.652222	-0.134415	1.7883	0.463601	0.263657	-0.0821275	0.0542246
-1	-0.820983	-0.0574415	-0.24169	-0.114836	0.601679	-0.0979342	-0.237762	-0.411223	-0.233777	0.0152357	0.394094	0.0104928	1.43865	0.754165	-0.01458	0.136871	0.447385
-0.75	-0.525021	0.189593	-0.120706	0.0230133	0.418725	0.131363	-0.412948	-0.499313	-0.189259	0.123229	0.00886125	0.10345	1.1724	0.631896	-0.139563	0.214142	0.699594
-0.5	-0.225894	0.208366	-0.101053	0.0109312	-0.00803697	0.301507	-0.595202	-0.499321	-0.107614	0.0152357	-0.207878	0.0104928	0.879435	0.422798	-0.01458	0.123237	0.447385
-0.25	-0.0284012	0.0968056	-0.159724	-0.126918	-0.251586	0.187057	-0.688871	-0.409338	-0.0552402	-0.153111	-0.309656	-0.134415	0.339253	0.343645	0.415372	0.00877775	0.0542246
0	0.0252151	0.0709277	-0.0987052	-0.183404	-0.267452	-0.0503874	-0.598247	-0.400949	-0.107614	-0.228732	-0.38674	-0.199507	-0.0876699	0.23797	0.872095	-0.159398	-0.122381
0.25	0.0129655	0.175171	0.212609	-0.171305	-0.19584	-0.256656	-0.440515	-0.555237	-0.189259	-0.244906	-0.290311	-0.213429	-0.248304	-0.0610998	0.872095	-0.314722	-0.160156
0.5	-0.00862231	0.156144	0.620839	-0.264054	-0.0964336	-0.398569	-0.434738	-0.687172	-0.225933	-0.244906	0.0288375	-0.213429	-0.276609	-0.375395	0.415372	-0.378377	-0.160156
0.75	-0.108767	0.0329772	0.717821	-0.389804	-0.0447162	-0.483702	-0.669454	-0.638714	-0.233777	-0.244906	0.358392	-0.213429	-0.115974	-0.375407	0.0121529	-0.391993	-0.160156
1	-0.279734	-0.146413	0.44933	-0.446291	-0.0909286	-0.501792	-0.93207	-0.528807	-0.233777	-0.244906	0.408713	-0.134415	0.178619	-0.0212779	-0.139563	-0.391993	-0.160156
1.25	-0.380076	-0.270793	0.069192	-0.389804	-0.221549	-0.471534	-0.912044	-0.343473	-0.233777	-0.244906	0.180952	0.0895073	0.367598	0.278294	-0.166295	-0.314722	-0.160156
1.5	-0.440326	-0.296164	-0.218033	-0.264054	-0.309961	-0.298835	-0.658697	-0.142689	-0.233777	-0.244906	-0.0968296	0.485401	0.178619	0.067386	-0.166295	-0.173013	-0.160156
1.75	-0.486898	-0.253939	-0.319772	-0.183387	-0.298959	-0.0534996	-0.429912	0.0323953	-0.233777	-0.244906	-0.284653	0.775216	-0.115974	-0.199084	-0.166295	-0.00483763	-0.160156
2	-0.456197	-0.228055	-0.24588	-0.195486	-0.258243	0.0773915	-0.388543	0.05075	-0.233777	-0.244906	-0.340324	0.960309	-0.248304	0.140764	-0.166295	0.123237	-0.160156
2.25	-0.385243	-0.253939	-0.000670864	-0.126918	-0.159145	0.0528541	-0.552491	-0.0656476	-0.233777	-0.244906	-0.234633	1.31518	-0.276609	0.802994	-0.166295	0.291412	-0.160156
2.5	-0.252299	-0.330819	0.117372	0.0230133	0.0231764	-0.0315847	-0.639177	-0.157356	-0.233777	-0.244906	0.114567	1.96288	-0.276609	0.97129	-0.166295	0.369466	-0.160156
2.75	-0.131059	-0.445909	-0.048044	0.0109312	0.231206	-0.0349017	-0.53886	-0.134633	-0.189259	-0.244906	0.505457	2.35957	-0.276609	0.671216	-0.166295	0.291412	-0.160156
3	-0.0619223	-0.630068	-0.300125	-0.195486	0.268225	0.0782766	-0.273234	0.0594065	-0.107614	-0.244906	0.566185	2.0009	-0.276609	0.730361	-0.166295	0.214123	-0.160156
3.25	-0.0852414	-0.724315	-0.381508	-0.377722	0.0910768	0.260017	-0.129444	0.233016	-0.0552402	-0.244906	0.291992	1.226	-0.276609	1.094	-0.166295	0.227757	-0.160156
3.5	-0.100788	-0.660214	-0.281329	-0.446291	-0.0707487	0.485275	-0.0340411	0.354803	-0.107614	-0.244906	0.0802875	0.922222	-0.276609	1.1817	-0.166295	0.150487	-0.160156
3.75	-0.0914767	-0.523036	-0.174537	-0.458373	0.0136588	0.683782	0.0979908	0.352642	-0.189259	-0.244906	0.0859525	1.47401	-0.276609	0.768875	-0.166295	-0.0957429	-0.160156
4	-0.108161	-0.468238	-0.0582288	-0.458373	0.211003	0.611902	0.182534	0.130748	-0.225933	-0.244906	0.241672	2.16353	-0.276609	0.311372	-0.166295	-0.223837	-0.160156
4.25	-0.0805649	-0.310229	0.0622951	-0.458373	0.314122	0.222417	0.0843555	-0.300138	-0.233777	-0.244906	0.439065	1.76386	-0.276609	-0.0753688	-0.166295	-0.159398	-0.160156
4.5	-0.061991	-0.00568578	0.101072	-0.458373	0.341299	-0.14719	-0.129167	-0.472957	-0.233777	-0.244906	0.521206	0.708502	-0.276609	-0.335573	-0.166295	-0.0821081	-0.160156
4.75	-0.153164	0.199595	0.0541434	-0.458373	0.325108	-0.222382	-0.280797	-0.141946	-0.233777	-0.244906	0.328017	0.0281359	-0.276609	-0.383434	-0.166295	-0.173013	-0.160156
5	-0.365109	0.134775	-0.011192	-0.458373	0.372497	-0.0846615	-0.281741	0.340048	-0.189259	-0.244906	0.00886887	-0.185584	-0.276609	-0.190052	-0.166295	-0.314722	-0.160156
5.25	-0.523438	-0.00169033	-0.0245073	-0.458373	0.393325	0.0683398	-0.0828027	0.522824	-0.107614	-0.244906	-0.147158	-0.213429	-0.276609	0.115713	-0.166295	-0.223837	-0.160156
5.5	-0.56868	-0.00473266	-0.0499625	-0.458373	0.398197	0.190365	0.166336	0.589435	-0.0552402	-0.244906	-0.0268481	-0.213429	-0.276609	0.406265	-0.166295	0.0459662	-0.160156
5.75	-0.593835	0.16917	-0.0395682	-0.458373	0.419017	0.357515	0.187687	0.777229	-0.107614	-0.244906	0.393786	-0.213429	-0.276609	0.415273	-0.166295	0.305047	-0.160156
6	-0.589483	0.468685	-0.0126381	-0.458373	0.466414	0.435701	0.0155295	0.849104	-0.189259	-0.244906	0.733211	-0.213429	-0.276609	0.18061	-0.166295	0.264946	0.0542246
6.25	-0.535247	0.862621	-0.0479264	-0.389804	0.45572	0.319923	-0.163834	0.807858	-0.225933	-0.244906	0.753701	-0.213429	-0.276609	0.0355672	-0.166295	0.0724328	0.447385
6.5	-0.487821	1.09662	-0.118682	-0.264054	0.449907	0.153459	-0.201874	0.601399	-0.233777	-0.244906	0.585807	-0.213429	-0.276609	0.0611565	-0.166295	-0.145783	0.913974
6.75	-0.508053	0.97921	-0.224939	-0.183387	0.466722	0.165823	-0.104771	0.414105	-0.233777	-0.244906	0.561949	-0.213429	-0.276609	-0.10091	-0.166295	-0.314722	1.05493
7	-0.512671	0.482218	-0.367015	-0.264054	0.460909	0.374085	0.138883	0.437282	-0.233777	-0.244906	0.592925	-0.134415	-0.276609	-0.449299	-0.01458	-0.378377	0.913974
7.25	-0.424795	0.0495457	-0.505965	-0.389804	0.41352	0.497829	0.365262	0.680329	-0.233777	-0.244906	0.555155	0.168522	-0.276609	-0.415719	0.263657	-0.314722	0.69954
7.5	-0.296526	-0.0201074	-0.51457	-0.377722	0.289906	0.498347	0.392225	0.7824	-0.233777	-0.244906	0.61227	0.630308	-0.276609	0.172571	0.442143	-0.173013	0.661765
7.75	-0.208453	0.010902	-0.428043	-0.264054	0.0341707	0.473991	0.311466	0.378	-0.233777	-0.244906	0.850422	0.868173	-0.276609	0.882638	0.263657	-0.0821081	0.737368
8	-0.154761	0.066419	-0.394282	-0.183387	-0.102263	0.454303	0.244621	-0.191412	-0.233777	-0.244906	1.18387	0.630308	-0.276609	1.09975	-0.01458	-0.0957429	0.447385
8.25	-0.235066	0.114885	-0.30943	-0.264054	0.0139752	0.464953	0.254685	-0.534954	-0.233777	-0.244906	1.40773	0.182444	-0.276609	0.737105	-0.139563	-0.0957429	0.0542246
8.5	-0.370584	0.0877817	-0.0983216	-0.389804	0.0602033	0.360309	0.0219627	-0.570333	-0.233777	-0.244906	1.23061	0.130474	-0.276609	0.31136	-0.166295	0.0860482	-0.122381
8.75	-0.439318	0.105589	-0.029009	-0.446291	-0.0505375	0.291688	-0.366923	-0.440437	-0.233777	-0.244906	0.759027	0.551274	-0.276609	0.181076	-0.166295	0.419487	-0.160156
9	-0.347745	0.25534	-0.162582	-0.458373	-0.127639	0.313657	-0.573085	-0.367976	-0.233777	-0.153111	0.32409	1.11916	-0.276609	0.400036	-0.166295	0.743006	-0.160156
9.25	-0.246236	0.443061	-0.19863	-0.458373	-0.162842	0.41723	-0.494145	-0.258493	-0.233777	0.0152357	0.0409813	1.22306	-0.276609	0.543735	-0.166295	0.756622	-0.160156
9.5	-0.278297	0.507868	0.0244388	-0.458373	-0.232551	0.42021	-0.312184	-0.0103333	-0.233777	0.123229	-0.168256	0.881294	-0.276609	0.454605	-0.166295	0.419487	-0.160156
9.75	-0.410608	0.626681	0.216714	-0.389804	-0.227046	0.316416	-0.0858431	0.328106	-0.233777	0.0152357	-0.204273	0.355197	-0.276609	0.343154	-0.166295	0.0996636	-0.160156
10	-0.560611	0.908902	0.218956	-0.264054	-0.194039	0.100763	0.141315	0.487974	-0.233777	-0.153111	-0.0411441	0.27458	-0.276609	0.357902	-0.166295	-0.0685121	-0.160156
10.25	-0.579098	1.0699	0.0888508	-0.183387	-0.238048	-0.244478	0.272376	0.27497	-0.233777	-0.228732	0.084523	0.868133	-0.276609	0.392008	-0.01458	-0.0957429	-0.160156
10.5	-0.304257	0.600883	-0.0250912	-0.264054	-0.16465	-0.652385	0.25889	-0.0173664	-0.100222	-0.244906	0.0592049	1.65996	-0.276609	0.0844213	0.263657	-0.0684927	-0.160156
10.75	0.286108	-0.0100338	-0.146569	-0.389804	0.107576	-0.800414	0.163275	-0.233639	0.144712	-0.153111	-0.0518507	1.92189	-0.276609	-0.440782	0.442143	-0.173013	-0.160156
11	0.756385	-0.285674	-0.343188	-0.309154	0.334633	-0.477273	0.0820813	-0.440437	0.301834	0.0152357	-0.137888	1.7901	-0.276609	-0.592532	0.263657	-0.314722	-0.160156
11.25	0.691904	-0.291896	-0.420526	-0.00116801	0.455419	-0.0851559	0.070542	-0.652526	0.18923	0.30682	-0.198608	1.52974	-0.276609	-0.3033	-0.01458	-0.378377	-0.160156
11.5	0.209365	-0.181328	-0.267556	0.285917	0.393325	-0.0381904	0.146914	-0.621155	0.248535	0.719111	-0.229276	1.13306	-0.276609	0.092473	-0.139563	-0.391993	-0.160156
11.75	-0.245381	0.0875219	0.00735714	0.273818	0.273082	-0.218627	0.188461	-0.21886	0.688145	1.19524	-0.178955	0.644211	-0.276609	0.147508	-0.166295	-0.237452	-0.160156
12	-0.433657	0.400849	0.128873	0.0674003	0.278888	-0.175021	0.0158654	0.217185	1.34903	1.74694	-0.0214833	0.289324	-0.276609	-0.0615779	-0.166295	0.123237	-0.160156
12.25	-0.372335	0.447589	0.0217165	-0.0906546	0.398513	-0.0433721	-0.246134	0.283367	1.68177	2.31141	0.150592	0.196367	-0.276609	-0.318047	-0.166295	0.446756	-0.160156
12.5	-0.182274	0.241788	-0.230819	-0.183404	0.518123	-0.0645216	-0.338704	0.0344175	1.49875	2.59214	0.23128	0.313429	-0.276609	-0.537461	-0.166295	0.355851	-0.160156
12.75	0.122145	0.212595	-0.420399	-0.126918	0.50194	-0.206691	-0.183239	-0.191845	0.822142	2.00802	0.161299	0.829324	-0.115974	-0.512386	-0.166295	-0.0184724	-0.160156
13	0.44379	0.384248	-0.407489	0.0915815	0.352301	-0.379771	0.0322299	-0.302172	0.219705	1.10247	-0.0214909	1.51205	0.178619	-0.263478	-0.166295	-0.287492	-0.160156
13.25	0.646029	0.486505	-0.233668	0.205249	0.117078	-0.487019	0.13827	-0.446623	-0.000329595	0.647836	-0.143246	1.97684	0.367598	0.180622	-0.01458	-0.378377	-0.160156
13.5	0.402382	0.378247	-0.0355909	0.0794995	0.0338544	-0.419971	0.144031	-0.491258	-0.107614	0.415721	0.0246172	1.72581	0.178619	0.438538	0.263657	-0.391993	-0.160156
13.75	-0.033991	0.371136	-0.0169303	-0.183404	0.133585	-0.239647	0.204482	-0.29826	-0.189259	0.198826	0.342629	1.07733	-0.115974	0.277804	0.442143	-0.160181	-0.160156
14	-0.145008	0.508109	-0.186873	-0.377722	0.137613	0.01176	0.269812	-0.0576918	-0.181414	0.123206	0.667663	0.726986	-0.248304	-0.101424	0.263657	0.264946	-0.160156
14.25	0.126606	0.622705	-0.305994	-0.446291	-0.0597309	0.135061	0.22679	0.0379797	-0.107614	0.139404	0.818925	0.644211	-0.276609	-0.295273	0.137136	0.537661	-0.160156
14.5	0.450976	0.482497	-0.307897	-0.458373	-0.341166	-0.0201105	-0.0361108	0.0440782	0.0783157	0.0152357	0.809371	0.709323	-0.276609	-0.300988	0.290389	0.264946	-0.160156
14.75	0.50605	0.182462	-0.251745	-0.458373	-0.481288	-0.203765	-0.352336	0.14176	0.359912	-0.0613157	0.562565	0.751111	-0.276609	-0.457327	0.442143	-0.160181	-0.160156
15	0.383461	0.00307179	-0.200521	-0.458373	-0.455271	-0.273041	-0.570194	0.00971801	0.598679	0.123206	0.125266	0.616366	-0.276609	-0.63463	0.263657	-0.351147	-0.160156

## Sheet: Fig2 Fig suppl 2D
Movement onset (sec)	Up							Down
-7	0.157785	0.138952	-0.103112	0.205413	-0.0573154	-0.0162751	-0.008797	0.0542622	0.0100839	-0.105381	0.113524	0.169308	-0.132718	0.0986194	-0.0324464	0.0635482	-0.0354817	-0.00827924	-0.106084	0.224953	0.389071	0.120772	-0.038885	0.0586373	-0.0286744	0.128639	0.203341	0.253111	0.785981	-0.0489004	0.33047	0.134373	0.0138815	-0.031835
-6.75	0.077917	0.0952319	-0.0874428	0.117292	-0.0146086	-0.0252303	0.033903	0.126748	-0.0130064	-0.0670653	0.109248	0.236497	-0.22992	0.00600014	-0.0617493	0.0593326	-0.155784	0.0167081	-0.0137224	0.103819	0.376029	0.12146	0.00339846	0.0313116	-0.0856642	0.112043	0.253062	0.0339905	0.518795	-0.0544028	0.500651	0.115717	0.0471363	-0.0694781
-6.5	0.0342967	0.0362287	0.0229938	0.0319523	-0.0561578	-0.025009	0.093644	0.14176	0.0477963	-0.051908	0.0673945	0.260659	-0.255627	0.0156585	-0.0454556	0.0101766	-0.241662	0.0276058	0.146521	-0.0375176	0.190153	0.0110068	0.0866287	0.00286899	-0.118717	0.0820441	0.22629	-0.154609	0.186086	-0.100868	0.455224	0.105188	0.0521171	-0.128159
-6.25	0.0725059	0.0133963	0.204663	-0.0886151	-0.123881	-0.0553879	0.108139	0.0970014	0.154654	-0.0810999	0.0262353	0.194999	-0.208016	0.0431147	-0.0742107	-0.100039	-0.276802	-0.0153498	0.15468	-0.103493	0.0423392	-0.113367	0.108523	-0.0760676	-0.0775344	0.0654479	0.165071	-0.262072	0.153823	-0.154768	0.307558	0.124129	0.0138815	-0.154518
-6	0.16814	0.0439258	0.31095	-0.184846	-0.162561	-0.0948953	0.0194155	0.0104031	0.189692	-0.137769	0.0147003	0.0707121	-0.117524	0.0490808	-0.111159	-0.155149	-0.150683	-0.0411121	-0.0358233	-0.0210449	-0.00761088	-0.143696	0.0143471	-0.197021	-0.0313844	0.0544283	0.0773139	-0.261492	0.327789	-0.202157	0.234511	0.190708	0.000277316	-0.0961617
-5.75	0.232112	0.124252	0.278991	-0.197425	-0.173799	-0.0882387	-0.0879467	-0.0396086	0.139301	-0.210313	0.0112267	-0.0327388	-0.0585417	0.0307096	-0.117344	-0.138565	-0.0309835	-0.0837618	-0.203199	0.172327	0.0414005	-0.0702733	-0.0773326	-0.274276	-0.0494815	0.0503932	-0.0378957	-0.186604	0.427441	-0.276405	0.22802	0.235702	0.0188623	0.0211996
-5.5	0.231486	0.237397	0.201137	-0.127981	-0.189504	-0.0736206	-0.133963	0.000830163	0.0783442	-0.228668	0.00176962	-0.066445	-0.0748907	-0.0385234	-0.148936	-0.0938825	-0.0968689	-0.288597	-0.2878	0.316951	0.144449	0.0465296	-0.0862933	-0.257714	-0.0523513	0.119245	-0.102937	-0.108591	0.31022	-0.341009	0.186812	0.187171	0.0754033	0.0964858
-5.25	0.178514	0.328892	0.118568	-0.0155169	-0.236718	-0.119046	-0.115876	0.0645096	0.0658273	-0.18836	0.0130508	-0.0222647	-0.132474	-0.128549	-0.15486	-0.0294065	-0.182318	-0.437465	-0.250285	0.344464	0.193657	0.116415	-0.0841634	-0.17577	0.0176162	0.221303	-0.064894	-0.0659059	0.145057	-0.378315	0.127145	0.068759	0.103957	0.0531966
-5	0.084899	0.331605	0.0504223	0.0798132	-0.308158	-0.189784	-0.0646555	0.115755	0.0685092	-0.110329	0.0576272	0.0516696	-0.087838	-0.134232	-0.0702694	0.0901876	-0.0961958	-0.281196	-0.0653579	0.357069	0.160785	0.0919967	-0.172833	-0.0372421	0.104633	0.320045	0.0311893	-0.0597782	-0.00441466	-0.319605	0.0903934	-0.00755744	0.0471363	0.0585102
-4.75	0.0108805	0.252797	0.0893393	0.0834642	-0.34809	-0.227655	-0.031798	0.171668	0.0121929	-0.0468668	0.0887869	0.0374627	0.0218721	-0.0547985	0.116353	0.222401	0.106879	0.101273	0.2304	0.37141	0.0847547	0.0657441	-0.323225	0.124942	0.152906	0.388057	0.042234	-0.0715623	-0.113338	-0.122536	0.0988164	-0.0346239	-0.0612444	0.224791
-4.5	0.0164422	0.164396	0.166691	0.0353743	-0.32529	-0.18651	-0.0367263	0.233819	-0.0812666	-0.0312493	0.0815412	-0.0235389	0.0703968	0.0430096	0.281938	0.291241	0.177798	0.38151	0.485189	0.329126	0.00872957	0.0690964	-0.413347	0.210593	0.1844	0.439003	-0.0419394	-0.0995557	-0.154379	0.135187	0.106434	-0.0682237	-0.0282834	0.368519
-4.25	0.0473468	0.127605	0.172693	0.0166147	-0.273674	-0.0885012	-0.0367263	0.26213	-0.18782	-0.0602371	0.0758236	-0.0144461	0.0381658	0.0751318	0.330907	0.229308	0.0687937	0.384643	0.613877	0.252053	-0.0672955	0.0227994	-0.40075	0.196298	0.179129	0.387271	-0.102937	-0.124875	-0.163157	0.305096	0.117026	-0.0329183	0.207343	0.309838
-4	0.0425088	0.144224	0.0504339	0.0381279	-0.234821	0.00854897	-0.0268767	0.254965	-0.248923	-0.139434	0.0925669	0.030752	-0.0359206	0.0727355	0.299369	0.106249	-0.0231926	0.198873	0.613595	0.2068	-0.110655	0.0418686	-0.339901	0.153898	0.145504	0.284041	-0.0189963	-0.152654	-0.163157	0.273904	0.141727	0.0891816	0.495595	0.0908317
-3.75	0.0416478	0.183207	-0.0746324	0.0431201	-0.181432	0.0638136	-0.0646555	0.239315	-0.23357	-0.171475	0.125327	0.0467726	-0.126416	0.0848235	0.301089	0.0385946	0.0778288	0.0412784	0.565564	0.206879	-0.0148001	0.154595	-0.276071	0.0870663	0.0973834	0.270271	0.184209	-0.173905	-0.113338	0.179222	0.212851	0.204146	0.532765	-0.0848856
-3.5	0.0553195	0.229788	-0.147983	-0.0253453	-0.117323	0.065279	-0.115876	0.202054	-0.162775	-0.108448	0.14117	0.00830806	-0.186122	0.176374	0.370672	0.0815114	0.311586	0.104742	0.54463	0.153574	0.177321	0.228706	-0.195364	-0.0548715	0.0429514	0.268428	0.291337	-0.155657	-0.0219716	0.0714547	0.375769	0.199355	0.325405	-0.0848856
-3.25	-0.017467	0.271727	-0.189663	-0.115117	-0.104478	0.0841595	-0.0830255	0.139218	-0.0766299	0.00668625	0.128013	-0.0407629	-0.131938	0.287941	0.406075	0.126856	0.368754	0.295107	0.516065	0.11352	0.296509	0.187447	-0.120484	-0.195337	0.0121924	0.176556	0.203114	-0.0906056	0.0864588	-0.0658548	0.490056	0.0841615	0.0620715	0.0211996
-3	-0.137125	0.286428	-0.224818	-0.152094	-0.152092	0.134788	0.0144942	0.103299	-0.0156769	0.150304	0.101088	-0.0789656	-0.0173342	0.31968	0.332178	0.131538	0.227907	0.316885	0.346293	0.147435	0.266183	0.182934	-0.075201	-0.199212	-0.00787505	0.0562765	0.0271341	-0.00275964	0.119214	-0.113511	0.488229	0.00969361	-0.108103	0.0964858
-2.75	-0.208662	0.25921	-0.249738	-0.0846761	-0.197983	0.182967	0.108139	0.151339	0.00219998	0.287927	0.0725327	-0.0807056	0.0789587	0.266219	0.192804	0.115962	0.0952712	0.15749	0.130828	0.178946	0.184108	0.219574	-0.0359853	-0.069928	-0.0368158	-0.0140125	-0.0948439	0.0484353	0.0864588	0.00777438	0.406386	0.0767163	-0.164637	0.0211996
-2.5	-0.220065	0.194216	-0.269173	-0.0064356	-0.201813	0.139897	0.093644	0.191379	0.0147169	0.37446	0.104001	-0.0142834	0.169941	0.243013	0.165252	0.125694	0.253193	0.0899065	0.137529	0.158599	0.0754123	0.140142	0.0367384	0.0873729	-0.00334301	-0.00537352	-0.125886	0.0182319	-0.0131931	0.203186	0.344681	0.173457	-0.146332	-0.0961617
-2.25	-0.236891	0.112884	-0.349322	-0.0128364	-0.175057	0.0177668	0.0240605	0.158719	0.0631492	0.347836	0.126907	0.0515665	0.230228	0.315968	0.226377	0.195108	0.584941	0.141378	0.360682	0.107296	-0.0742886	-0.0297094	0.0902869	0.145322	0.079294	0.085859	-0.0459888	-0.0453267	-0.063518	0.29148	0.416971	0.18867	-0.0944921	-0.14888
-2	-0.306433	0.0222687	-0.463306	-0.110048	-0.168939	-0.0828688	-0.054813	0.114542	0.124102	0.238096	0.123395	0.110375	0.235415	0.421629	0.245914	0.305235	0.852307	0.246954	0.503784	0.0621805	-0.163356	-0.0914849	0.0503423	0.13382	0.112035	0.171315	0.165071	-0.0985503	-0.0131931	0.246119	0.561759	0.223364	-0.0329704	-0.128159
-1.75	-0.4124	-0.0706246	-0.572481	-0.211707	-0.207132	-0.116003	-0.115876	0.109225	0.146616	0.171399	0.13347	0.166592	0.170576	0.466217	0.114229	0.37629	0.917103	0.343774	0.35186	0.0546679	-0.166649	0.0495844	0.0213789	0.0845108	0.0865398	0.221078	0.42117	-0.133871	0.0864588	0.121134	0.699852	0.28752	-0.0143854	-0.0694781
-1.5	-0.522528	-0.156335	-0.677233	-0.225187	-0.298037	-0.12465	-0.138884	0.142564	0.139301	0.224946	0.180939	0.222285	0.133092	0.44547	-0.0473326	0.322957	0.843933	0.420435	0.0894144	0.0353208	-0.130479	0.228166	0.0644646	0.0166725	0.0483752	0.267783	0.605238	-0.170689	0.169034	-0.0137615	0.785545	0.333535	-0.00470344	-0.031835
-1.25	-0.609825	-0.232044	-0.76621	-0.20262	-0.374067	-0.158909	-0.143805	0.179501	0.1089	0.320789	0.283521	0.195897	0.166419	0.403363	-0.124982	0.231148	0.734046	0.457639	-0.0219613	-0.0487974	-0.0976121	0.238121	0.113654	-0.00494848	0.0121924	0.386933	0.613325	-0.2031	0.227645	-0.063569	0.853047	0.292468	0.0188623	-0.0694781
-1	-0.632869	-0.288189	-0.793204	-0.191529	-0.387082	-0.175854	-0.143805	0.160099	0.0935467	0.342359	0.386681	0.120977	0.18865	0.340081	-0.129637	0.166789	0.612808	0.467448	0.0224521	-0.149446	-0.0147951	0.0253217	0.0647464	0.0327015	-0.0286783	0.48672	0.452206	-0.188023	0.236423	-0.0741328	0.87097	0.18834	0.0754033	-0.0961617
-0.75	-0.595195	-0.306976	-0.751715	-0.182527	-0.342902	-0.168636	-0.143805	0.096857	0.124098	0.267518	0.393176	0.0480326	0.158105	0.21925	-0.152451	0.116884	0.508036	0.454168	0.0241142	-0.208644	0.0779676	-0.191983	-0.0157518	0.0117163	-0.0903561	0.522802	0.356982	-0.143826	0.169034	-0.143934	0.697338	0.0914681	0.103957	-0.031843
-0.5	-0.492677	-0.285697	-0.640463	-0.126719	-0.278272	-0.148122	-0.143805	0.0827448	0.167175	0.150512	0.263992	0.00439179	0.0545696	0.132066	-0.184641	0.0500584	0.438557	0.449146	-0.107286	-0.228986	0.0847646	-0.224835	-0.0434516	-0.06834	-0.123985	0.414465	0.410346	-0.135406	0.0952373	-0.263417	0.461929	0.0668285	0.0754033	0.0588427
-0.25	-0.355911	-0.22543	-0.436243	-0.0293613	-0.199232	-0.125911	-0.143805	0.11704	0.167175	0.0857663	0.0976292	-0.0362026	-0.0446497	0.141406	-0.184825	0.0238484	0.323217	0.43458	-0.1936	-0.258826	-0.018093	-0.141848	-0.0629796	-0.118619	-0.0595971	0.26809	0.487303	-0.201682	-0.0131931	-0.299747	0.253427	0.0352165	0.0188623	0.0588427
0	-0.203054	-0.143116	-0.125301	0.0721463	-0.0772943	-0.0908982	-0.143805	0.0901049	0.0910228	0.0673575	0.0123702	-0.0736009	-0.0675233	0.192237	-0.209106	0.0424996	0.112296	0.399262	-0.190912	-0.266497	-0.110655	-0.0751693	-0.142423	-0.140284	0.0250218	0.120108	0.38336	-0.272909	-0.113338	-0.21132	0.108936	-0.0430096	-0.0279896	-0.037481
0.25	-0.0391079	-0.0595352	0.166407	0.136671	0.0469019	-0.0435396	-0.115876	-0.0239754	-0.0203174	0.0446658	0.0129694	-0.0624779	-0.0240427	0.199315	-0.289515	0.0487393	-0.0677412	0.337435	-0.147589	-0.175159	-0.139827	-0.0751729	-0.253686	-0.145307	0.0122002	0.00760717	0.161022	-0.295137	-0.154379	-0.0595959	0.0924314	-0.136588	-0.0895114	-0.122521
0.5	0.107348	0.0217211	0.317782	0.149253	0.0535352	0.00565651	0.0470615	-0.132404	-0.129549	-0.0509217	0.00738929	0.00571268	-0.0251445	0.116883	-0.378501	0.00617643	-0.205735	0.182134	-0.157803	-0.0217756	-0.173637	-0.113218	-0.309735	-0.123192	-0.111159	0.00443474	0.0241767	-0.278945	-0.113338	-0.00507529	0.16644	-0.163354	-0.118065	-0.154518
0.75	0.224508	0.106091	0.334531	0.110609	-0.0513342	0.052731	0.31273	-0.156583	-0.170093	-0.176998	-0.0220925	0.0858556	-0.0974508	-0.00927372	-0.409325	-0.0575602	-0.249353	-0.0257954	-0.217451	0.101936	-0.210003	-0.151263	-0.293346	-0.0598929	-0.162305	0.108118	0.0730318	-0.254994	-0.0219716	-0.0880057	0.162233	-0.0956517	-0.0895114	-0.160156
1	0.260097	0.181989	0.29603	-0.0114297	-0.157714	0.115024	0.490453	-0.0993252	-0.147426	-0.20904	-0.0799413	0.0935579	-0.15642	-0.0849135	-0.353896	-0.0835064	-0.215467	-0.134601	-0.248208	0.141106	-0.226339	-0.184941	-0.215065	0.0124853	-0.0621549	0.208213	0.249245	-0.246577	0.0864588	-0.167765	0.0366481	-0.0274547	-0.0612373	-0.0961617
1.25	0.219616	0.211538	0.285224	-0.166986	-0.194202	0.191603	0.419809	-0.00729312	-0.0562253	-0.173286	-0.0824367	0.0572406	-0.138372	-0.043286	-0.194278	-0.044305	-0.115146	-0.0428414	-0.162557	0.148835	-0.210003	-0.194353	-0.107063	0.0386592	0.0892575	0.195541	0.345328	-0.263243	0.119214	-0.1479	-0.085937	-0.061951	-0.0944921	0.0531966
1.5	0.132504	0.192845	0.282182	-0.260619	-0.195979	0.278726	0.24314	0.0926935	0.0400665	-0.146827	0.00541455	0.0145787	-0.0941672	0.0286109	-0.0310876	-0.0130533	-0.0765579	0.0698672	-0.0501667	0.0987969	-0.153808	-0.184941	-0.0490395	0.0437153	0.14024	0.0505033	0.218203	-0.265453	0.0864588	-0.0855848	-0.143183	-0.0958805	-0.146332	0.187164
1.75	0.0687719	0.184162	0.295284	-0.237154	-0.193135	0.30682	0.094966	0.153228	0.0783556	-0.135748	0.116003	0.00743266	-0.0108675	0.0492402	0.040617	-0.0289731	-0.0359397	0.0845587	-0.0507022	0.0229362	-0.0742836	-0.156308	-0.0429939	0.0592694	0.0838299	-0.0312567	0.0120457	-0.246533	-0.0131931	-0.0183332	-0.16414	-0.0160441	-0.169618	0.181517
2	0.0598051	0.212449	0.322895	-0.0922642	-0.210865	0.274223	-0.00387574	0.118234	0.014871	-0.100973	0.159461	0.0318405	0.072833	-0.00672713	0.0490832	-0.0114479	0.0422913	0.0644973	-0.101212	-0.0177735	-0.018088	-0.141848	-0.0622489	0.0809416	-0.0232584	0.0341273	-0.0948497	-0.244412	-0.113338	0.0186115	-0.141723	0.0787325	-0.118065	0.0851937
2.25	0.0920271	0.228344	0.327743	0.00221133	-0.212495	0.232488	-0.031805	0.0145583	-0.0410303	-0.0464366	0.134299	0.0213143	0.0723716	-0.101556	0.0718163	0.00706843	0.0533939	0.0474354	-0.0825387	-0.0529781	-0.018088	-0.156308	-0.124828	0.051159	-0.121275	0.14359	-0.0878428	-0.270697	-0.0547396	0.0207721	-0.0923065	0.196678	-0.0143854	0.0754323
2.5	0.0862051	0.222698	0.27682	0.0276361	-0.155627	0.202296	-0.0268767	-0.0939441	0.0227511	0.0268796	0.0849252	-0.0569543	0.0149985	-0.13363	0.12438	-0.0359246	0.011233	0.033094	-0.0784713	-0.0623854	-0.0509601	-0.127682	-0.161092	0.0181248	-0.136654	0.148524	-0.0108974	-0.273702	0.119214	0.0620315	-0.0677212	0.30819	0.0521242	0.117515
2.75	0.0271616	0.220627	0.185858	0.030248	-0.0943277	0.139663	-0.0646555	-0.132384	0.1189	0.0924291	0.0379429	-0.129216	-0.0475163	-0.0855592	0.104331	-0.116401	-0.0424977	-0.010963	-0.0785651	-0.0427798	-0.0544591	-0.032083	-0.118386	0.0356998	-0.0415038	0.08771	0.0611334	-0.230877	0.236436	0.142051	-0.0966411	0.33301	-0.0143854	0.128483
3	0.00597812	0.199598	0.123847	0.0559113	-0.10561	0.115461	-0.0879467	-0.110027	0.108907	0.127274	-0.0105028	-0.13006	-0.0647625	0.00820238	0.0243873	-0.157474	-0.0831837	-0.0557455	-0.0237527	0.040137	0.00523552	0.059007	-0.0710693	0.0693569	0.0478031	0.0137162	0.183977	-0.162529	0.218854	0.183942	-0.0882243	0.147958	-0.118065	0.0268376
3.25	0.036765	0.156615	0.0616915	0.0521225	-0.159609	0.141252	-0.031805	-0.0665737	-0.0183626	0.0685869	-0.0300861	-0.0820709	-0.0522469	0.0554191	-0.00891649	-0.159468	-0.113156	-0.0425962	-0.0105236	0.165922	0.0451006	0.0178998	-0.0497496	0.0494237	0.0610525	0.00760717	0.272426	-0.103518	0.218854	0.0899516	-0.022645	-0.0393454	-0.164637	-0.0961617
3.5	0.0351232	0.139529	0.049156	0.0148429	-0.166341	0.171612	0.075281	-0.0530692	-0.124343	-0.0173473	-0.0144331	-0.0427096	-0.061706	0.0387936	0.0568512	-0.112857	-0.120503	-0.0299952	-0.0257094	0.249536	0.0414005	-0.0224255	-0.0250037	0.0297095	-0.0212803	0.0637097	0.230113	-0.0410401	0.253993	-0.01389	0.10461	-0.053215	-0.174599	-0.116883
3.75	0.00206276	0.1584	0.0737553	0.0143011	-0.160334	0.116882	0.126501	-0.0640943	-0.18246	-0.0768647	0.0254683	-0.0259947	-0.104363	0.00214907	0.155374	-0.033452	-0.0871926	-0.0350653	-0.046654	0.160492	0.0381026	0.00862245	-0.0176275	0.106189	-0.0905121	0.0655663	0.0692208	-0.00483398	0.119214	-0.0565666	0.198643	0.0212794	-0.174599	-0.037481
4	-0.0246517	0.168908	0.0901157	0.00249173	-0.168238	-0.00461741	0.10321	-0.0895081	-0.223728	-0.0476576	0.0662431	-0.046058	-0.14123	-0.0178591	0.195357	0.0286926	-0.0172717	-0.0527885	-0.143388	-0.0169156	0.0752161	0.109381	-0.110144	0.249215	-0.0849362	-0.0518533	-0.0300411	-0.0327468	-0.063518	-0.0551527	0.225736	0.0835221	-0.174599	0.0908398
4.25	-0.00921469	0.134181	0.076665	-0.0416554	-0.183653	-0.053394	0.0473447	-0.116905	-0.145056	-0.00745487	0.131401	-0.083421	-0.0930034	0.0297802	0.232984	0.027946	0.0785543	-0.0395598	-0.359449	-0.0980768	0.0744686	0.185066	-0.185513	0.274041	-0.0521914	-0.151948	-0.0147199	-0.09489	-0.145601	-0.0464795	0.172349	0.174194	-0.174599	0.181517
4.5	0.0788244	0.0787156	0.0278087	-0.107736	-0.177389	-0.00650863	0.00105252	-0.118546	0.0248677	0.0111038	0.17317	-0.0639733	-0.0594571	0.0657008	0.22638	-0.0157033	0.0885448	0.00233587	-0.455686	-0.0739784	0.0845585	0.232924	-0.137927	0.123338	-0.0313882	-0.16089	0.0959921	-0.130962	-0.163157	-0.0352877	0.100397	0.268506	-0.118065	0.181517
4.75	0.163219	0.0849187	-0.0362061	-0.110202	-0.184674	0.0171368	-0.0597343	-0.107453	0.172388	-0.0266448	0.155944	0.0605078	-0.0908199	0.0786533	0.188314	-0.0783175	-0.00600959	0.0635655	-0.363357	-0.0024298	0.104785	0.210162	-0.0121819	-0.0622215	-0.064861	-0.144509	0.176349	-0.0933496	-0.163157	-0.0487719	0.029398	0.298513	-0.0143854	0.0964778
5	0.171362	0.155821	-0.0679708	-0.0745417	-0.209308	-0.0388388	-0.115876	-0.0817103	0.194321	-0.102065	0.0895152	0.18706	-0.148292	0.118493	0.16861	-0.109641	-0.0441129	0.160378	-0.171554	0.0807429	0.0812656	0.0869484	0.0572618	-0.168361	-0.136651	-0.170696	0.165077	-0.0297454	-0.163157	-0.0528604	0.00385377	0.22456	0.0803911	0.000154054
5.25	0.146377	0.206189	-0.080152	-0.0773666	-0.180438	-0.0929758	-0.0830255	-0.00532373	0.215299	-0.154178	0.0181312	0.217919	-0.181519	0.178986	0.221165	-0.0699389	0.0364908	0.20407	-0.0280439	0.11796	0.00872957	0.0376467	0.0690076	-0.220777	-0.195618	-0.211518	0.046272	0.000367888	-0.163157	-0.0764252	0.145349	0.143067	0.0939883	0.000154054
5.5	0.19354	0.179611	-0.119924	-0.0926311	-0.112604	-0.109726	0.0424235	0.0509688	0.203237	-0.193698	-0.00355016	0.149082	-0.212112	0.170033	0.271493	-0.0211721	0.117777	0.155435	0.0349449	0.102826	-0.0742886	0.0473524	0.101692	-0.170365	-0.182949	-0.174207	-0.0799824	-0.0245025	-0.163157	-0.122533	0.408564	0.124276	0.0754033	0.0644807
5.75	0.241221	0.145497	-0.133662	-0.0558629	-0.0776238	-0.136005	0.159359	0.0183263	0.0908725	-0.197035	0.0445431	0.0183424	-0.21823	0.097883	0.28863	-0.0249349	0.100146	0.134831	0.0711624	0.0502971	-0.103662	-0.000923702	0.163143	-0.00871449	-0.108446	-0.0760737	-0.16774	-0.0477051	-0.113338	-0.102674	0.524895	0.113147	0.0288309	0.0588427
6	0.17499	0.141994	-0.0495963	-0.0110628	-0.0911432	-0.173432	0.154431	-0.040902	-0.0534007	-0.20754	0.0854197	-0.119153	-0.174295	0.0424627	0.280136	-0.0763007	-0.000647411	0.141577	0.052943	0.0284925	-0.0346296	-0.113222	0.211095	0.125813	-0.0494776	0.0116534	-0.221958	-0.0399458	0.0278482	-0.00521355	0.459184	0.0664688	-0.0379582	-0.037481
6.25	0.0733349	0.113596	0.0783081	-0.028099	-0.12944	-0.172691	0.098282	-0.0119471	-0.124343	-0.219051	0.0746503	-0.146359	-0.0580409	0.0487852	0.241162	-0.109898	-0.0594314	0.189043	-0.000726096	0.0502959	0.0943031	-0.180042	0.197087	0.124708	-0.0675709	0.120564	-0.240863	0.00851985	0.227645	0.0966969	0.396133	0.0395719	-0.0329775	-0.122521
6.5	0.0340919	0.0608071	0.138728	0.00218006	-0.190336	-0.129269	0.0851235	0.0521905	-0.126867	-0.183268	0.107533	-0.0449293	0.0826262	0.0955308	0.177306	-0.136375	-0.0455596	0.296444	0.0110982	0.067313	0.167783	-0.163056	0.123154	0.0512435	-0.0905121	0.378666	-0.199009	0.0842883	0.319011	0.131221	0.423014	0.114675	0.0238502	-0.0905236
6.75	0.0585641	0.0380623	0.148322	0.14336	-0.239895	-0.0919837	0.052273	0.0436753	-0.119702	-0.126964	0.148596	0.0278545	0.139891	0.0842806	0.128812	-0.150517	-0.0573503	0.335439	0.1074	0.0107446	0.0709746	-0.11574	0.0792298	-0.0316546	-0.0648649	0.627047	-0.0918865	0.122163	0.227645	0.135667	0.420976	0.16662	0.0188694	0.0211996
7	0.0618462	0.0607706	0.136233	0.273684	-0.220596	-0.0705955	-0.008797	0.0400889	-0.132223	-0.0796134	0.121439	-0.0461969	0.088975	0.0586212	0.136776	-0.136274	-0.136901	0.27049	0.142796	-0.0871541	-0.0476671	-0.0751729	0.0989062	-0.0924931	0.0174641	0.546305	0.0271456	0.109854	0.136266	0.151079	0.291185	0.239221	-0.0379582	0.0964858
7.25	0.06195	0.0896645	0.0872611	0.256802	-0.146906	-0.0898126	-0.031805	0.123752	-0.129699	-0.0404947	0.0520866	-0.16673	0.0245035	0.0621578	0.221211	-0.0751233	-0.0907818	0.251284	0.0346121	-0.100155	-0.083636	-0.0558097	0.102647	-0.12957	0.112031	0.241368	0.134029	0.122428	0.177813	0.164074	0.121351	0.332508	-0.0329775	0.0211996
7.5	0.0722726	0.0952094	0.0672042	0.153472	-0.0686189	-0.0959528	-0.0268767	0.184994	-0.061435	-0.00209196	-0.00152539	-0.191867	-0.081168	0.0603121	0.235851	0.0280836	0.0204402	0.241487	-0.0905256	-0.0308437	-0.0742836	-0.0869654	0.0294845	-0.146994	0.235231	0.0311431	0.218203	0.202093	0.245214	0.161781	0.0639748	0.350341	0.0238502	-0.0641646
7.75	0.102626	0.0840045	0.0828863	0.0926662	-0.0242823	-0.0192216	-0.0367263	0.122169	0.0783518	-0.0107622	-0.0136426	-0.0649135	-0.238389	0.0308438	0.148314	0.0847937	0.0112438	0.14918	-0.0991633	0.0517471	-0.0906191	-0.139471	-0.0818932	-0.146759	0.31531	-0.0657386	0.242249	0.26813	0.169034	0.135799	0.135351	0.23075	0.0471363	-0.026205
8	0.128381	0.0643446	0.0910546	0.126763	-0.0529911	0.0794915	-0.0367263	0.00573605	0.19237	-0.0345005	-0.00259055	0.133694	-0.316736	0.029969	0.0554618	0.0590487	-0.0768552	0.0274408	-0.0349358	0.0942782	-0.153808	-0.153789	-0.117925	-0.145493	0.268859	-0.0593993	0.199059	0.313107	0.0776679	0.0797392	0.215735	0.106358	0.0421485	0.0908398
8.25	0.13874	0.0560069	0.0845875	0.229606	-0.155222	0.0595411	-0.0268767	-0.0606568	0.22009	-0.0477883	0.0195102	0.232556	-0.266124	0.0590963	0.0885008	0.03595	-0.0721052	0.0036579	0.0515601	0.0613431	-0.206509	-0.127533	-0.0299493	-0.110787	0.117451	0.100378	0.249006	0.322925	0.104016	-0.018208	0.143438	0.097413	0.0803841	0.213515
8.5	0.165949	0.0402358	0.0749649	0.30607	-0.281535	-0.0149617	-0.0367263	-0.0926324	0.154654	-0.00467046	0.00537059	0.173621	-0.177278	0.0735089	0.228056	0.0618688	-0.0303983	0.0957858	0.143381	-0.0308951	-0.16685	-0.0820623	0.115707	-0.0655861	-0.00532494	0.307182	0.380408	0.280204	0.169034	-0.113373	-0.0185597	0.122597	0.103957	0.272195
8.75	0.194996	0.00607445	0.0977267	0.347347	-0.348608	-0.057736	0.0191323	-0.0854653	0.0379537	0.0861986	-0.030102	0.0177134	-0.115108	0.074355	0.296106	0.0825273	-0.0843287	0.112053	0.19101	-0.0995026	-0.0414166	-0.0228164	0.206907	-0.0410118	-0.0748245	0.304802	0.352323	0.248889	0.227645	-0.176175	-0.128729	0.175521	0.0471363	0.224799
9	0.192492	-0.023134	0.176486	0.28901	-0.317014	-0.0668052	0.159352	-0.046645	-0.0560788	0.145588	0.00367384	-0.0693938	-0.0992207	0.0725245	0.201962	0.0522517	-0.108264	-0.0203301	0.164159	-0.085072	0.104594	0.0707959	0.222507	-0.0360415	-0.0877983	0.124492	0.165071	0.271852	0.186603	-0.185335	-0.11281	0.218365	-0.0612444	0.0588347
9.25	0.127795	-0.0396685	0.286429	0.170968	-0.27438	-0.0506685	0.266438	-0.0206464	-0.0785886	0.123263	0.108365	-0.0283865	-0.133464	0.0403953	0.0472844	0.048973	-0.05731	-0.140737	0.105484	-0.0621758	0.170328	0.111509	0.195271	-0.0114198	-0.0802444	-0.014018	-0.00686526	0.259227	0.0278482	-0.141645	0.00194038	0.179294	-0.141351	-0.0585266
9.5	0.0265007	-0.0432106	0.313707	0.0828396	-0.219957	-0.0319267	0.23358	-0.0320178	-0.101671	0.0769221	0.146504	0.0700456	-0.165255	-0.00190146	-0.0256503	0.0751212	-0.0109444	-0.0988954	0.0236133	-0.117348	0.19695	0.0371179	0.166729	0.0635115	-0.0469237	-0.0493625	-0.0608503	0.180095	-0.0547396	-0.0811351	0.0882369	0.0629261	-0.141351	-0.0582021
9.75	-0.0164234	-0.0476464	0.238395	0.030536	-0.120137	-0.0558119	0.108132	-0.0342524	-0.162775	0.0353235	0.0863511	0.127773	-0.118601	-0.0119359	0.039294	0.0964523	0.0338546	0.0771674	-0.1025	-0.154918	0.184309	-0.0652287	0.139939	0.169308	-0.00318705	-0.0663755	-0.00685374	0.0426026	-0.0131931	-0.0120841	0.0490669	-0.0868092	-0.0944921	0.0321592
10	0.0432692	-0.0710577	0.111594	-0.0187335	-0.0377386	-0.111066	0.0289748	-0.0185982	-0.23357	0.0106491	0.0674027	0.123552	-0.085762	-0.00862436	0.076361	0.0701467	0.0503235	0.203378	-0.153786	-0.0682525	0.0847596	-0.0391248	0.102134	0.253272	0.0402454	-0.116896	0.0152357	-0.049125	0.0366391	0.0231962	-0.0453108	-0.174057	-0.0329704	0.143874
10.25	0.0890879	-0.106645	0.00780091	-0.0456751	-0.0636667	-0.109188	0.0473447	-0.00277615	-0.248923	0.00200086	0.110839	0.121429	-0.12881	0.0224461	0.0346132	0.0159422	0.0786356	0.191857	-0.140928	0.0633775	-0.050965	0.108983	0.0820862	0.284552	0.0892498	-0.140702	-0.0149411	-0.0479361	-0.0219716	-0.078711	-0.071477	-0.203453	0.0138815	0.219161
10.5	0.0731121	-0.12896	-0.0631555	0.0340331	-0.1629	-0.0499068	0.0851305	0.00792912	-0.193176	-0.0037105	0.107793	0.106482	-0.199569	0.0519333	-0.0222376	-0.00329392	0.108386	0.0900556	-0.0816184	0.0836485	-0.12699	0.200076	0.0894808	0.26143	0.0993654	-0.101844	-0.0837992	-0.00201394	-0.0136983	-0.209295	-0.0307262	-0.15973	0.131937	0.187155
10.75	0.0336267	-0.122639	-0.0632871	0.178792	-0.215862	0.0187473	0.0703527	0.0425141	-0.11702	0.0143815	0.0542393	0.0926174	-0.170911	0.0634239	-0.0475788	0.0133026	0.159478	-0.0365921	0.00627194	0.0560626	-0.143321	0.0727822	0.0948475	0.210138	0.0945175	-0.0276273	-0.111024	0.0640436	0.127993	-0.18076	0.00194346	-0.120424	0.26417	0.117191
11	0.0108817	-0.115139	0.0160592	0.241908	-0.188654	0.0443577	0.098282	0.0887597	-0.0766299	0.0535669	-0.00919557	0.0503416	-0.107147	0.00892415	-0.040392	0.0619351	0.202284	-0.120206	0.0730307	0.0329267	-0.173637	-0.105941	0.0602065	0.141678	0.112027	0.0189681	-0.0568009	0.118989	0.236436	-0.0718372	-0.0307231	-0.183535	0.35866	0.134113
11.25	-0.0067767	-0.114146	0.0946159	0.161833	-0.149331	0.0562087	0.169202	0.136397	-0.0462324	0.0545856	-0.0190641	-0.0106839	-0.0955087	-0.0351033	-0.0845557	0.0620649	0.148596	-0.128396	0.0283272	-0.0275556	-0.170344	-0.146226	0.0682508	0.0914194	0.19978	0.0464683	0.0230962	0.109994	0.119214	-0.0488971	-0.0924343	-0.26134	0.42409	0.187155
11.5	-0.0127957	-0.0783421	0.0710024	0.0156404	-0.149586	0.0738989	0.18236	0.175501	-0.0255195	-0.00824146	0.0536116	-0.0403609	-0.136222	-0.0138554	-0.132173	0.023853	0.0129246	-0.126912	-0.0645078	-0.0944278	-0.113948	-0.0414948	0.144441	0.0614758	0.222873	0.115436	0.0651829	0.022942	-0.063518	-0.0817566	-0.114851	-0.233683	0.495588	0.181517
11.75	-0.00683092	0.0129849	-0.0345435	-0.106116	-0.168518	0.0932327	0.149502	0.166883	-0.0560712	-0.141279	0.133449	0.00365944	-0.107365	0.045381	-0.106544	-0.0307078	-0.0234689	-0.0792458	-0.0953301	-0.0996925	-0.0707846	0.111363	0.222103	-0.00808241	0.132682	0.275407	0.077087	-0.0610319	-0.0459611	-0.0629442	-0.110513	-0.106503	0.420748	0.128475
12	0.00773345	0.119843	-0.144377	-0.114142	-0.13176	0.105499	0.14591	0.0914766	-0.0893085	-0.216537	0.122086	0.0876767	0.010754	0.0601359	0.0433005	-0.0104841	0.168795	0.114925	-0.0714902	-0.0366186	-0.0579531	0.23981	0.219625	-0.0991537	0.0148985	0.397457	0.0651771	-0.0641127	0.119214	-0.0487719	-0.143765	-0.0157107	0.150522	0.0588347
12.25	0.0728545	0.171447	-0.183644	0.0129656	-0.0244548	0.115458	0.0985652	0.000239149	0.00472013	-0.17671	0.0650295	0.136953	0.105024	0.0239871	0.193362	0.0958149	0.351398	0.35923	-0.0153709	-0.0023269	-0.00175754	0.324152	0.165489	-0.154926	-0.0387939	0.389018	0.077087	0.0215255	0.286255	0.0160589	-0.164265	0.0597696	-0.0748558	0.00580011
12.5	0.146011	0.147852	-0.158535	0.116295	0.0655816	0.173553	0.0240605	-0.0571357	0.149452	-0.0906968	0.0414781	0.0731615	0.0576952	-0.00921779	0.222214	0.177037	0.286383	0.401103	0.00679464	-0.0379954	0.0917527	0.266889	0.125729	-0.14294	-0.0594411	0.199036	0.0503214	0.101578	0.2604	0.129678	-0.10256	0.159304	-0.159657	0.0321511
12.75	0.157402	0.108006	-0.126064	0.124017	0.0486027	0.233839	-0.0268837	-0.0549666	0.167182	-0.0957164	0.0201738	-0.0221581	-0.0391145	-0.0220337	0.115902	0.149626	0.0246689	0.170589	-0.0506512	-0.0798073	0.0744736	0.0707923	0.110061	-0.0752986	-0.0803965	0.00421181	-0.0419394	0.103868	0.136279	0.155049	0.0142346	0.213069	-0.146332	0.143874
13	0.0738152	0.111196	-0.0845171	0.0405165	-0.00619057	0.201887	-0.008797	-0.0194599	0.0703061	-0.166939	-0.00620154	-0.0403545	-0.0630748	-0.0197883	-0.03022	0.0792701	-0.152025	-0.0596761	-0.18483	-0.0879464	-0.0147951	-0.0889625	0.0920258	-0.0295628	-0.0749766	-0.0730617	-0.125886	0.0110351	0.0454051	0.0858598	0.122942	0.141976	-0.0944921	0.262442
13.25	-0.0082899	0.139255	0.027696	-0.0618293	-0.0144065	0.0902855	0.0802023	0.016597	0.0656694	-0.155779	-0.0141543	-0.024974	-0.0361538	0.000918092	-0.105725	0.0148146	-0.131703	-0.114868	-0.263255	-0.037564	-0.08713	-0.0795471	0.0448264	-0.0426984	-0.0494815	-0.0853551	-0.152878	-0.111386	0.0278482	0.0100635	0.165855	0.00969739	-0.0612373	0.266549
13.5	-0.0636681	0.153017	0.197809	-0.175763	0.0083498	0.00509411	0.154431	0.0649307	0.147493	-0.0626652	-0.0370786	-0.00757112	-0.0161468	0.023146	-0.119375	-0.0556467	-0.037295	-0.0879511	-0.219731	-0.0250123	-0.107156	0.0446885	0.00375993	-0.113876	-0.0160087	-0.0848227	-0.148829	-0.171317	0.0454176	-0.0481504	0.141733	-0.0213496	-0.0944921	0.245512
13.75	-0.0809508	0.138144	0.280186	-0.252124	0.00685129	0.00778178	0.154431	0.0966782	0.116222	0.00295018	-0.0715593	-0.0170219	-0.0513416	0.0741579	-0.102007	-0.0618923	0.0104894	-0.0117633	-0.0150135	-0.0558131	-0.0742886	0.092149	-0.0154152	-0.178194	0.0402415	-0.114935	-0.179871	-0.169103	-0.0219716	-0.152347	0.0533953	0.0744242	-0.146332	0.204078
14	-0.0659206	0.131527	0.249011	-0.216622	-0.0320558	0.0454286	0.108132	0.0551228	-0.0283555	-0.0453519	-0.0729945	-0.0563014	-0.139618	0.143933	-0.127948	-0.0210029	-0.0410775	0.0433122	0.134391	-0.0563176	0.00174148	0.0251802	-0.0397795	-0.1708	0.145504	-0.115048	-0.221958	-0.171479	-0.113338	-0.313224	0.0696441	0.102413	-0.169618	0.0531966
14.25	-0.0363058	0.129069	0.183784	-0.107728	-0.0873774	0.0700395	0.0473447	-0.0240824	-0.124347	-0.108737	-0.0084701	-0.0754709	-0.180529	0.212371	-0.231523	0.0198907	-0.0956702	-0.00716054	0.150205	0.0139259	0.0847596	-0.0558169	-0.0493898	-0.107263	0.225431	-0.0532847	-0.240863	-0.201728	-0.154379	-0.375671	0.242014	0.0251055	-0.146332	-0.0905236
14.5	-0.0288632	0.0932183	0.159866	-0.046851	-0.116169	0.0321779	0.0289818	-0.0596699	-0.126867	-0.0829291	0.0938436	-0.0316457	-0.153348	0.206302	-0.313416	0.0373532	-0.106326	-0.101398	0.134623	0.128949	0.0943031	-0.0627027	-0.0379695	-0.0650014	0.191802	0.00391349	-0.221958	-0.210555	-0.163157	-0.302394	0.433152	-0.0642545	-0.0662252	-0.14888
14.75	-0.0102718	0.0320363	0.17779	-0.0625517	-0.142464	-0.011438	0.0473447	-0.0602524	-0.0991435	0.0266157	0.131313	0.0508649	-0.131526	0.130919	-0.32301	0.0378845	-0.106699	-0.118399	0.144542	0.24566	0.0285641	-0.0725054	-0.0448143	-0.0386931	0.117295	0.0150432	-0.133973	-0.188724	-0.163157	-0.180743	0.426307	-0.000188569	0.0754033	-0.160156
15	0.0413693	-0.0128651	0.244713	0.00879381	-0.183791	-0.0389494	0.075281	-0.113344	-0.0945106	0.109595	0.087946	0.0934332	-0.135784	0.0639725	-0.303315	0.0358892	-0.0918414	-0.107023	0.123117	0.305253	-0.0906241	-0.125152	-0.120159	-0.0365737	0.110049	-0.0125754	-0.0228015	-0.142377	-0.163157	-0.137681	0.319852	0.134607	0.179083	-0.160156

## Sheet: Fig2 Fig suppl 2CD Units
	Fig suppl 2C	Fig suppl 2D
	NG sound withhold	Movement
Up	3	7
Down	14	27
Nonresponder	51	40

## Sheet: Fig2 Fig suppl 2F
Period:	Precue period	Go sound	No-Go sound	Reward period	ITI period
Percent:	29.6721	0.655738	4.26229	9.18033	55.7377
