# Supplementary material for: Dissociation of impulsive traits by subthalamic metabotropic glutamate receptor 4
Source: eLife. 2022 Jan 4;11:e62123. doi: 10.7554/eLife.62123 (PMC8803315; doi:10.7554/eLife.62123)
Supplement: Figure 2—figure supplement 3—source data 1. [file elife-62123-fig2-figsupp3-data1.xlsx]

## Sheet: Fig2 suppl 3Ai
Time (sec)	Theta
-9	-0.47737	-0.34804	-0.4039	-0.43898	-0.31658	-0.42678	-0.39997	-0.35251	-0.17171	-0.46684	-0.59559	-0.48377	-0.61362	-0.52086	-0.83706	-0.57729		-0.3829	-0.38894	-0.4497	-0.28209	-0.2866	-0.28797	-0.47992	-0.77433	-0.4985	-0.35522	-0.38212	-0.45319	-0.48786	-0.53789	-0.57233	-0.50843		-0.43044	-0.43363	-0.43493	-0.43204	-0.43552	-0.4357	-0.43179	-0.43351	-0.69751	-0.67196	-0.42314	-0.42609	-0.41987	-0.4295	-0.42424
-7	-0.7179	-0.52781	-0.57195	-0.54998	-0.70075	-0.55451	-0.64422	-0.93527	-0.73399	-0.79447	-0.80925	-0.73255	-0.77215	-0.57964	-0.75756	-0.85264		-0.68745	-0.67651	-0.71015	-0.35782	-0.36118	-0.36732	-0.56493	-0.79625	-0.03401	-0.11142	-0.71115	-0.74759	-0.38702	-0.41095	-0.45864	-0.60887		-0.41723	-0.42536	-0.42434	-0.42383	-0.42122	-0.42825	-0.41722	-0.41597	-0.61367	-0.65734	-0.39048	-0.40707	-0.40433	-0.39412	-0.38827
-5	-0.78516	-0.53998	-0.61269	-0.55454	-0.65075	-0.50802	-0.66602	-0.79168	-0.61257	-0.67087	-0.53354	-0.78688	-0.18556	-0.70836	-0.96819	-0.95888		-0.7143	-0.73086	-0.64787	-0.50707	-0.50944	-0.50461	-0.629	-0.72928	-0.00568	-0.35639	-0.84233	-0.65167	-0.3691	-0.51506	-0.47938	-0.4852		-0.42613	-0.42058	-0.42677	-0.42072	-0.41795	-0.42051	-0.41725	-0.42044	-0.7356	-0.74568	-0.42724	-0.42957	-0.42711	-0.42353	-0.42894
-3	-0.68276	-0.5718	-0.59419	-0.62337	-0.64304	-0.64206	-0.65325	-0.61207	-0.30573	-0.38159	-0.46376	-0.70194	-0.09481	-0.53924	-0.46551	-0.32042		-0.82745	-0.86709	-0.79189	-0.53587	-0.53496	-0.53487	-0.47865	-0.05595	1.1144	1.0806	-0.65116	-0.81628	0.484483	-0.05439	0.334778	0.524497		-0.54374	-0.54115	-0.54179	-0.54035	-0.53839	-0.54034	-0.5417	-0.53774	-0.79715	-0.78726	-0.54448	-0.54372	-0.54509	-0.52953	-0.55115
-1	0.850316	0.993779	0.977053	0.808479	0.810216	0.852661	0.729609	1.06193	-0.296	0.134708	0.388747	0.937866	0.98505	1.12931	1.42215	1.36699		0.565067	0.481757	0.529443	0.731002	0.719564	0.727812	0.91223	1.05239	0.044643	0.580962	0.600901	0.485294	1.50194	1.59552	1.52333	1.32398		0.979742	0.996486	1.01096	0.977666	1.00189	1.02687	0.969357	0.974083	0.342556	0.389968	0.958154	0.950888	0.939999	0.951196	0.94474
1	0.861781	2.0689	2.02134	0.946002	0.831723	0.846225	0.761423	1.66862	-0.59583	0.05848	0.270566	0.935893	-0.57234	1.83807	0.508159	0.795752		1.78143	1.80524	1.78811	1.91968	1.92037	1.92397	1.78942	1.34298	-0.08767	0.392113	1.77595	1.79886	0.841463	1.16305	0.866265	0.689155		1.98288	1.98253	1.97863	1.99049	1.98006	1.97372	1.98996	1.98859	2.19645	2.16462	1.98688	2.00043	2.00416	1.99748	1.99614
3	-0.0475	-0.1503	-0.10547	-0.25235	-0.17292	-0.21079	-0.12681	0.326674	-0.02854	0.025503	-0.13776	-0.07225	-0.48539	0.214677	0.330117	0.443665		0.744618	0.752224	0.750272	0.094138	0.096375	0.092143	0.329914	0.741231	-0.44083	-0.37216	0.732827	0.768917	-0.20805	-0.0177	0.112026	0.288648		0.020224	0.011479	0.010499	0.013544	0.004765	0.003329	0.017397	0.01545	0.258746	0.189025	0.001901	0.012509	0.008708	0.000332	0.004046
5	-0.08877	-0.3699	-0.34665	-0.28692	-0.08418	-0.2619	-0.08174	0.153543	1.17757	0.796851	0.610089	-0.1228	0.479727	-0.22037	0.275545	0.156275		0.123592	0.064477	0.126364	-0.30673	-0.29523	-0.29856	-0.22972	-0.21869	-0.01923	0.0248	0.131448	0.14614	-0.48256	-0.35451	-0.34633	-0.38132		-0.45229	-0.45124	-0.45474	-0.44853	-0.45758	-0.45428	-0.45746	-0.45577	0.111045	0.007709	-0.45907	-0.45086	-0.45341	-0.47033	-0.45756
7	0.512958	-0.30927	-0.21902	0.439568	0.396625	0.397145	0.484748	-0.21958	1.09861	1.03543	1.02445	0.462787	1.23075	-0.26374	0.324642	-0.11403		-0.21495	-0.08855	-0.23123	-0.33946	-0.33216	-0.33428	-0.3277	-0.30046	-0.19549	-0.48116	-0.23874	-0.17461	-0.40731	-0.3652	-0.38986	-0.32896		-0.38639	-0.38375	-0.38416	-0.38245	-0.38369	-0.38838	-0.38125	-0.38814	-0.11144	-0.00584	-0.38124	-0.38168	-0.37725	-0.38244	-0.37497
9	0.574396	-0.24557	-0.14452	0.512096	0.52965	0.508022	0.596235	-0.29966	0.46819	0.262801	0.246056	0.563655	0.028347	-0.34986	0.167712	0.060573		-0.38767	-0.35175	-0.36335	-0.41579	-0.41673	-0.41632	-0.32164	-0.26166	0.122363	-0.40211	-0.41562	-0.35587	-0.48599	-0.50286	-0.58985	-0.51351		-0.32664	-0.33477	-0.33336	-0.33377	-0.33237	-0.33647	-0.33005	-0.32656	0.046576	0.116761	-0.32128	-0.32484	-0.32581	-0.31957	-0.31979
[truncated: 97 more columns]

## Sheet: Fig2 suppl 3Aii
Time (sec)	Theta
-9	0.423346	-0.40933	0.323889	2.01461	-0.04156	0.594779	1.89037	-0.33711	0.654329	0.372946	0.116348	0.627945	0.123984	0.113077	0.70164	0.455626	0.11631	0.730811	0.050167	0.182066	1.41261	0.653108	0.426063	0.704465	0.31089	-0.22939	0.507986	0.760524	-0.2459	0.639415	0.737616	-0.47662	0.719836	0.579029	-0.39385	0.66805	-0.49787	-0.51676	0.7277	2.02447	-0.23907	0.522507	0.662902	-0.18178	0.618341	-0.14529	0.019247	1.46115
-7	-0.57443	0.045013	0.231642	-0.53863	0.084315	0.382414	-0.6449	-0.04192	0.382276	-0.45849	-0.23677	0.372142	-0.4958	-0.26776	0.524674	-0.52463	-0.26521	0.532358	-0.68859	-0.01642	-0.04947	-0.75882	-0.48298	0.521739	0.129496	0.300513	0.291546	0.510722	-0.11854	0.327644	0.604302	0.104236	0.386352	-0.50478	-0.09151	0.586425	-0.09151	-0.64055	0.511848	-0.29711	-0.73229	0.70708	0.413875	-0.75255	0.822858	-0.21203	-0.72299	1.20611
-5	-0.584	-0.91671	-0.4151	-0.65003	-1.10592	-0.2817	-0.68366	-0.93641	-0.29538	-0.55261	-0.59269	-0.31731	-0.29231	-0.60489	-0.05053	-0.4377	-0.6057	-0.05594	-0.38636	-0.39456	-0.51279	-0.6665	-0.62553	-0.05084	-0.27295	1.38817	-0.32422	-0.50445	0.278546	-0.05396	-0.48756	-0.7458	-0.12416	-0.56666	-0.94629	0.167513	0.579524	0.264016	-0.07769	-0.34546	0.015915	0.827011	0.066746	-0.07708	1.13389	-0.51379	-0.10714	0.205737
-3	-0.08684	-0.39842	-0.63379	-0.36416	-0.31201	-0.48317	-0.30767	-0.48289	-0.42955	0.043112	-0.49812	-0.43166	0.067104	-0.4949	-0.62927	0.106495	-0.49441	-0.60752	-0.11943	-0.71314	-0.20588	-0.65028	-0.30887	-0.61624	-0.87806	0.935641	-0.70279	-0.93108	1.61239	-0.62374	-0.80957	0.467298	-0.56863	-0.15064	-0.44556	-0.60022	-0.15449	1.59894	-0.64057	-0.40466	0.274772	-0.49844	-0.48545	1.42478	-0.262	-0.50482	1.06975	0.040278
-1	-0.85415	0.504679	-1.43917	0.318246	0.441286	-1.20183	0.263585	0.382642	-1.16051	-0.73431	-0.29629	-1.15659	-1.16193	-0.31332	-1.29983	-0.66059	-0.30994	-1.29277	-0.87707	-0.51329	-1.0014	0.811191	0.561172	-1.29095	-1.61073	-1.13347	-1.34481	-1.39024	-0.68703	-1.31395	-1.27506	0.415895	-1.32625	-0.81771	0.544456	-1.39067	0.634021	0.197592	-1.29304	0.505212	0.287637	-1.38316	-0.0945	0.405887	-1.24069	1.36838	0.868151	-1.17558
1	0.673413	2.2111	-0.0904	0.759904	1.87232	-0.00906	0.867603	2.2985	0.092386	-0.08998	0.062033	0.107837	0.438608	0.044706	0.100046	-0.14966	0.063248	0.089349	0.381408	0.359455	0.864912	1.75751	1.21995	0.082041	0.615758	0.384527	0.127195	-0.01752	0.087656	0.145425	-0.10052	2.00882	0.04872	0.812901	2.24056	-0.1245	-0.0259	-0.37808	0.104429	0.748383	-0.68994	-0.17721	1.00813	-0.35613	-0.37385	1.56292	0.272658	-1.19693
3	0.740821	0.077919	0.666067	-0.25393	0.251897	0.25818	-0.04004	0.131779	0.16936	0.358554	-0.006	0.19555	0.49815	0.025289	0.497803	0.279225	0.057053	0.495804	0.703004	0.559294	0.77958	-0.02818	0.401255	0.49284	0.968128	-0.43493	0.748321	0.569472	-0.37872	0.596613	0.458282	-0.02302	0.579559	0.797161	0.153905	0.532971	-0.85382	-0.74698	0.532925	-0.42166	-0.7104	0.413389	-0.09325	-0.67201	0.044367	-0.24471	-0.58945	0.537966
5	0.792422	-0.58831	0.5888	-0.28293	-0.62528	0.333528	-0.05258	-0.64969	0.273769	0.461686	-0.3231	0.274004	0.122427	-0.30775	0.142419	0.035624	-0.31705	0.148252	0.692505	-0.23233	-0.07644	-0.47811	0.039431	0.141277	0.493755	-0.42956	0.487875	0.694644	-0.15735	0.286885	0.647132	-0.72971	0.267323	0.412944	-0.63096	0.220311	-0.57624	0.475386	0.10589	-0.54856	0.811419	-0.01597	-0.89279	0.393846	-0.17918	-0.70707	0.278812	-0.35258
7	-0.56692	-0.64444	0.545381	-0.84186	-0.73379	0.386121	-0.90531	-0.39229	0.270435	0.273474	0.124321	0.278304	0.100041	0.13125	0.155069	0.497629	0.116787	0.115265	0.029483	0.008872	-0.25992	-0.75907	-0.37508	0.14049	0.25132	-0.28928	0.261028	0.409997	-0.31487	0.152916	0.395383	-0.79577	0.158587	-0.60208	-0.37478	0.093957	-0.07894	0.061744	0.161536	-0.84921	0.290159	-0.05814	-0.13322	0.125244	-0.14975	-0.43134	-0.32414	-0.03098
9	0.036347	0.118503	0.222679	-0.16122	0.168746	0.020728	-0.38739	0.027393	0.042883	0.325619	1.65026	0.049769	0.599731	1.6743	-0.14202	0.397983	1.63891	-0.15561	0.214886	0.76005	-0.9512	0.119154	-0.85541	-0.12482	-0.00761	-0.49222	-0.05212	-0.10207	-0.07619	-0.15725	-0.17002	-0.22533	-0.14134	0.039822	-0.05596	-0.15383	1.06522	-0.31531	-0.13304	-0.41141	0.691797	-0.33707	-0.45244	-0.31021	-0.41399	-0.17225	-0.7649	-0.69516

## Sheet: Fig2 suppl 3Aiii
Time (sec)	Theta
-9	-0.55656	-0.34546	-0.54382	-0.71215	-0.47321	-0.75606	-0.70862	-0.54597	-0.23619	-0.35342	-0.49629	-0.58022	-0.61148	-0.678	-0.98845	-1.20303	-0.51808	-0.60776	-0.43356	-0.27626	-0.27976	-0.29333	-0.14883	0.171705	0.149907	0.4316	-0.16497	-0.26882	1.35187	0.949441	1.26716	0.671664	-0.3024	-0.25792	-0.28827	-0.29991	-0.25322	-0.23344	0.577859	-0.23575	-0.36953	-0.23007	-0.21042	-0.11437	-0.24695	-0.08022	0.339469	1.59671
-7	-0.41216	-0.53335	-0.56754	-0.27727	-0.16798	-0.2347	-0.24994	0.094466	-0.20502	-0.30945	-0.18503	-0.41036	0.406143	0.124309	0.42709	0.309679	0.843324	0.635734	0.687242	0.265855	0.277034	0.270383	0.788826	0.359628	0.867127	0.578643	1.18548	0.658018	0.653595	0.574454	0.904431	1.20025	-0.35013	-0.24143	-0.24031	-0.25015	-0.28974	-0.2832	-0.03049	-0.29184	-0.33646	-0.32867	-0.296	-0.34819	-0.30381	-0.33422	-0.11166	0.156236
-5	-0.52823	-0.40893	-0.49562	-0.11526	-0.39126	-0.06111	-0.41391	-0.56112	-0.74314	-0.53948	-0.37933	-0.52119	0.089455	-0.34129	0.013697	-0.04835	1.04122	1.24449	0.835617	0.629192	0.63054	0.640533	0.896065	1.27954	0.176585	0.527475	1.15554	1.01544	0.961627	1.01718	1.03448	1.31525	-0.71631	-0.51828	-0.43712	-0.44327	-0.56466	-0.56727	-0.57321	-0.56774	-0.63791	-0.5321	-0.52566	-0.56418	-0.5582	-0.58279	-0.56364	-1.27292
-3	-0.78584	-0.68218	-0.68942	-0.48509	-0.88795	-0.42305	-0.87774	0.373862	-1.08585	-0.83655	-0.71773	-0.75906	0.177657	-0.3466	0.6086	0.989954	-0.07031	0.376042	-0.21427	-0.86314	-0.87667	-0.8624	-0.70953	0.43161	0.800271	0.244982	0.433357	0.102208	-0.01109	-0.56814	-0.01104	0.286113	-0.54685	-0.47854	-0.42714	-0.43522	-0.5094	-0.50453	1.19503	-0.50784	-0.43311	-0.33427	-0.34539	-0.39068	-0.50673	-0.35228	-0.38348	-0.05591
-1	0.80666	1.78821	1.59404	0.618781	0.683765	0.630199	0.512713	2.00487	0.377786	0.860498	0.720269	0.895675	-0.64767	2.0325	1.30421	1.25675	0.953755	1.12414	0.971545	0.762817	0.748941	0.775752	0.203314	-0.15881	-1.07037	-0.95633	0.287846	0.979447	-1.01532	-0.54544	-0.89732	-0.83635	1.72732	1.93274	1.93049	1.92709	1.88108	1.88289	0.281491	1.87287	1.83684	1.70699	1.68804	1.72144	1.89691	1.70163	1.65632	0.254251
1	1.38338	1.2247	1.31754	0.723717	1.0658	0.534005	1.16206	0.827007	1.73741	1.18359	0.830433	1.45168	-0.35387	0.639175	0.042063	0.01715	0.2489	0.143558	0.370464	1.00097	1.00839	1.0199	0.961452	0.316144	-0.12332	0.052953	-0.20684	0.187363	-0.65823	-0.49078	-0.83635	-0.75132	1.32602	0.971394	1.02095	1.0494	1.10896	1.08068	-1.24095	1.09833	1.15056	1.05968	1.05141	1.01324	1.11812	0.978644	0.600059	0.150158
3	0.565791	0.142182	0.361308	0.664362	0.318525	0.645239	0.689314	-0.41094	0.591451	0.38974	0.329842	0.469083	0.583954	-0.28719	-0.78301	-0.71373	0.240915	-0.12252	0.267114	-0.01214	-0.01706	-0.02274	0.201634	-0.03051	0.376101	0.108103	-0.01063	0.029365	-0.33343	-0.26817	-0.50377	-0.45435	-0.05194	-0.13821	-0.13667	-0.12939	-0.12816	-0.12201	-0.91172	-0.12411	-0.16994	-0.15102	-0.17421	-0.13529	-0.14459	-0.26428	-0.49304	-0.37197
5	-0.06714	-0.15447	-0.10284	0.097896	0.005737	0.124361	0.082293	-0.47992	0.084291	0.248924	0.415547	-0.07875	0.695356	-0.2358	-0.21337	-0.53417	-1.15549	-1.01849	-1.14727	-0.54371	-0.52547	-0.54701	-0.65854	-0.61647	-0.7786	-0.61794	-1.23881	-1.1657	-0.53809	-0.46824	-0.4874	-0.58423	-0.25573	-0.42872	-0.49782	-0.50044	-0.44999	-0.45502	0.38802	-0.45316	-0.43221	-0.59536	-0.58343	-0.57967	-0.45939	-0.53444	-0.53979	-1.11012
7	-0.05143	-0.15691	-0.09912	-0.15626	0.055454	-0.15304	0.036627	-0.31093	0.011854	0.147758	0.112602	-0.06495	-0.12952	0.057709	0.218418	0.253129	-0.87841	-0.93049	-0.84513	-0.52021	-0.52063	-0.53034	-0.88008	-1.06406	0.331223	-0.03869	-0.57266	-0.89009	-0.13003	-0.16911	-0.33958	-0.48867	-0.30765	-0.49146	-0.54492	-0.54445	-0.49697	-0.50606	0.0271	-0.4947	-0.39141	-0.47013	-0.45595	-0.45137	-0.49933	-0.42866	-0.42203	0.138052
9	-0.35448	-0.87379	-0.77451	-0.35873	-0.20887	-0.30584	-0.23279	-0.99133	-0.5326	-0.79162	-0.63031	-0.40191	-0.21003	-0.96481	-0.62925	-0.32738	-0.70582	-0.84471	-0.49176	-0.44337	-0.44532	-0.45075	-0.65431	-0.68878	-0.72893	-0.3308	-0.86832	-0.64723	-0.28089	-0.0312	-0.1306	-0.35835	-0.52235	-0.34957	-0.37918	-0.37365	-0.2979	-0.29204	0.286866	-0.29606	-0.21683	-0.12504	-0.14838	-0.15092	-0.29603	-0.10338	-0.0822	0.51552

## Sheet: Fig2 suppl 3Bi
Time (sec)	Theta
-9	-0.16228	2.14647	0.458565	0.060673	1.92937	-0.3774	0.101518	2.17137	-0.3167	-0.43027	0.087851	-0.26436	-0.42948	0.133033	-0.22103	-0.40315	0.300201	-0.19291	-0.24202	0.69213	1.18826	2.01507	1.47576	-0.24558	0.326008	0.341034	-0.18266	0.075957	0.422403	-0.46136	-0.07216	2.08072	-0.56252	-0.1282	2.15359	-0.62372	-0.57242	0.380827	-0.18264	0.639322	0.502678	-0.72915	0.61785	0.561579	-1.49087	1.21686	0.9817	-2.28781
-7	1.02135	0.87259	0.802713	-0.37714	1.20377	0.271346	0.26715	0.935965	0.206965	1.03231	-0.28495	0.237169	0.863327	-0.25242	0.222293	0.949917	-0.17802	0.250702	1.13473	0.026944	1.24493	-0.25473	0.287872	0.226822	1.42797	-0.28302	0.77885	1.38913	-0.20175	0.375072	1.4381	0.940226	0.250745	0.972792	0.962186	0.107347	0.117913	0.24735	0.245366	-0.1535	0.197278	0.171877	0.677345	0.466193	0.001162	-0.48858	0.480806	0.435328
-5	1.32262	0.254307	0.281144	-0.02758	0.440706	0.288291	0.523749	0.19346	0.15245	1.23562	-0.46871	0.140404	1.05732	-0.42711	0.126855	1.08922	-0.30006	0.13911	1.12719	-0.05009	0.577302	-0.33201	0.510794	0.134403	1.11757	0.357984	0.113287	0.999083	0.082051	0.217336	0.974255	0.346705	0.330603	1.23549	0.303852	0.32382	0.247396	0.962726	0.105504	-0.25478	0.997584	0.203166	-0.02669	1.06373	0.305851	-0.69528	0.880882	0.922969
-3	-0.08008	0.037197	0.67381	-0.41999	-0.1146	0.948115	-0.3736	0.045707	0.919332	0.259325	-0.24311	0.910136	0.254979	-0.17266	0.999108	0.370157	0.008302	0.963261	0.175369	-0.08239	0.028688	-0.19919	-0.24459	0.9787	0.45144	0.132024	1.03067	0.622079	-0.06071	1.04273	0.612977	0.030546	1.02972	-0.16202	-0.09479	1.16927	0.133166	0.226495	1.00108	-0.02986	-0.01159	1.31897	0.934844	0.195719	1.18801	0.621914	0.226925	0.869308
-1	0.252099	-0.5232	0.330916	-0.22188	-0.57919	-0.06704	-0.29483	-0.55859	-0.1108	0.177005	0.249681	-0.12299	0.649508	0.251637	-0.07082	0.203112	0.355845	-0.1746	0.430853	0.147314	-1.01717	-0.46561	-0.02323	-0.0892	-0.4442	-0.45144	-0.27145	-0.2959	-0.34116	-0.3676	-0.0864	-0.57725	-0.24511	0.246685	-0.69096	-0.23318	0.413658	-0.06159	-0.10993	-0.57626	0.121976	-0.26577	0.034303	-0.07648	-0.15665	0.084474	-0.45289	0.241478
1	0.046857	-0.5096	-0.19225	-0.10165	-0.62126	0.22222	-0.27356	-0.4018	0.334438	0.022211	0.225176	0.339334	0.181396	0.169761	0.0767	0.096968	0.228825	0.079939	0.062689	-0.30248	-1.23493	-0.39695	-0.82324	0.095645	-0.03783	-0.27062	-0.09169	-0.26343	-0.29512	0.157057	-0.47593	-0.58116	0.102715	0.003615	-0.49188	-0.02201	1.43966	-0.71058	0.035824	-0.72552	-0.55105	-0.2314	-0.39125	-0.98098	-0.24288	-0.09759	-0.97043	-0.13086
3	-0.15889	-0.24325	-0.51886	0.420842	-0.27635	-0.07541	0.29456	-0.16802	0.063531	-0.4347	1.13205	0.059344	-0.32945	1.07648	-0.15349	-0.36501	0.584387	-0.15054	-0.31677	-0.06934	-0.42348	0.179905	-0.34199	-0.14822	-0.01425	-0.2362	-0.13817	0.036719	-0.43203	-0.02883	0.160022	-0.36042	0.003005	0.02256	-0.11368	0.053298	0.259193	-0.49559	-0.16319	0.4317	-0.67725	-0.05715	-0.42001	-0.60099	0.131828	-0.21542	-0.45442	0.20566
5	-0.76483	-0.00202	-0.92935	0.066883	-0.09142	-0.35126	-0.24456	-0.16428	-0.27199	-0.8144	0.518601	-0.28903	-0.78159	0.423841	-0.17351	-0.79842	-0.01994	-0.1331	-0.81183	0.048768	-0.18924	-0.6217	-0.64637	-0.16087	-0.93391	-0.56405	-0.22262	-1.0213	-0.63693	0.00062	-0.97902	0.013912	-0.05167	-0.75569	-0.1485	-0.17017	-0.64624	-0.82144	-0.15178	-0.11237	-0.69675	-0.13987	-0.57903	-0.79261	0.370222	-0.53438	-0.77536	0.201816
7	-1.0367	-1.01414	-0.59305	-0.88785	-0.94741	-0.40897	-1.01854	-1.06208	-0.40457	-0.78237	-0.62508	-0.43064	-0.92547	-0.61392	-0.271	-0.77844	-0.47516	-0.26357	-0.99807	-0.16711	-0.07551	-0.45518	-0.01406	-0.27209	-1.06213	-0.08469	-0.45468	-1.03376	-0.44063	-0.28071	-0.86518	-1.01866	-0.22346	-1.0926	-0.95061	-0.19729	-0.74787	-0.39363	-0.25293	-0.39975	-0.46525	0.108518	-0.12093	-0.11806	0.146789	0.160808	-0.24206	-0.18596
9	-0.43579	-1.00827	-0.31054	1.47296	-0.93427	-0.44544	1.00803	-0.98192	-0.56698	-0.2621	-0.58565	-0.57363	-0.53519	-0.58281	-0.52981	-0.36074	-0.49939	-0.51317	-0.55656	-0.24133	-0.09789	0.525145	-0.17915	-0.51446	-0.82245	1.04849	-0.55598	-0.50354	1.88504	-0.64784	-0.69966	-0.86597	-0.62775	-0.33924	-0.92	-0.40334	-0.63808	0.658855	-0.52208	1.16933	0.576612	-0.37544	-0.71925	0.279123	-0.25096	-0.05227	0.321629	-0.26923

## Sheet: Fig2 suppl 3Bii
Time (sec)	Theta
-9	-0.44633	-0.47362	-0.8795	-0.63974	-0.46157	-1.02219	-0.5809	-0.5225	-1.04096	-0.4423	-0.37571	-1.03765	-0.10582	-0.37055	-1.04623	-0.4011	-0.37444	-1.04356	-0.28382	-0.55959	0.401996	-0.32149	-0.82732	-1.04478	-0.05918	-0.41025	-0.97946	-0.12359	-0.8104	-0.94965	-0.1979	-0.49884	-0.95679	-0.47953	-0.53381	-1.02684	-0.42185	-0.81456	-1.04839	-0.5878	-0.8375	-0.97878	-0.27189	-1.02848	-0.86105	-0.25975	-0.93152	0.37118
-7	-0.72885	-0.56546	-0.97003	-0.48103	-0.55131	-0.91898	-0.57112	-0.62849	-0.92431	-0.6532	-0.37872	-0.92357	-0.66066	-0.38757	-0.94251	-0.60262	-0.39474	-0.94406	-0.59274	-0.60245	-0.29112	-0.62642	-0.78909	-0.9449	-0.62387	-0.81922	-0.99607	-0.80265	-0.85206	-0.94326	-0.88115	-0.63113	-0.94032	-0.7721	-0.62638	-0.96017	-0.49039	-0.61537	-0.94151	-0.69031	-0.52499	-0.94788	-0.9869	-0.6357	-0.83964	-0.90406	-0.70413	0.311241
-5	-0.71309	-0.79626	-0.32946	-0.52127	-0.82851	-0.15779	-0.64059	-0.7921	-0.158	-0.55471	-0.56581	-0.17457	-0.77962	-0.56648	-0.25694	-0.56918	-0.5758	-0.25081	-0.75126	-0.81024	0.644069	-1.03901	-1.04874	-0.2364	-0.63836	-0.21124	-0.33905	-0.81148	-0.05547	-0.15365	-0.85895	-0.8093	-0.13311	-0.71144	-0.80977	-0.18956	-0.96701	-0.35749	-0.25993	-0.58	-0.50793	-0.18888	-0.80122	-0.39786	0.068852	-0.90034	-0.57125	0.637909
-3	-0.06847	-0.92006	-0.54596	-0.77708	-0.90801	-0.26066	-0.78988	-0.83547	-0.27693	-0.21235	-0.7652	-0.29324	-0.28561	-0.76652	-0.34159	-0.25671	-0.76372	-0.32784	-0.4169	-0.75618	-0.09035	-0.93055	-0.66006	-0.32323	-0.01499	0.451638	-0.47454	-0.17822	0.206962	-0.26156	0.022101	-0.86204	-0.27358	0.083006	-0.80398	-0.2778	0.307188	-0.0874	-0.34887	-0.93071	-0.46349	-0.35252	-0.66645	-0.3321	-0.04016	-0.81465	-0.32066	1.35557
-1	-0.71334	-0.56939	-0.27003	-0.86146	-0.64448	-0.10166	-0.83278	-0.593	-0.1033	-0.67381	-0.46422	-0.12593	-0.73574	-0.46992	-0.21748	-0.66292	-0.46517	-0.21824	-0.6748	-0.26582	-1.48176	-0.64998	0.094988	-0.21094	-0.6513	0.928668	-0.34571	-0.69476	0.876833	-0.23397	-0.67548	-0.46952	-0.23958	-0.72781	-0.61448	-0.27116	0.257751	0.768667	-0.22638	-0.73536	0.667593	-0.25486	-0.14811	0.888946	-0.01859	0.100203	0.952948	0.950528
1	1.17753	1.34282	1.27308	1.59524	1.31809	1.16775	1.57609	1.31606	1.06174	1.41837	1.69016	1.05162	1.3697	1.67845	1.09499	1.42562	1.68635	1.08957	1.25785	1.67792	-0.40971	1.48475	1.57588	1.09721	-0.18387	0.850858	1.02619	0.475954	1.20641	0.984189	0.691483	1.44344	0.985583	1.23237	1.2919	0.978285	0.215444	1.73594	1.0869	1.5796	1.72623	0.989681	1.66114	1.49888	1.18082	1.69761	1.27615	-0.78171
3	0.751992	1.63734	1.46592	1.41933	1.68091	1.5139	1.45588	1.66483	1.57121	0.711426	1.3322	1.5873	0.563425	1.33689	1.61482	0.635563	1.3368	1.60569	0.651359	1.28964	0.422265	1.07584	1.16054	1.59027	-0.63153	-0.42207	1.61934	-0.16847	-0.09937	1.51265	-0.16525	1.64878	1.50878	0.752487	1.69627	1.51448	-0.56677	0.52925	1.6222	1.08796	0.709064	1.57276	0.183067	0.689795	1.45217	0.720998	0.756588	-0.91171
5	-0.15277	0.564052	0.495291	-0.1322	0.519374	0.278144	-0.10529	0.573663	0.397745	-0.28691	0.086343	0.431416	-0.09783	0.085635	0.485429	-0.23474	0.086561	0.481195	-0.12144	0.231406	-0.1617	0.412809	0.61943	0.472537	0.204995	0.073971	0.521115	0.197092	-0.0095	0.431222	0.111624	0.483074	0.43441	-0.16551	0.576657	0.4723	-0.28178	-0.10896	0.49659	0.206208	0.095509	0.436264	0.254318	0.196727	-0.09039	0.299196	0.278333	-0.95074
7	0.140046	0.09739	0.201056	0.437689	0.106985	0.042999	0.371724	0.089442	0.021542	-0.09434	0.054413	0.026321	0.057368	0.069894	0.05306	-0.07809	0.069423	0.049701	0.142715	0.281931	0.163178	0.714426	0.113252	0.044817	1.56045	-0.08526	0.0593	1.11942	-0.11827	0.003415	1.02557	0.066834	-0.00031	0.10398	0.082766	0.052292	0.985377	-0.537	0.05146	0.792359	-0.39946	-0.03865	0.615295	-0.46006	-0.61976	0.173011	-0.3497	-0.81605
9	0.745815	-0.31366	-0.436	-0.03911	-0.22918	-0.53616	0.115723	-0.26974	-0.54331	0.780036	-0.60737	-0.53633	0.668097	-0.60379	-0.43916	0.73681	-0.59927	-0.43727	0.781226	-0.48182	0.795183	-0.11919	-0.23652	-0.44018	1.02737	-0.35356	-0.0902	0.976934	-0.34171	-0.38553	0.918766	-0.3676	-0.38127	0.67777	-0.25661	-0.28893	0.952517	-0.50799	-0.4278	-0.14054	-0.46042	-0.2348	0.159168	-0.41599	-0.22995	-0.1111	-0.38294	-0.16456

## Sheet: Fig2 suppl 3Biii
Time (sec)	Theta
-9	0.022794	0.473329	-0.18666	1.9375	0.479721	-0.07917	1.83448	0.62695	-0.02308	0.169732	-0.14409	-0.01862	-0.073	-0.15479	0.058969	0.235462	-0.15832	0.022322	-0.1211	-0.52044	-0.01288	1.60663	-0.96092	0.050021	-0.33817	-0.5552	0.018405	-0.11611	-0.49656	0.023675	-0.00473	0.169704	0.020725	0.183801	0.634746	0.054563	0.251152	-0.97534	0.033917	1.37587	-0.8507	-0.02568	-0.19229	-1.21772	-0.33807	0.268593	-1.17347	-0.87688
-7	0.066291	-0.58893	0.218964	-0.77124	-0.48708	0.347866	-0.55154	-0.60163	0.335606	0.024257	-0.50296	0.322128	-0.67194	-0.52089	0.643049	-0.04206	-0.51268	0.668575	-0.07056	-0.54024	0.762972	-0.95622	-0.50982	0.65514	0.169774	-0.69398	0.320087	0.535919	-0.74489	0.35918	0.381549	-0.50131	0.481581	-0.06318	-0.52716	0.456077	0.429537	-1.11781	0.676063	-0.48444	-1.14464	0.546552	0.019163	-1.29405	0.562871	0.349821	-0.96766	0.53989
-5	0.468941	-0.16086	-0.07693	-0.44582	0.902123	0.213538	-0.27546	-0.12046	0.116764	0.079267	-0.3739	0.106739	-0.07067	-0.35288	0.002828	-0.00028	-0.36521	0.023665	0.259125	-0.77397	-0.30411	-0.31993	-0.68523	-0.00211	0.623773	-0.8135	-0.03655	0.459286	-0.64968	0.050729	0.374047	0.166639	0.169788	0.506966	0.294599	0.150948	0.800167	-1.03027	0.038224	-0.15864	-0.75899	0.128431	0.219696	-0.54286	0.076349	-0.20594	-0.54454	1.61546
-3	0.534866	-0.89399	1.05236	-0.15722	-0.46317	0.958497	-0.08108	-0.89017	0.88029	0.485906	0.055598	0.869647	0.251448	0.076618	0.837106	0.442432	0.060165	0.841192	0.367533	-0.42006	0.508517	-0.82498	-0.4996	0.833307	0.203111	0.23716	0.957695	1.03178	0.197888	1.04038	1.06694	-1.00557	0.973405	0.578532	-1.09362	1.11408	-0.52035	-0.2668	0.875945	-0.23302	-0.14331	0.8052	0.757647	0.086254	0.692933	-0.02031	-0.27312	-0.20735
-1	-0.59091	-0.33918	0.332506	-0.03795	0.074652	0.24334	-0.2094	-0.46033	0.257344	-0.6694	-0.42914	0.258736	-0.33433	-0.43134	0.232921	-0.54669	-0.43792	0.240693	-0.63122	0.020868	-0.53674	-0.17811	0.102346	0.22922	-0.07783	1.19392	0.076342	0.109684	0.890138	0.174026	0.00978	0.214257	0.156891	-0.60881	-0.41899	0.263159	0.989062	0.704921	0.20065	0.117253	0.329155	0.610724	-0.0436	0.706564	0.850626	-0.07766	0.717947	-0.06781
1	-0.87352	-0.06124	-0.52563	-0.10528	-0.42547	-0.28074	-0.34016	-0.26246	-0.17188	-0.38416	0.653085	-0.17703	-0.53051	0.653651	-0.1412	-0.28842	0.657288	-0.15271	-0.58111	0.944505	-0.14668	-0.57788	1.69503	-0.1327	-1.36026	0.860591	-0.50001	-1.11007	0.422482	-0.38618	-1.05411	-0.20205	-0.40635	-0.89362	0.182556	-0.31177	0.239814	0.911466	-0.16492	-0.01247	1.38929	0.028069	-0.3814	0.833395	0.585308	-1.00736	0.44826	0.33676
3	-0.34503	0.652432	-1.11203	-0.18106	0.007935	-1.04407	-0.34824	0.956935	-0.94897	-0.1882	-0.04164	-0.95164	-0.18941	-0.03111	-1.08532	-0.11184	-0.02664	-1.07588	-0.30818	0.2516	0.3338	-0.03438	0.785867	-1.07436	-0.40349	-0.7932	-1.01103	-0.38887	-0.9557	-0.97123	-0.50248	-0.25043	-0.99828	-0.39526	0.796077	-1.10651	-0.49613	0.007503	-1.10945	-0.00878	0.51972	-1.1233	0.053055	0.491645	-1.12133	0.049737	1.03255	-0.41888
5	0.354984	1.15485	-0.48775	-0.50349	0.592961	-0.4399	-0.32705	1.00781	-0.44609	-0.25911	0.312656	-0.44714	0.441152	0.298752	-0.60131	-0.28969	0.291175	-0.61353	0.266819	0.107993	-0.05169	-0.2609	0.028629	-0.59267	0.545512	0.139015	-0.31163	-0.20251	0.018828	-0.39297	-0.19048	0.792548	-0.31656	0.33916	0.882521	-0.40757	-0.89432	0.47968	-0.59428	-0.83698	0.803122	-0.45841	-0.88638	0.10061	-0.46591	-0.37582	-0.05293	-0.12691
7	-0.34967	-0.00758	0.123972	-0.32255	-0.21071	-0.19173	-0.30256	0.061261	-0.24082	-0.02051	0.167154	-0.20814	0.065081	0.160863	-0.3229	-0.08707	0.175749	-0.34081	-0.03931	0.17066	0.234823	0.906225	0.11332	-0.33777	-0.10344	0.913131	-0.1453	-0.60962	1.44978	-0.33533	-0.41549	0.824601	-0.38309	-0.43263	-0.17578	-0.28731	-0.16159	0.828829	-0.33168	-0.45918	-0.1651	-0.62218	-0.13492	0.411477	-0.59683	0.230798	0.637897	-0.35636
9	0.704214	-0.22656	0.654652	0.581289	-0.4663	0.269665	0.595045	-0.31476	0.238444	0.754663	0.300239	0.242892	1.10117	0.298143	0.372133	0.68135	0.313256	0.382661	0.849514	0.751564	-0.78021	0.633213	-0.06893	0.368244	0.733679	-0.48311	0.625737	0.287636	-0.13097	0.433387	0.331655	-0.20633	0.298898	0.777277	-0.56926	0.073583	-0.63103	0.453286	0.371813	0.69344	0.021234	0.109501	0.583193	0.420478	-0.24352	0.780348	0.173325	-0.43359
