# Supplementary material for: Dissociation of impulsive traits by subthalamic metabotropic glutamate receptor 4
Source: eLife. 2022 Jan 4;11:e62123. doi: 10.7554/eLife.62123 (PMC8803315; doi:10.7554/eLife.62123)
Supplement: Figure 2—source data 1. [file elife-62123-fig2-data1.xlsx]

## Sheet: Figure 2Ai
Light onset (sec)	Up							Down
-7	0.0963892	0.045951	0.0823788	-0.0288873	-0.069854	-0.0776705	-0.0540876	0.176281	0.00777737	-0.0187286	0.0956709	-0.00877085	-0.158311	-0.0623138	-0.169029	-0.0139059	0.056044	0.0343294	-0.049339	0.20836	0.0222745	0.345422
-6.75	0.136702	0.0637721	0.162245	-0.00558327	-0.015795	-0.126182	-0.0444782	0.188061	-0.0422716	-0.0371006	0.172786	-0.0313497	-0.145401	0.00665733	-0.140434	-0.0877844	0.0919971	0.0430917	-0.0259392	0.175862	0.0149671	0.487507
-6.5	0.100779	0.0765923	0.227469	-0.0319294	0.0882121	-0.104205	-0.0491442	0.0870104	-0.113609	-0.0781737	0.140412	-0.11357	-0.0675169	-0.029877	-0.132307	-0.173541	0.0133276	-0.0238386	-0.0838058	0.0952435	0.0149671	0.537514
-6.25	0.0796323	0.0635832	0.165269	-0.0721548	0.183962	-0.0560921	-0.0444782	-0.0348861	-0.0852381	-0.130532	0.0260831	-0.191888	-0.0146589	-0.085413	-0.144978	-0.211399	-0.0858237	-0.0978584	-0.111128	0.0433526	0.0295715	0.345797
-6	0.0907621	0.0422508	-0.011628	-0.0697148	0.197416	-0.0102771	-0.0491442	-0.0684906	0.0423547	-0.137714	-0.0653708	-0.206252	0.0182914	-0.0164273	-0.160013	-0.20203	-0.108631	-0.127713	-0.0755024	-0.0464528	-0.0264453	0.0619919
-5.75	0.0347302	-0.00967075	-0.124812	0.00282642	0.117208	-0.000621291	-0.0444782	-0.0478779	0.094159	-0.137002	-0.0772573	-0.162983	0.00908124	0.192821	-0.169027	-0.187782	-0.0519155	-0.0954225	-0.0450552	-0.176531	-0.102393	-0.0666929
-5.5	-0.065002	-0.0624412	-0.135898	0.0704081	0.0243076	-0.00772767	-0.0210892	0.0209717	0.0242331	-0.181052	-0.0685153	-0.0930568	0.00880061	0.336176	-0.17959	-0.20454	-0.0262289	-0.0641704	-0.0891215	-0.215966	-0.136508	-0.0119324
-5.25	-0.0964671	-0.0549714	-0.12816	0.0724883	-0.022709	-0.0390743	0.00697288	0.124834	-0.107694	-0.28306	-0.0904267	-0.0436434	0.0369984	0.327355	-0.166991	-0.230662	-0.046645	-0.0550425	-0.170152	-0.147932	-0.143805	0.129787
-5	-0.0596559	-0.00966824	-0.119396	0.0407396	0.0196126	-0.0657515	-0.0161387	0.132951	-0.216444	-0.355165	-0.117335	-0.0436434	0.0544693	0.244567	-0.116057	-0.242397	-0.0936872	-0.0858311	-0.224851	-0.0158956	-0.0609806	0.234536
-4.75	-0.0326929	-0.0238657	-0.0819319	-0.0143012	0.0929104	-0.0945452	-0.105539	-0.019819	-0.246804	-0.349376	-0.07562	-0.0725481	0.0262844	0.166299	-0.0252197	-0.244906	-0.140119	-0.124644	-0.214917	0.130155	0.0909147	0.271498
-4.5	-0.0656358	-0.0995705	-0.0314903	-0.0490674	0.0905663	-0.135691	-0.152046	-0.188042	-0.216986	-0.293428	-0.00808883	-0.110497	0.0240212	0.0971066	0.141818	-0.244906	-0.149606	-0.13355	-0.141136	0.201436	0.188354	0.241049
-4.25	-0.0686108	-0.11005	-0.00215849	-0.0678694	-0.0203548	-0.181652	-0.12865	-0.223064	-0.17893	-0.254143	-0.0214288	-0.121961	0.0615669	0.0326341	0.325393	-0.230662	-0.135591	-0.135395	-0.0356343	0.139354	0.0909147	0.173262
-4	-0.0732452	-0.047206	-0.0309611	-0.0532277	-0.100705	-0.193715	-0.100588	-0.139557	-0.144119	-0.220238	-0.106356	-0.0930612	0.0554353	-0.0427377	0.356754	-0.20454	-0.101258	-0.115152	-0.00120544	0.00171766	-0.0609806	0.0928159
-3.75	-0.116174	0.0259997	-0.116555	-0.032795	-0.00938652	-0.179099	-0.133594	-0.048266	-0.0914063	-0.164478	-0.162785	-0.0436434	-0.0095604	-0.0818767	0.191603	-0.173538	-0.0194086	-0.0543018	-0.0434917	-0.0707229	-0.129211	0.0315519
-3.5	-0.176913	0.0810761	-0.172174	-0.0320429	0.164363	-0.140793	-0.15699	0.0291826	0.0269315	-0.13573	-0.102186	-0.00262177	-0.0654001	-0.0531874	0.0442528	-0.107196	0.123754	0.0597828	-0.106406	-0.0465164	-0.143805	-0.0488946
-3.25	-0.224594	0.11408	-0.0995757	-0.0157597	0.174839	-0.0996439	-0.100595	0.113125	0.160865	-0.106908	0.0226118	0.00269318	-0.0396032	0.0106337	0.0769693	0.0164179	0.260975	0.18117	-0.0913569	0.00939659	-0.102393	-0.123194
-3	-0.20523	0.0731118	-0.00459602	0.0217615	0.0282402	-0.106604	-0.0210821	0.18295	0.18828	-0.0276498	0.103847	-0.00262177	0.0496262	-0.000230984	0.19533	0.164178	0.266821	0.212576	-0.0362781	0.0381564	-0.0264453	-0.153643
-2.75	-0.0937906	-0.0307483	-0.00361179	0.0143853	-0.0825526	-0.184202	-0.0210821	0.201334	0.145966	0.0773363	0.127924	-0.0200624	0.155165	-0.0520469	0.25034	0.206522	0.227822	0.1984	0.0475525	0.0240881	0.0222745	-0.123194
-2.5	-0.0127856	-0.133285	0.00374326	-0.124778	-0.0714358	-0.251738	-0.105539	0.186944	0.104391	0.132201	0.0929518	-0.0467202	0.213527	-0.0326634	0.233124	0.166544	0.264819	0.228077	0.144115	0.0426198	0.0149671	-0.0554075
-2.25	-0.0173397	-0.232811	0.0894592	-0.269562	-0.044649	-0.273023	-0.152046	0.166754	0.136827	0.139884	0.0948769	-0.0489628	0.179802	0.0659488	0.190783	0.0904336	0.385429	0.325787	0.214682	0.0987307	0.0149671	-0.0119231
-2	-0.0469283	-0.346639	0.172785	-0.270298	-0.109822	-0.297693	-0.100595	0.145047	0.182094	0.125013	0.164505	-0.0610841	0.12054	0.140582	0.160903	0.114295	0.407086	0.354184	0.170435	0.120484	0.0709839	-0.0184453
-1.75	-0.045678	-0.383737	0.131086	-0.142368	-0.205069	-0.324227	-0.0210821	0.099622	0.209416	0.088662	0.22462	-0.0581842	0.149684	0.130949	0.116758	0.18556	0.271998	0.257342	0.0945781	0.110812	0.0909147	0.0185168
-1.5	-0.06549	-0.255012	0.0124663	0.000184307	-0.264774	-0.336146	-0.0210821	0.0444825	0.168396	0.0351552	0.177157	-0.00262615	0.236936	0.12481	0.0468395	0.180939	0.0998755	0.124605	0.0766431	0.104504	0.0636868	0.173262
-1.25	-0.162195	-0.0348174	-0.0912961	0.108793	-0.28749	-0.338695	-0.0774837	0.0053983	0.0761176	0.0167923	0.094896	0.107492	0.270521	0.153442	-0.0687107	0.0333127	-0.0277368	0.0170933	0.0502816	0.0991414	-0.0191483	0.302322
-1	-0.288142	0.0600217	-0.0656716	0.135193	-0.271817	-0.338695	-0.100595	-0.0187236	-0.012121	0.0738713	0.0989752	0.198108	0.222537	0.172483	-0.115053	-0.102321	-0.10907	-0.0660257	-0.0341541	0.0867258	-0.102393	0.314982
-0.75	-0.308596	-0.00504631	0.0335694	0.0712447	-0.220739	-0.324227	-0.0114798	-0.0314781	-0.00140988	0.0872267	0.125108	0.183568	0.193983	0.163604	-0.0605137	-0.0896236	-0.142332	-0.124949	-0.141519	0.0693799	-0.136508	0.197564
-0.5	-0.173931	-0.0958032	0.139979	0.0919825	-0.134254	-0.225351	0.104925	-0.0323442	0.117826	0.0130776	0.144689	0.124924	0.226548	0.171138	-0.0202721	-0.0263144	-0.119387	-0.135546	-0.22878	0.0599613	-0.102393	0.142438
-0.25	-0.0288426	-0.146786	0.248305	0.242388	-0.0383723	-0.0611909	0.26471	-0.0326178	0.220565	-0.0707839	0.151878	0.154659	0.26568	0.146422	-0.0691061	-0.0189221	-0.0290906	-0.079869	-0.235472	0.0938078	0.0149671	0.167115
0	0.00349308	-0.148226	0.340676	0.358553	-0.000617207	0.0334288	0.348386	0.0155296	0.261934	-0.100934	0.0536259	0.186817	0.28928	0.0248035	-0.125473	-0.0928077	0.11692	0.0430046	-0.108765	0.0964533	0.139634	0.173272
0.25	0.00561075	-0.101528	0.342639	0.228515	-0.0407231	-0.0322541	0.321112	0.112517	0.2319	-0.140104	-0.10059	0.0931326	0.249368	-0.124942	-0.142145	-0.159297	0.201651	0.135032	0.0327008	0.0220942	0.139634	0.0558538
0.5	0.106385	0.0412702	0.239296	0.0560094	-0.0582484	-0.140797	0.119755	0.0947347	0.155938	-0.183291	-0.143772	-0.0725525	0.148866	-0.163955	-0.140506	-0.166008	0.135848	0.0981848	0.0500156	-0.0920003	0.0149671	-0.0862315
0.75	0.246918	0.135905	0.169915	0.0374379	0.0126986	-0.12309	-0.0447698	-0.117392	0.0166007	-0.16689	-0.0367196	-0.168307	-0.0197366	-0.0315856	-0.10826	-0.164173	-0.003867	-0.0389454	-0.0366957	-0.179342	-0.0950959	-0.14713
1	0.260984	0.0934114	0.139227	0.0625803	0.12191	-0.0346604	-0.0343139	-0.347888	-0.15712	-0.0621136	0.0259667	-0.139402	-0.145615	0.199352	-0.0443962	-0.130806	-0.0944745	-0.148804	-0.0732498	-0.0955438	-0.136508	-0.160156
1.25	0.149579	0.0271134	0.0280752	0.0593673	0.117346	0.0937049	0.0680334	-0.371549	-0.272146	0.0618522	-0.0138919	-0.0262071	-0.131148	0.329611	-0.0298802	-0.0524408	-0.136438	-0.200169	-0.0516719	0.0498427	-0.143805	-0.160156
1.5	0.0520195	0.0230393	-0.0936353	0.0472357	-0.0140781	0.163388	0.161035	-0.178389	-0.2797	0.0502365	-0.0796873	0.0756963	-0.067707	0.312881	-0.0550278	0.049933	-0.145343	-0.187571	-0.0625133	0.0505822	-0.143805	-0.160156
1.75	0.0415166	0.0714816	-0.1207	0.0724227	-0.133627	0.17571	0.227046	-0.0103264	-0.236084	-0.0491822	-0.122836	0.0756963	-0.0886608	0.235786	-0.0618727	0.116419	-0.12739	-0.123575	-0.10728	-0.0794488	-0.143805	-0.160156
2	0.0398937	0.116251	-0.0818582	0.0974441	-0.149297	0.120522	0.180822	0.037649	-0.183466	-0.129661	-0.138308	0.0117378	-0.209494	0.177403	-0.00442547	0.128153	-0.0911364	-0.0561038	-0.109372	-0.119632	-0.143805	-0.160156
2.25	-0.0193496	0.153331	-0.061026	0.079399	-0.0494858	0.0885952	0.00202243	0.0239377	-0.112503	-0.115192	-0.128595	-0.0405755	-0.323294	0.110069	0.0755021	0.0978295	-0.0432895	-0.0236118	-0.080483	-0.0529811	-0.102393	-0.160156
2.5	-0.0687346	0.155841	-0.040323	0.0610493	0.0615705	0.120522	-0.119048	0.0557053	-0.0386051	-0.0901079	-0.0879266	-0.0663991	-0.325416	0.0422773	0.0739561	0.0214376	-0.00707965	-0.0253142	-0.0606743	-0.0112488	-0.0264453	-0.160156
2.75	-0.03552	0.0972815	0.00754733	0.0503819	0.108452	0.122935	-0.0956519	0.117937	0.00115008	-0.0719565	-0.0793587	-0.110497	-0.218911	0.0282715	0.0118269	-0.0592962	-0.0255335	-0.0577532	-0.081362	-0.0127525	0.0222745	-0.160156
3	0.037333	-0.0345357	-0.00140677	-0.00716934	0.0858613	-0.000621291	-0.0210821	0.0883816	-0.0454846	-0.0268196	-0.117785	-0.128111	-0.0714576	0.000104423	-0.0536756	-0.0971532	-0.0625628	-0.0989453	-0.0773991	-0.0612079	-0.0264453	-0.160156
3.25	0.0589389	-0.199507	-0.139279	-0.0669234	0.0597185	-0.133292	-0.0210821	-0.0470765	-0.198208	0.0422964	-0.165498	-0.0694758	0.0680613	-0.0305863	-0.105495	-0.0785636	-0.083436	-0.113262	-0.0471851	-0.102345	-0.0609806	-0.160156
3.5	0.0169982	-0.260534	-0.204304	-0.0459031	0.0354177	-0.101662	-0.0774837	-0.151091	-0.346843	0.0735383	-0.139211	-0.0116664	0.163093	0.0063238	-0.143762	-0.0331698	-0.105208	-0.115531	-0.0600206	-0.0770531	-0.0191483	-0.160156
3.75	0.0175278	-0.192865	-0.0982229	0.0162103	0.00800364	0.0403848	-0.0725403	-0.110918	-0.364472	0.0260252	-0.0271418	-0.0231304	0.218296	0.0551938	-0.132381	-0.0474139	-0.146316	-0.135289	-0.129222	-0.00177403	0.0636868	-0.160156
4	0.0965963	-0.0924965	0.0534109	0.0581973	0.0776009	0.10847	-0.0161387	-0.0326073	-0.300076	-0.0870993	0.032738	-0.00587969	0.247103	-0.00876677	-0.0744664	-0.12144	-0.183438	-0.15114	-0.139445	0.0173473	0.0909147	-0.123194
4.25	0.149971	-0.0804437	0.0769835	0.0543764	0.190502	-0.00827309	-0.0210821	0.00725623	-0.234916	-0.16462	-0.0416013	0.139465	0.285336	-0.129794	-0.0389641	-0.171032	-0.178215	-0.132858	-0.0654721	-0.0498736	0.0636868	-0.0554075
4.5	0.170162	-0.0935368	-0.0634132	-0.0200251	0.266386	-0.133292	-0.105539	0.0125548	-0.183821	-0.164438	-0.156281	0.312133	0.320952	-0.200436	-0.0321278	-0.182762	-0.148087	-0.107753	0.0148975	-0.176884	0.0636764	-0.0119231
4.75	0.194027	-0.0339967	-0.201792	-0.104653	0.235168	-0.139965	-0.152046	-0.020603	-0.126688	-0.143698	-0.213663	0.27335	0.263293	-0.176616	-0.0296233	-0.190295	-0.123565	-0.104525	0.0284465	-0.31938	0.173739	-0.0554075
5	0.175401	0.0928661	-0.234807	-0.158716	0.18382	-0.0443198	-0.12865	-0.0715461	-0.102265	-0.17304	-0.235481	0.0929514	0.178762	-0.121437	-0.0398543	-0.176051	-0.123093	-0.128336	0.0232605	-0.380709	0.313011	-0.123194
5.25	0.0792557	0.187727	-0.193553	-0.164499	0.142406	0.0574062	-0.0444782	-0.0698416	-0.104696	-0.223489	-0.217364	-0.0397501	0.0977413	-0.0910891	-0.0504893	-0.116417	-0.11898	-0.133766	-0.00834484	-0.319378	0.256994	-0.116681
5.5	0.00105373	0.162976	-0.136167	-0.118054	0.0197511	0.0478935	0.0254185	-0.000557326	-0.0989343	-0.26207	-0.128919	-0.107425	-0.0198002	-0.11776	-0.0320595	-0.0524372	-0.113816	-0.12828	-0.0964207	-0.223198	0.0563794	-0.0554075
5.75	-0.0108274	0.0856283	-0.139564	-0.0247087	-0.140673	-0.0587918	0.0680334	0.0584619	-0.0392171	-0.295746	0.00923233	-0.139398	-0.169709	-0.144873	0.00410208	-0.00719145	-0.102463	-0.101193	-0.15658	-0.163826	-0.0877988	0.025039
6	-0.046964	0.000636488	-0.155018	0.0427896	-0.17608	-0.104208	0.0303619	0.0294077	-0.0108207	-0.336562	0.10826	-0.177347	-0.221181	-0.106629	0.00587734	0.00468365	-0.105905	-0.0929657	-0.165075	-0.105649	-0.136508	0.086303
6.25	-0.174357	-0.0515379	-0.12779	0.0245766	-0.0957299	-0.0749744	-0.0444782	-0.0285358	-0.0836864	-0.367355	0.135605	-0.19496	-0.103559	-0.0501565	0.00370156	0.0380507	-0.126854	-0.10579	-0.171716	-0.00788721	-0.143805	0.203712
6.5	-0.250198	-0.0315841	-0.0891954	0.026048	-0.0140748	-0.0562352	-0.0956519	-0.00732916	-0.158012	-0.343429	0.131029	-0.142475	0.0497038	-0.079312	-0.00395664	0.0736832	-0.154959	-0.144103	-0.184285	0.0712232	-0.0609806	0.345797
6.75	-0.188119	0.0163192	-0.108568	0.0411505	0.0434112	-0.0417705	-0.105539	0.0478432	-0.135062	-0.268932	0.165044	-0.0610797	0.137489	-0.127917	-0.0516348	0.0549563	-0.157237	-0.173063	-0.180358	0.0569394	0.0909147	0.382768
7	-0.0707469	0.00948998	-0.211938	0.0483581	0.113147	-0.010134	-0.0956448	0.10028	-0.0818198	-0.200682	0.200798	-0.0405667	0.165546	-0.0959223	-0.116058	-0.0356868	-0.142701	-0.172223	-0.159802	0.0108615	0.188354	0.278011
7.25	0.0284462	-0.0578062	-0.290036	0.000461571	0.130666	0.0358242	-0.105539	0.122898	-0.0442627	-0.178904	0.22216	-0.0612609	0.123475	-0.0474955	-0.147087	-0.104686	-0.114117	-0.109043	-0.119847	-0.014479	0.132327	0.16674
7.5	0.0604276	-0.103864	-0.155382	-0.0242947	0.0904279	0.0957053	-0.105539	0.127629	-0.0232657	-0.213115	0.236841	-0.0262115	-0.0201367	-0.0203114	-0.132311	-0.0921299	-0.0352866	0.0267764	-0.0602484	0.00755615	0.139204	0.142813
7.75	0.105881	-0.124335	0.0982435	-0.0468023	0.0354177	0.161385	-0.0956448	0.137864	-0.0269979	-0.251876	0.198754	0.0529407	-0.153732	-0.0326201	-0.0895698	-0.0834389	0.0562421	0.125392	0.0234859	0.0859148	0.271588	0.0993381
8	0.119322	-0.0869485	0.223315	-0.0932517	-0.0360282	0.134997	-0.133594	0.129601	-0.0784182	-0.245011	0.155111	0.037747	-0.214498	-0.00577212	-0.079267	-0.102169	0.0696186	0.0880659	0.0538085	0.157386	0.347127	-0.0184453
8.25	0.0603479	-0.00878666	0.124374	-0.112305	-0.0715709	0.0137004	-0.185045	0.0989386	-0.137142	-0.212328	0.0959949	-0.0407479	-0.24683	0.0417479	-0.118491	-0.159153	0.0508408	0.0398413	0.0453807	0.218067	0.291099	-0.116681
8.5	-0.0627074	0.0393664	-0.00879995	-0.0612184	-0.038379	-0.046188	-0.152046	-0.0097505	-0.108561	-0.156646	-0.0207125	-0.0869165	-0.225943	-0.0130941	-0.163339	-0.202174	0.0823998	0.0793934	0.046953	0.198741	0.229756	-0.153643
8.75	-0.160518	0.045257	-0.0757099	0.0245599	0.0174036	-0.0195036	0.00202243	-0.102955	0.0221385	-0.0822734	-0.0993042	-0.0899844	-0.136051	-0.141023	-0.157649	-0.171032	0.137852	0.15002	0.0979988	0.094499	0.154229	-0.160156
9	-0.169012	0.0245703	-0.0714756	0.0520505	0.0150528	-0.0101303	0.198991	-0.0945151	0.149138	0.0193265	-0.101418	-0.0551118	-0.0262683	-0.208752	-0.110296	-0.107048	0.121172	0.146526	0.143961	-0.0271781	0.0563794	-0.123194
9.25	-0.112041	0.0179287	-0.0773303	0.0263104	-0.0430739	-0.0417705	0.278497	-0.0140357	0.201032	0.0859674	-0.096857	-0.0147431	0.0529819	-0.0937006	-0.0850262	-0.0760466	0.0354353	0.0753765	0.102582	-0.0796409	0.0222641	0.0185168
9.5	-0.0730793	0.0385281	-0.0749407	-0.0227488	-0.0801951	-0.0536894	0.19404	0.0370681	0.207497	0.145043	-0.149871	0.0178913	0.0533115	0.0648153	-0.100133	-0.109562	-0.0359716	-0.0115034	0.0187702	-0.0767148	0.0709839	0.197574
9.75	-0.0536049	0.0481998	-0.0448919	-0.0547635	-0.0761341	-0.0315656	0.0449147	0.0477863	0.201598	0.174888	-0.168598	0.00576554	0.0249148	0.116393	-0.117276	-0.14254	-0.0856478	-0.081023	-0.0550448	-0.0674365	0.132327	0.27802
10	-0.0298581	-0.0247523	0.00118449	-0.0441654	0.0125668	-0.0152364	-0.0956519	0.0152002	0.119894	0.18533	-0.104714	0.043538	0.0660029	0.130418	-0.121748	-0.159153	-0.125212	-0.122488	-0.0865503	-0.0797973	0.181047	0.191051
10.25	0.00030377	-0.112938	0.0367622	-0.0166563	0.133016	0.00178501	-0.152046	-0.0402763	0.0204238	0.182403	-0.022376	0.151763	0.125597	0.190681	-0.125401	-0.159294	-0.143503	-0.139426	-0.0498222	-0.0497778	0.188344	0.068514
10.5	-0.00714168	-0.130634	0.0093157	0.0248082	0.17064	0.00943681	-0.12865	-0.0639416	0.00932657	0.18752	-0.0147957	0.195036	0.0981712	0.200316	-0.0977687	-0.147419	-0.107526	-0.113318	0.0350454	0.0356561	0.173739	-0.00541953
10.75	-0.0366417	-0.120848	-0.0407074	0.0353161	0.101535	-0.0152364	-0.0444782	-0.0234311	0.029146	0.170021	-0.0748397	0.131078	0.0171301	0.064389	-0.0239324	-0.104683	-0.0563198	-0.0691845	0.0872387	0.118239	0.188344	-0.0184453
11	-0.0829733	-0.0863053	-0.0288946	0.0418908	0.0219601	0.0212054	0.0254185	-0.00337485	-0.0325573	0.0855155	-0.138558	0.0960194	-0.0359231	-0.0842971	0.0441464	-0.00719503	-0.0419532	-0.0475678	0.0411924	0.0755866	0.188344	0.142438
11.25	-0.104889	-0.0123192	0.00166516	0.0802003	-0.0313332	0.100954	0.0399783	-0.0524529	-0.14328	-0.0542065	-0.214133	0.169199	-0.0410923	-0.174204	0.0843758	0.0996651	-0.0854048	-0.0822151	-0.0426174	0.0386065	0.173739	0.363586
11.5	-0.0332946	0.0130771	0.0138748	0.159828	-0.0628082	0.149322	0.00696584	-0.111409	-0.199088	-0.145777	-0.256311	0.204257	0.062513	-0.22585	0.0935297	0.13569	-0.0985159	-0.0975822	-0.106786	0.105646	0.188344	0.506699
11.75	0.0517339	-0.0669935	-0.00546728	0.212479	-0.0871057	0.0813836	0.0581324	-0.103704	-0.236564	-0.10079	-0.217582	0.124928	0.220224	-0.223678	0.0745436	0.0450505	-0.0652051	-0.0759234	-0.162248	0.155672	0.188344	0.370099
12	0.106739	-0.106858	-0.0645755	0.206274	-0.113886	-0.017244	0.180822	-0.0286638	-0.294194	0.028432	-0.138606	0.0437105	0.344792	-0.154448	-0.00550607	-0.0426866	-0.0470143	-0.062433	-0.192701	0.1334	0.132327	0.135925
12.25	0.137669	-0.0454416	-0.163511	0.154287	-0.129559	-0.106468	0.227046	0.0234209	-0.315101	0.0312444	-0.0521413	0.0271083	0.305279	-0.107551	-0.0815163	-0.0591553	-0.0712983	-0.0874686	-0.204745	0.096053	0.112396	-0.0293559
12.5	0.187502	0.0177982	-0.242935	0.136299	-0.100563	-0.176693	0.161035	0.0436248	-0.239588	-0.0914229	0.0405919	-0.0291071	0.128734	-0.136618	-0.122569	-0.042535	-0.0756624	-0.0858661	-0.149694	0.112397	0.0982117	-0.123194
12.75	0.187197	0.0284085	-0.231005	0.149826	-0.0117307	-0.191169	0.0779202	0.0653383	-0.102472	-0.149576	0.134919	-0.107598	-0.06951	-0.140939	-0.147414	-0.0524408	-0.0576399	-0.0488312	-0.0546117	0.110179	0.0636868	-0.153643
13	0.0834005	0.0711391	-0.140056	0.137802	0.0882155	-0.0444702	-0.0442008	0.101385	-0.020417	-0.0578039	0.180705	-0.13633	-0.188282	-0.123535	-0.143761	-0.0500718	-0.0570258	-0.0091898	0.0193844	0.090105	-0.0191483	-0.123194
13.25	-0.0564085	0.148471	-0.0346151	0.0697536	0.12191	0.214453	-0.128935	0.0729414	0.0231653	0.0546954	0.15606	-0.11357	-0.147668	-0.184067	-0.116057	-0.0139059	-0.0494285	0.018506	0.0200799	0.12687	-0.102393	-0.0554075
13.5	-0.124604	0.137521	0.0131887	-0.0537637	0.077102	0.342423	-0.123707	0.0387119	0.0277065	0.103322	0.110359	-0.0520351	-0.0191655	-0.264805	-0.0874641	0.030662	-0.0276183	0.0143719	-0.000392384	0.187923	-0.136508	0.0620011
13.75	-0.122965	0.0460357	-0.0274484	-0.10831	0.0550169	0.204248	-0.100588	0.0520371	0.0140597	0.0564312	0.0489218	-0.0321794	0.0475835	-0.254797	-0.0561767	0.0618081	0.0172407	0.0147477	0.0440332	0.202402	-0.143805	0.154089
14	-0.0834043	-0.0106094	-0.117808	-0.0275971	0.0755236	0.0431753	-0.105539	0.0843331	-0.0232017	0.0236927	-0.0194988	-0.0376712	-0.05289	-0.193859	-0.00320824	0.0691969	0.0941353	0.0742847	0.139535	0.175385	-0.143805	0.173272
14.25	-0.0193171	-0.00747654	-0.192173	0.0799426	0.0394854	0.00957264	-0.0213737	0.0686195	-0.0663645	0.0261994	-0.0607045	-0.0405755	-0.160835	-0.17851	0.0889177	0.0425371	0.1737	0.170601	0.215333	0.157601	-0.0609806	0.0558538
14.5	0.037575	-0.0267589	-0.199419	0.0613833	-0.0628082	0.0553986	0.170929	0.0493627	-0.118265	0.0306092	-0.0997448	-0.00877085	-0.157768	-0.128538	0.19526	0.02883	0.200337	0.211336	0.183741	0.211478	0.0909147	-0.0862315
14.75	0.0245041	-0.00751347	-0.164797	-0.018815	-0.162619	0.0693179	0.283447	0.042358	-0.14489	0.0101075	-0.143764	0.0847365	-0.0863504	-0.00798468	0.217015	-0.0187848	0.164894	0.170664	0.0610907	0.267842	0.188354	-0.14713
15	-0.0112051	0.0724648	-0.129088	-0.014353	-0.162754	0.0836432	0.165985	0.0527006	-0.118876	0.00515479	-0.121409	0.15401	-0.0331594	0.0882847	0.121494	-0.104683	0.083366	0.079994	-0.0721	0.255999	0.0909147	-0.160156

## Sheet: Figure 2Aii
Go sound onset (sec)	Up													Down
-7	0.155713	-0.345183	-0.274875	-0.507975	-0.254727	0.12865	-0.0834251	0.0835487	0.113556	-0.352883	0.260642	-0.331767	0.260954	0.0799704	0.110096	0.00327186	0.176961	-0.13098	-0.011873	-0.0538832	-0.0951019	-0.102507	-0.224296	0.224477	-0.059875	0.261413	-0.213429	-0.0435559	-0.101951	0.316271	-0.174599	-0.072098	-0.0472171	-0.129886
-6.75	0.118591	-0.35222	-0.0489323	-0.491581	-0.247726	-0.15798	-0.325722	-0.0163536	0.142075	-0.489203	0.367011	-0.361535	0.0598641	0.197647	-0.220172	0.218707	0.131742	-0.258013	-0.0477743	-0.00587156	-0.126417	-0.116356	-0.229161	0.23822	-0.0564779	0.109813	-0.213429	-0.0377608	0.00345301	0.150957	-0.174599	-0.072098	-0.023954	-0.200634
-6.5	0.125755	-0.143749	0.206521	-0.299861	-0.0775694	-0.0669752	-0.387379	-0.105762	0.0683642	-0.491359	0.287065	-0.317058	-0.117669	0.0453981	-0.499159	0.218707	-0.0116621	-0.389804	-0.0528591	-0.0369004	-0.0545397	-0.0559539	-0.234303	0.216695	0.0286797	-0.0682822	-0.185774	0.0264714	0.0684052	0.0886747	-0.174599	0.0115149	0.0412748	-0.2131
-6.25	0.13203	0.0271056	0.19778	-0.0910266	0.0666117	0.241485	-0.2942	-0.103314	-0.00501509	-0.452576	0.0959502	-0.271983	-0.184467	-0.103496	-0.6198	0.00327186	-0.129693	-0.446291	-0.077218	-0.0207202	0.129009	0.0418637	-0.166068	0.119488	0.193611	-0.101928	-0.135057	0.156845	0.0504481	0.102015	-0.174599	-0.00719813	0.0821182	-0.2131
-6	0.0219073	0.0138364	0.0222371	0.0604137	0.10085	0.392406	-0.133287	-0.100949	-0.00565479	-0.432717	-0.123242	-0.249751	-0.196238	-0.181546	-0.589739	-0.186926	-0.175107	-0.389804	-0.133744	0.095157	0.280135	0.0625077	-0.0272581	-0.0365124	0.267874	-0.0680122	-0.102522	0.193374	-0.0349277	-0.000250687	-0.174599	-0.113716	0.0113046	-0.142352
-5.75	-0.0762088	0.00436108	-0.0263865	0.165208	0.134613	0.283479	0.0462865	-0.122921	0.021226	-0.449077	-0.234984	-0.200833	-0.196238	-0.281113	-0.405779	-0.25849	-0.251138	-0.195486	-0.136601	0.194679	0.233622	-0.00805272	0.0520187	-0.209258	0.0818407	-0.046608	-0.135057	0.0889981	-0.0808277	-0.138903	-0.0844138	-0.195278	-0.103607	-0.0126061
-5.5	-0.0317077	0.0843375	0.0515496	0.17493	0.191744	0.0175115	0.2081	-0.117078	0.0657004	-0.465638	-0.231935	-0.143059	-0.196238	-0.417654	-0.108113	-0.2711	-0.406915	0.0109312	-0.0344748	0.11396	0.0722071	-0.10367	0.0189798	-0.329663	-0.163207	-0.0680122	-0.185774	-0.0296267	-0.0601305	-0.201185	0.0809798	-0.243139	-0.177971	0.070625
-5.25	-0.0103579	0.102403	0.025049	0.193487	0.17745	-0.0932146	0.265311	-0.125509	0.0653764	-0.412863	-0.184016	-0.0855752	-0.196238	-0.542629	0.128514	-0.2711	-0.5037	0.113784	0.144219	0.00546858	-0.0868238	-0.184808	-0.0375907	-0.393048	-0.203404	-0.0636974	-0.208556	0.0380572	0.0780138	-0.214507	0.187078	-0.249374	-0.218511	-0.0126061
-5	-0.0392413	-0.0019568	-0.117983	0.27613	0.124877	0.0996059	0.286091	-0.271543	0.0735315	-0.21386	-0.0958848	-0.0793055	-0.196238	-0.581847	0.139795	-0.2711	-0.469388	0.0959911	0.204902	0.0177995	-0.206959	-0.21664	-0.0612983	-0.393042	-0.0445412	0.0270179	-0.213429	0.191197	0.245582	-0.214507	0.0809798	-0.166129	-0.193821	-0.142352
-4.75	0.0129746	-0.0360562	-0.190598	0.285037	0.12143	0.435557	0.31501	-0.428257	0.0547136	-0.0083951	-0.0551244	-0.0871866	-0.196238	-0.574927	0.0086718	-0.2711	-0.411345	0.0347562	0.13853	0.0467674	-0.249169	-0.20438	-0.0446079	-0.33792	0.0852492	0.218334	-0.213429	0.128345	0.362599	-0.214507	-0.0844138	-0.0134417	-0.128289	-0.200634
-4.5	-0.0380794	0.0922265	-0.106577	0.171475	0.204803	0.546359	0.266057	-0.423025	0.0412568	0.0182711	-0.0635534	-0.0547343	-0.196238	-0.627977	-0.0307693	-0.2711	-0.335812	-0.0862451	0.0120369	0.0886938	-0.239985	-0.207549	0.0283597	-0.268508	0.0386679	0.330717	-0.213429	-0.131479	0.420521	-0.138903	-0.158708	0.134703	-0.133569	-0.142352
-4.25	-0.160054	0.291395	0.0334271	0.204571	0.376337	0.45194	0.119676	-0.403454	0.0801134	-0.141024	-0.0822475	0.0570689	-0.196238	-0.621464	0.0464425	-0.235318	-0.163494	-0.126918	-0.0669309	0.192561	-0.232855	-0.237798	0.0919936	-0.205118	-0.0446989	0.287388	-0.213429	-0.306185	0.405869	-0.000250687	-0.174599	0.140938	-0.193821	-0.0126061
-4	-0.179205	0.403061	0.130875	0.393459	0.49922	0.3698	0.0828153	-0.336248	0.194811	-0.226927	-0.0468058	0.137304	-0.196238	-0.470704	0.166257	-0.169696	0.0846248	-0.0338207	-0.035783	0.283981	-0.20177	-0.213559	0.0912475	-0.205124	-0.0939895	0.0884091	-0.213429	-0.215444	0.343237	0.0886936	-0.174599	0.0219417	-0.15857	0.070625
-3.75	-0.0481741	0.362643	0.132664	0.445343	0.413674	0.222122	0.242943	-0.15754	0.274212	-0.146881	-0.00338388	0.104743	-0.196238	-0.274192	0.342653	-0.1276	0.282127	0.0048816	-0.0238603	0.215983	-0.126305	-0.122088	0.0961624	-0.198219	-0.145917	-0.0548045	-0.213429	-0.0581186	0.2353	-0.000250687	-0.174599	-0.0242363	-0.0433549	-0.0126061
-3.5	0.0942139	0.228734	0.0576473	0.268825	0.197119	0.000326075	0.372075	0.136809	0.207099	-0.0777314	0.0625954	0.0338652	-0.196238	-0.209188	0.543257	-0.169696	0.399391	-0.0579933	-0.0127969	0.0592857	-0.0672575	-0.0409455	0.166758	-0.107033	-0.123431	-0.0203752	-0.213429	0.0520076	0.132744	-0.0632993	-0.174599	0.0760382	-0.0133772	-0.142352
-3.25	0.0486681	0.0778838	-0.140709	0.0511846	0.0725334	-0.0344858	0.382014	0.22706	0.102119	-0.12116	0.0306378	0.0485084	-0.196238	-0.281113	0.608275	-0.235318	0.433704	-0.00593381	0.0794664	-0.0531594	-0.0970446	-0.0605239	0.206592	-0.0447633	-0.00810187	0.123304	-0.213429	0.11938	0.169598	0.013071	-0.174599	0.193351	-0.138858	-0.200634
-3	-0.0703911	0.0214352	-0.389826	-0.10833	0.145345	0.0156282	0.419447	0.0255038	0.00546358	-0.157585	-0.0614932	0.0999637	-0.196238	-0.378435	0.486396	-0.264795	0.350234	0.199191	0.175294	-0.0582208	-0.155677	-0.12968	0.114396	-0.0612887	0.0540017	0.178868	-0.213429	0.241615	0.296824	0.0886936	-0.174599	0.253332	-0.273474	-0.2131
-2.75	-0.139465	0.0492014	-0.368027	-0.127156	0.251317	-0.0696583	0.434782	-0.158588	-0.08874	-0.146876	-0.19975	0.107234	-0.196238	-0.470704	0.322683	-0.2711	0.20632	0.366576	0.211812	0.00907151	-0.160867	-0.132335	-0.00991069	-0.0836034	0.117246	0.200008	-0.213429	0.317944	0.385965	-0.000250687	-0.174599	0.157959	-0.238223	-0.2131
-2.5	-0.208978	0.163236	-0.0420843	-0.050857	0.319774	-0.291626	0.331205	-0.0778946	-0.133248	-0.190295	-0.239472	0.21998	-0.196238	-0.496489	0.281739	-0.2711	0.223823	0.205241	0.00875547	0.0373708	-0.126305	-0.082844	-0.0180994	-0.134597	0.252528	0.253736	-0.130464	0.342495	0.346056	-0.138903	-0.0844138	0.0465396	-0.023954	-0.2131
-2.25	-0.381003	0.291513	0.284444	0.0333229	0.287025	-0.437297	0.0831317	0.176827	-0.154966	-0.300304	-0.155569	0.400644	-0.196238	-0.431485	0.404307	-0.235318	0.320869	-0.0583496	-0.206589	-0.0441983	-0.0783815	-0.0394541	0.077196	-0.166527	0.386066	0.209435	0.0216889	0.3886	0.295886	-0.201185	0.0809798	-0.0655045	0.191749	-0.2131
-2	-0.478147	0.417153	0.348042	0.128693	0.230101	-0.39591	-0.0857556	0.418848	-0.175069	-0.359138	-0.0229547	0.517395	-0.196238	-0.281113	0.524494	-0.169696	0.231771	-0.124947	-0.273372	-0.119781	0.0241719	0.0607314	0.0946345	-0.0408784	0.525517	0.135532	0.119294	0.354771	0.230491	-0.214507	0.187078	-0.0662133	0.18646	-0.2131
-1.75	-0.423064	0.482904	0.262226	0.146746	0.195416	-0.277963	-0.126739	0.440586	-0.154048	-0.405658	0.0679163	0.518568	-0.196238	0.0399562	0.478269	-0.091818	-0.053649	-0.120521	-0.160666	-0.0785819	0.215259	0.265174	0.0145277	0.131001	0.611863	0.114392	0.0216889	0.241607	0.181336	-0.0632993	0.0809798	0.0285353	0.00601618	-0.142352
-1.5	-0.251485	0.420008	0.0783095	0.139702	0.148913	-0.140944	-0.192933	0.171328	-0.0984208	-0.488996	0.0445683	0.421685	-0.196238	0.38575	0.27071	-0.068292	-0.272154	-0.155152	-0.0398408	-0.00153161	0.355597	0.396324	-0.0484183	0.232751	0.566742	0.201245	-0.130464	0.209937	0.147273	0.214005	-0.0844138	0.076056	-0.0228393	0.0581413
-1.25	-0.039094	0.240466	-0.277377	0.0571808	0.041065	0.0194099	-0.307208	-0.175519	0.0310107	-0.561641	-0.0566548	0.284047	-0.196238	0.59065	0.0916182	-0.091818	-0.196359	-0.189445	0.0356438	-0.0556053	0.259526	0.271092	-0.0606884	0.165701	0.345868	0.269583	-0.19881	0.352419	0.0912139	0.391894	-0.0685229	-0.0779739	0.216415	0.271119
-1	0.247706	0.0783434	-0.637934	-0.0592956	-0.02124	0.0954803	-0.434914	-0.385132	0.109592	-0.584999	-0.146107	0.156409	-0.129439	0.517227	0.0658691	-0.163391	0.0387059	-0.114827	0.0817065	-0.188531	0.0280518	0.041581	-0.0971109	0.0183838	0.153674	0.253486	-0.213429	0.396923	-0.0144837	0.289609	0.0809798	-0.243498	0.511778	0.271119
-0.75	0.352871	-0.0537443	-0.827289	-0.20608	-0.0361254	0.126285	-0.468434	-0.398688	0.0237478	-0.521918	-0.20634	0.0784458	-0.00693449	0.412606	0.156576	-0.235318	0.105628	-0.0233615	0.189035	-0.260516	-0.0961195	-0.0401964	-0.11976	-0.158038	0.10576	0.0318596	-0.213429	0.209953	-0.0919832	0.150957	0.187078	-0.23067	0.517059	0.0581413
-0.5	0.150306	-0.0670104	-0.74643	-0.319485	-0.0253555	0.237081	-0.38061	-0.136492	-0.0370667	-0.340224	-0.144254	0.141683	0.0716511	0.304124	0.267784	-0.264795	0.0130112	-0.0519437	0.327385	-0.165212	-0.087345	0.0163693	-0.105342	-0.256355	0.173646	-0.246108	-0.213429	-0.0656404	-0.097632	0.115337	0.0809798	-0.142856	0.205854	0.0116084
-0.25	-0.0923135	0.305349	-0.278387	-0.112774	0.247154	0.555948	-0.0811472	0.572838	0.273978	-0.0251577	0.133271	0.445973	0.0598641	-0.0519147	0.296549	-0.2711	0.0088175	-0.223729	0.267574	0.0279695	-0.0452385	0.0926633	-0.13185	-0.278432	0.2268	-0.374796	-0.213429	-0.187577	-0.0763373	0.075353	0.00577118	-0.142856	-0.0475286	0.200354
0	-0.0696898	0.984876	0.434966	0.430303	0.765917	0.845534	0.254629	1.52353	0.76703	0.18731	0.389978	0.775693	0.0598641	-0.418062	0.214073	-0.2711	0.10682	-0.383763	-0.0526954	0.0575753	-0.0418853	0.104488	-0.264384	-0.358336	0.21399	-0.380604	-0.213429	-0.114217	-0.0862383	0.075353	0.0968707	-0.249374	-0.117734	0.35435
0.25	0.158478	1.42087	0.830188	0.856097	1.09432	0.697737	0.437076	2.06934	0.868226	0.0745504	0.347694	0.702281	0.283817	-0.482678	0.0313326	-0.2711	-0.0116495	-0.412006	-0.381511	-0.219848	-0.0601334	0.0597615	-0.428897	-0.412581	0.125578	-0.241523	-0.185774	-0.0375765	-0.107402	0.102015	0.187078	-0.237264	-0.0736291	0.187888
0.5	0.364691	1.22289	0.666048	0.828186	0.915357	0.22117	0.395173	1.81755	0.669045	-0.233729	0.0210696	0.40979	0.560975	-0.274202	-0.128656	-0.2711	-0.340255	-0.292645	-0.413799	-0.648049	-0.10559	-0.043605	-0.459652	-0.314496	-0.000953882	-0.0814898	-0.135057	-0.146046	-0.167719	-0.000250687	0.0809798	-0.0425905	-0.0133847	-0.071605
0.75	0.399163	0.763422	0.396194	0.688442	0.647223	-0.0409022	0.338388	1.16799	0.578416	-0.415427	-0.231884	0.319374	0.674227	-0.0519048	-0.254637	-0.235318	-0.506951	-0.0579933	-0.144199	-0.887779	-0.190648	-0.152	-0.360838	-0.0378591	-0.140413	0.00994805	-0.102522	-0.261382	-0.290449	-0.138903	-0.0844138	0.140947	-0.0186656	-0.188168
1	0.426729	0.580007	0.427794	0.747833	0.639303	0.0125131	0.406751	0.75871	0.647413	-0.391858	-0.289204	0.385745	0.383442	0.0265328	-0.332588	-0.169696	-0.402479	0.176659	0.226416	-0.859639	-0.251109	-0.19539	-0.308475	0.248399	-0.256961	-0.0509292	-0.107401	-0.319771	-0.434061	-0.125581	-0.158708	0.0930764	-0.038378	-0.2131
1.25	0.442379	0.583535	0.523371	0.678411	0.653571	0.0600988	0.538481	0.730053	0.638404	-0.28044	-0.250284	0.309569	0.00415834	-0.0519147	-0.400982	-0.1276	-0.209401	0.410954	0.522767	-0.72055	-0.269246	-0.193798	-0.392667	0.342118	-0.315163	-0.141908	-0.107401	-0.377	-0.529083	-0.000250687	-0.174599	-0.0783328	-0.0486433	-0.2131
1.5	0.338081	0.523534	0.348039	0.299998	0.4858	0.0460102	0.677185	0.763391	0.602877	-0.144518	-0.110007	0.147718	-0.0941283	-0.142715	-0.386065	-0.169696	-0.0166029	0.674188	0.758259	-0.569119	-0.277008	-0.209137	-0.450287	0.231862	-0.282847	-0.189038	-0.0976486	-0.354932	-0.549527	0.0886936	-0.174599	-0.153659	0.056821	-0.2131
1.75	0.0488042	0.478222	0.189214	0.15679	0.298336	0.26387	0.658407	0.64806	0.575338	-0.0543731	0.098498	0.0565399	-0.00693449	-0.202287	-0.266098	-0.199536	0.138474	0.932674	0.932275	-0.407195	-0.277008	-0.210815	-0.377203	0.163328	-0.140559	-0.16789	-0.0797464	-0.148393	-0.515104	-0.000250687	-0.174599	-0.178248	0.296068	-0.2131
2	-0.0473681	0.637798	0.328419	0.488125	0.332111	0.530813	0.547157	0.454332	0.446002	-0.0648808	0.262483	0.0839678	0.0716511	-0.188844	-0.196706	-0.163391	0.287512	0.943472	1.14387	-0.280956	-0.273125	-0.142912	-0.242831	0.205407	-0.0166984	-0.0985793	-0.0290287	0.0186846	-0.517469	-0.0632993	-0.174599	-0.207747	0.631659	-0.2131
2.25	0.14372	0.79072	0.692055	0.887658	0.400728	0.567605	0.468559	0.242703	0.15475	-0.0580837	0.232123	0.0705804	-0.00693449	-0.0777102	-0.221581	-0.056036	0.310786	0.663738	1.25692	-0.303872	-0.265999	-0.0515294	-0.158071	0.361413	0.016186	0.0619063	0.123879	-0.00770094	-0.586522	0.013071	-0.174599	-0.278523	0.956962	-0.142352
2.5	0.489104	0.582263	1.01212	0.912379	0.163838	0.429138	0.557413	0.0800583	-0.0752919	0.0649777	0.238176	-0.0188057	-0.129439	0.130756	-0.233295	0.104676	0.341106	0.200814	1.28303	-0.379857	-0.234798	-0.0170427	-0.10509	0.448703	-0.0266865	0.278482	0.339772	-0.0923122	-0.642378	0.0886936	-0.174599	-0.314265	1.25585	-0.0126061
2.75	0.672714	0.0905318	1.00146	0.531546	-0.256909	0.304673	0.615102	0.0208823	-0.100361	0.190603	0.351504	-0.0756782	-0.184467	0.394139	-0.19447	0.290271	0.304564	-0.205954	1.33556	-0.431644	-0.164744	-0.0304618	-0.0750634	0.357279	-0.064506	0.56915	0.57594	-0.0259992	-0.589952	0.075353	-0.174599	-0.207756	1.43803	0.070625
3	0.650055	-0.251266	0.83503	0.0182955	-0.502082	0.221541	0.465672	-0.0228218	0.0063028	0.177546	0.386841	-0.0858064	-0.196238	0.517237	-0.243272	0.39798	0.201634	-0.36564	1.42122	-0.427302	-0.0750256	-0.0245503	-0.103792	0.345991	-0.0670306	0.811972	0.737551	0.0915088	-0.490172	0.075353	-0.174599	-0.00719813	1.17296	0.0581413
3.25	0.634082	-0.30812	0.712219	-0.205848	-0.538923	0.150723	0.200735	-0.137609	0.139304	0.0381152	0.29738	-0.138021	-0.196238	0.648327	-0.38294	0.349579	0.194457	-0.320888	1.38641	-0.417265	0.00227003	0.00887293	-0.12484	0.636134	-0.0241619	0.877427	0.745988	0.17893	-0.457078	0.177619	-0.0844138	0.170087	0.576673	0.128889
3.5	0.647868	-0.417492	0.564967	-0.0449552	-0.685466	0.0559429	-0.0331416	-0.26023	0.220171	-0.0510852	0.17184	-0.244902	-0.129439	0.806395	-0.521289	0.416169	0.178172	-0.223721	1.11743	-0.422876	-0.00291696	-0.0212826	-0.0168715	0.952092	0.0493707	0.647881	0.600312	0.207941	-0.455975	0.289609	0.171165	0.334885	0.162863	0.354332
3.75	0.641978	-0.836578	0.210571	0.0361562	-1.04113	0.00504857	-0.223401	-0.251736	0.321247	-0.0473795	0.153953	-0.297938	-0.00693449	0.930584	-0.576385	0.695868	-0.0370888	-0.223721	0.742255	-0.306583	-0.104286	-0.113184	0.112806	1.01501	0.0923934	0.248888	0.276018	0.173126	-0.401236	0.454157	0.442657	0.477145	0.0782485	0.471612
4	0.459034	-1.22263	-0.0853912	0.0231803	-1.34849	0.0758722	-0.385365	-0.189269	0.387758	-0.0380182	0.226556	-0.305742	0.0716511	0.903708	-0.513257	1.11511	-0.255849	-0.326929	0.481376	-0.0834503	-0.19595	-0.175814	0.118089	0.795611	0.0672292	-0.0453911	0.0406198	0.0981132	-0.305601	0.606131	0.442657	0.430976	0.0715489	0.341866
4.25	0.272939	-1.35748	-0.195201	0.050818	-1.46483	0.207197	-0.517825	-0.159112	0.295312	-0.0613815	0.256398	-0.325023	-0.00693449	0.708694	-0.381988	1.32917	-0.242278	-0.383763	0.355512	0.0402429	-0.225096	-0.202795	0.0351765	0.593165	-0.0115066	-0.0591258	0.0831811	-0.0435559	-0.273048	0.592809	0.171165	0.128451	0.0113046	0.0706073
4.5	0.229257	-1.45066	-0.342836	0.0548372	-1.53407	0.162619	-0.598888	-0.16249	0.131977	-0.130516	0.133132	-0.321596	-0.129439	0.322592	-0.292279	1.37054	-0.154353	-0.320888	0.213268	-0.0164463	-0.230916	-0.225632	-0.00373539	0.433518	-0.0466513	0.14038	0.210969	-0.134464	-0.281228	0.391875	-0.0685229	-0.0246039	-0.0930375	-0.129886
4.75	0.210332	-1.58324	-0.400747	-0.0117047	-1.62591	-0.121872	-0.591381	-0.179967	0.100322	-0.246579	-0.0204346	-0.327179	-0.117669	0.0722448	-0.253964	1.474	-0.163488	-0.189437	0.0984634	-0.155623	-0.245808	-0.245208	-0.053342	0.307163	-0.0543716	0.231109	0.280632	-0.0855362	-0.277055	0.0886747	-0.158708	0.0826318	-0.218511	-0.200634
5	0.119458	-1.62784	-0.218766	0.0267024	-1.68031	-0.443003	-0.538917	-0.13571	0.117284	-0.293507	-0.157321	-0.299771	0.0598641	0.211448	-0.19049	1.69367	-0.193115	-0.126562	-0.0468464	-0.280518	-0.229087	-0.238955	-0.13422	0.271805	-0.00378258	0.109556	0.266272	-0.0662613	-0.247996	-0.125581	-0.174599	0.211714	-0.243504	-0.2131
5.25	-0.105133	-1.53208	0.207913	0.211082	-1.66094	-0.567915	-0.528819	-0.0712288	0.0152917	-0.1903	-0.222554	-0.230595	0.260954	0.426845	-0.0775218	2.02276	-0.0450252	-0.189437	-0.20703	-0.425459	-0.159448	-0.201729	-0.151527	0.385958	0.0845116	-0.0206386	0.335935	-0.151374	-0.178747	-0.201185	0.00577118	0.187107	-0.133577	-0.2131
5.5	-0.254124	-1.47719	0.517228	0.287893	-1.63541	-0.567661	-0.552672	0.0320937	-0.0699737	-0.0940912	-0.262554	-0.151023	0.260954	0.359964	0.0376511	2.39853	0.126612	-0.286604	-0.171133	-0.461524	-0.0601306	-0.131171	-0.149527	0.428281	0.161149	0.0756409	0.414868	-0.247105	-0.0658647	-0.214507	0.336558	0.182198	0.016593	-0.2131
5.75	-0.117	-1.55084	0.405624	0.200805	-1.63002	-0.564914	-0.564776	0.127065	1.19955e-06	-0.124659	-0.246515	-0.20529	0.0598641	0.197229	0.0848641	2.60171	0.189785	-0.320888	0.0437288	-0.273677	-0.0288187	-0.0918363	-0.1825	0.346009	0.107723	0.261663	0.359004	-0.306	0.0251989	-0.214507	0.548756	0.176672	0.0362978	-0.142352
6	0.205083	-1.63631	-0.0923334	-0.0944854	-1.56384	-0.445824	-0.619826	0.198112	0.114062	-0.217163	-0.158533	-0.374289	-0.0508701	0.158398	0.0495938	2.3943	0.0804311	-0.177702	0.211212	0.099856	-0.0932737	-0.131171	-0.203468	0.16681	0.0160245	0.304478	0.192773	-0.342995	0.0248939	-0.214507	0.336558	0.0698124	-0.0436589	-0.0126061
6.25	0.427201	-1.54609	-0.421108	-0.452306	-1.39175	-0.17453	-0.654092	0.230614	0.0916603	-0.315714	-0.0542361	-0.506211	0.00483572	0.315293	0.00710059	1.80768	-0.0998169	0.0959911	0.140766	0.415061	-0.175759	-0.19115	-0.204808	-0.0133145	-0.0133089	0.166363	0.0685623	-0.290062	-0.112283	-0.214507	0.0959562	-0.101247	-0.0683557	0.070625
6.5	0.339435	-1.31689	-0.464203	-0.780203	-1.19935	0.0532476	-0.554682	0.23949	-0.012208	-0.449082	0.0460097	-0.519043	0.0716511	0.44571	0.0778469	1.27118	-0.267456	0.388769	0.01379	0.544641	-0.149969	-0.156329	-0.248945	-0.130474	-0.0643482	-0.0160539	0.0181251	-0.0268043	-0.184909	-0.214507	0.293132	-0.172373	-0.0133847	0.0581413
6.75	0.130857	-1.00369	-0.293116	-0.794881	-0.981225	0.165816	-0.409047	0.223763	-0.0750505	-0.525422	0.0717682	-0.442551	-0.00693449	0.426447	0.1703	1.0873	-0.235108	0.474177	0.0851558	0.531796	-0.0417736	-0.0546124	-0.260964	-0.111405	-0.176276	-0.0805234	0.0262814	0.238344	-0.0498924	-0.138903	0.698236	-0.0242363	-0.00809634	0.0581413
7	0.0551722	-0.742959	-0.0746825	-0.528684	-0.758508	0.213017	-0.377846	0.0777347	-0.0738764	-0.379203	0.0459247	-0.386072	-0.0626403	0.341069	0.132386	1.12004	0.0638772	0.37667	0.240807	0.43299	0.0301172	0.0236967	-0.192536	-0.00180071	-0.244459	-0.0894164	0.169717	0.263876	0.187083	-0.000250687	0.804334	0.157967	-0.108888	0.083091
7.25	0.0714317	-0.631079	0.02708	-0.2172	-0.629805	0.167213	-0.456168	-0.093899	0.0251912	-0.0950412	-0.00307962	-0.395483	0.00483572	0.419517	0.0640644	1.19334	0.337187	0.269391	0.26741	0.35263	-0.032704	-0.000551865	-0.0681446	0.138789	-0.226447	-0.12024	0.354405	0.0294526	0.312904	0.164297	0.426743	0.17633	-0.15857	0.0581413
7.5	0.151011	-0.575877	-0.104647	-0.112564	-0.585159	0.0351895	-0.510476	-0.159937	0.152969	0.101418	-0.0125587	-0.408718	0.0716511	0.591028	0.0692771	1.00179	0.269067	0.251259	0.16528	0.334379	-0.0896198	-0.0141511	0.00839615	0.216695	-0.145913	-0.120247	0.409722	-0.170654	0.221913	0.289609	0.0216622	-0.00720701	-0.123008	0.0581413
7.75	0.245369	-0.498635	-0.303656	-0.269684	-0.549888	-0.0312481	-0.455426	-0.122692	0.177239	0.00795973	-0.0482238	-0.288108	0.0598641	0.602595	0.14986	0.636198	-0.00773003	0.388752	0.0843875	0.285633	-0.0542047	0.0344495	0.0404097	0.166591	-0.047216	-0.0420298	0.326463	-0.184248	0.00554575	0.378553	-0.142817	-0.136989	-0.103599	0.083091
8	0.307581	-0.353193	-0.414836	-0.428994	-0.414693	0.00587267	-0.370346	-0.0518471	0.106681	-0.217364	-0.113463	-0.130881	0.126663	0.569879	0.274344	0.363883	-0.137131	0.520552	0.128067	0.17201	-0.0120955	0.0523564	0.0410572	-0.0406408	0.00903423	0.0361874	0.225308	-0.0974609	-0.0941607	0.391875	-0.174599	-0.124152	-0.138858	-0.0126061
8.25	0.253249	-0.234555	-0.398332	-0.458936	-0.277453	-0.0173398	-0.263153	-0.0404153	0.0685217	-0.325282	-0.104552	-0.0801318	0.272724	0.701764	0.417906	0.129904	-0.0370951	0.48592	0.240639	0.235189	-0.0749139	-0.0456179	0.0120689	-0.256361	-0.0445412	0.00104207	0.129033	-0.00455245	-0.0426245	0.289609	-0.174599	-0.0720892	-0.153282	-0.142352
8.5	0.193061	-0.0526554	-0.226224	-0.296163	-0.11857	-0.0656494	-0.182681	-0.0808781	0.124713	-0.276946	0.0566833	-0.118735	0.327753	0.806405	0.491385	-0.056045	0.072769	0.348418	0.36159	0.481128	-0.186877	-0.166908	-0.0812316	-0.255246	-0.143238	-0.0636974	-0.0241558	0.114055	0.00311955	0.177619	-0.174599	0.0219417	-0.103607	-0.200634
8.75	0.277777	0.108388	0.00132004	-0.135321	-0.0391791	-0.0453581	-0.0993364	-0.160356	0.163748	-0.157374	0.194233	-0.086314	0.249167	0.655645	0.442812	-0.121304	-0.0667029	0.297634	0.340852	0.637148	-0.190242	-0.199721	-0.161714	-0.0998912	-0.178233	-0.0420363	-0.125591	0.199169	0.0156867	0.013071	-0.174599	0.211705	-0.0186656	-0.2131
9	0.392862	0.248002	0.0920479	-0.0520446	0.0660196	0.0415967	-0.083267	-0.25375	0.111586	-0.150371	0.211496	0.035051	0.217019	0.262631	0.327232	-0.121295	-0.310641	0.257657	0.0578006	0.4638	-0.0548375	-0.140168	-0.193878	0.0175123	-0.133258	0.010205	-0.125311	0.154035	0.0673397	-0.138903	-0.174599	0.306104	0.0218739	-0.142352
9.25	0.379574	0.407351	0.0821625	0.163194	0.228511	0.110163	-0.171992	-0.323437	-0.00206863	-0.323663	0.25456	0.209978	0.194139	-0.128894	0.271227	-0.133914	-0.359804	0.0855405	-0.24442	0.190612	0.151448	-0.0452766	-0.21224	-0.068193	-0.0822029	-0.0894098	-0.102522	0.0322622	0.100989	-0.201185	-0.174599	0.240854	-0.023954	-0.0126061
9.5	0.351543	0.509321	0.116393	0.470884	0.37017	0.133783	-0.312555	-0.284127	-0.115555	-0.415624	0.279475	0.281074	0.13845	-0.332316	0.309917	-0.133914	-0.234591	-0.0805517	-0.270851	0.0985022	0.229854	-0.0127161	-0.220471	-0.307348	-0.1279	-0.276675	-0.0244362	0.00720069	0.0170892	-0.214507	-0.174599	0.134686	-0.038378	0.070625
9.75	0.495197	0.37723	0.10345	0.535853	0.366956	0.142892	-0.395621	-0.200819	-0.147199	-0.309666	0.102737	0.193545	0.00483572	-0.202685	0.31658	-0.0855131	-0.112871	-0.0519609	-0.106049	0.0358982	0.180594	0.00551851	-0.241026	-0.466594	-0.209469	-0.319483	0.210682	0.0782089	-0.0396329	-0.138903	-0.174599	0.0822818	-0.0380741	-0.0126061
10	0.561132	0.0310219	-0.00400433	0.223503	0.158094	0.0738663	-0.413814	-0.0566545	-0.0319164	-0.117651	-0.0320589	0.0313338	-0.129439	0.158418	0.196042	0.00327186	-0.112877	0.166199	0.0188869	-0.0787654	0.0853743	0.0656707	-0.256007	-0.455317	-0.165727	-0.232097	0.470193	0.128165	0.0886923	-0.000250687	-0.0844138	-0.0301122	-0.0736291	-0.142352
10.25	0.411998	-0.287707	-0.0563379	-0.157897	-0.125914	-0.00918102	-0.409209	0.089835	0.162935	-0.0845335	0.0469418	-0.0182845	-0.184467	0.327665	0.00241656	0.218335	-0.188672	0.330643	0.0864761	-0.171208	0.0209276	0.127239	-0.260873	-0.307342	-0.024008	-0.207351	0.488095	0.266497	0.30856	0.0886936	0.171165	-0.178607	-0.103607	-0.200634
10.5	0.0994478	-0.389786	-0.0933724	-0.395529	-0.371634	-0.0389569	-0.354163	0.0661956	0.2086	-0.237218	0.191843	0.0628115	-0.129439	0.216114	-0.12275	0.570948	-0.246708	0.38272	0.11762	-0.144661	0.0267474	0.113913	-0.287604	-0.11529	0.0870439	-0.177053	0.289055	0.458803	0.352684	-0.000250687	0.442657	-0.236905	-0.0983184	-0.2131
10.75	-0.164458	-0.329025	-0.120263	-0.355519	-0.537102	-0.00277984	-0.289441	-0.0486	0.1495	-0.402365	0.321451	0.154326	-0.00693449	0.118782	-0.0802449	0.839386	-0.305943	0.326225	0.0703238	-0.0298285	0.0407062	0.0248445	-0.32706	-0.0141859	0.107573	-0.0374516	0.110843	0.462435	0.147638	-0.0632993	0.442657	-0.236896	-0.128289	-0.2131
11	-0.245949	-0.255867	-0.026508	-0.185074	-0.607968	0.125823	-0.216198	-0.0171324	0.171567	-0.45864	0.406163	0.169165	0.0716511	0.158408	0.0934429	0.857947	-0.331376	0.210934	0.0224999	0.0164671	0.0928129	0.00594202	-0.317268	-0.00203242	0.0645506	0.105242	-0.0144099	0.209941	-0.0120021	0.013071	0.171165	-0.284758	-0.193821	-0.2131
11.25	-0.201964	-0.272821	0.0184668	-0.0271949	-0.557569	0.24743	-0.167083	0.104748	0.277957	-0.425719	0.391945	0.0882429	0.0598641	0.236856	0.353145	0.708124	-0.33112	0.131907	-0.0251685	-0.0127797	0.136244	0.0567674	-0.237732	-0.0447692	0.0242065	0.157206	-0.0797464	0.0181487	-0.0022751	0.164297	-0.0685229	-0.349649	-0.18854	-0.2131
11.5	-0.105277	-0.300587	-0.112793	0.0410202	-0.418571	0.157253	-0.0965878	0.114059	0.264725	-0.33672	0.253505	0.0214929	0.0598641	0.170373	0.600018	0.655121	-0.276578	0.119816	-0.0241918	-0.0945148	0.195486	0.130228	-0.192603	-0.0918661	0.0242065	0.131218	-0.0927757	-0.0137271	0.122134	0.214005	-0.158708	-0.30803	-0.0683482	-0.2131
11.75	0.0413452	-0.329028	-0.24782	0.0196466	-0.327961	-0.165152	-0.0364704	-0.00814013	0.11533	-0.197299	0.149627	0.0154879	0.0834213	0.0145682	0.828454	0.733362	-0.172118	0.210934	0.149136	-0.064591	0.190102	0.149643	-0.211365	-0.158027	0.0493707	0.0407656	-0.135057	-0.106241	0.233101	0.164297	-0.174599	-0.113716	0.066268	-0.2131
12	0.170751	-0.333569	-0.059372	0.0133648	-0.32546	-0.311476	-0.0393733	0.0393636	-0.0154012	-0.0812356	0.183379	0.119355	-0.00693449	-0.234595	0.945286	0.702191	-0.0536363	0.326233	0.330238	0.0216214	0.0904607	0.0942481	-0.214856	-0.224662	0.0368694	-0.111084	-0.185774	-0.205292	0.350147	0.0886747	-0.174599	0.09932	0.131497	-0.2131
12.25	0.208269	-0.341217	0.27237	-0.0435395	-0.432194	-0.202184	-0.109284	0.352801	-0.00681113	-0.0415175	0.265627	0.26305	-0.129439	-0.418052	0.960379	0.517945	-0.0874442	0.279859	0.240043	0.0752304	-0.0264747	-0.0240311	-0.138116	-0.260251	-0.036667	-0.250429	-0.208556	-0.229206	0.420323	0.075353	-0.174599	0.134703	0.101519	-0.2131
12.5	0.0961221	-0.376011	0.371653	-0.170064	-0.581047	-0.0475942	-0.249994	0.623856	0.168405	-0.0415225	0.361076	0.331505	-0.117669	-0.456883	0.962177	0.33234	-0.239283	0.0794909	-0.0338702	0.0618893	-0.102349	-0.155081	-0.0567527	-0.220528	-0.115403	-0.310314	-0.213429	-0.267001	0.391562	0.102015	-0.174599	0.0573252	0.0165855	-0.142352
12.75	-0.0449919	-0.433258	0.283677	-0.253883	-0.646562	0.0267853	-0.361674	0.626553	0.46654	-0.0543781	0.4027	0.339108	-0.00693449	-0.431475	1.02045	0.403913	-0.318067	-0.0341769	-0.219574	0.112467	-0.125781	-0.232616	-0.0129752	-0.213149	-0.16557	-0.371441	-0.185774	-0.270158	0.237883	-0.000250687	-0.0844138	0.0760382	-0.0930375	-0.0126061
13	-0.0676231	-0.442962	0.127798	-0.143243	-0.664295	0.103642	-0.377861	0.516452	0.644189	-0.0907983	0.310941	0.3306	0.0716511	-0.424565	1.10234	0.727057	-0.305943	0.0451982	-0.185033	0.199733	-0.177585	-0.267528	0.0603324	-0.279779	-0.213942	-0.458815	-0.135057	-0.176269	0.0909866	-0.138903	0.0809798	0.147173	-0.218511	0.070625
13.25	0.0266021	-0.368001	-0.10873	0.0702156	-0.602579	0.177299	-0.226458	0.447476	0.603286	-0.180742	0.183874	0.324584	-0.00693449	-0.438395	1.07275	0.905008	-0.255581	0.223033	-0.0308538	0.243542	-0.254989	-0.272283	0.162917	-0.337926	-0.239828	-0.466742	-0.102522	-0.0664328	0.117316	-0.201185	0.187078	0.163843	-0.303444	-0.0126061
13.5	0.191304	-0.197518	-0.275363	0.267308	-0.42519	0.0917926	-0.0629093	0.312457	0.478118	-0.239777	0.165101	0.24787	-0.129439	-0.346127	1.00584	0.720761	-0.264205	0.21129	0.00290647	0.29946	-0.192293	-0.175994	0.163335	-0.307348	-0.120184	-0.32864	-0.135057	-0.0244525	0.240329	-0.214507	0.0809798	0.134695	-0.303444	-0.142352
13.75	0.279143	-0.027778	-0.287423	0.254827	-0.227675	-0.0393249	0.0542276	0.148773	0.511626	-0.237027	0.237538	0.152883	-0.184467	-0.12384	1.00131	0.260776	-0.301755	-0.0237092	-0.0424043	0.323326	0.0828016	0.0815556	-0.00719677	-0.200989	0.0845154	-0.129133	-0.185774	-0.0296139	0.210829	-0.214507	-0.0844138	0.0822818	-0.223791	-0.059139
14	0.400135	0.00606498	-0.277371	0.024951	-0.15243	-0.0453611	0.0621978	0.0497888	0.624434	-0.193794	0.313351	0.228408	-0.196238	0.0984577	0.967897	-0.109057	-0.360741	-0.240238	-0.0365593	0.308314	0.426958	0.431783	-0.146168	-0.142854	0.257017	-0.0894033	-0.180901	0.00421951	0.0990294	-0.138903	-0.158708	0.0281765	-0.133569	0.187888
14.25	0.459185	0.0366422	-0.28435	-0.0234078	-0.0687446	0.0380317	0.0026684	0.113812	0.676044	-0.186796	0.35442	0.345311	-0.129439	0.190726	0.747108	-0.24588	-0.373107	-0.280563	0.0787022	0.373089	0.524027	0.600154	-0.12911	-0.151117	0.297503	-0.285568	-0.135057	0.145079	0.0547583	0.075353	-0.174599	0.0344201	-0.103599	0.35435
14.5	0.409373	0.151286	-0.251489	0.195821	0.096138	0.0232203	-0.0494867	0.278596	0.665522	-0.247524	0.350872	0.339104	-0.00693449	0.059229	0.478248	-0.2711	-0.335563	-0.149111	0.214048	0.478619	0.356672	0.443517	-0.0359024	-0.0797126	0.223971	-0.341414	-0.102522	0.286924	0.0450659	0.30295	-0.0844138	0.0468984	-0.0789175	0.187888
14.75	0.239057	0.224571	-0.171417	0.382883	0.179516	-0.0561393	0.00741935	0.293521	0.590662	-0.279495	0.282068	0.19564	0.0716511	-0.064277	0.365107	-0.2711	-0.23484	0.0734499	0.20551	0.506276	0.126165	0.139731	0.00208832	0.0797644	0.141326	-0.0894229	-0.135057	0.233011	-0.0337418	0.30295	0.171165	-0.0488252	-0.0133847	-0.000857565
15	-0.00859706	0.164925	-0.070512	0.345187	0.140118	-0.0285377	0.0968942	0.100485	0.512976	-0.289802	0.286451	0.0695744	-0.00693449	-0.0842328	0.412666	-0.2711	-0.158796	0.308102	0.0492585	0.571966	-0.0537925	-0.119656	-0.0590984	0.299149	0.0593474	0.261413	-0.185774	-0.00455669	-0.120535	0.075353	0.442657	-0.130745	0.0518441	0.0123259

## Sheet: Figure 2Aiii
NG sound with FA onset	Up		Down
-7	0.11396	-0.338502	-0.0653953	-0.2711	0.0476542
-6.75	-0.124806	-0.258433	-0.22019	-0.2711	0.184937
-6.5	-0.243316	-0.28887	-0.283629	-0.2711	0.101921
-6.25	0.0658956	-0.319001	-0.297198	-0.2711	-0.137001
-6	0.542969	-0.303062	-0.297198	-0.2711	-0.202535
-5.75	0.613415	-0.34381	-0.22019	-0.2711	-0.135635
-5.5	0.287419	-0.289183	-0.00195718	-0.2711	-0.0697459
-5.25	0.051387	-0.0221469	0.229864	-0.2711	-0.0528275
-5	0.130225	0.254917	0.229864	-0.2711	-0.015494
-4.75	0.296293	0.288908	-0.00195718	-0.2711	-0.0125128
-4.5	0.265025	0.243973	-0.206621	-0.2711	0.0611947
-4.25	0.00995788	0.295641	-0.283629	-0.232336	0.221697
-4	-0.100149	0.39521	-0.297198	-0.161245	0.432886
-3.75	-0.0600062	0.390208	-0.297198	-0.0768779	0.479716
-3.5	-0.0212986	0.26522	-0.297198	0.0261362	0.32886
-3.25	-0.0376	0.0632146	-0.297198	0.181594	0.0853843
-3	-0.0604765	-0.0263268	-0.22019	0.305119	-0.112452
-2.75	-0.108046	-0.0717787	-0.0789643	0.252684	-0.132513
-2.5	-0.180756	-0.137938	0.0116311	0.0785704	-0.0292329
-2.25	-0.23443	-0.247825	-0.0789643	-0.108821	0.101718
-2	-0.402268	-0.368931	-0.22019	-0.225505	0.194371
-1.75	-0.585084	-0.45931	-0.283629	-0.225505	0.392561
-1.5	-0.42565	-0.4543	-0.297198	-0.0837179	0.663959
-1.25	-0.00631965	-0.349125	-0.22019	0.181594	0.770574
-1	0.273429	-0.137938	-0.0789643	0.369379	0.637587
-0.75	0.136354	0.0632297	0.0116311	0.298288	0.36229
-0.5	0.104591	0.153609	-0.00195718	0.0329665	0.34
-0.25	0.433321	0.128785	0.0750499	-0.179911	0.499965
0	0.613415	0.103664	0.243433	-0.257439	0.597287
0.25	0.478145	0.103969	0.229864	-0.2711	0.419335
0.5	0.265001	0.018608	-0.00195718	-0.2711	0.194918
0.75	0.0910592	-0.162761	-0.206621	-0.232336	0.0794693
1	-0.155604	-0.223322	-0.283629	-0.161245	-0.0023078
1.25	-0.39437	-0.0667686	-0.22019	-0.115642	-0.0259074
1.5	-0.338432	0.0384214	-0.00195718	-0.161245	0.0781182
1.75	0.0659076	-0.0224448	0.229864	-0.193572	0.252167
2	0.431081	-0.0224599	0.229864	-0.115651	0.398883
2.25	0.486537	0.169533	0.0750499	0.0329762	0.486382
2.5	0.374625	0.280031	0.0116118	0.14283	0.449804
2.75	0.472016	0.118169	0.0252001	0.259122	0.275756
3	0.535047	-0.127329	-0.0789643	0.446896	0.101703
3.25	0.304203	-0.267638	-0.22019	0.647958	0.0415358
3.5	-0.155616	-0.308378	-0.283629	0.750972	0.125302
3.75	-0.42565	-0.253438	-0.297198	0.867264	0.218169
4	-0.242834	-0.142948	-0.297198	0.952417	0.299152
4.25	0.153138	-0.072069	-0.297198	0.771483	0.302129
4.5	0.391421	-0.173072	-0.297198	0.298269	0.295613
4.75	0.279522	-0.368931	-0.297198	-0.0955534	0.316066
5	0.0905769	-0.509247	-0.297198	-0.243778	0.265358
5.25	0.0267177	-0.369244	-0.297198	-0.2711	0.0320969
5.5	0.216973	-0.00233348	-0.143183	-0.2711	-0.300442
5.75	0.487007	0.285048	0.216276	-0.193572	-0.390526
6	0.621313	0.193221	0.538693	-0.0513914	-0.185602
6.25	0.487007	-0.0121344	0.448098	0.0398163	-0.0195705
6.5	0.130237	-0.116408	0.152057	-0.0513914	-0.0329651
6.75	-0.147718	-0.13263	0.0251808	-0.193572	-0.1028
7	-0.163996	-0.107516	0.102207	-0.218675	-0.0792049
7.25	-0.0912626	-0.0773845	0.139269	-0.161245	0.0179512
7.5	-0.275872	-0.1022	0.0886383	-0.115642	0.0476643
7.75	-0.489968	-0.107821	-0.0653953	-0.161245	0.0578592
8	-0.425168	-0.0221469	-0.22019	-0.232336	0.084435
8.25	-0.124806	0.0540473	-0.283629	-0.264269	0.148902
8.5	0.153138	-0.0274548	-0.22019	-0.2711	0.121216
8.75	0.248253	-0.137945	-0.00195718	-0.2711	0.0378086
9	0.153126	-0.176954	0.229864	-0.193572	-0.0919894
9.25	-0.00453877	-0.258441	0.229864	0.0261362	-0.22354
9.5	-0.116438	-0.27856	-0.00195718	0.337052	-0.293161
9.75	-0.0213105	-0.112831	-0.206621	0.595524	-0.273304
10	0.169897	0.134108	-0.283629	0.782906	-0.173573
10.25	0.295811	0.153914	-0.22019	0.835733	-0.0223584
10.5	0.287902	-0.0578842	-0.0789643	0.616025	0.0110868
10.75	0.138629	-0.177267	0.0116311	0.188415	-0.0898066
11	-0.211554	-0.102208	-0.0789643	-0.134317	-0.115991
11.25	-0.529146	0.0133	-0.0661762	-0.250609	-0.025699
11.5	-0.607502	0.0079845	0.152838	-0.2711	0.0214952
11.75	-0.545423	-0.0525762	0.32046	-0.2711	-0.113198
12	-0.489474	-0.0667686	0.139269	-0.2711	-0.296898
12.25	-0.450308	-0.0720766	0.0108309	-0.2711	-0.383245
12.5	-0.315532	-0.0827001	0.166407	-0.2711	-0.344083
12.75	-0.155592	-0.0720766	0.32046	-0.2711	-0.183221
13	-0.172364	-0.0118289	0.216276	-0.2711	0.0108835
13.25	-0.315532	0.118162	0.229064	-0.2711	0.100967
13.5	-0.377598	0.224785	0.475236	-0.2711	0.0781233
13.75	-0.35471	0.134101	0.6157	-0.2711	-0.00918227
14	-0.30714	-0.0880156	0.434509	-0.2711	-0.0355547
14.25	-0.346318	-0.111703	0.179214	-0.2711	-0.0221651
14.5	-0.40275	0.0384063	0.102188	-0.2711	-0.0258973
14.75	-0.259594	0.189048	0.216276	-0.2711	-0.102591
15	-0.0208163	0.244278	0.334029	-0.2711	-0.216467

## Sheet: Figure 2Aiv
Reward onset (s)	Up																							Down
-7	-0.178357	-0.297198	-0.347519	-0.128506	0.00414683	-0.247841	-0.321693	0.0420251	0.137581	0.0983962	0.583795	0.0136968	0.00313196	-0.220056	-0.0997912	0.153693	-0.0268782	0.322245	-0.244906	-0.226076	0.0372437	0.386938	-0.00285723	-0.153903	-0.3522	0.380903	0.408664	-0.000528991	-0.217105	-0.23955	0.131844	0.107484	0.158529	-0.158323	0.145796	-0.166991	0.0641881	0.127719	-0.0780118	0.362638	0.114596	-0.164046	-0.00931368	-0.166295	-0.0242863	-0.104986
-6.75	-0.223832	-0.297198	-0.331	-0.101901	-0.0156667	-0.205187	-0.321693	0.0417975	0.0404964	-0.0462654	0.350782	-0.110056	-0.0494901	-0.294538	-0.0997969	0.200109	-0.22635	0.25484	-0.244906	-0.235743	-0.0175962	0.321685	0.0754213	-0.208888	-0.333197	0.236232	0.274099	0.0367752	-0.229833	-0.0786529	0.485699	0.0360619	0.101492	-0.118991	0.317256	-0.0862452	0.0447531	0.122797	-0.0890016	0.208556	0.1534	-0.193913	-0.0900351	-0.166295	-0.0067891	-0.0068754
-6.5	-0.257012	-0.297198	-0.273961	-0.0778269	0.0325438	-0.177825	-0.321693	0.060162	0.00756794	-0.196818	0.212407	-0.310461	-0.165736	-0.303739	-0.122653	0.215481	-0.361019	0.0570527	-0.244906	-0.221481	-0.197897	0.174686	0.142991	-0.350929	-0.262177	0.124246	0.194673	0.0932426	-0.229833	0.216422	0.796576	-0.0495978	0.0892729	-0.0833538	0.330218	-0.030837	-0.000149387	0.0609798	-0.0449815	0.0957477	0.133337	-0.125957	-0.0355329	-0.166295	-0.0739012	0.0627518
-6.25	-0.26397	-0.297198	-0.265494	-0.00891511	0.11431	-0.205187	-0.321693	0.0644146	-0.0334149	-0.229445	0.0797516	-0.417372	-0.195154	-0.304137	-0.156509	0.254641	-0.322924	-0.1695	-0.244906	-0.258121	-0.293904	0.125494	0.148747	-0.419517	-0.216811	0.0888108	0.175914	0.141681	-0.229833	0.405711	0.68616	-0.0716037	0.264367	0.00169603	0.204441	-0.033275	0.0596174	0.0877393	0.0153416	0.197643	0.124364	-0.0580127	0.089468	-0.166295	-0.164892	-0.0068754
-6	-0.33085	-0.297198	-0.270326	0.00728394	0.124729	-0.247841	-0.321693	0.0719846	-0.102941	-0.111078	-0.0840174	-0.428048	-0.0852275	-0.363195	-0.214315	0.311725	-0.233715	-0.320421	-0.216418	-0.255849	-0.192214	0.269428	0.0558201	-0.369976	-0.212463	0.131416	0.176092	0.147049	-0.157597	0.270055	0.301211	-0.0963059	0.460025	0.156631	0.0390169	-0.0561784	0.160394	0.166135	0.0793842	0.446294	0.0878876	-0.0756729	0.140258	-0.166295	-0.156149	-0.115415
-5.75	-0.384545	-0.297198	-0.184609	-0.0577099	0.0304609	-0.267001	-0.321693	0.0242164	-0.211506	0.012598	-0.170653	-0.384605	0.0262106	-0.427439	-0.229342	0.326551	-0.199634	-0.286874	-0.164173	-0.206651	-0.0308815	0.482566	-0.0417671	-0.255325	-0.205062	0.211448	0.178235	0.122216	-0.0251204	0.073338	0.0558476	-0.0495978	0.435753	0.192281	-0.11024	-0.0813762	0.168589	0.178471	0.121343	0.57	0.0564606	-0.134902	0.0944438	-0.166295	-0.0739012	-0.16417
-5.5	-0.41771	-0.143183	-0.127213	-0.117999	-0.188211	-0.2711	-0.321693	-0.149476	-0.392821	0.0815261	-0.277544	-0.326228	0.0393368	-0.410525	-0.206255	0.346698	-0.188879	-0.1574	-0.102169	-0.168292	-0.0331112	0.488186	-0.117718	-0.158214	-0.207735	0.173143	0.0932401	0.113498	0.0598622	0.0575201	-0.0338728	0.0992421	0.181502	0.0965998	-0.154901	-0.109149	0.150612	0.171279	0.160446	0.424483	0.0689433	-0.12641	0.0723543	-0.111833	0.0340834	-0.115415
-5.25	-0.471913	0.139269	-0.142135	-0.0961239	-0.35994	-0.2711	-0.321693	-0.35537	-0.514403	0.053304	-0.465722	-0.195364	-0.0373209	-0.355798	-0.191453	0.313474	-0.136741	-0.090935	-0.0834389	-0.105545	-0.267933	0.28462	-0.148701	-0.127923	-0.246469	-0.00735823	-0.0277813	0.0811664	0.0109977	0.118064	-0.140434	0.176672	-0.0322258	-0.0406921	-0.13243	-0.139219	0.180887	0.212551	0.207545	0.219454	0.149312	-0.021711	0.168543	-0.0119537	0.0667043	-0.0068754
-5	-0.509638	0.32046	-0.129061	-0.0829939	-0.351401	-0.247841	-0.321693	-0.41252	-0.411218	0.00253665	-0.549015	-0.00477802	-0.0935431	-0.302073	-0.16457	0.284927	-0.0840874	-0.080153	-0.102169	0.0333348	-0.458674	0.0799348	-0.148535	-0.129373	-0.248249	-0.100711	-0.00554915	-0.0175371	-0.0191225	0.18116	-0.229757	0.0910119	-0.124116	-0.199805	-0.0880356	-0.148303	0.195183	0.256141	0.264583	0.0339026	0.196356	0.16154	0.256166	0.10658	0.0340834	0.0627518
-4.75	-0.499307	0.216276	-0.0799158	-0.101576	-0.242732	-0.205187	-0.321693	-0.287767	-0.183783	0.0203108	-0.415849	0.0275204	-0.167232	-0.243475	-0.0997969	0.35913	-0.0758478	0.0188216	-0.159153	0.118474	-0.369183	-0.077501	-0.123807	-0.0792841	-0.113575	0.00381434	0.141177	-0.0902141	0.0662173	0.19061	-0.254396	-0.0880757	-0.126696	-0.276727	0.0200186	-0.153035	0.148669	0.223781	0.251912	-0.101312	0.200959	0.357298	0.214356	0.142388	-0.0651588	-0.0068754
-4.5	-0.496733	0.0750499	-0.0174754	-0.118496	-0.130754	-0.154567	-0.300924	-0.0849206	-0.0599303	0.102806	-0.210533	-0.0457973	-0.282222	-0.215622	-0.0538472	0.394562	-0.0326875	0.157391	-0.216418	0.110484	-0.130816	-0.173307	-0.0840971	-0.00608208	0.105091	0.205782	0.285282	-0.0709943	0.119727	0.118064	-0.240149	-0.173735	-0.100006	-0.280059	0.123605	-0.150737	0.0596174	0.124644	0.176742	-0.15226	0.235604	0.447351	0.0745963	0.161042	-0.164892	-0.115415
-4.25	-0.547405	0.0387691	-0.0119918	-0.0859769	-0.0355027	-0.139275	-0.242065	-0.00146493	-0.0603844	0.17042	-0.047893	-0.0793953	-0.317479	-0.256336	-0.0729078	0.3621	0.0346334	0.21081	-0.211399	0.130295	0.00975007	-0.151622	-0.0198338	0.0354304	0.220135	0.324677	0.320787	0.0112709	0.0534889	0.0386195	-0.217282	-0.134784	-0.000310492	-0.195969	0.15978	-0.153035	0.0276501	0.0932089	0.112593	-0.163157	0.341109	0.364436	-0.0104484	0.206446	-0.205764	-0.16417
-4	-0.54566	-0.00195718	-0.00946834	-0.0333255	0.0269609	-0.10805	-0.138003	-0.114447	-0.164314	0.199203	-0.0329586	-0.184558	-0.250097	-0.318753	-0.126686	0.245471	0.0105873	0.107208	-0.164173	0.198877	-0.0312127	-0.0566838	0.0528587	0.059642	0.118662	0.274551	0.247607	0.0938201	-0.0488763	-0.0244766	-0.24983	-0.088064	0.107353	-0.129095	0.114096	-0.164553	0.0962658	0.187477	0.106153	-0.101312	0.405787	0.263644	0.00400081	0.260922	-0.214507	-0.174599
-3.75	-0.498082	-0.00195718	0.0278837	0.0252306	0.0588674	-0.069264	-0.0410544	-0.273837	-0.299026	0.279809	-0.236721	-0.41324	-0.142651	-0.317592	-0.133653	0.162639	-0.0524257	-0.0349904	-0.130658	0.186205	-0.0446656	0.00838611	0.0704731	0.04118	-0.0553724	0.089834	0.108418	0.170631	-0.0488763	0.0197056	-0.250137	-0.143014	0.168791	-0.0871367	0.0881663	-0.192189	0.182652	0.307221	0.119305	0.0121078	0.334561	0.227089	0.0482695	0.216057	-0.214507	-0.174599
-3.5	-0.338006	0.0252001	0.136569	0.0780557	0.121058	-0.0612918	-0.0166203	-0.249659	-0.399756	0.331975	-0.520184	-0.691229	-0.0560564	-0.291708	-0.118626	0.110454	-0.0391452	-0.135465	-0.164173	0.0574387	0.0267959	-0.0566838	-0.0226289	0.0154179	-0.15456	-0.111267	-0.0246661	0.224429	0.0959711	0.136978	-0.0902995	-0.228674	0.12541	-0.0858536	0.0250397	-0.192329	0.231692	0.373556	0.127463	0.0848659	0.25314	0.236495	0.0559043	0.0425083	-0.214507	-0.174599
-3.25	-0.153259	-0.0789643	0.3066	0.0837476	0.228268	-0.111918	-0.0754844	-0.104752	-0.406173	0.259529	-0.668769	-0.792263	-0.0202001	-0.281497	-0.0809682	0.0684459	0.0574314	-0.134282	-0.216418	-0.0680769	0.00689628	-0.158119	-0.0901986	0.0239641	-0.160539	-0.21966	-0.120826	0.196571	0.222083	0.18116	0.102253	-0.267152	0.00386967	-0.0681572	-0.0880356	-0.153035	0.276048	0.391073	0.146464	0.0121078	0.257866	0.258608	-0.00311159	-0.0477751	-0.164892	-0.174599
-3	-0.108396	-0.22019	0.320817	0.0473787	0.270442	-0.158671	-0.138008	-0.0819224	-0.283598	0.109461	-0.608106	-0.697838	0.0138973	-0.250543	-0.0498199	0.0133749	0.177542	0.0200913	-0.239887	-0.0833151	0.0170008	-0.203683	-0.00502301	0.160663	-0.0780884	-0.221052	-0.160348	0.140257	0.198336	0.225329	0.0871467	-0.228674	-0.0567184	0.0169698	-0.150153	-0.109145	0.300376	0.37465	0.181599	-0.0394671	0.283365	0.301118	-0.0836838	0.0521047	-0.0242863	-0.174599
-2.75	-0.274189	-0.206621	0.100054	0.0425558	0.2423	-0.14637	-0.130684	-0.143757	-0.0984879	0.021707	-0.391844	-0.410621	0.0537386	-0.143003	-0.0957639	-0.0186341	0.28211	0.177663	-0.244906	-0.00773042	0.21988	-0.194992	0.103452	0.326446	0.0622557	-0.113117	-0.0770576	0.133192	0.0895979	0.342601	-0.113163	-0.0963059	0.0227931	0.137824	-0.114988	-0.116315	0.248164	0.313541	0.19422	0.0848503	0.226186	0.37111	-0.18387	0.315384	0.125074	-0.174599
-2.5	-0.480415	-0.0789643	-0.215779	0.0165578	0.184825	-0.116016	-0.117023	-0.0588525	0.0708774	0.147642	-0.108696	-0.128203	0.0900749	-0.0252843	-0.168603	0.00971009	0.260288	0.181148	-0.244906	0.0239208	0.411236	-0.105871	0.126019	0.339779	0.208691	0.0983242	0.114315	0.163778	0.125716	0.352065	-0.219368	0.0910119	0.157785	0.196923	0.0247733	-0.136921	0.185723	0.257665	0.15411	0.260131	0.188207	0.414233	-0.274339	0.515144	0.125074	-0.174599
-2.25	-0.515604	0.0116311	-0.372257	-0.0959926	0.16172	-0.0886541	-0.158772	0.156125	0.286303	0.366793	0.196386	0.0685411	0.070853	-0.00613933	-0.160542	0.0305138	0.142264	-0.0282145	-0.216418	-0.0402248	0.345626	0.0356914	0.0477317	0.114313	0.300894	0.404221	0.33618	0.165131	0.313421	0.118064	-0.152045	0.176672	0.206341	0.156163	0.177496	-0.136784	0.292379	0.347698	0.0577176	0.260131	0.303766	0.430128	-0.297938	0.479336	0.0253286	-0.115415
-2	-0.503809	-0.0789643	-0.335359	-0.177703	0.133155	-0.107814	-0.238405	0.319773	0.468554	0.46426	0.435647	0.224275	0.057944	-0.12117	-0.137449	0.00910976	-0.0394445	-0.268955	-0.164173	-0.0851783	0.136072	0.112883	-0.0366442	-0.087974	0.327129	0.672095	0.479858	0.100107	0.439167	-0.0155702	-0.0380753	0.13772	0.131552	0.0933734	0.249109	-0.0977669	0.466076	0.447627	-0.036091	0.073953	0.435363	0.417965	-0.263985	0.260908	0.034071	-0.0068754
-1.75	-0.565197	-0.22019	-0.236854	-0.127115	0.0802438	-0.181929	-0.297264	0.398747	0.487504	0.539503	0.611385	0.38794	0.0395871	-0.266954	-0.214309	0.0285707	-0.107442	-0.381898	-0.130658	-0.133791	0.016017	0.0541281	-0.0109499	-0.0948009	0.273775	0.847359	0.587219	-0.0163272	0.468912	0.190597	0.0322911	0.0442921	-0.0470052	0.07328	0.294779	-0.0584728	0.465292	0.392994	-0.0625565	-0.0904149	0.451146	0.333569	-0.199833	0.106567	0.183431	0.0627518
-1.5	-0.662823	-0.283629	-0.185073	-0.0652548	0.0265734	-0.243743	-0.318034	0.377906	0.20944	0.598696	0.662985	0.477729	-0.0829886	-0.307424	-0.34386	0.0600874	-0.0394445	-0.402115	-0.164173	-0.217052	-0.0225242	-0.0319368	0.0755917	0.0272535	0.174472	0.826313	0.592226	-0.117504	0.560249	0.494606	0.0518005	-0.0331257	-0.216768	0.0602729	0.437992	-0.056175	0.280868	0.228104	-0.0109677	-0.15226	0.33465	0.163479	-0.131449	0.125773	0.364909	0.0523085
-1.25	-0.740743	-0.297198	-0.129772	-0.0629316	-0.0243823	-0.267001	-0.321693	0.153479	-0.203441	0.48947	0.502875	0.45583	-0.290419	-0.191884	-0.404606	0.0458124	0.0789677	-0.3641	-0.216418	-0.257576	0.0501938	0.0146872	0.12898	0.0893422	0.164035	0.618828	0.479452	-0.17303	0.80108	0.60187	0.0896226	-0.134784	-0.318935	0.00473045	0.654394	-0.100065	0.0748102	0.113234	0.0377147	-0.163157	0.220342	-0.0109046	-0.159568	0.19685	0.4559	0.0523085
-1	-0.727316	-0.297198	-0.0776078	0.025804	-0.0553293	-0.2711	-0.321693	-0.0334487	-0.38528	0.188012	0.281665	0.455153	-0.340815	-0.0170205	-0.34386	0.033573	0.0989162	-0.34741	-0.211399	-0.287206	0.157446	0.143437	0.109204	0.0864602	0.317791	0.420886	0.34687	-0.147959	0.999803	0.475678	0.154867	-0.135258	-0.400409	-0.0460683	0.668651	-0.134487	-0.0243573	0.0683593	0.0144991	-0.0394671	0.199926	-0.0652814	-0.282724	0.260922	0.432021	0.0731803
-0.75	-0.577594	-0.143183	-0.0977685	0.364509	-0.0955427	-0.247841	-0.321693	0.0453822	-0.181402	-0.0166584	0.0155064	0.482657	-0.123316	0.199873	-0.214309	0.132777	0.0389709	-0.362558	-0.135684	-0.260282	0.270955	0.242132	0.0615765	0.178696	0.461558	0.354024	0.295536	-0.069172	0.922556	0.370422	0.226445	0.0442921	-0.487081	-0.150623	0.325463	-0.1506	-0.0394808	0.051899	-0.0930697	0.187373	0.232383	-0.0305013	-0.456929	0.216057	0.315282	-0.0068754
-0.5	0.0247833	0.216276	-0.0146854	0.749811	-0.0748568	-0.205187	-0.259385	0.392839	0.252829	0.109358	-0.0761326	0.622639	0.237235	0.418158	-0.054079	0.320108	0.0560417	-0.273732	-0.0499238	-0.120091	0.351301	0.195685	0.0228371	0.443721	0.366816	0.427888	0.282578	-0.0492506	0.541505	0.235323	0.296967	0.231622	-0.469956	-0.379311	-0.0376243	-0.164553	-0.0544178	0.0561009	-0.255637	0.332889	0.211118	0.0258594	-0.557774	0.0425083	0.332276	-0.115415
-0.25	1.14757	0.769714	0.538968	0.843451	0.191037	-0.131308	-0.0620396	0.832783	0.614231	0.558687	0.180658	1.13368	0.469618	0.532038	0.159062	0.510794	0.185018	-0.0896144	-0.0214356	0.287712	0.496456	0.0636916	-0.0394351	0.570762	0.0207903	0.522807	0.165289	-0.155884	0.217054	0.0828017	0.239783	0.176672	-0.327535	-0.501254	-0.140664	-0.192189	-0.0967667	0.0519542	-0.440292	0.187373	0.093889	0.181366	-0.547454	-0.102237	0.473385	-0.16417
0	2.23912	1.1798	1.26283	0.483882	0.68503	-0.0268457	0.225929	1.20481	0.907216	1.13814	0.821548	1.87584	0.478151	0.520972	0.438075	0.582178	0.45592	0.0232609	-0.0549507	0.831466	0.683204	-0.077501	-0.0308878	0.242248	-0.321807	0.755586	0.0683749	-0.321827	0.0491917	-0.0686588	-0.000260784	-0.0495978	-0.15584	-0.316828	-0.00692663	-0.192329	-0.124172	0.0455982	-0.557309	-0.0394671	0.0813991	0.32944	-0.46246	-0.102237	0.51427	-0.174599
0.25	2.43409	1.29678	1.45765	-0.0367742	1.13482	0.0937914	0.385401	1.35576	1.10262	1.33455	1.26796	2.11547	0.391669	0.440477	0.617598	0.521685	0.806101	0.0273513	0.0737797	1.17612	0.730826	-0.0258134	0.0923937	-0.323684	-0.54517	0.938205	0.0543835	-0.454049	-0.0552405	-0.132285	-0.236962	-0.212213	-0.0683001	0.0482754	0.155305	-0.0286897	-0.131813	0.00290177	-0.576772	-0.141363	0.218968	0.199408	-0.374471	-0.0119537	0.324037	-0.115415
0.5	1.84418	0.988709	1.06536	-0.406558	1.2778	0.18706	0.388634	1.13659	1.03273	1.0207	1.15972	1.58207	0.320693	0.303914	0.544765	0.403508	1.05104	0.0505641	0.467691	1.14002	0.583269	0.284803	0.311231	-0.75422	-0.695145	0.731207	-0.0545812	-0.517161	-0.0849944	-0.0244766	-0.329329	-0.267152	-0.17398	0.382113	0.145802	0.339954	-0.177703	-0.0979312	-0.542977	-0.163157	0.289116	-0.175183	-0.358488	0.161042	0.034071	-0.0068754
0.75	1.16631	0.474455	0.648186	-0.515981	1.14739	0.337804	0.430373	0.751857	0.693148	0.542485	0.626407	0.883889	0.196138	0.174933	0.293723	0.334562	1.04533	0.0862422	0.958209	0.96032	0.370873	0.716129	0.498947	-0.956437	-0.822749	0.127916	-0.373928	-0.530841	-0.0786212	0.127528	-0.239589	-0.228674	-0.40734	0.47153	-0.00692663	0.89131	-0.251948	-0.215194	-0.465522	-0.163157	0.166238	-0.482645	-0.425686	0.29673	-0.147407	0.0627518
1	0.712309	0.0387498	0.452459	-0.391702	1.01113	0.687633	0.649487	0.510979	0.420955	0.466777	0.136382	0.790307	0.00509842	0.11711	0.00394125	0.310199	0.923211	0.0251676	1.2004	0.896134	0.254971	1.08729	0.636366	-0.991708	-0.944191	-0.464629	-0.719704	-0.545307	-0.127477	0.127528	-0.0855819	-0.143014	-0.513421	0.356616	-0.150153	1.37947	-0.266567	-0.241369	-0.367311	-0.163157	-0.0235527	-0.587208	-0.549767	0.324994	-0.106534	0.0523085
1.25	0.465633	-0.129614	0.401905	-0.288747	0.949381	1.14194	0.940122	0.441785	0.237123	0.572145	-0.0897542	1.12762	-0.0996388	0.144751	-0.148692	0.276571	0.936892	-0.104195	1.3325	0.891016	0.260667	1.36136	0.687291	-0.951723	-1.01911	-0.85101	-1.00595	-0.579138	-0.193715	0.0197056	0.0296598	-0.088064	-0.428224	0.197814	-0.186601	1.66879	-0.213148	-0.162355	-0.297835	-0.163157	-0.12407	-0.577347	-0.662339	0.151984	0.0667043	0.0523085
1.5	0.407958	0.0116118	0.355733	-0.347786	0.869325	1.45211	1.21689	0.425465	0.0898128	0.636595	-0.086172	1.35455	-0.0956505	0.145661	-0.164344	0.221792	1.07076	-0.136639	1.69561	0.841417	0.265587	1.36674	0.614603	-0.915527	-1.0037	-1.04376	-1.19222	-0.609567	-0.223469	-0.0244766	-0.0176989	-0.0963059	-0.290903	0.226816	-0.110233	1.65715	-0.155994	-0.0847331	-0.24832	-0.163157	-0.0912625	-0.519378	-0.675175	-0.0573715	0.183444	0.0731803
1.75	0.45955	0.306872	0.416206	-0.530207	0.663477	1.55334	1.41543	0.387446	0.000314263	0.686454	-0.0459314	1.31023	-0.0307515	0.111628	-0.133647	0.0650897	1.17344	-0.0579323	2.14285	0.827419	0.308117	0.922043	0.429377	-0.871435	-0.925244	-1.14165	-1.25088	-0.605951	-0.229833	-0.0150129	-0.147783	-0.0495978	-0.278912	0.337601	0.0247733	1.54222	-0.175619	-0.13826	-0.181517	-0.163157	-0.00495889	-0.462482	-0.572534	-0.147103	0.116319	-0.0068754
2	0.608293	0.448098	0.473512	-0.682323	0.405701	1.51501	1.4362	0.33826	-0.00537899	0.900569	-0.0470689	1.21564	0.00969508	0.112124	-0.172398	-0.0961522	1.05493	0.0706059	2.20379	0.827714	0.453918	0.365733	0.319936	-0.802168	-0.865657	-1.19269	-1.27445	-0.58047	-0.229833	-0.0875593	-0.197065	0.0992421	-0.317935	0.336062	0.167993	1.4417	-0.23828	-0.237033	-0.0960332	-0.101312	0.0200846	-0.401747	-0.429381	-0.166295	0.0253286	-0.115415
2.25	0.871175	0.460886	0.439028	-0.729882	0.246428	1.39139	1.27328	0.273504	-0.0475882	1.11676	-0.0453555	1.07697	-0.0389419	0.131351	-0.23337	-0.165679	0.738527	0.181058	1.92382	0.735039	0.537738	0.117672	0.384711	-0.743138	-0.865006	-1.22664	-1.30265	-0.555392	-0.193715	-0.185918	-0.127402	0.176672	-0.257078	0.178397	0.285557	1.33956	-0.286998	-0.267202	-0.0249366	0.0121078	-0.0300956	-0.337443	-0.292531	-0.166295	0.00195326	-0.16417
2.5	1.09232	0.525085	0.436229	-0.641553	0.129724	1.27461	1.10747	0.191086	-0.174058	1.09354	-0.0903967	0.782656	-0.10247	0.0969402	-0.267	-0.130907	0.408918	0.346524	1.61515	0.497468	0.38925	0.14993	0.477018	-0.731305	-0.883289	-1.29549	-1.31979	-0.533673	-0.127477	-0.2301	-0.0776692	0.0910119	-0.166909	0.0157822	0.31725	1.10697	-0.31118	-0.250712	0.0283032	0.0848659	-0.0789685	-0.240642	-0.160097	-0.166295	-0.0739012	-0.174599
2.75	1.14009	0.706276	0.724549	-0.408256	0.0243691	1.35558	1.22131	0.215538	-0.234616	0.935213	-0.144576	0.472484	-0.0494996	0.00283368	-0.260259	-0.106727	0.124739	0.455215	1.50199	0.21839	0.119941	0.285507	0.409618	-0.723542	-0.858846	-1.34227	-1.32283	-0.505747	-0.0849853	-0.185918	-0.144988	-0.0880757	-0.100993	-0.0162523	0.276047	0.710424	-0.31118	-0.249994	0.0218567	0.0121078	-0.0723206	-0.170424	-0.0943623	-0.166295	-0.115277	-0.174599
3	1.15992	0.6799	1.15654	-0.0551695	0.010688	1.61649	1.61278	0.474212	-0.0564315	0.855985	-0.0831272	0.501734	0.0753182	-0.0581582	-0.210282	-0.145468	-0.0425405	0.375309	1.32999	0.0264686	-0.0458129	0.484549	0.227018	-0.668935	-0.809276	-1.2693	-1.2848	-0.492016	-0.127477	-0.0875593	-0.235035	-0.173735	-0.112235	-0.0299798	0.326472	0.324998	-0.286185	-0.259306	-0.0296184	-0.0394671	-0.0849674	-0.179503	-0.0830615	-0.111833	-0.0651588	-0.174599
3.25	1.28862	0.383879	1.21179	0.287356	0.0318108	1.86051	2.06424	0.774285	0.222227	0.80629	0.0672726	0.7507	0.104486	-0.00157558	-0.160537	-0.212379	-0.0592919	0.149702	0.972972	0.00478694	-0.0627073	0.727551	0.0902279	-0.463034	-0.758114	-1.171	-1.25651	-0.51153	-0.193715	-0.0244631	-0.234879	-0.134784	-0.169817	-0.0591209	0.362184	0.147406	-0.184746	-0.212619	-0.033282	0.0230052	-0.145111	-0.253175	-0.0420972	-0.0119537	-0.0155315	-0.174599
3.5	1.52076	0.0251808	0.9397	0.43273	0.00576328	1.87903	2.23558	0.806049	0.278921	0.575832	0.0997596	0.851892	0.0326391	0.0792428	-0.15357	-0.320252	0.0433906	-0.0715587	0.502836	0.0721251	0.0524316	0.883502	0.0426046	-0.213486	-0.677871	-1.16781	-1.26336	-0.565349	-0.223469	-0.0339269	-0.19178	-0.088064	-0.220994	-0.0334451	0.348676	0.101893	-0.0103839	-0.0702828	-0.0129819	0.208556	-0.130807	-0.257753	0.0365769	0.10658	-0.0739012	-0.174599
3.75	1.62892	-0.206621	0.667354	0.242273	-0.0244802	1.75305	2.14753	0.606625	0.155401	0.327286	0.104476	0.638889	-0.0620237	0.118793	-0.114824	-0.410605	0.150834	-0.182952	0.112596	0.115764	0.187634	0.699542	0.00819249	-0.0731247	-0.550043	-1.1665	-1.22793	-0.615116	-0.229833	-0.0339269	-0.217997	-0.0963059	-0.203124	0.00492776	0.303259	0.00344114	0.130259	0.0948261	-0.0134381	0.362638	0.00446076	-0.127433	0.0971649	0.142388	-0.115277	-0.115415
4	1.51691	-0.283629	0.391497	-0.0202572	0.0418662	1.4181	1.76344	0.431748	0.0256393	0.263956	0.11854	0.33773	-0.114517	0.083606	-0.0995652	-0.433133	0.213114	-0.235244	-0.0820975	0.0505872	0.130724	0.439498	-0.0307131	-0.145491	-0.424803	-1.01897	-1.05892	-0.591162	-0.229833	-0.0150129	-0.249982	-0.0963059	-0.143695	-0.09188	0.299534	-0.0839543	0.106139	0.156353	-0.00262925	0.394734	0.182213	-0.0255556	0.0647584	0.10658	-0.0651588	-0.0068754
4.25	1.39195	-0.297198	0.0721274	-0.0854145	0.147513	1.15462	1.30094	0.424892	0.0231383	0.363442	0.138745	0.140383	-0.132109	0.0491807	-0.141708	-0.400095	0.291486	-0.196958	-0.130665	-0.114959	-0.0334544	0.246608	-0.100907	-0.253008	-0.316726	-0.755062	-0.808734	-0.487606	-0.193715	0.0197056	-0.251757	-0.0798338	-0.0684955	-0.21548	0.241155	-0.0969728	-0.0250718	0.102977	0.00660371	0.19827	0.271384	-0.0525325	-0.0453983	-0.00235728	-0.0155315	0.18112
4.5	1.32517	-0.297198	-0.261025	0.0932838	0.159308	0.999596	1.04269	0.546502	0.078053	0.479641	0.0831894	-0.024264	-0.072697	0.0394764	-0.164575	-0.41945	0.301549	-0.0975922	-0.125638	-0.255014	-0.0845257	0.127875	-0.168473	-0.161989	-0.152904	-0.517046	-0.566615	-0.366901	-0.127477	0.118064	-0.230469	-0.143014	-0.0390592	-0.236354	0.118577	-0.0748669	-0.113402	0.0383094	-0.0493527	-0.0394671	0.265542	-0.148229	0.00725152	-0.0573715	-0.0739012	0.387755
4.75	1.26962	-0.297198	-0.358423	0.277998	0.135362	0.867093	0.903226	0.634508	0.255766	0.486307	-0.00587931	-0.231953	0.0096919	0.0390772	-0.0997969	-0.483608	0.23377	-0.083288	-0.135684	-0.306336	-0.00846329	0.0920612	-0.196163	0.115019	0.0879247	-0.386923	-0.380039	-0.270931	-0.0849853	0.200074	-0.144992	-0.228674	-0.0537553	-0.196532	0.0120716	0.00817343	-0.119354	-0.00345849	-0.148835	-0.141363	0.147934	-0.211387	0.235025	-0.00235728	-0.164892	0.52701
5	1.08022	-0.22019	-0.268769	0.303782	0.129228	0.607124	0.704892	0.52161	0.47003	0.367756	-0.114742	-0.400482	0.0283117	0.0194574	-7.46204e-05	-0.476778	0.0829654	-0.212361	-0.0502198	-0.270245	-0.0225161	0.0942501	-0.185279	0.392356	0.337221	-0.3796	-0.275444	-0.219137	-0.127477	0.0644316	-0.0998211	-0.173735	-0.0370463	-0.132377	-0.13243	0.0939319	-0.104733	-0.0514523	-0.188222	-0.101312	-0.0346326	-0.234105	0.382129	0.10658	-0.156149	0.467811
5.25	0.686045	-0.0789643	-0.29446	0.209106	0.118285	0.353966	0.486561	0.335207	0.565558	0.267242	-0.195089	-0.377239	0.00347427	-0.0166066	0.0714334	-0.35522	-0.00189525	-0.280402	0.116564	-0.206795	-0.16056	0.183372	-0.137652	0.426161	0.519093	-0.390363	-0.217206	-0.207695	-0.193715	-0.132285	-0.137946	-0.0106462	0.0686332	-0.105206	-0.240765	0.0637251	-0.121758	-0.0717203	-0.127427	0.073953	-0.172938	-0.258963	0.294153	0.142388	-0.0739012	0.279216
5.5	0.260857	0.0886383	-0.462323	0.126248	0.0458887	0.2502	0.406927	0.229739	0.349242	0.262385	-0.17898	-0.184296	-0.0455114	-0.0551254	0.189979	-0.257635	0.0524644	-0.213652	0.178574	-0.204924	-0.274927	0.349873	-0.03664	0.280235	0.584192	-0.407835	-0.269658	-0.243555	-0.223469	-0.22065	-0.192499	0.0992538	0.212098	-0.118145	-0.13271	-0.0586164	-0.11178	-0.0113904	-0.0233708	0.321976	-0.201295	-0.271771	0.187999	0.161042	-0.0155315	0.142793
5.75	-0.0132319	0.139269	-0.467816	0.141574	0.036915	0.241779	0.458683	0.209442	-0.0357346	0.267337	-0.130904	-0.0359925	-0.0660056	-0.0575022	0.289933	-0.303611	0.145659	-0.0779747	0.0827595	-0.224051	-0.383064	0.417501	0.123049	0.110679	0.487706	-0.344971	-0.32297	-0.296383	-0.193715	-0.185918	-0.221844	-0.0106462	0.311951	-0.106722	0.123605	-0.132056	0.00803024	0.122737	0.0603039	0.497242	-0.129046	-0.249259	0.163462	0.151984	-0.0739012	0.00355306
6	-0.0467213	0.0886383	-0.238329	0.193345	0.125221	0.252967	0.503891	0.21464	-0.212775	0.316408	-0.00681685	0.0301301	-0.0664857	-0.0375111	0.281641	-0.372567	0.145251	-0.0102342	0.0070455	-0.238449	-0.46419	0.331249	0.271863	-0.0316511	0.272271	-0.145754	-0.23374	-0.303464	-0.127477	-0.0875593	-0.210244	-0.135258	0.394939	-0.0598607	0.231673	-0.131912	0.168108	0.209722	0.0659981	0.559087	-0.0509526	-0.166736	0.122889	0.10658	-0.115277	-0.115415
6.25	0.105776	-0.0653953	-0.0141589	0.21642	0.204253	0.252973	0.385391	0.228337	-0.150333	0.428079	0.107214	0.0776551	-0.0434039	0.013636	0.23189	-0.313133	0.0681969	0.00390092	-0.00134943	-0.267678	-0.46403	0.238865	0.260983	-0.147809	0.0829015	0.0890074	-0.0240434	-0.26166	-0.0849853	-0.0244631	-0.0779762	-0.126554	0.463079	0.00692002	0.0646866	-0.139215	0.183604	0.142231	0.0209008	0.508139	-0.0079241	-0.0945066	0.0629092	-0.00235728	-0.0651588	-0.16417
6.5	0.118822	-0.22019	-0.00979988	0.115604	0.163834	0.269136	0.202267	0.183924	-0.11743	0.450001	0.144218	0.0453138	-0.0932833	0.0936851	0.210127	-0.157597	-0.0282733	0.00564451	-0.0834389	-0.27981	-0.30543	0.233436	0.0783826	-0.233636	0.0207512	0.212096	0.14484	-0.23376	-0.127477	-0.0875593	0.110007	-0.088064	0.475614	-0.0131222	-0.0518746	-0.180807	0.0434763	-0.00285367	0.00883781	0.332874	-0.0382126	-0.0531199	0.0457558	-0.111833	-0.0155315	-0.174599
6.75	-0.00248003	-0.283629	-0.145914	-0.0189439	0.130607	0.310677	0.115515	0.134336	-0.170005	0.376638	0.0729059	0.0180693	-0.27776	0.180735	0.106609	0.00594768	-0.0898967	-0.0226391	-0.18793	-0.260683	-0.0822718	0.174877	-0.0645085	-0.175015	0.11598	0.125436	0.0876096	-0.239853	-0.193715	-0.132285	0.163995	-0.143014	0.448507	-0.0261947	0.0836781	-0.217527	-0.0599402	-0.0714602	0.0192175	0.0848503	-0.00978248	-0.0187549	0.03022	-0.156699	-0.0242863	-0.174599
7	-0.0235204	-0.297198	-0.232507	-0.0860464	0.175426	0.400966	0.170725	0.0919595	-0.222747	0.333366	-0.076485	0.0995708	-0.423424	0.228066	-0.0540847	0.0663269	-0.0448372	-0.0727117	-0.234867	-0.216356	0.00975007	0.0539365	-0.0416009	-0.0332712	0.299666	-0.0943971	-0.117402	-0.254153	-0.223469	-0.078109	0.0869875	-0.135258	0.462947	0.138513	0.317256	-0.231343	-0.016899	-0.0448306	6.32701e-05	-0.0904149	0.0974028	0.0210162	-0.0108155	-0.166295	-0.0242863	-0.174599
7.25	0.153456	-0.297198	-0.254465	-0.10428	0.229031	0.443615	0.302881	0.0448126	-0.256429	0.356147	-0.0630392	0.216902	-0.414368	0.171887	-0.129632	0.127174	0.0252549	-0.0343494	-0.244906	-0.190385	-0.0740739	0.0268089	-0.00268259	0.0346741	0.474278	-0.230461	-0.278027	-0.275502	-0.229833	0.0291693	-0.00482679	-0.00241604	0.530287	0.4431	0.428776	-0.233777	0.113555	0.0326756	-0.0636333	-0.15226	0.153949	0.071486	-0.0175208	-0.166295	-0.0067891	-0.174599
7.5	0.307578	-0.22019	-0.329526	-0.169346	0.270973	0.469628	0.374407	0.0141782	-0.269928	0.318692	-0.0108708	0.173926	-0.336689	0.095837	0.0185109	0.217838	0.0161729	0.0333598	-0.244906	-0.129645	-0.0932142	0.0888172	-0.0732136	-0.102992	0.523046	-0.228519	-0.303184	-0.276691	-0.193715	0.0644316	0.0171735	0.145962	0.490548	0.536549	0.469699	-0.219961	0.134491	0.0518032	-0.128597	-0.163157	0.0595261	0.114683	0.0899724	-0.111833	-0.0739012	-0.174599
7.75	0.364607	-0.0789643	-0.350873	-0.260608	0.243093	0.517729	0.361745	0.00509649	-0.36129	0.267062	-0.035324	-0.0211969	-0.263477	0.0719741	0.338585	0.224972	-0.0111646	0.0479642	-0.244906	-0.0609231	0.0913039	0.0695031	-0.202089	-0.357446	0.406422	-0.168669	-0.209986	-0.238811	-0.127477	0.0291693	0.177019	0.121722	0.323907	0.320492	0.452522	-0.194623	0.0570757	0.0194845	-0.191188	-0.101312	-0.088486	0.130344	0.232832	-0.0119537	-0.164892	-0.174599
8	0.345369	0.0116311	-0.223777	-0.278001	0.197153	0.401202	0.195364	0.0255312	-0.379934	0.348234	-0.0762689	-0.173675	-0.13832	0.0873535	0.57972	0.054585	0.0162767	-0.0265618	-0.244906	-0.0472201	0.173748	0.00494127	-0.257805	-0.537514	0.222149	-0.116044	-0.119148	-0.170974	-0.0849853	-0.0244766	0.309442	0.0987684	0.157772	0.0636761	0.31725	-0.178369	-0.0427038	-0.0530451	-0.262015	0.073953	-0.147446	0.12724	0.248607	0.0521184	-0.205764	-0.115415
8.25	0.2193	-0.00195718	-0.0611243	-0.243794	0.196532	0.136198	-0.0168413	0.0197934	-0.262835	0.49263	-0.0285644	-0.155771	0.0938002	0.0802	0.563588	-0.165885	0.0490826	-0.0589595	-0.244906	-0.0566377	0.00673679	-0.0285012	-0.252508	-0.590702	0.133439	-0.105666	-0.123205	-0.0778274	-0.0913585	0.0197056	0.244194	0.138182	0.0758557	-0.0189349	0.0789303	-0.194623	-0.126255	-0.124048	-0.291133	0.260131	-0.0945853	0.0957396	0.171083	0.0425083	-0.164892	-0.0068754
8.5	0.047882	0.0750499	0.0143435	-0.254459	0.204448	-0.00659051	-0.119705	-0.0730487	-0.189035	0.517098	-0.0528565	-0.0781649	0.368004	0.0492602	0.456892	-0.283065	-0.0114558	0.0346072	-0.244906	-0.116678	-0.221634	-0.043867	-0.232902	-0.582519	0.166205	-0.151724	-0.268762	-0.00688598	-0.0913585	0.136978	0.0921022	0.19267	-0.0117267	-0.018058	-0.150153	-0.0818	-0.172958	-0.170361	-0.257307	0.260131	0.00733751	0.0680649	0.131125	0.0425083	-0.0739012	0.0627518
8.75	-0.123076	0.320441	0.0197605	-0.303015	0.227995	-0.00224477	-0.151453	-0.0689415	-0.11845	0.482526	-0.0797393	-0.0679776	0.485105	0.0387643	0.378644	-0.270091	-0.0266988	0.134381	-0.216418	-0.25314	-0.267333	-0.105684	-0.188245	-0.562918	0.215298	-0.09074	-0.31376	-0.00302114	-0.0786212	0.127528	0.0525047	0.129952	-0.109175	-0.0744057	-0.231269	0.215462	-0.191441	-0.208889	-0.184676	0.135798	0.0943468	0.0287723	0.208961	0.0617148	0.0340834	-0.0068754
9	-0.165526	0.448098	-0.0486391	-0.299273	0.221436	0.000516622	-0.120898	0.0149085	-0.107643	0.470368	-0.0334037	-0.038639	0.277675	0.0689638	0.262806	-0.121005	-0.00514514	0.153169	-0.164173	-0.311612	-0.10556	-0.176556	-0.0929853	-0.548293	0.209149	0.055803	-0.218248	-0.0289336	-0.127477	-0.0339269	0.139912	0.00535221	-0.173455	-0.15259	-0.141933	0.47692	-0.138856	-0.182737	-0.128961	0.146696	0.0685952	-0.00610477	0.282895	-0.0119537	0.0667043	-0.115415
9.25	-0.0702768	0.306872	-0.129646	-0.280372	0.133846	0.0196708	0.00414378	0.0211166	-0.244411	0.376911	0.0315608	0.0341225	0.00320814	0.0880149	0.167117	0.0441936	0.0249301	0.0907733	-0.102169	-0.218778	0.0897731	-0.206932	0.01988	-0.484534	0.164207	0.0242958	-0.143124	0.0120121	-0.193715	-0.122835	0.174539	-0.126554	-0.186709	-0.145711	0.0564732	0.407028	0.0157426	-0.0396267	-0.10119	0.332874	0.0030602	-0.0532172	0.284762	-0.0573715	0.0340834	-0.16417
9.5	-0.0117996	0.0116118	-0.25216	-0.268437	0.0778737	0.125246	0.14996	-0.0267107	-0.328982	0.217994	0.0871345	0.153293	-0.0487787	0.0268361	0.172238	0.0405288	0.0790634	0.114988	0.00202576	-0.051653	0.243617	-0.213429	0.0162851	-0.375595	0.118032	-0.161844	-0.166882	0.105917	-0.223469	-0.0244766	0.0570782	-0.228674	-0.125765	-0.0534463	0.217409	0.194573	0.244228	0.197401	-0.103296	0.435396	-0.0189249	-0.0781253	0.213662	-0.00235728	-0.0651588	-0.115415
9.75	-0.0202054	-0.206621	-0.385338	-0.210513	0.145799	0.183198	0.180726	0.0486136	-0.12787	0.157033	0.149736	0.200874	0.0186191	-0.0615366	0.209033	-0.160769	0.157804	0.161524	0.16852	0.0688743	0.276194	-0.213429	-0.0476897	-0.252284	0.062755	-0.255717	-0.191228	0.167131	-0.193715	0.127528	-0.0649525	-0.220444	-0.0745724	0.0767631	0.280809	0.140896	0.416435	0.398423	-0.135886	0.383821	0.106445	-0.0242881	0.172629	0.0521184	-0.115277	-0.0068754
10	-0.0172149	-0.206621	-0.307693	-0.116052	0.225318	0.11705	0.128975	0.179493	0.215214	0.263019	0.228619	0.086718	-0.0179675	-0.14464	0.258784	-0.372077	0.201588	0.129897	0.264328	0.125873	0.249132	-0.213429	-0.117718	-0.118366	-0.0108026	-0.144357	-0.147611	0.171602	-0.127477	0.127528	-0.0725582	-0.0963059	-0.081029	0.170711	0.245636	0.168025	0.420603	0.454158	-0.141207	0.260116	0.281445	0.109309	0.184348	-0.0119537	-0.0651588	0.0627518
10.25	-0.040627	-0.0789643	0.053223	-0.045155	0.148501	0.00460899	0.0703219	0.159586	0.345994	0.427657	0.233063	-0.159031	-0.0712043	-0.217411	0.229187	-0.406945	0.103987	0.112922	0.140032	0.0575826	0.198229	-0.213429	-0.131895	-0.0827367	0.0647324	0.0262837	-0.100721	0.141408	-0.0488673	-0.0339269	0.0426835	0.0443038	-0.0935672	0.221194	0.141041	0.114257	0.394147	0.428001	-0.0820006	0.219454	0.414832	0.239233	0.153484	-0.111833	-0.0155315	0.0523085
10.5	-0.195836	0.0886383	0.272935	-0.0520319	-0.0209802	-0.0571994	0.0114683	0.0512884	0.203259	0.494846	0.141897	-0.359441	0.0921665	-0.263534	0.0754607	-0.280379	-0.0626764	0.146692	-0.0736883	-0.0277001	0.12072	-0.213429	-0.0841013	-0.16342	0.347506	0.101763	-0.0938588	0.0608571	-0.0251204	-0.176467	0.134078	0.0443038	-0.00135733	0.280963	0.0659689	-0.000773781	0.466408	0.438473	-0.0169993	0.19827	0.486552	0.298549	0.0763099	-0.156699	-0.0739012	0.0523085
10.75	-0.307685	0.139269	0.239308	-0.139414	-0.122063	-0.0804577	-0.0718247	-0.0078371	-0.0133996	0.404972	0.0296036	-0.292314	0.356082	-0.288518	-0.0460301	-0.138131	-0.231314	0.165978	-0.172871	-0.0267168	-0.00924287	-0.213429	0.00802629	-0.285319	0.654216	0.12667	-0.0515258	-0.0354163	-0.0488673	-0.2301	0.191829	-0.0963059	0.168975	0.291076	0.0295144	-0.0880291	0.649593	0.55463	0.00355168	0.146711	0.547671	0.277982	-0.0244402	-0.111833	-0.164892	0.0731803
11	-0.234737	0.165645	0.137399	-0.246918	-0.053211	-0.116016	-0.138008	-0.0828011	-0.203502	0.273906	-0.0424487	-0.064433	0.400138	-0.323522	-0.0836818	-0.0607232	-0.357218	0.0880185	-0.130665	-0.012859	-0.0173274	-0.213429	0.0617511	-0.343858	0.709525	0.0647447	-0.011925	-0.0324807	-0.0849944	-0.23955	0.224669	-0.220444	0.262126	0.224338	0.113823	-0.136784	0.650888	0.578289	-0.0307416	0.0230052	0.479785	0.19256	-0.09713	-0.0119537	-0.156149	-0.0068754
11.25	-0.0785593	0.152838	0.0344315	-0.292899	0.106247	-0.150468	-0.151453	-0.189299	-0.289899	0.191173	-0.0936744	0.113582	0.169975	-0.289617	-0.122653	-0.014856	-0.395204	0.0084978	-0.0499238	0.0331836	0.11251	-0.213429	0.0307593	-0.353903	0.521783	-0.0747284	-0.0442175	0.0284787	-0.0913585	-0.23955	0.229084	-0.220444	0.198397	0.157116	0.299807	-0.162119	0.380781	0.381557	-0.0561651	-0.101312	0.342127	0.0739749	-0.0955404	0.0521184	-0.0739012	-0.115415
11.5	-0.0239593	0.0886383	-0.16386	-0.274411	0.19033	-0.201089	-0.155112	-0.24497	-0.268581	0.243748	-0.0699876	0.0607239	-0.0704803	-0.206289	-0.16457	-0.0301573	-0.303804	-0.0739455	-0.0499238	0.0816902	0.243617	-0.194992	-0.0424006	-0.327632	0.303948	-0.11656	-0.0578598	0.0583408	-0.0786212	-0.23955	0.157657	-0.143014	0.0893364	0.162831	0.361918	-0.192189	0.0784191	0.126155	-0.0365431	-0.15226	0.227269	-0.011173	-0.0334972	-0.0119537	0.0340834	-0.16417
11.75	-0.025354	-0.0653953	-0.439051	-0.262534	0.150015	-0.247841	-0.162437	-0.160043	-0.0748179	0.34684	0.026075	-0.0673641	-0.0951799	-0.150191	-0.160542	-0.0933691	-0.132942	-0.140658	-0.135684	0.116308	0.254379	-0.161181	-0.0921855	-0.297599	0.189431	0.0272126	0.0282634	0.0750077	-0.0552405	-0.185918	0.00485772	-0.088064	0.10062	0.159912	0.298245	-0.206145	-0.0969328	-0.0588754	0.023575	-0.101312	0.0788184	-0.0380733	0.0123989	-0.111833	0.0667043	-0.174599
12	0.00449947	-0.22019	-0.655076	-0.251202	0.105444	-0.267001	-0.134343	-0.00922352	0.130997	0.398989	0.18923	-0.151008	0.0223443	-0.141093	-0.122653	-0.101441	-0.0381531	-0.181499	-0.18291	0.076558	0.128482	-0.139491	-0.114923	-0.335987	0.195572	0.231116	0.133592	0.112313	0.0109977	-0.0875593	-0.0753486	-0.0963059	0.205827	0.159784	0.250384	-0.178373	-0.177383	-0.176002	0.0761176	0.0121078	-0.0978149	0.00593184	-0.00350666	-0.102237	0.0340834	-0.056231
12.25	0.0720475	-0.206621	-0.721534	-0.217229	0.146806	-0.247841	-0.0962537	0.0706894	0.212585	0.403723	0.280296	-0.122849	0.102257	-0.0802774	-0.0957639	-0.0510638	-0.037862	-0.256285	-0.102176	0.096486	-0.0627073	-0.142744	-0.0623385	-0.380212	0.266527	0.304934	0.116994	0.138835	0.0662263	-0.0244631	0.000450866	-0.0495978	0.275461	0.167725	0.213937	-0.139215	-0.206383	-0.2274	0.106035	0.0848659	-0.223014	0.0369763	-0.0613791	-0.0119537	-0.0651588	0.220032
12.5	0.082281	-0.0789643	-0.666436	-0.178198	0.183219	-0.205187	-0.0583747	0.0946552	0.192044	0.397491	0.190453	-0.0420622	0.100495	-0.00468794	-0.0997969	-0.0116861	-0.0415565	-0.257263	0.03081	0.150261	-0.162642	-0.142744	0.0536627	-0.385918	0.340707	0.204083	-0.00619081	0.144732	0.0471157	-0.0875593	0.102094	0.0992421	0.242687	0.201275	0.145796	-0.139215	-0.19232	-0.22176	0.106017	0.073953	-0.320654	0.0200953	-0.0452786	0.0521184	-0.164892	0.467826
12.75	-0.00378572	0.0116311	-0.480173	-0.221748	0.1826	-0.154567	-0.0166255	0.0948492	0.114629	0.387798	0.0529414	0.0405508	0.0262011	-0.0502361	-0.0997969	-0.0130236	-0.0249844	-0.100834	0.0643251	0.171371	-0.0543378	-0.136242	0.0419837	-0.383251	0.352315	0.0545387	-0.0802726	0.167416	0.0471157	-0.132285	0.16384	0.176672	0.119754	0.136927	0.119859	-0.153175	-0.132279	-0.154972	0.0877798	0.135798	-0.366935	0.0313626	0.0426369	-0.0119537	-0.156149	0.398199
13	-0.110992	-0.0789643	-0.266424	-0.251181	0.170603	-0.116016	-0.0129607	-0.00949344	-0.0115507	0.265939	-0.0622872	0.0912857	-0.0109338	-0.135172	-0.0231682	-0.0755297	-0.0821909	0.148447	-0.0264625	0.205722	0.141159	-0.161181	-0.0733882	-0.299618	0.298695	-0.108691	-0.0791405	0.197245	0.0725905	-0.078109	0.229795	0.0910119	0.0584774	0.0186219	0.118844	-0.139219	0.0112515	0.00608023	0.0395475	0.271029	-0.261343	0.0907872	0.0916141	-0.111833	-0.0242863	0.111492
13.25	-0.159496	-0.22019	0.0231608	-0.174908	0.173276	-0.0886541	-0.0754844	-0.157161	-0.028225	0.092495	-0.11099	0.173535	-0.0327338	-0.123255	0.0945212	-0.15721	-0.183811	0.252839	-0.102176	0.314673	0.308292	-0.194992	-0.0813147	-0.116027	0.177383	-0.198756	-0.0389425	0.196674	-0.0251204	0.0291693	0.231871	-0.0880757	0.0952869	-0.102661	0.186725	-0.120527	0.164563	0.170319	-0.00813935	0.260131	-0.0726687	0.119471	0.0364129	-0.156699	0.125074	-0.0353741
13.5	-0.204655	-0.283629	0.274979	-0.0310857	0.102033	-0.107814	-0.138008	-0.238057	-0.0396846	-0.0405552	-0.211439	0.248979	-0.0241852	-0.0729588	0.198045	-0.172617	-0.13824	0.195073	-0.120618	0.465677	0.289643	-0.191744	0.0675033	-0.016944	-0.00997631	-0.228818	-0.0413885	0.177128	-0.157597	0.0644316	0.149597	-0.220444	0.16885	-0.192593	0.209462	-0.155469	0.175822	0.181696	-0.0380125	0.073953	0.0106674	0.0516325	0.00739031	-0.111833	0.224304	0.062737
13.75	-0.2522	-0.297198	0.39479	0.0914249	-0.0503367	-0.181929	-0.089145	-0.218113	-0.156237	-0.0766955	-0.364009	0.207295	-0.0723153	-0.0363887	0.167354	-0.0670709	0.000445866	0.134976	-0.164173	0.496784	0.1416	-0.142744	0.207429	-0.109946	-0.199487	-0.212265	-0.0628467	0.19401	-0.180986	0.0828017	-0.00731022	-0.0803192	0.347803	-0.1332	0.123332	-0.206145	0.0592246	0.0256273	0.00691124	-0.0904149	-0.0195573	-0.0513881	0.0939203	-0.0119537	0.256925	0.230475
14	-0.331228	-0.297198	0.302486	0.125135	-0.148145	-0.243743	0.000694753	-0.108183	-0.180407	-0.0273545	-0.405709	0.0721654	-0.153333	-0.0220445	0.0832893	0.113426	0.0588238	0.166411	-0.159442	0.334495	0.0448214	-0.0688056	0.235114	-0.279761	-0.182926	-0.156772	-0.0758504	0.248281	-0.127477	0.0738818	-0.154832	0.254089	0.628799	0.0983672	-0.0243761	-0.173644	-0.0348031	-0.111637	0.0789377	-0.0904149	-0.0255657	-0.148449	0.225272	0.0521184	0.291416	0.230475
14.25	-0.479733	-0.297198	0.0977425	0.0674663	-0.140893	-0.243743	0.00781384	0.0182874	0.0273619	0.033607	-0.222528	-0.0620473	-0.138201	-0.00478326	0.0418305	0.238541	0.127079	0.233871	-0.0784191	0.072666	0.0505209	-0.0349938	0.196371	-0.39327	0.055217	-0.050572	-0.0359794	0.295502	-0.0849853	0.0828017	-0.1997	0.520598	0.810597	0.319167	-0.101011	-0.0771613	-0.0745983	-0.153291	0.106533	0.0121078	0.0193188	-0.186428	0.242205	-0.0119537	0.216052	0.0523085
14.5	-0.601381	-0.297198	-0.085164	-0.0549539	-0.0927161	-0.205187	-0.120688	0.0144822	0.146112	0.0804591	-0.00990917	-0.193816	-0.009175	0.0815356	0.0684937	0.233036	0.287393	0.189664	0.069056	-0.0903178	0.00213991	-0.0503689	0.101286	-0.346578	0.275618	-0.00469763	-0.065425	0.291971	-0.0913585	0.127514	-0.157312	0.386457	0.626279	0.354342	-0.0877692	0.0154872	-0.0979708	-0.128912	0.106083	0.146711	-0.0303529	-0.122004	0.0900646	-0.111833	0.0836984	-0.104986
14.75	-0.529122	-0.297198	-0.172247	-0.12203	-0.0377702	-0.154567	-0.234956	-0.0821589	0.0413373	0.0934036	0.0563286	-0.281931	0.104483	0.172091	0.0528364	0.181319	0.42437	0.0968098	0.215739	-0.0268643	-0.125464	-0.0872469	-0.0307173	-0.160736	0.343341	0.00871501	-0.12648	0.258773	-0.0913585	0.18116	-0.147476	0.0987684	0.235856	0.25831	-0.0468332	0.0287791	-0.0899332	-0.044941	0.110367	0.187373	-0.104196	-0.00711762	-0.102079	-0.102237	-0.0564165	-0.16417
15	-0.31007	-0.22019	-0.224243	-0.0464796	0.0269108	-0.116016	-0.231086	-0.142948	-0.159869	0.114844	0.0144269	-0.225895	0.163286	0.158546	-0.0231625	0.103622	0.405496	0.0481142	0.344772	0.13045	-0.124701	-0.117805	-0.101082	-0.00993865	0.369772	-0.0136473	-0.142626	0.205045	-0.0425031	0.136978	-0.222556	-0.110093	-0.0431076	0.154425	-0.092517	0.0106114	-0.061253	0.0250281	0.0765449	0.208556	-0.0817497	0.0505556	-0.207207	-0.0119537	-0.164892	-0.174599

## Sheet: Figure 2Bi
Precue poke onset (sec)	Up																		Down
-7	-0.0517859	-0.19464	-0.0691766	0.130318	-0.035215	-0.0209697	-0.0853817	-0.0864557	-0.0761169	0.154084	-0.312985	-0.0969969	-0.197987	-0.0197866	-0.00711376	0.161126	-0.123452	-0.0322181	0.10345	0.0417602	0.0372626	-0.080428	0.0827125	-0.0229783	-0.274917	-0.0463486	-0.0809558	0.138699	0.165113	-0.0640529	0.0510042	0.0452875	0.0564809	-0.0732824	-0.0191607	-0.0251819	-0.0978659	0.169634	0.0861513	0.00213447	-0.166591	-0.0661803	0.177022
-6.75	-0.106139	-0.228979	-0.126297	0.130459	-0.01532	-0.0372288	-0.149477	-0.0967538	-0.0233036	0.135855	-0.272169	-0.0855576	-0.155201	-0.0269632	-0.0896112	0.0682572	-0.167206	-0.0140777	0.141613	0.0052229	-0.0308307	-0.110551	0.105907	-0.0429809	-0.257159	-0.0881816	-0.121815	0.100186	0.150633	-0.117274	0.0924108	0.138677	0.137886	-0.0434283	-0.000920023	-0.0377587	-0.0964373	0.219647	0.0596398	-0.0646074	-0.19848	-0.0365993	0.124266
-6.5	-0.117868	-0.222337	-0.147855	0.146836	0.00063146	-0.0969169	-0.218316	-0.108516	-0.00352346	0.0848243	-0.137681	-0.114303	-0.135162	-0.0630586	-0.138887	-0.0500808	-0.157657	0.0319153	0.151779	-0.0607238	-0.0631926	-0.0713934	0.143886	-0.068411	-0.27179	-0.114978	-0.128922	0.113522	0.0317919	-0.0925208	0.0181022	0.187637	0.181582	-0.0221194	-0.0350252	-0.0268962	-0.0217825	0.198167	-0.0429114	0.00213447	-0.180993	-0.0298924	0.102645
-6.25	-0.0724924	-0.162603	-0.141914	0.125555	0.0426309	-0.0899247	-0.224001	-0.0919323	-0.0100867	0.0626646	-0.0388885	-0.15622	-0.167144	-0.0639647	-0.152342	-0.129803	-0.121711	0.0200656	0.116489	-0.105146	-0.0853071	-0.0105237	0.16226	-0.0930342	-0.276909	-0.119553	-0.0907123	0.105387	-0.0617299	-0.0245621	-0.0102504	0.179947	0.179719	-0.0200794	-0.066246	0.0245305	0.0345588	0.134667	-0.128443	0.105278	-0.096483	-0.0317837	0.0980208
-6	-0.0128946	-0.0895024	-0.075103	0.0721983	0.117921	-0.00612594	-0.161773	-0.0755106	-0.0311734	0.0987451	-0.0274816	-0.153138	-0.21629	-0.0643567	-0.172359	-0.134808	-0.0954942	-0.0527674	0.0698566	-0.099783	-0.0869711	-0.0103435	0.101022	-0.0856254	-0.248041	-0.0940499	-0.04762	-0.0166012	-0.0379622	-0.00574794	0.067017	0.168616	0.182908	-0.0114036	-0.0550037	0.0931075	0.0691277	0.111863	-0.160625	0.141671	0.0141052	-0.0798388	0.0980208
-5.75	0.0151857	-0.0868284	0.0253952	-0.013238	0.136994	0.0545369	-0.0882591	-0.100298	-0.0726725	0.144384	-0.128871	-0.11447	-0.2281	-0.0919577	-0.19153	-0.0458057	-0.101093	-0.118418	0.0338337	-0.0828891	-0.0728172	-0.0271168	0.00267763	-0.0723624	-0.205591	-0.043719	-0.0285357	-0.138721	0.0439101	-0.0300487	0.148651	0.185829	0.207514	0.0173933	-0.00567565	0.127033	0.121321	0.160996	-0.166295	0.0988564	0.0614056	-0.143714	0.0717758
-5.5	0.0085806	-0.159289	0.0757582	-0.104389	0.0512499	0.0365302	-0.0891289	-0.140443	-0.124277	0.149747	-0.237067	-0.0586799	-0.216803	-0.119959	-0.217753	0.0743314	-0.14494	-0.13528	0.00686292	-0.083178	-0.0799135	-0.029129	-0.0506676	-0.105116	-0.184036	0.0408594	0.00236957	-0.163146	0.0641587	-0.0322355	0.140311	0.237064	0.249979	0.0440437	0.0372957	0.119913	0.152447	0.193168	-0.166295	0.0449488	-0.0148763	-0.20718	0.0236441
-5.25	-0.0285584	-0.247969	0.0471286	-0.118306	-0.0442705	0.0209641	-0.152491	-0.160406	-0.139617	0.146637	-0.292404	-0.0361956	-0.205226	-0.119873	-0.204504	0.143451	-0.193347	-0.138309	0.0206021	-0.0557823	-0.12099	-0.0151353	-0.0264054	-0.191919	-0.189293	0.0708598	0.0670496	-0.126887	0.0329987	-0.0385936	0.0844558	0.308195	0.294113	0.0484798	0.019055	0.125252	0.115629	0.133783	-0.166295	-0.0342582	-0.0995679	-0.278138	-0.00723194
-5	-0.0981735	-0.291102	-0.00209238	-0.0690469	-0.0886697	0.0684256	-0.188218	-0.15686	-0.133139	0.141178	-0.282392	-0.0728844	-0.178152	-0.0876391	-0.112596	0.177273	-0.193602	-0.155093	0.101154	0.00613211	-0.121387	0.0278847	0.0334447	-0.219526	-0.206376	0.0192729	0.0673054	-0.108413	-0.0186429	-0.0781842	0.0615095	0.371806	0.316206	0.0432854	-0.0280302	0.156093	0.0173987	0.0194959	-0.166295	-0.107413	-0.0666739	-0.303184	-0.00260087
-4.75	-0.185887	-0.315035	-0.0485629	-0.0557923	-0.0786315	0.103459	-0.164656	-0.152297	-0.142148	0.140124	-0.222283	-0.0876757	-0.126214	-0.063288	-0.0187321	0.219751	-0.171427	-0.153554	0.210884	0.0711507	-0.0787224	0.0689571	0.0960519	-0.167878	-0.22185	-0.0726439	-0.0218977	-0.0829168	-0.044411	-0.0928514	0.0703748	0.360774	0.279211	0.0425721	-0.0550037	0.152668	-0.0643015	-0.0347045	-0.166295	-0.137393	0.0346683	-0.24185	-0.0288459
-4.5	-0.202006	-0.334603	-0.0733899	-0.0534812	-0.05578	0.052015	-0.130933	-0.157825	-0.163473	0.156151	-0.175168	-0.0798905	-0.0642319	-0.0169391	-0.00534651	0.220038	-0.173285	-0.114482	0.255226	0.133752	-0.0371462	0.0642195	0.163964	-0.082379	-0.238989	-0.140078	-0.124781	0.0444663	-0.0383938	-0.0588816	0.109126	0.27298	0.203502	0.0387795	-0.0415153	0.0919003	-0.105786	-0.0153392	-0.166295	-0.143805	0.157233	-0.102607	-0.112478
-4.25	-0.129178	-0.290871	-0.0683428	0.0375218	-0.0400447	-0.00364782	-0.100224	-0.163299	-0.14795	0.211401	-0.143804	-0.0827831	-0.0178114	-0.0224757	-0.0531605	0.170265	-0.170438	-0.0288316	0.205678	0.20683	0.00102635	0.0436506	0.266366	-0.0245509	-0.271228	-0.139241	-0.225003	0.162801	-0.0692021	-0.0699248	0.128828	0.184009	0.15143	0.0126054	-0.0302696	0.0323785	-0.124556	0.0713112	-0.166295	-0.143805	0.227518	-0.00725268	-0.12974
-4	-0.0610931	-0.206603	-0.0708406	0.188065	-0.0592485	-0.00300627	-0.0502992	-0.151388	-0.0882438	0.26328	-0.0803746	-0.0781155	0.0169948	-0.103302	-0.0997663	0.0601181	-0.141482	0.0353731	0.0864313	0.229968	0.0775587	0.0704561	0.345316	0.0115281	-0.305574	-0.0698362	-0.293212	0.200266	-0.0985344	-0.158778	0.102852	0.135385	0.122855	-0.0114013	-0.0438914	-0.000899063	-0.0956831	0.129677	-0.166295	-0.107413	0.192375	0.0294115	-0.00723194
-3.75	-0.0331144	-0.168513	-0.088398	0.306913	-0.109528	0.000370096	0.0217562	-0.125843	-0.0265178	0.29297	0.0116386	-0.0739354	0.0341018	-0.172541	-0.0875889	-0.0208796	-0.0925786	0.00937463	-0.018574	0.190411	0.131497	0.100909	0.350679	0.0220099	-0.322472	0.0154528	-0.281594	0.192106	-0.0534795	-0.238636	-0.00265918	0.112897	0.0896968	-0.0369989	-0.0708648	0.00688745	-0.012763	0.0678891	-0.166295	-0.0406707	0.0613968	0.024866	0.146159
-3.5	-0.00790821	-0.195618	-0.0645473	0.271853	-0.139499	-0.0144605	0.0537914	-0.110333	0.00779074	0.273179	-0.0379774	-0.0944867	0.00725581	-0.151879	-0.00502193	-0.0206544	-0.0530574	-0.0651442	-0.0709476	0.118976	0.062551	0.0674698	0.258121	-0.0398798	-0.31937	0.0406814	-0.195019	0.236284	0.0608461	-0.21067	-0.0875204	0.13133	0.0888979	-0.0834337	-0.093216	0.0580084	0.0728577	-0.0210079	-0.166295	0.0021436	-0.107805	0.0205687	0.172404
-3.25	0.0287267	-0.240125	-0.0133381	0.144239	-0.151811	-0.0337917	0.0303905	-0.124877	0.00716097	0.195325	-0.202695	-0.164005	-0.0564113	-0.0737531	0.0637601	0.0113364	-0.0251627	-0.0725351	-0.0905126	0.0651121	-0.0528427	-0.0321481	0.16157	-0.109918	-0.328288	0.0269256	-0.131749	0.287445	0.149532	-0.132662	-0.101877	0.170859	0.125012	-0.130833	-0.109081	0.081144	0.0761834	-0.0207797	-0.166295	-0.0406707	-0.227461	0.0046392	0.0887653
-3	0.0856099	-0.287345	0.00329317	0.0261947	-0.179908	-0.0789846	0.00340413	-0.157826	-0.0434834	0.0921644	-0.288356	-0.209794	-0.103194	0.0062567	0.0415822	0.0404118	-0.0145726	-0.00924896	-0.0907614	0.0310601	-0.0975099	-0.122056	0.122412	-0.105648	-0.344398	0.0442102	-0.09149	0.269479	0.151373	-0.0657313	-0.0947387	0.239913	0.207739	-0.147493	-0.0710016	0.0686493	0.00919829	0.0536086	-0.166295	-0.107413	-0.248024	0.0133436	0.0282686
-2.75	0.167806	-0.318342	-0.0410014	-0.0575857	-0.210555	-0.0805114	0.0271779	-0.161426	-0.0996088	0.0299136	-0.216373	-0.155043	-0.104106	0.085449	-0.01525	0.0701585	-0.0535847	0.0499889	-0.0825911	0.0182437	-0.101296	-0.137269	0.130202	-0.0802139	-0.346263	0.0614757	-0.0135942	0.237134	0.130711	-0.0282231	-0.0908139	0.337505	0.329433	-0.140725	0.0349162	0.0859663	-0.0365763	0.0985091	-0.134113	-0.101	-0.180993	0.0594011	-0.0242214
-2.5	0.213323	-0.271746	-0.0953984	-0.113398	-0.180002	-0.0155343	0.0939908	-0.130351	-0.114456	0.0654726	-0.100122	-0.0444784	-0.0754658	0.15841	-0.0483294	0.0917443	-0.0879499	0.0211018	-0.0808688	0.00248007	-0.143909	-0.105535	0.118653	-0.10346	-0.34124	0.0588653	0.0807519	0.216308	0.10025	-0.0201937	-0.0909534	0.418384	0.418732	-0.135418	0.127216	0.129587	-0.0287015	0.0882942	-0.0750935	-0.00427808	-0.102467	0.0433434	-0.112478
-2.25	0.20965	-0.205866	-0.148592	-0.106841	-0.113489	0.0290526	0.129507	-0.103894	-0.068695	0.168991	-0.0465172	-0.00263187	-0.038644	0.15084	-0.024525	0.0247164	-0.0997953	-0.0755592	-0.0804361	-0.0469465	-0.163159	-0.0535558	0.115037	-0.132734	-0.342796	0.10194	0.159079	0.160809	0.0199294	-0.0541673	-0.0626173	0.390332	0.389041	-0.147748	0.138321	0.145739	-0.00788483	0.0367017	-0.00505068	0.105278	-0.046934	-0.0639127	-0.155985
-2	0.201737	-0.193396	-0.195526	-0.0484321	-0.081735	-0.0682095	0.121337	-0.105826	-0.0230227	0.213649	-0.069561	-0.0257017	0.0507643	0.103881	0.0487636	-0.0853623	-0.130696	-0.169902	-0.0798884	-0.121907	-0.182059	-0.0132674	0.103536	-0.155329	-0.340417	0.173214	0.1769	0.0559277	-0.0207198	-0.102586	-0.0357653	0.270423	0.258587	-0.162968	0.100102	0.130635	-0.0356118	-0.0187937	0.0161084	0.141671	-0.032359	-0.17103	-0.107854
-1.75	0.215074	-0.244474	-0.197322	-0.0484286	-0.113485	-0.206774	0.103248	-0.114898	0.00194241	0.151259	-0.121182	-0.0343687	0.148097	0.0431403	0.107062	-0.150915	-0.183242	-0.204135	-0.076739	-0.157199	-0.28023	-0.00762219	0.0436718	-0.223636	-0.322416	0.21251	0.140184	-0.0624413	0.0372827	-0.095173	-0.0334315	0.181195	0.155777	-0.163624	0.0959881	0.123458	-0.106183	-0.0579639	0.0271314	0.0988564	0.0085944	-0.175193	-0.0334704
-1.5	0.227717	-0.254615	-0.124226	-0.137127	-0.142458	-0.236797	0.145353	-0.112004	0.0388826	0.0532188	-0.144028	-0.012936	0.161397	-0.0379131	0.109409	-0.160142	-0.191583	-0.167621	-0.0713215	-0.144416	-0.412099	-0.0277556	-0.0534406	-0.316586	-0.318199	0.147708	0.0540306	-0.127955	0.11249	-0.0180216	-0.0602687	0.155931	0.133045	-0.156249	0.100239	0.111668	-0.153174	-0.076551	0.021779	0.0449488	0.104776	-0.120942	0.0190197
-1.25	0.209777	-0.220227	-0.0609116	-0.211103	-0.167749	-0.170118	0.250903	-0.0993889	0.0651433	-0.0109669	-0.103555	0.0326172	0.0698765	-0.120945	0.10127	-0.151913	-0.147113	-0.106338	-0.0487923	-0.151265	-0.449437	-0.0283412	-0.12292	-0.361877	-0.335772	0.0805323	-0.0189323	-0.135365	0.120494	0.0670818	-0.0516268	0.168648	0.155641	-0.166258	0.0801303	0.0668426	-0.115278	-0.0846372	-0.00505068	-0.0342582	0.212943	-0.0526604	0.0625203
-1	0.23508	-0.174849	-0.0332595	-0.234028	-0.187995	-0.0790138	0.378214	-0.0555518	0.0544068	0.0233557	-0.00648787	0.0622826	-0.0161807	-0.190657	0.151826	-0.169327	-0.0895586	-0.0458288	-0.0309757	-0.154953	-0.346405	0.0146365	-0.0955235	-0.317827	-0.350428	0.0483161	-0.0161535	-0.110319	0.0795698	0.10159	0.0218133	0.155959	0.148198	-0.214851	0.0214278	0.0261954	-0.0220431	-0.0520014	-0.0372408	-0.107413	0.227518	-0.000172941	0.128897
-0.75	0.283792	-0.112649	-0.0549041	-0.216007	-0.174939	0.0547961	0.523512	0.0184497	0.0411838	0.169559	0.0457779	0.0950794	-0.0102126	-0.199067	0.260611	-0.186407	-0.0420177	-0.00348924	0.0178856	-0.0932521	-0.182997	0.0806725	-0.00705835	-0.209697	-0.349988	0.0352163	0.0131024	-0.083976	0.0649986	0.0253892	0.0707721	0.092879	0.0763341	-0.309932	-0.0145452	-0.00232674	0.0361113	-0.0356617	-0.0429114	-0.137393	0.192194	-0.000169514	0.119907
-0.5	0.418743	-0.0219596	-0.0593102	-0.0953766	-0.123273	0.169435	0.810074	0.0723813	0.0595758	0.341812	0.0675897	0.19981	0.0829144	-0.143467	0.34494	-0.136389	0.0315713	0.0375042	0.0897572	-0.0371797	-0.0605322	0.102379	-0.0176522	-0.129685	-0.368776	0.0423526	-0.0173083	-0.101972	0.10137	-0.0651657	-0.00145319	-0.0143991	-0.0402415	-0.426395	-0.0255174	-0.0222573	-0.0301769	-0.105606	-0.0315621	-0.143805	0.198532	-0.0727522	0.0190197
-0.25	0.650622	0.154963	0.0331265	0.125558	0.0540209	0.172612	1.24276	0.0623437	0.0789404	0.436861	0.136644	0.390495	0.216664	-0.046321	0.368187	0.00658879	0.162904	0.110944	0.0852472	-0.133481	-0.0872616	-0.0180445	-0.269234	-0.214851	-0.439532	0.0938812	-0.0886523	-0.194031	0.0817381	-0.127726	-0.173241	-0.113699	-0.132759	-0.508056	-0.0573764	-0.0292815	-0.129174	-0.263672	-0.0750935	-0.143805	0.184138	-0.200747	-0.103229
0	0.808244	0.399565	0.191904	0.27186	0.338704	0.0890017	1.55988	0.0248296	0.131603	0.506709	0.24957	0.480708	0.344386	0.0701804	0.331478	0.145341	0.321574	0.186736	-0.0707569	-0.382554	-0.343619	-0.22372	-0.690568	-0.554787	-0.540317	0.146487	-0.110078	-0.324757	-0.0345831	-0.16297	-0.319486	-0.19231	-0.199352	-0.510207	-0.109081	-0.0636537	-0.177176	-0.376701	-0.134113	-0.143805	0.0408337	-0.257403	-0.18223
0.25	0.684677	0.626459	0.281344	0.274026	0.484158	0.0397461	1.44379	0.0451057	0.276308	0.648918	0.264533	0.342857	0.418282	0.223236	0.355466	0.180227	0.438666	0.202043	-0.249738	-0.666816	-0.748946	-0.339679	-0.972107	-1.01844	-0.616503	0.13912	-0.0998171	-0.377422	-0.16282	-0.217189	-0.333272	-0.24651	-0.244885	-0.432347	-0.147296	-0.0900115	-0.180009	-0.324558	-0.160625	-0.143805	-0.146032	-0.22565	-0.155985
0.5	0.39435	0.747938	0.292494	0.274016	0.301962	-0.0111957	1.02984	0.166488	0.484183	0.795275	0.110719	0.136821	0.410009	0.324724	0.48154	0.124925	0.463538	0.165491	-0.287755	-0.84421	-1.08457	-0.241933	-0.976672	-1.35561	-0.623566	0.0606366	-0.134082	-0.317314	-0.20667	-0.264404	-0.251832	-0.274503	-0.274989	-0.332658	-0.160781	-0.0819143	-0.164891	-0.180061	-0.134113	-0.107413	-0.241863	-0.157365	-0.0643464
0.75	0.143748	0.743933	0.280299	0.339789	-0.00181163	-0.092025	0.633485	0.375397	0.684583	0.87132	-0.0512224	0.0319978	0.398139	0.26659	0.59598	0.0506476	0.389657	0.152795	-0.17858	-0.804009	-1.20734	-0.0398063	-0.787605	-1.44397	-0.563097	-0.0343677	-0.160962	-0.203619	-0.171654	-0.278486	-0.149103	-0.289604	-0.295753	-0.2534	-0.163157	-0.0585183	-0.159195	-0.0675416	-0.0750935	0.0321146	-0.209974	-0.123348	0.0236507
1	0.00831014	0.676244	0.258853	0.325875	-0.138443	-0.135426	0.387058	0.606569	0.848787	0.829738	-0.117751	-0.0222151	0.373956	0.0637139	0.564921	0.00231025	0.253927	0.161797	-0.0227481	-0.583088	-1.13542	0.113815	-0.559629	-1.3283	-0.493609	-0.0909267	-0.128677	-0.0905086	-0.163326	-0.263972	-0.0782743	-0.291564	-0.294466	-0.212277	-0.163157	-0.0443391	-0.160415	0.00584442	-0.0372328	0.208413	-0.140517	-0.121077	0.0100302
1.25	0.00423771	0.570609	0.231463	0.14617	-0.169501	-0.129504	0.276211	0.795663	0.989131	0.746817	-0.134694	-0.0701631	0.306264	-0.105852	0.448186	0.0770468	0.0838608	0.122223	0.0692211	-0.331626	-0.942691	0.1507	-0.36803	-1.08526	-0.468836	-0.0766545	-0.0824579	-0.00308755	-0.197083	-0.227194	-0.0247762	-0.278705	-0.272549	-0.193817	-0.163157	-0.058136	-0.14415	0.0615155	-0.0750935	0.251227	-0.110876	-0.113859	-0.055357
1.5	0.068227	0.487814	0.205896	-0.0364532	-0.186855	-0.121392	0.252525	0.895207	1.08382	0.660411	-0.166881	-0.0824846	0.212128	-0.146997	0.375429	0.203144	-0.07733	0.0236397	0.0790127	-0.212713	-0.741178	0.12722	-0.258094	-0.82169	-0.482162	-0.015472	-0.0571258	0.027717	-0.153339	-0.217142	0.0232414	-0.253312	-0.248829	-0.171251	-0.163157	-0.0755472	-0.111877	0.0967647	-0.134113	0.135249	-0.186981	-0.123348	-0.103229
1.75	0.123237	0.442502	0.201398	-0.136331	-0.154952	-0.174695	0.274187	0.859294	1.04198	0.57427	-0.204607	-0.0612834	0.146505	-0.158649	0.38673	0.23226	-0.209838	-0.0654309	0.0611227	-0.183383	-0.593155	0.121072	-0.191411	-0.590873	-0.484129	0.0785001	-0.0634592	0.0303361	-0.0374079	-0.212384	0.0321242	-0.227203	-0.226476	-0.13601	-0.163157	-0.0748798	-0.0715408	0.124703	-0.160625	0.0385271	-0.216317	-0.125243	-0.0862331
2	0.191029	0.403807	0.188055	-0.143825	-0.0748662	-0.233116	0.293807	0.629196	0.793815	0.538728	-0.205064	-0.0532728	0.129826	-0.204851	0.418482	0.16434	-0.28896	-0.113625	0.0505768	-0.147922	-0.461148	0.134153	-0.14023	-0.402525	-0.468257	0.193869	-0.0620149	0.0467592	0.0363406	-0.183725	0.0285036	-0.208121	-0.208819	-0.104506	-0.163157	-0.0700231	-0.0518775	0.20641	-0.166295	0.0149687	-0.0963101	-0.109697	0.0236441
2.25	0.286624	0.328483	0.1585	-0.104245	-0.0236957	-0.25603	0.256718	0.337693	0.513279	0.577721	-0.139942	-0.0869841	0.174974	-0.222661	0.416324	0.165682	-0.283993	-0.107148	0.0415091	-0.0998292	-0.318002	0.110174	-0.0795573	-0.246819	-0.452411	0.254441	-0.0391585	0.0751257	0.0512642	-0.171529	0.0458101	-0.198554	-0.199549	-0.0884531	-0.163157	-0.0943777	-0.0691026	0.277905	-0.166295	-0.0406707	0.0583251	0.0180207	0.115283
2.5	0.357092	0.207607	0.121756	-0.0649424	-0.0698443	-0.205046	0.145833	0.161637	0.357025	0.612292	-0.0900492	-0.143743	0.189107	-0.185181	0.339614	0.185623	-0.234751	-0.0306957	0.0105545	-0.0664114	-0.169903	0.0458832	0.0102195	-0.126358	-0.433496	0.191401	0.0181204	0.0835598	0.0371923	-0.231266	0.0846559	-0.21198	-0.213846	-0.0592397	-0.163157	-0.149028	-0.0980512	0.250575	-0.166295	-0.107413	0.119183	0.184475	0.150517
2.75	0.348687	0.122295	0.0556362	-0.05334	-0.107959	-0.100994	0.0279537	0.127031	0.309641	0.537516	-0.109018	-0.188139	0.120706	-0.118486	0.270951	0.113705	-0.187374	0.0950579	-0.0376707	-0.00765843	-0.034851	0.0133259	0.146103	-0.0154594	-0.412759	0.071116	0.0871747	0.0631688	0.0332022	-0.248092	0.119847	-0.231912	-0.23253	-0.000479982	-0.149672	-0.194421	-0.0899175	0.181929	-0.166295	-0.137393	0.098615	0.216472	0.115276
3	0.315755	0.0800122	-0.0126528	-0.0764071	-0.0635558	0.0335627	-0.0227286	0.109887	0.252599	0.376348	-0.177437	-0.17424	0.00168147	-0.0589673	0.286962	0.0216234	-0.202792	0.169908	-0.0870234	0.0618954	0.0257522	0.0235354	0.198326	0.0444848	-0.396059	-0.0200075	0.106045	0.043314	-0.0178686	-0.185555	0.115553	-0.232393	-0.23894	0.0474086	-0.124942	-0.213031	-0.0678142	0.163222	-0.166295	-0.107413	0.0385851	0.0409305	0.0545202
3.25	0.276733	0.0449853	-0.0226618	-0.143684	-0.00364952	0.128945	-0.037267	0.0787058	0.193215	0.25068	-0.201232	-0.149034	-0.103381	-0.0157839	0.363746	-0.00328245	-0.256958	0.129957	-0.127549	0.0875097	-0.00375686	0.0400274	0.1376	0.0289175	-0.390078	-0.0631299	0.0800061	0.0981842	-0.0721512	-0.133362	0.110123	-0.216146	-0.232719	0.0562805	-0.109077	-0.202854	-0.0853683	0.252661	-0.134113	-0.00427808	-0.116873	-0.182418	-0.0550975
3.5	0.205148	0.00195394	-0.0231701	-0.185721	0.0134558	0.113744	-0.0744106	0.0526192	0.146974	0.225095	-0.147668	-0.16761	-0.129855	0.0150629	0.378481	-0.0153718	-0.291947	0.0759702	-0.168345	0.0734052	-0.0432441	0.0162607	0.0489829	-0.0079936	-0.407704	-0.0495213	0.0517864	0.150547	-0.0497186	-0.139224	0.111137	-0.215748	-0.22521	0.0385957	-0.0979717	-0.190081	-0.125776	0.378845	-0.0750935	0.105278	-0.248202	-0.275089	-0.16061
3.75	0.121494	0.00452581	-0.0805649	-0.14614	-0.00810964	0.0225534	-0.117058	0.019414	0.106589	0.233478	-0.115521	-0.207045	-0.116458	0.013282	0.309562	-0.0497605	-0.319174	0.0731778	-0.20797	0.0770095	-0.0602088	-0.0138398	0.0350954	-0.0317083	-0.445939	-0.029307	0.016253	0.0747981	-0.00196232	-0.158118	0.0824843	-0.233457	-0.223587	0.0263271	-0.073241	-0.20114	-0.148627	0.44993	-0.0372328	0.105278	-0.224381	-0.239444	-0.203851
4	0.042361	0.0756649	-0.136405	-0.0461175	0.000652445	-0.0556512	-0.119306	-0.0187457	0.0596242	0.190404	-0.155915	-0.212304	-0.0721476	-0.00706213	0.22423	-0.0245289	-0.331428	0.105605	-0.241848	0.131479	-0.0747385	-0.0392603	0.0563488	-0.0393739	-0.451588	-0.0225613	-0.0247493	-0.0998602	-0.0131974	-0.15243	0.0202755	-0.251212	-0.228243	0.0234746	-0.0391358	-0.227912	-0.156759	0.474622	-0.0750935	0.0321146	-0.0849841	-0.121077	-0.186855
4.25	0.00192807	0.124633	-0.153366	-0.00474666	0.0435211	-0.0833051	-0.0642701	-0.0654785	-0.0164644	0.114738	-0.235889	-0.204989	-0.0275617	-0.078076	0.184088	0.0360618	-0.324023	0.143489	-0.260046	0.161025	-0.0918879	-0.0219726	0.00656752	-0.0203197	-0.415908	-0.0577142	-0.0303349	-0.24641	-0.0814119	-0.137535	-0.0102101	-0.26097	-0.233137	0.017556	-0.0485103	-0.236701	-0.160415	0.53181	-0.134113	0.0385271	0.0552402	-0.0274795	-0.138723
4.5	-0.0258405	0.0735607	-0.141961	-0.0485697	0.0306765	-0.0523339	-0.0351596	-0.0955859	-0.0678872	0.107321	-0.244812	-0.191175	-0.00870746	-0.15882	0.203263	0.0389262	-0.29906	0.129123	-0.259242	0.120864	-0.0940112	0.0328115	-0.0415787	0.00691479	-0.373975	-0.0800559	-0.000301401	-0.240709	-0.120223	-0.103665	-0.00152942	-0.257536	-0.234713	0.00940223	-0.0821071	-0.227167	-0.123408	0.631331	-0.160625	0.111691	0.0842173	-0.027618	-0.107847
4.75	-0.075773	-0.0062231	-0.0900643	-0.143688	-0.011871	0.0389362	-0.0858632	-0.101969	-0.0645738	0.169307	-0.213687	-0.162543	-0.029238	-0.196049	0.282391	-0.0373644	-0.266439	0.073564	-0.234381	-0.0032713	-0.0747394	0.0811485	-0.00155379	0.0181402	-0.340865	-0.0399144	0.0549954	-0.145681	-0.104997	-0.0530456	-0.00922009	-0.233649	-0.229485	0.00736796	-0.120189	-0.206983	-0.066925	0.692165	-0.166295	0.105278	0.0756216	-0.0663222	-0.138723
5	-0.143629	-0.0370181	0.00490926	-0.171804	-0.0460087	0.127576	-0.185858	-0.0929507	-0.038411	0.220117	-0.225852	-0.140879	-0.081045	-0.192122	0.355421	-0.140785	-0.206651	-0.0196326	-0.187815	-0.109396	-0.0601626	0.0735479	0.0840334	0.0216436	-0.320706	0.0373258	0.0922461	-0.037434	-0.101034	-0.0292086	-0.0531455	-0.197135	-0.209801	0.00981781	-0.149672	-0.179566	-0.0344602	0.614051	-0.166295	-0.00427808	0.125339	-0.0751617	-0.16061
5.25	-0.161692	-0.0259492	0.104762	-0.115709	-0.0100295	0.142469	-0.249367	-0.0764776	-0.0460679	0.223792	-0.232258	-0.100724	-0.166999	-0.185179	0.371487	-0.200232	-0.141854	-0.10777	-0.144814	-0.109974	-0.0513765	0.0575558	0.128978	0.0418128	-0.327688	0.135154	0.0806535	-0.0196011	-0.0900964	-0.042457	-0.101086	-0.1556	-0.16589	-1.18965e-05	-0.160781	-0.139478	-0.068145	0.4034	-0.166295	-0.101	0.198541	-0.0864072	-0.134099
5.5	-0.132092	-0.0157449	0.172551	-0.0624867	0.0626443	0.087045	-0.232949	-0.0564606	-0.0655316	0.212111	-0.204025	-0.0596391	-0.225827	-0.185263	0.267676	-0.216447	-0.116636	-0.124283	-0.121436	-0.010549	-0.0366334	0.104993	0.103556	0.062325	-0.361745	0.227207	0.0146407	-0.031992	-0.0703897	-0.0290141	-0.132843	-0.0962118	-0.0865499	-0.0290841	-0.163157	-0.0838616	-0.122188	0.215299	-0.134113	-0.137393	0.16049	-0.121081	-0.107847
5.75	-0.131272	-0.0207696	0.188843	-0.044331	0.107541	0.0831405	-0.192379	-0.0444944	-0.0677868	0.210109	-0.137223	-0.0135271	-0.217066	-0.178322	0.0615936	-0.18055	-0.125066	-0.0708987	-0.124753	0.0864245	0.008115	0.163784	0.072254	0.0771229	-0.381513	0.266852	-0.0606009	0.00477075	-0.0565602	-0.0031673	-0.17423	-0.0186278	0.00508971	-0.0844366	-0.149672	-0.00717111	-0.168152	0.178624	-0.0750935	-0.143805	0.0200889	-0.13233	-0.138723
6	-0.17292	-0.0583777	0.132422	0.0187004	0.0803723	0.139051	-0.166465	-0.038113	-0.06313	0.213893	-0.111133	0.00530815	-0.1642	-0.150408	-0.0643504	-0.106957	-0.133342	-0.0132854	-0.129677	0.108273	0.0332635	0.16959	0.0690644	0.0748821	-0.382646	0.244218	-0.101772	0.0336575	-0.085323	0.00335378	-0.276111	0.0437394	0.0534386	-0.135344	-0.124942	0.0792913	-0.199602	0.203489	0.0271314	-0.143805	-0.0872414	-0.11145	-0.186855
6.25	-0.191939	-0.150938	0.0633722	0.102629	-0.00169044	0.157025	-0.131511	-0.0363894	-0.0735324	0.182489	-0.110953	-0.0221236	-0.144746	-0.0963629	-0.0231812	-0.0557347	-0.115403	-0.0108576	-0.103853	0.0769106	0.0489781	0.17286	0.122154	0.0778675	-0.381839	0.180385	-0.120133	-0.0418502	-0.15527	-0.0249832	-0.381178	0.054758	0.0309037	-0.15354	-0.0955922	0.122319	-0.204079	0.144859	0.10731	-0.143805	-0.0903219	-0.109693	-0.208475
6.5	-0.193309	-0.304702	0.00439143	0.0952723	-0.0592135	0.0959287	-0.0835259	-0.0461625	-0.109566	0.109425	-0.108146	-0.0848224	-0.144858	-0.017253	0.0858685	-0.00890597	-0.104384	-0.032633	-0.057805	0.0201955	0.0652753	0.178165	0.186315	0.0916805	-0.384482	0.146566	-0.103351	-0.192463	-0.187725	-0.0496227	-0.387657	0.0578028	0.00421619	-0.155498	-0.073241	0.0893195	-0.180009	0.0669871	0.124012	-0.143805	0.00260628	-0.105016	-0.186855
6.75	-0.18596	-0.402072	-0.0260413	-0.0205982	-0.0863245	0.0357769	-0.0779286	-0.0874241	-0.113692	0.0102439	-0.0752266	-0.120911	-0.114189	0.0539276	0.0882541	0.0305237	-0.110992	-0.0613892	-0.0473427	-0.0295086	0.0472052	0.15766	0.192972	0.0974332	-0.380031	0.103859	-0.0338275	-0.27982	-0.181814	-0.0215195	-0.312141	0.077673	0.0192779	-0.175784	-0.0573764	0.0221532	-0.146516	0.115128	0.0539611	-0.143805	0.142831	-0.116127	-0.138723
7	-0.191742	-0.388164	-0.032063	-0.0996258	-0.123993	0.026385	-0.135512	-0.1259	-0.0654337	-0.046569	0.00171792	-0.100241	-0.0525349	0.0481399	0.0509748	0.0824215	-0.138431	-0.0746555	-0.0994958	-0.0516617	-0.0420313	0.115815	0.141174	0.0379302	-0.365525	0.0486432	0.0516708	-0.261225	-0.160312	-0.000952888	-0.250531	0.0830955	0.0434577	-0.218849	-0.0684853	-0.0241864	-0.117641	0.241304	0.0536348	-0.143805	0.259402	-0.171024	-0.029112
7.25	-0.181745	-0.288171	-0.0399895	0.0047765	-0.128102	0.0317365	-0.179532	-0.114639	-0.0173218	-0.0675778	0.0398309	-0.0335456	0.0165972	-0.0114673	0.00801325	0.0929871	-0.143326	-0.0583224	-0.156518	-0.0448828	-0.119701	0.065998	0.0837351	-0.0639251	-0.338437	0.0272448	0.111912	-0.198573	-0.124761	-0.0392576	-0.225343	0.0469228	0.0412129	-0.262284	-0.0844866	-0.0367507	-0.094722	0.329446	0.156512	-0.143805	0.291464	-0.239444	0.110652
7.5	-0.136739	-0.189632	-0.0585108	0.225719	-0.0803093	0.0107526	-0.155591	-0.095734	-0.0371044	-0.050796	0.0401364	0.0347987	0.0311716	-0.0585753	-0.0451633	0.0575691	-0.137977	-0.0493122	-0.164543	-0.0278953	-0.0955237	0.0473586	0.0620652	-0.113174	-0.310943	0.0601571	0.117785	-0.109714	-0.0742175	-0.126829	-0.177846	0.0109442	0.024152	-0.266183	-0.0438948	-0.00741606	-0.0345337	0.325964	0.247396	-0.143805	0.219104	-0.248422	0.229525
7.75	-0.0780885	-0.146498	-0.04393	0.311299	-0.0283199	-0.00618143	-0.109951	-0.10202	-0.0777081	0.0217103	0.00774333	0.118879	0.00596698	-0.0600402	-0.0976067	0.025626	-0.101558	-0.00715005	-0.119581	-0.0283457	-0.0179092	0.0376967	0.0436263	-0.0988077	-0.293447	0.0859146	0.126563	-0.0201824	-0.0350463	-0.203172	-0.140418	-0.00712404	0.00998542	-0.232902	0.0238107	0.0435089	0.0277135	0.281913	0.327241	-0.107413	0.0408293	-0.211992	0.220529
8	-0.0888379	-0.122576	-0.0203386	0.204297	-0.0420326	0.0107589	-0.0987186	-0.137755	-0.0850345	0.0859041	0.00181969	0.199113	-0.0233941	-0.034977	-0.115966	0.0255839	-0.0173365	0.0699863	-0.0773645	-0.0481949	0.0241085	0.0421963	0.0624515	-0.0511935	-0.306072	0.128624	0.15105	0.0284283	-0.0183786	-0.196075	-0.151993	-0.0238093	-0.00270607	-0.208297	0.0618897	0.0666792	0.0393669	0.275067	0.435471	-0.0406707	-0.139867	-0.159775	0.172131
8.25	-0.156376	-0.0969386	-0.00564762	0.0376595	-0.0788902	0.0347027	-0.122508	-0.166897	-0.0686443	0.0947128	-0.00654762	0.257124	-0.0443429	-0.015786	-0.120594	0.0742347	0.0359923	0.105812	-0.0748043	-0.0985962	-0.026415	-0.0126684	0.0658679	-0.0598907	-0.345786	0.1712	0.129772	-0.0249421	-0.0173919	-0.112148	-0.20553	-0.0552901	-0.0252598	-0.205358	0.0818613	0.0423241	-0.0310678	0.261638	0.414638	0.0021436	-0.241863	-0.137003	0.181646
8.5	-0.220719	-0.0639305	0.000229642	-0.0782041	-0.0815906	0.0451623	-0.113451	-0.185894	-0.0792816	0.0736175	-0.00310517	0.253407	-0.0533335	-0.00452433	-0.117172	0.12713	0.0424915	0.0428199	-0.0887538	-0.158483	-0.128986	-0.111936	-0.0122555	-0.121575	-0.38069	0.155904	0.0561392	-0.0925028	-0.00563039	-0.00275446	-0.222661	-0.0647192	-0.0262202	-0.177243	0.120722	-0.000311919	-0.12219	0.190264	0.203857	-0.0406707	-0.268588	-0.141304	0.177029
8.75	-0.222705	-0.0538242	-0.0306682	-0.115854	-0.060188	0.0565997	-0.0191435	-0.208156	-0.1041	0.113105	0.0350254	0.200256	-0.0397745	-0.0363596	-0.102441	0.13512	0.0846706	-0.0262955	-0.0965918	-0.153887	-0.176348	-0.16073	-0.0554776	-0.145633	-0.371199	0.105726	-0.00811099	-0.0915904	0.0247651	0.0466588	-0.162928	-0.0415005	-0.00765532	-0.122007	0.102618	-0.0299404	-0.158872	0.0574378	0.064976	-0.107413	-0.230537	-0.162049	0.0717758
9	-0.192953	-0.0626421	-0.0881731	-0.0649459	-0.0630589	0.113155	0.0850356	-0.204353	-0.0954839	0.199108	0.0828282	0.132068	0.0352954	-0.108695	-0.0794474	0.0590697	0.137784	-0.043701	-0.1025	-0.0655116	-0.131861	-0.12193	0.0179611	-0.093017	-0.313904	0.079048	-0.0402125	0.00176751	0.0904967	0.0329288	-0.0945729	-0.0229553	-0.00509844	-0.0762066	0.0212944	-0.0223468	-0.139604	-0.00638723	0.070981	-0.137393	-0.190061	-0.130059	-0.0291186
9.25	-0.139015	-0.0890973	-0.121349	-0.00653662	-0.114263	0.163072	0.112213	-0.174244	-0.0841685	0.24757	0.100663	0.0909061	0.109269	-0.185183	-0.0895365	-0.000728205	0.113784	-0.070693	-0.0849452	0.000182855	-0.0742696	-0.0547577	0.128547	-0.0298711	-0.251509	0.064169	-0.069204	0.165303	0.107212	-0.0124203	-0.0463053	-0.0192344	-0.0179221	-0.0673475	-0.0526276	-0.0113428	-0.0886958	0.0598716	0.0861513	-0.143805	-0.180988	-0.0228093	-0.0288525
9.5	-0.0526737	-0.0823085	-0.0984572	-0.0115857	-0.172834	0.104873	0.0705863	-0.142315	-0.0885259	0.202507	0.0441846	0.0650585	0.125016	-0.176628	-0.131216	0.0176572	0.0295476	-0.146654	-0.0141166	0.0173575	-0.057625	-0.0199631	0.131651	-0.0414335	-0.231147	0.046835	-0.104027	0.298511	0.0957568	-0.0351169	-0.027156	-0.00714901	-0.0133012	-0.0800457	-0.0908399	-0.0128955	-0.0612295	0.144554	0.0804726	-0.143805	-0.20156	0.102129	0.0282752
9.75	0.066062	-0.053984	-0.00463927	-0.0418788	-0.169355	-0.0314285	0.0115188	-0.115862	-0.0891061	0.139732	-0.0316173	0.0617649	0.09029	-0.0922737	-0.129681	0.0822513	-0.0157607	-0.194994	0.0439015	0.0635648	-0.0538396	-0.0144963	0.0981475	-0.0887441	-0.261676	0.073406	-0.1122	0.267846	0.136402	-0.0196356	-0.0449641	0.0351406	0.0186242	-0.103265	-0.122566	-0.00979185	-0.0495795	0.173576	0.124004	-0.143805	-0.152193	0.150458	0.0625203
10	0.165349	-0.0211838	0.0999083	-0.0133791	-0.0893415	-0.119567	-0.0269506	-0.0684268	-0.0833569	0.134935	-0.0390768	0.086968	0.0318462	0.0038075	-0.0770328	0.148986	0.00504149	-0.156248	0.0238386	0.16853	-0.00382016	-0.0519844	0.1175	-0.0841188	-0.289036	0.0878687	-0.0626894	0.137981	0.254775	0.00433172	-0.0594864	0.0677891	0.0350801	-0.12237	-0.149672	0.0274072	-0.050661	0.159779	0.215206	-0.143805	-0.0436762	0.095554	0.0933963
10.25	0.172527	-0.00697603	0.150116	0.0419086	0.00802934	-0.110699	-0.0285394	-0.00156601	-0.0827284	0.179684	0.0345885	0.0947194	0.0235358	0.0176872	-0.00299964	0.137156	0.0242406	-0.094513	-0.0548594	0.212529	0.0428738	-0.0605401	0.152109	-0.0508666	-0.260869	0.0644109	-0.00616468	0.0877689	0.322154	0.0113197	-0.0675488	0.0717457	0.0309828	-0.14605	-0.160781	0.0694	-0.0691026	0.109812	0.300737	-0.107413	-0.0292697	0.0134786	0.0810314
10.5	0.0978381	0.0208716	0.0914651	0.0975834	0.0562237	-0.00714685	-0.0153418	0.0185079	-0.0793311	0.184119	0.0837319	0.0402072	0.0681019	0.00617019	0.0601321	0.0129163	0.0401497	-0.036687	-0.115639	0.13773	0.00838563	0.0241129	0.134687	-0.10188	-0.207881	0.0731761	0.052153	0.177656	0.268409	0.0220198	-0.0886705	0.0557569	0.0232442	-0.174015	-0.163157	0.115381	-0.095613	0.0321364	0.312087	-0.0406707	-0.120131	0.00274446	-0.0381014
10.75	0.0110212	0.0306932	0.0212595	0.116546	0.0649259	0.0935102	-0.0213452	-0.0345136	-0.0899177	0.138658	0.0179471	0.00534638	0.103838	0.0318808	0.0831207	-0.133228	0.0972669	0.0312948	-0.110331	0.0140456	-0.0473396	0.136109	0.141972	-0.184349	-0.191832	0.132349	0.103401	0.276255	0.185177	0.0261307	-0.116796	0.0469325	0.0294508	-0.173459	-0.163157	0.146954	-0.0992694	-0.0185473	0.183024	0.0021436	-0.128549	0.011211	-0.155985
11	-0.0553496	-0.0347417	-0.0167354	0.069746	0.0903205	0.140941	-0.0630203	-0.0965529	-0.108753	0.100105	-0.102122	0.0442293	0.0766378	0.0166185	0.0726341	-0.159234	0.163036	0.0844704	-0.0464827	-0.0811768	-0.0428098	0.188536	0.174568	-0.188507	-0.217269	0.154322	0.121771	0.246271	0.120542	0.0269864	-0.0754841	0.0433268	0.0298636	-0.153058	-0.149672	0.140182	-0.0735799	-0.0251666	-0.00505876	-0.0406707	0.0118522	0.0318176	-0.203851
11.25	-0.0926396	-0.116421	-0.0455964	0.00968794	0.113183	0.145534	-0.0969947	-0.116513	-0.129114	0.0715306	-0.154955	0.0951204	-0.00508394	-0.0575868	0.0923227	-0.0440111	0.158985	0.113259	0.00116845	-0.103219	0.00518046	0.177307	0.147327	-0.117264	-0.249784	0.121448	0.115268	0.0785559	0.0613089	0.00958005	-0.0419746	0.023468	0.0145522	-0.147648	-0.124942	0.097389	-0.0714707	0.011777	-0.122772	-0.107413	0.136847	0.0296816	-0.2131
11.5	-0.0876827	-0.151603	-0.0726875	-0.0206017	0.0774006	0.12316	-0.0956612	-0.121983	-0.134728	0.0594087	-0.0821752	0.0667871	-0.0749483	-0.0865725	0.171258	0.0903599	0.0859254	0.11408	-0.00390155	-0.0813764	0.0315036	0.143189	0.102677	-0.0419965	-0.268315	0.114854	0.102571	-0.0584888	0.00497586	-0.00810029	-0.101908	-0.0230148	-0.0224759	-0.18381	-0.0955922	0.0505392	-0.106181	0.0651139	-0.160625	-0.137393	0.122267	0.0157531	-0.186855
11.75	-0.0582239	-0.100401	-0.0729366	-0.0345151	0.0143007	0.0562473	-0.0927699	-0.159699	-0.135725	0.0232153	-0.0059658	0.00834591	-0.0838336	-0.0845341	0.274069	0.158709	0.0399547	0.0804999	-0.0329059	-0.0432575	0.00196201	0.0592458	0.0899723	-0.0241942	-0.288341	0.131329	0.0965946	-0.0682794	0.0140344	-0.0156127	-0.206397	-0.0590968	-0.0425515	-0.247136	-0.073241	0.0074825	-0.141713	0.0766206	-0.134113	-0.143805	0.00568679	0.0182942	-0.138723
12	-0.0752695	-0.00884134	-0.0543946	-0.0600379	-0.0272525	-0.00957776	-0.105819	-0.182462	-0.122601	0.00477725	0.0237131	0.0347774	-0.0440024	-0.12975	0.305265	0.131616	0.00995372	0.0565276	-0.0439308	0.00152089	-0.000737338	-0.00748499	0.161861	-0.00335364	-0.314402	0.142425	0.0403967	-0.00575645	0.0834692	-0.0165618	-0.274099	-0.09043	-0.0644828	-0.273809	-0.0573764	-0.059029	-0.144151	0.041706	0.0214527	-0.143805	-0.0903219	0.0295466	-0.107847
12.25	-0.122305	0.0548641	0.0146934	-0.0674016	-0.0417361	-0.0124548	-0.116726	-0.152299	-0.109516	0.0102065	0.0440515	0.154674	-0.00232616	-0.116123	0.190763	0.0818411	-0.030453	0.0641196	-0.0385571	0.0315914	0.0297293	0.0465536	0.236938	0.00756699	-0.332803	0.126525	-0.00365367	0.0240843	0.115482	-0.0265546	-0.267028	-0.123199	-0.100063	-0.236212	-0.0684853	-0.121653	-0.0773082	0.0304773	0.236373	-0.143805	-0.14277	0.00464263	-0.138723
12.5	-0.154467	0.0384426	0.101418	-0.0205982	-0.0736756	0.0306144	-0.0924934	-0.102929	-0.1064	0.00193667	0.0957859	0.255875	0.00908169	0.0249399	0.0328138	0.0212306	-0.0253041	0.0941151	-0.0148703	0.0128555	-0.000232069	0.146451	0.231583	-0.0490738	-0.344104	0.104279	0.00363728	0.0177333	0.0676209	-0.051799	-0.210599	-0.14348	-0.132987	-0.161706	-0.0979717	-0.116372	0.0150358	0.112074	0.344277	-0.143805	-0.111062	-0.0502577	-0.16061
12.75	-0.143262	-0.0158243	0.0709029	0.0352142	-0.102976	0.10719	-0.0253625	-0.105769	-0.112729	-0.0362755	0.12081	0.2651	0.00774931	0.174752	-0.0253443	-0.0350816	-0.00250362	0.0928137	0.00673184	-0.0557327	-0.11465	0.16659	0.153794	-0.16608	-0.343318	0.083852	0.0500236	0.0129183	0.0290888	-0.0386309	-0.14959	-0.130418	-0.13233	-0.130626	-0.109081	-0.0675197	0.0589601	0.24229	0.295059	-0.143805	0.0141008	-0.0366062	-0.0816086
13	-0.103207	-0.0801143	-0.0575468	0.0230872	-0.0556358	0.170205	0.041309	-0.14881	-0.13405	-0.0286441	0.0538209	0.166013	0.0364918	0.235257	0.0159444	-0.0762098	-0.0106495	0.0511898	0.0150108	-0.0838709	-0.195178	0.0881397	0.0966879	-0.224493	-0.314689	0.0527057	0.0886522	0.0297815	0.047781	-0.00423608	-0.175873	-0.0846552	-0.0821478	-0.149038	-0.106701	-0.005357	0.0264234	0.279338	0.247388	-0.143805	0.166483	0.029685	0.0671513
13.25	-0.0601137	-0.124253	-0.162084	-0.0436653	0.0307697	0.161015	0.0692731	-0.16497	-0.160887	0.0327962	-0.0881628	0.0825315	0.0897536	0.261026	0.024638	-0.0583973	-0.0340012	0.0148762	-0.00123248	-0.0462528	-0.178685	-0.0136778	0.0536456	-0.186626	-0.272383	0.0162378	0.100109	0.00736749	0.102768	0.00686133	-0.222034	-0.0468412	-0.0242286	-0.173006	-0.111457	0.0123087	0.00132345	0.18725	0.200044	-0.143805	0.168904	0.0343655	0.198649
13.5	-0.0358771	-0.114194	-0.160688	-0.143688	0.0779088	0.105477	0.0257172	-0.156805	-0.180485	0.0827986	-0.222825	0.0821322	0.109742	0.234747	-0.0257315	-0.0051995	-0.0390723	-0.00283574	-0.0205203	-0.033554	-0.140112	-0.075379	0.01403	-0.142321	-0.249538	-0.0392521	0.112419	-0.0246889	0.13217	0.0197753	-0.18446	-0.0543226	-0.00860582	-0.164197	-0.0979717	-0.0185511	0.000313808	0.0759912	0.0804726	-0.143805	0.0375759	-0.0460954	0.24215
13.75	-0.0405768	-0.0451271	-0.0953002	-0.171804	0.103916	0.0992287	-0.0369955	-0.151387	-0.176459	0.100868	-0.234286	0.0925832	0.0572116	0.152536	-0.0976067	0.0203115	-0.0347831	-0.0154318	-0.0445083	-0.0797851	-0.141554	-0.0660415	-0.0170605	-0.15402	-0.264266	-0.0885044	0.0935628	-0.0501337	0.066738	0.0836927	-0.106463	-0.0769887	-0.0184796	-0.144556	-0.0684853	-0.0329061	-0.0148687	0.03555	0.0271233	-0.0710199	-0.101644	-0.0865491	0.229519
14	-0.0710366	0.00479562	-0.0543875	-0.115709	0.0960879	0.17594	-0.0853293	-0.144247	-0.138125	0.10573	-0.145968	0.0973679	-0.0310567	0.0485298	-0.161617	-0.0374869	-0.0431046	-0.0201108	-0.0582485	-0.156806	-0.172495	-0.0465811	-0.0612058	-0.200351	-0.303628	-0.0959076	0.033328	-0.0430387	-0.0413432	0.182685	-0.0511964	-0.0562449	0.00287966	-0.158553	-0.0708615	-0.0209544	-0.0702542	0.0578717	0.0653104	0.0624638	-0.180997	-0.081595	0.177022
14.25	-0.0955434	-0.000983392	-0.0766244	-0.0764036	0.042452	0.244953	-0.102226	-0.113932	-0.0729534	0.114199	-0.053412	0.0873669	-0.0869522	0.0109674	-0.212106	-0.0973315	-0.0533135	0.0387434	-0.0444959	-0.21022	-0.193234	-0.0488049	-0.139655	-0.236062	-0.337827	-0.0455528	-0.0504767	-0.0145302	-0.039206	0.25086	-0.0376768	0.00173301	0.0390874	-0.195102	-0.0979717	-0.0128324	-0.129104	0.0959888	0.0539692	0.148092	-0.142947	-0.0984444	0.0980208
14.5	-0.0758175	-0.0144891	-0.0968867	-0.0976877	0.00659013	0.261519	-0.0852481	-0.0974021	-0.0158322	0.141926	-0.0304545	0.066466	-0.0930556	0.0593952	-0.228305	-0.115843	-0.0777489	0.0961192	-0.00833416	-0.213604	-0.190612	-0.0248765	-0.20864	-0.230176	-0.341745	0.0168506	-0.0864667	-0.0424088	0.0563987	0.203153	-0.0746406	0.0359548	0.0377184	-0.23865	-0.109081	-0.0203688	-0.148629	0.118249	-0.0429114	0.0988564	-0.0498416	-0.10261	0.00202361
14.75	-0.0206273	0.00933731	-0.0755693	-0.0765517	0.0382155	0.212918	-0.0381092	-0.116826	0.000551896	0.198512	-0.0373796	0.0176822	-0.074431	0.154007	-0.183467	-0.118132	-0.102837	0.0479957	0.034599	-0.136212	-0.148494	0.0904677	-0.21571	-0.175376	-0.319674	0.0824674	-0.0353714	-0.0826141	0.105484	0.0890429	-0.140451	0.0316699	0.00484	-0.260524	-0.093216	-0.0224451	-0.138384	0.100983	-0.0962607	0.0321146	0.00569556	-0.116127	-0.0553636
15	-0.00660628	0.0574376	-0.00708913	0.0212938	0.0683006	0.117353	0.0204011	-0.124935	-0.01991	0.235586	-0.0337411	-0.00851965	-0.0774588	0.170513	-0.11857	-0.161056	-0.0961613	-0.0568713	0.0603052	-0.0459302	-0.114073	0.204122	-0.165111	-0.123844	-0.297951	0.135477	0.0523788	-0.0468386	0.0941524	0.0334869	-0.177185	0.035244	-0.00709947	-0.252716	-0.086726	-0.0196026	-0.116423	0.0623465	-0.0694229	0.0149687	-0.0498416	-0.157369	-0.0334769

## Sheet: Figure 2Bii
Go poke onset (sec)	Up																					Down
-7	0.111087	-0.308806	-0.297198	-0.404457	-0.0775515	-0.0577178	-0.2711	-0.321693	0.0764087	0.190538	-0.0235737	-0.3655	0.031915	-0.307659	-0.189437	-0.0759217	0.358917	0.269212	-0.236819	-0.228327	0.144959	-0.0971858	0.134412	0.405082	0.572847	-0.0710487	-0.170344	-0.140087	-0.22326	-0.23955	-0.16962	-0.166052	0.191784	0.166689	-0.0185517	-0.327791	0.130314	-0.211518	-0.260179	-0.231457	-0.140002	-0.208556	-0.1438	0.0314734	-0.166295	-0.143805	0.239277	-0.0799046	0.0728246
-6.75	0.217377	-0.353501	-0.297198	-0.593474	-0.0577064	-0.0783935	-0.235318	-0.321693	0.00644123	0.18505	0.140685	-0.393409	0.021306	-0.432111	-0.0237092	0.138043	0.305555	0.475893	-0.244906	-0.34642	0.309326	-0.18053	0.326018	0.409962	0.569843	-0.0776905	-0.219351	-0.272327	-0.217869	-0.23955	-0.115093	-0.195951	0.298917	0.111449	-0.102323	-0.507164	0.426399	-0.148437	-0.212665	-0.192639	-0.13146	-0.213429	-0.312395	-0.0303373	-0.166295	-0.143805	0.182216	-0.157913	-0.0248883
-6.5	0.204847	-0.343683	-0.297198	-0.429361	-0.0779516	-0.0322263	-0.169696	-0.321693	0.0718676	0.226292	0.00153778	-0.26849	-0.0553361	-0.523455	0.102041	0.22586	0.0168024	0.418333	-0.244906	-0.33356	0.100663	-0.241534	0.410655	0.340402	0.472174	-0.0310008	-0.229833	-0.295627	-0.139507	-0.0786529	-0.01571	0.00176769	0.191784	0.0393695	-0.172317	-0.56295	0.690712	-0.059168	-0.166684	-0.173156	-0.0865595	-0.213429	-0.265463	0.00687251	-0.166295	-0.0437254	0.226515	-0.174599	-0.114337
-6.25	0.076144	-0.3408	-0.297198	-0.259032	-0.116869	0.0448653	-0.1276	-0.321693	0.0707342	0.174041	-0.402212	-0.170405	-0.106843	-0.533954	0.0915901	0.32739	-0.171137	0.184246	-0.244906	-0.303208	-0.189571	-0.235951	0.268561	0.187863	0.286907	0.0893641	-0.229833	-0.236006	-0.124585	0.216422	0.0900115	0.361443	0.0632942	0.0444639	-0.12334	-0.410064	0.669736	0.00391349	-0.119178	-0.13276	-0.0042793	-0.213429	-0.0552681	0.173034	-0.166295	0.139815	0.325881	-0.174599	-0.120763
-6	-0.0909511	-0.32865	-0.297198	-0.266328	-0.0535511	0.152679	-0.169696	-0.321693	0.0631721	0.0816016	-0.718185	-0.101628	-0.0553413	-0.537705	-0.0580019	0.427433	-0.0956104	-0.139074	-0.244906	-0.326644	-0.158747	-0.193464	0.00462119	0.0803649	0.147281	0.212114	-0.229833	-0.170717	-0.221779	0.405711	0.121746	0.579181	0.0302854	0.237141	0.0372895	-0.159871	0.447365	0.0261728	-0.0581907	-0.0648527	0.0803218	-0.213429	0.117574	0.33928	-0.166295	0.257554	0.352589	-0.174599	-0.0502902
-5.75	-0.13064	-0.420781	-0.297198	-0.253959	0.0101014	0.200661	-0.235318	-0.321693	0.156768	0.0655245	-0.748286	-0.0734104	0.0875012	-0.628667	-0.155161	0.432309	0.0332862	-0.437935	-0.199009	-0.322753	0.118983	-0.140481	-0.124081	0.130366	0.140225	0.245334	-0.110856	-0.118863	-0.362804	0.296871	0.0228623	0.447218	-0.0768301	0.360414	0.25799	0.0767035	0.185385	0.030095	-0.0580791	-0.0483574	0.141757	-0.213429	0.11697	0.348844	-0.166295	0.139815	0.313356	-0.174599	0.104642
-5.5	-0.082317	-0.502436	-0.297198	-0.0758813	-0.058966	0.138613	-0.264795	-0.321693	0.163996	0.0927982	-0.570209	-0.106114	0.150241	-0.761888	-0.13098	0.34821	-0.0126291	-0.507654	-0.114835	-0.209258	0.200548	-0.0610317	-0.0384785	0.265568	0.250258	0.192754	0.107341	-0.111096	-0.406751	0.149333	-0.143231	0.19666	-0.135258	0.314762	0.300868	0.249381	-0.0579421	0.030095	-0.115407	-0.0712902	0.158581	-0.213429	0.0359879	0.204165	-0.166295	0.0563544	0.312243	-0.174599	0.239544
-5.25	-0.0265069	-0.519045	-0.297198	0.0318531	-0.176299	-0.0661709	-0.2711	-0.321693	-0.080194	-0.0606364	-0.316695	-0.223403	0.0872898	-0.764086	-0.132611	0.333791	-0.177427	-0.438641	-0.0608388	-0.00203242	-0.0252038	-0.0242074	0.0536032	0.234734	0.255994	0.140062	0.3068	-0.170717	-0.345751	0.111431	-0.205566	0.0153754	-0.0644849	0.143996	0.171299	0.27403	-0.220034	0.00783568	-0.0674919	0.00709887	0.16894	-0.213429	0.0101296	0.108724	-0.0777948	0.157449	0.401312	-0.0799046	0.266402
-5	0.0368718	-0.517294	-0.297198	-0.0590935	-0.118303	-0.230708	-0.2711	-0.321693	-0.430043	-0.302614	-0.163285	-0.332366	0.0419288	-0.657292	-0.120868	0.341607	-0.22241	-0.389342	-0.114835	0.173732	-0.288923	-0.10582	0.0301709	-0.010432	0.0968474	0.101481	0.275927	-0.147853	-0.250257	0.0688848	-0.177116	-0.158993	0.00559489	0.0301366	-0.0254064	0.176887	-0.227155	-0.0552458	0.12371	0.170807	0.169047	-0.213429	0.0733502	0.251903	0.0845099	0.257554	0.454405	0.0937587	0.16868
-4.75	0.0820489	-0.503529	-0.297198	-0.181051	0.00807805	-0.234762	-0.2711	-0.321693	-0.534415	-0.28479	-0.125328	-0.372667	0.0848209	-0.536779	-0.0459113	0.350654	-0.163028	-0.288802	-0.199009	0.201296	-0.280023	-0.164685	0.0500767	-0.171527	0.00884484	0.0241906	0.127717	-0.0821167	-0.144202	0.149333	-0.161019	-0.237312	-0.0768301	-0.0643782	-0.240977	0.014353	-0.0650639	-0.144514	0.276364	0.268353	0.124317	-0.213429	0.279839	0.399117	0.188627	0.139815	0.428008	0.205162	0.181913
-4.5	0.12578	-0.452913	-0.297198	-0.296534	0.0893777	-0.140255	-0.2711	-0.321693	-0.362831	-0.108595	-0.182544	-0.299967	0.0249832	-0.431222	0.0734499	0.453556	-0.0965302	-0.0511495	-0.236819	0.119482	-0.102894	0.0239143	0.0461784	-0.103347	0.0685364	-0.0489068	-0.0402818	-0.0670086	0.0679752	0.325242	-0.141382	-0.206742	-0.20532	-0.16807	-0.360046	-0.0377801	0.11648	-0.185337	0.235453	0.236512	0.0551318	-0.213429	0.539322	0.319232	0.0845099	-0.0437254	0.380094	0.0937587	0.30542
-4.25	0.191651	-0.372307	-0.297198	-0.339669	0.117129	-0.00479043	-0.235318	-0.289741	-0.065093	0.054007	-0.150287	-0.114013	-0.180589	-0.36752	0.148415	0.478992	-0.0344748	0.217997	-0.244906	0.0409243	-0.0114496	0.37179	-0.00150681	0.169107	0.224167	-0.0983689	-0.170344	-0.16295	0.306964	0.311067	-0.0904324	-0.16294	-0.263037	-0.222824	-0.393855	0.12273	0.204448	-0.166774	0.0923951	0.164797	-0.00649145	-0.213429	0.674048	0.0930329	0.0107059	-0.126171	0.384454	-0.0799046	0.284996
-4	0.279417	-0.332084	-0.297198	-0.290179	0.181032	0.065473	-0.169696	-0.231141	0.0593566	0.111966	-0.110114	0.0332978	-0.305071	-0.360331	0.119825	0.325704	0.0414928	0.269136	-0.199009	0.0613464	-0.133725	0.566935	-0.0460131	0.377236	0.312448	-0.0901528	-0.219351	-0.25155	0.395981	0.0688848	0.00272005	-0.155029	-0.275382	-0.148423	-0.299618	0.370969	0.204437	-0.144509	-0.000573051	0.114337	-0.00178688	-0.130464	0.535355	0.000215411	0.100104	-0.143805	0.367121	-0.157913	0.0660072
-3.75	0.303526	-0.367111	-0.297198	-0.102054	0.283943	-0.0128915	-0.1276	-0.19355	-0.0807697	-0.0764751	-0.268039	0.101346	-0.243117	-0.37987	0.0391571	0.0104765	0.0788659	0.0347363	-0.114835	0.0645974	-0.194143	0.451381	-0.0895494	0.311025	0.229785	-0.0140257	-0.170344	-0.272316	0.283982	-0.0644775	0.127057	-0.169783	-0.275382	0.00509767	-0.173754	0.444724	0.204437	-0.170696	-0.0580846	0.0371023	0.0459622	0.0216889	0.37025	0.057271	0.188627	-0.143805	0.296765	-0.174599	-0.152982
-3.5	0.24982	-0.416475	-0.297198	0.161922	0.367715	-0.171524	-0.169696	-0.231141	-0.247216	-0.350999	-0.501517	0.134777	-0.0443097	-0.366452	0.0287066	-0.200027	0.0654067	-0.309484	-0.0608388	0.0213972	-0.0802599	0.22076	-0.143817	0.120785	0.109634	0.148246	-0.00175754	-0.339703	0.116371	0.0830602	0.172592	-0.0956493	-0.275382	0.054063	-0.0910576	0.262891	0.218691	-0.211518	-0.118651	-0.0511948	0.0751884	0.119294	0.363479	0.122517	0.0845099	-0.143805	0.214093	-0.174599	-0.230252
-3.25	0.248933	-0.357454	-0.297198	0.338032	0.409063	-0.216073	-0.235318	-0.289741	-0.182783	-0.482097	-0.665206	0.125498	0.05218	-0.374514	0.0512478	-0.213149	0.012045	-0.525746	-0.114835	-0.0640705	0.0789958	0.0693114	-0.136916	-0.00712966	0.0532987	0.309116	0.177326	-0.37646	0.00351774	0.311067	0.0932962	0.155755	-0.275382	0.0179303	-0.0580112	-0.0519933	0.16402	-0.207596	-0.15374	-0.10526	0.0802028	0.0216889	0.444495	0.14371	-0.0777948	-0.143805	0.179063	-0.174599	-0.152972
-3	0.288824	-0.230532	-0.297198	0.294565	0.387717	-0.0924663	-0.264795	-0.316063	0.0197794	-0.391487	-0.645703	-0.0177423	0.0245658	-0.425288	0.0734499	-0.125033	-0.0612375	-0.476469	-0.199009	-0.0645456	0.174289	0.0530334	-0.0173356	-0.0013797	0.0588065	0.323986	0.177326	-0.155631	-0.0339414	0.391515	-0.0361934	0.328226	-0.275382	-0.0465231	-0.0385386	-0.235515	0.0494778	-0.148437	-0.0952191	-0.0591259	0.0345027	-0.130464	0.498365	0.0482224	-0.0622006	-0.143805	0.214951	-0.174599	0.0137469
-2.75	0.360255	-0.165536	-0.181687	0.0511015	0.341035	0.0266219	-0.2711	-0.321693	0.0933686	-0.230519	-0.492441	-0.21029	0.0147319	-0.461338	0.0572974	-0.0834251	-0.0205748	-0.258805	-0.236819	0.0370335	0.218334	0.210861	0.0965224	0.0656985	0.0802232	0.227201	-0.00175754	0.255867	-0.101614	0.457768	-0.199941	0.170514	-0.20532	-0.13074	-0.0142276	-0.173202	-0.0579421	-0.0814273	0.0119752	0.0418637	0.000234336	-0.19881	0.495739	-0.0965905	0.0845099	-0.0437254	0.311486	-0.174599	0.368683
-2.5	0.322713	-0.319002	0.0301523	-0.324022	0.330087	0.061766	-0.2711	-0.321693	0.0562188	-0.0205287	-0.243384	-0.412964	0.121831	-0.442367	-0.0519523	-0.107432	0.143606	-0.0758426	-0.244906	0.151186	0.157463	0.454131	0.202807	0.173276	0.148233	0.149537	-0.0408851	0.492263	-0.120907	0.633677	-0.319355	-0.151315	-0.00676795	-0.141796	0.0580418	0.0425074	-0.112614	-0.059168	0.0444799	0.0746742	0.0493428	-0.213429	0.510469	-0.191403	0.277128	0.139815	0.390092	-0.174599	0.729763
-2.25	0.181	-0.504889	0.166045	-0.553272	0.224878	0.065317	-0.2711	-0.321693	0.116295	0.190794	-0.0211292	-0.57652	0.282837	-0.331753	-0.120877	-0.13239	0.256959	-0.0885507	-0.244906	0.0993032	0.0145197	0.607472	0.327298	0.354038	0.292409	0.160686	0.2368	0.255867	0.0362296	0.647873	-0.22973	-0.270551	0.274209	-0.0294766	0.121407	0.308739	-0.024646	-0.0853551	0.0424228	0.0592377	0.104788	-0.185774	0.483179	-0.213168	0.335315	0.257554	0.344925	-0.174599	0.865729
-2	0.0129446	-0.591462	0.0301523	-0.518869	-0.0318125	0.103242	-0.2711	-0.321693	0.305333	0.430752	0.127779	-0.540716	0.285518	-0.206745	-0.0801955	-0.143392	0.146459	-0.286158	-0.199009	0.00185839	-0.163055	0.529028	0.446198	0.655742	0.542132	0.163861	0.643974	-0.0234012	0.281423	0.296871	-0.0020888	-0.120739	0.402698	0.0116846	0.0649485	0.406421	0.16402	-0.096068	0.0781413	0.0778395	0.0465344	-0.135057	0.441899	-0.193905	0.365628	0.139815	0.214936	-0.0799046	0.620264
-1.75	-0.0358296	-0.593188	-0.181687	-0.386396	-0.204946	0.117878	-0.2711	-0.321693	0.474281	0.545868	0.245272	-0.312348	0.146347	-0.171429	-0.0801868	-0.133132	-0.125982	-0.444242	-0.114835	-0.0792433	-0.293494	0.296206	0.405243	0.903706	0.763856	0.0697426	0.872049	-0.0147408	0.512979	0.0964198	0.220608	0.0581213	0.344271	-0.0754461	-0.0250692	0.331407	0.318989	-0.0591736	0.0614236	0.0661967	-0.0686583	-0.102522	0.45206	-0.163593	0.350909	-0.0437254	0.135931	0.0937587	0.272808
-1.5	0.0311632	-0.628273	-0.276844	-0.392751	-0.128544	0.0785332	-0.2711	-0.321693	0.539489	0.459048	0.418581	-0.0735533	-0.0404368	-0.264107	-0.22977	-0.0543919	-0.227503	-0.484437	-0.0608388	-0.162393	-0.288916	0.104813	0.320366	1.03398	0.910617	-0.0736656	0.802064	0.0734453	0.697271	0.405671	0.25234	0.102985	0.204129	-0.32169	-0.0494459	0.253174	0.487783	0.0261728	-0.0491239	-0.0457091	-0.0921097	-0.135057	0.440163	-0.139575	0.277128	-0.126171	0.155175	0.205162	0.0477854
-1.25	0.152648	-0.66993	-0.297198	-0.439361	0.0493259	0.0621769	-0.2711	-0.321693	0.488249	0.232645	0.624177	0.00734222	-0.22863	-0.334263	-0.383763	0.0409397	-0.0962149	-0.453145	-0.114835	-0.1817	-0.17679	0.070361	0.235074	1.00578	0.896785	-0.143085	0.674817	-0.0898832	1.06759	0.861684	0.163568	0.0657935	0.0880023	-0.544651	-0.00958889	0.343595	0.74344	0.074845	-0.1518	-0.123431	-0.0406702	-0.158119	0.297299	-0.156975	0.188605	-0.0437254	0.217527	0.188453	0.0724231
-1	0.303066	-0.654971	-0.297198	-0.299996	0.129668	0.0742599	-0.2711	-0.321693	0.252135	-0.00443716	0.777693	0.0786425	-0.319553	-0.210973	-0.412006	0.153638	0.12239	-0.375394	-0.153111	-0.162155	0.113871	0.181953	0.0223921	0.84771	0.790029	-0.15052	0.762921	-0.244231	1.53774	1.02258	0.0571629	0.0248821	-0.0644849	-0.657162	0.0865151	0.441739	0.934049	0.0261728	-0.127838	-0.0676035	-0.0123865	-0.130184	0.0712778	-0.272979	0.261511	0.139815	0.263014	0.188453	0.253159
-0.75	0.457332	-0.553351	-0.297198	-0.0514746	0.296051	0.0546647	-0.2711	-0.321693	0.0524195	-0.151643	0.804672	0.31773	-0.148945	0.0448796	-0.292645	0.192652	0.148699	-0.320776	-0.106748	-0.17756	0.416854	0.444071	-0.253853	0.625721	0.640255	-0.134937	1.05112	-0.147417	1.80093	0.833292	0.0704156	0.0101335	-0.0651953	-0.73116	0.179501	0.395677	0.724408	-0.0591736	-0.00680234	0.0625055	-0.0879576	-0.102522	-0.0461093	-0.433789	0.455027	0.257554	0.214488	0.221848	0.330449
-0.5	0.649891	-0.29353	-0.0661762	-0.00543779	0.802674	0.06203	-0.235318	-0.321693	0.132774	-0.0380515	0.751552	0.709044	0.243622	0.355909	-0.0922775	0.29603	0.0650793	-0.279539	-0.0608388	-0.100372	0.530939	0.651207	-0.402111	0.513355	0.555862	-0.125658	1.20157	0.0138249	1.59257	0.675408	0.104043	0.106699	0.134067	-0.842942	0.0620472	0.186144	0.237723	-0.114405	0.0685561	0.133155	-0.261119	-0.135057	-0.0285889	-0.648944	0.439432	0.139815	0.0474764	0.0937587	0.175497
-0.25	0.912094	0.570708	0.588524	0.222095	1.361	0.199428	-0.169696	-0.225835	0.545572	0.388098	0.88511	0.978011	0.67131	0.614042	0.148068	0.590929	0.0929215	-0.11081	-0.114835	0.220586	0.352108	0.560589	-0.376918	0.565226	0.431875	-0.177191	0.900665	-0.0380291	1.10185	0.47276	0.179036	0.301603	0.286572	-0.909116	-0.365376	-0.0524913	-0.1107	-0.166774	0.00420996	0.101656	-0.482523	-0.185774	0.0611265	-0.82062	0.173011	-0.0437254	-0.14024	-0.0799046	-0.0502999
0	0.97831	2.01095	1.63052	1.07137	1.47355	0.609635	-0.056036	0.077774	1.2141	0.916561	1.66846	0.975744	0.831526	0.730591	0.46778	0.916574	0.289076	0.0905654	-0.199009	0.725979	0.343391	0.137896	-0.290153	0.732728	0.201683	-0.333791	0.50623	-0.25155	0.588588	0.243978	0.185181	0.343821	0.121722	-0.737543	-0.650336	-0.234935	-0.25333	-0.211518	-0.12448	0.0549978	-0.664585	-0.208556	0.243064	-0.838074	-0.0622006	-0.126171	-0.181163	-0.157913	-0.177992
0.25	0.524281	3.09742	2.26604	1.98102	0.944556	1.1399	0.104676	0.48885	1.72908	1.25123	2.73167	0.833786	0.664947	0.672077	0.852015	0.97854	0.768538	0.13355	-0.0991261	1.06423	0.661616	-0.286333	-0.31083	0.86498	-0.140414	-0.544025	0.149269	-0.405004	0.259945	0.0167869	0.03772	0.0317255	-0.135258	-0.401369	-0.466568	-0.255163	-0.234277	-0.163077	-0.190127	0.0645161	-0.756515	-0.185774	0.343592	-0.725519	-0.0622006	-0.143805	-0.0883386	-0.174599	-0.275695
0.5	-0.177067	2.89562	1.97825	1.89193	0.260964	1.54414	0.290271	0.675592	1.70765	1.22644	2.9938	0.699331	0.40072	0.557704	1.05842	0.869288	1.36304	0.0586573	0.283	1.10897	0.873119	-0.567255	-0.427575	0.736425	-0.425259	-0.711472	-0.110856	-0.368694	0.136636	0.00179574	-0.212114	-0.274731	-0.250691	-0.0819683	-0.0049809	-0.292345	-0.105482	0.17806	-0.206845	0.034454	-0.755068	-0.0797464	0.126269	-0.615266	0.0845099	-0.143805	0.00174613	-0.0799046	-0.353358
0.75	-0.744835	1.94518	0.956581	1.06188	-0.269709	1.62647	0.433762	0.642975	1.13885	0.869952	2.11298	0.512463	0.227442	0.415733	0.90884	0.755642	1.75065	0.0512984	0.835203	0.839694	0.686111	-0.777346	-0.601099	0.126564	-0.788534	-0.789031	-0.208869	-0.12664	0.12683	0.230598	-0.43349	-0.288803	-0.275382	-0.0481168	0.411	-0.378341	0.00193813	0.931955	-0.232855	-0.0951017	-0.672307	0.109534	-0.312035	-0.591466	0.277128	-0.143805	0.0239475	0.0937587	-0.385185
1	-1.02388	1.21193	0.0900414	0.443403	-0.640875	1.47308	0.665675	0.74478	0.651239	0.46649	1.2183	0.201019	0.0713255	0.212358	0.572611	0.612779	1.59809	0.123395	1.27131	0.572506	0.317936	-0.951261	-0.753276	-0.637502	-1.16757	-0.775093	-0.229833	0.138735	0.145095	0.405711	-0.529768	-0.151071	-0.275382	-0.215705	0.54632	-0.334866	0.00193813	1.82772	-0.275068	-0.22838	-0.515357	0.38178	-0.652763	-0.650677	0.335315	-0.143805	0.0500265	0.205162	-0.314722
1.25	-1.08194	0.827285	-0.236137	0.309205	-0.860546	1.28579	1.20387	1.10852	0.506472	0.220797	1.17481	-0.047775	-0.146053	-0.0136615	0.200814	0.351705	1.31022	0.153807	1.53908	0.558929	0.171901	-1.08164	-0.848439	-1.23892	-1.47628	-0.737546	-0.229833	0.182811	0.0518175	0.216422	-0.510223	-0.0954105	-0.275382	-0.399592	0.449124	-0.151493	-0.0650639	2.38845	-0.27324	-0.25387	-0.33789	0.833546	-0.799934	-0.746883	0.277128	-0.143805	0.127454	0.188453	-0.173013
1.5	-1.08295	0.741743	-0.297198	0.400415	-0.95991	1.08913	1.9028	1.45947	0.551689	0.0600525	1.57969	-0.158233	-0.266848	-0.168114	-0.102745	0.109416	1.2858	0.128582	1.8392	0.632249	0.257072	-1.14689	-0.961299	-1.60276	-1.69566	-0.721581	-0.229833	0.130499	-0.10441	-0.0786529	-0.500179	-0.140508	-0.275382	-0.477361	0.296977	0.0480997	-0.0721958	2.50366	-0.223677	-0.191056	-0.209521	1.29105	-0.826063	-0.817963	0.100104	-0.143805	0.221678	0.188453	-0.0821081
1.75	-1.03627	0.822291	-0.181687	0.412623	-0.931435	0.903349	2.34421	1.70416	0.614459	-0.00913265	1.76883	-0.299659	-0.308315	-0.262111	-0.308806	-0.014636	1.36441	0.0998738	2.18352	0.673859	0.50468	-1.15861	-1.0587	-1.72864	-1.73482	-0.722918	-0.229833	0.27872	-0.0893235	-0.211199	-0.511325	-0.188262	-0.275382	-0.441038	0.316845	0.128594	0.0494778	2.24913	-0.175751	-0.145986	-0.155387	1.32003	-0.75065	-0.833798	-0.0777948	-0.143805	0.29271	0.221848	-0.173013
2	-0.956743	0.985224	0.145663	0.338717	-0.87921	0.698574	2.43432	1.91342	0.647054	-0.00769345	1.67923	-0.40878	-0.347731	-0.346732	-0.418047	-0.124883	1.31658	0.0659957	2.42158	0.909514	0.68179	-1.14666	-1.08598	-1.73397	-1.63185	-0.71937	-0.229833	0.500018	-0.0684358	-0.23955	-0.501522	-0.218605	-0.20532	-0.403433	0.407105	0.0853768	0.211569	1.75602	-0.194417	-0.194226	-0.131135	0.778509	-0.663156	-0.767131	-0.150701	-0.143805	0.30503	0.0937587	-0.237452
2.25	-0.918027	1.18172	0.493395	0.223417	-0.882426	0.466432	2.33326	2.00961	0.620486	-0.00885718	1.45974	-0.375352	-0.382066	-0.412197	-0.418047	-0.263002	0.993026	0.05974	2.28388	1.1871	0.746982	-1.12997	-1.01196	-1.68676	-1.57071	-0.718589	-0.229833	0.432631	-0.186123	-0.23955	-0.552471	-0.200126	-0.00676795	-0.413381	0.380019	0.0100844	0.311857	1.19339	-0.242037	-0.269204	-0.0714592	0.244232	-0.60366	-0.610466	-0.166295	-0.143805	0.25348	-0.0799046	-0.120763
2.5	-0.934535	1.41949	0.608906	0.209348	-0.890295	0.197196	2.18517	1.88147	0.442095	-0.253376	1.13646	-0.223549	-0.416607	-0.419315	-0.361214	-0.351418	0.529813	0.0977451	1.7555	1.13677	0.626477	-1.09503	-0.928692	-1.73169	-1.72401	-0.732686	-0.170344	0.146043	-0.316964	-0.23955	-0.625959	-0.151076	0.204147	-0.363072	0.262077	-0.046774	0.366529	0.860494	-0.282198	-0.300428	-0.00277286	0.102673	-0.544204	-0.374344	-0.166295	-0.143805	0.175977	-0.157913	0.0660169
2.75	-0.916424	1.55489	0.588524	0.338008	-0.795472	-0.0250625	2.03536	1.67371	0.208276	-0.580191	0.666321	-0.0860956	-0.365115	-0.366817	-0.32088	-0.372356	0.142282	0.328246	1.09749	0.596654	0.34851	-1.0244	-0.910958	-1.82352	-1.85975	-0.735809	-0.0612461	-0.103341	-0.335909	-0.23955	-0.557714	-0.177461	0.204147	-0.216633	0.178577	-0.0582921	0.333233	0.600162	-0.308208	-0.303595	0.030087	0.165125	-0.399564	-0.127839	-0.166295	-0.143805	0.146289	-0.174599	0.130054
3	-0.858061	1.49026	0.74477	0.64112	-0.543001	-0.0826723	2.05222	1.73761	0.120808	-0.633379	0.357853	0.0150792	-0.146048	-0.298339	-0.326929	-0.398207	-0.0766215	0.504464	0.5993	0.064982	0.0193484	-0.934892	-0.887394	-1.81109	-1.82619	-0.711325	0.00873952	-0.184163	-0.254178	-0.23955	-0.36099	-0.308561	-0.00676795	-0.0917333	0.144585	0.0213614	0.366109	0.293742	-0.317278	-0.315762	-0.0444697	0.220442	-0.251579	0.020449	-0.166295	-0.143805	0.199709	-0.174599	0.0978347
3.25	-0.769711	1.41732	0.841099	0.949629	-0.170758	-0.0318044	2.21501	2.0682	0.311094	-0.348577	0.459691	0.190291	0.157379	-0.235728	-0.326929	-0.469018	-0.10907	0.401095	0.323448	-0.105704	-0.175824	-0.872522	-0.767923	-1.67875	-1.68647	-0.682305	-0.0612461	-0.16295	-0.172445	-0.23955	-0.162354	-0.390844	-0.192974	-0.0508228	0.0330064	0.254506	0.555184	0.134815	-0.319218	-0.332257	-0.109095	0.3034	-0.178813	0.0917186	-0.0777948	-0.143805	0.292397	-0.174599	0.0341797
3.5	-0.561425	1.50497	0.608906	0.968798	0.199278	-0.0340417	2.38131	2.49521	0.555742	0.0288694	0.655623	0.384303	0.229357	-0.128449	-0.280555	-0.513224	-0.0800626	0.0893361	0.131305	-0.00918016	-0.219605	-0.832402	-0.565403	-1.57294	-1.59875	-0.686591	-0.170344	-0.118863	-0.128189	-0.23955	-0.128043	-0.330998	-0.263037	-0.0724929	-0.126371	0.429631	0.664548	0.164102	-0.308208	-0.321678	-0.0878965	0.427898	-0.174743	0.167239	0.0845099	-0.143805	0.354015	-0.174599	-0.0434826
3.75	-0.30756	1.71921	0.166017	0.83119	0.33641	-0.0878446	2.4098	2.68517	0.622526	0.194758	0.709401	0.424597	0.0735936	0.0131489	-0.22977	-0.53342	-0.052855	-0.167446	-0.0608503	0.142034	-0.189288	-0.734212	-0.374231	-1.56146	-1.59898	-0.702626	-0.219351	-0.0670197	-0.0828953	-0.159102	-0.224697	-0.169777	-0.275382	-0.100787	-0.165748	0.354665	0.473939	0.194223	-0.288018	-0.290272	-0.0579089	0.567503	-0.123489	0.239574	0.188627	-0.143805	0.366622	-0.174599	-0.0889352
4	-0.152147	1.79063	-0.161333	0.602867	0.177531	-0.176067	2.38302	2.66657	0.484822	0.150531	0.519164	0.334912	-0.173044	0.0936341	-0.120868	-0.606976	-0.0667672	-0.272011	-0.190921	0.25229	-0.172212	-0.548903	-0.238312	-1.5322	-1.59076	-0.686537	-0.229833	-0.00173019	0.0605721	-0.0115639	-0.395496	-0.0806619	-0.275382	-0.0786749	-0.11812	0.155442	0.278141	0.0408079	-0.275065	-0.269109	-0.0295453	0.524453	-0.0321227	0.245513	0.0845099	-0.143805	0.323238	-0.0799046	-0.0821178
4.25	-0.17736	1.64942	-0.276844	0.217766	0.0132166	-0.248878	2.04069	2.26088	0.280611	-0.074689	0.224146	0.311133	-0.287899	0.0475253	-0.0233615	-0.682541	-0.00727124	-0.304988	-0.236819	0.143393	-0.155386	-0.36791	-0.216434	-1.4264	-1.48953	-0.609684	-0.229833	0.153821	0.228721	0.0830804	-0.505417	-0.110159	-0.275382	-0.0474176	-0.219455	0.0095207	0.287606	-0.140818	-0.288018	-0.290272	0.0528599	0.401005	-0.0293059	0.15551	-0.0777948	-0.143805	0.262642	0.0937587	-0.0434826
4.5	-0.21803	1.5053	-0.297198	-0.242376	-0.00329089	-0.220761	1.5873	1.74293	0.248485	-0.131886	-0.0395469	0.277591	-0.211257	-0.0455579	-0.0176596	-0.658693	0.146451	-0.19661	-0.244906	-0.166527	-0.0545345	-0.195436	-0.252562	-1.21935	-1.27322	-0.486157	-0.170344	0.219557	0.287356	0.0688848	-0.562311	-0.169789	-0.275382	-0.0426351	-0.363871	-0.0478774	0.278561	-0.218089	-0.286189	-0.287285	0.0913796	0.202799	-0.125923	0.0826843	-0.150701	-0.143805	0.228769	0.394551	0.0137469
4.75	-0.19544	1.40194	-0.297198	-0.615297	0.130847	-0.145144	1.17049	1.35004	0.391737	-0.0423195	-0.201084	0.139995	-0.083308	-0.0794584	-0.0237178	-0.593967	0.299698	0.0121576	-0.244906	-0.353342	0.018125	0.109635	-0.277828	-0.97894	-1.01614	-0.337065	-0.0612461	0.101978	0.228602	0.0688848	-0.622276	-0.185377	-0.275382	-0.0491738	-0.393079	-0.0602835	0.197316	-0.233777	-0.221849	-0.209139	-0.0279957	0.00809873	-0.195088	0.250162	-0.166295	-0.143805	0.20781	0.725168	0.0728246
5	0.0149555	1.30919	-0.181687	-0.661513	0.183278	-0.070797	0.834403	1.05556	0.533271	0.213329	-0.369081	-0.0549421	0.0110704	-0.0142634	0.0794909	-0.526225	0.305551	0.0953627	-0.153111	-0.337688	-0.0114561	0.559026	-0.212431	-0.744898	-0.71203	-0.209089	0.00873952	-0.0670307	0.156287	0.0972558	-0.585949	-0.157914	-0.275382	0.0309935	-0.22342	-0.0992217	0.0708534	-0.211518	-0.0932737	-0.0935124	-0.168957	-0.0879097	-0.225763	0.574896	-0.0777948	-0.143805	0.178226	0.947975	-0.0112632
5.25	0.340831	1.03725	0.0301523	-0.559048	0.111065	-0.092077	0.56669	0.762002	0.471847	0.411117	-0.553299	-0.218193	0.0311241	0.0203753	0.229074	-0.414714	0.146291	0.0112166	0.0152357	-0.294945	-0.219598	0.976986	-0.102699	-0.560296	-0.439358	-0.147548	-0.0612461	-0.118874	0.118076	-0.0115639	-0.399272	-0.252673	-0.20532	0.128427	0.0579034	-0.229495	-0.112614	-0.170696	0.000441747	-0.0366189	-0.226969	-0.0520913	-0.28227	0.700849	0.0845099	-0.143805	0.171834	0.853257	-0.127962
5.5	0.452057	0.605758	0.166045	-0.538663	0.00528982	-0.173723	0.368131	0.505408	0.263028	0.387505	-0.602214	-0.217619	0.0809376	-0.101405	0.336336	-0.271086	0.0441616	-0.0883429	0.123229	-0.381766	-0.449922	1.23544	-0.0103137	-0.410551	-0.286299	-0.160748	-0.170344	-0.00739918	0.103046	-0.159102	-0.221298	-0.372359	-0.0768301	0.22545	0.253524	-0.319473	-0.186738	-0.144509	-0.0159781	-0.024637	-0.187362	0.142062	-0.304414	0.545638	0.188627	-0.143805	0.199368	0.551505	-0.120763
5.75	0.260743	0.162957	0.0301523	-0.58214	-0.0166254	-0.2979	0.302872	0.362211	0.073367	-0.0185192	-0.498779	-0.11923	0.063196	-0.215896	0.514154	-0.244485	0.135832	-0.101084	0.0611334	-0.478979	-0.540117	1.31775	-0.0605451	-0.40073	-0.325906	-0.240869	-0.219351	0.0350268	0.0567695	-0.225375	-0.197848	-0.431528	0.00559489	0.373943	0.214715	-0.26331	-0.0579421	-0.148437	-0.049241	0.0490841	-0.134551	0.349532	-0.229497	0.377573	0.0845099	-0.0437254	0.250046	0.333228	-0.0753004
6	0.0469047	-0.194321	-0.181687	-0.460301	0.112446	-0.274817	0.374445	0.339682	-0.0028837	-0.479562	-0.360598	-0.00999006	-0.0516589	-0.190351	0.69837	-0.388856	0.278793	-0.00857841	-0.02304	-0.525606	-0.549267	1.13909	-0.202119	-0.348283	-0.302468	-0.327733	-0.229833	-0.0229321	0.00732602	-0.159102	-0.212923	-0.417223	-0.0768301	0.589856	0.104627	-0.130435	0.076062	-0.148437	0.00420443	0.160227	-0.105368	0.382067	-0.13565	0.318281	-0.0777948	0.139815	0.289775	0.110444	-0.173013
6.25	-0.0653576	-0.291016	-0.276844	-0.23502	0.260613	-0.0830625	0.421506	0.371967	0.00479302	-0.451658	-0.205051	0.00284944	-0.169578	-0.175434	0.680238	-0.486785	0.267406	0.0578648	-0.0446641	-0.483107	-0.55843	0.80552	-0.259474	-0.0444078	-0.00533111	-0.343871	-0.229833	-0.155184	-0.045807	-0.0115639	-0.226226	-0.245223	-0.135258	0.655675	0.0398158	-0.0312967	0.049488	-0.140587	0.093039	0.186059	-0.152761	0.275745	-0.0497835	0.237132	-0.150701	0.257554	0.322164	-0.0799046	-0.276087
6.5	-0.134413	-0.0710318	-0.297198	-0.0429168	0.315409	0.091518	0.410236	0.319006	0.118863	-0.0403549	-0.00782759	-0.0405927	-0.222272	-0.145878	0.485911	-0.439672	0.175731	0.0384834	-0.114835	-0.330778	-0.4545	0.563092	-0.223042	0.417286	0.395267	-0.259633	-0.229833	-0.207474	-0.0635165	0.0830804	-0.303282	0.0541631	-0.0644849	0.544985	0.0323641	-0.00854822	-0.112614	-0.170696	0.0479475	0.0578353	-0.18203	0.275738	0.0258318	0.177639	-0.166295	0.239895	0.317864	-0.157913	-0.230252
6.75	-0.145799	0.039152	-0.297198	-0.0982155	0.155056	0.0896499	0.320093	0.142004	0.195523	0.167767	0.0592207	-0.0807395	-0.262954	-0.0831615	0.269391	-0.354743	0.141526	-0.0438998	-0.199009	-0.142848	-0.17679	0.526169	-0.169405	0.671576	0.600455	-0.167643	-0.229833	-0.147406	-0.0080242	-0.0115639	-0.44973	0.31325	0.00559489	0.420814	-0.0317784	-0.036514	-0.105902	-0.211518	-0.0765532	-0.0841878	-0.13546	0.396686	0.0825479	0.184469	-0.166295	0.239895	0.273741	-0.174599	-0.127561
7	-0.108131	-0.0596573	-0.297198	-0.275266	-0.0535199	0.106783	0.230954	0.00412056	0.232107	0.052968	0.0594756	-0.106117	-0.389415	-0.0197092	0.0915729	-0.3072	0.138685	-0.15492	-0.236819	-0.095751	0.0792658	0.619594	-0.149948	0.4987	0.422854	-0.133176	-0.229833	0.0133668	0.0304271	-0.0786529	-0.510443	0.35331	-0.0768301	0.356394	-0.0684041	0.0127198	0.171141	-0.229855	-0.101942	-0.117001	-0.12429	0.359285	0.145959	0.146869	-0.166295	0.275189	0.196153	-0.174599	-0.0502902
7.25	-0.108592	-0.177668	-0.297198	-0.308742	-0.168143	0.178949	0.129904	-0.022202	0.0904028	-0.267643	0.0433959	-0.131922	-0.445012	-0.0550382	-0.0459113	-0.320801	0.127298	-0.259857	-0.244906	-0.240944	0.0486986	0.745226	-0.163156	0.10272	0.0688582	-0.152672	-0.229833	0.204013	-0.0424325	0.00261154	-0.39928	0.29058	-0.0651953	0.405807	0.0765749	0.151416	0.481081	-0.233777	0.0295822	-0.0547036	-0.186709	0.104654	0.215006	0.0923205	-0.166295	0.139815	0.120289	-0.174599	0.0137469
7.5	-0.19589	-0.13708	-0.297198	-0.190665	-0.226213	0.233767	0.0390538	0.0138685	-0.186693	-0.56138	0.00352247	-0.141926	-0.391884	-0.130591	-0.108786	-0.25031	0.116848	-0.240886	-0.244906	-0.380894	-0.0425633	0.874185	-0.315938	-0.176169	-0.191993	-0.222772	-0.229833	0.294286	-0.17997	0.0830804	-0.172794	0.212704	0.134067	0.526921	0.412166	0.254673	0.507655	-0.233777	0.232624	0.0374459	-0.274974	-0.115845	0.230102	0.0779531	-0.166295	-0.0437254	0.075079	-0.174599	0.0728246
7.75	-0.371275	-0.0296556	-0.297198	-0.13243	-0.338195	0.312923	0.0221956	0.0627279	-0.314858	-0.595453	-0.10838	-0.227884	-0.344054	-0.123401	0.113419	-0.127473	0.0767895	-0.115828	-0.244906	-0.36549	0.0792397	0.886365	-0.458493	-0.187768	-0.217635	-0.284399	-0.229833	0.0868697	-0.272585	-0.0115639	-0.0456711	0.219092	0.356634	0.500834	0.528491	0.225606	0.332823	-0.233777	0.261054	0.0218595	-0.326774	-0.171155	0.178643	0.138955	-0.166295	-0.126171	0.104967	-0.174599	-0.0112632
8	-0.607555	0.0833515	-0.297198	-0.182812	-0.438152	0.330353	-0.0198912	-0.00681585	-0.249642	-0.474328	-0.254748	-0.441748	-0.292351	-0.0884031	0.60562	-0.145971	0.0168024	0.00873955	-0.244906	-0.232682	0.284317	0.721278	-0.449143	-0.0565932	-0.0348603	-0.295798	-0.229833	-0.163397	-0.334322	-0.159102	-0.0964437	0.354372	0.320273	0.281676	0.287785	0.164306	0.130713	-0.233777	0.158461	-0.0454613	-0.364537	-0.107401	0.182823	0.15162	-0.166295	-0.143805	0.227647	-0.174599	-0.127962
8.25	-0.775525	0.0621107	-0.297198	-0.221427	-0.418893	0.272104	-0.133914	-0.167236	-0.12643	-0.265788	-0.389725	-0.662636	-0.1524	-0.144639	0.933039	-0.328308	-0.00979254	0.0411275	-0.244906	-0.0918602	0.143992	0.515143	-0.28887	0.060825	0.157662	-0.270073	-0.229833	-0.212707	-0.275375	-0.225375	-0.25089	0.493161	0.215781	0.0970651	0.0712294	0.260383	0.0300256	-0.233777	0.0360348	-0.0812659	-0.39824	0.00350623	0.27567	0.0957525	-0.166295	-0.0437254	0.335868	-0.0799046	-0.120763
8.5	-0.733401	-0.0992543	-0.297198	-0.203761	-0.305968	0.200539	-0.157449	-0.27848	-0.0589852	-0.0280284	-0.337828	-0.730997	0.0456112	-0.20569	0.696738	-0.463683	-0.0147136	0.0320881	-0.244906	-0.0651795	-0.224703	0.476456	-0.127656	0.0885195	0.175956	-0.182934	-0.170344	-0.170717	-0.135907	-0.159102	-0.426517	0.428745	0.146412	0.0293066	0.0455004	0.39366	-0.071786	-0.233777	-0.0634921	-0.0813481	-0.384999	0.0542239	0.305856	0.0140664	-0.166295	0.139815	0.355965	0.0937587	-0.0753004
8.75	-0.556471	-0.32314	-0.181687	-0.157527	-0.279478	0.172929	-0.0619871	-0.316063	-0.0761699	0.0885258	-0.1626	-0.637401	0.1946	-0.18053	0.256953	-0.452519	-0.0534677	0.0509919	-0.244906	-0.149996	-0.448435	0.619023	-0.0397262	0.0548217	-0.0236196	-0.0602762	-0.0612461	-0.118863	-0.00421306	-0.0115639	-0.597517	0.275825	0.145719	-0.0993879	0.0529144	0.435755	-0.186727	-0.211518	-0.127727	-0.106749	-0.308244	0.00350623	0.243594	-0.0146985	-0.166295	0.257554	0.324749	0.205162	-0.173013
9	-0.360536	-0.456565	0.0301523	-0.147015	-0.414759	0.245949	0.0158997	-0.289741	-0.103404	0.147766	-0.0136766	-0.419353	0.220108	-0.0731236	0.0185779	-0.356912	-0.0690033	0.105229	-0.244906	-0.345951	-0.397694	0.743859	0.027492	0.110165	-0.196337	-0.0136622	0.00873952	-0.155173	0.0562255	0.0830804	-0.648287	0.204787	0.134067	-0.22632	-0.00324141	0.397224	-0.220034	-0.170696	-0.159448	-0.177824	-0.221975	-0.102528	0.13246	0.0496696	-0.166295	0.139815	0.298346	0.0937587	-0.314722
9.25	-0.315998	-0.359093	0.166045	-0.201375	-0.532117	0.283747	-0.0325101	-0.231141	-0.134078	0.0242628	-0.0522786	-0.139964	0.083824	-0.00910846	-0.0459113	-0.222287	-0.0365553	0.139665	-0.244906	-0.389395	-0.146223	0.756335	0.0516948	0.154147	-0.252435	-0.0577526	-0.0612461	-0.295627	0.0606937	-0.0115639	-0.542039	0.249668	0.0756571	-0.247707	-0.0293145	0.381977	-0.0793176	-0.144509	-0.0928641	-0.163829	-0.190479	-0.180901	0.0625101	0.124182	-0.166295	-0.0437254	0.264193	-0.0799046	-0.301107
9.5	-0.31225	-0.149318	0.0301523	-0.181929	-0.543911	0.184946	-0.026568	-0.129645	-0.298305	-0.364423	-0.248403	0.0862878	0.031688	-0.00197222	-0.0862365	-0.059727	0.0084321	0.13737	-0.244906	-0.204892	0.100663	0.708123	-0.0517355	-0.0792783	-0.301989	-0.0763807	-0.170344	-0.41277	-0.0397583	-0.0786529	-0.397425	0.249896	-0.0644849	-0.168427	0.0830525	0.342518	0.130734	-0.148437	0.0387635	-0.0366256	-0.198299	-0.208556	0.0154515	0.175545	-0.0777948	-0.126171	0.25802	-0.157913	-0.134378
9.75	-0.260332	-0.101837	-0.181687	-0.183939	-0.53739	0.111609	0.0878175	-0.050037	-0.440032	-0.568926	-0.305845	0.0891241	0.157574	-0.0340623	-0.0805431	-0.044558	0.127907	0.166543	-0.244906	0.00210774	0.200278	0.617614	-0.147859	-0.392178	-0.375862	-0.0388965	-0.219351	-0.456847	-0.163271	0.00261154	-0.333357	0.0805477	-0.20532	-0.0646524	0.235793	0.276875	0.204448	-0.03714	0.191718	0.155721	-0.199538	-0.213429	0.014393	0.217798	0.0845099	-0.143805	0.284342	-0.0799046	0.143287
10	-0.145887	-0.221716	-0.276844	-0.309799	-0.543348	0.169936	0.117303	-0.00150163	-0.323118	-0.341614	-0.174802	-0.0506036	0.192136	-0.0769849	0.0734413	-0.193092	0.259023	0.156096	-0.244906	0.0246483	0.161785	0.464394	-0.0965686	-0.438684	-0.372424	0.0285298	-0.229833	-0.420537	-0.122151	0.0830804	-0.29345	-0.117014	-0.192974	-0.0507275	0.271013	0.269486	0.149766	0.174821	0.239444	0.260602	-0.201206	-0.213429	0.0925909	0.302813	0.188627	-0.143805	0.317759	0.0937587	0.310398
10.25	-0.0582988	-0.309693	-0.297198	-0.361501	-0.492874	0.250791	0.00327186	-0.0124541	-0.0112369	0.0745477	-0.017992	-0.086269	0.00739321	-0.200484	0.354477	-0.36152	0.356673	0.020863	-0.244906	-0.0450009	0.14011	0.314218	0.0496739	-0.209005	-0.253101	0.0932556	-0.229833	-0.339703	-0.00937286	-0.0115639	-0.247204	-0.214658	-0.0768301	-0.127421	0.175783	0.358125	0.184985	0.275647	0.262957	0.302559	-0.157476	-0.213429	0.195935	0.326632	0.0845099	-0.143805	0.299705	0.205162	0.29823
10.5	-0.107342	-0.459121	-0.297198	-0.261808	-0.411195	0.187649	-0.056045	-0.00713987	0.117351	0.218625	-0.0453849	0.12534	-0.100919	-0.331841	0.445942	-0.416724	0.276104	-0.107559	-0.244906	-0.0794809	0.183446	0.422565	0.137528	0.0046267	-0.147753	0.148384	-0.170344	-0.287849	0.046582	-0.159102	-0.252829	-0.102487	0.00559489	-0.172958	0.112884	0.418449	0.245265	0.103889	0.406748	0.401948	-0.0471347	-0.213429	0.286772	0.251232	-0.0777948	-0.143805	0.235615	0.0937587	0.136852
10.75	-0.227614	-0.621382	-0.297198	-0.197903	-0.37552	0.0462625	-0.0135863	-0.00118563	0.0471861	0.00333806	-0.177673	0.325376	0.168173	-0.416845	0.245227	-0.369604	0.0490948	-0.183461	-0.244906	-0.0571603	0.175532	0.743347	0.132724	0.0542507	-0.119457	0.0888123	-0.0612461	-0.339703	0.13478	-0.225375	-0.293347	0.103207	-0.0768301	-0.0521364	0.200402	0.389906	0.244865	-0.118559	0.625576	0.570144	0.0468854	-0.213429	0.361614	0.135399	-0.150701	-0.143805	0.203863	-0.0799046	0.0337879
11	-0.328374	-0.665838	-0.181687	-0.21595	-0.4036	-0.0321583	0.00958578	-0.0390926	-0.062531	-0.322578	-0.173706	0.297161	0.470255	-0.492559	-0.0116358	-0.309953	-0.154661	-0.1633	-0.244906	0.0103587	0.0530003	0.976981	-0.00628541	0.0655748	-0.0700098	-0.0808627	0.00873952	-0.37646	0.326221	-0.23955	-0.283753	0.219337	-0.20532	0.201965	0.307174	0.32465	0.292395	-0.214167	0.660359	0.62448	0.055474	-0.213429	0.404946	0.0415617	-0.0777948	-0.143805	0.226452	-0.157913	0.00235215
11.25	-0.345652	-0.482052	0.0301523	-0.28125	-0.464311	0.03212	-0.0325101	-0.0710534	-0.218292	-0.45634	-0.0772343	0.102217	0.386269	-0.57907	-0.137029	-0.248146	-0.238554	-0.0729908	-0.244906	-0.00592912	0.0313327	0.852426	-0.14033	0.0540872	-0.0168819	-0.195809	-0.0612461	-0.28786	0.531493	-0.23955	-0.275442	0.125639	-0.263037	0.360228	0.306532	0.349823	0.514357	-0.233777	0.417768	0.443942	-0.00872158	-0.213429	0.376488	-0.00401109	0.0845099	-0.0437254	0.279257	-0.174599	-0.0889255
11.5	-0.318228	-0.250367	0.166045	-0.361303	-0.463814	0.141548	-0.0855131	-0.0334624	-0.413957	-0.350117	0.0818494	-0.0504569	-0.0134566	-0.540824	-0.177355	-0.140636	-0.220166	0.0254789	-0.244906	-0.0725649	0.232069	0.539712	-0.102302	-0.0406824	-0.0333524	-0.222121	-0.170344	-0.118863	0.640665	-0.23955	-0.27749	-0.0389162	-0.20532	0.31495	0.294017	0.460513	0.73154	-0.233777	0.0618221	0.145645	-0.0528938	-0.213429	0.283662	0.00806381	0.188627	0.139815	0.29496	-0.174599	-0.23706
11.75	-0.332139	-0.141264	0.0301523	-0.51886	-0.357412	0.197306	-0.163391	-0.00681585	-0.474131	-0.168085	0.123205	-0.0674767	-0.305076	-0.370202	-0.195486	-0.0494749	-0.149888	-0.0465989	-0.244906	-0.130469	0.399771	0.363696	0.0714475	-0.070603	-0.056274	-0.22269	-0.219351	-0.0380291	0.57048	-0.23955	-0.280465	-0.120745	-0.0768301	0.190803	0.422081	0.552848	0.643162	-0.211518	-0.193491	-0.101664	-0.00463231	-0.213429	0.171991	-0.00142262	0.0845099	0.257554	0.234287	-0.174599	-0.307915
12	-0.385703	-0.149791	-0.181687	-0.776987	-0.27351	0.144375	-0.235318	-0.0710454	-0.324122	-0.00109495	0.0550154	-0.0529768	-0.276671	-0.256975	-0.114827	-0.0190196	-0.0802264	-0.210172	-0.199009	-0.205124	0.391588	0.352444	0.125417	0.018951	-0.0540979	-0.220552	-0.110856	-0.118863	0.350668	-0.23955	-0.336435	-0.106212	0.00559489	0.216584	0.503385	0.638212	0.352265	-0.170696	-0.27261	-0.23262	0.0841762	-0.213429	0.128193	-0.0980377	-0.0777948	0.139815	0.136664	-0.174599	-0.275695
12.25	-0.520619	-0.196788	-0.276844	-0.893655	-0.280795	0.132926	-0.264795	-0.161605	-0.150149	0.102703	-0.0841353	-0.0305856	-0.104153	-0.281716	0.0109226	0.0340204	-0.0183266	-0.281005	-0.0689377	-0.228797	0.162042	0.405923	0.0272751	0.134681	-0.0485931	-0.160387	0.107341	-0.243784	0.179691	-0.23955	-0.350379	-0.0202093	-0.00676795	0.374938	0.5088	0.633618	0.199229	-0.144509	-0.243868	-0.258534	0.120505	-0.213429	0.139415	-0.220023	-0.0622006	-0.0437254	0.0772142	-0.0799046	-0.198415
12.5	-0.620837	-0.248738	-0.181687	-0.792276	-0.351525	0.307535	-0.2711	-0.161605	-0.0952585	0.205758	-0.140119	0.0259649	0.000265802	-0.323538	0.0794995	0.129936	0.0443374	-0.260897	0.0692323	-0.11943	-0.106769	0.466244	-0.0136341	0.159184	-0.0348573	-0.0574467	0.3068	-0.28786	0.144965	-0.23955	-0.242791	0.0805477	-0.00676795	0.490348	0.444502	0.530689	0.178263	-0.170696	-0.188703	-0.231454	0.0647105	-0.185774	0.06758	-0.2892	0.0845099	-0.126171	0.0682833	0.188453	-0.173013
12.75	-0.615065	-0.292983	0.0301523	-0.53212	-0.419896	0.501266	-0.235318	-0.0973679	-0.099289	0.32567	-0.123019	0.0511962	0.0282325	-0.328162	0.0794909	0.202757	0.0408842	-0.162561	0.0692323	0.0726284	-0.18473	0.565883	0.0733504	0.0836338	-0.00176262	0.0249959	0.275927	-0.236006	0.266813	-0.23955	-0.0590047	0.227009	0.0179401	0.456414	0.42905	0.520722	0.156898	-0.211518	-0.170455	-0.22871	0.00754068	-0.135057	-0.0975298	-0.215485	0.188627	-0.0437254	0.0579796	0.47352	-0.198415
13	-0.487217	-0.304146	0.166045	-0.28451	-0.513023	0.469238	-0.169696	-0.102998	-0.093954	0.349274	-0.05272	0.0026951	-0.00688252	-0.357731	0.0794909	0.174892	-0.0042588	0.0505285	-0.0689377	0.173732	-0.0160474	0.632886	0.215768	0.00291974	0.0450708	0.0809146	0.127717	-0.170717	0.472742	-0.23955	-0.0283744	0.338784	-0.0768301	0.316597	0.3683	0.578072	0.225403	-0.229855	-0.190646	-0.261701	-0.0500912	-0.102522	-0.153303	-0.0944666	0.0845099	0.239895	0.0573142	0.47352	-0.23706
13.25	-0.152718	-0.271565	0.0301523	-0.133496	-0.486108	0.309525	-0.091818	-0.167236	-0.157606	0.257789	0.0184475	-0.0629877	-0.00898855	-0.331452	0.194434	0.0306798	-0.120125	0.294226	-0.190921	0.224482	0.214019	0.585472	0.296611	-0.0766797	0.0548095	0.132211	-0.0402818	-0.118863	0.545179	-0.23955	-0.147005	0.429363	-0.20532	0.210146	0.291757	0.523311	0.385971	-0.233777	-0.217966	-0.294603	-0.107518	-0.135057	-0.0615874	-0.0657836	-0.0777948	0.541174	0.103017	0.188453	-0.205233
13.5	0.228966	-0.256845	-0.181687	0.0258166	-0.304257	0.198127	-0.068292	-0.193558	-0.21302	0.20927	0.0596239	-0.141775	-0.0314043	-0.218074	0.370968	-0.0543958	-0.247088	0.35733	-0.236819	0.299375	0.299893	0.415317	0.290414	-0.109326	0.04701	0.116851	-0.170344	-0.111096	0.318942	-0.23955	-0.248662	0.432692	-0.263037	0.161944	0.160135	0.386723	0.535752	-0.233777	-0.243868	-0.296188	-0.136499	-0.185774	-0.0512046	-0.206243	-0.150701	0.541174	0.160737	-0.0632191	-0.120753
13.75	0.357933	-0.293666	-0.276844	0.182857	-0.0738684	0.113458	-0.091818	-0.155967	-0.248369	0.0665471	0.064925	-0.21029	-0.00630302	-0.111239	0.491969	-0.0256343	-0.241403	0.274839	-0.244906	0.373804	0.287382	0.17933	0.103745	-0.154128	-0.0290001	0.0201778	-0.219351	-0.12664	-0.0749597	-0.23955	-0.317299	0.358109	-0.275382	0.159648	-0.00196593	0.335746	0.407357	-0.233777	-0.240097	-0.269111	-0.122999	-0.180901	-0.105159	-0.326076	-0.166295	0.239895	0.178254	-0.0632191	-0.0889255
14	0.207598	-0.345012	-0.297198	0.310549	0.0853696	-0.0204899	-0.163391	-0.0766836	-0.245782	-0.147459	0.0475666	-0.266536	-0.0647368	-0.0749043	0.348775	0.0462865	-0.0802264	0.177619	-0.244906	0.338215	0.270556	-0.050458	-0.0696162	-0.198629	-0.133701	-0.0429326	-0.170344	-0.0670197	-0.284144	-0.159102	-0.323874	0.190272	-0.0651953	0.356867	-0.00968621	0.410015	0.11606	-0.233777	-0.212667	-0.2542	-0.0250076	-0.135057	-0.124703	-0.279501	-0.166295	-0.0260909	0.172423	0.0937587	-0.0184724
14.25	-0.0401953	-0.472589	-0.297198	0.347835	0.0954512	-0.126356	-0.235318	0.0195067	-0.156278	-0.247561	0.0673549	-0.301767	-0.229828	-0.0792446	0.0851843	0.171982	0.100712	0.0989143	-0.244906	0.190014	0.239995	-0.0253615	-0.102085	-0.258364	-0.25355	0.0549797	-0.0612461	0.0578903	-0.264409	-0.0115639	-0.282806	-0.0465996	0.320273	0.765246	0.235538	0.455353	-0.0436985	-0.233777	-0.188703	-0.270696	0.0922127	-0.0748665	-0.148526	-0.0872931	-0.166295	-0.126171	0.204222	0.205162	0.136862
14.5	-0.206098	-0.596106	-0.297198	0.275818	-0.0567637	-0.171032	-0.264795	0.0307751	0.0065429	-0.162285	0.059917	-0.319677	-0.266853	-0.0684733	-0.0398789	0.272814	0.202498	0.0350326	-0.199009	0.0572062	0.166363	0.230876	-0.0404913	-0.25971	-0.30923	0.241778	0.00873952	0.21911	-0.222323	0.163529	-0.200533	-0.199064	0.637611	0.983512	0.507637	0.389987	-0.0175242	-0.233777	-0.199715	-0.305182	0.169136	-0.0566838	-0.168348	0.0705773	-0.166295	-0.143805	0.220697	0.0937587	0.227767
14.75	-0.199414	-0.613338	-0.297198	0.113494	-0.249086	-0.160787	-0.2711	-0.108636	0.0213783	-0.203134	-0.0422551	-0.287275	-0.135027	0.00673714	-0.00557754	0.338554	0.245564	-0.0103221	-0.0689377	0.0877836	0.0621633	0.362031	-0.0751978	-0.294355	-0.396926	0.342376	-0.0612461	0.315488	-0.202944	0.296871	-0.146299	-0.263475	0.518825	0.716504	0.564651	0.236313	0.06893	-0.233777	-0.212779	-0.294694	0.17542	-0.0472114	-0.0726567	0.102609	-0.166295	-0.143805	0.162001	-0.0799046	0.0846014
15	0.0144706	-0.467332	-0.297198	-0.126089	-0.303368	-0.0890513	-0.235318	-0.220205	-0.122261	-0.414921	-0.213838	-0.194912	0.0872951	0.0363305	-0.0233615	0.31501	0.292693	0.0324731	0.161028	0.241245	-0.0114692	0.284352	-0.142751	-0.299266	-0.435284	0.331114	-0.170344	0.190578	-0.213718	0.391515	-0.166433	-0.259738	0.215781	0.236582	0.438488	0.0602836	0.184995	-0.233777	-0.197775	-0.237707	0.125129	-0.0518109	0.143779	0.0376018	-0.0777948	-0.143805	0.0705858	-0.157913	-0.114337
[truncated: 3 more columns]

## Sheet: Figure 2Biii
FA poke onset (sec)	Up											Down
-7	-0.0301162	0.144612	0.200822	0.182552	0.147711	0.0653444	-0.125489	0.465111	-0.372767	-0.661154	-0.0400512	-0.141465	0.107993	0.490674	0.229498	0.667012	0.0835499	0.364695	-0.137518	0.468386	0.0917124	-0.325723	-0.1138	-0.146226	-0.175961	0.199892	0.147946	0.355147	-0.181746	-0.469248	0.33811	-0.0184057	-0.2131
-6.75	0.0636662	0.232111	0.121711	-0.0477227	0.0627248	0.12733	-0.136183	0.625201	-0.325366	-0.750955	-0.110297	-0.206996	0.181973	0.380306	-0.0384469	0.582136	0.210847	0.567621	-0.186547	0.468386	-0.168595	-0.221264	0.0422046	-0.0187745	-0.276475	-0.0350496	0.190235	0.702668	-0.0415253	-0.612905	0.42038	0.0726798	-0.0651734
-6.5	-0.00285921	0.349482	0.0423297	-0.118669	-0.00261291	-0.0230727	-0.148345	0.484093	-0.309934	-0.758329	-0.0276559	-0.237649	0.236302	0.290305	-0.231152	0.47062	0.314417	0.707288	-0.218502	0.157009	-0.419319	-0.0739834	0.191002	0.106438	-0.372778	-0.140584	0.251895	0.624523	0.0195606	-0.662363	0.127592	0.0914019	0.206114
-6.25	-0.160861	0.430008	-0.0700152	0.0244257	0.0290328	-0.1642	-0.16273	0.171344	-0.166836	-0.653335	0.0763976	-0.297412	0.307704	0.308541	-0.0766425	0.458797	0.323366	0.833055	-0.121612	-0.117891	-0.450366	-0.0739834	0.245276	0.114363	-0.416073	-0.163157	0.199638	0.286405	0.119347	-0.608925	-0.186512	-0.0821098	0.380143
-6	-0.328964	0.348434	-0.21531	0.239626	0.149289	-0.246406	-0.22851	0.0721475	0.0633933	-0.486603	0.159039	-0.368336	0.304987	0.305352	0.11382	0.423875	0.243793	0.740319	0.104691	-0.221325	-0.298231	-0.230421	0.172529	-0.00153009	-0.402877	-0.163157	0.0237676	-0.00422996	0.212836	-0.537519	-0.314051	-0.292073	0.206114
-5.75	-0.506357	0.189057	-0.336194	0.278757	0.199984	-0.272655	-0.257993	0.156738	0.253671	-0.30898	0.101171	-0.332448	0.23512	0.254952	0.107162	0.344081	0.162951	0.457432	0.234997	-0.23955	-0.069159	-0.368532	0.0446916	-0.0979278	-0.412773	-0.163157	-0.158433	-0.159216	0.204241	-0.51697	-0.268765	-0.382065	0.082753
-5.5	-0.641292	0.0937266	-0.294989	0.0996777	0.156987	-0.35778	-0.257694	0.124128	0.137478	-0.195708	-0.0524288	-0.187782	0.103968	0.193556	-0.162268	0.245082	0.11188	0.192924	0.207702	-0.136116	0.256177	-0.368532	-0.0212391	-0.103259	-0.441007	-0.163157	-0.190792	-0.205308	0.0530062	-0.502115	-0.140517	-0.346693	0.232179
-5.25	-0.546149	0.100566	-0.0894825	-0.0852831	0.141051	-0.407641	-0.238486	-0.042672	-0.0483244	-0.173675	-0.0400512	-0.115472	0.0620906	0.256507	-0.342622	0.277722	0.0685833	0.0211767	-0.0198607	0.0535751	0.548991	-0.282387	-0.0445539	-0.0806747	-0.417922	-0.163157	0.0132478	-0.213429	-0.106817	-0.512184	-0.0582468	-0.191904	0.380143
-5	-0.322496	0.00698688	0.0802365	-0.167637	0.140091	-0.356245	-0.175758	-0.116511	0.0141568	-0.258268	0.101171	-0.13492	0.190362	0.464747	-0.191288	0.471231	0.0984121	-0.0890131	-0.353248	0.175261	0.576101	-0.169285	-0.0546813	-0.0459815	-0.269584	-0.163157	0.372451	-0.213429	-0.143618	-0.538546	-0.140517	-0.0274761	0.206114
-4.75	-0.172769	-0.177378	-0.0760003	-0.142957	0.0460758	-0.28825	-0.160652	-0.126438	0.171998	-0.376449	0.229285	-0.184209	0.230902	0.519557	-0.0630533	0.542344	0.214004	-0.105517	-0.470905	0.0535751	0.284836	-0.135119	-0.0335701	-0.0246559	-0.0916247	-0.163157	0.551218	-0.213429	-0.0932459	-0.430509	-0.268765	-0.0274761	-0.0651734
-4.5	-0.167277	-0.314982	-0.285387	-0.119156	-0.139313	-0.313211	-0.215633	-0.235247	0.252428	-0.440165	0.27547	-0.223363	0.0918897	0.298734	-0.225291	0.389876	0.285513	-0.0724858	-0.290551	-0.0326822	0.0259794	-0.169285	0.0428782	0.00639485	-0.0221931	-0.163157	0.433512	-0.213429	0.119068	-0.231099	-0.326373	-0.191904	0.108818
-4.25	-0.19326	-0.415994	-0.363937	-0.110705	-0.230154	-0.373939	-0.303403	-0.403238	0.291732	-0.328561	0.254057	-0.258741	-0.0359234	-0.00510053	-0.487756	0.156267	0.216144	-0.105517	-0.0517951	0.0718006	0.118975	-0.169299	0.129239	0.0830658	-0.0513708	-0.0350496	0.248979	-0.213429	0.434024	-0.0321179	-0.338695	-0.337069	0.625328
-4	-0.219227	-0.514775	-0.379015	-0.105269	-0.136383	-0.386584	-0.377014	-0.459697	0.305329	-0.223321	0.0185294	-0.244586	0.057243	-0.180599	-0.586968	-0.018534	0.0772508	0.0818082	0.17209	0.175261	0.237638	-0.0311872	0.219316	0.195548	-0.0814248	0.199892	0.14795	-0.213429	0.71163	0.0399273	-0.338695	-0.282449	0.973386
-3.75	-0.254729	-0.576064	-0.430113	-0.0818674	-0.0127161	-0.459991	-0.559897	-0.531328	0.23578	-0.206609	-0.251501	-0.154608	0.147134	-0.251923	-0.614363	-0.13759	0.0103832	0.458381	0.442991	0.0535751	0.0926412	0.143577	0.222628	0.209267	-0.109629	0.478713	0.131684	-0.167337	0.750051	0.0292088	-0.338695	-0.0371141	0.625328
-3.5	-0.239286	-0.567511	-0.46829	0.022225	0.0145558	-0.572845	-0.702533	-0.63622	0.253385	-0.173558	-0.1565	-0.0607116	0.110663	-0.245828	-0.659968	-0.154351	0.0675747	0.552067	0.597033	-0.136116	-0.133347	0.0732845	0.171561	0.219804	-0.119819	0.562941	0.176668	-0.082808	0.467198	0.0286148	-0.338695	0.191571	0.082753
-3.25	-0.164251	-0.521517	-0.430113	0.113702	-0.0543475	-0.643653	-0.699296	-0.655831	0.339134	-0.106158	0.345716	-0.0330069	0.0976438	-0.188072	-0.663309	-0.114385	0.223482	0.159917	0.418572	-0.221325	-0.174914	-0.178455	0.280918	0.46552	-0.0507794	0.478713	0.306809	0.0175087	0.0493724	0.0444962	-0.338695	0.181934	-0.160969
-3	-0.0240033	-0.458658	-0.402093	0.112796	-0.119098	-0.615966	-0.564901	-0.626918	0.433881	-0.18183	0.851292	-0.06206	0.213715	-0.065173	-0.588324	0.0373103	0.372926	-0.167122	0.17673	-0.23955	-0.0730091	-0.359376	0.529777	0.825217	0.0844065	0.222465	0.415122	0.0939049	-0.341304	-0.123867	-0.338695	0.0175059	-0.2131
-2.75	0.22875	-0.378362	-0.444929	0.134759	-0.126821	-0.588255	-0.445989	-0.654543	0.377214	-0.268261	0.838897	-0.09027	0.287613	0.122106	-0.36784	0.271548	0.361796	-0.166172	0.11931	-0.23955	0.122223	-0.420498	0.707892	0.965167	0.186669	-0.0350496	0.326529	0.194222	-0.590976	-0.299603	-0.268765	-0.108397	-0.2131
-2.5	0.457466	-0.298371	-0.29033	0.266624	-0.0383982	-0.552787	-0.347975	-0.637501	0.155095	-0.263974	0.415962	-0.0936328	0.295294	0.305726	-0.0826581	0.474847	0.21053	0.00467295	0.145422	-0.23955	0.438321	-0.429655	0.901892	0.945633	0.159848	-0.0124765	0.316528	0.240781	-0.685515	-0.187374	-0.140517	-0.182279	-0.2131
-2.25	0.485309	-0.311283	0.0462168	0.289936	0.103863	-0.51608	-0.357922	-0.582598	-0.243451	-0.185301	0.0673452	-0.0943937	0.324752	0.382276	0.0342095	0.499791	0.0911745	0.0662543	0.176951	-0.23955	0.709941	-0.429655	1.18365	1.02407	0.0895933	0.199892	0.691256	0.194222	-0.605882	0.061287	0.0116837	-0.0826637	-0.0651734
-2	0.321071	-0.391421	0.262098	0.119811	0.272153	-0.407099	-0.398248	-0.482045	-0.592568	-0.137179	-0.168165	-0.101173	0.393775	0.452837	-0.00752481	0.453132	0.076891	0.00467295	0.169836	-0.23955	0.656236	-0.377689	1.34912	1.08794	0.11075	0.478713	1.1613	0.102027	-0.422544	0.139421	0.0576616	0.136938	0.206114
-1.75	0.22031	-0.449566	0.125321	-0.103078	0.419881	-0.287326	-0.332743	-0.415369	-0.6425	-0.0228431	-0.321747	-0.00505097	0.333156	0.594762	-0.0278216	0.500861	0.0909007	-0.182676	0.152531	-0.23955	0.484274	-0.230421	1.14619	0.881116	0.126433	0.691049	1.12801	0.0256302	-0.224857	0.000532869	0.0116837	0.300811	0.380143
-1.5	0.222839	-0.412671	-0.0801785	-0.167906	0.50229	-0.199183	-0.270708	-0.350243	-0.587497	0.226222	-0.379615	0.187273	0.140447	0.634034	0.00560505	0.540105	0.0455869	-0.277288	0.159846	-0.23955	0.459204	-0.0739834	0.647469	0.448504	0.0583368	0.841762	0.641708	-0.0746865	-0.00864455	-0.163262	-0.0582643	0.381705	0.206114
-1.25	0.236065	-0.333729	-0.180743	-0.0630384	0.519317	-0.151834	-0.324974	-0.185498	-0.601354	0.419506	-0.391993	0.34094	0.0530964	0.517446	0.0490678	0.49195	0.0561407	-0.182676	0.145422	-0.136116	0.516871	-0.0220175	0.267952	0.173145	0.0124278	0.736228	0.272854	-0.167337	0.207868	-0.191132	-0.000655908	0.574465	-0.0651734
-1	0.189847	-0.327373	-0.327648	0.0113141	0.502522	-0.0871617	-0.458613	0.100323	-0.519706	0.407293	-0.321747	0.374969	0.139173	0.428736	0.179085	0.42186	0.153404	0.00467295	0.0595143	0.0535751	0.426664	-0.083153	0.170834	0.161505	0.0362006	0.328	0.184667	-0.205308	0.289128	-0.145444	0.152254	0.675189	-0.0391081
-0.75	0.16698	-0.303881	-0.43534	0.0393862	0.617615	0.138562	-0.484592	0.356199	-0.214684	0.366973	-0.122675	0.364796	0.2486	0.533112	0.274078	0.472599	0.243911	0.0662543	-0.110634	0.175261	0.212747	-0.160129	0.236639	0.224796	-0.017382	0.115631	0.212465	-0.213429	0.0997511	-0.149202	0.139932	0.455601	0.206114
-0.5	0.475702	-0.0881034	-0.313123	0.113561	1.04632	0.351465	-0.486926	0.521068	0.0601061	0.560939	0.229285	0.313055	0.242392	0.663404	-0.00968476	0.598006	0.177958	0.00467295	-0.173331	0.0535751	0.0305142	-0.221264	0.214608	0.150772	-0.237978	0.222465	0.199831	-0.213429	-0.130332	-0.262739	-0.0705864	0.0367545	0.380143
-0.25	1.00022	0.368375	0.0275144	0.345372	1.64916	0.418472	-0.578489	0.589614	0.132433	0.901986	0.557183	0.113932	0.121238	0.556217	-0.638572	0.508244	-0.0173443	-0.182676	-0.0652474	-0.136116	0.0915572	-0.230421	0.0755067	-0.00721012	-0.506449	0.350605	0.0467334	-0.213429	-0.284615	-0.420234	-0.256443	-0.272825	0.206114
0	1.21836	0.830758	0.406045	0.729163	1.93733	0.464536	-0.629259	0.653027	0.149323	1.02476	0.71007	-0.212476	-0.109212	0.266588	-1.12636	0.16061	-0.193907	-0.37095	-0.0308278	-0.221325	0.34416	-0.212095	-0.101329	-0.157126	-0.666384	0.199892	-0.181394	-0.167337	-0.436115	-0.494593	-0.326373	-0.327445	-0.0651734
0.25	0.70903	1.09598	0.574701	1.02983	1.62649	0.559875	-0.545257	0.723098	0.185594	0.752338	0.639807	-0.390788	-0.422834	-0.0883776	-1.16724	-0.312272	-0.286198	-0.354447	-0.159673	-0.136116	0.507719	-0.282387	-0.217494	-0.258146	-0.635617	-0.0350496	-0.35057	-0.082808	-0.554176	-0.533544	-0.338695	-0.246524	-0.187035
0.5	0.088514	1.06489	0.471944	0.812196	1.06675	0.6777	-0.216496	0.711163	0.0734286	0.313511	0.440735	-0.278986	-0.667886	-0.375224	-0.874182	-0.641762	-0.292181	-0.199179	-0.218507	0.157009	0.382525	-0.377689	-0.252474	-0.279237	-0.410939	-0.140584	-0.386358	-0.0285831	-0.464606	-0.634265	-0.338695	-0.182266	-0.2131
0.75	-0.178708	0.971577	0.36918	0.298464	0.593682	0.683878	0.203575	0.680054	-0.18114	0.0312557	0.25404	-0.0509117	-0.661797	-0.548894	-0.575064	-0.719773	-0.256013	0.00467295	-0.0996514	0.468386	0.121078	-0.420498	-0.279103	-0.260064	-0.152046	-0.163157	-0.325094	-0.0367162	-0.252776	-0.687486	-0.338695	-0.246524	-0.2131
1	-0.231483	0.906747	0.397769	-0.00241163	0.258683	0.487354	0.382549	0.529921	-0.303225	0.022867	0.159021	0.0288418	-0.448922	-0.649227	-0.433976	-0.625712	-0.193789	0.0662543	0.02778	0.468386	-0.0652077	-0.377689	-0.305063	-0.262101	-0.0397605	-0.163157	-0.227301	-0.0367162	-0.0553753	-0.562658	-0.338695	-0.346693	-0.2131
1.25	-0.144803	0.814835	0.440328	0.0211444	0.0227508	0.213247	0.222924	0.264742	-0.188989	0.157732	0.241662	-0.0939418	-0.198455	-0.668787	-0.344863	-0.49272	-0.152394	0.191998	0.0719632	0.157009	-0.187678	-0.282387	-0.316724	-0.296915	-0.0767896	-0.163157	-0.207586	-0.0204615	-0.0229856	-0.341879	-0.338695	-0.391689	-0.2131
1.5	0.0592312	0.645448	0.345061	0.227802	-0.0929107	-0.0254682	-0.0852099	0.14522	0.0465036	0.177315	0.370489	-0.240749	-0.0985869	-0.631358	-0.359651	-0.40626	-0.181486	0.348192	0.121785	-0.117891	-0.213983	-0.11732	-0.319218	-0.32765	-0.192458	-0.163157	-0.227504	-0.082808	-0.0639777	-0.12429	-0.268765	-0.346693	-0.2131
1.75	0.288886	0.424121	0.238715	0.449112	-0.118949	-0.0898528	-0.367202	0.283712	0.168698	0.00440375	0.358111	-0.242086	-0.112192	-0.486568	-0.406251	-0.279623	-0.229086	0.473959	0.0868087	-0.221325	-0.22418	0.012149	-0.319218	-0.339214	-0.315199	-0.163157	-0.211035	-0.167337	-0.201077	-0.000266981	-0.140517	-0.246524	-0.2131
2	0.399773	0.177541	0.16454	0.551362	-0.137921	-0.0347191	-0.430081	0.402633	-0.0744737	-0.272042	0.241662	-0.0924461	-0.0767636	-0.173297	-0.29611	-0.0621468	-0.25095	0.348192	-0.0898669	-0.23955	-0.249348	0.039118	-0.319218	-0.341252	-0.443465	-0.163157	-0.174502	-0.205308	-0.210523	0.0331998	-0.0582468	-0.127646	-0.2131
2.25	0.341886	0.0959485	0.10196	0.484324	-0.149751	0.0650604	-0.218123	0.355874	-0.286837	-0.405011	0.0887753	0.0492293	0.0782053	0.190617	-0.0366909	0.164476	-0.21445	0.0983355	-0.328623	-0.23955	-0.214382	-0.125962	-0.248442	-0.306559	-0.497446	-0.163157	-0.194957	-0.213429	-0.0830227	-0.102508	-0.140517	-0.0917341	-0.2131
2.5	0.250213	0.243771	0.136249	0.365905	-0.144733	0.123056	0.0685882	0.325676	-0.350826	-0.279987	0.112836	0.0409896	0.234796	0.362228	0.0715686	0.180635	-0.177359	-0.0725093	-0.457248	-0.23955	-0.0786754	-0.273757	-0.104489	-0.242934	-0.468066	-0.163157	-0.191711	-0.213429	0.0859082	-0.210178	-0.268765	-0.0730257	-0.2131
2.75	0.18326	0.4927	0.196163	0.352508	-0.105076	0.0667833	0.138362	0.331427	-0.343739	-0.0587226	0.287848	-0.114575	0.306707	0.28553	-0.145094	0.0396709	-0.175444	-0.0118543	-0.387441	-0.136116	0.0159097	-0.212108	0.0188898	-0.202119	-0.388014	-0.163157	-0.115758	-0.213429	0.184631	-0.134153	-0.326373	-0.0821098	-0.2131
3	0.147532	0.617197	0.247261	0.537331	-0.147973	-0.0147551	-0.0488246	0.242872	-0.304188	0.0323877	0.510998	-0.292133	0.34258	0.0985061	-0.466441	-0.118251	-0.180012	0.192948	-0.263457	0.157009	-0.00038319	-0.0220175	0.00654817	-0.219805	-0.283876	-0.163157	-0.00626428	-0.213429	0.245724	0.00807095	-0.338695	-0.127646	-0.2131
3.25	0.0423576	0.555426	0.210986	0.808518	-0.27743	-0.0114925	-0.252733	0.143197	-0.253988	-0.000561594	0.569561	-0.387864	0.366165	0.0390488	-0.569727	-0.156583	-0.158914	0.176444	-0.180425	0.468386	-0.00495238	0.0732845	-0.0713306	-0.229449	-0.24372	-0.163157	0.114682	-0.213429	0.176322	0.0286255	-0.338695	-0.236899	-0.2131
3.5	-0.0614478	0.403854	0.060464	0.812061	-0.322545	0.0439033	-0.252733	0.113686	-0.123958	0.0443344	0.428357	-0.381608	0.352365	0.175695	-0.402431	-0.0340164	-0.103351	-0.105517	-0.138706	0.468386	0.0474566	0.0299483	-0.138942	-0.209611	-0.277754	-0.163157	0.147965	-0.213429	-0.10681	-0.0775901	-0.338695	-0.346693	-0.0651734
3.75	-0.0617657	0.36149	-0.0469449	0.663486	-0.302952	0.0857421	-0.0734522	0.370115	-0.0218278	0.202509	0.25404	-0.303641	0.252732	0.351839	-0.10843	0.163868	-0.0234299	-0.354447	-0.052016	0.157009	0.128504	-0.0739964	-0.222339	-0.229329	-0.277461	-0.163157	-0.00606637	-0.213429	-0.436129	-0.258981	-0.268765	-0.391689	0.206114
4	0.0574582	0.365394	-0.00410907	0.622548	-0.362963	-0.0088224	0.0413269	0.766832	0.0126921	0.25576	0.159021	-0.228786	0.0823372	0.347315	0.0815012	0.295232	0.0234003	-0.448109	0.0450846	-0.117891	0.136876	-0.160129	-0.274258	-0.273786	-0.19527	-0.163157	-0.194226	-0.213429	-0.562778	-0.377515	-0.140517	-0.401313	0.380143
4.25	0.0770682	0.315758	0.055812	0.700379	-0.477113	-0.176625	-0.0910298	0.928923	-0.0296706	0.215905	0.171416	-0.208176	-0.00016	0.265689	0.0835488	0.343473	-0.00479747	-0.464613	0.0729562	-0.117891	0.166755	-0.27323	-0.274115	-0.292839	-0.083114	-0.163157	-0.272304	-0.213429	-0.46432	-0.301917	-0.0582468	-0.346693	0.206114
4.5	-0.065618	0.249175	0.060471	0.641696	-0.480857	-0.339365	-0.350476	0.552647	-0.116122	0.189837	0.101171	-0.211443	0.101785	0.285648	-0.0683749	0.387769	-0.0884191	-0.464613	0.0033553	0.0535751	0.317844	-0.377689	-0.20583	-0.211886	-0.00694359	-0.163157	-0.188272	-0.213429	-0.286229	-0.0813591	-0.140517	-0.246524	0.082753
4.75	-0.227435	0.209935	-0.0186403	0.518069	-0.288891	-0.380776	-0.454708	-0.0448794	-0.201088	0.165681	-0.0524288	-0.144879	0.194072	0.357125	-0.126342	0.399533	-0.151692	-0.464613	-0.0483585	0.278694	0.504002	-0.420498	-0.0903341	-0.0559413	0.0525545	-0.163157	-0.0705666	-0.213429	-0.139977	0.110523	-0.198834	-0.0184057	0.232179
5	-0.353031	0.224377	-0.126326	0.505203	0.0345838	-0.331291	-0.347686	-0.487715	-0.308717	-0.0111222	-0.110297	-0.0319113	0.119054	0.27245	-0.0439322	0.284672	-0.118109	-0.464613	-0.0652474	0.3467	0.548032	-0.429655	0.00223693	0.0720662	0.0980161	-0.163157	-0.0937205	-0.213429	-0.00864455	0.196984	-0.128195	0.327085	0.380143
5.25	-0.482619	0.31851	-0.18236	0.549158	0.301256	-0.185667	-0.223227	-0.666422	-0.36493	-0.363269	-0.0276559	0.0390774	0.114664	0.163784	0.17473	0.216564	0.00511972	-0.464613	-0.114286	0.382128	0.464808	-0.429655	0.0138908	0.0735449	0.102384	-0.0350496	-0.250267	-0.167337	0.161123	0.118045	-0.0582468	0.620029	0.206114
5.5	-0.519975	0.471102	-0.15434	0.421664	0.378479	0.0253897	-0.208435	-0.635148	-0.205885	-0.604554	0.0763976	0.0301926	0.264703	0.150042	0.30779	0.277213	0.159992	-0.464613	-0.214629	0.364926	0.423737	-0.429655	-0.00775405	0.0501787	0.0735854	0.199892	-0.366841	-0.082808	0.312351	0.075692	-0.140517	0.510775	-0.0651734
5.75	-0.316831	0.482807	-0.0749513	0.0839455	0.281055	0.116535	-0.198767	-0.492311	0.106979	-0.568052	0.159039	0.0277242	0.359021	0.0767589	0.1884	0.238536	0.24307	-0.464613	-0.228491	0.382128	0.423847	-0.377689	0.000409239	0.0706845	0.103169	0.350605	-0.393043	0.109692	0.292748	0.150696	-0.268765	0.126746	-0.187035
6	0.016614	0.289048	-0.0565259	-0.151687	0.0719168	-0.0106414	-0.125489	-0.381624	0.287476	-0.345359	0.171416	0.0256831	0.237247	-0.0588233	-0.0220773	0.102447	0.233243	-0.277288	-0.100644	0.364926	0.396642	-0.282387	-0.014423	0.0448505	0.205051	0.199892	-0.380399	0.309056	0.203948	0.257516	-0.326373	-0.0537908	-0.2131
6.25	0.170015	0.103602	-0.121383	-0.171046	-0.074989	-0.210839	-0.170328	-0.281083	0.137224	-0.115128	0.216889	-0.0222366	0.131785	-0.106367	-0.0758329	0.0421472	0.186834	0.0662543	0.0973756	0.278694	0.440959	-0.221251	-0.0312159	-0.0152494	0.289475	-0.0350496	-0.396477	0.479384	0.0864589	0.296678	-0.338695	-0.00822753	-0.2131
6.5	-0.00785353	0.00477011	-0.0801855	-0.0864034	-0.0647458	-0.258517	-0.34343	-0.0930227	-0.111859	-0.0224694	0.440735	-0.0979904	0.0693242	-0.0442183	0.0245015	0.0680611	0.0857416	0.286634	0.159074	0.0718006	0.575974	-0.230421	-0.0303987	-0.0473545	0.311538	-0.140584	-0.439153	0.447798	0.0159268	0.285381	-0.268765	0.0817639	-0.2131
6.75	-0.307154	-0.113133	0.163214	0.0245668	0.0259478	-0.174311	-0.422735	0.118538	-0.170857	-0.119273	0.652202	-0.0669098	0.00851677	-0.00621366	0.0872455	0.0454078	-0.0543867	0.159917	0.10715	-0.136116	0.651678	-0.178455	-0.0853422	-0.099728	0.254028	-0.163157	-0.455231	0.294538	-0.00339706	0.31529	-0.140517	0.117676	-0.2131
7	-0.36933	-0.25226	0.328281	0.0161222	0.0712102	-0.0575155	-0.289815	0.306879	-0.149405	-0.329995	0.627429	0.0933166	0.0440009	0.0942223	0.0796952	0.117807	-0.0896304	-0.0118543	-0.0235233	-0.117891	0.499042	-0.0648268	-0.177376	-0.192598	0.0860366	-0.163157	-0.43227	0.0721779	0.0344736	0.268002	-0.0582468	0.155646	-0.2131
7.25	-0.103377	-0.238742	0.0643581	-0.117086	0.0698243	-0.0758946	-0.148901	0.461724	-0.193506	-0.572766	0.440735	0.257286	0.0502751	0.135712	0.0263588	0.219441	0.0457876	0.0376804	-0.207519	0.0535751	0.173878	-0.0739834	-0.257466	-0.279237	-0.107762	-0.163157	-0.40336	-0.121246	0.119347	0.200525	-0.140517	0.1273	-0.2131
7.5	0.228155	-0.161186	-0.229367	-0.194411	0.0351516	-0.187856	-0.0561627	0.685491	-0.142097	-0.669354	0.183794	0.300735	0.0662372	0.0982548	0.123673	0.240386	0.219443	0.0662543	-0.3567	0.175261	-0.0708793	-0.178455	-0.288413	-0.314048	-0.156481	-0.163157	-0.341365	-0.197186	0.343883	0.150696	-0.268765	0.0817639	-0.2131
7.75	0.276912	-0.13362	-0.223586	-0.116321	-0.0334914	-0.390856	-0.00632005	0.733091	0.0477206	-0.564363	-0.0400512	0.2712	0.0687717	-0.0226945	0.198326	0.12603	0.307395	0.00467295	-0.328829	0.0535751	-0.0942703	-0.221264	-0.234144	-0.271748	-0.0336611	-0.163157	-0.246823	-0.213429	0.726536	0.115086	-0.326373	-0.00822753	-0.2131
8	0.1674	-0.0755655	-0.0139742	-0.0549523	-0.115712	-0.547246	0.0287062	0.483771	0.116052	-0.41004	-0.0400512	0.207298	0.0249489	-0.0165065	0.140593	0.0841837	0.328519	-0.0890131	-0.238832	-0.136116	0.0876755	-0.212095	-0.0571755	-0.115605	0.130401	-0.163157	-0.152474	-0.213429	0.909881	0.157795	-0.338695	-0.191904	-0.2131
8.25	0.114316	0.0861372	0.130264	-0.0818608	-0.181717	-0.427075	-0.017915	0.0827341	-0.0735045	-0.258055	0.101171	0.0860167	0.0372315	0.208596	0.0937337	0.190016	0.329009	-0.105517	-0.214829	-0.221325	0.279497	-0.282387	0.188508	0.0831918	0.12635	-0.163157	-0.113242	-0.213429	0.683425	0.384864	-0.338695	-0.337069	-0.2131
8.5	0.166163	0.278438	0.19095	-0.11462	-0.189352	-0.141285	-0.123873	-0.147784	-0.222794	-0.142016	0.0887929	-0.0769652	0.195213	0.495071	0.233641	0.404634	0.292212	-0.0724858	-0.225611	-0.23955	0.373544	-0.377689	0.344656	0.205077	-0.0319526	-0.163157	-0.0904844	-0.213429	0.265592	0.814185	-0.338695	-0.337069	-0.2131
8.75	0.234391	0.35417	0.318096	-0.0990253	-0.133384	-0.0342971	-0.140596	-0.0686355	-0.107068	-0.0461826	-0.122675	-0.209637	0.376078	0.57874	0.400532	0.57819	0.192144	-0.199179	-0.110839	-0.23955	0.461206	-0.368532	0.287885	0.206556	-0.174298	-0.163157	0.0201307	-0.213429	-0.0305463	1.07333	-0.338695	-0.246524	-0.2131
9	0.341119	0.264148	0.490362	-0.0747209	-0.0852391	-0.149191	-0.135165	0.0875938	0.090344	-0.0560242	-0.309369	-0.245171	0.366174	0.448316	0.356206	0.580169	0.0848754	-0.277288	0.0316479	-0.23955	0.604828	-0.282387	0.101459	0.18386	-0.214596	-0.163157	0.196392	-0.213429	-0.125078	1.11265	-0.338695	-0.182266	-0.2131
9.25	0.37591	0.108449	0.594168	-0.0684771	-0.088573	-0.413523	-0.268229	0.0473395	0.171737	-0.101746	-0.309369	-0.177921	0.151857	0.266716	0.0794415	0.424223	0.040668	-0.182676	0.0412219	-0.136116	0.600436	-0.221251	-0.0280552	0.170923	-0.152557	-0.163157	0.235629	-0.213429	-0.0736432	0.924587	-0.338695	-0.246524	-0.2131
9.5	0.341937	0.0035243	0.439271	-0.0217103	-0.125988	-0.610819	-0.392988	-0.135905	0.161695	0.0248798	-0.122675	-0.085051	0.0202909	0.142786	-0.168896	0.280681	0.0206536	-0.0889896	-0.0762249	0.0535751	0.570381	-0.282387	-0.007084	0.143048	-0.109756	-0.0350496	0.0949626	-0.213429	-0.00835861	0.643663	-0.338695	-0.346693	-0.0651734
9.75	0.26169	-0.0237273	0.154384	0.104214	-0.119336	-0.612621	-0.2879	-0.202798	0.271523	0.183703	0.0887929	-0.0307027	0.0431104	0.17323	-0.130353	0.283039	0.0310314	-0.199179	-0.183105	0.175261	0.565771	-0.325723	0.141577	0.16469	-0.103158	0.199892	-0.0283013	-0.213429	0.00627547	0.357405	-0.338695	-0.391689	0.206114
10	0.195033	0.0394102	-0.06015	0.217026	-0.0534676	-0.457352	-0.0284503	-0.153639	0.26201	0.205504	0.0887929	-0.0287842	0.140575	0.319061	0.0671012	0.386145	0.0893734	-0.37095	-0.276904	0.0535751	0.497984	-0.221264	0.372815	0.230352	-0.0886639	0.350605	-0.0179746	-0.213429	-0.0551035	0.297261	-0.268765	-0.292073	0.528069
10.25	0.160899	0.192344	-0.0933766	0.175429	-0.0025417	-0.309496	0.0960012	0.0283697	-0.0175457	0.0687513	-0.0524288	-0.0400575	0.200034	0.431217	0.30788	0.495807	0.163273	-0.448109	-0.225039	-0.136116	0.184319	-0.0739834	0.573536	0.270617	-0.0839776	0.199892	0.0593675	-0.213429	-0.0553894	0.372481	-0.140517	-0.0371141	0.625328
10.5	0.253405	0.34917	0.00937316	0.0509277	-0.0310868	-0.340326	0.0357448	0.190647	-0.384892	-0.0883894	-0.110297	-0.0155937	0.220191	0.44612	0.513368	0.539977	0.175284	-0.464613	0.0133399	-0.221325	-0.0768629	-0.0739834	0.576711	0.218791	-0.109864	-0.0350496	0.114682	-0.213429	-0.0216437	0.388644	-0.0582468	0.191571	0.528069
10.75	0.414059	0.435788	0.111846	0.0799025	-0.0827538	-0.435227	-0.0708221	0.142616	-0.596843	-0.148817	-0.0979018	0.0557129	0.219603	0.374355	0.519212	0.477195	0.167957	-0.464613	0.298271	-0.23955	-0.027145	-0.230421	0.29287	0.0720546	-0.180145	-0.140584	0.0501773	-0.213429	-0.0736361	0.286614	-0.140517	0.127314	0.232179
11	0.528561	0.356764	0.172809	0.224665	-0.0407559	-0.514852	-0.0976715	-0.127361	-0.415384	-0.130908	-0.0524288	0.155814	0.0692199	0.182683	0.317779	0.291363	0.211711	-0.464613	0.266947	-0.23955	0.229796	-0.368532	-0.0590067	-0.0842084	-0.28571	-0.163157	-0.129523	-0.213429	-0.178133	0.0685924	-0.268765	-0.0280437	-0.0651734
11.25	0.577815	0.220766	0.247254	0.16168	0.0797235	-0.517646	-0.0688996	-0.364594	-0.12466	-0.14086	0.216889	0.20042	-0.134283	-0.0495111	0.0851858	0.103174	0.290945	-0.464613	-0.0629935	-0.23955	0.479653	-0.420498	-0.254305	-0.184447	-0.400507	-0.163157	-0.240148	-0.213429	-0.125357	-0.134369	-0.256443	-0.0178655	-0.187035
11.5	0.538374	0.118062	0.369478	0.00218764	0.224112	-0.373404	0.0364599	-0.362402	0.0550549	-0.207924	0.581956	0.15589	-0.0742568	-0.136948	-0.0624983	0.0487096	0.334529	-0.37095	-0.293447	-0.23955	0.59045	-0.325723	-0.24096	-0.186602	-0.41171	-0.163157	-0.233062	-0.213429	0.00655434	-0.258981	0.0692746	0.0464062	-0.2131
11.75	0.45214	0.15899	0.336813	0.0954836	0.296304	-0.237223	0.074	-0.159217	0.0812649	-0.141237	0.569579	0.0927519	0.159307	-0.10856	-0.190227	0.0780061	0.3606	-0.199179	-0.2698	-0.23955	0.725584	-0.135119	-0.118644	-0.131013	-0.336108	-0.163157	-0.243379	-0.213429	0.043076	-0.36976	0.606219	-0.0371141	0.082753
12	0.396691	0.24469	0.0373936	0.425573	0.312441	-0.254832	-0.00397813	0.0136023	0.04293	0.173375	0.146643	0.101934	0.247486	-0.104658	-0.325879	0.0839697	0.404901	0.00467295	-0.110624	-0.23955	0.834207	-0.0128479	-0.03538	-0.0726325	-0.228397	0.0930582	-0.328533	-0.213429	0.0344665	-0.455638	0.899007	-0.0826637	0.625328
12.25	0.385048	0.212372	-0.285117	0.555681	0.308472	-0.305777	-0.110549	-0.0673352	-0.0251407	0.524377	-0.226746	0.12712	0.191642	-0.163985	-0.358029	0.048114	0.419853	0.159917	-0.0418105	-0.23955	0.832044	-0.135119	0.037062	0.00583873	-0.120326	0.562941	-0.331246	-0.213429	0.0530062	-0.356155	0.606219	-0.00822753	0.973386
12.5	0.340507	0.047065	-0.341144	0.338008	0.334866	-0.220097	-0.182952	-0.156156	-0.167538	0.57284	-0.296992	0.086002	0.0824532	-0.23249	-0.304804	0.0144905	0.368134	0.270107	-0.0556734	-0.23955	0.662792	-0.273757	0.22113	0.18331	-0.0575619	0.864368	-0.250069	-0.213429	0.119354	-0.0849062	0.151527	-0.0274761	0.625328
12.75	0.142606	-0.143947	0.0236203	0.0407719	0.419422	-0.0843584	-0.200537	-0.100338	-0.372506	0.360708	-0.122675	-0.0321959	-0.0138356	-0.276138	-0.307927	-0.0361141	0.282914	0.192948	-0.0518107	-0.23955	0.407548	-0.264074	0.426236	0.352479	-0.078326	0.562941	-0.161863	-0.213429	0.19429	0.0864212	-0.0336202	-0.191904	0.082753
13	-0.0590152	-0.294281	0.466243	-0.0915302	0.448288	-0.0429602	-0.19334	0.0816782	-0.639187	0.184018	0.0887929	-0.176414	-0.0898838	-0.331432	-0.39981	-0.120599	0.258365	-0.105517	-0.00662925	-0.136116	0.216659	-0.169285	0.372429	0.306918	-0.180666	0.0930582	-0.178681	-0.213429	0.184638	0.0284089	-0.0459247	-0.337069	-0.0130429
13.25	-0.121357	-0.319527	0.622203	-0.0285914	0.327864	-0.158614	-0.153053	0.185057	-0.759449	0.118365	0.0887929	-0.297253	-0.152925	-0.391384	-0.459453	-0.201102	0.266092	-0.354447	0.0277747	0.0535751	0.0906364	-0.135119	0.289798	0.249048	-0.286082	-0.118011	-0.126475	-0.213429	0.0493865	-0.0386449	-0.140517	-0.391689	0.206114
13.5	-0.00829847	-0.207625	0.29397	0.146451	0.087539	-0.34519	-0.0963088	0.110748	-0.690603	-0.0060099	-0.122675	-0.346375	-0.154995	-0.40629	-0.427503	-0.245141	0.22247	-0.354447	0.0656309	0.175261	-0.0419627	-0.169285	0.338786	0.31573	-0.292479	-0.163157	0.0205265	-0.167337	-0.201363	-0.00200312	-0.198834	-0.346693	0.380143
13.75	0.0974756	-0.0268078	-0.0986038	0.27471	-0.0923228	-0.433607	-0.0409157	-0.0555734	-0.510627	-0.0828186	-0.239123	-0.325694	-0.0374207	-0.294274	-0.337554	-0.205087	0.116142	-0.105517	0.0939183	0.0535751	-0.0930164	-0.221264	0.340338	0.340797	-0.205733	-0.163157	0.124816	-0.0367162	-0.261957	0.0183456	-0.128195	-0.191904	0.206114
14	0.0811978	0.0533886	-0.227189	0.284994	-0.161065	-0.271473	-0.113024	-0.111077	-0.335649	0.0528517	-0.180543	-0.301761	0.0916883	-0.0259114	-0.187401	-0.0539604	0.0548953	0.270107	0.0106806	-0.0326822	0.0409328	-0.230421	0.188501	0.183424	-0.141867	-0.163157	0.0136486	0.14813	-0.101562	-0.0421867	-0.0582468	0.0271439	-0.0651734
14.25	0.00654928	-0.0247857	-0.220246	0.26195	-0.159387	0.00687613	-0.310745	-0.0395574	-0.163255	0.242125	-0.0400336	-0.283582	0.18186	0.318937	0.0630786	0.229961	0.0711331	0.441878	-0.152358	0.0718006	0.203407	-0.212095	0.023724	0.00638905	-0.137908	-0.0350496	-0.142553	0.232659	0.104448	-0.134364	-0.140517	0.127314	-0.187035
14.5	-0.0202808	-0.164458	-0.187289	0.157627	-0.0189036	0.153129	-0.429929	-0.0106361	-0.111325	0.274572	0.00615176	-0.275169	0.175564	0.450424	0.115814	0.406775	0.163339	0.270107	-0.231944	0.175261	0.240817	-0.230421	-0.0796837	-0.0815032	-0.152409	0.199892	-0.119211	0.14813	0.241035	-0.167025	-0.268765	0.0271439	-0.2131
14.75	0.0232185	-0.209492	-0.15434	0.113154	0.24405	0.0974754	-0.360152	-0.0902257	-0.172328	0.136543	-0.0400336	-0.290843	0.172634	0.364778	-0.0679643	0.366684	0.299067	-0.0890131	-0.207309	0.0535751	0.115729	-0.230421	-0.168069	-0.152222	-0.144967	0.350605	0.0398554	-0.0285947	0.24601	-0.163034	-0.326373	-0.182279	-0.2131
15	0.0568635	-0.121902	-0.112844	0.206095	0.361777	-0.0823827	-0.238179	-0.0773362	-0.257041	-0.0213253	-0.180543	-0.336003	0.136779	0.204567	-0.26773	0.179469	0.41363	-0.354447	-0.0900826	-0.136116	-0.017323	-0.212095	-0.229152	-0.209728	-0.144782	0.199892	0.125009	-0.159216	0.0961243	-0.25897	-0.338695	-0.337069	-0.2131

## Sheet: Figure 2Biv
Immobility onset (s)	Up												Down
-7	-0.238383	-0.0868893	0.192265	0.227124	-0.135245	-0.0538483	0.108614	-0.026851	0.52693	0.143955	0.0462533	0.180103	-0.0903384	0.10945	0.132323	0.277117	-0.0055648	0.146421	-0.061084	-0.0076059	-0.150839	-0.0396713	0.0875487	-0.0221368	-0.0357444	-0.046154	-0.0874314	0.0278482	-0.087714	-0.108534	0.0216352	0.295531	-0.138884	0.0604548	-0.0305428
-6.75	-0.222707	-0.0732921	0.136257	0.101736	-0.159223	0.0144274	0.105142	-0.172016	0.395759	0.128673	0.0839467	0.151526	-0.111777	0.0848681	0.0340674	0.252658	-0.00706929	0.150091	-0.060956	-0.011301	-0.145658	-0.151429	0.119935	0.0455017	-0.00590784	-0.0409698	-0.0629969	0.0278482	0.0135017	-0.180479	0.0304378	0.237419	-0.115876	0.0568253	-0.0303031
-6.5	-0.182785	-0.146038	0.0811037	0.00273955	-0.151775	0.0287045	0.100013	-0.209827	0.49917	0.110283	0.206191	0.0556964	-0.0796992	0.0759715	-0.0356422	0.2139	0.0145734	0.166362	-0.0208063	0.0182731	-0.204732	-0.168707	0.0582741	0.120833	-0.00697511	-0.0280203	-0.0168777	0.0454176	0.173802	-0.240224	-0.000655963	0.0811903	-0.0646555	0.0393042	0.0447829
-6.25	-0.119029	-0.182871	0.0556316	-0.0316264	-0.0691186	0.0352338	0.0760444	-0.156922	0.699977	0.0994656	0.189258	-0.0272818	-0.0612845	0.0803413	-0.0670658	0.159408	0.155759	0.190757	0.123159	0.0320631	-0.23412	-0.0389598	-0.0125517	0.171045	0.0558884	0.0329643	0.0470154	-0.0219716	0.231719	-0.259195	-0.0169903	-0.00915406	-0.031798	0.0276572	0.118972
-6	-0.0462854	-0.154428	0.0784652	-0.0396134	0.0618649	0.0491573	0.0676266	-0.0878371	0.705429	0.0766121	0.0809993	-0.0332568	-0.0783787	0.062041	-0.0290503	0.0621763	0.355544	0.19095	0.285421	-0.057752	-0.194369	0.0996696	0.00822389	0.15482	0.137463	0.0932189	0.0938623	-0.113338	0.118816	-0.234511	0.0032913	0.00273865	-0.0646555	0.0242558	0.174586
-5.75	0.0325356	-0.0999614	0.116987	0.0201815	0.132047	0.0385051	0.0577662	-0.0648882	0.514974	0.0191049	0.103168	0.053852	-0.106969	0.0299581	0.0376018	-0.0195665	0.422619	0.104806	0.352227	-0.110856	-0.180227	0.151578	0.0761126	0.111935	0.115702	0.131047	0.13265	-0.104559	-0.0350492	-0.193983	0.0266037	0.0361527	-0.0879467	0.00255637	0.135643
-5.5	0.0855779	-0.074243	0.135237	0.142655	0.10541	-0.00194704	0.0161778	-0.0459888	0.345256	-0.0987692	0.208274	0.137055	-0.112474	0.0102031	0.0548747	-0.0183354	0.324409	-0.0385238	0.306098	-0.0111049	-0.190036	0.123992	0.0875487	0.129174	-0.0177508	0.201747	0.180453	0.0278482	-0.0734428	-0.131964	0.0271041	-0.00161322	-0.031805	0.00853876	-0.0149964
-5.25	0.110635	-0.0551884	0.111821	0.214839	0.0683407	0.00961529	-0.0320831	0.0500887	0.359134	-0.209049	0.23989	0.172168	-0.0693802	0.017949	0.0498593	-0.000682859	0.179614	-0.183469	0.212672	0.200449	-0.143226	0.100083	0.0198391	0.197737	-0.113555	0.35678	0.30481	0.227645	0.114027	-0.0892925	0.00380241	-0.0469075	0.0473518	0.0413392	-0.140635
-5	0.127257	-0.0580606	0.0850443	0.118466	0.0317542	0.00124862	-0.00949902	0.16126	0.484726	-0.198373	0.16116	0.175658	0.0359579	0.0360846	0.0982455	-0.0368737	0.0767959	-0.238427	0.193393	0.322584	-0.0209008	0.100411	-0.0594813	0.186836	-0.123985	0.53565	0.471278	0.368831	0.372379	-0.116146	-0.0237253	-0.0585436	0.0473518	0.0739087	-0.187908
-4.75	0.155363	-0.0274469	0.0982338	-0.126393	-0.000870079	-0.0416869	0.0643341	0.226063	0.484144	-0.110164	0.129355	0.204125	0.160561	0.0693893	0.141097	-0.127462	0.0851073	-0.196131	0.240148	0.299802	0.1462	0.115744	-0.0802569	0.0887665	-0.129051	0.545332	0.513799	0.51829	0.462208	-0.156752	-0.0410346	-0.0716054	-0.0367263	0.0835235	-0.196238
-4.5	0.168976	0.0171655	0.122881	-0.298	-0.0499343	-0.0951773	0.0634405	0.245195	0.364931	-0.0404696	0.149924	0.190772	0.260329	0.141457	0.124821	-0.217678	0.109946	-0.159607	0.239373	0.177311	0.216819	0.094239	-0.0302067	-0.00529755	-0.119654	0.381005	0.391374	0.709801	0.329201	-0.137023	-0.0414349	-0.0716054	-0.110955	0.052875	-0.196238
-4.25	0.166424	0.0642052	0.113832	-0.335514	-0.0763607	-0.0610167	0.00542136	0.2382	0.289594	-0.0340301	0.147375	0.140739	0.272516	0.214986	0.124733	-0.236033	0.0232856	-0.121603	0.0968414	0.0717171	0.163484	0.0236416	0.00529573	-0.0700927	-0.078661	0.157367	0.20271	0.777202	0.138287	-0.0985272	-0.0177428	-0.0134997	-0.138884	-0.0240278	-0.125328
-4	0.168011	0.0791065	0.080619	-0.283821	-0.0787877	0.00403193	-0.0513781	0.138306	0.257062	-0.0868784	0.143223	0.0911438	0.228121	0.213378	0.144976	-0.21998	-0.140386	-0.0330632	-0.115648	-0.0239414	0.0138064	-0.0186837	-0.0509778	-0.116533	-0.0350193	-0.0190845	0.0355309	0.518795	-0.000444479	-0.133797	-0.007227	0.0436811	-0.115876	-0.0839642	0.00471493
-3.75	0.176304	0.0502721	0.0678476	-0.178904	-0.0776086	0.0196125	-0.0898708	0.0309508	0.238018	-0.121458	0.126855	0.0518978	0.199232	0.14504	0.102219	-0.180646	-0.17215	0.0759189	-0.229255	-0.0943192	-0.0965567	0.0171419	-0.133414	-0.10842	-0.0025716	-0.100148	-0.0699831	0.136266	-0.0872796	-0.202074	-0.0465124	0.0564987	-0.0367263	-0.0818122	0.159046
-3.5	0.17532	0.0255114	0.0915363	-0.105181	-0.110293	0.0134128	-0.10719	-0.0147199	0.260096	-0.104076	0.071133	0.0152434	0.17539	0.0834286	0.0283334	-0.157777	-0.0376574	0.11503	-0.161587	-0.050965	-0.09123	0.0802631	-0.130303	-0.0604264	0.0529054	-0.100405	-0.0978024	0.012637	-0.0988837	-0.278214	-0.107797	-0.0219592	0.0473518	-0.0682413	0.205667
-3.25	0.188145	-0.0353618	0.13858	-0.0816051	-0.12167	-0.0136443	-0.126094	0.0120514	0.359732	-0.0592965	0.0542869	-0.0572792	0.10978	0.0625534	0.0213695	-0.120352	0.158503	0.0725757	0.024975	0.0451006	-0.035593	0.10756	-0.0655256	-0.0221344	0.128774	-0.0984048	-0.096961	0.127993	-0.0567602	-0.320472	-0.167713	-0.067504	0.0473518	-0.101477	0.182682
-3	0.223427	-0.158085	0.170527	-0.00955973	-0.0513386	-0.0344077	-0.104745	0.0192794	0.356764	-0.046502	0.107476	-0.107206	0.016927	0.0809279	0.0987565	-0.0144077	0.250699	-0.0121569	0.155041	0.0416066	0.0456417	0.0665344	-0.0478617	-0.00257369	0.15465	-0.119942	-0.104143	0.286255	-0.00265245	-0.324954	-0.205009	-0.0176073	-0.0367263	-0.0820461	0.10783
-2.75	0.202349	-0.245587	0.127434	0.0569259	0.053013	-0.0113577	-0.0344832	-0.0149411	0.248149	-0.0421009	0.212026	-0.110892	-0.0510365	0.1482	0.114064	0.141483	0.200981	-0.0168649	0.149345	-0.0579531	0.0919058	-0.0218361	-0.10414	0.0144062	0.117914	-0.121773	-0.0988077	0.2604	0.0565995	-0.286387	-0.183687	0.0318008	-0.0830255	0.00470547	0.0600837
-2.5	0.0976972	-0.22943	0.0351674	0.0393336	0.0530893	0.0447935	0.0196018	-0.0149526	0.0867653	-0.0512303	0.246231	-0.084907	-0.0553429	0.254836	0.141449	0.19949	0.105501	0.0923267	0.0508511	-0.0873311	0.0898708	-0.0590834	-0.0980954	0.011614	0.0449947	-0.110178	-0.101457	0.136279	0.109274	-0.214756	-0.148468	-0.0263111	-0.0597343	0.0413479	0.0450167
-2.25	-0.022898	-0.181726	-0.0442856	-0.0778931	-0.0766425	0.0675107	0.00589224	0.0611334	-0.0512262	-0.0635916	0.189916	-0.0722806	0.00105089	0.34774	0.23401	0.118749	0.117988	0.2161	-0.00784413	-0.0309295	-0.00088204	0.00929157	0.0406102	0.0156217	0.00143338	-0.1704	-0.164819	0.0454051	0.0923896	-0.145104	-0.0853676	-0.0428061	-0.031798	-0.00706134	0.0128109
-2	-0.0938644	-0.149201	-0.102456	-0.160446	-0.190454	0.0230189	-0.052206	0.131316	-0.0960624	-0.0846706	0.139678	-0.0573888	0.102952	0.412484	0.25978	0.019098	0.262358	0.234631	0.0404326	0.0448995	-0.113838	0.0848919	0.208416	0.0588217	0.0176291	-0.24857	-0.238425	0.0278482	0.0466171	-0.11628	0.013024	0.0523848	-0.008797	-0.057263	-0.0108315
-1.75	-0.128168	-0.162239	-0.104336	-0.0832397	-0.221807	-0.0632662	-0.0818836	0.0381846	-0.0185597	-0.122466	0.0731736	-0.0755487	0.211349	0.478817	0.199249	0.0681603	0.451458	0.180256	0.189828	0.150293	-0.138048	0.103996	0.258462	0.104323	0.0825323	-0.263744	-0.256155	0.0952373	0.0536671	-0.135706	0.0834167	0.155547	0.0424235	-0.010028	0.0642486
-1.5	-0.133492	-0.199815	-0.0166494	0.0767277	-0.195678	-0.157113	-0.0300163	-0.0651267	0.096315	-0.145816	-0.04197	-0.0889334	0.291118	0.533013	0.206303	0.246798	0.623096	0.144364	0.413101	0.296504	-0.0158722	0.133106	0.176025	0.125994	0.15712	-0.187847	-0.20156	0.119214	0.0379207	-0.17033	0.0614208	0.163069	0.11306	0.0388723	0.241565
-1.25	-0.0513414	-0.185093	0.109475	0.231169	-0.135677	-0.192345	0.0268486	-0.0487135	0.127279	-0.0798408	-0.100032	-0.00758306	0.304519	0.515014	0.31013	0.369498	0.71367	0.18638	0.632251	0.320034	0.168112	0.177406	0.0790408	0.0833589	0.162247	-0.04933	-0.0855288	0.136279	-0.0175462	-0.179896	0.0232408	0.146831	0.121573	0.0873626	0.426983
-1	0.136293	-0.00110438	0.163617	0.375471	-0.0376074	-0.135381	-0.00997147	0.0230962	0.0223127	0.0461659	-0.115562	0.133675	0.256074	0.427789	0.340212	0.439675	0.605176	0.237075	0.742636	0.173621	0.256421	0.189073	0.0260624	-0.0171628	0.104373	0.0694702	0.0595497	0.127993	-0.0786384	-0.128368	0.0361789	0.114849	0.13114	0.0992376	0.498132
-0.75	0.288779	0.269998	0.133148	0.594448	0.0454853	-0.0293461	-0.110897	0.111081	-0.0860586	0.160142	-0.0392616	0.168484	0.124589	0.329453	0.159391	0.516943	0.410243	0.224271	0.672785	0.0285541	0.180211	0.111831	-0.0239789	-0.103846	0.0685383	0.0730867	0.142148	0.0864588	-0.0506635	-0.0340522	0.0511449	0.0230847	0.136344	0.102408	0.40334
-0.5	0.283109	0.389295	0.123615	0.717858	0.0716084	0.0498582	-0.125145	0.184209	-0.0346067	0.213537	0.140286	0.0644173	-0.0943635	0.2297	-0.170992	0.535976	0.285429	0.129581	0.469449	-0.0369789	0.0482268	0.0102234	-0.0657091	-0.159165	0.0242213	-0.0133901	0.115026	-0.0131931	0.0547222	-0.0282465	0.00865919	-0.0178578	0.075281	0.124338	0.210717
-0.25	0.195848	0.320409	0.175634	0.663035	0.0817844	0.0889375	-0.00392413	0.230107	0.188268	0.255675	0.361043	-0.0196845	-0.375139	0.0959656	-0.517471	0.356166	0.232297	-0.0133809	0.240491	-0.113948	0.0238674	-0.00561875	-0.0509823	-0.182197	-0.0525483	-0.104679	0.00807711	-0.113338	0.107291	-0.144502	-0.0406794	0.0361465	-0.031805	0.110659	0.0211346
0	0.153445	0.226094	0.267698	0.613761	0.10842	0.0909074	0.168097	0.336991	0.478107	0.22863	0.456681	-0.0258554	-0.616087	-0.0617055	-0.754346	0.111939	0.128205	-0.0836934	0.0897216	-0.190174	0.138571	0.0650718	-0.0208628	-0.15434	-0.108545	-0.189361	-0.130702	-0.154379	0.0483983	-0.286139	-0.0399857	0.0974349	-0.110955	0.0488049	-0.0736508
0.25	0.152498	0.209146	0.338143	0.689303	0.11337	0.100476	0.244797	0.54424	0.666137	0.0980426	0.356172	0.111151	-0.732504	-0.204903	-0.859308	-0.0124932	-0.0190092	-0.0886399	0.0219089	-0.203015	0.234807	0.0808922	-0.0894128	-0.0650526	-0.0857685	-0.263089	-0.251659	-0.113338	-0.107736	-0.352636	-0.0420118	0.0974349	-0.138884	-0.0124949	-0.0694801
0.5	0.159844	0.232454	0.329474	0.739068	0.0906382	0.177669	0.184687	0.705359	0.758679	-0.0338112	0.157006	0.296153	-0.728843	-0.310274	-0.885084	-0.057127	-0.145579	-0.070052	-0.00154516	-0.173637	0.111783	-0.0162346	-0.168912	0.0446877	-0.0430911	-0.2713	-0.295229	0.0278482	-0.234193	-0.361924	-0.0965331	0.0317946	-0.143805	-0.077745	-0.0386328
0.75	0.195462	0.242196	0.285936	0.677882	0.0844366	0.304305	0.12209	0.716165	0.786258	-0.0611604	0.00783748	0.397934	-0.672706	-0.37164	-0.869444	-0.111647	-0.184464	-0.0853655	-0.0293709	-0.11065	-0.148407	-0.141476	-0.16251	0.0903711	-0.0373237	-0.223677	-0.26986	0.177825	-0.27572	-0.374879	-0.190521	-0.0672535	-0.143805	-0.164811	0.0128109
1	0.189372	0.20756	0.268571	0.53664	0.138523	0.332923	0.0877999	0.659217	0.752882	-0.0135552	-0.0173728	0.322245	-0.618379	-0.3784	-0.78222	-0.17666	-0.118847	-0.101585	-0.0817122	-0.0215871	-0.314109	-0.211437	-0.118683	0.0665172	-0.0401965	-0.153732	-0.206847	0.277464	-0.22071	-0.391326	-0.233366	-0.112548	-0.143805	-0.193548	0.0603234
1.25	0.110403	0.144525	0.279279	0.368514	0.221258	0.207658	0.0628744	0.56042	0.722381	0.00657581	0.0236458	0.1316	-0.532843	-0.322924	-0.620528	-0.164091	-0.0672994	-0.0769349	-0.138223	0.0812656	-0.3416	-0.174077	-0.0833641	-0.00268843	-0.00539465	-0.115502	-0.152288	0.31022	-0.0813075	-0.360966	-0.201531	-0.0672535	-0.143805	-0.130096	0.0561586
1.5	0.0202753	0.09356	0.25532	0.242842	0.312975	0.0580373	0.0849571	0.391214	0.702133	-0.0451995	0.0753189	-0.0215318	-0.377261	-0.221962	-0.444345	-0.0571695	-0.090676	0.00256419	-0.191624	0.101296	-0.278342	-0.0846851	-0.0540939	-0.116483	0.0511054	-0.106931	-0.12879	0.295034	0.0355358	-0.258481	-0.12108	0.0521406	-0.143805	-0.051155	-0.00666074
1.75	0.0200256	0.0698685	0.188603	0.183313	0.359403	0.0131663	0.150157	0.280043	0.660801	-0.11029	0.121194	-0.0867571	-0.194181	-0.126311	-0.342647	0.00544801	-0.11651	0.1443	-0.160362	0.0414005	-0.189887	0.0579773	-0.00943113	-0.191281	0.0353491	-0.148064	-0.166937	0.127993	0.0364312	-0.169907	-0.00126909	0.142729	-0.143805	-0.0531901	-0.00690636
2	0.0686818	0.0574161	0.130135	0.174091	0.354663	0.030778	0.193646	0.307274	0.648382	-0.131428	0.166829	-0.0920891	-0.0774267	-0.0697049	-0.319354	-0.0576452	-0.133174	0.240424	-0.0721014	-0.014599	-0.150839	0.195079	0.00217963	-0.190262	-0.0358339	-0.218284	-0.236259	-0.0136983	-0.012921	-0.141093	0.097502	0.151189	-0.115876	-0.0995614	0.123137
2.25	0.112718	0.0370546	0.0985668	0.185633	0.274165	0.0374718	0.161441	0.368271	0.697799	-0.119246	0.159665	-0.0815293	-0.020339	-0.0442459	-0.237575	-0.13586	-0.127653	0.191918	0.0550013	-0.0241375	-0.145811	0.223604	0.00200055	-0.145306	-0.0988055	-0.253703	-0.265195	-0.00441466	-0.0527481	-0.132566	0.0677741	0.0727308	-0.0367263	-0.102963	0.324986
2.5	0.130565	0.0510507	0.0757102	0.145249	0.217763	0.0138747	0.123572	0.31428	0.685638	-0.097263	0.0746738	-0.00573579	0.00627121	-0.00577996	-0.0472422	-0.150106	-0.104902	0.0504332	0.169762	-0.057752	-0.133562	0.17477	0.0052913	-0.069159	-0.108587	-0.257527	-0.259278	0.0366391	-0.111385	-0.148513	-0.0217204	-0.0134997	0.075281	-0.0472106	0.391079
2.75	0.112366	0.0874637	0.083566	0.0634122	0.208929	0.0179891	0.10911	0.146166	0.480391	-0.0513508	0.00784314	0.0873535	-0.0145003	0.0629731	0.147336	-0.131986	-0.0475711	-0.0515302	0.196765	-0.0709906	-0.0696085	0.156529	0.00822833	0.0247046	-0.0560952	-0.260437	-0.262448	-0.0219716	-0.183866	-0.182057	-0.0150934	-0.0629017	0.126501	0.0562735	0.340287
3	0.0448722	0.0929278	0.0865963	0.00104426	0.20907	0.0684572	0.0982946	-0.0338578	0.156181	-0.00244756	-0.0500244	0.0500617	-0.0658266	0.131709	0.20522	-0.120216	0.0100152	-0.0394207	0.115173	-0.0344285	-0.0207518	0.179296	-0.000936477	0.0685404	-0.00380981	-0.275067	-0.274447	-0.113338	-0.232775	-0.227911	0.0702978	-0.0469075	0.10321	0.150928	0.254059
3.25	-0.0258839	0.0571831	0.0252063	-0.0224196	0.149822	0.101789	0.0581975	-0.125886	-0.087524	0.00442675	-0.0958023	-0.112959	-0.0875553	0.146138	0.158969	-0.0817632	0.100989	0.0199394	0.0620275	0.02507	-0.0426603	0.157403	-0.00943113	-0.00252252	-0.00385401	-0.297143	-0.279693	-0.154379	-0.239467	-0.256616	0.138613	0.0317946	0.0473447	0.145378	0.221853
3.5	-0.0353958	-0.00673085	-0.0391009	-0.0238837	0.0741823	0.0766816	0.0344174	-0.0988876	-0.188144	-0.000425049	-0.0776793	-0.22368	-0.0613896	0.116192	0.0861259	-0.00193838	0.131186	0.109429	0.109412	0.0217721	-0.116281	0.0483268	-0.027095	-0.0917265	-0.0191228	-0.312743	-0.276565	-0.113338	-0.171361	-0.280097	0.169156	0.0974349	0.00105252	0.0793365	0.230429
3.75	-0.00313175	-0.0828087	-0.0513196	-0.0306162	0.0209645	0.02099	0.0895011	-0.0497998	-0.211263	0.0491966	-0.0517035	-0.214316	-0.0321493	0.0867962	0.076067	0.0505587	0.069305	0.200083	0.189869	-0.0544541	-0.131122	-0.064507	-0.0540939	-0.104902	-0.00232104	-0.307238	-0.280485	0.0776679	-0.0505057	-0.289449	0.197498	0.122133	-0.031805	0.0549043	0.178751
4	-0.00256387	-0.142867	-0.0282751	-0.0136999	-0.0274313	-0.00103764	0.15811	-0.03789	-0.201138	0.138772	-0.0453017	-0.0980668	-0.0505938	0.102767	0.126602	0.0763021	0.039391	0.229731	0.193243	-0.14682	-0.0668707	-0.0763171	-0.0387058	-0.0531811	0.0320855	-0.271503	-0.266245	0.319011	0.0136614	-0.242548	0.230793	0.101787	-0.008797	0.0418909	0.0561527
4.25	-0.0386136	-0.153923	0.00714229	0.0441823	-0.0362851	0.0190208	0.203409	-0.110792	-0.154015	0.168501	-0.014186	0.0495283	-0.0389253	0.15455	0.148712	0.0516628	0.0896336	0.22241	0.142646	-0.206509	-0.0330005	0.0139776	-0.0362554	-0.0284596	0.0157686	-0.206246	-0.216592	0.377622	0.0237722	-0.140872	0.245584	0.0317946	0.052273	-0.0266117	-0.0458436
4.5	-0.115406	-0.0813267	0.0386341	0.104951	-0.00699347	0.100814	0.23912	-0.153111	-0.0575989	0.121097	0.0750354	0.142814	0.0335923	0.198432	0.111009	-0.00953686	0.101896	0.185854	0.068571	-0.206509	-0.0478453	0.0928909	-0.0625886	-0.0216034	-0.0132692	-0.137369	-0.157408	0.169034	0.030536	-0.041177	0.238997	-0.0672535	0.075281	-0.0452954	-0.0736508
4.75	-0.175636	0.0242371	0.0390881	0.0851542	0.000174183	0.141675	0.228629	-0.0608503	0.0244846	0.143887	0.165862	0.0814854	0.116489	0.199959	0.0514267	-0.0861583	0.0942611	0.1492	0.0416675	-0.173637	-0.072052	0.0581542	-0.133235	0.0371533	-0.00514518	-0.0941878	-0.121337	-0.0547396	0.0367905	0.0126002	0.203985	-0.112548	0.0424235	-0.0218787	0.00864009
5	-0.163067	0.118297	-0.0021435	0.00406226	-0.0238075	0.0978802	0.188504	0.0921812	0.065568	0.23573	0.168761	-0.0280317	0.12406	0.171055	0.0860186	-0.071399	0.0908478	0.0648715	0.0899855	-0.130479	-0.096404	-0.0333457	-0.168912	0.0819116	0.0254207	-0.064724	-0.103349	-0.0957808	-0.00249852	0.00981945	0.150228	-0.0919514	0.00105252	-0.00909059	0.155115
5.25	-0.126881	0.119316	-0.037755	-0.0379717	-0.0585024	0.0282913	0.121181	0.134268	0.057145	0.274853	0.1719	-0.0769807	0.0927337	0.148361	0.203853	0.019652	0.0981877	-0.0531535	0.157747	-0.0777826	-0.104178	-0.0656906	-0.0802569	0.0574355	0.0108486	-0.039944	-0.0762747	-0.0219716	-0.0720959	-0.0479097	0.120595	-0.0672473	-0.0597343	0.00458852	0.217934
5.5	-0.122614	0.0583529	-0.0687987	-0.0219085	-0.0789403	-0.000556626	0.0903366	0.0689938	0.0249449	0.245349	0.198378	-0.129271	0.113217	0.144453	0.267837	0.120931	0.0163797	-0.0779005	0.109797	0.021571	-0.089333	-0.0191664	0.0698893	0.0328113	-0.0155758	-0.045184	-0.0611034	0.0366391	-0.0988856	-0.123858	0.120423	-0.0716054	-0.115876	0.0317244	0.146779
5.75	-0.164739	0.00604293	-0.0908134	-0.0312344	-0.045137	-0.0348406	0.106552	0.0500829	-0.0676027	0.185753	0.254489	-0.212999	0.175645	0.148717	0.20159	0.150674	-0.0700536	-0.065277	-0.0709124	0.160785	-0.0791193	0.0518195	0.123051	0.070642	0.00644069	-0.112384	-0.0919297	0.0278482	-0.0594369	-0.185889	0.0839927	-0.0716054	-0.0550962	0.0277742	0.0211405
6	-0.173473	-0.0162309	-0.0886169	-0.041635	0.014336	-0.0817876	0.127303	0.123217	-0.127391	0.125971	0.253543	-0.214541	0.195862	0.159676	0.0997392	0.136426	-0.106763	-0.109684	-0.20524	0.230023	-0.141183	0.0658267	0.0167274	0.0927872	0.0634152	-0.188764	-0.147624	0.0278482	-0.0504288	-0.204459	-0.0207826	-0.0628955	0.149502	0.0180395	-0.0972873
6.25	-0.151095	-0.0248106	-0.069256	0.0479341	-0.00240165	-0.0904674	0.113134	0.16126	-0.0633958	0.100967	0.159515	-0.101756	0.152471	0.17851	0.0390941	0.188664	-0.105515	-0.190813	-0.252252	0.164284	-0.194518	0.0418797	-0.112643	0.110203	0.0695439	-0.182028	-0.158615	0.0454176	-0.0662834	-0.17953	-0.0998397	-0.0963033	0.350516	0.00470547	-0.121163
6.5	-0.142266	-0.0689816	-0.0281704	0.119338	-0.0652129	-0.0361651	0.117568	0.0881317	0.075818	0.157267	0.0373504	0.0610395	0.121459	0.191868	0.00638446	0.278326	-0.085262	-0.173387	-0.25911	-0.014599	-0.201998	0.030182	-0.16251	0.0999664	0.0674322	-0.109735	-0.114465	-0.0219716	-0.0204359	-0.164804	-0.0921955	-0.141598	0.317659	-0.0546734	-0.0108315
6.75	-0.124055	-0.0805153	0.0454666	0.148123	-0.0900136	0.0178401	0.124676	0.0120457	0.155733	0.215254	0.0503083	0.153483	0.114869	0.184452	-0.0217942	0.313635	-0.0395946	-0.0481114	-0.201928	-0.163356	-0.119015	0.0303612	-0.165617	0.0559345	0.0974854	-0.0105305	-0.0380832	-0.113338	0.0309818	-0.211762	-0.0263361	-0.112548	0.098282	-0.176347	0.127314
7	-0.041074	-0.0593165	0.145681	0.1246	-0.0850599	0.0114908	0.0577941	0.00418524	0.172106	0.21162	0.170876	0.170214	0.085107	0.147652	-0.0680193	0.22491	0.0292492	0.0955377	-0.117944	-0.219351	0.0138138	0.0290601	-0.171845	0.0446291	0.11929	0.0701727	0.0296059	-0.154379	-0.0382886	-0.295791	0.0242677	-0.0263111	-0.073183	-0.207232	0.15095
7.25	0.0622554	-0.0162348	0.196612	0.0161412	-0.0851362	-0.0316068	-0.0197848	0.077087	0.207057	0.19787	0.260482	0.127913	0.021442	0.0796996	-0.133173	0.0373074	0.048323	0.180962	-0.0770496	-0.190174	0.0649687	0.0128899	-0.154185	0.0931572	0.0938091	0.135582	0.0730392	-0.163157	-0.139664	-0.305301	0.0424606	0.0564987	-0.106033	-0.114379	0.0519878
7.5	0.102199	0.00364569	0.208078	-0.134521	-0.091696	-0.087914	0.0147864	0.111313	0.287438	0.185753	0.219696	0.0596076	-0.0119211	0.00151974	-0.163337	-0.111533	0.0446106	0.246264	-0.0870962	-0.0777826	-0.00102734	-0.0370798	-0.0979119	0.169542	0.0411541	0.156852	0.0858743	-0.113338	-0.13619	-0.219878	0.0436644	0.068379	-0.0646555	-0.0280863	-0.0458436
7.75	0.0809482	0.00581156	0.188223	-0.193531	-0.090008	-0.140153	0.0881038	0.0730433	0.354934	0.166288	0.149183	-0.0238985	0.00343594	-0.0465941	-0.126565	-0.0841456	0.039011	0.233875	-0.111926	0.0416066	-0.0722047	-0.0856102	0.00200055	0.220202	0.0293793	0.109027	0.0576427	-0.0219716	-0.0446201	-0.156431	0.0267727	0.0521406	-0.031798	-0.0612075	-0.0972873
8	0.0760026	-0.0108457	0.165214	-0.0783789	-0.107715	-0.143733	0.116365	-0.0187636	0.395557	0.140853	0.211653	-0.0738195	0.0451145	-0.0407185	-0.020605	0.108718	0.072525	0.161726	-0.125226	0.0614361	-0.054771	-0.0617943	0.0991595	0.229652	0.020938	0.0494759	0.0183501	0.0864588	0.106159	-0.154429	-0.010382	0.0361465	-0.0367263	-0.147293	-0.105617
8.25	0.0767534	-0.0281049	0.115876	0.0673433	-0.1131	-0.0881881	0.123794	-0.102931	0.423018	0.114577	0.394641	-0.0958905	0.0892279	0.00582863	0.184671	0.349114	0.0336859	0.168472	-0.0921095	-0.0215871	-0.0252303	0.0243901	0.114552	0.17862	0.00861902	0.0703175	0.0700311	0.119214	0.243244	-0.14163	-0.0396085	0.0230847	-0.008797	-0.193434	-0.0736449
8.5	0.081584	-0.0717436	0.0852339	0.0718754	-0.0912596	0.00818753	0.174843	-0.148835	0.416514	0.125618	0.423949	-0.0685944	0.129853	0.0437943	0.403685	0.477656	-0.0702436	0.299999	-0.0304419	-0.044173	-0.0919218	0.139753	-0.000936477	0.0972124	-0.00873527	0.238716	0.238526	0.186098	0.280911	-0.0990332	-0.0590871	0.0811903	0.0802023	-0.120712	-0.0386328
8.75	0.135611	-0.15311	0.0823636	-0.0400992	-0.121437	0.0816555	0.233352	-0.111024	0.399888	0.183315	0.285536	0.00557948	0.165412	0.0625185	0.425576	0.385352	-0.109602	0.317523	-0.0451858	0.00193758	-0.216835	0.196571	-0.115755	0.00633958	-0.0206137	0.425828	0.400251	0.269179	0.324339	-0.0855251	-0.0822758	0.147081	0.126501	0.0298092	0.0600837
9	0.207412	-0.193136	0.0657625	-0.125985	-0.208514	0.113518	0.214832	-0.0187578	0.37806	0.243849	0.203804	0.0779952	0.144861	0.0913293	0.274204	0.191934	-0.0366713	0.117267	-0.144134	0.028569	-0.309623	0.222397	-0.156282	-0.099105	0.0247673	0.491184	0.454311	0.286255	0.438081	-0.119067	-0.125966	0.151189	0.10321	0.114181	0.194292
9.25	0.234103	-0.147292	0.0745982	-0.120845	-0.239665	0.114988	0.101173	0.0271456	0.356972	0.231084	0.210844	0.099755	0.106315	0.137629	0.147773	0.0688725	0.0730365	-0.0676884	-0.156379	0.0017365	-0.332086	0.169024	-0.189504	-0.1822	0.0934826	0.393858	0.405126	0.177813	0.574334	-0.126989	-0.145638	0.0727308	0.075274	0.0909921	0.245741
9.5	0.180115	-0.0930917	0.118261	-0.0865243	-0.19295	0.122492	0.0192921	-0.026851	0.385428	0.168145	0.19115	0.127691	0.0792839	0.176439	0.163305	0.138885	0.178603	-0.0602652	-0.0518578	-0.00175754	-0.261061	0.0915449	-0.221891	-0.190362	0.140528	0.260789	0.321029	0.0776679	0.521965	-0.122076	-0.125543	0.0111981	0.0802023	0.0663202	0.150944
9.75	0.0629519	-0.104572	0.133569	-0.0470592	-0.149399	0.124941	0.0478788	-0.102931	0.404939	0.0764702	0.0586658	0.144872	0.0682977	0.200733	0.207952	0.295949	0.241825	0.0215696	0.0149093	0.0390512	-0.177635	0.021891	-0.20112	-0.137095	0.100146	0.206969	0.282216	0.104016	0.297634	-0.138632	-0.0719225	-0.0176073	0.052273	0.0529891	0.0364414
10	-0.083536	-0.136401	0.0610091	0.073826	-0.120624	0.0830454	0.134937	-0.171784	0.244186	-0.041262	-0.0153076	0.105511	0.0483614	0.203615	0.156294	0.453506	0.206155	0.0292721	-0.0937026	-0.00505051	-0.160499	-0.0215611	-0.10414	-0.0755316	0.0637958	0.208392	0.259608	0.169034	0.0590879	-0.146981	-0.0206654	-0.0425495	-0.0367263	-0.010457	0.00166895
10.25	-0.154206	-0.122451	-0.0259512	0.184524	-0.0651366	0.0060975	0.19936	-0.199009	0.0183107	-0.0948905	0.0581309	0.0740757	0.0240471	0.154749	0.0468581	0.560455	0.111231	-0.0134496	-0.214332	-0.0511611	-0.195072	-0.0100995	0.00218406	-0.0673201	0.0758952	0.226793	0.221239	0.227645	-0.0820071	-0.134347	-0.0169746	-0.0919514	-0.110955	-0.143664	-0.0302972
10.5	-0.0946487	-0.0608204	-0.0555583	0.111558	0.00902794	0.0120251	0.269204	-0.061083	-0.077274	-0.0600226	0.14162	0.078102	0.00261226	0.0478397	0.0235317	0.470672	0.0429707	-0.0110016	-0.18825	-0.0507639	-0.214243	0.0689979	0.0198435	-0.0968326	0.0719717	0.208185	0.176793	0.186603	-0.0846049	-0.133493	-0.0497968	-0.141598	-0.110955	-0.226231	-0.105617
10.75	0.00715739	0.0156763	-0.0277366	-0.151483	0.0503571	0.0445888	0.251618	0.218203	-0.0489328	-0.0109744	0.110137	0.0355852	0.000746143	-0.0543908	0.118291	0.213849	0.0235207	0.0239471	-0.0979559	-0.0311256	-0.211654	0.198465	-0.0364345	-0.123143	-0.00227574	0.132335	0.137236	0.0278482	-0.0101654	-0.166959	-0.0906718	-0.137246	-0.0367263	-0.202931	-0.097527
11	0.0414711	0.0361548	-0.016336	-0.378736	0.0604587	0.0431722	0.146096	0.456267	-0.0248077	0.00364505	0.0287169	-0.0704389	0.0084831	-0.0877672	0.206498	0.0285832	-0.0166546	0.0353216	-0.102114	-0.0379225	-0.197661	0.244621	-0.0594813	-0.103259	-0.0808938	-0.00103976	0.0600644	-0.0547396	0.0114248	-0.222935	-0.103334	-0.0963033	0.075281	-0.111091	0.00887977
11.25	0.0155073	0.01795	-0.0175167	-0.343679	0.0755847	0.0227148	0.0362128	0.463257	-0.0431389	-0.0308743	-0.0313665	-0.129389	0.0142626	-0.0697927	0.189672	0.000926522	-0.0756253	0.0501044	-0.16799	-0.0147951	-0.125937	0.154376	-0.0447545	-0.0467586	-0.0879889	-0.110559	-0.045543	-0.0131931	-0.0684412	-0.251866	-0.10575	-0.0672473	0.126501	-0.00897364	0.135409
11.5	-0.0240881	-0.000558428	0.0203329	-0.136521	0.0920424	0.0201958	-0.0193895	0.34104	-0.0923096	-0.0556489	-0.0750238	-0.114273	0.00159961	-0.039464	0.0758054	-0.0241209	-0.125956	0.0784373	-0.186387	0.0252661	-0.0770807	-3.77102e-05	-0.0509778	0.0345029	-0.0604082	-0.145919	-0.0999679	0.0366391	-0.152171	-0.198724	-0.137522	-0.0963033	0.10321	0.014212	0.209593
11.75	-0.0654121	-0.00402388	0.108762	0.0909602	0.0481375	-0.00308766	-0.0377419	0.223333	-0.137389	-0.00831061	-0.162157	-0.0815265	-0.0362277	-0.0230445	-0.0423595	-0.0542523	-0.0732877	0.0333451	-0.138096	0.0448995	-0.0894783	-0.0767847	-0.0802525	0.1202	-0.0750676	-0.151031	-0.0909256	-0.0219716	-0.106189	-0.159271	-0.165113	-0.1169	0.075274	-0.0492427	0.31248
12	-0.12058	0.0453981	0.21717	0.165688	-0.0337074	-0.0785347	-0.0222369	0.119168	-0.125101	0.0188769	-0.207297	-0.0500972	-0.0624984	-0.035803	-0.0798132	-0.0583145	0.040203	-0.0936785	-0.0777695	0.0182731	-0.101589	-0.0463183	-0.101028	0.143002	-0.133457	-0.108932	-0.0396715	-0.113338	0.011421	-0.157703	-0.121809	-0.0672535	0.136061	-0.120598	0.368568
12.25	-0.0978619	0.124985	0.252481	0.0972496	-0.0562885	-0.112115	0.00570904	0.0541324	-0.0495177	0.0196411	-0.163126	-0.0311846	-0.0525642	-0.0714681	-0.0510917	-0.0229016	0.0966736	-0.169643	-0.071607	-0.0276315	-0.0452565	0.00138153	-0.0979119	0.135107	-0.164416	-0.0168977	0.0520922	-0.00491987	0.113751	-0.144366	0.00962942	0.00274485	0.29436	-0.110545	0.241571
12.5	-0.00750284	0.174671	0.196421	-0.034716	0.000532314	-0.103424	0.029592	0.0311835	0.0330292	0.0289039	-0.041759	-0.0592333	0.0133376	-0.0986331	-0.0264968	-0.0535203	0.0215967	-0.155608	-0.063216	-0.0707945	0.00171416	0.0116473	-0.0802525	0.124116	-0.13761	0.0438291	0.101047	0.2604	0.125221	-0.0854873	0.169381	0.00274485	0.480596	-0.0396279	0.0169698
12.75	0.0589718	0.125962	0.126715	-0.0686797	0.0366316	-0.0750549	0.0631867	0.0271398	0.0100247	0.0770728	0.0849252	-0.0777306	0.0581334	-0.108108	-0.0442202	-0.0782165	-0.0861216	-0.114514	0.0351201	-0.0579531	-0.0746371	0.00410307	-0.0364345	0.122991	-0.0912203	0.0197529	0.0565906	0.436232	0.0648386	-0.0485625	0.272087	-0.0469075	0.541666	0.0101448	-0.13647
13	0.0442848	0.0635204	0.0660768	0.0251764	0.0125736	-0.0233968	0.0652298	0.0271398	-0.0678489	0.0918455	0.135351	-0.0664153	0.0407201	-0.103507	-0.0488977	0.000496685	-0.100296	-0.0806034	0.140873	0.0320581	-0.204736	-0.0199059	0.0229552	0.0341155	-0.0640867	-0.0170121	-0.0184682	0.2604	-0.025353	-0.0441092	0.269226	-0.0672535	0.378438	-0.010457	-0.187908
13.25	0.0231444	0.0432692	0.0403816	0.19259	-0.030977	0.0285113	-0.0181229	0.0730375	-0.110519	0.0939786	0.0476074	-0.031297	-0.00695977	-0.0757302	-0.0309985	0.089276	-0.0255764	-0.0829845	0.124838	0.0744736	-0.194526	-0.0760044	0.0582741	-0.102727	-0.0847651	0.012828	-0.0368661	0.0361214	-0.0113763	-0.0387035	0.190016	-0.0381976	0.108125	-0.101479	-0.172601
13.5	0.0538002	0.00360962	0.0505506	0.347032	-0.0850618	0.00793091	-0.06656	0.157211	-0.102557	0.101382	-0.105618	-0.0205123	-0.0111368	-0.0187078	-0.0254882	0.102015	-0.00580113	-0.0819013	0.120989	0.02507	-0.0157232	-0.13067	0.0813165	-0.143345	-0.101195	0.0649299	-0.0287401	0.00436379	0.0812988	-0.0424319	0.0795368	-0.0263111	-0.0452537	-0.112697	-0.129253
13.75	0.0878422	-0.107166	0.0431867	0.316651	-0.135319	-0.0650438	0.00463609	0.188259	-0.0677243	0.102048	-0.186807	-0.0293401	0.020581	0.0448216	-0.0309466	0.0521064	-0.0632755	-0.0469578	0.172108	-0.050965	0.209603	-0.131219	0.132207	-0.0622141	-0.0779393	0.0629913	-0.0327935	0.0366391	0.162046	-0.0856019	-0.0217423	-0.0425495	-0.0268837	-0.0374788	-0.0778097
14	0.0623861	-0.218969	0.0392873	0.175592	-0.145501	-0.112351	0.0902031	0.138073	-0.0350577	0.104482	-0.148161	-0.0683723	0.0864979	0.07764	-0.0194484	-0.00252307	-0.129051	0.00174294	0.196972	-0.0346296	0.307718	-0.0410741	0.143818	0.0314164	-0.0141553	0.0099181	-0.0116359	-0.0219716	0.169498	-0.124745	-0.0518935	-0.0919514	0.0473518	0.0391959	0.0322765
14.25	0.0202329	-0.249038	0.0531167	0.0478919	-0.109042	-0.114048	0.0442634	0.0881259	0.0184415	0.118228	-0.0354139	-0.112956	0.142019	0.0878442	0.00380329	-0.0579719	-0.117456	0.0108772	0.191113	0.0485947	0.214781	0.0148729	0.102092	0.0566203	0.0298696	-0.0600817	0.0243596	-0.063518	0.136957	-0.136965	-0.0617148	-0.141598	0.0473518	0.0794563	0.2374
14.5	0.0467558	-0.20423	0.0730002	0.0475543	-0.0775322	-0.124089	-0.031263	0.0662749	0.0838962	0.19172	0.0436344	-0.134611	0.111413	0.106621	0.0122014	-0.0551772	-0.07143	-0.00527568	0.113098	0.0416066	-0.0105455	-0.0127387	0.0821569	0.0157216	-0.000263929	-0.110237	0.0178697	-0.0131931	0.0547972	-0.110119	-0.0857976	-0.137246	-0.0367263	0.118125	0.388045
14.75	0.111373	-0.127327	0.0607662	0.1618	-0.0691167	-0.101871	-0.00744795	-0.0457561	0.16415	0.2527	0.0173788	-0.161231	0.0508737	0.138487	0.0153873	0.0357587	-0.0614863	-0.0468874	0.0370653	-0.0579531	-0.236013	-0.0591824	0.0553371	-0.0414145	-0.0460931	-0.165606	-0.060574	0.0366391	-0.0684431	-0.0666726	-0.095017	-0.0716054	-0.027167	0.135874	0.332191
15	0.132644	-0.103324	0.0558399	0.237072	-0.0287574	-0.0269926	0.042632	-0.153111	0.192728	0.199796	-0.0329202	-0.149723	0.0389778	0.150663	0.0659966	0.0930982	-0.0872926	-0.0689019	0.00567184	-0.12699	-0.307187	-0.0796549	0.00822833	-0.070615	-0.07405	-0.199828	-0.125716	0.0278482	-0.149133	-0.0315316	-0.0374053	0.0521406	0.0985652	0.0699584	0.194046

## Sheet: Figure 2E
		Unit Type
		Up	Down	Non-responder
	No poke	-0.00956296	0.409454	-0.0150023
		-0.37322	0.04257	0.372241
		-0.262713	0.214403	-0.513673
		-0.01226	-0.330155	-0.0757372
		-0.0677747	-0.00116279	0.0754722
		0.198623	0.312212	-0.0057418
		-0.14605	0.631064	0.0378991
		-0.209575	0.0540742	0.0100705
		-0.272919	-0.0502404	0.0413667
		-0.26838	-0.133875	0.0715575
		-0.024341	-0.0278007	-0.0490669
		-0.15663	0.154795	-0.0754648
		-0.110319	0.00995842	-0.0172365
		0.0335964	-0.123871	-0.019815
		-0.0508228	-0.153617	-0.116992
		0.0280413	0.603123	-0.0600621
		0.12674	0.113081	-0.0404815
		0.021788	-0.137848	0.038808
			-0.0904627	-0.102619
			-0.080849	0.0193075
			-0.00221955	0.158524
			0.0941187	0.0410963
			-0.0530263	-0.0167358
			0.0555691	0.278521
			0.112278	-0.00531736
				-0.0436264
				-0.0110508
				-0.044084
				0.111964
				-0.0334553
				0.0674428
	Low	0.0282451	-0.0319603	-0.0457979
		-0.0274024	0.11237	-0.350731
		-0.00488628	0.010681	0.204583
		-0.0197618	0.100664	-0.0161326
		0.0301128	0.0022253	-0.0327826
		-0.152867	0.00628488	-0.0453272
		0.158694	-0.264998	-0.00841834
		-0.0623017	-0.0692038	-0.0832723
		-0.0391887	-0.0501103	-0.0205855
		-0.0242933	-0.0419049	-0.0276961
		-0.0832298	-0.00208286	0.0603931
		-0.0128477	-0.102656	0.0414793
		0.0362927	-0.126555	0.0446558
		-0.0737511	-0.0499205	0.0404586
		-0.0252435	-0.0540557	0.00158832
		-0.0541401	-0.0773589	0.0616376
		-0.0349474	-0.0499323	0.00987627
		-0.0384551	-0.00436662	-0.0690777
			-0.0820721	-0.0641216
			0.015957	0.0218134
			-0.0146015	0.0323237
			-0.045333	0.00898767
			0.0685209	0.0296182
			-0.0884282	0.0449852
			-0.0225118	0.0242997
				0.0310298
				-0.00366653
				0.00439715
				-0.0510926
				-0.0201174
				-0.0947422
	Mid	0.0658837	-0.0771072	0.122607
		-0.205801	-0.136224	-0.029328
		0.0305349	-0.171463	0.0402869
		-0.0829314	-0.267901	-0.0457632
		-0.0453607	-0.10256	-0.172905
		0.506013	-0.240861	-0.0598431
		-0.00376935	0.0186926	0.0215389
		-0.036351	0.0227906	0.188919
		0.0527651	0.0982828	-0.106341
		0.036671	0.093833	0.335307
		-0.150081	0.000918812	-0.132014
		-0.0142594	0.0949836	0.0996386
		0.0719052	0.0633203	-0.0696398
		0.0237182	0.0961413	0.128512
		0.0295148	0.12113	0.143789
		-0.017793	0.0635398	-0.056216
		-0.0316734	-0.0525237	-0.0393477
		0.00977183	0.0747695	-0.0739595
			-0.075801	0.0139522
			0.0974493	-0.192936
			-0.0922393	-0.0420257
			0.097993	-0.0714363
			-0.1565	0.1997
			-0.110055	-0.52259
			0.0203255	0.191182
				-0.0242324
				0.103658
				-0.01871
				-0.091384
				-0.0386721
				0.0260287
	High	0	0	0
		0	-0.197344	-0.730341
		0	-0.820331	0.554773
		0	-0.165967	-0.234012
		0	-0.350854	0.115221
		0	-0.734412	0.461312
		0.379865	-0.479063	0.00359192
		0.111657	0.331093	0.227657
		0.282725	0.00131468	-0.193925
		0.687957	-0.0328959	-0.0861888
		-0.0382975	0.195282	0.445926
		0.0761778	-0.156267	-0.0782935
		-0.0159825	-0.0878032	0.252756
		-0.151793	-0.163839	0.38096
		0.275714	-0.154352	0.411756
		-0.0621606	-0.369026	-0.102102
		-0.0664152	-0.134581	0.191938
		0.0428105	-0.0822908	-0.114705
			-0.213429	-0.195687
			0.230996	-0.401742
			-0.157445	0.0342045
			-0.124742	-0.0588603
			0	-0.136054
			0	0.591512
			0	-0.214507
				0.390078
				-0.0700049
				-0.0754002
				0.131444
				0.2249
				0

## Sheet: Fig 2AB Units
		Figure 2A				Figure 2B
	Unit type/Event	Light	Go sound	NG sound with FA	Reward	Precue poke	Go poke	FA poke	Freezing onset
	Up	7	13	3	23	18	21	11	12
	Down	15	21	14	28	25	31	22	23
	Nonresponder	52	39	51	22	31	21	35	39

[truncated: 2 more sheets: Figure 2F, Figure 2Gii]
