# Supplementary material for: Dissociation of impulsive traits by subthalamic metabotropic glutamate receptor 4
Source: eLife. 2022 Jan 4;11:e62123. doi: 10.7554/eLife.62123 (PMC8803315; doi:10.7554/eLife.62123)
Supplement: Figure 3—figure supplement 2—source data 1. [file elife-62123-fig3-figsupp2-data1.xlsx]

## Sheet: Fig 3 Fig suppl 2
Figure 3 - figure supplement 2B ii:
	Group
Go: Latency to poke	GFP: No laser	GFP: Laser	Chr2: No laser	Chr2: Laser	Arch: No laser	Arch: Laser
0	2.7027	4.21053	2.29508	2.90909	2.42718	2.95858
1	37.8378	37.8947	40.9836	30.1818	39.8058	17.1598
2	81.6216	80	78.0328	61.0909	71.8447	45.5621
3	89.1892	92.6316	90.4918	77.0909	83.9806	64.497
4	94.0541	96.8421	95.4098	84.3636	90.2913	76.9231
5	96.7568	99.4737	97.7049	91.2727	94.1748	85.2071
6	97.8378	99.4737	99.0164	93.8182	97.5728	89.9408
7	99.4595	99.4737	99.6721	96	98.5437	95.858
8	99.4595	99.4737	100	98.9091	99.5146	98.2249
9	100	100	100	100	100	100
Figure 3 - figure supplement 2C ii:
	Group
FA: Latency to poke	GFP: No laser	GFP: Laser	Chr2: No laser	Chr2: Laser	Arch: No laser	Arch: Laser
0	8.95522	16.2791	4.42478	3.09278	3.61446	5.19481
1	34.3284	27.907	35.3982	17.5258	34.9398	16.8831
2	46.2687	41.8605	46.9027	34.0206	55.4217	31.1688
3	61.194	48.8372	56.6372	44.3299	65.0602	44.1558
4	67.1642	55.814	68.1416	55.6701	77.1084	50.6494
5	71.6418	55.814	77.8761	67.0103	83.1325	61.039
6	77.6119	72.093	83.1858	78.3505	86.747	72.7273
7	82.0896	86.0465	90.2655	86.5979	92.7711	81.8182
8	91.0448	90.6977	94.6903	97.9381	95.1807	93.5065
9	100	100	100	100	100	100
Figure 3 - figure supplement 2D ii:
	Group
Go: Latency to poke	GFP: No laser	GFP: Laser	Chr2: No laser	Chr2: Laser	Arch: No laser	Arch: Laser
0	3.0303	1.78571	2.13904	4.54545	2.33463	1.05263
1	41.2879	39.6429	39.5722	21.4286	35.7977	37.3684
2	82.197	80	79.1444	57.1429	67.7043	54.7368
3	94.3182	92.5	91.4439	78.5714	82.1012	68.4211
4	96.5909	95.7143	94.6524	86.3636	90.2724	73.6842
5	98.4848	97.5	96.2567	91.5584	94.1634	76.3158
6	99.2424	98.2143	97.3262	95.4545	96.4981	83.1579
7	100	98.5714	98.3957	98.7013	97.6654	91.0526
8	100	99.6429	98.3957	100	99.2218	95.2632
9	100	100	100	100	100	100
Figure 3 - figure supplement 2E ii:
	Group
FA: Latency to poke	GFP: No laser	GFP: Laser	Chr2: No laser	Chr2: Laser	Arch: No laser	Arch: Laser
0	6.17284	4.83871	5.33333	2.83019	9.57447	2.94118
1	29.6296	25	33.3333	19.8113	36.1702	29.4118
2	50.6173	49.1935	38.6667	44.3396	48.9362	47.7941
3	64.1975	62.9032	52	59.434	55.3191	58.0882
4	70.3704	70.9677	57.3333	72.6415	65.9574	66.1765
5	80.2469	78.2258	60	81.1321	73.4043	75
6	80.2469	84.6774	73.3333	87.7358	79.7872	81.6176
7	86.4198	89.5161	80	93.3962	85.1064	86.7647
8	96.2963	95.1613	92	96.2264	91.4894	90.4412
9	100	100	100	100	100	100
