# Supplementary material for: Dissociation of impulsive traits by subthalamic metabotropic glutamate receptor 4
Source: eLife. 2022 Jan 4;11:e62123. doi: 10.7554/eLife.62123 (PMC8803315; doi:10.7554/eLife.62123)
Supplement: Figure 3—source data 1. [file elife-62123-fig3-data1.xlsx]

## Sheet: Fig 3B & Fig 3 Suppl Fig 2 BC
Fig 3 Bi & Fig 3 Suppl Fig 2 Bi: Precue response rate
	No laser												Laser
Control	0.0416879	0.0256208	0.012896	0.0255415	0.0195227	0.0185523		0.064525					0.0582255	0.0437508	0.0339179	0.0459513	0.0198076	0.025878		0.0415795
AAV::ChR2	0.03235	0.0351185	0.033202	0.0174135	0.0337661	0.0509003	0.0449253	0.0192253	0.00925677	0.025204	0.0317718		0.0238357	0.0147109	0.0105219	0.0437068	0.0167225	0.00290306	0.0359372	0.00709421	0.00246813	0.0173126	0.0235792
AAV::Arch	0.0327885	0.0588547	0.0243267	0.0346297	0.0234316		0.0531415	0.0296074	0.0155545				0.0996346	0.152167	0.0196467	0.108542	0.103146		0.0361021	0.0405378	0.109609
Fig 3 B I & Fig 3 Suppl Fig 2 Ci: : % of NG trials with FA
	No laser												Laser
Control	44	25.9259	37.037	33.3333	25	37.037		56					44	22.2222	17.8571	30.7692	3.33333	11.1111		47.8261
AAV::ChR2	42.8571	30.7692	38.4615	35.7143	29.6296	53.8462	57.6923	37.931	17.2414	46.4286	27.5862		53.8462	27.5862	26.6667	16	42.3077	46.6667	39.2857	6.89655	23.3333	40	20
AAV::Arch	48.1481	58.3333	33.3333	56	22.2222		44.4444	44	27.5862				63.1579	57.1429	14.2857	68.75	36.3636		43.4783	40.7407	47.8261
Fig 3 B ii: % of correct go trials
	No laser												Laser
Control	100	100	100	100	100	96.2963		100					100	100	100	100	100	100		100
AAV::ChR2	100	100	89.2857	100	100	100	100	100	100	100	100		100	93.3333	70	88	100	79.3103	100	86.6667	100	62.069	83.3333
AAV::Arch	100	100	93.1034	100	100		91.6667	89.6552	100				100	60.8696	93.1034	93.75	100		93.1034	83.3333	100

## Sheet: Fig 3D & Fig 3 Suppl Fig 2 DE
Fig 3 D ii: Precue response rate
	No laser												Laser
Control	0.0203995	0.0292129	0.055482	0.0141355	0.0254498	0.0100824	0.0221362		0.0108955	0.0731985	0.0557825		0.040323	0.0157884	0.0255575	0.020595	0.0133621	0.00547468	0.0102831		0.00478187	0.0227279	0.0256722
AAV::ChR2	0.0205407	0.0275657	0.0595965	0.0199681	0.0720603	0.00787167	0.0327309						0.0155189	0.0184117	0.0894537	0.0453047	0.0325195	0.0111827	0.0392432
AAV::Arch	0.0161614	0.0343254	0.0265715	0.0225592	0.0138911	0.0674534		0.056438	0.0654233	0.0612038	0.0338349		0.0145365	0.0503453	0.0106118	0.00523295	0.00786544	0.034611		0.0276844	0.0572204	0.0811686	0.0516848
Fig 3 D I & Fig 3 Suppl Fig 2 Ei: : % of NG trials with FA
	No laser												Laser
Control	32.1429	37.037	34.6154	22.2222	42.8571	41.3793	14.8148		20.6897	23.8095	38.4615		61.5385	40	79.3103	89.2857	60	16.6667	30		23.3333	28.5714	10.7143
AAV::ChR2	42.8571	25.9259	56.5217	46.6667	55.5556	10.3448	46.1538						22.2222	81.4815	63.1579	90.9091	76	36.6667	69.2308
AAV::Arch	13.3333	33.3333	46.4286	40	30	34.6154		54.1667	56	57.8947	18.5185		34.4828	73.913	79.3103	73.3333	60	84		20.6897	33.3333	41.1765	26.087
Fig 3 D I & Fig 3 Suppl Fig 2 Di: : % of correct go trials
	No laser												Laser
Control	100	100	100	100	96.4286	100	100		88	91.6667	100		100	100	100	100	100	96.5517	100		96.6667	96.5517	100
AAV::ChR2	100	100	100	100	100	100	100						92.8571	86.2069	66.6667	100	96.1538	39.2857	84.6154
AAV::Arch	100	100	100	95.6522	100	100		86.3636	100	92	100		68.9655	80.7692	96.4286	79.3103	93.1034	100		46.1538	54.1667	38.8889	62.963
