# Supplementary material for: Dissociation of impulsive traits by subthalamic metabotropic glutamate receptor 4
Source: eLife. 2022 Jan 4;11:e62123. doi: 10.7554/eLife.62123 (PMC8803315; doi:10.7554/eLife.62123)
Supplement: Figure 4—figure supplement 1—source data 1. [file elife-62123-fig4-figsupp1-data1.xlsx]

## Sheet: Fig 4 - suppl fig 1CD
Figure 4 - supplement figure 1 B: FA							Figure 4 - supplement figure 1 B: Go
Latency to poke	Vehicle: baseline	Vehicle: treatment	Cmp 11: baseline	Cmp 11: treatment			Latency to poke	Vehicle: baseline	Vehicle: treatment	Cmp 11: baseline	Cmp 11: treatment
0	2.58621	2.6087	5.6	4.34783			0	1.64474	0.980392	0	1.03806
1	26.7241	18.2609	27.2	37.3913			1	26.9737	24.183	30.6962	36.6782
2	35.3448	35.6522	45.6	50.4348			2	68.0921	66.3399	71.8354	71.6263
3	46.5517	45.2174	55.2	60			3	83.8816	86.9281	89.2405	85.4671
4	58.6207	56.5217	61.6	68.6957			4	92.1053	93.4641	94.3038	92.7336
5	68.1034	72.1739	68	77.3913			5	94.4079	96.0784	96.2025	96.1938
6	73.2759	79.1304	76.8	83.4783			6	96.0526	98.366	97.7848	96.5398
7	78.4483	84.3478	83.2	89.5652			7	97.3684	99.3464	98.7342	97.9239
8	87.069	92.1739	90.4	94.7826			8	98.3553	99.3464	99.3671	98.6159
9	93.9655	99.1304	96	97.3913			9	99.3421	100	99.6835	100
10	100	100	100	100			10	100	100	100	100
Figure 4 - supplement figure 1 C: FA							Figure 4 - supplement figure 1 C: Go
Latency to poke	Vehicle: baseline	Vehicle: treatment	Cmp 11: baseline	Cmp 11: treatment			Latency to poke	Vehicle: baseline	Vehicle: treatment	Cmp 11: baseline	Cmp 11: treatment
0	2.10526	2.94118	2.89855	6.94444			0	0.222222	0.656455	0.3367	0.398406
1	20	19.6078	17.3913	34.7222			1	27.3333	28.6652	24.2424	37.4502
2	30.5263	37.2549	30.4348	51.3889			2	74	72.2101	68.0135	72.1116
3	41.0526	46.0784	40.5797	61.1111			3	88.6667	87.5274	86.1953	90.4382
4	51.5789	58.8235	55.0725	68.0556			4	93.7778	93.6543	93.6027	96.0159
5	56.8421	65.6863	65.2174	81.9444			5	95.1111	95.8425	95.6229	98.008
6	63.1579	72.549	72.4638	84.7222			6	96.6667	97.1554	96.633	99.2032
7	76.8421	78.4314	81.1594	90.2778			7	98	97.8118	97.9798	99.6016
8	86.3158	82.3529	86.9565	94.4444			8	98.6667	98.6871	98.9899	100
9	94.7368	92.1569	97.1014	95.8333			9	99.5556	99.5624	99.6633	100
10	100	100	100	100			10	100	100	100	100
