# Supplementary material for: Dissociation of impulsive traits by subthalamic metabotropic glutamate receptor 4
Source: eLife. 2022 Jan 4;11:e62123. doi: 10.7554/eLife.62123 (PMC8803315; doi:10.7554/eLife.62123)
Supplement: Figure 4—figure supplement 2—source data 1. [file elife-62123-fig4-figsupp2-data1.xlsx]

## Sheet: Fig 4Ei & Fig 4 - fig suppl 2B
Node	Factor	p value	Corrected p value	F value	Sum Sq
FRP	Impulsivity	0.441787	0.682761	0.591875	0.154318
FRP	Treatment	1.72628e-19	2.0962e-19	83.2549	3.09963
FRP	Impulsivity x Treatment	0.194984	0.253479	1.68069	0.0625731
MO	Impulsivity	0.201572	0.479004	1.63203	0.457891
MO	Treatment	2.99714e-53	2.54757e-52	250.672	10.3788
MO	Impulsivity x Treatment	0.938047	0.731677	0.00604264	0.000250188
SS	Impulsivity	0.80011	0.879977	0.0641301	0.00998435
SS	Treatment	1.75304e-36	7.45044e-36	165.749	5.71111
SS	Impulsivity x Treatment	0.862261	0.700587	0.030109	0.00103745
GU	Impulsivity	0.150084	0.479004	2.073	0.577926
GU	Treatment	8.35653e-30	2.02944e-29	132.892	4.8304
GU	Impulsivity x Treatment	0.991491	0.758199	0.000113773	4.13546e-06
VISC	Impulsivity	0.637273	0.792706	0.222395	0.0375285
VISC	Treatment	5.20558e-19	5.89966e-19	80.9828	2.51921
VISC	Impulsivity x Treatment	0.736775	0.638538	0.113014	0.00351563
AUD	Impulsivity	0.056474	0.479004	3.64229	0.362631
AUD	Treatment	0.707373	0.235791	0.140955	0.00435175
AUD	Impulsivity x Treatment	0.695596	0.620421	0.153139	0.00472789
VIS	Impulsivity	0.530299	0.738031	0.393958	0.0465012
VIS	Treatment	0.000983448	0.000557287	10.8911	0.438812
VIS	Impulsivity x Treatment	0.430946	0.430946	0.620528	0.0250016
ACA	Impulsivity	0.0743546	0.479004	3.18754	0.873564
ACA	Treatment	6.53953e-74	1.11172e-72	360.13	14.967
ACA	Impulsivity x Treatment	0.837634	0.695058	0.0420037	0.00174568
PL	Impulsivity	0.184939	0.479004	1.75871	0.77758
PL	Treatment	9.15164e-26	1.55578e-25	113.289	5.7659
PL	Impulsivity x Treatment	0.905847	0.72098	0.0139935	0.00071221
ILA	Impulsivity	0.124429	0.479004	2.36267	1.00185
ILA	Treatment	3.35758e-43	1.90263e-42	199.358	9.39991
ILA	Impulsivity x Treatment	0.636145	0.590706	0.223889	0.0105566
ORB	Impulsivity	0.146546	0.479004	2.10949	0.875909
ORB	Treatment	1.06663e-34	3.62654e-34	156.916	7.09804
ORB	Impulsivity x Treatment	0.383901	0.394004	0.758509	0.0343108
AI	Impulsivity	0.0893079	0.479004	2.88964	0.852524
AI	Treatment	2.20609e-26	4.16705e-26	116.274	4.42972
AI	Impulsivity x Treatment	0.222587	0.273636	1.48855	0.0567098
RSP	Impulsivity	0.308986	0.54689	1.03554	0.113848
RSP	Treatment	1.16779e-15	1.24078e-15	65.1923	2.93071
RSP	Impulsivity x Treatment	0.224522	0.273636	1.47616	0.0663603
PTLp	Impulsivity	0.25359	0.479004	1.30418	0.127909
PTLp	Treatment	1.50158e-19	1.96361e-19	83.5422	2.87788
PTLp	Impulsivity x Treatment	0.534653	0.521287	0.385674	0.0132858
TEa	Impulsivity	0.805004	0.879977	0.0609643	0.0094367
TEa	Treatment	0.103933	0.0464965	2.64656	0.102579
TEa	Impulsivity x Treatment	0.136278	0.204416	2.2213	0.0860958
PERI	Impulsivity	0.331999	0.54689	0.941548	0.0775191
PERI	Treatment	0.167898	0.0696162	1.90301	0.0528882
PERI	Impulsivity x Treatment	0.0279361	0.0775159	4.83914	0.134489
ECT	Impulsivity	0.535434	0.738031	0.384203	0.0584371
ECT	Treatment	0.331013	0.119728	0.945396	0.0403148
ECT	Impulsivity x Treatment	0.104388	0.16963	2.63962	0.112562
PIR	Impulsivity	0.136666	0.479004	2.2169	0.337091
PIR	Treatment	1.56477e-08	1.10838e-08	32.2392	0.862735
PIR	Impulsivity x Treatment	0.00533325	0.0173331	7.78005	0.208198
MOB	Impulsivity	0.571334	0.76679	0.32067	0.0738794
MOB	Treatment	2.59191e-09	1.91576e-09	36.1315	1.19955
MOB	Impulsivity x Treatment	0.0916264	0.168311	2.85111	0.0946553
HIP	Impulsivity	0.140925	0.479004	2.16957	0.321425
HIP	Treatment	0.695899	0.235791	0.152818	0.00712358
HIP	Impulsivity x Treatment	0.000278828	0.00306735	13.2551	0.617883
ENT	Impulsivity	0.73209	0.879977	0.117234	0.0102892
ENT	Treatment	0.0287664	0.0143832	4.78853	0.20631
ENT	Impulsivity x Treatment	0.000830382	0.00359832	11.2065	0.482824
CP	Impulsivity	0.180506	0.479004	1.79472	0.463478
CP	Treatment	1.30836e-30	3.70702e-30	136.824	5.46629
CP	Impulsivity x Treatment	0.133944	0.204416	2.24803	0.0898112
ACB	Impulsivity	0.133611	0.479004	2.25189	0.533665
ACB	Treatment	1.13207e-19	1.60377e-19	84.1243	3.12911
ACB	Impulsivity x Treatment	0.101398	0.16963	2.68591	0.0999059
FS	Impulsivity	0.102358	0.479004	2.67089	0.362745
FS	Treatment	1.10151e-13	1.10151e-13	55.9681	1.50948
FS	Impulsivity x Treatment	0.0894643	0.168311	2.88682	0.0778585
OT	Impulsivity	0.593297	0.774211	0.285317	0.047098
OT	Treatment	3.12464e-13	2.95105e-13	53.862	1.39985
OT	Impulsivity x Treatment	0.0318014	0.0775159	4.61571	0.119961
LSX	Impulsivity	0.233813	0.479004	1.41838	0.360408
LSX	Treatment	6.69149e-29	1.42194e-28	128.489	6.05384
LSX	Impulsivity x Treatment	0.270369	0.292899	1.21556	0.0572716
AMY	Impulsivity	0.109711	0.479004	2.56068	0.280707
AMY	Treatment	0.237755	0.087866	1.3947	0.0332858
AMY	Impulsivity x Treatment	0.0003146	0.00306735	13.0274	0.310911
PALd	Impulsivity	0.339154	0.54689	0.91407	0.0995297
PALd	Treatment	0.00224472	0.00123098	9.36227	0.27767
PALd	Impulsivity x Treatment	0.00223059	0.00790847	9.3739	0.278015
PALv	Impulsivity	0.607225	0.774211	0.264321	0.0558861
PALv	Treatment	2.37085e-10	1.83202e-10	40.5546	1.12402
PALv	Impulsivity x Treatment	0.594583	0.565579	0.283336	0.00785299
PALm	Impulsivity	0.76253	0.879977	0.0913256	0.0209849
PALm	Treatment	1.24222e-12	1.11146e-12	51.0796	1.65946
PALm	Impulsivity x Treatment	0.194141	0.253479	1.68705	0.0548085
PALc	Impulsivity	0.874534	0.910229	0.0249395	0.00474622
PALc	Treatment	2.14935e-12	1.82695e-12	49.976	1.68185
PALc	Impulsivity x Treatment	0.000125712	0.00245138	14.7635	0.49684
TH	Impulsivity	0.238489	0.479004	1.39034	0.136023
TH	Treatment	3.11779e-07	1.96306e-07	26.356	1.06176
TH	Impulsivity x Treatment	0.188949	0.253479	1.72698	0.0695719
HT	Impulsivity	0.753241	0.879977	0.098855	0.010186
HT	Treatment	0.145342	0.0617703	2.12214	0.0544473
HT	Impulsivity x Treatment	0.000571814	0.00318582	11.9042	0.305424
MB	Impulsivity	0.899635	0.917628	0.015915	0.00406681
MB	Treatment	9.73723e-05	5.91189e-05	15.3121	0.770581
MB	Impulsivity x Treatment	0.0597005	0.13696	3.55386	0.178848
IC	Impulsivity	0.31502	0.54689	1.01003	0.118449
IC	Treatment	1.84289e-08	1.25316e-08	31.9162	1.2048
IC	Impulsivity x Treatment	0.0949449	0.168311	2.79114	0.105362
SC	Impulsivity	0.477783	0.716674	0.504112	0.0905384
SC	Treatment	0.176155	0.0713008	1.83108	0.0815388
SC	Impulsivity x Treatment	0.243996	0.279878	1.35816	0.0604797
CB	Impulsivity	0.253427	0.479004	1.30507	0.0872429
CB	Treatment	2.55103e-25	3.94251e-25	111.141	3.77721
CB	Impulsivity x Treatment	0.0903589	0.168311	2.87077	0.0975656
RHP	Impulsivity	0.0586079	0.479004	3.58049	0.501277
RHP	Treatment	0.429786	0.152216	0.623659	0.0347736
RHP	Impulsivity x Treatment	0.0302376	0.0775159	4.7025	0.262199
NBM	Impulsivity	0.246752	0.479004	1.3424	0.186293
NBM	Treatment	0.0909035	0.0417665	2.86109	0.0859433
NBM	Impulsivity x Treatment	0.23632	0.279287	1.40326	0.0421522
PAG	Impulsivity	0.240288	0.479004	1.37973	0.372197
PAG	Treatment	2.62279e-07	1.7149e-07	26.6945	1.16049
PAG	Impulsivity x Treatment	0.000708734	0.00345508	11.5024	0.500045
MRN	Impulsivity	0.0575524	0.479004	3.61075	0.897111
MRN	Treatment	0.07937	0.0374803	3.08093	0.170375
MRN	Impulsivity x Treatment	0.00122398	0.00477352	10.4841	0.57977
OLF	Impulsivity	0.972692	0.972692	0.00117217	0.000149603
OLF	Treatment	0.000122302	7.16943e-05	14.8158	0.353056
OLF	Impulsivity x Treatment	0.169828	0.245307	1.88584	0.044939
VTA	Impulsivity	0.842903	0.895585	0.0392861	0.00458152
VTA	Treatment	0.199636	0.0754179	1.64614	0.0752248
VTA	Impulsivity x Treatment	0.255552	0.284758	1.29345	0.0591075
PB	Impulsivity	0.252565	0.479004	1.30982	0.189654
PB	Treatment	0.00295796	0.00157142	8.85521	0.372423
PB	Impulsivity x Treatment	0.0807036	0.168311	3.0538	0.128433
COA	Impulsivity	0.512235	0.738031	0.429654	0.0425579
COA	Treatment	2.88386e-11	2.33455e-11	44.7644	1.2407
COA	Impulsivity x Treatment	0.780991	0.662144	0.0773206	0.00214304
ZI	Impulsivity	0.211045	0.479004	1.56526	0.178253
ZI	Treatment	0.508654	0.176472	0.436993	0.0122667
ZI	Impulsivity x Treatment	0.000551962	0.00318582	11.9705	0.33602
STN	Impulsivity	0.121499	0.479004	2.39996	0.244594
STN	Treatment	0.124882	0.0544357	2.357	0.0600294
STN	Impulsivity x Treatment	7.69872e-06	0.00030025	20.1179	0.512375
PRNr	Impulsivity	0.343147	0.54689	0.899071	0.147794
PRNr	Treatment	0.0534558	0.0259643	3.73407	0.189718
PRNr	Impulsivity x Treatment	0.0154593	0.046378	5.87354	0.298419
CSm	Impulsivity	0.143311	0.479004	2.14375	0.468499
CSm	Treatment	0.0207029	0.0106651	5.36023	0.238639
CSm	Impulsivity x Treatment	0.000431325	0.00318582	12.4334	0.553539
SN	Impulsivity	0.15196	0.479004	2.05405	0.206682
SN	Treatment	0.188831	0.0746541	1.72791	0.0738689
SN	Impulsivity x Treatment	0.380901	0.394004	0.768136	0.0328382
MY	Impulsivity	0.81096	0.879977	0.0572264	0.00839954
MY	Treatment	0.193913	0.0749207	1.68879	0.0581679
MY	Impulsivity x Treatment	0.699962	0.620421	0.148555	0.00511676
