# Supplementary material for: Dissociation of impulsive traits by subthalamic metabotropic glutamate receptor 4
Source: eLife. 2022 Jan 4;11:e62123. doi: 10.7554/eLife.62123 (PMC8803315; doi:10.7554/eLife.62123)
Supplement: Figure 4—source data 1. [file elife-62123-fig4-data1.xlsx]

## Sheet: Fig 4C
Figure 4 C i: Precue response rate
	Group
	HI Vehicle													HI mGlu PAM													LI Vehicle																	LI mGlu PAM
No Treatment	0.07364	0.0540706	0.0375826	0.0350576	0.0442924	0.0503188	0.0729221	0.0349983	0.038398	0.0443968		0.068877	0.0451944	0.0523544	0.0398767	0.0336111	0.0394974	0.0696146	0.045107	0.0935088	0.057903	0.032834	0.059031	0.043345	0.0311446	0.0849108	0.0216884	0.0208996	0.0243305	0.0265029	0.023026	0.0290622	0.0215991	0.00716037	0.0206323	0.0147696	0.0146335	0.0258298	0.0144464	0.0121385	0.012006	0.00974592	0.0177039	0.0168481	0.0297797	0.0246544	0.0122938	0.0275145	0.0181248
Treatment	0.0347675	0.0449081	0.0346232	0.0550143	0.0364918	0.081451	0.0290795	0.0515115	0.0445084	0.0282599	0.0456035	0.0747388	0.0305152	0.06376	0.0784566	0.0298027	0.085146	0.0380613	0.0413856	0.0674216	0.0655674	0.0482418	0.0369061	0.0116331	0.00308124	0.103809	0.0104328	0.0339526	0.0312161	0.0127577	0.0225494	0.0484592	0.0144009	0.00826203	0.0218324	0.00937945	0.0050143	0.0067446	0.00394001	0.00622569	0.0167458	0.0191227	0.0101215	0.0344069	0.0338223	0.0362988	0.0310464	0.0297454	0.0364459
											0.0439532
Figure 4 C ii: %of NG with FA
	Group
	HI Vehicle													HI mGlu PAM													LI Vehicle																	LI mGlu PAM
No Treatment	58.3333	50	48.2759	16	36	22.2222	42.8571	36	48.2759	12	15.3846	55.5556	31.25	55.5556	57.1429	28	24	50	28	42.8571	51.7241	58.6207	25	7.69231	7.14286	55	27.5862	29.6296	29.6296	43.3333	29.1667	18.5185	22.2222	0	26.6667	17.2414	22.2222	3.33333	3.44828	20.6897	6.89655	10.3448	26.6667	28.5714	57.6923	20	31.0345	16	17.2414
Treatment	36	35.7143	41.6667	28	24	47.3684	27.5862	57.6923	58.3333	13.7931	33.3333	59.0909	5.26316	50	76.9231	32.1429	68	28.5714	14.2857	53.3333	64.7059	55.5556	22.2222	13.3333	3.33333	59.0909	34.4828	48.1481	32	20	46.4286	39.2857	14.8148	3.57143	21.4286	13.3333	6.66667	10.3448	0	27.5862	10.7143	17.8571	18.5185	44.8276	56	29.1667	29.6296	15.3846	17.8571
Figure 4 C ii: %of Go trials
	Group
	HI Vehicle													HI mGlu PAM													LI Vehicle																	LI mGlu PAM
No Treatment	100	100	100	100	100	100	100	100	100	100	100	100	100	95.8333	95.6522	100	100	100	100	100	100	96.2963	96.1538	100	100	100	100	100	100	96.2963	88.8889	100	85.1852	85.7143	100	96.5517	100	100	96.6667	100	100	96.5517	100	100	95.4545	100	100	92.5926	100
Treatment	84.6154	96.1538	96	100	96.2963	100	100	100	88.4615	96	100	100	100	100	100	100	100	83.3333	100	87.5	96.2963	100	73.913	96.2963	100	94.1176	100	100	100	100	100	100	79.3103	72.4138	100	100	96.5517	100	90	100	100	100	96.5517	100	100	100	100	100	100
[truncated: 5 more columns]
