# Supplementary material for: Dissociation of impulsive traits by subthalamic metabotropic glutamate receptor 4
Source: eLife. 2022 Jan 4;11:e62123. doi: 10.7554/eLife.62123 (PMC8803315; doi:10.7554/eLife.62123)
Supplement: Figure 5—figure supplement 2—source data 1. [file elife-62123-fig5-figsupp2-data1.xlsx]

## Sheet: Fig 5 fig suppl 2Ai
Light onset (s)	Up			Down
-7	0.0229496	-0.118223	-0.401371	0.0870229	-0.0305048	-0.187219	-0.0366199	0.0308452	0.116646	-0.144291	-0.0645749
-6.75	-0.0200963	-0.0976988	-0.368185	0.0984733	-0.0279808	-0.270906	-0.0796156	-0.0449356	0.221871	-0.180802	0.0584291
-6.5	0.0400306	-0.0789869	-0.302249	0.0734282	0.0596336	-0.267978	-0.0974549	-0.17857	0.232698	-0.180798	0.118601
-6.25	0.146548	-0.0821309	-0.279095	0.0356997	0.137671	-0.181837	-0.051528	-0.251979	0.179493	-0.180798	0.103726
-6	0.217005	-0.0390201	-0.28884	-0.00327166	0.150799	-0.0796667	0.00782784	-0.202203	0.140832	-0.203489	0.0807424
-5.75	0.192047	-0.0117836	-0.26053	-0.00385183	0.124498	-0.0112645	0.0808004	-0.0977576	0.184627	-0.178012	0.0422543
-5.5	0.0578152	-0.0117292	-0.204125	-0.0118493	0.139613	-0.000936726	0.126205	-0.0331875	0.23208	-0.105452	0.0153973
-5.25	-0.0577033	-0.0519077	-0.199438	-0.0268645	0.176077	-0.0112685	0.0910996	-0.00535972	0.192274	-0.0324252	0.00765277
-5	-0.0971524	-0.116259	-0.300331	-0.0207585	0.16408	-0.0371589	0.0629542	0.0618706	0.0753655	-0.0381754	0.0102373
-4.75	-0.0885424	-0.233836	-0.424662	-0.00233017	0.116805	-0.0900024	0.0565093	0.098072	0.0352577	-0.0858863	-0.000173424
-4.5	-0.00987134	-0.296776	-0.440129	0.00151545	0.0602201	-0.0846239	0.072097	0.0233018	0.0725922	-0.127345	0.029215
-4.25	0.0867977	-0.221154	-0.334666	0.00733234	0.00372536	-0.0295961	0.0234301	-0.0450838	0.0842449	-0.180798	0.115133
-4	0.0960165	-0.106776	-0.259633	0.0145843	-0.0551108	0.0257055	-0.0356446	-0.0566838	0.0736596	-0.248074	0.185386
-3.75	0.0169445	-0.0670137	-0.288799	-0.00563855	-0.0820519	-0.00631911	-0.0365395	-0.0667322	0.121778	-0.295615	0.168279
-3.5	-0.068023	-0.0892558	-0.362184	-0.0513657	-0.0217864	-0.0504189	-0.011424	-0.0761092	0.212444	-0.278839	0.10755
-3.25	-0.0981435	-0.102903	-0.384881	-0.0598871	0.061027	-0.0399357	-0.0247293	-0.0809924	0.213028	-0.220265	0.0701238
-3	-0.0475463	-0.0878618	-0.347827	0.0210716	0.0752025	0.0147813	-0.106407	-0.102107	0.0962226	-0.164018	0.0666391
-2.75	0.015176	-0.0790608	-0.330778	0.0736641	0.0059621	0.0757761	-0.193943	-0.133284	-0.0556654	-0.155949	0.0710119
-2.5	-0.0620906	-0.115581	-0.35833	0.0239226	-0.0478261	0.114015	-0.20734	-0.0979093	-0.111786	-0.133427	0.124353
-2.25	-0.20456	-0.157701	-0.355724	-0.0299491	-0.00974449	0.209215	-0.151723	0.0407526	-0.079213	-0.0492092	0.239741
-2	-0.226069	-0.169066	-0.298656	0.0342712	0.0798325	0.269781	-0.0823679	0.137796	-0.0163054	0.0764718	0.300769
-1.75	-0.168825	-0.134219	-0.20067	0.111999	0.15082	0.229723	-0.0551434	0.142535	0.0236645	0.177469	0.2319
-1.5	-0.123164	-0.0865417	-0.11999	0.112171	0.146049	0.130637	-0.0733259	0.090525	0.0387397	0.177469	0.115688
-1.25	-0.127902	-0.0868977	-0.087003	0.000758512	0.123699	0.0312393	-0.077681	0.0524936	0.0466167	0.0823836	0.047794
-1	-0.176949	-0.101657	-0.107292	-0.116745	0.140688	-0.0741328	-0.0445077	0.0358658	0.0119497	-0.0294777	-0.00125215
-0.75	-0.260491	-0.104145	-0.134672	-0.147967	0.187638	-0.157812	0.000809865	0.00721145	-0.0446438	-0.0434674	-0.018874
-0.5	-0.295874	-0.00432792	-0.136603	-0.0905748	0.23148	-0.176303	-0.0113322	-0.061708	-0.107584	0.0290969	0.0183408
-0.25	-0.253963	0.165222	-0.126427	-0.0383737	0.231407	-0.126972	-0.0957672	-0.133284	-0.129572	0.102123	0.0464081
0	-0.118836	0.313082	-0.0911964	-0.112174	0.182971	-0.0160585	-0.210437	-0.130772	-0.14325	0.0736818	0.0278234
0.25	0.0739849	0.267701	0.00280076	-0.230048	0.0847661	0.0825872	-0.261791	-0.0784767	-0.152669	-0.0156539	-0.0261982
0.5	0.199044	0.0769526	0.0832535	-0.219027	-0.0322312	0.156535	-0.212031	-0.0499598	-0.159544	-0.124389	-0.0813444
0.75	0.205794	-0.104761	0.150506	-0.105592	-0.130372	0.104754	-0.126087	-0.0692478	-0.136334	-0.214523	-0.136815
1	0.202145	-0.184106	0.196004	-0.00255522	-0.184868	-0.0955441	-0.0914122	-0.0761092	-0.0621549	-0.211567	-0.162431
1.25	0.234539	-0.157269	0.327382	0.020662	-0.224604	-0.246886	-0.111191	-0.0759647	-0.01363	-0.116481	-0.122635
1.5	0.185113	-0.140662	0.449551	-0.00801271	-0.227703	-0.265209	-0.139489	-0.0643646	-0.0709272	-0.0213956	-0.0193397
1.75	0.0377936	-0.164216	0.432138	-0.0666642	-0.171357	-0.197551	-0.183208	-0.0548466	-0.161597	0.0457065	0.0926613
2	-0.0508379	-0.21499	0.281462	-0.104939	-0.0788349	-0.108485	-0.204672	-0.0568212	-0.168722	0.107233	0.166881
2.25	-0.0103653	-0.218138	0.107587	-0.068417	0.0119706	-0.0454656	-0.144274	-0.0977647	-0.115721	0.15262	0.210319
2.5	0.0509897	-0.0654969	0.0280751	0.010559	0.10868	-0.0269826	-0.0413137	-0.0619971	-0.0489769	0.0963733	0.262344
2.75	0.0494535	0.158027	0.0163478	0.0909061	0.191569	-0.0297554	-0.00547525	0.0192416	0.0491719	-0.0353896	0.283557
3	0.0181031	0.262638	-0.0222261	0.113606	0.185794	-0.0399278	-0.00406731	0.035732	0.174899	-0.0880523	0.212505
3.25	-0.0265443	0.216554	-0.0645545	0.0511942	0.0800669	-0.100175	-0.00655132	-0.0288489	0.241429	-0.021404	0.0272743
3.5	-0.0376117	0.148103	-0.0356162	-0.0759879	-0.0458243	-0.181841	0.0250918	-0.0475959	0.21566	0.0685724	-0.135479
3.75	-0.0364602	0.139738	0.011059	-0.115092	-0.109593	-0.179072	0.11194	0.00049104	0.10643	0.0291011	-0.173799
4	-0.0309189	0.142022	0.0693247	-0.0375799	-0.112092	-0.0844606	0.229074	0.0543308	-0.00729699	-0.105622	-0.110542
4.25	-0.0320916	0.121708	0.102349	0.0835222	-0.0765718	-0.0166469	0.186697	0.0880165	-0.00248784	-0.169144	-0.0116707
4.5	-0.039694	0.0833392	0.104207	0.179019	-0.0203228	-0.0140374	0.0470088	0.0526417	0.117044	-0.166812	0.0844983
4.75	-0.0438861	-0.0101853	0.0496735	0.16685	0.0307186	-0.0584148	0.0268598	-0.0667357	0.218287	-0.147242	0.153856
5	-0.030402	-0.167746	0.0435214	0.0904632	0.0434225	-0.113279	0.0888648	-0.156918	0.141077	-0.169768	0.193947
5.25	0.0173028	-0.258866	0.0729921	0.0322509	-0.0202443	-0.150253	0.0399318	-0.17103	-0.0192857	-0.197743	0.218996
5.5	0.0141937	-0.242635	0.0478231	0.0375003	-0.138717	-0.103107	-0.0447852	-0.161794	-0.0525404	-0.197577	0.180908
5.75	-0.0651888	-0.170097	-0.00287828	0.0146835	-0.228393	-0.0111091	-0.00664984	-0.178566	0.0757305	-0.133427	0.026749
6	-0.175435	-0.115939	-0.0240584	-0.0155484	-0.230121	0.00184006	0.123451	-0.204712	0.193255	-0.0213998	-0.142452
6.25	-0.21244	-0.0381282	-0.0428723	0.000939426	-0.17117	-0.0742882	0.187677	-0.173687	0.176643	0.0458808	-0.209351
6.5	-0.217117	0.0322153	-0.0220838	0.0631329	-0.134264	-0.103111	0.189087	-0.0835045	0.120512	-0.0184397	-0.173379
6.75	-0.202394	0.0265108	0.10361	0.107018	-0.114974	-0.0214448	0.195984	0.00721503	0.126501	-0.166982	-0.158031
7	-0.157807	-0.001538	0.184521	0.166834	-0.0867499	0.0648559	0.166827	0.0283295	0.143284	-0.222601	-0.192269
7.25	-0.0979727	-0.054188	0.151326	0.209051	-0.0540637	0.137885	0.102076	0.0164404	0.0615792	-0.166812	-0.224396
7.5	-0.0714234	-0.066533	0.0337131	0.19114	-0.0325558	0.214165	0.0658006	0.0122356	-0.0668564	-0.079966	-0.228097
7.75	-0.0836532	0.0167384	-0.0154419	0.0751307	-0.0289517	0.246348	0.0792939	0.0189525	-0.104053	-0.060867	-0.170035
8	-0.072824	0.181714	-0.0094454	-0.012634	-0.0488166	0.135431	0.0706846	0.059355	-0.0487329	-0.0829261	-0.0664984
8.25	-0.0207118	0.258224	-0.0517363	0.000753662	-0.0774805	-0.00589002	-0.0220664	0.0787875	0.0237639	-0.144121	0.00260086
8.5	0.0002382	0.203721	-0.189812	0.133379	-0.0861108	-0.107586	-0.0958635	-0.00704522	0.0116267	-0.200704	-0.0388133
8.75	0.0140662	0.193064	-0.302859	0.209542	-0.0751756	-0.14764	-0.114932	-0.164313	-0.0754257	-0.1137	-0.144566
9	0.0483811	0.280941	-0.272594	0.202131	-0.0780991	-0.121435	-0.133632	-0.249467	-0.141685	0.110193	-0.21368
9.25	0.124319	0.319109	-0.150305	0.140638	-0.104498	-0.0530284	-0.154912	-0.230717	-0.130115	0.325842	-0.226232
9.5	0.13536	0.270316	-0.0163892	0.0469341	-0.115434	-0.0480791	-0.145435	-0.150049	-0.0094329	0.381452	-0.21238
9.75	0.040442	0.200698	0.0394194	-0.0496178	-0.0906207	-0.103103	-0.0808705	-0.0809888	0.164749	0.348355	-0.202441
10	-0.130638	0.124778	0.0435963	-0.13473	-0.0658457	-0.147484	0.0185597	-0.0692442	0.276075	0.29819	-0.14273
10.25	-0.26275	-0.00270632	0.0676164	-0.159195	-0.0477398	-0.134535	0.0871817	-0.104623	0.287477	0.236668	0.0433172
10.5	-0.270611	-0.109219	0.112809	-0.148604	-0.0168644	-0.0687465	0.0803654	-0.104771	0.266092	0.102285	0.258654
10.75	-0.22666	-0.0690251	0.127719	-0.0878842	0.00986451	-0.0194197	0.05952	-0.0548466	0.236784	-0.0128723	0.285588
11	-0.203422	0.149351	0.0947579	-0.0241147	-0.024547	-0.00849562	0.033248	0.000353624	0.25456	0.085161	0.123816
11.25	-0.205067	0.389837	0.0499447	0.0463763	-0.0582827	0.00444171	-0.0449404	-0.0194718	0.283848	0.359559	-0.0453162
11.5	-0.129096	0.484005	0.0225986	0.151632	-0.0201239	0.0907384	-0.0564946	-0.019079	0.220751	0.524881	-0.141211
11.75	0.0103693	0.370229	0.0109841	0.216967	0.0613608	0.196433	-0.0304969	0.0383779	0.118664	0.431779	-0.188766
12	0.0976438	0.208028	0.0422564	0.166179	0.0864412	0.169636	-0.0733214	0.097249	0.0864	0.28403	-0.149913
12.25	0.0523115	0.0965227	0.0608924	0.0475506	0.0368674	0.0619198	-0.141179	0.107301	0.0830714	0.228756	-0.00613834
12.5	-0.072863	-0.0177439	0.0492494	0.00352723	-0.00356385	-0.000192879	-0.142681	0.0450983	0.0319702	0.200157	0.124068
12.75	-0.128847	-0.140385	-0.0273959	0.0405424	0.0175637	-0.00573067	-0.0893881	-0.0474513	-0.0174043	0.129924	0.0825693
13	-0.0644566	-0.234872	-0.141661	0.0533396	0.0271287	-0.000936726	-0.032796	-0.154258	-0.0340852	0.0545743	0.00216671
13.25	0.0234126	-0.282549	-0.222758	-0.0153525	-0.0306487	0.00998739	0.0547368	-0.245118	-0.0468824	0.00128754	0.0356933
13.5	0.0808804	-0.285465	-0.21433	-0.123364	-0.0906101	-0.013882	0.141631	-0.230861	-0.0671276	-0.0294735	0.154443
13.75	0.0745398	-0.2213	-0.100034	-0.236546	-0.0947221	-0.0400872	0.11673	-0.0903659	-0.0835859	0.00111743	0.184353
14	0.0257763	-0.119539	-0.015123	-0.334602	-0.0458385	-0.0556459	0.0263468	0.0544789	-0.0909325	0.0904573	0.0678827
14.25	-0.0753168	0.0540782	-0.0644751	-0.314704	0.00328719	-0.0872295	-0.0605745	0.142535	-0.12397	0.138805	-0.0921328
14.5	-0.142136	0.216784	-0.19411	-0.153872	0.0626013	-0.100338	-0.141085	0.180562	-0.172718	0.00936543	-0.184197
14.75	-0.134902	0.251479	-0.249088	0.0183417	0.107	-0.0639565	-0.210435	0.235759	-0.221855	-0.164197	-0.19867
15	-0.123051	0.136821	-0.229938	0.0882227	0.103805	0.0127602	-0.261697	0.254651	-0.26486	-0.236251	-0.183707

## Sheet: Fig 5 fig suppl 2Aii
Sound onset (sec)	Up		Down
-7	0.114166	0.439124	0.0559129	0.120108	-0.0884225	0.0337156	-0.189834	-0.294697	0.0932189	-0.133745	0.00692727	-0.0384771	-0.00427982	0.48037	0.0600154	-0.133367	0.216712
-6.75	0.0765511	0.500912	0.133925	0.300199	-0.0628575	0.162411	-0.0342561	-0.331703	0.0962582	-0.0194127	-0.0586781	0.0065326	0.078218	0.48674	0.128285	-0.182031	0.251226
-6.5	-0.0851003	0.511799	0.307649	0.33404	-0.0977823	0.21197	-0.0342561	-0.286878	-0.0321781	0.0701624	-0.1721	0.0536607	0.154315	0.422826	0.165698	-0.216527	0.180123
-6.25	-0.160815	0.450011	0.547226	0.244245	-0.150915	0.24402	-0.189834	-0.242492	-0.183905	0.105608	-0.234771	0.0479167	0.078218	0.372698	0.258553	-0.092013	0.145363
-6	-0.106619	0.274907	0.481374	0.111085	-0.160274	0.363137	-0.275507	-0.250323	-0.254016	0.136864	-0.261946	0.067447	0.0367167	0.340035	0.397604	0.101083	0.229021
-5.75	-0.122715	0.0271114	0.245368	0.0307798	-0.141542	0.483408	-0.129048	-0.250323	-0.252377	0.189882	-0.323691	0.157418	0.154303	0.285545	0.309562	0.149747	0.301111
-5.5	-0.260211	-0.147993	-0.022147	-0.0129335	-0.213393	0.414957	0.318925	-0.234673	-0.23704	0.253745	-0.355907	0.243477	0.228031	0.213795	0.00902566	-0.0234412	0.210628
-5.25	-0.290252	-0.209781	-0.134526	-0.0542438	-0.31081	0.232031	0.758839	-0.205948	-0.200513	0.285427	-0.301124	0.316363	0.18653	0.148922	-0.22072	-0.209238	-0.0139066
-5	-0.122726	-0.220668	0.0558891	-0.0487393	-0.35457	0.063908	0.889021	-0.124568	-0.135929	0.244762	-0.163914	0.327543	0.0869869	0.0792246	-0.227314	-0.284679	-0.180201
-4.75	0.106129	-0.220668	0.419092	0.0244623	-0.363929	-0.0656604	0.654928	-0.0567143	-0.0289782	0.153232	-0.0175635	0.274814	0.054267	0.0283472	-0.103241	-0.257892	-0.170965
-4.5	0.27318	-0.220668	0.592816	0.188925	-0.363929	-0.139661	0.397937	-0.168943	0.0597567	0.0767949	0.160072	0.215709	0.0372214	0.0222776	-0.0151899	-0.182031	-0.0369905
-4.25	0.493965	-0.15888	0.419092	0.371987	-0.31081	-0.111596	0.148628	-0.198579	0.0258136	0.0419421	0.318979	0.235414	0.0454981	0.0466105	-0.103241	-0.0920026	0.0864239
-4	0.785053	0.016224	0.150617	0.479467	-0.160274	0.0499261	-0.0347931	-0.0275501	-0.119511	0.0291046	0.35521	0.261189	0.0869869	0.0522069	-0.165657	-0.064806	0.100704
-3.75	0.860768	0.202231	0.0558891	0.511344	0.0527537	0.190172	-0.0251627	0.1578	-0.246221	0.0358816	0.197835	0.226558	0.136765	0.0122291	-0.0152087	-0.0920026	0.0676203
-3.5	0.593835	0.202231	0.0726043	0.509946	0.150171	0.152464	0.03565	0.126941	-0.284494	0.0710624	0.0398628	0.282695	0.145534	-0.0426286	0.196915	-0.092013	0.103296
-3.25	0.259235	0.016224	-0.0555298	0.468147	0.0527537	-0.00657367	-0.0950558	0.0607601	-0.237549	0.133441	-0.0226743	0.470535	0.078218	-0.0685172	0.196915	0.100653	0.245533
-3	0.114154	-0.0862045	-0.229254	0.299707	-0.150915	-0.117644	-0.284613	0.076848	-0.105483	0.199434	-0.0581845	0.640494	0.054267	-0.0329878	0.046448	0.432851	0.404762
-2.75	0.213573	0.0271114	-0.117835	0.11825	-0.301451	-0.133062	-0.2664	0.0977656	0.058618	0.229277	-0.136925	0.651504	0.0869869	0.03007	-0.0152087	0.550086	0.468069
-2.5	0.319317	0.202231	0.212922	0.108607	-0.35457	-0.11512	-0.0950558	0.105585	0.152923	0.194103	-0.276693	0.540471	0.18653	0.112453	-0.00200199	0.342403	0.4299
-2.25	0.28124	0.202231	0.435807	0.306882	-0.31081	-0.0755655	0.0265436	0.105585	0.167961	0.125534	-0.380278	0.467402	0.286566	0.217169	-0.065819	0.11523	0.346437
-2	0.0684917	0.016224	0.212922	0.64689	-0.213393	-0.0543055	-0.0433754	0.149959	0.106975	0.0775931	-0.388164	0.49829	0.277797	0.317714	-0.0970269	0.0470886	0.282976
-1.75	-0.206489	-0.147993	-0.039799	0.993174	-0.0446632	-0.0502781	-0.0864736	0.231339	0.0275926	0.0875298	-0.278963	0.515841	0.145534	0.380061	-0.00860536	-0.00885354	0.268786
-1.5	-0.373552	-0.209781	-0.022147	1.26074	0.0876785	-0.0362549	-0.0160434	0.239169	-0.016698	0.156402	-0.0574628	0.366138	-0.0540453	0.43571	0.0842592	-0.0579369	0.256992
-1.25	-0.427274	-0.220668	0.0559129	1.35872	0.168365	0.0434181	0.0174244	0.0612101	0.011773	0.230994	0.176806	0.230135	-0.195077	0.527804	0.121682	-0.0161526	0.197924
-1	-0.435322	-0.15888	-0.0555298	1.23165	0.0970383	0.0812156	-0.0433754	-0.198129	0.0840941	0.243263	0.23954	0.180231	-0.195077	0.648466	0.240543	0.0398103	0.0953857
-0.75	-0.389648	-0.0455643	-0.229254	0.929946	-0.0446632	-0.0157764	-0.068248	-0.360439	0.178589	0.206319	0.099506	0.148567	-0.11258	0.71832	0.446433	-0.064806	-0.0151286
-0.5	-0.168863	0.0889152	-0.30729	0.656564	-0.194674	-0.158791	-0.0342691	-0.412633	0.216427	0.15059	-0.134846	0.0932181	-0.00426733	0.676651	0.57851	-0.216527	-0.132501
-0.25	0.136159	0.314905	-0.323981	0.533195	-0.31081	-0.29583	0.120785	-0.420452	0.136917	0.0711033	-0.340383	0.0172069	0.0284525	0.463397	0.446433	-0.284679	-0.224162
0	0.289299	0.676016	-0.323981	0.388591	-0.301451	-0.426743	0.267768	-0.420452	-0.017895	-0.0284559	-0.39015	-0.00759751	-0.00426733	0.109737	0.20312	-0.299256	-0.216281
0.25	0.219447	0.883813	-0.323981	0.110067	-0.213393	-0.502295	0.224683	-0.376077	-0.143311	-0.160722	-0.274836	0.0231123	-0.103811	-0.267715	0.0045826	-0.299256	-0.130862
0.5	0.243139	0.614228	-0.323981	-0.0725745	-0.150901	-0.434373	-0.0342691	-0.294697	-0.24325	-0.3285	-0.103816	0.0479209	-0.203846	-0.518118	-0.165278	-0.299256	-0.0409579
0.75	0.389146	0.212476	-0.229254	-0.0601753	-0.160274	-0.24	-0.223826	-0.198118	-0.325749	-0.541502	-0.0662965	0.0063712	-0.244843	-0.592	-0.233908	-0.216527	-0.0320783
1	0.410676	0.0488861	-0.0555298	-0.0146515	-0.0540364	-0.0652921	-0.171622	-0.168943	-0.376141	-0.701464	-0.157102	-0.0777033	-0.253612	-0.575384	-0.2027	-0.0234412	-0.127124
1.25	0.235554	0.0380143	0.0559129	-0.0382412	0.15953	-0.0364095	0.0691048	-0.153743	-0.387595	-0.749815	-0.234712	-0.0974034	-0.253612	-0.544565	-0.127846	0.191112	-0.316997
1.5	0.0304026	0.016224	-0.0555298	-0.0771262	0.212663	-0.0748345	0.362023	-0.161124	-0.377934	-0.715636	-0.269173	-0.021388	-0.253612	-0.546963	-0.0283967	0.259673	-0.529435
1.75	-0.114678	0.016224	-0.229254	-0.0619673	-0.00973847	-0.0884566	0.517601	-0.153743	-0.354916	-0.617208	-0.301121	0.0646662	-0.253612	-0.553461	0.0842592	0.183813	-0.678409
2	-0.19843	0.0380143	-0.30729	-0.0322152	-0.248332	-0.0578952	0.380249	-0.161124	-0.31002	-0.465423	-0.326625	0.176152	-0.253612	-0.548574	0.247146	0.0397999	-0.727186
2.25	-0.297837	-0.0455643	-0.323981	-0.0970703	-0.34521	-0.0409103	0.0690918	-0.153743	-0.296891	-0.315964	-0.300893	0.333279	-0.253612	-0.543374	0.358391	-0.0506482	-0.637491
2.5	-0.343974	-0.15888	-0.323981	-0.261312	-0.31081	-0.118694	-0.119941	-0.116749	-0.337734	-0.253257	-0.264673	0.411448	-0.253612	-0.564522	0.366405	0.107942	-0.457733
2.75	-0.252163	-0.209781	-0.323981	-0.402722	-0.160274	-0.288066	-0.162503	-0.0723634	-0.403109	-0.279838	-0.274537	0.313583	-0.253612	-0.606837	0.159474	0.474216	-0.301686
3	-0.122715	-0.220668	-0.323981	-0.528791	-0.000365336	-0.446531	-0.241515	-0.108919	-0.394204	-0.329448	-0.360017	0.17399	-0.253612	-0.65774	-0.0596045	0.708676	-0.222568
3.25	-0.0313671	-0.15888	-0.323981	-0.649036	0.0527537	-0.518281	-0.284613	-0.250323	-0.340687	-0.367188	-0.391863	0.154459	-0.253612	-0.713512	-0.138892	0.666882	-0.185413
3.5	0.0443364	-0.0455643	-0.323981	-0.699669	0.0433806	-0.534562	-0.232409	-0.323884	-0.28847	-0.40879	-0.291747	0.261019	-0.253612	-0.72661	-0.171872	0.474205	-0.190925
3.75	0.114177	0.0271269	-0.323981	-0.600859	0.115233	-0.550325	-0.129035	-0.242504	-0.302053	-0.42142	-0.161701	0.324592	-0.253612	-0.65503	-0.171872	0.254342	-0.225156
4	0.0147699	-0.0455643	-0.323981	-0.500408	0.15953	-0.56929	-0.0433754	-0.0723634	-0.336802	-0.352758	-0.132775	0.296668	-0.253612	-0.518143	-0.158674	0.0325009	-0.243851
4.25	-0.214537	-0.15888	-0.323981	-0.496802	0.0527537	-0.567011	0.0691048	0.00901657	-0.312661	-0.203968	-0.186196	0.241315	-0.203846	-0.396963	-0.209294	-0.0506482	-0.187701
4.5	-0.327878	-0.209781	-0.323981	-0.518004	0.00844248	-0.503485	0.17299	0.0163856	-0.227285	-0.059454	-0.294617	0.198968	-0.11258	-0.359412	-0.240502	-0.00156489	-0.0870657
4.75	-0.252163	-0.220668	-0.229254	-0.520792	0.150157	-0.412331	0.215564	0.0533799	-0.156871	0.0282308	-0.364211	0.193864	0.0454981	-0.371267	-0.165278	0.0252226	-0.0622317
5	-0.0313671	-0.15888	-0.0555298	-0.545317	0.390753	-0.372564	0.276351	0.113415	-0.158737	0.0257035	-0.337676	0.148732	0.21925	-0.373758	0.015629	-0.0234412	-0.147992
5.25	0.27318	-0.0455643	0.0559129	-0.615103	0.441869	-0.401729	0.47449	0.194334	-0.213032	-0.0996291	-0.250953	0.0733524	0.336344	-0.347243	0.190312	-0.0433492	-0.260791
5.5	0.540113	0.0271269	0.0391977	-0.683042	0.37202	-0.396019	0.673167	0.29707	-0.273426	-0.262607	-0.234379	0.0231081	0.286566	-0.306372	0.27176	-0.0575174	-0.270498
5.75	0.556221	-0.0455643	0.0391977	-0.720725	0.231369	-0.318921	0.690868	0.351397	-0.320651	-0.32378	-0.251368	0.120633	0.127983	-0.261629	0.234328	-0.0920026	-0.157423
6	0.235554	-0.15888	0.262059	-0.74975	0.0964996	-0.132613	0.456789	0.13476	-0.311127	-0.211358	-0.243964	0.310798	0.0132704	-0.225131	0.128276	-0.174743	0.0183627
6.25	-0.152767	-0.209781	0.481374	-0.820976	0.0714733	0.0989458	0.199798	-0.117199	-0.211904	-0.0387865	-0.184401	0.433933	-0.0540453	-0.210061	-0.00860536	-0.257892	0.169876
6.5	-0.31983	-0.220668	0.625262	-0.911969	0.0621135	0.153587	-0.0677369	-0.211217	-0.0731356	0.0511357	-0.100601	0.452819	-0.0130487	-0.224419	-0.0530106	-0.291968	0.211547
6.75	-0.297837	-0.220668	0.498065	-0.946757	-0.00973847	-0.0223345	-0.232933	-0.294697	-0.0111831	0.0590014	-0.0542395	0.52866	0.195299	-0.262438	0.0468275	-0.299256	0.0998286
7	-0.252152	-0.0970918	0.245368	-0.951915	0.0178156	-0.220715	-0.171622	-0.376077	-0.0804022	0.0603214	-0.0571111	0.607966	0.369064	-0.308285	0.141482	-0.299256	-0.0628868
7.25	-0.305885	0.12954	-0.022147	-0.944725	0.150157	-0.302532	-0.0342561	-0.412633	-0.163718	0.0564526	-0.0619647	0.509139	0.336344	-0.371715	0.00281116	-0.299256	-0.138397
7.5	-0.2983	0.398499	-0.229254	-0.866203	0.265782	-0.344937	0.0691048	-0.376077	-0.0892522	0.0310495	-0.0104662	0.316355	0.0869869	-0.423077	-0.203079	-0.299256	-0.118966
7.75	-0.1684	0.479748	-0.30729	-0.718139	0.212649	-0.336111	0.103084	-0.294697	0.0994236	0.0100431	0.119928	0.233251	-0.145312	-0.432142	-0.258142	-0.299256	-0.0877094
8	-0.0689816	0.398499	-0.323981	-0.529387	0.0433806	-0.268116	0.0873304	-0.242492	0.233751	0.0169226	0.219631	0.272025	-0.136543	-0.433225	-0.209294	-0.257892	-0.135965
8.25	-0.130774	0.151315	-0.323981	-0.341834	-0.0790627	-0.202888	-0.0859495	-0.250323	0.22263	0.011198	0.184752	0.313583	0.0284525	-0.442495	-0.127846	-0.182031	-0.227135
8.5	-0.168863	-0.0970918	-0.229254	-0.153882	0.00844248	-0.168558	-0.232933	-0.205948	0.155661	-0.00519919	0.0763724	0.285823	0.195312	-0.449378	-0.103241	-0.133367	-0.272288
8.75	-0.0609451	-0.198894	-0.0555298	-0.0248781	0.291333	-0.193638	-0.223302	-0.0645445	0.0846462	-0.00681807	0.0153246	0.215713	0.169485	-0.441746	-0.127846	-0.182031	-0.215363
9	0.0523958	-0.220668	0.0559129	0.0286544	0.550662	-0.229753	-0.0773543	0.00901657	0.0030885	0.0089204	0.0398215	0.190909	0.0454981	-0.410706	-0.165278	-0.257892	-0.105549
9.25	0.0980697	-0.15888	0.0391977	-0.0809427	0.38875	-0.25122	0.103084	-0.0723634	-0.076652	0.0342109	0.0560767	0.204874	-0.0452764	-0.368262	-0.171872	-0.250603	-0.0342852
9.5	0.197465	0.016224	0.133925	-0.269316	0.114694	-0.290388	0.379724	-0.198129	-0.143	0.0787485	-0.00430803	0.215718	-0.0130487	-0.348313	-0.158674	-0.0993017	-0.0111255
9.75	0.364991	0.264019	0.435784	-0.353719	-0.0254183	-0.33391	0.560687	-0.198129	-0.184028	0.109331	-0.069133	0.201923	0.0957682	-0.365439	-0.209294	0.101083	-0.0088507
10	0.472458	0.377335	0.592816	-0.289504	-0.0977823	-0.360635	0.483622	-0.0645445	-0.168677	0.10863	-0.0862732	0.171213	0.0869993	-0.378026	-0.277924	0.149747	-0.0319401
10.25	0.319317	0.325808	0.419092	-0.16606	-0.204034	-0.38425	0.224657	0.0533911	-0.0820749	0.106261	-0.100601	0.185004	-0.0628142	-0.377569	-0.27133	0.0592884	-0.0590972
10.5	0.20505	0.202216	0.0558891	-0.0669159	-0.31081	-0.37515	0.0690918	0.0977656	0.0510272	0.169473	-0.161707	0.232633	-0.195077	-0.412211	-0.209294	0.0252122	-0.0445612
10.75	0.28168	0.0998026	-0.212563	-0.0297983	-0.35457	-0.258118	0.105543	0.0612101	0.143655	0.291859	-0.258354	0.291559	-0.195077	-0.477678	-0.165268	0.171193	-0.0338012
11	0.35108	-0.0346769	-0.30729	-0.0230252	-0.31081	-0.0991636	0.0514033	-0.0645445	0.123168	0.415036	-0.310993	0.318683	-0.0628142	-0.514358	-0.171872	0.328234	-0.0924626
11.25	0.227495	-0.0970918	-0.323981	-0.089301	-0.160274	0.0100784	-0.0773543	-0.242504	0.0149481	0.459744	-0.314319	0.341969	0.136765	-0.504043	-0.134449	0.43973	-0.174424
11.5	0.135684	-0.0346769	-0.323981	-0.183838	-0.000365336	0.0277866	-0.223302	-0.368258	-0.109365	0.447829	-0.284699	0.269244	0.277797	-0.492095	-0.0526217	0.391476	-0.19983
11.75	0.14638	0.0271269	-0.323981	-0.238733	0.0527537	0.00661574	-0.336294	-0.412633	-0.212712	0.432757	-0.238221	0.148393	0.277797	-0.499673	-0.0592157	0.225177	-0.142582
12	0.0443364	0.016224	-0.323981	-0.206429	0.0964996	-0.0158387	-0.275507	-0.376077	-0.270193	0.426635	-0.143782	0.11291	0.145534	-0.531517	-0.171872	0.0470886	-0.0911607
12.25	0.0519212	0.016224	-0.323981	-0.0595367	0.212649	-0.0255357	0.00830508	-0.294697	-0.27003	0.394272	-0.0466593	0.120977	-0.00427982	-0.573127	-0.196485	-0.133378	-0.0811701
12.5	0.25971	0.0380143	-0.323981	0.190419	0.222023	-0.0600424	0.371142	-0.242492	-0.261255	0.301563	-0.0724516	0.104062	-0.0540453	-0.58357	-0.0218027	-0.209238	-0.0753444
12.75	0.410676	-0.0455643	-0.323981	0.471496	-0.00973847	-0.124356	0.517601	-0.294697	-0.261195	0.185033	-0.173004	0.0479167	-0.0452639	-0.547765	0.27176	-0.092013	-0.05704
13	0.356943	-0.0970918	-0.229254	0.636309	-0.248332	-0.172443	0.362023	-0.376077	-0.283307	0.0939713	-0.257222	0.0455932	-0.11258	-0.495135	0.40902	0.101083	-0.0618369
13.25	0.213573	-0.0346769	0.0391977	0.625883	-0.34521	-0.121722	0.0873174	-0.323884	-0.303698	0.0437518	-0.246786	0.0983224	-0.203846	-0.450059	0.346605	0.191112	-0.103739
13.5	0.0147584	0.0889152	0.324365	0.503114	-0.363929	-0.0186805	-0.171622	-0.124568	-0.271425	0.0583211	-0.213896	0.168267	-0.244843	-0.414401	0.196896	0.093784	-0.135838
13.75	-0.0157344	0.191328	0.324365	0.432615	-0.363929	0.0583	-0.327187	0.105596	-0.158774	0.157405	-0.169837	0.252159	-0.253612	-0.397969	0.110265	-0.00198435	-0.113177
14	0.0985214	0.264019	0.0391977	0.393637	-0.31081	0.0799326	-0.120465	0.179146	0.0154829	0.313326	-0.166895	0.352178	-0.253612	-0.383182	0.0534215	-0.00886392	-0.077981
14.25	0.25121	0.213118	-0.212563	0.314979	-0.213393	-0.0191989	0.447682	0.186515	0.16195	0.452934	-0.157946	0.45953	-0.253612	-0.332942	0.0530514	0.0252226	-0.0846886
14.5	0.311258	0.016224	-0.30729	0.195596	-0.0977823	-0.279397	0.941238	0.239158	0.23711	0.545426	-0.117807	0.455944	-0.154081	-0.244243	0.0600248	-0.00885354	-0.120406
14.75	0.372587	-0.147993	-0.323981	0.141144	-0.00973847	-0.471459	0.810519	0.239169	0.215157	0.588044	-0.0998758	0.414054	0.0284525	-0.172888	0.015629	-0.0993017	-0.125506
15	0.389146	-0.209781	-0.323981	0.153173	0.0527537	-0.406071	0.309805	0.105585	0.140276	0.55152	-0.142295	0.359045	0.145546	-0.113606	-0.0592251	-0.092013	-0.0838934

## Sheet: Fig 5 fig suppl 2Aiii
NG sound with FA onset (s)	Down
-7	-0.263069	-0.263969	0.346387	-0.338104	-0.0685841	0.218401	0.308338	0.286371	0.228522	-0.21729	-0.101002	0.278869	-0.163042	0.0738373	0.445148	-0.0152087	-0.21284	0.147122
-6.75	-0.31971	-0.0710955	0.178605	-0.241713	0.0836601	0.0370144	0.457041	0.133951	0.615645	-0.304747	-0.109323	0.450968	0.110364	0.142218	0.527141	-0.227314	-0.243401	-0.0293362
-6.5	-0.139279	0.234368	0.0596721	-0.0916984	0.190234	0.218401	0.187862	0.0384436	0.926287	-0.279526	-0.208258	0.351208	0.312843	0.0437398	0.410048	-0.302159	-0.243401	-0.0507833
-6.25	0.234481	0.384493	0.203735	-0.0288164	0.556972	0.398011	-0.105318	0.091647	0.770976	-0.21729	-0.292364	0.141142	0.398646	-0.0841903	0.262615	-0.315346	-0.243401	0.0376947
-6	0.403855	0.249765	0.346387	-0.0718632	0.992182	0.18676	-0.150079	0.233073	0.242136	-0.113499	-0.311358	-0.00969651	0.247003	-0.150462	0.0459903	-0.315346	-0.243401	0.0662926
-5.75	0.363145	0.0548993	0.178605	-0.132559	0.817135	-0.142551	-0.151974	0.307772	-0.182173	-0.0653279	-0.319387	0.108247	0.0902752	-0.193796	-0.154081	-0.315346	-0.243401	0.010939
-5.5	0.110182	0.0706994	0.0596721	-0.175911	0.319644	-0.110911	-0.192399	0.333448	-0.336701	-0.113499	-0.327818	0.462982	0.00833536	-0.266875	-0.236074	-0.315346	-0.243401	-0.0214975
-5.25	-0.143658	0.244719	0.203735	-0.203621	0.10643	0.18676	-0.258336	0.308773	-0.286665	-0.113511	-0.339006	0.799839	-0.00560309	-0.303781	-0.154081	-0.315346	-0.243401	0.0489083
-5	-0.286112	0.37611	0.346387	-0.270749	0.106463	0.398011	-0.298762	0.248231	-0.144968	0.0300481	-0.339206	0.818803	-0.0624318	-0.266875	0.0284525	-0.240502	-0.243401	0.167992
-4.75	-0.263895	0.421922	0.321222	-0.373581	-0.0685841	0.18676	-0.272449	0.166393	0.0231937	0.12592	-0.360652	0.581326	-0.163806	-0.230331	0.245077	-0.103241	-0.243401	0.275553
-4.5	-0.102187	0.404161	0.321222	-0.432948	-0.305912	-0.142551	-0.218306	0.064795	0.0739934	-0.0260427	-0.427372	0.334091	-0.180253	-0.273313	0.310517	0.0596547	-0.243401	0.348293
-4.25	0.122657	0.344756	0.371517	-0.425602	-0.412519	-0.290476	-0.265388	0.0684171	0.100458	-0.248656	-0.499488	0.0487319	-0.160559	-0.340316	0.245077	0.108864	-0.243401	0.368425
-4	0.358824	0.300505	0.178605	-0.384747	-0.435322	-0.322116	-0.392915	0.14847	0.0876076	-0.287941	-0.527006	-0.161315	-0.172275	-0.333879	0.145521	0.134499	-0.0699595	0.277206
-3.75	0.367531	0.284217	-0.0829444	-0.341927	-0.305912	-0.322116	-0.485164	0.124849	0.0231937	-0.152785	-0.546652	-0.351598	-0.0965826	-0.236778	0.227514	0.122052	0.248121	0.133311
-3.5	0.234467	0.211747	-0.200431	-0.321444	-0.0685841	-0.322116	-0.539297	0.045297	-0.131354	-0.0260427	-0.551612	-0.531037	0.0232213	-0.126793	0.445148	0.0596547	0.452167	-0.00241031
-3.25	0.183031	0.11026	-0.225561	-0.315651	0.0836601	-0.322116	-0.546349	0.0685217	-0.209401	-0.0260427	-0.51013	-0.596025	0.0392308	-0.0902574	0.42761	-0.0900534	0.421562	-0.101348
-3	0.345529	0.040005	-0.225561	-0.299109	-0.0685841	-0.322116	-0.412176	0.12546	-0.0540897	-0.152785	-0.418993	-0.556571	-0.123531	-0.0601691	0.127983	-0.240502	0.421562	-0.100964
-2.75	0.387008	0.00647838	-0.225561	-0.252348	-0.305912	-0.322116	-0.126067	0.00508376	0.242155	-0.248656	-0.294682	-0.498143	-0.172054	0.0562538	-0.136543	-0.152469	0.482728	-0.0438617
-2.5	0.177905	0.0412613	0.202289	-0.205589	-0.412519	-0.322116	0.161966	-0.239012	0.383853	-0.113511	-0.175061	-0.333404	0.0127631	0.129704	-0.236074	0.183708	0.421562	-0.0337489
-2.25	-0.00958058	0.164798	0.986938	-0.192983	-0.435322	0.0370144	0.209038	-0.335264	0.242155	0.173608	-0.11528	-0.148881	0.154078	0.0498161	-0.253612	0.497072	0.595004	-0.053334
-2	0.0456739	0.393805	1.49028	-0.19442	-0.435322	0.695637	-0.0126532	-0.248866	0.0231743	0.300349	-0.100206	-0.017027	0.0831526	-0.0902666	-0.154081	0.40902	0.97425	-0.00429951
-1.75	0.266204	0.630153	0.986938	-0.21676	-0.435322	1.11814	-0.037477	-0.104825	0.100438	0.15679	-0.0413796	0.113721	0.00703563	-0.18092	0.0284525	0.046448	0.943689	0.173184
-1.5	0.437115	0.699154	0.202289	-0.120294	-0.435322	0.875203	0.15529	0.0361949	0.397467	-0.00131785	0.105477	0.325274	0.201327	-0.266875	0.145546	-0.214126	0.421562	0.404915
-1.25	0.376986	0.590877	-0.00755548	0.0997547	-0.305912	0.545891	0.296149	0.135424	0.47475	-0.0653399	0.291653	0.339585	0.489513	-0.340316	0.127983	-0.302159	-0.0393984	0.535317
-1	0.192507	0.403472	0.178605	0.219984	-0.0685841	0.461291	0.121926	0.121623	0.151257	-0.0966818	0.415872	0.00194686	0.612563	-0.297343	0.127983	-0.240502	-0.21284	0.421925
-0.75	0.184073	0.18767	0.346387	0.00820749	0.0836601	0.18676	-0.0393814	-0.0323483	-0.195787	-0.208887	0.437782	-0.358958	0.540332	-0.169775	0.163084	-0.103241	-0.243401	0.19541
-0.5	0.45985	-0.0966336	0.178605	-0.26924	-0.0685841	0.0370144	0.0367287	-0.23467	-0.259437	-0.161683	0.33722	-0.456831	0.330098	-0.0838106	0.0284525	-0.0151899	-0.243401	-0.0505768
-0.25	0.732368	-0.347352	0.202289	-0.361134	-0.305912	0.218401	0.0155837	-0.421725	-0.067704	0.125908	0.136577	-0.379409	0.063586	-0.169775	-0.154081	-0.103241	-0.0699595	-0.274218
0	0.603424	-0.426341	0.607901	-0.315651	-0.412519	0.398011	-0.239481	-0.514104	0.319419	0.356452	-0.109295	-0.293549	-0.111455	-0.303781	-0.236074	-0.240502	0.248121	-0.378081
0.25	0.127511	-0.349581	0.918335	-0.191129	-0.435322	0.18676	-0.412186	-0.480296	0.602814	0.244247	-0.302165	-0.372448	-0.171515	-0.363976	-0.253612	-0.302159	0.452167	-0.338355
0.5	-0.156694	-0.241437	0.582771	-0.0400984	-0.435322	-0.142551	-0.404718	-0.390494	0.552014	-0.0574086	-0.358649	-0.531037	-0.147402	-0.376851	-0.253612	-0.315346	0.248121	-0.188283
0.75	-0.142832	-0.207012	0.0596721	0.0368783	-0.435322	-0.290476	-0.345833	-0.329197	0.164872	-0.279538	-0.314134	-0.517136	-0.0258021	-0.376851	-0.253612	-0.240502	-0.0699595	-0.0440294
1	-0.0517927	-0.213094	-0.175302	-0.05127	-0.435322	0.0370144	-0.199461	-0.328691	-0.195787	-0.296344	-0.273133	-0.254115	0.167224	-0.340316	-0.253612	-0.0283967	-0.21284	-0.00148375
1.25	0.0492337	-0.194689	-0.225561	-0.181399	-0.305912	0.695637	0.0485419	-0.430932	-0.336701	-0.200473	-0.342204	0.081246	0.309787	-0.236778	-0.253612	0.346605	-0.243401	-0.0729706
1.5	0.2383	-0.0885707	-0.225561	-0.197836	-0.0685841	1.11814	0.209038	-0.558373	-0.363929	-0.208875	-0.488882	0.278879	0.331043	-0.126793	-0.253612	0.621125	-0.243401	-0.13223
1.75	0.391602	-0.00846257	-0.225561	-0.123774	0.0836601	0.695637	0.187862	-0.563358	-0.363929	-0.352435	-0.605022	0.239425	0.331676	-0.126793	-0.0545499	0.571916	-0.243401	-0.0630482
2	0.266211	-0.0461734	-0.225561	-0.0488781	-0.0685841	0.0370144	0.175653	-0.431039	-0.363929	-0.479177	-0.587603	0.220031	0.239405	-0.163707	0.310517	0.196896	-0.243401	0.0732513
2.25	-0.0518066	-0.250686	-0.0829444	-0.0309033	-0.0470939	-0.0792706	0.176059	-0.295497	-0.363929	-0.431489	-0.471677	0.358148	-0.00547832	-0.0537314	0.544704	-0.152469	-0.243401	0.134378
2.5	-0.216809	-0.507264	0.178605	0.0458442	0.579774	0.18676	0.208622	-0.187884	-0.363929	-0.21729	-0.343968	0.536818	-0.176478	0.129704	0.310517	-0.139281	-0.243401	0.112033
2.75	-0.134685	-0.716764	0.346387	0.234427	1.46553	0.398011	0.23534	-0.0996333	-0.286665	-0.0176279	-0.256699	0.469942	-0.044861	0.159801	-0.0545499	0.108864	-0.243401	0.13789
3	0.0914805	-0.768466	0.178605	0.429606	1.70285	0.18676	0.229797	-0.00022009	-0.144968	-0.0737307	-0.165474	0.245975	0.196422	0.00683413	-0.119005	0.284967	-0.243401	0.220144
3.25	0.178465	-0.680047	-0.0829444	0.50658	1.07595	-0.142551	0.114864	-0.00589229	-0.0540703	-0.209371	-0.103085	0.0831033	0.26915	-0.10785	0.0284525	0.183708	-0.243401	0.23429
3.5	0.136986	-0.523377	-0.200431	0.403856	0.235839	-0.290476	0.0952077	-0.0938539	-0.144968	-0.200485	-0.117407	-0.0235971	0.118605	-0.156899	0.145546	0.046448	-0.243401	0.209477
3.75	0.0592487	-0.44772	-0.225561	0.193575	-0.260307	-0.322116	0.103071	-0.150366	-0.286665	-0.14437	-0.180009	-0.12842	-0.105055	-0.193796	0.0284525	0.011186	-0.243401	0.144256
4	0.0131896	-0.487866	-0.225561	-0.0370759	-0.412519	-0.322116	0.0481361	-0.0693764	-0.350315	-0.21729	-0.177345	-0.20772	-0.268881	-0.266875	-0.154081	-0.103241	-0.243401	0.0839805
4.25	-0.0515265	-0.499224	-0.225561	-0.235281	-0.435322	-0.322116	0.0414701	0.0742321	-0.363929	-0.304747	-0.134024	-0.188736	-0.251804	-0.267246	-0.236074	-0.240502	-0.243401	0.0679522
4.5	-0.10246	-0.422155	-0.225561	-0.330232	-0.305912	-0.322116	0.142695	0.0520788	-0.286665	-0.279526	-0.181259	-0.042571	0.0251556	-0.163337	-0.154081	-0.152469	-0.243401	0.058419
4.75	-0.212682	-0.33193	-0.225561	-0.322886	-0.0685841	-0.322116	0.0889677	-0.113143	-0.144968	-0.264978	-0.331254	0.00234686	0.378229	-0.0838106	0.0284525	0.183708	-0.243401	-0.0233003
5	-0.420183	-0.354549	-0.225561	-0.256286	0.0836601	-0.322116	-0.11236	-0.242136	-0.0540703	-0.248644	-0.431519	-0.0239872	0.480148	-0.133239	0.145546	0.497072	-0.243401	-0.191423
5.25	-0.595968	-0.409302	-0.225561	-0.198243	-0.0685841	-0.322116	-0.218326	-0.146845	-0.144968	-0.256575	-0.397376	-0.0166468	0.399707	-0.200243	0.0284525	0.40902	-0.243401	-0.355302
5.5	-0.397721	-0.42448	-0.225561	-0.140544	-0.305912	-0.322116	-0.211254	0.0793215	-0.286665	-0.248644	-0.28408	-0.0235872	0.371812	-0.217456	-0.154081	0.046448	-0.243401	-0.468451
5.75	0.160296	-0.404195	-0.225561	-0.0440428	-0.412519	-0.322116	-0.265388	0.221497	-0.195787	-0.161199	-0.155114	-0.12842	0.370749	-0.273313	-0.236074	-0.214126	-0.243401	-0.483108
6	0.717486	-0.386745	-0.225561	0.085492	-0.435322	-0.322116	-0.272855	0.225219	0.151257	0.0216452	-0.0883002	-0.300519	0.29337	-0.340316	-0.253612	-0.227314	-0.243401	-0.429553
6.25	0.874327	-0.349075	-0.225561	0.105551	-0.435322	-0.322116	-0.0648821	0.218657	0.47475	0.12592	-0.0932676	-0.319503	0.286977	-0.370414	-0.253612	-0.103241	-0.243401	-0.33763
6.5	0.630761	-0.220828	-0.225561	0.0157452	-0.435322	-0.322116	0.209038	0.273212	0.383853	0.0693332	-0.125929	-0.253715	0.319923	-0.340316	-0.154081	-0.0151899	-0.243401	-0.164721
6.75	0.202515	-0.0230994	-0.225561	-0.0726633	-0.435322	-0.322116	0.228298	0.329933	0.00956007	0.0216333	-0.156066	-0.21466	0.120453	-0.273313	0.127983	-0.103241	-0.243401	0.0812658
7	-0.161274	0.127657	-0.225561	-0.119954	-0.435322	-0.322116	0.0151678	0.224073	-0.259437	0.0945536	-0.216388	-0.267625	-0.156282	-0.157261	0.42761	-0.165657	-0.243401	0.254618
7.25	-0.415049	0.218374	-0.225561	-0.140318	-0.435322	-0.322116	-0.258346	-0.00395734	-0.350315	0.0698168	-0.277628	-0.319493	-0.293128	-0.0297011	0.626672	-0.0152087	-0.243401	0.177478
7.5	-0.591087	0.226922	-0.225561	-0.210851	-0.435322	-0.322116	-0.445144	-0.195891	-0.363929	-0.0658115	-0.293498	-0.372458	-0.251663	0.0927981	0.791643	0.196915	-0.243401	-0.178991
7.75	-0.609256	0.167985	-0.225561	-0.366238	-0.435322	-0.322116	-0.492226	-0.301451	-0.363929	-0.200485	-0.239481	-0.293959	-0.154162	0.0867218	0.943837	0.196915	-0.243401	-0.49663
8	-0.527132	0.0981742	-0.225561	-0.485082	-0.435322	-0.322116	-0.352895	-0.349959	-0.363929	-0.287929	-0.178212	-0.102486	-0.0923864	-0.0537222	0.926274	-0.0283967	-0.243401	-0.580642
8.25	-0.392552	0.00119154	-0.225561	-0.498109	-0.305912	-0.322116	-0.144912	-0.323715	-0.363929	-0.39172	-0.152737	-0.0235773	-0.0766217	-0.223903	0.791643	-0.152469	-0.243401	-0.434355
8.5	-0.370564	-0.13748	-0.225561	-0.409168	0.0608252	-0.322116	-0.0719237	-0.255814	-0.363929	-0.48758	-0.153961	-0.181776	-0.0853605	-0.297343	0.679311	-0.0900534	-0.243401	-0.187826
8.75	-0.37467	-0.229027	-0.225561	-0.287822	0.450398	-0.322116	-0.166087	-0.277972	-0.363929	-0.526865	-0.139624	-0.333414	-0.0587813	-0.266875	0.527116	0.134499	-0.243401	0.0292938
9	-0.3465	-0.230686	-0.225561	-0.211493	0.450398	-0.322116	-0.164588	-0.358769	-0.363929	-0.439892	-0.0955887	-0.279659	-0.01458	-0.193796	0.509579	0.320969	-0.243401	0.03954
9.25	-0.167729	-0.216302	-0.225561	-0.204152	0.0608252	-0.322116	-0.0385698	-0.393728	-0.286665	-0.21729	-0.0449849	-0.21426	0.0148488	-0.0967043	0.57978	0.434656	-0.243401	-0.126121
9.5	0.105048	-0.216518	-0.0829444	-0.181396	-0.28311	-0.322116	0.128592	-0.251557	-0.144968	-0.0176279	-0.00309678	-0.22162	-0.0325618	0.013281	0.310517	0.334157	-0.243401	-0.258302
9.75	0.248055	-0.186392	0.178605	-0.168451	-0.412519	-0.142551	0.128988	0.0418974	0.0231937	-0.0737307	0.00728883	-0.149291	-0.0010606	0.0261654	-0.0545499	0.134499	-0.243401	-0.252004
10	0.12293	-0.0931211	0.346387	-0.20176	-0.435322	0.366326	0.0410743	0.250215	0.0739934	-0.161683	0.029905	0.0297679	0.293865	-0.133239	-0.0194744	-0.0768655	-0.243401	-0.190154
10.25	-0.0423449	0.056834	0.178605	-0.254324	-0.435322	0.906888	0.0956035	0.226581	0.0231937	-0.0176519	0.110314	0.0487517	0.84766	-0.260808	0.410048	-0.165657	-0.243401	-0.23399
10.5	-0.0648281	0.200006	-0.0829444	-0.142631	-0.435322	0.906888	0.256109	0.102117	-0.131354	0.182022	0.217179	-0.109837	1.34798	-0.223903	0.826768	-0.0900534	-0.0699595	-0.31818
10.75	-0.00113946	0.319255	-0.200431	0.0667827	-0.305912	0.366326	0.27537	-0.0349666	-0.209401	0.109102	0.251397	-0.200769	1.38266	-0.0902574	0.709675	-0.0151899	0.248121	-0.340325
11	-0.0466452	0.413143	-0.0829444	0.0870502	-0.0685841	-0.110911	0.168602	-0.148602	-0.131354	-0.121914	0.206485	-0.0959361	0.97066	-0.0232542	0.227514	-0.103241	0.452167	-0.272644
11.25	-0.296113	0.392989	0.178605	-0.150166	0.213069	-0.290476	0.0555835	-0.148604	0.0231937	-0.223436	0.119898	0.0487517	0.470797	-0.0902574	-0.119005	-0.165657	0.248121	-0.227954
11.5	-0.591094	0.21652	0.346387	-0.375139	0.427563	-0.322116	0.0622394	0.0278768	0.228522	-0.256575	0.0764346	0.141151	0.0973225	-0.23034	-0.236074	-0.0900534	0.103482	-0.188066
11.75	-0.710296	0.0146489	0.178605	-0.419169	0.579807	-0.322116	0.121926	0.297596	0.538381	-0.248644	0.0437172	0.146615	-0.0864441	-0.333879	-0.253612	-0.0151899	0.278682	-0.136304
12	-0.706456	-0.095746	-0.0829444	-0.388572	0.4732	-0.322116	0.0956236	0.516486	0.707326	-0.208887	-0.0232757	0.115617	-0.187151	-0.333879	-0.253612	-0.103241	0.452167	-0.104233
12.25	-0.729479	-0.168892	-0.200431	-0.306563	0.0608252	-0.322116	-0.0648821	0.548422	0.538381	-0.161187	-0.104407	-0.0955361	-0.207734	-0.273313	-0.253612	-0.240502	0.248121	-0.125544
12.5	-0.840268	-0.160444	-0.225561	-0.20601	-0.28311	0.0370144	-0.15239	0.359899	0.3194	-0.152785	-0.143286	-0.300919	-0.129292	-0.230331	-0.253612	-0.302159	-0.0699595	-0.141488
12.75	-0.955918	-0.0711606	-0.225561	-0.160792	-0.412519	0.875203	-0.0507687	0.0584501	0.346648	-0.21729	-0.137136	-0.272708	-0.0702216	-0.236778	-0.253612	-0.315346	-0.21284	-0.123495
13	-1.01472	0.00180273	-0.225561	-0.265374	-0.305912	1.62702	0.00852196	-0.141261	0.474731	-0.287929	-0.138861	0.0224077	-0.0853571	-0.236778	-0.253612	-0.240502	-0.243401	-0.099599
13.25	-0.978954	-0.0471731	-0.225561	-0.37381	0.0608252	1.41576	-0.119005	-0.153479	0.538381	-0.344032	-0.175925	0.330747	-0.165249	-0.114288	-0.253612	-0.103241	-0.243401	-0.0824087
13.5	-0.74897	-0.160771	-0.225561	-0.33209	0.450398	0.545891	-0.25169	-0.0812014	0.474731	-0.304747	-0.233847	0.385599	-0.189759	0.0373021	-0.253612	0.0596547	-0.243401	0.00831074
13.75	-0.341892	-0.173761	-0.225561	-0.183248	0.450398	-0.0792706	-0.305418	-0.0609537	0.255769	-0.200473	-0.25091	0.0812262	-0.0830218	0.099245	-0.253612	0.108864	-0.0699595	0.207079
14	-0.0804509	-0.137587	-0.225561	-0.010531	0.0608252	-0.290476	-0.2917	-0.0550697	-0.0540897	-0.161187	-0.24337	-0.0638517	0.0387264	-0.0232634	-0.253612	0.0596547	0.421562	0.341439
14.25	0.0489674	-0.1173	-0.0829444	0.25798	-0.28311	-0.322116	-0.312469	-0.07601	-0.273051	-0.169602	-0.273807	0.0904635	0.0698613	-0.163707	-0.253612	-0.0900534	1.11713	0.254633
14.5	0.105041	-0.146304	0.178605	0.519412	-0.412519	-0.322116	-0.345833	-0.132932	-0.350315	-0.105097	-0.334441	0.127651	0.0362396	-0.174483	-0.154081	-0.165657	1.43521	0.0675336
14.75	0.0914805	-0.137076	0.346387	0.529039	-0.435322	-0.322116	-0.33173	-0.167888	-0.286665	0.0300481	-0.364626	-0.00501335	0.010293	-0.169775	0.0284525	-0.0900534	1.11713	-0.0441813
15	-0.0515265	-0.118669	0.178605	0.193157	-0.435322	-0.322116	-0.279501	-0.162796	-0.144968	0.204478	-0.382563	-0.0425809	-0.051614	-0.193796	0.145546	0.0596547	0.452123	-0.0569202

## Sheet: Fig 5 fig suppl 2Aiv
Reward onset (s)	Up				Down
-7	-0.142403	-0.090536	0.0129433	0.160683	-0.321303	-0.199184	-0.0483959	-0.0297847	-0.193604	-0.0574271	0.127789	-0.0504133	-0.151635	-0.175028	-0.025572	-0.00414445	-0.0301982	-0.0939364	-0.114996	-0.407941	0.031133	0.0182525	-0.0800402	-0.305575	-0.0580408	-0.209137	0.214094	0.167105	0.362964	-0.0255419	0.219533	0.190625	0.0436366	0.179401	0.136399
-6.75	-0.209689	-0.163108	-0.02534	0.13224	-0.247696	-0.00574272	-0.0187075	-0.127038	-0.205011	0.00273145	0.151492	-0.0465456	-0.188456	-0.113368	0.0467247	0.108388	0.0227993	0.112835	-0.171944	-0.396785	0.18063	0.0414618	-0.100085	-0.276413	0.00633812	-0.139214	0.25587	0.266217	0.362899	-0.0735085	0.366339	0.257763	0.141065	0.210442	0.0313248
-6.5	-0.200761	-0.241758	-0.134143	0.0852031	-0.114569	0.0777509	0.00303712	-0.203658	-0.226803	-0.00254191	0.17784	-0.0596482	-0.256273	-0.0847509	0.064153	0.143916	0.057602	0.330653	-0.206072	-0.353383	0.323013	0.062535	-0.116788	-0.20487	0.0705252	-0.0272804	0.354141	0.253885	0.343689	-0.0299089	0.365968	0.291655	0.121606	0.203238	-0.148393
-6.25	-0.193037	-0.266884	-0.124169	0.00410788	0.158869	0.0560612	-0.000236521	-0.217375	-0.132705	-0.0521538	0.200173	-0.152564	-0.331391	-0.113368	0.00142677	0.0656163	-0.0162667	0.333911	-0.190391	-0.32554	0.308004	0.0423491	-0.0882221	-0.137519	0.0786123	0.0798653	0.413234	0.195913	0.326915	-0.0252687	0.286488	0.234389	0.0066246	0.111756	-0.330593
-6	-0.133731	-0.211217	0.0645537	-0.0723533	0.424588	-0.0019452	-0.0720835	-0.157807	-0.0140356	-0.0275071	0.260464	-0.262912	-0.373897	-0.141706	-0.124672	-0.0642269	-0.0910616	0.273635	-0.136358	-0.258717	0.222012	0.0230391	-0.0348261	-0.182048	0.00891132	0.0993914	0.356366	0.167105	0.304548	-0.140003	0.238844	0.169934	-0.14599	-0.0339984	-0.416566
-5.75	0.00555281	-0.155547	0.276879	-0.0833261	0.403211	-0.0451352	-0.149379	-0.0552509	-0.0320167	0.147399	0.317593	-0.312755	-0.384435	-0.136707	-0.230697	-0.147913	-0.167002	0.482751	-0.0834882	-0.0811761	0.178067	0.0382877	-0.0197385	-0.255365	-0.0967115	-0.00720554	0.275849	0.125972	0.245283	-0.205526	0.159373	0.230153	-0.213434	-0.188084	-0.360291
-5.5	0.162193	-0.180674	0.338477	-0.0149678	0.162708	0.0157214	-0.142666	0.0314215	-0.140311	0.327587	0.309236	-0.258573	-0.370648	-0.0800462	-0.227849	-0.166528	-0.229056	0.729605	-0.0663624	0.168502	0.255497	0.0437683	-0.0289063	-0.312068	-0.162273	-0.0813997	0.243888	0.0968095	0.17523	-0.130736	0.0365836	0.364323	-0.149925	-0.198843	-0.231748
-5.25	0.208617	-0.224853	0.224967	0.0424902	-0.0753881	0.203538	-0.118476	0.0780586	-0.0502382	0.34696	0.244442	-0.138342	-0.344061	0.0422044	-0.147757	-0.196252	-0.248618	0.785504	-0.0772967	0.262521	0.301878	0.0217612	-0.0252663	-0.319628	-0.124978	-0.0300726	0.125988	0.0848315	0.142872	-0.00360548	-0.0110697	0.41222	0.00268991	-0.0891743	-0.140215
-5	0.127941	-0.220684	0.0978429	0.0383809	-0.162816	0.320516	-0.145589	0.0833365	0.267013	0.321995	0.139768	-0.0379701	-0.308105	0.170809	-0.121897	-0.254479	-0.295918	0.527683	-0.101382	0.183822	0.170433	0.025657	-0.0467855	-0.237262	0.0101223	0.0532477	0.0548813	0.0680098	0.150186	0.0399809	-0.0300104	0.338183	0.121606	0.0127492	-0.102977
-4.75	0.0276138	-0.207162	0.0179232	-0.00296941	-0.166846	0.206115	-0.237408	0.0750275	0.493534	0.332853	0.0702086	-0.0251186	-0.274683	0.16581	-0.210077	-0.316326	-0.307596	0.274668	-0.118806	0.0304159	0.00461234	0.0446539	-0.10762	-0.096215	0.113004	0.0496005	0.0508294	-0.0492425	0.179015	0.0706447	-0.0239376	0.211479	0.200186	0.0147845	-0.03158
-4.5	-0.0870507	-0.240277	-0.0439553	-0.00865276	-0.187765	0.00666875	-0.298027	0.027152	0.420994	0.277975	0.0713221	-0.0431542	-0.205793	0.0705346	-0.320068	-0.32918	-0.193912	0.229807	-0.105514	-0.0410633	-0.0821695	0.0452463	-0.179115	-0.0876825	0.0855358	-0.0331621	0.0748674	-0.148701	0.226318	0.123772	0.0430176	0.129291	0.192758	-0.00552572	0.113775
-4.25	-0.154587	-0.278373	-0.0489493	0.0563971	-0.26355	-0.135315	-0.25352	-0.0609385	0.205666	0.112191	0.108375	-0.0144896	-0.103995	0.0435526	-0.352785	-0.308116	-0.00102126	0.348209	-0.0622851	0.0262458	-0.140161	-0.0228697	-0.223212	-0.177472	-0.0186063	-0.0774674	0.0949725	-0.0722436	0.291729	0.106489	0.146505	0.104777	0.118508	0.0186414	0.255524
-4	-0.158798	-0.308797	0.00794923	0.179181	-0.286099	-0.147282	-0.133818	-0.0954137	0.0301164	0.0129747	0.10266	0.0612113	-0.0119377	0.0571872	-0.328478	-0.289821	0.0980848	0.417159	-0.011078	0.14066	-0.215325	0.0226184	-0.199206	-0.231755	-0.0507375	-0.0606127	0.177585	0.0848402	0.344088	-0.0608458	0.159382	0.0984352	0.0252354	0.0462348	0.272899
-3.75	-0.0366667	-0.349464	0.0129433	0.289032	-0.123113	-0.0821125	-0.0173826	-0.00557965	-0.08935	0.0132782	0.0182895	0.0954388	0.000617198	0.0755336	-0.29123	-0.292947	0.0742511	0.353072	0.0466466	0.15622	-0.222978	0.274862	-0.102315	-0.252796	0.0115961	-0.0439489	0.309866	0.125981	0.333404	-0.126635	0.0730976	0.0963454	-0.019646	0.0218715	0.19965
-3.5	0.153515	-0.33404	-0.0822386	0.339047	0.123525	-0.050795	0.0450958	0.123604	-0.132705	0.0273856	-0.0992548	0.0643662	-0.031368	0.0621862	-0.234004	-0.285572	0.0401076	0.205517	0.0843584	0.0694144	-0.0967719	0.485318	0.00930856	-0.264277	0.0927474	-0.0196891	0.436889	-0.0204341	0.283175	-0.00335201	0.0430176	0.10764	0.014494	-0.00348211	0.112024
-3.25	0.238407	-0.249743	-0.157458	0.32634	0.241772	-0.0722039	0.0488727	0.147122	-0.136287	0.00273145	-0.170318	0.0177912	-0.0434178	0.000239618	-0.169255	-0.296299	-0.0123492	0.136853	0.0961627	-0.0171569	0.0476174	0.41342	0.0660074	-0.232547	0.144937	-0.0486522	0.528707	-0.177509	0.240123	0.159089	0.0988516	0.118361	0.0543836	0.0171217	0.0607515
-3	0.0817675	-0.165127	-0.147477	0.279762	0.210936	-0.12754	-0.0117524	0.0699635	-0.1327	-0.0820813	-0.178399	0.0315828	-0.0390046	-0.0614197	-0.113832	-0.333086	0.019182	0.169552	0.109372	-0.0449934	0.14136	0.225027	0.0500213	-0.0897358	0.147431	-0.165852	0.54683	-0.241288	0.184981	0.184388	0.067034	0.108655	0.0738474	0.0728832	0.024977
-2.75	-0.057786	-0.18461	-0.138843	0.191248	0.182344	-0.175538	-0.0795791	0.0159319	-0.165461	-0.172175	-0.138842	0.0631935	-0.0413751	-0.0700553	-0.0546981	-0.356218	0.159126	0.250936	0.190556	0.00651548	0.281871	0.185978	0.0472025	0.094	0.0928126	-0.239813	0.486656	-0.183671	0.0900141	0.202402	-0.0239376	0.0808199	-0.0194195	0.139347	-0.113327
-2.5	0.0189358	-0.245924	-0.157451	0.0638424	0.264284	-0.210859	-0.0713386	0.0761187	-0.193823	-0.172175	-0.0608108	0.0689288	-0.0264732	-0.0330895	0.0153046	-0.268876	0.309112	0.348488	0.323177	0.0849746	0.484406	0.312862	0.106873	0.197141	0.00247498	-0.208496	0.399051	-0.0554044	0.019204	0.291093	-0.0905408	0.0333294	-0.154086	0.161249	-0.287794
-2.25	0.196438	-0.253252	-0.185761	-0.0527414	0.400398	-0.146096	-0.0437928	0.192318	-0.244352	-0.0820813	0.0695084	0.0468797	-0.0164123	0.132194	0.0771268	-0.117692	0.237665	0.293362	0.439111	0.164326	0.608067	0.565036	0.218518	0.151637	-0.0730208	-0.0737291	0.361728	0.0268776	0.0464733	0.320785	-0.0303807	-0.0350751	-0.164612	0.167814	-0.317547
-2	0.220801	-0.199723	-0.190748	-0.10957	0.457565	0.0730259	-0.106541	0.311193	-0.262552	-0.00254191	0.23678	0.0708969	0.00483007	0.364703	0.165975	0.061423	0.159253	0.0720069	0.518479	0.278722	0.463133	0.850355	0.299738	-0.0206218	-0.0932443	0.0494662	0.365811	-0.0554044	0.118259	0.211942	0.152939	-0.119416	-0.0643065	0.243819	-0.20728
-1.75	0.136612	-0.157575	-0.180766	-0.0785921	0.411774	0.291679	-0.213401	0.458509	-0.179647	0.0273856	0.34704	0.155726	0.0812024	0.435005	0.292296	0.264891	0.215668	-0.0242405	0.597298	0.381093	0.153952	0.970192	0.338877	-0.179113	0.00984258	0.0611784	0.41009	-0.183671	0.156515	-0.00361868	0.329454	-0.210767	0.0213119	0.252653	-0.109285
-1.5	0.0740375	-0.157691	-0.21905	-0.00941947	0.287577	0.363498	-0.256987	0.581535	-0.0142543	0.032659	0.361736	0.244888	0.190236	0.302757	0.37914	0.43183	0.273304	0.159832	0.683829	0.342999	-0.0721223	0.861952	0.328007	-0.220414	0.23219	0.0297179	0.422038	-0.206318	0.179424	-0.0737751	0.353462	-0.2381	0.0173716	0.179182	-0.0356481
-1.25	0.136606	-0.144178	-0.242652	0.0582728	0.138803	0.32159	-0.250493	0.634908	0.137166	0.032659	0.32449	0.237934	0.20521	0.14717	0.390999	0.498266	0.209338	0.371481	0.710996	0.0849687	-0.10374	0.6565	0.233055	-0.208927	0.469325	0.0300487	0.32549	-0.119538	0.318136	0.132772	0.305438	-0.146125	-0.019646	0.246924	0.135342
-1	0.335459	0.0264007	-0.129156	0.0830141	0.0731108	0.247197	-0.265514	0.671683	0.212251	0.032659	0.277322	0.100104	0.0668306	0.0905093	0.371124	0.441472	0.129784	0.311212	0.639206	-0.135975	-0.0537777	0.59988	0.0393299	-0.227688	0.5648	0.00401584	0.186521	0.0207069	0.60551	0.452542	0.219894	0.0240808	-0.0603718	0.486437	0.332747
-0.75	0.534062	0.423148	0.083169	0.115327	0.112068	0.175547	-0.302812	0.653021	0.245226	0.032659	0.158652	-0.0667397	-0.0682918	0.0905164	0.324515	0.30767	0.165947	0.0395804	0.454322	-0.181941	-0.0702404	0.686022	-0.13301	-0.260081	0.4476	-0.106755	0.129355	0.0848402	0.817185	0.579932	0.20196	0.144001	-0.105259	0.64257	0.32483
-0.5	0.626659	0.885584	0.343177	0.226523	0.255136	0.0909995	-0.361985	0.344471	0.227458	0.032659	-0.0784265	-0.167028	-0.120734	0.0805255	0.180823	0.105619	0.177452	-0.17532	0.207166	-0.219244	-0.205816	0.779853	-0.259483	-0.231888	0.110143	-0.27028	0.0996968	0.0207069	0.684591	0.461543	0.256408	0.104988	-0.15386	0.482054	0.0919047
-0.25	0.707072	1.21346	0.484203	0.388224	0.375507	0.072116	-0.474908	-0.249467	0.137161	0.0625866	-0.368637	-0.215997	-0.18058	0.0805255	-0.074805	-0.153546	0.0948177	-0.295292	-0.0509384	-0.254541	-0.290489	0.629175	-0.375619	-0.20473	-0.367977	-0.404953	0.0434831	-0.113376	0.247176	0.250882	0.365968	-0.0582321	-0.190872	0.232639	-0.216254
0	0.838638	1.34924	0.438359	0.447609	0.376293	0.0396718	-0.636838	-0.739947	0.0402833	0.0875443	-0.620479	-0.258035	-0.335262	0.0905164	-0.340861	-0.379691	0.002051	-0.360411	-0.291932	-0.277973	-0.26298	0.332979	-0.48972	-0.227685	-0.801007	-0.502806	-0.0631919	-0.21248	-0.202611	0.124756	0.372772	-0.250834	-0.217142	0.0946322	-0.322147
0.25	0.885075	1.28194	0.14504	0.368176	0.153785	-0.0373596	-0.777056	-0.940655	-0.0497953	0.0379399	-0.814877	-0.243892	-0.48014	0.0238652	-0.531622	-0.515168	-0.105289	-0.355554	-0.512621	-0.254541	-0.304648	0.113875	-0.594348	-0.333115	-1.05593	-0.567266	-0.191257	-0.24745	-0.502705	-0.00335201	0.183019	-0.41063	-0.221077	0.047638	-0.180645
0.5	0.76243	0.92137	-0.0961539	0.279205	-0.127797	-0.168383	-0.869011	-0.960203	-0.150468	-0.11729	-0.895603	-0.194163	-0.488673	-0.108376	-0.620667	-0.577728	-0.278436	-0.2823	-0.645917	-0.191408	-0.449876	-0.0324135	-0.639521	-0.468921	-1.13625	-0.580219	-0.213464	-0.218641	-0.687872	-0.130996	-0.0175128	-0.551196	-0.190872	0.070066	0.0329839
0.75	0.563827	0.425708	-0.000699207	0.214679	-0.265269	-0.34656	-0.924055	-0.900444	-0.262339	-0.256988	-0.805958	-0.205598	-0.346159	-0.217	-0.594984	-0.619749	-0.374639	-0.199324	-0.627828	-0.0925602	-0.526757	-0.155262	-0.632577	-0.546814	-1.07779	-0.549622	-0.135033	-0.119538	-0.782371	-0.226922	-0.0905408	-0.632816	-0.180125	0.0659046	0.185722
1	0.429261	0.127867	0.248577	0.165247	-0.254279	-0.435983	-0.954013	-0.826559	-0.305694	-0.281642	-0.647379	-0.273084	-0.137322	-0.221991	-0.486524	-0.626762	-0.318742	-0.144199	-0.476556	-0.0294272	-0.381826	-0.151499	-0.572658	-0.549237	-0.893759	-0.510299	-0.0214093	-0.0142634	-0.770701	-0.236456	0.0920383	-0.613767	-0.194806	0.000382985	0.198034
1.25	0.344381	0.0848638	0.371774	0.116232	-0.191352	-0.426248	-0.973988	-0.773387	-0.236964	-0.207376	-0.553627	-0.30618	0.0589227	-0.108376	-0.367715	-0.597966	-0.228875	-0.126077	-0.293683	-0.0491576	-0.116873	-0.0398843	-0.485757	-0.498881	-0.645161	-0.52028	0.112323	0.0207069	-0.673551	-0.161666	0.377469	-0.495549	-0.239472	-0.129345	0.149105
1.5	0.263712	0.168392	0.266891	0.0415984	-0.108406	-0.404936	-0.967432	-0.72942	-0.100751	-0.0873547	-0.520781	-0.263779	0.183372	0.0188733	-0.313529	-0.563203	-0.211389	-0.0242267	-0.151323	-0.159395	0.0620913	0.0721341	-0.402302	-0.40951	-0.434482	-0.533382	0.24498	-0.0204341	-0.586362	-0.0781289	0.52529	-0.355038	-0.217369	-0.195504	0.0940228
1.75	0.196426	0.21109	0.131139	-0.0635636	-0.0747429	-0.434587	-0.93946	-0.691539	0.0468686	-0.0324695	-0.466357	-0.143666	0.231999	0.0805326	-0.299495	-0.51876	-0.243461	0.223366	-0.0493717	-0.30188	0.0425169	0.121752	-0.35712	-0.296663	-0.322085	-0.486746	0.309733	-0.0722348	-0.550427	-0.0654795	0.316938	-0.259578	-0.090577	-0.129345	0.0299442
2	0.136863	0.179764	0.0512124	-0.200951	-0.143824	-0.485311	-0.921872	-0.676797	0.137166	-0.0873547	-0.379976	0.0494621	0.256994	0.108856	-0.297411	-0.501907	-0.187923	0.554987	0.00366589	-0.293779	-0.0515226	0.105811	-0.377867	-0.191099	-0.289736	-0.403066	0.322489	-0.148346	-0.523181	-0.0564723	0.0426473	-0.220838	0.0252522	-0.034403	-0.0467629
2.25	0.120217	0.271807	0.0545726	-0.31392	-0.276547	-0.436457	-0.915756	-0.685773	0.111792	-0.202103	-0.26988	0.241179	0.24484	0.189141	-0.266431	-0.516439	-0.0740534	0.698224	0.0123051	-0.124339	-0.132516	0.0473399	-0.402803	-0.0993029	-0.272985	-0.338933	0.348335	-0.218641	-0.468122	-0.051572	-0.0647959	-0.19603	-0.0272889	-0.0329971	-0.100855
2.5	0.16218	0.504605	0.126439	-0.355641	-0.289094	-0.279349	-0.885	-0.649409	0.0364829	-0.256988	-0.161403	0.355605	0.168352	0.312747	-0.161017	-0.477788	-0.0300033	0.54526	0.0330316	0.0262636	-0.186399	0.0208006	-0.38806	-0.0505781	-0.21313	-0.299896	0.269677	-0.177509	-0.390161	-0.0564723	-0.103409	-0.136625	-0.154086	-0.0475152	-0.0778851
2.75	0.259251	0.623267	0.09315	-0.297756	-0.0908786	-0.148023	-0.83653	-0.564663	-0.0282271	-0.23203	-0.060528	0.287815	0.063066	0.354712	0.0340252	-0.290445	-0.0804016	0.357915	0.0977391	-0.0335974	-0.12654	0.0449816	-0.329568	-0.0782551	-0.124424	-0.29722	0.112825	-0.0204341	-0.336593	-0.0345491	-0.0668946	-0.0417604	-0.164612	0.0204601	-0.00186772
3	0.289292	0.557345	-0.0822386	-0.213004	0.184276	-0.122338	-0.793226	-0.485587	-0.0893446	-0.202095	-0.00306884	0.126441	0.0601836	0.274426	0.23001	-0.0176149	-0.0507604	0.280083	0.163559	-0.144315	0.0457572	0.0910853	-0.274444	-0.149662	-0.0167719	-0.316681	0.0149542	0.230892	-0.316129	0.00102813	0.0494606	0.0598583	-0.019646	0.0916766	0.0302034
3.25	0.136869	0.504363	-0.204376	-0.203078	0.303251	-0.237829	-0.748495	-0.458612	-0.154273	-0.207376	0.0239749	0.0369378	0.169029	0.123838	0.312342	0.145352	0.0958271	0.23795	0.192161	-0.151055	0.204459	0.0986647	-0.269528	-0.190448	0.0809747	-0.305634	-0.000795827	0.382151	-0.301861	-0.0299089	0.109991	0.122722	0.125547	0.0186496	-0.0390047
3.5	-0.0828464	0.539623	-0.209076	-0.290574	0.247571	-0.334513	-0.686888	-0.462186	-0.183448	-0.177448	0.0500936	0.0286931	0.298816	0.113553	0.275031	0.142645	0.191024	0.159839	0.219601	-0.159389	0.288294	0.14374	-0.243678	-0.241319	0.170779	-0.231236	-0.0165525	0.406107	-0.279618	-0.113706	0.0430267	0.0797535	0.110865	-0.177238	-0.186782
3.75	-0.150133	0.563539	-0.185753	-0.393586	0.220267	-0.277593	-0.612219	-0.433235	-0.107331	-0.0820813	0.0527658	0.00228446	0.423092	0.354705	0.209935	0.120953	0.139222	0.0493007	0.275247	-0.215314	0.309238	0.232265	-0.204733	-0.236883	0.256994	-0.189703	-0.0103803	0.324171	-0.29006	-0.148025	-0.0969747	-0.0459219	-0.0459165	-0.275627	-0.321096
4	-0.0825833	0.544493	-0.21905	-0.411256	0.274097	-0.107517	-0.527273	-0.353423	-0.0178414	0.0273856	0.00209764	-0.0426162	0.501432	0.596932	0.203676	0.183538	-0.0649876	-0.0288108	0.351395	-0.211144	0.175673	0.274802	-0.17932	-0.124418	0.262117	-0.21627	0.070408	0.237054	-0.336506	-0.135369	-0.200453	-0.123927	-0.168547	-0.213324	-0.362716
4.25	-0.0110864	0.443524	-0.242652	-0.331584	0.260777	-0.00879325	-0.442932	-0.243693	0.0111197	0.0822709	-0.0653532	-0.0536565	0.51712	0.453632	0.262082	0.24928	-0.289937	-0.0563737	0.40258	-0.107886	-0.017496	0.183044	-0.144977	0.0459372	0.111476	-0.236973	0.14462	0.103326	-0.369487	-0.0564723	-0.200453	-0.0798759	-0.183002	-0.10034	-0.306483
4.5	-0.0242254	0.232039	-0.214063	-0.266177	0.215332	-0.06267	-0.341697	-0.117086	-0.0104593	0.0379399	-0.0734857	-0.0553527	0.503287	0.14189	0.320468	0.191328	-0.327339	-0.0336675	0.406082	0.0137355	-0.0697169	0.0297847	-0.0249637	0.133015	-0.0769394	-0.218054	0.170632	-0.0146268	-0.357729	0.0446145	-0.103409	0.0173149	-0.113134	-0.00400329	-0.257908
4.75	-0.0530555	0.06909	-0.185753	-0.301455	0.24031	-0.122452	-0.214635	0.0421885	0.0288767	-0.0873622	-0.00688358	-0.0237269	0.467085	-0.00813007	0.306576	0.0676711	-0.196816	-0.0106818	0.391476	0.132313	0.0135835	-0.0247159	0.15609	0.141787	-0.139758	-0.141303	0.262317	-0.00811027	-0.325542	0.0972147	0.00651275	0.0625982	-0.00495863	0.100585	-0.217584
5	-0.0870507	0.0787895	-0.21905	-0.376761	0.262324	-0.0486644	-0.117848	0.228337	0.123199	-0.172175	0.0623032	0.0514423	0.388021	0.0102305	0.213083	-0.0332004	-0.0505699	-0.0288039	0.349413	0.164566	0.147152	0.00838455	0.29074	0.133666	-0.0724108	-0.0143726	0.399834	0.10298	-0.318208	0.0446145	0.0430267	0.0659432	0.118508	0.15041	-0.109216
5.25	-0.0619839	0.21097	-0.270954	-0.385643	0.215473	0.0897198	-0.10166	0.375107	0.115598	-0.161621	0.0639022	0.120717	0.257445	0.108856	0.127496	-0.0785248	-0.0596489	-0.0109682	0.269927	0.0694144	0.170576	0.0149474	0.351037	0.0873708	0.000879597	0.10245	0.421265	0.142803	-0.348561	-0.0518387	6.9666e-05	0.0302944	0.203279	0.0657963	0.0244238
5.5	0.0144812	0.312172	-0.265967	-0.322616	0.173076	0.218162	-0.150772	0.410018	-0.0142597	-0.122563	-1.72016e-05	0.119387	0.154333	0.207775	0.0922798	-0.134593	-0.127047	0.122556	0.179804	-0.0491694	0.117384	-0.0618915	0.387996	0.0135378	0.0546668	0.0895731	0.354005	0.0968182	-0.401736	-0.130736	-0.0540176	-0.0241238	0.271344	-0.0526779	0.0336948
5.75	0.0353437	0.33909	-0.21905	-0.248203	0.158776	0.328173	-0.190601	0.360775	-0.0857683	-0.0574271	-0.105352	0.090178	0.108228	0.237461	0.0744471	-0.198263	-0.0939741	0.27524	0.0824431	-0.0800499	0.0533989	-0.211298	0.415746	-0.0134806	0.117522	0.0421295	0.299332	-0.0430806	-0.440865	-0.178956	-0.133489	-0.0762235	0.200633	-0.127415	0.000460223
6	-0.0617272	0.368144	-0.185753	-0.235694	0.108417	0.380663	-0.168025	0.27309	0.0149093	-0.0271961	-0.232351	0.108539	0.0978362	0.099152	0.0381268	-0.21102	-0.0185112	0.246359	-0.0507158	-0.115993	-0.0224499	-0.366186	0.448996	-0.0528712	0.161745	0.0746305	0.231574	-0.183671	-0.445832	-0.209893	-0.133859	-0.112757	-0.00125038	-0.16951	0.0388974
6.25	-0.184372	0.486798	-0.21905	-0.279101	0.128035	0.305583	-0.0858785	0.165049	0.262993	-0.0873547	-0.319018	0.158425	0.121606	-0.0517161	-0.00894828	-0.159763	0.0133789	0.131996	-0.137315	-0.187472	-0.0149476	-0.423911	0.418993	-0.0987874	0.123154	0.201371	0.20451	-0.241288	-0.431613	-0.214526	-0.0300104	-0.147786	-0.138347	-0.24295	0.110604
6.5	-0.230545	0.705725	-0.270954	-0.311407	0.24127	0.172826	0.0212407	0.109504	0.511291	-0.172175	-0.293608	0.231267	0.205798	-0.150061	-0.0554927	-0.116061	0.0133745	0.0038883	-0.113981	-0.23064	0.0552627	-0.351786	0.28297	-0.0669243	0.0550927	0.240131	0.236298	-0.253612	-0.402597	-0.178956	0.0494698	-0.189666	-0.149925	-0.301385	0.134836
6.75	-0.205222	0.832172	-0.265967	-0.273863	0.394502	0.158957	0.132766	0.146504	0.57622	-0.202103	-0.188791	0.303598	0.345019	-0.226983	-0.088067	-0.134931	0.0370266	-0.139342	-0.0238243	-0.183302	0.0935586	-0.247887	0.125351	0.110053	0.051742	0.0442607	0.23158	-0.253612	-0.357467	-0.140003	0.0730976	-0.223982	-0.0789882	-0.294076	0.107262
7	-0.16772	0.728829	-0.134143	-0.212325	0.457373	0.183619	0.218299	0.255122	0.375078	-0.136967	-0.103929	0.349005	0.464735	-0.193661	-0.0838206	-0.194585	0.069094	-0.189897	0.067338	-0.0491635	0.0331507	-0.24976	0.0339526	0.262198	0.107123	-0.191266	0.191113	-0.253612	-0.315662	-0.109066	0.140062	-0.239467	-0.0312292	-0.20827	0.0627191
7.25	-0.0873011	0.435413	0.083169	-0.183736	0.405132	0.16802	0.308521	0.362258	0.0402779	-0.0676779	-0.0921473	0.327542	0.498383	-0.0847509	-0.0279523	-0.220903	0.0834986	-0.0936569	0.152296	0.0613142	-0.0533828	-0.270372	-0.0162043	0.224675	0.147458	-0.233363	0.175489	-0.218641	-0.318723	-0.0781355	0.208773	-0.233598	0.00268991	-0.13695	-0.00416117
7.5	-0.015297	0.155842	0.229968	-0.164351	0.225348	0.115023	0.390394	0.40348	-0.207801	0.00770885	-0.106027	0.288984	0.444806	-0.0564136	0.0732966	-0.15356	0.121551	0.0266083	0.201615	0.0262577	-0.118745	-0.220284	-0.0567061	0.0825123	0.127942	-0.111346	0.176133	-0.154508	-0.359528	-0.0654795	0.067034	-0.190686	0.025241	-0.0804797	-0.0572263
7.75	-0.0110864	0.0427156	0.191678	-0.114523	0.0531429	0.0381867	0.431303	0.389793	-0.24735	0.0523358	-0.0765775	0.22513	0.312456	-0.146697	0.164654	-0.0350911	0.203171	0.0120244	0.181457	-0.167741	-0.0969186	-0.154038	-0.108019	0.018905	0.0943349	-0.0232571	0.108372	-0.0434264	-0.39406	-0.0734953	-0.097345	-0.108295	0.0397019	-0.0348214	-0.0456458
8	-0.0915117	0.0457996	0.0645537	-0.0491975	-0.00131079	-0.0503263	0.413672	0.395912	-0.100757	0.122449	-0.0334822	0.113873	0.20059	-0.193661	0.209912	0.0364165	0.293866	-0.0709507	0.146578	-0.317446	-0.0946184	-0.142626	-0.135154	0.0298702	0.0882683	-0.051163	0.0457043	0.0786695	-0.392318	-0.135369	-0.120621	-0.0570566	0.0515116	0.0279709	-0.00244388
8.25	-0.154587	0.0367722	-0.0339813	-0.0229961	0.0117807	-0.0923256	0.362645	0.431712	0.133366	0.207558	-0.0382736	0.0562923	0.186789	-0.160045	0.198117	0.0383842	0.287877	-0.097202	0.125111	-0.340872	-0.169377	-0.191852	-0.103599	0.0734677	0.137905	-0.109779	0.0820779	0.195922	-0.373745	-0.161933	-0.0969655	-0.0484679	0.0213063	0.0620395	0.0151918
8.5	-0.108164	-0.105966	-0.0772516	-0.035955	0.0196467	-0.0520897	0.300523	0.438354	0.263218	0.262147	-0.0923792	0.040402	0.227906	-0.170029	0.174564	0.0236016	0.156704	-0.148783	0.110189	-0.32554	-0.307211	-0.264164	-0.00202362	0.110189	0.24393	-0.13777	0.159736	0.225076	-0.366117	-0.126095	-0.103409	-0.0586809	-0.019646	0.0805024	-0.0376115
8.75	0.00555916	-0.18251	-0.0722575	-0.107268	0.0222707	-0.00537048	0.234223	0.377017	0.233819	0.272694	-0.133561	0.00776483	0.217538	-0.226983	0.153195	0.0199889	-0.0269354	-0.167184	0.0686325	-0.282383	-0.323971	-0.271191	0.0969952	0.094	0.355067	-0.0970576	0.204652	0.189751	-0.367547	-0.135363	-0.103409	-0.0515763	-0.0380415	0.0173466	-0.0547585
9	0.0949064	-0.0498773	-0.10056	-0.218108	-0.0148865	-0.0372607	0.152697	0.276965	0.184097	0.26214	-0.128295	-0.0234244	0.140032	-0.221991	0.120299	-0.00402443	-0.114722	-0.0888002	0.00724735	-0.171912	-0.217584	-0.194212	0.105342	0.0554973	0.403178	-0.0205021	0.188889	0.167105	-0.376729	-0.214526	-0.0905316	-0.0308486	-0.0419762	-0.128156	0.0354605
9.25	0.0475219	0.181917	-0.162445	-0.259492	-0.0296064	-0.154135	0.0885013	0.190989	0.170135	0.242766	-0.109154	-0.0718607	0.0686572	-0.108376	0.0593284	-0.0667661	-0.0649876	0.0444509	-0.032172	-0.0408114	-0.063573	-0.150324	0.016786	-0.0211408	0.337938	0.0278711	0.231302	0.160943	-0.390952	-0.284416	-0.0668946	-0.0052643	-0.0643065	-0.180582	0.148137
9.5	-0.0277383	0.26621	-0.129156	-0.185227	-0.0632316	-0.26239	0.0669535	0.15703	0.115592	0.128026	-0.100617	-0.148005	0.0615449	-0.00945689	-0.00446494	-0.141545	0.0195454	0.127419	-0.0204936	-0.0572638	0.0401114	-0.242547	-0.110562	-0.0890773	0.187693	0.00396764	0.307641	0.125972	-0.391306	-0.310713	0.0365836	0.0159109	-0.127589	-0.12548	0.191129
9.75	-0.0572725	0.143268	0.0362515	-0.06669	-0.0537862	-0.24109	0.0725045	0.216616	0.0580511	-0.0873622	-0.0741261	-0.209151	0.0927096	-0.0280834	-0.0470856	-0.200102	-0.0100958	0.117699	0.00637082	-0.163805	0.0381119	-0.363341	-0.195026	-0.227416	0.047954	-0.140012	0.292257	0.0268688	-0.363911	-0.262753	0.23241	0.0154532	-0.217142	-0.104092	0.150484
10	-0.0155538	-0.0324224	0.196672	0.00889466	0.00678436	-0.107418	0.0968418	0.337842	0.0328958	-0.251714	-0.0515075	-0.260965	0.0876681	-0.170036	-0.0749207	-0.183326	-0.114714	0.0817272	0.034833	-0.22647	-0.0268622	-0.366188	-0.207174	-0.333534	-0.0183097	-0.319891	0.181797	-0.113376	-0.32491	-0.1663	0.316948	0.0058618	-0.235764	-0.159079	0.09838
10.25	0.0949001	-0.159061	0.224974	0.0587992	0.0878983	-0.0101819	0.18501	0.402958	0.0834252	-0.221787	-0.0384065	-0.312935	0.0285494	-0.245617	-0.106343	-0.122569	-0.205236	-0.0058251	0.0294339	-0.159635	-0.0879546	-0.299802	-0.18966	-0.342034	-0.0126378	-0.414077	0.209095	-0.21248	-0.285291	-0.0781289	0.26249	-0.00159133	-0.15386	-0.160605	0.0680192
10.5	0.225005	-0.214723	0.116458	0.113782	0.0283099	-0.0812991	0.338356	0.367157	0.172909	0.0221048	-0.00951814	-0.323282	-0.0284471	-0.193374	-0.140949	-0.0914257	-0.202323	-0.111779	0.00500484	0.0179056	-0.067154	-0.2657	-0.189439	-0.333248	0.0364449	-0.398591	0.359639	-0.21248	-0.241078	-0.0654795	0.116416	-0.0132675	-0.0643009	-0.0711298	0.106934
10.75	0.3861	-0.224736	-0.0106661	0.188751	-0.149169	-0.153963	0.445891	0.270495	0.223663	0.352241	0.0356754	-0.258034	-0.0456529	-0.136699	-0.163127	-0.113878	-0.152593	-0.084223	-0.00464644	0.179892	-0.116734	-0.275902	-0.166566	-0.33811	0.0929963	-0.367318	0.432304	-0.154508	-0.207017	-0.0301755	-0.0175037	-0.0616016	-0.0459109	0.0204711	0.225776
11	0.458104	-0.211214	-0.100567	0.294403	-0.241292	-0.0904658	0.472043	0.190751	0.166335	0.462011	0.0826506	-0.173776	-0.0540743	-0.175028	-0.132659	-0.110103	-0.126865	0.0949926	0.0289021	0.184062	-0.186539	-0.265447	-0.0964769	-0.273987	0.107055	-0.330772	0.436882	-0.113367	-0.201419	0.0492482	-0.127055	-0.154152	-0.0275209	0.0109222	0.364173
11.25	0.360783	-0.209189	-0.124162	0.39536	-0.219609	0.076084	0.440364	0.131139	0.0430574	0.262147	0.123127	-0.140246	-0.105608	-0.170323	-0.0500706	-0.0588617	-0.120703	0.242821	0.0942036	0.0652384	-0.210085	-0.194282	0.013031	-0.126182	0.0952085	-0.226649	0.457499	-0.119538	-0.193149	0.149808	-0.206887	-0.215021	0.118502	-0.00552572	0.395295
11.5	0.191958	-0.182821	-0.105554	0.457835	-0.194933	0.185291	0.363347	0.0912478	0.0299031	-0.0468879	0.142297	-0.156628	-0.18175	-0.079759	0.00296576	0.00795363	-0.155674	0.140685	0.167707	0.00650955	-0.16752	-0.0850437	0.0805324	0.0086897	0.131818	-0.0566632	0.475623	-0.119538	-0.154825	0.246255	-0.236967	-0.171399	0.256047	0.0225037	0.320031
11.75	0.0695765	-0.111494	-0.0489422	0.480503	-0.217567	0.0892436	0.239392	0.100571	0.0508823	-0.216514	0.131245	-0.14703	-0.18504	-0.0564136	-0.0335711	0.0384787	-0.202323	-0.0566532	0.193103	0.0304219	-0.0557846	-0.04142	0.0966999	0.155554	0.246526	0.0681037	0.39683	-0.107205	-0.1344	0.308129	-0.243401	-0.0359023	0.245079	-0.0123878	0.172987
12	-0.0230206	-0.0824281	0.00794923	0.460824	-0.262734	-0.115391	0.145048	0.152922	0.0758243	-0.196829	0.0886402	-0.10588	-0.087151	-0.175028	-0.106794	0.0321545	-0.141455	-0.102073	0.155057	0.045748	0.0135908	-0.056359	0.102048	0.342371	0.385106	0.049761	0.265318	-0.0845674	-0.18387	0.255529	-0.243401	0.0883804	0.0845833	-0.144268	0.0153218
12.25	-0.163259	-0.11769	0.0312645	0.418863	-0.277761	-0.268875	0.169784	0.208556	0.0940187	-0.117282	0.0354856	-0.0496839	0.0111917	-0.273947	-0.131995	0.00192641	0.0485274	-0.0106818	0.0972088	-0.00576083	0.0694361	-0.0816671	0.0997848	0.459418	0.452174	-0.0441601	0.117814	-0.0204341	-0.272886	0.176098	-0.206887	0.141625	-0.012003	-0.261219	-0.0278082
12.5	-0.281436	-0.054157	0.0645537	0.37609	-0.23803	-0.272876	0.262785	0.22747	0.0976113	-0.0873547	0.0176326	-0.0447815	0.0432993	-0.24533	-0.105324	-0.0372863	0.191861	0.0541712	0.0837658	-0.0605536	0.129585	-0.0742592	0.0671185	0.431741	0.441566	-0.124354	0.0416175	0.0330395	-0.321808	0.180999	-0.139923	0.102298	0.0554407	-0.260696	0.0611777
12.75	-0.32761	0.0979639	0.088156	0.320125	-0.205495	-0.19545	0.335809	0.221777	0.0582698	-0.062708	0.0322403	-0.105312	0.00366993	-0.113368	-0.0341288	-0.0487309	0.138386	-0.047965	0.107681	-0.120169	0.286829	-0.0666815	0.0325546	0.319545	0.379297	-0.19463	0.0727651	0.0145362	-0.312398	0.185646	-0.0969655	0.035658	0.147877	-0.191938	0.191447
13	-0.311215	0.156907	0.0412455	0.239598	-0.128935	-0.216043	0.351107	0.190627	0.00730848	0.032659	0.0830001	-0.165384	-0.0153978	0.0188733	0.0712664	0.0248583	-0.0125265	-0.162328	0.111994	-0.179126	0.424148	-0.019762	0.0435063	0.186445	0.296761	-0.239993	0.206877	0.0145362	-0.264539	0.0446145	-0.0668946	-0.00839924	0.1148	-0.0822984	0.229819
13.25	-0.239467	0.08569	-0.0772516	0.176447	7.21934e-05	-0.30829	0.353838	0.152399	0.0402833	0.122753	0.154836	-0.167601	0.00622431	0.0522024	0.168028	0.140965	-0.175417	-0.217181	0.0592956	-0.277973	0.383571	0.104922	0.0839315	0.0394407	0.230281	-0.261574	0.343109	0.0392014	-0.200883	-0.131002	0.0365836	-0.0201574	-0.0235862	0.0257366	0.148063
13.5	-0.112618	-0.0133702	-0.129156	0.150346	0.15075	-0.332547	0.349998	0.107487	0.0940241	0.112198	0.254872	-0.118275	0.0243251	0.000239618	0.199815	0.194264	-0.293018	-0.22231	-0.0119219	-0.325786	0.142184	0.216889	0.0919827	-0.126189	0.187743	-0.228757	0.423493	-0.0204341	-0.154343	-0.200625	0.195896	-0.0356236	-0.0606038	0.065799	0.025199
13.75	-0.019758	-0.11095	-0.0389683	0.138553	0.264361	-0.317616	0.349942	0.0499784	0.076043	0.0925141	0.302222	-0.00900439	0.0264574	-0.0330895	0.168571	0.142935	-0.304337	-0.199331	-0.0288851	-0.183308	-0.0491281	0.264532	0.059233	-0.206787	0.163552	-0.191425	0.441743	-0.0845674	-0.13547	-0.205252	0.249983	-0.0516685	0.0107857	0.0642739	-0.104208
14	-0.0364036	-0.155789	0.083169	0.102699	0.292542	-0.304759	0.368625	-0.0113935	-0.0104593	0.122745	0.228301	0.115011	0.0304512	0.0102305	0.128518	0.0893049	-0.237294	-0.171762	0.00819072	0.0613142	-0.0524049	0.29295	0.0508027	-0.158578	0.170405	-0.155969	0.414814	-0.101043	-0.101151	-0.161933	0.256047	-0.0430541	0.0213119	0.0767428	-0.196488
14.25	-0.137942	-0.0885141	0.116465	0.0630822	0.304576	-0.266291	0.401533	-0.0914118	-0.050014	0.122753	0.0633417	0.182505	0.0363217	-0.00446499	0.12691	0.15505	-0.12995	-0.194468	0.0779702	0.184068	-0.0751979	0.377959	0.0956275	-0.0458626	0.183247	-0.103552	0.327986	-0.154508	-0.014132	-0.0654795	0.262851	0.0399844	-0.0498512	0.186904	-0.180681
14.5	-0.209689	-0.0132451	0.00794923	0.117679	0.244996	-0.19908	0.468642	-0.0788965	-0.00285308	0.00273145	-0.0798966	0.183411	0.025842	-0.056708	0.168763	0.272065	-0.00410669	-0.254737	0.166811	0.0808045	-0.170072	0.491496	0.187233	-0.00736692	0.136009	-0.0914054	0.171406	-0.218641	0.086715	0.0582619	0.195896	0.144397	-0.0566636	0.301732	-0.0774311
14.75	-0.226078	-0.0485043	-0.100854	0.249256	0.07766	-0.177677	0.545514	0.0220507	0.00753261	-0.172175	-0.109988	0.154651	-0.0284592	-0.0280976	0.196671	0.322234	0.0166416	-0.24988	0.259075	-0.0883961	-0.224691	0.478907	0.261479	-0.0231838	0.0345067	-0.168541	0.0236294	-0.24745	0.173946	0.0835674	0.0430176	0.199281	0.00291075	0.329215	0.0222371
15	-0.21415	-0.115665	-0.100567	0.367075	-0.0218244	-0.156101	0.548416	0.153558	-0.0500086	-0.251714	-0.0158028	0.118014	-0.110697	0.0571943	0.197676	0.256775	-0.106298	-0.166905	0.292642	-0.194458	-0.268077	0.368021	0.291577	-0.0619262	-0.090676	-0.281845	0.0282179	-0.253612	0.244266	0.127878	-0.0604607	0.209933	0.0883027	0.234384	0.103802

## Sheet: Fig 5 fig suppl 2Bi
Precue poke onset (sec)	Up			Down
-7	-0.241888	0.134109	-0.135862	0.212769	0.0729705	0.197914	0.0461986	-0.024341	-0.00890128	0.265125	0.00124031	-0.244598	0.189377	0.238599	0.138641	0.331598	-0.0979883	-0.205446	0.161261	0.0242062	0.236422	-0.132707	-0.136359	-0.0844303	0.493148	-0.0860498	0.0977496
-6.75	-0.274075	0.0668358	-0.225444	0.156511	0.0518485	0.217266	0.0293641	0.132819	-0.0201955	0.370469	0.0851836	-0.1906	0.285262	0.3486	0.342118	0.254208	-0.166925	-0.264248	0.10393	0.00687869	0.229652	-0.153302	-0.0418597	-0.0589981	0.526174	-0.0904039	0.210004
-6.5	-0.231677	0.00595423	-0.272276	0.14115	0.0262814	0.239962	0.0578353	0.172429	-0.0359962	0.388566	0.195382	-0.137247	0.332934	0.398152	0.4667	0.199511	-0.0812899	-0.267225	0.0309656	-0.0461652	0.211312	-0.173579	0.0322598	-0.020477	0.583933	-0.11223	0.24528
-6.25	-0.139397	-0.0384114	-0.291935	0.181617	0.0352667	0.293138	0.125445	0.0433374	-0.0159542	0.330064	0.259851	-0.0972522	0.336752	0.447399	0.425762	0.203529	0.101252	-0.216533	0.00317194	-0.105806	0.173855	-0.18341	0.0476992	0.0170436	0.600931	-0.164596	0.122933
-6	-0.100577	-0.0348359	-0.265041	0.198625	0.0483417	0.337255	0.26134	-0.0187583	0.0681198	0.237923	0.295455	-0.0742639	0.319747	0.471763	0.330267	0.232968	0.309002	-0.158092	0.0319587	-0.117557	0.181831	-0.18039	-0.0468076	0.0341337	0.528415	-0.217221	-0.0286925
-5.75	-0.101675	-0.0011969	-0.189843	0.137088	0.0443849	0.330445	0.405201	0.105075	0.175912	0.152057	0.310252	-0.0720776	0.288282	0.429171	0.279549	0.266763	0.489323	-0.152887	0.0522941	-0.0682577	0.216486	-0.168251	-0.161169	0.0349323	0.435935	-0.238788	-0.12263
-5.5	-0.10958	0.0429681	-0.0923373	0.118366	0.0371525	0.300736	0.498911	0.291249	0.229492	0.094508	0.245753	-0.0542664	0.217528	0.321056	0.293244	0.2995	0.514217	-0.173476	0.0214078	0.0159607	0.18826	-0.164128	-0.210184	0.0698286	0.365325	-0.217221	-0.161119
-5.25	-0.130071	0.0563098	-0.0142938	0.224527	0.038136	0.296024	0.535346	0.284039	0.198852	0.0808672	0.121194	-0.080086	0.107187	0.209539	0.284713	0.312925	0.269045	-0.178682	-0.0509687	0.105572	0.086628	-0.161648	-0.220668	0.146381	0.27634	-0.169209	-0.137855
-5	-0.209636	0.0835524	0.0420598	0.35652	0.0470564	0.314279	0.561461	0.211688	0.126996	0.0971365	0.0157319	-0.114427	0.0131331	0.0986552	0.172577	0.281694	-0.0313246	-0.188527	-0.10299	0.170803	-0.00255208	-0.137508	-0.220668	0.245965	0.163218	-0.0860498	-0.0536275
-4.75	-0.317943	0.198561	0.101891	0.366672	0.0696079	0.35787	0.586535	0.122881	0.0623849	0.103621	-0.0286087	-0.125262	-0.0240814	-0.0148215	0.0443935	0.207242	-0.201202	-0.173319	-0.107698	0.211483	-0.0524983	-0.107927	-0.190919	0.324915	0.0967732	-0.0208249	-0.00664582
-4.5	-0.384276	0.394959	0.168626	0.291318	0.122115	0.454406	0.582077	0.0093275	0.0563512	0.0727064	-0.0332239	-0.125431	-0.0165878	-0.109641	0.0203192	0.121596	-0.266323	-0.106725	-0.0808303	0.24925	-0.0855843	-0.105273	-0.106609	0.373982	0.08641	0.0451214	-0.0369107
-4.25	-0.393928	0.500417	0.210236	0.21463	0.181601	0.542222	0.574134	-0.0857539	0.110857	0.0368201	-0.0312338	-0.117254	-0.0340017	-0.154148	0.0537562	0.0729003	-0.273154	-0.0128696	-0.0441944	0.300492	-0.125915	-0.138282	-0.0170502	0.398599	0.0895848	0.11034	-0.0929752
-4	-0.330586	0.374667	0.212356	0.203583	0.224801	0.520614	0.56926	-0.147491	0.14423	0.059359	-0.0513504	-0.0602609	-0.104576	-0.169949	0.0563485	0.0881159	-0.254626	0.0256763	-0.0143672	0.335606	-0.147525	-0.138648	0.0126998	0.400691	0.0756945	0.193505	-0.10876
-3.75	-0.234035	0.164922	0.203671	0.212358	0.245324	0.384685	0.506375	-0.187101	0.094412	0.156602	-0.0565274	-0.0289151	-0.184346	-0.142212	0.0549992	0.130546	-0.157581	0.0196327	-0.00800692	0.313572	-0.115342	-0.123944	-0.0222997	0.376615	0.0654359	0.250743	-0.0864248
-3.5	-0.173052	0.0333975	0.196237	0.229606	0.214505	0.220928	0.358942	-0.159365	0.012927	0.230829	-0.0268885	-0.0972522	-0.207614	-0.0773056	0.0309222	0.167897	-0.000799929	0.0177394	-0.00930912	0.270745	-0.0473598	-0.138781	-0.00686773	0.364252	0.0592437	0.263078	-0.0878064
-3.25	-0.183269	-0.0479718	0.201625	0.313064	0.154479	0.114571	0.201561	-0.052077	-0.0254579	0.234145	0.0123543	-0.210602	-0.151831	0.00928348	-0.0414897	0.238635	0.0771845	0.0391298	-0.00209065	0.249809	0.0298686	-0.163528	0.0672518	0.376366	0.0370025	0.276923	-0.166494
-3	-0.219102	-0.160375	0.214778	0.399966	0.106279	0.0190657	0.0930898	0.00373638	-0.0200055	0.153373	0.0220766	-0.241775	-0.0340186	0.0486716	-0.0552907	0.351249	0.0392975	0.0946429	0.0188201	0.241433	0.103114	-0.156113	0.132009	0.36371	-0.0412142	0.250743	-0.252901
-2.75	-0.178551	-0.234804	0.261275	0.417953	0.106736	-0.0552707	0.0295239	-0.0580095	-0.0200842	0.0584153	-0.0117091	-0.159431	0.0903273	0.0193893	0.0253711	0.45114	0.0558483	0.16952	0.0376332	0.220302	0.160689	-0.140415	0.102251	0.287693	-0.165644	0.141139	-0.281839
-2.5	-0.0969325	-0.234599	0.310328	0.346619	0.0969722	-0.0696651	0.0311129	-0.187101	-0.00598279	0.0068172	-0.0505716	-0.0150845	0.19213	-0.0100604	0.105825	0.502761	0.20777	0.202395	0.0580343	0.197402	0.163537	-0.149644	0.0372002	0.198903	-0.284179	0.023548	-0.227874
-2.25	-0.0807763	-0.217877	0.292532	0.273694	0.018065	0.026954	0.0869781	-0.248847	0.0653589	0.0577356	-0.0286297	0.112432	0.27758	0.0833994	0.144088	0.539278	0.355078	0.213714	0.0795151	0.193235	0.10652	-0.176132	0.0529338	0.158819	-0.359727	-0.0596111	-0.19551
-2	-0.171843	-0.201165	0.195416	0.213438	-0.0901737	0.188126	0.146927	-0.220769	0.174032	0.218564	0.0737177	0.189418	0.349253	0.298908	0.203549	0.595343	0.349387	0.218896	0.0956313	0.21145	0.0648301	-0.200274	0.132001	0.164634	-0.401811	-0.107617	-0.164041
-1.75	-0.240816	-0.123367	0.0501204	0.160393	-0.130215	0.3578	0.15896	-0.153424	0.220657	0.398948	0.205572	0.217588	0.394857	0.542897	0.288306	0.66024	0.321372	0.236757	0.102576	0.229124	0.0312983	-0.210534	0.181319	0.177605	-0.39777	-0.138416	-0.0697139
-1.5	-0.211741	0.00238376	-0.0679115	0.153514	-0.0718605	0.490465	0.200203	-0.131288	0.172635	0.517038	0.295658	0.254584	0.448044	0.708139	0.279164	0.71843	0.374271	0.273109	0.108605	0.233523	-0.00231205	-0.20943	0.137251	0.199144	-0.331259	-0.116849	0.0798163
-1.25	-0.126823	0.0766071	-0.0984821	0.177541	-0.00589865	0.52821	0.304432	-0.153424	0.117839	0.524022	0.320073	0.26075	0.566857	0.822557	0.217634	0.760226	0.499043	0.334341	0.0831842	0.234045	-0.0288929	-0.215393	-0.0170576	0.233765	-0.169138	-0.0596045	0.136487
-1	-0.047781	0.0527342	-0.0710129	0.266831	0.0119492	0.515228	0.404654	-0.187101	0.0870516	0.412022	0.277735	0.172416	0.719679	0.861954	0.256609	0.73883	0.650817	0.381499	0.0293016	0.214259	-0.0315782	-0.239572	-0.155927	0.286068	0.0544029	-0.0642175	0.0584895
-0.75	0.0950496	0.0499135	-0.0640855	0.411902	-0.00666714	0.477084	0.456249	-0.193033	0.0283574	0.211526	0.146431	0.0220749	0.76953	0.722078	0.386142	0.596201	0.672677	0.388391	-0.0544377	0.146944	-0.0777105	-0.263888	-0.180434	0.330488	0.218142	-0.0906694	-0.0142917
-0.5	0.422866	0.174688	-0.0615144	0.50754	-0.0407619	0.285365	0.451872	-0.18116	-0.132268	0.0319976	-0.0268032	-0.116445	0.608741	0.419204	0.43512	0.314383	0.463953	0.350581	-0.152724	0.00487216	-0.166946	-0.270317	-0.136359	0.292478	0.238965	-0.0380443	-0.0166037
-0.25	0.866927	0.378247	-0.0212178	0.41934	-0.118896	-0.137095	0.4307	-0.226702	-0.392094	-0.0707745	-0.190073	-0.224605	0.264084	0.0889335	0.289656	-0.0204315	0.198279	0.296186	-0.250538	-0.208321	-0.252736	-0.282456	-0.0716097	0.12794	0.123343	0.0715667	-0.0210486
0	1.08989	0.422618	0.0302052	0.225001	-0.227939	-0.697327	0.353113	-0.288448	-0.657438	-0.165308	-0.265179	-0.261769	-0.0806667	-0.181985	0.0517933	-0.251031	0.0593141	0.25819	-0.300731	-0.411159	-0.310797	-0.285722	-0.0520496	-0.103106	-0.093261	0.0841664	-0.0878064
0.25	0.860359	0.208332	0.0761045	0.0580462	-0.301435	-1.1136	0.190264	-0.282515	-0.764107	-0.230395	-0.241854	-0.207602	-0.249248	-0.386582	-0.130087	-0.293047	-0.0143276	0.199303	-0.273685	-0.498156	-0.321361	-0.251712	-0.0716097	-0.247825	-0.371359	-0.0118579	-0.189841
0.5	0.418792	-0.00402278	0.172326	-0.0488143	-0.248849	-1.23936	0.00433271	-0.226702	-0.69407	-0.206556	-0.158206	-0.100252	-0.206757	-0.433707	-0.172263	-0.198465	-0.0629021	0.101653	-0.186211	-0.452104	-0.30433	-0.19303	-0.131117	-0.262382	-0.617039	-0.133803	-0.243961
0.75	0.130213	-0.047982	0.281739	-0.0596572	-0.103097	-1.14992	-0.105954	-0.153424	-0.560413	-0.121574	-0.0546337	0.033087	-0.0378123	-0.320723	-0.123681	-0.0702053	-0.0268451	-0.0122928	-0.0359401	-0.372384	-0.299399	-0.150418	-0.190919	-0.21731	-0.695131	-0.212608	-0.213396
1	-0.00305402	0.00238376	0.331498	0.0194168	0.0406564	-0.96406	-0.106191	-0.0639505	-0.419593	-0.0568976	0.0813788	0.152423	0.168452	-0.158218	-0.057025	0.0513432	0.0234153	-0.0538299	0.145404	-0.309382	-0.329902	-0.127243	-0.215426	-0.151686	-0.588108	-0.238788	-0.163804
1.25	-0.0472646	0.0429681	0.289579	0.0920889	0.12449	-0.759537	-0.0203185	0.0374049	-0.296934	-0.0123965	0.247419	0.217592	0.329292	-0.0578869	-0.0432319	0.183694	-0.0108153	-0.0167811	0.272428	-0.23222	-0.363912	-0.133174	-0.220668	-0.0721179	-0.391623	-0.243401	-0.113284
1.5	-0.0818618	0.130322	0.193391	0.0795888	0.167335	-0.544742	0.119608	0.0492784	-0.251509	0.0558281	0.390167	0.220587	0.406241	-0.0297006	-0.0292535	0.310334	-0.0411889	0.0142348	0.28423	-0.127445	-0.360456	-0.153303	-0.190919	-0.00134789	-0.220304	-0.243401	3.54203e-05
1.75	-0.109457	0.320736	0.0935929	0.0531866	0.17449	-0.307593	0.242826	-0.0639505	-0.297257	0.141714	0.474806	0.175411	0.402192	-0.038945	0.0358624	0.36237	-0.047735	-0.0110812	0.204222	-0.0218209	-0.308877	-0.153095	-0.136359	0.0352145	-0.142554	-0.243401	0.108694
2	-0.122227	0.463202	0.0388768	0.0615712	0.133108	-0.0653285	0.316762	-0.119764	-0.343616	0.195877	0.509884	0.107242	0.344858	-0.0253661	0.124957	0.336149	-0.0720907	-0.0785769	0.110873	0.0399114	-0.205906	-0.151314	-0.0716097	0.0123908	-0.130336	-0.217221	0.140028
2.25	-0.1085	0.384433	0.0358756	0.0388434	0.0721703	0.135964	0.329355	-0.0798129	-0.30539	0.228645	0.512418	0.0250743	0.30038	0.032955	0.175778	0.264438	-0.100494	-0.150711	0.0459166	0.0510793	-0.0957994	-0.172509	-0.0520496	-0.0616923	-0.125547	-0.143029	0.120536
2.5	-0.0885647	0.212667	0.0164157	-0.0305668	0.0672295	0.24223	0.355848	-0.0580095	-0.198076	0.252372	0.486905	-0.0712687	0.315848	0.113811	0.188011	0.180169	-0.0906225	-0.2131	0.0120852	0.0341384	0.0113657	-0.213051	-0.0121098	-0.16177	-0.0827144	-0.0642175	0.0734213
2.75	-0.0949707	0.0670314	-0.0754997	-0.0920033	0.109203	0.269056	0.404177	-0.097619	-0.103535	0.271484	0.441862	-0.128434	0.368216	0.190996	0.188115	0.100886	-0.0460526	-0.255714	0.0127738	0.0110572	0.11939	-0.248557	0.0375018	-0.249924	-0.0344575	-0.0380377	0.00834114
3	-0.0829548	0.00932912	-0.211828	-0.110061	0.14117	0.271497	0.395825	-0.113823	-0.0834125	0.237752	0.38459	-0.0942614	0.418178	0.253023	0.19356	0.0466604	0.0392975	-0.240249	0.0251321	-0.0103327	0.207569	-0.274578	0.0476992	-0.304778	-0.00737675	-0.0426573	-0.0932712
3.25	-0.0531345	-0.0143379	-0.290455	-0.137005	0.131083	0.271826	0.285084	-0.058018	-0.110864	0.17519	0.353591	-0.040091	0.448937	0.295396	0.167132	0.0137434	0.0846907	-0.189166	0.0469559	-0.0102781	0.236061	-0.273547	-0.0468076	-0.318832	0.0202384	-0.00724486	-0.149191
3.5	0.0179195	-0.0622792	-0.26343	-0.170398	0.104784	0.263817	0.186967	0.104742	-0.110907	0.134364	0.313797	-0.0690782	0.431011	0.307548	0.109414	-0.0157152	0.0250977	-0.155129	0.0747637	0.0408715	0.229443	-0.229951	-0.131419	-0.281787	0.0780304	0.0407673	-0.160961
3.75	0.0941843	-0.112635	-0.176916	-0.144882	0.0895589	0.171575	0.159213	0.273776	-0.0499763	0.141611	0.237784	-0.111432	0.358244	0.258715	0.0167284	-0.0596789	-0.083792	-0.176906	0.0966131	0.12474	0.234626	-0.178007	-0.125875	-0.193116	0.124753	0.0623341	-0.153636
4	0.0907996	-0.160375	-0.113656	-0.075983	0.101003	0.00971761	0.175727	0.301512	0.0174018	0.11813	0.140859	-0.0912662	0.27441	0.164144	-0.0639308	-0.114715	-0.159267	-0.239274	0.0950983	0.201573	0.246967	-0.172005	-0.0418597	-0.0765527	0.126596	0.0931269	-0.130931
4.25	-0.00269817	-0.153425	-0.107319	0.00880865	0.149589	-0.124108	0.196954	0.17242	0.0465431	0.0639446	0.0780228	-0.0460856	0.239265	0.089684	-0.109492	-0.163048	-0.178475	-0.267655	0.075339	0.228939	0.25447	-0.201586	0.0322598	0.0213511	0.0826281	0.141139	-0.0906573
4.5	-0.103642	-0.102869	-0.12794	0.0403161	0.187551	-0.158046	0.218936	0.0211926	0.0407709	0.0203278	0.0595209	-0.0290875	0.236263	0.0856762	-0.0831686	-0.205283	-0.129038	-0.237437	0.0848221	0.195875	0.241762	-0.223313	0.0774492	0.0502153	0.036433	0.198118	-0.0446855
4.75	-0.198767	-0.0586985	-0.148507	0.0176175	0.179944	-0.138498	0.224736	-0.0857539	0.0154136	-0.0192486	0.0644822	-0.0150888	0.221564	0.0736942	-0.0449768	-0.247141	-0.0552412	-0.186206	0.119924	0.142092	0.208323	-0.208655	0.0375018	0.00307624	0.0201688	0.189151	-0.0456935
5	-0.298406	-0.0587036	-0.167275	-0.0224623	0.162698	-0.114871	0.208096	-0.147491	-0.0188015	-0.0895981	0.066701	0.00508106	0.169609	0.0228779	-0.0446824	-0.279764	-0.000943924	-0.156574	0.151464	0.0979341	0.145764	-0.185889	-0.0418597	-0.0483837	0.0331684	0.176286	-0.129921
5.25	-0.32248	-0.086152	-0.175801	-0.0377233	0.15548	-0.025982	0.202776	-0.187101	-0.0335642	-0.154315	0.0963462	-0.00609486	0.100496	-1.951e-07	-0.121832	-0.27693	0.0603279	-0.176686	0.133869	0.049676	0.0431629	-0.170803	-0.096125	-0.0531092	0.0167745	0.162965	-0.208394
5.5	-0.273932	-0.109054	-0.148396	-0.0636675	0.178624	0.098733	0.196264	-0.159365	-0.00825547	-0.123779	0.179203	-0.0690825	0.0484859	0.0251785	-0.151883	-0.240297	0.243395	-0.242629	0.0893249	-0.0138809	-0.0548027	-0.172474	-0.0768592	-0.0337309	-0.0741538	0.154726	-0.197695
5.75	-0.245461	-0.180668	-0.0866247	-0.118347	0.20569	0.150198	0.144907	-0.052077	0.0109102	-0.00286264	0.266546	-0.105437	0.0347093	0.0677615	-0.0236038	-0.193739	0.491821	-0.307288	0.0428066	-0.0642038	-0.0909202	-0.184686	-0.0118081	-0.0383801	-0.193596	0.0887729	-0.0906573
6	-0.254861	-0.258672	-0.0313995	-0.175807	0.205636	0.107294	0.0750804	0.00373638	0.0155981	0.107395	0.279149	-0.142261	0.0626235	0.0692036	0.205406	-0.161207	0.622428	-0.366417	0.0289523	-0.074052	-0.0640984	-0.197254	-0.0170502	-0.0803422	-0.280577	0.0666816	0.0313143
6.25	-0.23621	-0.251521	0.00972335	-0.151696	0.159092	0.0647404	0.0483377	0.0093275	0.02014	0.127622	0.248466	-0.196595	0.0911204	0.0427588	0.375157	-0.148701	0.492501	-0.395344	0.0506445	-0.0523509	-0.0333456	-0.217774	-0.0768592	-0.151016	-0.285913	0.124185	0.0812
6.5	-0.180839	-0.163951	0.0374931	-0.0481391	0.0539028	0.0470684	0.0751681	0.0373964	0.0355552	0.100676	0.26993	-0.193604	0.0692195	-0.0154886	0.380599	-0.117893	0.205116	-0.38738	0.0940269	-0.0273073	0.0141371	-0.229988	-0.0716171	-0.20778	-0.244289	0.167325	0.0913604
6.75	-0.1523	-0.0384064	0.0578294	0.0553357	-0.0712035	0.0509824	0.046186	0.0829469	0.0280669	0.120512	0.357572	-0.0972565	0.0130263	-0.0829048	0.242529	-0.0511249	0.0640303	-0.348516	0.11533	0.0100829	0.0698148	-0.22093	-0.0118081	-0.221357	-0.219819	0.141139	0.152027
7	-0.176374	0.0324421	0.0568351	0.142495	-0.129424	0.078605	-0.0594192	0.0433374	0.0116171	0.169062	0.395829	0.00508533	-0.0247522	-0.0918501	0.0815251	0.0122491	0.103888	-0.316251	0.0995523	0.0569314	0.10701	-0.204996	0.0126998	-0.187933	-0.259399	0.0669471	0.234949
7.25	-0.229245	0.0596847	0.0463449	0.2234	-0.105057	0.116923	-0.121223	-0.030282	0.0255949	0.181161	0.354083	0.033087	-0.029538	-0.0050789	0.00292736	0.0419048	0.207633	-0.294373	0.0930327	0.082664	0.137735	-0.205343	0.0372002	-0.123754	-0.307188	-0.00263186	0.227733
7.5	-0.254534	0.0598854	0.0611232	0.273335	-0.0800814	0.098176	-0.0517071	-0.0461444	0.0707185	0.168147	0.278717	0.0160846	-0.0410811	0.107452	0.00613061	0.053659	0.248015	-0.271734	0.106729	0.068972	0.197255	-0.184722	0.132001	-0.051034	-0.239166	-0.0642241	0.132545
7.75	-0.222351	0.0429681	0.0878323	0.299997	-0.119412	0.0541319	0.0739764	-0.0184085	0.107913	0.141781	0.220779	0.0138984	-0.0647052	0.172322	0.0130337	0.0407759	0.193429	-0.24358	0.114492	0.0295583	0.255792	-0.153019	0.25131	0.0129312	-0.0737262	-0.055257	0.0121144
8	-0.143045	-0.0179135	0.121373	0.370908	-0.196678	0.0665026	0.141797	0.0314639	0.112249	0.105025	0.164752	-0.0319145	-0.061178	0.216294	-0.0359386	-0.0336607	0.0895473	-0.215383	0.0875462	-0.00685511	0.278948	-0.150282	0.265628	0.0455058	0.0362955	0.00996788	-0.0328454
8.25	-0.0774615	-0.0959182	0.170475	0.477414	-0.25263	0.124532	0.119067	0.183952	0.089023	0.047774	0.119196	-0.0914343	-0.00255252	0.249941	-0.121939	-0.128942	-0.024343	-0.163646	0.0556954	-0.0473665	0.292206	-0.167786	0.196751	0.0495843	0.008742	0.0931335	0.042224
8.5	-0.0544158	-0.136508	0.208975	0.485085	-0.295089	0.179864	0.0405902	0.295912	0.037325	-0.0185642	0.107619	-0.111264	0.068785	0.28718	-0.146228	-0.192267	-0.104826	-0.120678	0.042208	-0.0964697	0.320439	-0.188097	0.102244	0.0679142	-0.0602429	0.141139	0.0943745
8.75	-0.0912544	-0.136503	0.168073	0.316913	-0.359401	0.230409	-0.0316131	0.245707	-0.0296981	-0.0766489	0.125665	-0.077259	0.124235	0.318825	-0.0675243	-0.207279	-0.152433	-0.0918621	0.0292914	-0.146234	0.326072	-0.214155	0.0476918	0.115313	-0.0725701	0.162706	0.0274554
9	-0.134678	-0.11621	0.0477195	0.15251	-0.417528	0.2506	-0.0532607	0.110666	-0.123554	-0.100752	0.131166	-0.0770866	0.160415	0.293175	0.0705424	-0.205889	-0.192671	-0.0774236	0.00726871	-0.177234	0.29444	-0.239108	-0.00656605	0.162914	-0.0265915	0.176551	-0.0878939
9.25	-0.151092	-0.106444	-0.0684343	0.141801	-0.418114	0.230235	-0.0236678	0.0710649	-0.232818	-0.0640054	0.119305	-0.165421	0.177248	0.205182	0.133815	-0.184585	-0.192819	-0.0451462	-0.0105529	-0.191111	0.275054	-0.240677	-0.0471093	0.189708	0.0351302	0.141139	-0.14395
9.5	-0.132503	-0.11263	-0.133868	0.188157	-0.391627	0.186891	-0.011828	0.100753	-0.333093	-0.00932017	0.130301	-0.224777	0.182294	0.12903	0.0654931	-0.118344	-0.148101	-0.0204808	-0.024563	-0.204266	0.256779	-0.234811	-0.0170576	0.239568	0.0761832	0.0931269	-0.10977
9.75	-0.124325	-0.140083	-0.151237	0.192611	-0.425153	0.154797	-0.0356509	-0.0022046	-0.365983	0.0191103	0.120733	-0.179428	0.173171	0.102353	-0.0624777	-0.0358506	-0.0881133	-0.0656674	-0.0693359	-0.204882	0.165626	-0.220364	0.0231914	0.3363	0.0896847	0.0453803	-0.0450612
10	-0.164059	-0.0827822	-0.127991	0.221594	-0.505432	0.0987487	-0.0805846	-0.125696	-0.32316	0.0283612	0.0520658	-0.0572615	0.157253	0.114648	-0.117846	-0.0189151	-0.12206	-0.118564	-0.133231	-0.17691	0.0186282	-0.197892	-0.0520496	0.441728	0.0744999	-0.0334247	-0.00634783
10.25	-0.20012	0.063466	-0.0672191	0.305827	-0.551312	0.0438399	-0.137092	-0.169295	-0.223079	0.0062147	-0.0233975	0.0442629	0.138986	0.105906	-0.099001	-0.0747286	-0.195317	-0.102103	-0.175291	-0.139046	-0.0782387	-0.167183	-0.131419	0.489569	-0.00463237	-0.138416	-0.0484667
10.5	-0.210924	0.157987	-0.0038712	0.332593	-0.545066	0.0366595	-0.196695	-0.193033	-0.158291	-0.0310876	-0.037037	0.15225	0.11556	0.0357019	-0.053827	-0.12442	-0.256312	-0.010791	-0.179428	-0.114655	-0.102819	-0.135727	-0.096125	0.471262	-0.128974	-0.186428	-0.0804929
10.75	-0.151227	0.150825	0.0310219	0.251353	-0.533261	0.0453846	-0.240064	-0.193033	-0.173672	-0.0613343	-0.00521605	0.203762	0.0735809	-0.0437661	-0.0532214	-0.13414	-0.297369	0.0636662	-0.129977	-0.099291	-0.0665427	-0.122948	-0.0170502	0.418911	-0.2155	-0.138416	0.00833917
11	-0.0770635	0.185219	0.026202	0.169481	-0.523785	0.0526326	-0.270912	-0.113823	-0.227514	-0.0779877	0.0208249	0.107251	0.0160324	-0.101338	-0.0941619	-0.134463	-0.289859	0.0651048	-0.0455644	-0.0875223	-0.0109023	-0.141729	-0.0170502	0.359664	-0.216481	-0.0380377	0.108694
11.25	-0.0925357	0.259854	0.0121419	0.117649	-0.486185	0.0553267	-0.29178	-0.0358731	-0.263655	-0.126159	0.016439	-0.0602694	-0.021473	-0.17416	-0.0502414	-0.142376	-0.28052	0.029276	0.0378942	-0.0929358	-0.00502488	-0.162287	-0.0768592	0.31086	-0.178408	0.0623341	0.121554
11.5	-0.136224	0.242942	0.0399089	0.00809949	-0.448062	0.118188	-0.280388	-0.0184	-0.255008	-0.213169	-0.0193087	-0.125439	-0.0282888	-0.262406	0.0291826	-0.133596	-0.294864	0.010389	0.0615076	-0.0907268	-0.0368647	-0.174818	-0.101367	0.313872	-0.141791	0.136526	0.0787985
11.75	-0.111754	0.10047	0.0664725	-0.0894131	-0.440292	0.189137	-0.210513	-0.0916865	-0.222759	-0.289703	-0.0670694	-0.0992704	-0.0209667	-0.298827	-0.0185441	-0.0853757	-0.323267	0.0259716	0.0593495	-0.0506387	-0.0186617	-0.203254	-0.0961175	0.349309	-0.0949339	0.145759	0.0732581
12	-0.0782784	-0.0384165	0.062918	-0.0780844	-0.462131	0.182549	-0.125369	-0.125696	-0.207555	-0.290458	-0.0793512	-0.0832535	-0.0242892	-0.243019	-0.169562	0.0018932	-0.304203	0.0487699	0.085423	0.00718175	0.0691898	-0.234248	-0.136359	0.368857	-0.078959	0.0931269	0.139091
12.25	-0.115395	-0.101903	0.0436104	0.0557453	-0.48719	0.0997592	-0.0964746	-0.0798129	-0.225907	-0.219826	-0.0697028	-0.0550795	-0.0432306	-0.157655	-0.221235	0.0873472	-0.228584	0.0693298	0.14489	0.0256364	0.161014	-0.22271	-0.190919	0.360547	-0.111236	0.0361477	0.184986
12.5	-0.145552	-0.140083	0.0333436	0.164393	-0.445925	0.0363874	-0.0967589	-0.0580095	-0.276188	-0.115273	-0.0371146	0.0338959	-0.0689618	-0.115635	-0.139224	0.151079	-0.112329	0.108723	0.182716	-0.0194023	0.200405	-0.185077	-0.215426	0.361025	-0.129766	0.0805272	0.153039
12.75	-0.0759919	-0.0827822	0.0345139	0.16438	-0.339908	0.00611709	-0.0768643	0.00338651	-0.357003	-0.0309119	0.00654387	0.0954296	-0.0968254	-0.149497	-0.0240926	0.183452	-0.0200075	0.157468	0.1421	-0.0883947	0.186098	-0.172043	-0.190919	0.373166	-0.0782025	0.158352	0.108904
13	0.00223991	0.10405	0.0281752	0.0702003	-0.267344	-0.0471253	-0.0492257	0.17242	-0.416413	-0.0310993	0.0172061	0.101256	-0.14029	-0.225623	0.00254502	0.165963	-0.00580407	0.164303	0.0397436	-0.12564	0.142949	-0.186564	-0.136359	0.395446	0.00370111	0.224305	0.0959666
13.25	0.000555369	0.232416	0.0312938	-0.0215269	-0.260023	-0.139429	-0.0126588	0.347054	-0.403483	-0.113502	-0.0473652	0.0480669	-0.173246	-0.276351	-0.0835615	0.0906778	-0.0787807	0.0748472	-0.0589122	-0.112562	0.118286	-0.208618	-0.0716097	0.4443	0.0501643	0.193764	0.0955949
13.5	-0.0198758	0.157987	0.0507954	-0.0609841	-0.247501	-0.242534	-0.0132488	0.390985	-0.337869	-0.173276	-0.164624	-0.0350863	-0.150081	-0.24877	-0.14808	-0.0197414	-0.169283	-0.0584778	-0.109942	-0.0925893	0.108091	-0.229952	-0.0222997	0.509061	0.0622822	0.193233	0.0774965
13.75	0.00574125	0.02246	0.0512463	0.000696892	-0.218736	-0.293944	-0.0336336	0.40845	-0.268702	-0.157831	-0.240079	0.0137217	-0.114671	-0.162386	-0.0534421	-0.0938893	-0.164275	-0.156726	-0.111709	-0.0985163	0.0731203	-0.220366	0.0721996	0.55647	0.0809165	0.298749	0.0302188
14	0.0124512	0.0226657	-0.0169859	0.134632	-0.209989	-0.309775	-0.0495608	0.414724	-0.25908	-0.149492	-0.232368	0.152591	-0.113772	-0.0970784	0.161586	-0.0736533	-0.0929806	-0.185724	-0.066578	-0.108214	0.00746467	-0.182095	0.186561	0.547722	0.15493	0.355741	-0.0197466
14.25	-0.03698	0.155372	-0.121785	0.218624	-0.203628	-0.339736	-0.0485225	0.374781	-0.321081	-0.190487	-0.193563	0.288588	-0.137167	-0.125732	0.329887	0.0134932	-0.0201515	-0.118784	-0.000603741	-0.0967853	-0.0565485	-0.156885	0.246068	0.497892	0.263345	0.189151	-0.0416242
14.5	-0.102757	0.18467	-0.204237	0.166799	-0.16184	-0.375042	-0.0665656	0.273767	-0.364876	-0.236981	-0.186265	0.311108	-0.152898	-0.177166	0.305199	0.0786127	0.0770333	-0.0163255	0.030025	-0.0735398	-0.0645417	-0.165404	0.216311	0.412505	0.342879	-0.0336967	-0.0419999
14.75	-0.116285	0.10385	-0.265123	0.0475518	-0.121999	-0.386094	-0.129444	0.122548	-0.345366	-0.25186	-0.216321	0.229409	-0.162722	-0.180909	0.168768	0.0694836	0.198437	0.0595941	0.0293598	-0.0487601	-0.0219881	-0.188134	0.132001	0.300674	0.361202	-0.0983972	-0.0211283
15	-0.110465	-0.0346352	-0.288749	-0.0493867	-0.131261	-0.353211	-0.180688	-0.0857539	-0.310201	-0.23235	-0.238532	0.0762367	-0.171387	-0.181354	0.0957137	0.0347456	0.288112	0.0590276	0.0592178	-0.011062	0.0466382	-0.205172	0.0529338	0.211395	0.327136	-0.0596045	0.0499988

## Sheet: Fig 5 fig suppl 2Bii
Go poke onset (sec)	Up					Down
-7	-0.336532	-0.0658377	-0.10889	0.0738761	0.291329	-0.442912	0.412119	-0.225561	0.0112195	-0.324399	-0.322116	0.013612	0.0969027	0.112353	-0.35457	0.107636	0.163061	-0.135059	-0.387974	-0.111706	-0.368258	-0.159455	-0.0730062	-0.264377	-0.390964	-0.0253615	-0.166402	0.0898432	-0.0970918	0.393351	0.0842592	0.0313852	0.292388	0.0905689
-6.75	-0.336532	0.0307822	-0.126853	0.108372	0.275215	-0.276652	0.366963	-0.225561	0.0192701	-0.415777	-0.168203	-0.0604112	-0.0183141	-0.0466666	-0.31081	0.170788	0.288574	-0.266534	-0.284613	-0.157097	-0.412633	-0.0715929	-0.0160213	-0.318711	-0.3878	0.0209067	-0.121741	0.110573	0.0271114	0.359128	-0.0904329	0.0185586	0.320512	0.147217
-6.5	-0.336532	0.0952543	-0.299674	0.0252226	0.265483	-0.0478855	0.24707	-0.225561	-0.117442	-0.324399	0.114064	-0.119255	-0.0652901	-0.217286	-0.213393	0.196782	0.375254	-0.403793	-0.0950558	-0.246552	-0.376077	0.224763	0.0620757	-0.370409	-0.364551	0.0568654	-0.0262909	0.27933	0.202231	0.276486	-0.121261	0.127995	0.199898	0.205932
-6.25	-0.336532	-0.056886	-0.457511	-0.092013	0.282009	0.243567	0.152081	0.0596721	-0.293314	-0.0100529	0.295136	-0.178773	-0.0751906	-0.344864	-0.150901	0.119627	0.289589	-0.431134	0.0782241	-0.361996	-0.294697	0.445081	0.0815545	-0.372628	-0.214195	0.0908978	0.0402411	0.521118	0.202231	0.187785	-0.0526217	0.259615	0.0472317	0.20577
-6	-0.336532	-0.181026	-0.496807	-0.092013	0.260601	0.715636	0.200326	0.868004	-0.296111	0.545711	0.114064	-0.202043	-0.145751	-0.458316	-0.213393	-0.0364371	0.07017	-0.310881	0.154764	-0.51651	-0.242492	0.371847	0.0725479	-0.274505	-0.0402164	0.103653	0.0399267	0.644458	0.016224	0.15394	-0.0592157	0.278787	-0.0603117	0.1069
-5.75	-0.336532	-0.120314	-0.447136	0.0738761	0.194208	1.18043	0.291418	1.72667	-0.0700492	0.952559	-0.01429	-0.143629	-0.260966	-0.54243	-0.31081	-0.214187	-0.154966	-0.146605	0.215564	-0.620501	-0.205948	0.180891	0.0275715	-0.144912	-0.0285877	0.0814666	-0.0282167	0.579519	-0.147993	0.174764	-0.171872	0.203705	-0.181563	0.000605832
-5.5	-0.336532	-0.0426002	-0.382275	0.218308	0.150817	1.18466	0.316072	1.72667	0.216401	0.87963	0.141184	-0.0529477	-0.378653	-0.568467	-0.35457	-0.319289	-0.279072	-0.0922635	0.294576	-0.61165	-0.124568	0.124282	0.0115096	-0.101481	-0.163306	0.00850538	-0.13068	0.474497	-0.0862045	0.163232	-0.233908	0.204193	-0.203029	-0.0828604
-5.25	-0.336532	-0.057165	-0.339183	0.191112	0.161394	0.756305	0.448716	0.868004	0.307249	0.323838	0.295136	0.0243827	-0.399201	-0.534543	-0.363929	-0.297728	-0.285012	-0.119605	0.249543	-0.549826	-0.0567143	0.240299	0.0169126	-0.0768614	-0.315795	-0.084422	-0.167466	0.380388	0.12954	0.089831	-0.2027	0.310852	-0.0833226	-0.0984181
-5	-0.206329	-0.0846787	-0.303471	0.0252122	0.149294	0.263936	0.727791	0.109931	0.201665	-0.08301	0.114064	0.0380738	-0.292889	-0.472607	-0.31081	-0.220045	-0.275727	-0.140836	0.139011	-0.532742	-0.124568	0.329265	0.0890205	-0.0272034	-0.37849	-0.0881414	-0.100706	0.130471	0.274922	0.0495066	-0.0904235	0.404892	0.0802074	-0.138581
-4.75	0.0324544	-0.0785145	-0.248978	-0.0506482	0.0544441	0.0718491	0.963055	-0.175302	0.0723411	-0.0818852	-0.01429	-0.0410725	-0.0816676	-0.391306	-0.213393	-0.225572	-0.317621	-0.179399	-0.0251627	-0.547234	-0.161574	0.192592	0.152429	-0.009358	-0.343248	0.0625689	-0.0224603	-0.0239468	0.12954	0.0848335	0.00281116	0.406916	0.101665	-0.224743
-4.5	0.185632	-0.199588	-0.234812	-0.00156489	-0.0880152	0.0771528	0.898152	-0.225561	0.104626	0.00951987	0.141184	-0.130805	0.0567863	-0.328454	-0.150901	-0.328558	-0.370502	-0.20674	0.0168873	-0.529019	-0.1011	0.026256	0.164945	-0.041656	-0.196233	0.237787	-0.00845007	0.0324381	-0.0970918	0.158123	0.134499	0.336951	0.0798683	-0.27201
-4.25	0.0324544	-0.336685	-0.278123	0.0252226	-0.161354	-0.0057771	0.657954	0.0596721	0.192945	-0.120975	0.295136	-0.0929303	0.0636878	-0.253272	-0.160274	-0.401637	-0.31983	-0.185184	0.328555	-0.441052	-0.0279889	-0.0390398	0.143357	-0.100811	-0.0792988	0.265179	-0.0151833	0.159927	-0.137105	0.219672	0.22151	0.285849	0.107408	-0.20592
-4	-0.206329	-0.33642	-0.353136	0.0179236	-0.0870409	-0.184724	0.510712	0.582771	0.216	-0.213477	0.267977	-0.00548228	0.0397959	-0.128844	-0.160274	-0.367381	-0.189927	-0.108042	0.578401	-0.317978	0.00118646	-0.124658	0.0848759	-0.159337	-0.0944513	0.161776	0.01904	0.211861	-0.0455643	0.260635	0.209733	0.272097	0.15699	-0.0348278
-3.75	-0.31359	-0.112471	-0.44334	0.0325113	0.102549	-0.274195	0.523607	0.918335	0.250534	-0.10143	0.267977	0.0320163	0.0777809	-0.00161115	-0.141542	-0.277935	-0.126184	0.0118699	0.508482	-0.197515	-0.0123398	-0.253971	0.100728	-0.1835	-0.199224	0.107504	0.0578543	0.261861	0.0889152	0.271233	0.0159991	0.260182	0.134294	0.112391
-3.5	-0.336532	0.251192	-0.461308	-0.00885354	0.275422	-0.179157	0.652325	0.582771	0.353988	0.120442	0.322256	-0.0163324	0.1128	0.0559615	-0.160274	-0.21088	-0.196735	0.159131	0.328031	-0.088309	-0.161124	-0.260628	0.288392	-0.133651	-0.297833	0.166093	0.0195535	0.332282	0.12954	0.226377	-0.05339	0.22552	0.139722	0.114446
-3.25	-0.336532	0.447898	-0.317642	-0.0993017	0.373211	-0.0215661	0.643374	0.0596721	0.445848	0.193371	0.267977	-0.0916315	0.125839	0.0569278	-0.160274	-0.180309	-0.300046	0.253612	0.191202	0.00123172	-0.331703	-0.0647393	0.444888	-0.0121452	-0.345558	0.265986	-0.0231703	0.427889	0.0889152	0.180466	0.128646	0.180562	0.222586	0.0508515
-3	-0.336532	0.351829	-0.091141	-0.133378	0.397923	0.0705266	0.502985	-0.175302	0.43162	0.231364	0.267977	-0.131143	0.141878	0.0505623	-0.0884225	-0.201683	-0.365554	0.197694	0.0782111	0.0325781	-0.404814	0.145788	0.342041	0.0648761	-0.274585	0.342301	-0.0515338	0.568208	0.0271114	0.168906	0.359811	0.139403	0.226792	0.0404816
-2.75	-0.336532	0.0677199	-0.000931231	-0.126079	0.360313	0.104874	0.395392	-0.225561	0.415605	0.323838	0.322256	-0.142498	0.211086	0.0299885	-0.0628575	-0.241894	-0.404765	0.137567	0.120772	0.0381795	-0.331703	0.264732	0.156289	0.0372129	-0.040403	0.364017	-0.107601	0.670332	0.016224	0.118539	0.358391	0.0938688	0.118595	0.122745
-2.5	-0.336532	-0.226079	-0.134457	-0.182031	0.244602	0.183959	0.43767	-0.225561	0.624327	0.434789	0.267977	-0.148212	0.293372	0.00534816	-0.0446632	-0.221797	-0.387606	0.100898	0.371129	0.111206	-0.124568	0.448008	0.164722	0.0328113	0.226528	0.325014	-0.134253	0.658839	0.0380143	-0.0153442	0.277974	0.0469515	-0.0775719	0.224764
-2.25	-0.336532	-0.43705	-0.313846	-0.257892	0.0649196	0.373867	0.688403	0.0596721	1.02836	0.343411	0.267977	-0.138859	0.345825	0.012055	-0.000378667	-0.125947	-0.246437	-0.0209156	0.535827	0.249987	0.0612212	0.681107	0.399514	0.137081	0.330616	0.237154	-0.155164	0.565124	0.016224	-0.158229	0.25411	-0.000886311	-0.203029	0.235126
-2	-0.336532	-0.474546	-0.363511	-0.291968	-0.0755515	0.581755	0.901623	0.582771	1.35752	-0.0100529	0.322256	-0.0862776	0.297217	-0.0082286	0.158992	-0.0294002	-0.0331473	-0.119613	0.310343	0.359395	0.0533911	0.747693	0.77045	0.283688	0.247649	0.139788	-0.0997743	0.495885	0.016224	-0.199032	0.227734	-0.0763342	-0.104789	0.216128
-1.75	-0.336532	-0.328019	-0.256582	-0.299256	-0.129809	0.647844	0.828975	0.918335	1.52645	-0.193932	0.114064	0.00350123	0.267965	0.00160206	0.469424	0.0604399	0.1822	-0.0309176	0.0259936	0.383298	0.05293	0.479663	1.15457	0.359841	0.00518517	0.0513481	-0.0126821	0.492802	0.161591	-0.177426	0.141473	-0.19159	0.134302	0.307614
-1.5	-0.336532	-0.148086	-0.069595	-0.299256	-0.105758	0.49785	0.520592	0.582771	1.63187	-0.10143	-0.168203	0.109952	0.334919	0.0719516	0.71739	0.172433	0.393699	0.132123	0.035624	0.399363	0.194784	0.0863658	1.30631	0.397674	-0.208053	0.050176	0.0485252	0.527099	0.304644	-0.151084	-0.0592251	-0.331979	0.303583	0.37702
-1.25	-0.206329	-0.144554	0.0244112	-0.299256	-0.0639587	0.237037	0.302355	0.0596721	1.56758	0.00951987	-0.141083	0.201059	0.348614	0.136502	0.638706	0.27397	0.565436	0.236273	0.182109	0.446195	0.291374	-0.139511	1.16547	0.423434	-0.240621	0.207684	0.0636656	0.513545	0.398499	-0.103902	-0.159063	-0.407121	0.226792	0.352823
-1	0.29286	-0.16293	-0.00875893	-0.257892	-0.0225229	0.04788	0.330904	-0.175302	1.39699	-0.120975	0.114064	0.280365	0.109376	0.0896159	0.256395	0.291694	0.629636	0.17647	0.112203	0.458389	0.126941	-0.10267	0.874861	0.352875	-0.207675	0.462432	0.0369915	0.364149	0.37732	0.0597047	-0.0152087	-0.343468	0.0529824	0.368214
-0.75	1.18401	-0.0102522	0.192748	-0.0579369	-0.0224875	0.0711019	0.419529	-0.225561	1.46105	-0.213477	0.295136	0.307652	-0.266101	-0.0990435	-0.0353168	0.184238	0.531985	0.0446553	-0.138154	0.310441	-0.10155	0.0545921	0.799243	0.0868692	-0.235316	0.629483	-0.0346363	0.206349	0.325808	0.367864	0.309182	-0.14136	-0.0718213	0.529551
-0.5	1.94496	0.186461	0.843892	0.342403	0.0325916	0.239235	0.503086	-0.225561	1.64561	-0.10143	0.267977	0.144441	-0.470016	-0.303063	-0.122822	-0.0353587	0.316669	-0.00936173	-0.318081	-0.00470531	-0.226866	0.0579256	0.950967	-0.238391	-0.25961	0.554802	-0.160224	0.143449	0.224006	0.579101	0.515073	0.0393755	-0.104781	0.623263
-0.25	2.07516	0.328885	1.59541	0.791406	0.197083	0.445367	0.387467	0.344905	1.26262	0.00951987	0.267977	-0.286835	-0.516664	-0.425515	-0.213393	-0.3158	0.00311007	-0.042139	-0.378868	-0.377035	-0.250323	-0.169236	1.09872	-0.445049	-0.183572	0.193871	-0.287382	0.0376003	0.016224	0.402885	0.45926	0.00605172	-0.115959	0.485486
0	1.57594	0.42494	2.1451	0.943127	0.411864	0.486286	-0.0518898	1.3911	0.135251	-0.120975	0.322256	-0.832408	-0.549875	-0.481089	-0.257691	-0.603893	-0.394653	-0.113828	-0.387974	-0.730726	-0.234673	-0.401957	0.888449	-0.531252	-0.151313	-0.354002	-0.402816	-0.134767	-0.0862045	-0.150633	0.196896	-0.227588	-0.143168	0.302731
0.25	0.991111	0.526894	2.41788	0.681469	0.476203	0.400634	-0.556796	2.06223	-0.955368	-0.324399	0.114064	-1.24431	-0.642328	-0.565341	-0.204034	-0.837005	-0.770357	-0.185184	-0.387974	-1.02452	-0.294697	-0.479843	0.452879	-0.58998	-0.235311	-0.861256	-0.514567	-0.280071	-0.0346769	-0.73296	-0.0398132	-0.521528	-0.208449	0.13701
0.5	0.577528	0.522318	2.32442	0.19838	0.375942	0.129479	-0.876007	1.3911	-1.42428	-0.415777	-0.168203	-1.44969	-0.713771	-0.666196	-0.150901	-0.975931	-1.00595	-0.227963	-0.336294	-1.19488	-0.287328	-0.518466	0.123921	-0.677935	-0.402597	-1.14592	-0.5974	-0.318274	0.0271269	-1.09561	-0.189512	-0.764189	-0.274053	-0.0076973
0.75	0.338777	0.324309	1.60422	-0.0705665	0.259265	-0.147907	-0.958562	0.344905	-1.43367	-0.435322	-0.294996	-1.44024	-0.726884	-0.721662	-0.213393	-1.00484	-1.07282	-0.310881	-0.241515	-1.20695	-0.116749	-0.594308	-0.08562	-0.747492	-0.546803	-1.21243	-0.612116	-0.239789	-0.0455643	-1.25504	-0.277924	-0.911415	-0.300939	-0.101088
1	0.185599	0.0544781	0.66807	0.0397895	0.163187	-0.236746	-1.02212	-0.125042	-1.30776	-0.324399	-0.322116	-1.25052	-0.676408	-0.702923	-0.257691	-0.911413	-1.0185	-0.376785	-0.180715	-1.1014	0.0612212	-0.625585	-0.192691	-0.781232	-0.59751	-1.1195	-0.583802	-0.120191	-0.15888	-1.27586	-0.308752	-0.916645	-0.30669	-0.141563
1.25	0.29286	-0.125448	0.0923058	0.266972	0.0737329	-0.147579	-1.10498	-0.225561	-1.13883	-0.120975	-0.01429	-0.975203	-0.593848	-0.61846	-0.150915	-0.731365	-0.904119	-0.392231	-0.138154	-0.942963	0.00901657	-0.465391	-0.199996	-0.7519	-0.600669	-0.908664	-0.549772	0.0166937	-0.209781	-1.16604	-0.277924	-0.773247	-0.30669	-0.178456
1.5	0.57756	-0.038045	-0.122053	0.308337	-0.0440892	-0.068925	-1.20664	-0.225561	-0.956522	0.00951987	0.550244	-0.739733	-0.501473	-0.469494	-0.000365336	-0.560409	-0.796087	-0.442356	-0.0433754	-0.73804	-0.205948	-0.1535	-0.0952947	-0.634283	-0.571088	-0.66461	-0.557187	0.211684	-0.220668	-0.969078	-0.171872	-0.54987	-0.30669	-0.269947
1.75	0.554618	0.196157	-0.156008	0.135149	-0.217345	-0.116596	-1.27738	-0.225561	-0.85275	-0.120975	0.912388	-0.584886	-0.382987	-0.255413	0.0527537	-0.440499	-0.732728	-0.502482	0.242372	-0.490311	-0.360439	0.0701423	0.0825275	-0.473883	-0.469311	-0.473072	-0.582809	0.41676	-0.15888	-0.784914	-0.0592157	-0.364289	-0.20878	-0.328658
2	0.162657	0.291954	-0.12963	-0.0360605	-0.41275	-0.271246	-1.26427	-0.225561	-0.844342	-0.213477	0.550244	-0.499371	-0.16443	0.00269653	0.0964996	-0.323817	-0.661123	-0.529491	0.645822	-0.266596	-0.412633	0.0412911	0.255554	-0.365588	-0.31895	-0.367988	-0.566671	0.515615	-0.0455643	-0.672631	-0.0217933	-0.292451	0.00341654	-0.322851
2.25	-0.183387	0.223392	-0.177554	-0.0847243	-0.566863	-0.466721	-1.23426	-0.225561	-0.804094	-0.10143	-0.01429	-0.430624	0.153788	0.288471	0.265769	-0.211814	-0.59794	-0.502482	0.983799	-0.149496	-0.331703	-0.105989	0.283829	-0.364053	-0.259419	-0.31923	-0.499911	0.535331	0.0271269	-0.585715	-0.0283967	-0.279233	0.178456	-0.331312
2.5	-0.31359	0.108475	-0.213485	-0.0234412	-0.644852	-0.51643	-1.22772	0.0596721	-0.609891	0.00951987	-0.267876	-0.314245	0.429839	0.496984	0.372559	-0.130789	-0.56075	-0.40957	0.889532	-0.108481	-0.168943	-0.247131	0.204124	-0.394248	-0.271412	-0.28977	-0.427852	0.55157	-0.0455643	-0.481513	-0.0151993	-0.217154	0.134302	-0.347485
2.75	-0.206329	0.0544851	-0.176529	0.0398103	-0.623154	-0.329898	-1.26012	0.582771	-0.207653	-0.120975	-0.322116	-0.202132	0.562903	0.477495	0.256409	-0.0513657	-0.493145	-0.245302	0.456265	-0.0583747	-0.0645333	-0.288568	0.160068	-0.390313	-0.286027	-0.237597	-0.357862	0.416928	-0.15888	-0.366929	-0.0151993	-0.0708578	-0.0238003	-0.283296
3	0.162657	0.0855306	-0.134457	-0.064806	-0.476332	0.0545815	-1.30718	0.918335	0.137443	-0.324399	-0.322116	-0.121063	0.471804	0.255378	0.0527404	0.106777	-0.283537	-0.0922635	0.208891	0.0183627	-0.124568	-0.169241	0.14917	-0.329941	-0.279872	-0.170624	-0.311168	0.191782	-0.209781	-0.291369	-0.0283967	0.0919336	-0.0280061	-0.125553
3.25	0.554618	0.374202	-0.0406745	-0.216527	-0.28824	0.468158	-1.37923	0.582771	0.177156	-0.415777	-0.322116	-0.0714398	0.365188	0.180649	-0.0790627	0.30993	0.0532209	0.0118781	0.191202	0.126371	-0.161574	0.0577296	0.134196	-0.271762	-0.307148	-0.0623063	-0.263133	0.084681	-0.220668	-0.244627	-0.0151993	0.197544	0.101657	0.0105387
3.5	0.554618	0.710916	0.0601179	-0.243314	-0.201356	0.660261	-1.37988	0.0596721	-0.0507271	-0.435322	-0.322116	-0.0194187	0.379966	0.419464	-0.0977956	0.405289	0.274267	0.0392109	0.215564	0.275432	-0.1011	0.274709	0.0951007	-0.274635	-0.337093	0.0732163	-0.207331	0.0961825	-0.15888	-0.205605	-0.0151993	0.195417	0.211093	-0.00546819
3.75	0.162657	0.655338	0.153687	-0.182031	-0.2646	0.534995	-1.27045	-0.175302	-0.240461	-0.435322	-0.322116	-0.0331571	0.440984	0.801934	0.0964996	0.309271	0.221371	-0.0151304	0.22467	0.436554	-0.116738	0.371847	0.14299	-0.280703	-0.354873	0.23357	-0.153859	0.0900248	0.016224	-0.182488	-0.065819	0.0717351	0.107416	-0.136081
4	-0.183387	0.314313	0.199982	-0.133367	-0.37266	0.263036	-1.18807	-0.225561	-0.327393	-0.324399	-0.322116	-0.140944	0.380837	1.10782	0.478797	0.131989	0.0876698	-0.173622	0.17299	0.58143	-0.205948	0.351262	0.276426	-0.263596	-0.283222	0.370114	-0.175929	0.101154	0.202231	-0.218159	-0.0838295	-0.0864144	-0.0836536	-0.235117
4.25	-0.31359	0.214984	0.222345	-0.182031	-0.40682	0.163351	-1.14871	-0.225561	-0.437508	-0.120975	-0.168203	-0.31717	0.273755	1.21281	0.71739	0.0188546	0.114373	-0.371008	0.0782111	0.692535	-0.242504	0.180371	0.356204	-0.242324	-0.118568	0.378172	-0.238252	0.20653	0.264019	-0.272659	-0.0592251	-0.135247	-0.164311	-0.178623
4.5	-0.336532	0.303231	0.150317	-0.216527	-0.357451	0.272308	-1.03161	-0.225561	-0.4116	0.00951987	0.114064	-0.434158	0.225327	1.11491	0.619973	-0.00806579	0.209717	-0.458143	-0.0342691	0.700788	-0.145924	0.01072	0.24781	-0.194999	0.0347843	0.194009	-0.228919	0.285855	0.191328	-0.278951	0.0904737	-0.0640905	-0.104781	-0.064021
4.75	-0.336532	0.209127	0.0634774	-0.174743	-0.317942	0.433635	-0.743111	-0.225561	-0.0518096	-0.120975	0.295136	-0.45905	0.213374	0.917769	0.328247	-0.0250795	0.158077	-0.436579	-0.068248	0.578159	0.00118646	-0.0547719	0.0710498	-0.0658716	0.0434176	-0.0201036	-0.18123	0.270266	0.223379	-0.235598	0.265536	0.049683	0.0360531	0.0263832
5	-0.336532	0.00271046	0.0966314	-0.133367	-0.332324	0.642113	-0.367243	-0.225561	0.526007	-0.213477	0.114064	-0.422957	0.28238	0.727697	0.0621002	-0.0586526	0.00621395	-0.338214	-0.0859495	0.440576	0.14997	-0.0434481	-0.030059	0.157732	0.025092	-0.0635087	-0.0939614	0.337253	0.315531	-0.21265	0.315786	0.0953826	0.205334	0.106738
5.25	-0.336532	-0.11089	0.297348	-0.182031	-0.374902	0.769793	-0.170014	-0.225561	0.960637	-0.10143	-0.168203	-0.373653	0.39701	0.611274	-0.0790627	-0.102174	-0.126557	-0.223746	-0.0773543	0.338335	0.14259	0.010916	-0.0622652	0.339031	0.0951563	0.0607837	0.0401153	0.516624	0.336711	-0.259375	0.15288	0.0807262	0.303574	0.15775
5.5	-0.336532	-0.120586	0.563357	-0.257892	-0.385939	0.626489	-0.41907	-0.225561	1.02594	0.00951987	-0.294996	-0.345894	0.397948	0.501324	-0.0977956	-0.135934	-0.164004	-0.113819	-0.0342691	0.263157	0.105135	0.0732609	-0.0892055	0.408085	0.175635	0.186652	0.153102	0.597178	0.202216	-0.336739	-0.0464072	0.012793	0.259428	0.0831939
5.75	-0.336532	-0.0846787	0.700461	-0.250603	-0.331829	0.316126	-0.888082	-0.225561	0.837663	-0.120975	-0.322116	-0.311904	0.254582	0.356135	-0.00973847	-0.168536	-0.16977	-0.0537011	0.120785	0.189051	0.142579	0.139131	-0.183521	0.410495	0.181109	0.266392	0.13624	0.538414	0.0780123	-0.400155	-0.189512	-0.0526638	0.156982	-0.077536
6	-0.336532	-0.0150934	0.567154	-0.182031	-0.246503	0.0218727	-1.12939	-0.225561	0.686041	-0.102555	-0.322116	-0.299414	0.151832	0.241631	0.177725	-0.182378	-0.20484	-0.0266926	0.371129	0.101894	0.209994	0.146686	-0.33666	0.386102	0.163824	0.348091	0.12211	0.435056	0.0489016	-0.421155	-0.277924	-0.0578656	0.0149179	-0.184109
6.25	-0.336532	-0.0245173	0.412671	-0.133367	-0.218151	-0.17638	-1.0676	-0.225561	0.576673	0.212916	-0.322116	-0.314414	0.182146	0.218897	0.238214	-0.193159	-0.242685	-0.0093535	0.517601	-0.0167796	0.0903855	0.0322024	-0.447448	0.342584	0.0858417	0.417395	0.21131	0.27968	-0.0455643	-0.397535	-0.27133	-0.0115249	-0.104781	-0.204991
6.5	-0.336532	-0.102768	0.474162	-0.182031	-0.249375	-0.100396	-0.90407	-0.225561	0.278163	0.565284	-0.322116	-0.321656	0.240467	0.240837	0.168365	-0.240037	-0.261649	-0.0209156	0.380249	-0.101605	-0.109369	0.0196031	-0.445863	0.247913	-0.0310883	0.40873	0.376318	0.177387	-0.15888	-0.373094	-0.209294	0.00658298	-0.137425	-0.272605
6.75	-0.336532	-0.152955	0.646994	-0.257892	-0.261591	0.220665	-0.678259	-0.225561	0.0117849	0.507718	-0.168203	-0.271696	0.276319	0.282566	0.00898114	-0.311131	-0.297794	0.0118699	0.0174114	-0.112085	-0.226866	0.162408	-0.386312	0.134714	-0.0881367	0.361864	0.431228	0.186805	-0.209781	-0.362862	-0.165268	-0.0474699	-0.0564368	-0.325996
7	-0.336532	-0.0979204	0.61047	-0.250603	-0.201794	0.690071	-0.274601	-0.225561	-0.0352955	0.342286	0.114064	-0.198584	0.367009	0.334993	-0.107155	-0.360361	-0.357833	0.0835585	-0.2664	-0.104463	-0.205948	0.240308	-0.320274	0.0751407	0.0166318	0.388132	0.209963	0.206535	-0.220668	-0.353329	-0.209294	-0.132386	0.118595	-0.299144
7.25	-0.336532	-0.0245173	0.379954	-0.0579369	-0.123597	0.967982	0.174326	-0.225561	0.147212	0.232461	0.295136	-0.152918	0.506636	0.403795	-0.0790627	-0.340436	-0.442983	0.143352	-0.318081	-0.102186	-0.0645445	0.101401	-0.274035	0.0703857	0.15786	0.479252	-0.0825902	0.244383	-0.220668	-0.347813	-0.277924	-0.204618	0.226792	-0.200267
7.5	-0.336532	-0.0474551	0.208376	0.218308	-0.0775503	0.943448	0.336718	-0.225561	0.44399	0.120442	0.114064	-0.155692	0.499679	0.422116	-0.0628575	-0.281357	-0.490656	0.164908	-0.241515	-0.0744542	0.00901657	-0.0362849	-0.197434	0.047702	0.187264	0.537895	-0.179886	0.305567	-0.15888	-0.394096	-0.27133	-0.267015	0.23797	-0.163049
7.75	-0.336532	-0.185316	0.161493	0.357001	-0.0741103	0.498318	0.255071	-0.225561	0.746912	-0.10143	-0.168203	-0.16059	0.373274	0.333297	-0.0977823	-0.226747	-0.421874	0.253271	-0.180715	-0.0420868	-0.0723634	-0.0399423	-0.074411	-0.00909521	0.112259	0.475474	-0.0875578	0.320802	-0.0455643	-0.474466	-0.171872	-0.285365	0.17844	-0.10987
8	-0.336532	-0.25872	0.1539	0.211009	-0.0742204	-0.0344707	0.319686	-0.225561	0.877474	-0.324399	-0.294996	-0.115108	0.237377	0.155176	-0.204034	-0.190397	-0.240819	0.323724	-0.241515	-0.0669401	-0.242504	0.127438	0.0617394	-0.0806865	0.0831679	0.338592	-0.00974532	0.20653	0.0271269	-0.510039	-0.0592157	-0.209447	0.112836	-0.0081384
8.25	-0.336532	-0.0979273	0.10321	-0.00198435	-0.0384518	-0.29374	0.612052	-0.225561	0.730902	-0.193932	-0.322116	-0.0883205	0.0839139	0.0104383	-0.257691	-0.142052	-0.0864938	0.313406	-0.336294	-0.140174	-0.368258	0.17411	0.119067	-0.130187	0.10063	0.216542	-0.0323077	0.104233	-0.0455643	-0.474685	-0.0217933	-0.0975531	0.118586	0.0753358
8.5	-0.336532	0.158947	0.0102344	-0.1188	0.0181556	-0.255621	0.836487	-0.225561	0.458933	0.193371	-0.322116	-0.119267	-0.0897363	-0.0461382	-0.204034	-0.0745848	-0.0766646	0.110891	-0.378868	-0.190544	-0.412633	0.00408132	0.0336394	-0.139911	0.157496	0.179811	-0.0835089	0.137287	-0.15888	-0.432096	-0.0283967	-0.0293348	0.140053	0.0530685
8.75	-0.336532	0.306226	-0.144613	-0.0993017	0.0464243	-0.113659	0.702046	-0.225561	0.276247	0.565284	-0.322116	-0.206675	-0.225407	-0.055164	-0.150901	-0.010121	-0.142402	-0.173954	-0.387974	-0.180664	-0.420452	-0.26933	-0.125318	-0.0862107	0.19377	0.243635	-0.0987697	0.206535	-0.0862045	-0.431013	-0.0151993	-0.019568	0.118595	0.042386
9	-0.336532	0.22721	-0.245406	-0.00885354	-0.0092716	-0.00593717	0.333173	-0.225561	0.230007	0.507718	-0.322116	-0.248449	-0.256192	-0.0612681	-0.213393	0.0234971	-0.193222	-0.353677	-0.284613	-0.178579	-0.376077	-0.379955	-0.204411	-0.00961016	0.115432	0.341115	-0.028711	0.238403	0.12954	-0.460806	-0.0526217	-0.0329651	0.0418038	0.035931
9.25	-0.336532	0.0771507	-0.166383	-0.0161422	-0.150032	0.00737867	-0.118252	-0.225561	0.233136	0.231364	-0.168203	-0.167117	-0.150681	-0.0707052	-0.31081	0.00269375	-0.207479	-0.403793	0.00830508	-0.200008	-0.294697	-0.265996	-0.183525	0.00840121	-0.00680325	0.416011	0.0659106	0.262034	0.336711	-0.501376	-0.171872	-0.0695841	0.0203459	-0.0858351
9.5	-0.336532	-0.120314	0.0206093	-0.140666	-0.260563	-0.0107567	-0.435275	-0.225561	0.215403	-0.0818852	0.114064	-0.0623814	-0.00132745	-0.0789285	-0.35457	-0.0500498	-0.203978	-0.332437	0.319462	-0.209	-0.198118	-0.13463	-0.180779	-0.051209	-0.133365	0.385205	0.0581329	0.329025	0.304644	-0.545063	-0.27133	-0.0887743	0.0206768	-0.171085
9.75	-0.336532	-0.236054	0.0854712	-0.209238	-0.250158	-0.113503	-0.555731	-0.225561	0.168265	-0.324399	0.295136	-0.0386101	0.0540749	-0.0475047	-0.363929	-0.0979022	-0.221956	-0.223746	0.319462	-0.21596	-0.168943	-0.11577	-0.282586	-0.159169	-0.213336	0.236228	-0.0699104	0.361252	0.150704	-0.566333	-0.308752	-0.0520665	-0.0506779	-0.130278
10	-0.336532	-0.17562	-0.0733969	-0.092013	-0.15266	-0.234425	-0.387166	-0.225561	0.191609	-0.415777	0.114064	-0.0712588	-0.0304836	-0.0411192	-0.363929	-0.115047	-0.267074	-0.146605	0.00830508	-0.264634	-0.153743	-0.206966	-0.417766	-0.259332	-0.339902	0.0494202	-0.262948	0.2682	-0.0237896	-0.547201	-0.240502	0.00274563	-0.175813	-0.0933725
10.25	-0.336532	-0.0199414	-0.241609	0.142448	-0.0747949	-0.272009	-0.0758642	-0.225561	0.308175	-0.435322	-0.168203	-0.0982495	-0.215843	-0.151538	-0.363929	-0.119269	-0.255439	-0.212184	-0.2664	-0.323959	-0.116749	-0.244185	-0.438467	-0.298393	-0.427246	-0.0672626	-0.407128	0.136274	-0.15888	-0.503166	-0.065819	-0.00375883	-0.203029	-0.131198
10.5	-0.336532	0.131148	-0.288285	0.266972	-0.024177	-0.229286	0.130758	-0.225561	0.413284	-0.435322	-0.294996	-0.0857216	-0.382301	-0.323047	-0.31081	-0.134008	-0.169082	-0.343999	-0.318081	-0.361223	-0.0279889	-0.232297	-0.351452	-0.282301	-0.41739	-0.0653884	-0.450808	0.215413	-0.147993	-0.461258	0.0908626	-0.0626911	-0.115959	-0.0908847
10.75	-0.206329	0.213975	-0.205886	0.142448	0.0333394	-0.31303	0.13758	-0.225561	0.435922	-0.435322	-0.322116	-0.00548088	-0.387081	-0.409065	-0.213393	-0.141019	-0.0713328	-0.29966	-0.189834	-0.337314	0.0612101	-0.187385	-0.27403	-0.259629	-0.394128	0.0179897	-0.409601	0.437485	-0.0455643	-0.411761	0.0842592	-0.107563	-0.044919	0.061538
11	0.0324544	0.12304	-0.112692	-0.0506482	0.163224	-0.533717	0.135957	-0.225561	0.37747	-0.435322	-0.168203	0.122219	-0.258601	-0.377352	-0.150901	-0.128109	0.00111827	-0.119272	0.120785	-0.273748	0.0977656	-0.251162	-0.245505	-0.190408	-0.340262	0.129587	-0.356613	0.527112	0.0271269	-0.352971	0.00902566	-0.144419	-0.0890733	0.176585
11.25	0.185632	-0.157803	-0.0622151	-0.126089	0.353563	-0.526812	0.343596	-0.225561	0.234192	-0.324399	0.114064	0.240949	-0.155652	-0.321762	-0.107155	-0.0743668	0.0876229	-0.0151222	0.405121	-0.185685	0.0612101	-0.329808	-0.222796	-0.0678878	-0.223509	0.182909	-0.321833	0.45993	-0.0455643	-0.297003	0.028817	-0.218513	-0.0836536	0.133273
11.5	0.0324544	-0.364212	-0.0873499	-0.126079	0.491108	-0.276652	0.688151	-0.225561	0.0593929	-0.120975	0.295136	0.255432	-0.164282	-0.350498	0.0433806	-0.0292422	0.0900303	-0.0980487	0.483622	-0.0880708	0.0242045	-0.341652	-0.153932	0.0676523	-0.0490407	0.187173	-0.205044	0.419648	-0.15888	-0.254869	0.128276	-0.300043	0.118586	0.0960476
11.75	-0.206329	-0.331565	-0.0801885	-0.140666	0.52424	-0.0642577	0.860295	-0.225561	0.0333766	0.00951987	0.114064	0.167226	-0.217544	-0.414463	0.222023	-0.0781258	-0.00468465	-0.20674	0.258649	-0.01633	0.00900544	-0.282808	-0.0220149	0.154999	0.0879736	0.213347	-0.00780926	0.478412	-0.209781	-0.217461	0.265156	-0.288613	0.325041	0.134193
12	-0.31359	-0.212823	-0.0224934	-0.0993017	0.487697	-0.0820808	0.710176	-0.225561	0.26689	-0.120975	-0.168203	0.0396354	-0.223187	-0.382549	0.150171	-0.23107	-0.170762	-0.293542	0.0351129	-0.0269266	-0.0123398	-0.143719	0.0904488	0.206043	0.259092	0.300549	0.135974	0.495235	-0.15888	-0.197518	0.346984	-0.153648	0.336219	0.0831979
12.25	-0.336532	-0.162644	0.0279893	0.0325113	0.419557	-0.206236	0.420694	-0.225561	0.60007	-0.324399	-0.294996	-0.0661474	-0.166504	-0.261968	-0.107155	-0.346046	-0.26183	-0.311214	0.0873045	-0.0958896	-0.161124	-0.00884653	0.120468	0.220567	0.436407	0.414364	0.0717267	0.419657	-0.0455643	-0.22045	0.278354	0.00787776	0.16693	-0.125557
12.5	-0.336532	-0.135137	-0.00474395	0.183813	0.369114	-0.247868	0.235818	-0.225561	0.697972	-0.304854	-0.322116	-0.113647	-0.098628	-0.181442	-0.238972	-0.354111	-0.27062	-0.217969	0.310343	-0.148992	-0.331703	0.114324	0.0544275	0.183104	0.523037	0.491924	-0.0648703	0.262207	0.0889152	-0.265216	0.159095	0.0958352	0.0587331	-0.309835
12.75	-0.336532	-0.0749757	0.00241747	0.301038	0.365445	-0.19975	0.249981	-0.225561	0.520321	-0.0100529	-0.322116	-0.0652897	-0.11282	-0.161388	-0.150915	-0.350709	-0.31856	-0.102257	0.441048	-0.137767	-0.360439	0.214781	-0.0274945	0.121787	0.454364	0.517836	-0.111938	0.168978	0.191328	-0.276089	0.13487	0.080985	0.0917006	-0.298545
13	-0.336532	0.039934	0.0892569	0.315626	0.360317	-0.282806	0.439359	0.0596721	0.307079	0.434789	-0.322116	0.00695109	-0.195734	-0.167965	0.158992	-0.36732	-0.385846	-0.16362	0.249543	-0.0662217	-0.294697	0.356821	-0.0802314	0.106874	0.340594	0.491838	-0.123006	0.209605	0.325808	-0.240649	0.104051	0.0407931	0.134302	-0.192404
13.25	-0.206329	0.231779	0.171655	0.149736	0.295723	-0.376974	0.659024	0.582771	0.215221	0.638213	-0.322116	0.0344871	-0.210278	-0.0999346	0.451243	-0.345336	-0.401878	-0.305428	0.0351129	-0.0209389	-0.242492	0.460799	-0.0174497	0.152414	0.265775	0.437159	-0.161102	0.349586	0.450011	-0.185391	-0.065819	0.0132902	0.151231	-0.112362
13.5	0.162657	0.439504	0.207362	-0.0506482	0.207717	-0.313961	0.874871	0.918335	0.252823	0.434789	-0.322116	0.0497255	-0.134362	0.0338456	0.585048	-0.26687	-0.354944	-0.425025	-0.0677369	-0.0524472	-0.294697	0.391614	0.201473	0.195195	0.185132	0.392364	-0.225347	0.480664	0.439124	-0.133069	-0.196485	0.00140099	0.134294	-0.0670078
13.75	0.554618	0.361811	0.211164	-0.0847243	0.142706	-0.0348859	0.990632	0.582771	0.256447	0.00949203	-0.322116	0.113046	-0.047737	0.136464	0.504348	-0.200047	-0.316966	-0.469697	-0.129035	-0.0996742	-0.287328	0.121159	0.427469	0.143944	0.00202108	0.352917	-0.219327	0.541498	0.274907	-0.104918	-0.196106	-0.0101432	0.151231	-0.00281405
14	0.554618	0.0528898	0.139953	0.0738761	0.0786581	0.216021	0.947211	0.0596721	0.187724	-0.304854	-0.168203	0.156941	0.057421	0.172346	0.38138	-0.147162	-0.270825	-0.436579	-0.180728	-0.0582857	-0.116749	-0.19719	0.486536	0.0737505	-0.178285	0.296271	-0.205778	0.545408	0.0888997	-0.114569	-0.165268	-0.00587501	0.145803	0.0538383
14.25	0.29286	-0.0655725	0.041926	0.259673	-0.0351981	0.196384	0.699929	-0.175302	0.0943465	-0.415777	0.114064	0.118179	0.200468	0.187571	0.231369	-0.0702994	-0.147008	-0.338214	-0.189834	0.0586845	0.0612212	-0.404193	0.404898	0.096273	-0.201538	0.236287	-0.226285	0.498133	0.0271114	-0.137224	-0.134449	-0.00569961	0.0744485	0.0585552
14.5	0.185599	0.0822778	0.0421445	0.308337	-0.151725	-0.0263856	0.566395	-0.225561	-0.0317163	-0.435322	0.295136	0.0437134	0.292019	0.188716	0.0433806	0.019973	0.101941	-0.190961	-0.171609	0.156175	0.00901657	-0.52755	0.406908	0.236345	-0.106085	0.15387	-0.25771	0.434224	0.0380143	-0.112725	-0.065819	0.029364	-0.0391765	0.14141
14.75	0.208574	0.10392	0.0611486	0.149736	-0.131276	-0.328987	0.804009	-0.225561	-0.0748597	-0.435322	0.114064	-0.00445093	0.341631	0.121498	0.0271754	0.0668545	0.306454	-0.0209074	-0.241515	0.187798	-0.205948	-0.556583	0.509757	0.399108	-0.0106353	0.0203635	-0.287681	0.326955	-0.0455643	-0.0311152	0.0662487	0.0841116	-0.110539	0.315485
15	0.0324544	-0.0801028	-0.0265084	-0.00928339	0.0459516	-0.500649	1.15262	-0.225561	0.0188264	-0.435322	-0.168203	-0.010209	0.394716	0.0280609	0.150157	0.0165855	0.319065	0.044996	-0.284613	0.1908	-0.360439	-0.424142	0.508477	0.467343	0.0316112	-0.129879	-0.31175	0.153929	-0.15888	0.0899305	0.146286	0.0758499	-0.0180496	0.4117

## Sheet: Fig 5 fig suppl 2Biii
FA poke onset (sec)	Up		Down
-7	-0.272293	-0.404066	-0.0612613	0.227538	0.489374	-0.139572	-0.435322	0.22039	0.00424452	0.333033	-0.347687	-0.274297	0.03006	-0.299557	-0.235165	-0.108446	0.0951466	-0.303044	-0.412389	-0.237547	-0.220668	-0.108227	-0.234265	-0.145616	-0.26215	-0.30669
-6.75	-0.336532	-0.335857	-0.0111614	0.423272	0.279647	-0.0952089	-0.435322	0.0997679	0.0143978	0.397467	-0.411933	-0.308069	0.0609184	-0.174943	-0.252786	-0.204071	0.0297679	-0.303044	-0.451353	-0.334782	-0.220668	-0.0545391	-0.085566	0.136151	-0.0688834	-0.30669
-6.5	-0.154248	-0.263299	0.0689974	0.439005	-0.0472903	-0.193137	-0.435322	0.0256796	-0.0193254	0.242155	-0.438217	-0.265027	0.165193	-0.0113351	-0.261363	-0.0432472	-0.149291	-0.303044	-0.477936	-0.363572	-0.0867938	-0.0530784	0.0098231	0.316903	0.0795958	-0.30669
-6.25	0.180049	-0.247035	0.0313587	0.421377	-0.194149	-0.328307	-0.435322	0.0501422	-0.140849	-0.0540897	-0.358114	-0.0707085	0.238113	0.0380888	-0.299697	0.161792	-0.247164	-0.303044	-0.426056	-0.316189	0.158724	-0.11889	-0.085566	0.136151	0.223192	-0.30669
-6	0.394498	-0.315252	-0.0339246	0.449661	-0.225561	-0.387956	-0.280031	0.133448	-0.267846	-0.273051	-0.22668	0.254011	0.0529992	-0.0113351	-0.413605	0.128295	-0.312143	-0.20767	-0.315662	-0.255415	0.316222	-0.225204	-0.234265	-0.145616	0.334614	-0.185468
-5.75	0.180049	-0.25289	0.0914667	0.379029	-0.225561	-0.388499	0.00476344	0.147925	-0.28094	-0.350315	-0.118599	0.546875	-0.192553	-0.0865255	-0.529127	-0.0325125	-0.498143	0.0626127	-0.244082	-0.23119	0.158724	-0.258603	-0.30106	-0.272184	0.266945	0.0368442
-5.5	-0.154248	-0.00641645	0.28082	0.170407	-0.225561	-0.348818	0.187456	0.100057	-0.158139	-0.363929	-0.0536752	0.589742	-0.279538	-0.099771	-0.504439	-0.21479	-0.596425	0.349725	-0.250545	-0.189188	-0.0867938	-0.138029	-0.234265	-0.299256	0.114355	0.179456
-5.25	-0.304413	0.150623	0.206096	-0.00910577	-0.225561	-0.254218	0.00476344	0.0547825	-0.0167946	-0.363929	-0.0475216	0.373974	-0.169602	-0.0732611	-0.350861	-0.355907	-0.444797	0.349725	-0.268657	-0.0748295	-0.197079	0.0422358	-0.085566	-0.299256	0.157336	0.0368442
-5	-0.336532	-0.0174608	-0.0975925	-0.0579573	-0.225561	-0.146311	-0.280031	-0.0299932	0.0787943	-0.363929	-0.085851	0.199672	0.0384628	-0.174943	-0.257354	-0.344534	-0.22121	0.0626127	-0.245044	0.107488	-0.0867938	0.162024	0.0098231	-0.299256	0.385532	-0.185468
-4.75	-0.336532	-0.278708	-0.286672	0.0198272	-0.225561	-0.151674	-0.407959	-0.14597	0.0425022	-0.363929	-0.0881527	0.277598	0.109102	-0.237631	-0.337303	-0.237536	-0.102876	-0.190865	-0.220748	0.294274	0.158724	0.179929	-0.00448421	-0.299256	0.530027	-0.28533
-4.5	-0.336532	-0.3875	-0.0975994	0.148999	-0.225561	-0.262142	-0.435322	-0.230757	-0.105663	-0.286665	-0.0611263	0.528926	0.0693332	-0.161697	-0.456228	-0.0325125	-0.0839026	-0.286238	-0.159594	0.450772	0.316222	0.128843	-0.00448421	-0.299256	0.586033	-0.30669
-4.25	-0.336532	-0.335857	0.220705	0.351945	-0.225561	-0.38272	-0.435322	-0.231341	-0.325523	-0.144968	-0.0577459	0.645348	-0.00923709	-0.0113351	-0.442433	0.128295	-0.00312639	-0.303044	-0.0145201	0.533789	0.158724	0.0740732	0.105192	-0.299256	0.670501	-0.30669
-4	-0.336532	-0.263299	0.344221	0.631049	-0.225561	-0.479359	-0.435322	-0.201918	-0.463885	-0.0540703	-0.0733769	0.51068	-0.105097	0.0380888	-0.273982	0.161792	0.0487418	-0.303044	0.237128	0.466961	-0.0867938	0.0825002	0.144215	-0.299256	0.705139	-0.185468
-3.75	-0.336532	-0.184355	0.284086	0.843971	-0.225561	-0.53299	-0.435322	-0.292782	-0.416155	0.00956007	-0.035355	0.322931	-0.208887	-0.0113351	-0.0191961	-0.0432472	0.0877963	-0.20767	0.437912	0.25885	-0.197079	0.168591	0.0909048	-0.299256	0.616467	0.0368442
-3.5	0.0280358	-0.137623	0.184367	0.813947	-0.225561	-0.464292	-0.435322	-0.395409	-0.254569	0.151257	0.098515	0.209843	-0.192553	0.0638176	0.28306	-0.291362	0.0626523	-0.0327608	0.5183	0.0374384	-0.220668	0.300594	0.00980275	-0.299256	0.414245	0.179456
-3.25	0.696629	-0.0955408	-0.0141609	0.621799	0.13098	-0.34066	-0.435322	-0.269605	-0.100442	0.346667	0.254895	0.0868622	-0.0260547	0.326292	0.505432	-0.397705	-0.135371	0.0794419	0.645649	-0.0888645	-0.220668	0.449945	0.0765975	-0.299256	0.196869	0.0368442
-3	1.12553	-0.0952309	-0.190493	0.427759	0.963125	-0.318873	-0.435322	0.0614323	0.0257739	0.370219	0.331041	-0.0479389	0.212893	0.529674	0.54235	-0.355907	-0.287019	-0.0327608	0.817743	-0.0877935	-0.220668	0.566282	0.253891	-0.299256	0.182243	-0.185468
-2.75	1.0612	-0.101071	-0.092732	0.278517	1.70952	-0.398182	-0.435322	0.354131	0.163659	0.319419	0.305295	0.0280468	0.35644	0.401463	0.457149	-0.237536	-0.22123	-0.20767	0.859403	-0.0431093	-0.220668	0.606369	0.239604	-0.145616	0.401852	-0.28533
-2.5	1.42576	-0.0638913	0.303289	0.295801	1.67806	-0.315413	-0.435322	0.499557	0.255972	0.19212	0.278188	0.249366	0.38731	0.338775	0.49141	0.161122	-0.1145	-0.190865	0.728784	-0.0529569	-0.220668	0.644606	-0.00448421	0.136151	0.59809	-0.30669
-2.25	2.22293	0.0301354	0.657637	0.411825	1.31967	-0.0377656	-0.435322	0.51509	0.27947	0.00956007	0.324245	0.446325	0.412531	0.5429	0.64865	0.677042	-0.156242	-0.0327608	0.59107	-0.12315	-0.0867938	0.666705	-0.219978	0.316903	0.58095	-0.30669
-2	2.15869	0.202234	0.713926	0.460262	1.23568	0.203051	-0.435322	0.432339	0.256241	-0.0540897	0.424619	0.542837	0.317155	0.552588	0.748295	1.06743	-0.0773523	0.174816	0.622531	-0.0923995	0.292599	0.595663	-0.30106	0.136151	0.435432	-0.185468
-1.75	1.0612	0.359584	0.478012	0.357495	1.02599	0.335513	-0.435322	0.321935	0.184853	-0.0404561	0.529795	0.576445	0.077736	0.276868	0.688038	0.871331	0.241302	0.332895	0.679669	0.141798	0.695614	0.523439	-0.315346	-0.145616	0.29421	0.158066
-1.5	0.0922741	0.281821	0.372859	0.216623	0.457917	0.543229	-0.435322	0.254503	0.147366	-0.067704	0.579975	0.62562	-0.152797	-0.0732799	0.582001	0.419971	0.416597	0.540472	0.56988	0.467155	0.695614	0.640505	-0.234265	-0.272184	0.215358	0.52299
-1.25	-0.272293	-0.0749435	0.369112	0.119268	0.162392	0.844782	-0.280031	0.251688	0.174232	0.0868241	0.545263	0.655975	-0.136463	-0.299557	0.490747	0.131334	0.476102	0.732186	0.404385	0.644516	0.292599	0.939901	-0.085566	-0.145616	0.142727	0.52299
-1	-0.154248	-0.325138	0.202263	0.0513757	0.311059	1.00881	0.315346	0.228444	0.173719	0.397467	0.466702	0.690954	0.061402	-0.374728	0.365066	0.0744692	0.444398	0.715381	0.406042	0.555145	-0.0632045	1.17283	0.0909048	0.136151	0.0414735	0.158066
-0.75	0.362333	-0.298685	-0.111935	0.000170736	0.489374	0.96812	1.06763	0.16366	0.048089	0.47475	0.428858	0.813285	0.221307	-0.387974	0.153557	0.313628	0.266846	0.461903	0.509707	0.2491	-0.197079	1.17791	0.144215	0.316903	0.0466574	0.0783344
-0.5	0.911078	-0.00152201	-0.19892	-0.135364	0.279647	0.766246	1.25032	-0.0138081	-0.0610306	0.151257	0.397335	0.890497	0.0698168	-0.387974	-0.114139	0.623216	-0.102496	0.174792	0.470249	-0.0833276	-0.0867938	1.01512	0.0909048	0.136151	0.149583	0.401738
-0.25	1.27565	0.588514	-0.064541	-0.223335	0.13098	0.314158	0.755431	-0.276623	-0.0796012	-0.195787	0.237422	0.745296	-0.209371	-0.387974	-0.333181	0.851018	-0.391842	0.079418	0.193956	-0.366516	0.158724	0.78945	0.00980275	-0.145616	0.20869	0.665601
0	1.76006	1.30054	-0.00599996	-0.294397	0.311059	-0.418404	0.342709	-0.437376	-0.0916622	-0.336701	-0.0710245	0.291469	-0.327226	-0.387974	-0.388039	0.668741	-0.509786	0.191621	-0.116219	-0.570875	0.316222	0.525491	-0.00448421	-0.272184	0.0985095	0.380378
0.25	2.55538	1.53194	-0.139545	-0.489221	0.489374	-1.10449	0.242182	-0.445976	-0.177151	-0.363929	-0.296645	-0.153674	-0.287929	-0.387974	-0.350647	0.139014	-0.524077	0.237522	-0.305897	-0.603211	0.158724	0.28506	0.02411	-0.299256	-0.22931	-0.0642468
0.5	2.88967	0.997224	-0.231411	-0.813118	0.279647	-1.38104	0.00476344	-0.409528	-0.329657	-0.363929	-0.218934	-0.251975	-0.264978	-0.387974	-0.368624	-0.192698	-0.491192	0.174816	-0.40586	-0.42601	-0.0867938	0.183214	-0.085566	-0.299256	-0.507787	-0.26397
0.75	2.30881	0.260859	-0.162309	-1.16182	-0.0472903	-1.2808	-0.280031	-0.414059	-0.448548	-0.363929	0.0682463	-0.0717037	-0.296332	-0.237631	-0.477287	-0.21479	-0.372848	-0.0159556	-0.39503	-0.173845	-0.197079	0.103522	-0.234265	-0.299256	-0.486503	-0.30669
1	1.52217	-0.108846	0.0408203	-1.38591	-0.194149	-1.03751	-0.407959	-0.439614	-0.449554	-0.363929	0.31204	0.122194	-0.39172	0.0380888	-0.561125	-0.161602	-0.102886	-0.20767	-0.277301	-0.00381366	-0.220668	-0.0221853	-0.30106	-0.299256	-0.295559	-0.30669
1.25	0.943152	-0.173001	0.173591	-1.43795	-0.225561	-0.813657	-0.435322	-0.440373	-0.34509	-0.363929	0.386016	0.144446	-0.392204	0.290132	-0.516456	-0.237536	0.19303	-0.286238	-0.12912	0.019169	-0.220668	-0.0829299	-0.234265	-0.299256	-0.248405	-0.30669
1.5	0.791184	-0.101071	0.192521	-1.38653	-0.225561	-0.652055	-0.435322	-0.374945	-0.187998	-0.363929	0.38701	0.0838048	-0.208887	0.25112	-0.330494	-0.355907	0.332234	-0.303044	0.00423104	-0.0128765	-0.220668	-0.0454916	-0.00448421	-0.299256	-0.380773	-0.185468
1.75	0.728749	0.019401	0.00887551	-1.30538	-0.225561	-0.557671	-0.435322	-0.215493	-0.0377794	-0.363929	0.46277	0.0884386	-0.0176279	0.0638365	-0.0777161	-0.409079	0.19302	-0.303044	0.118317	0.0539024	-0.220668	-0.0437295	0.239604	-0.299256	-0.454056	0.0368442
2	0.576781	0.12448	-0.236278	-1.27029	-0.225561	-0.565648	-0.435322	-0.0340626	0.0624681	-0.363929	0.595174	0.171748	-0.0260427	-0.148451	0.101865	-0.420452	-0.0495312	-0.303044	0.1965	0.242224	-0.0867938	-0.147528	0.239604	-0.299256	-0.377123	0.179456
2.25	0.212168	0.170895	-0.29126	-1.31865	-0.225561	-0.620927	-0.435322	0.0295749	0.0503784	-0.286665	0.630742	0.237518	-0.0742263	-0.237631	0.136261	-0.355907	-0.233264	-0.303044	0.188809	0.407452	0.158724	-0.266019	-0.00448421	-0.299256	-0.24622	0.0368442
2.5	-0.154248	0.176425	-0.120342	-1.43048	-0.225561	-0.631899	-0.435322	-0.0486118	-0.0574323	-0.144968	0.516775	0.225795	0.0384509	-0.161697	0.0919717	-0.172991	-0.22163	-0.303044	0.107689	0.431561	0.316222	-0.27556	-0.138896	-0.299256	-0.207465	-0.185468
2.75	0.0601549	0.135524	-0.0333505	-1.51964	-0.225561	-0.596063	-0.435322	-0.150478	-0.135264	-0.0540703	0.359381	0.161149	0.173608	-0.0865066	0.0410123	0.279493	-0.0560816	-0.20767	-0.019843	0.38531	0.158724	-0.183091	0.00980275	-0.299256	-0.234146	-0.28533
3	0.696629	0.0765502	-0.084571	-1.55848	-0.225561	-0.53561	-0.435322	-0.187247	-0.106618	-0.144968	0.298428	0.0700842	0.15679	-0.099771	-0.0108834	0.752976	-0.0560717	-0.0327608	-0.113952	0.364818	0.0470809	-0.0760811	0.239604	-0.299256	-0.277294	-0.30669
3.25	1.12553	0.187151	-0.134685	-1.57336	-0.225561	-0.46538	-0.435322	-0.144154	-0.0126175	-0.209401	0.324968	0.0640422	0.0300481	-0.099771	-0.0724968	0.862407	-0.346914	0.0794419	-0.168016	0.330802	0.316188	-0.00112847	0.239604	-0.299256	-0.335547	-0.30669
3.5	0.696629	0.339288	-0.120342	-1.50872	-0.225561	-0.386781	-0.435322	0.0322312	0.10341	-0.131354	0.317809	0.169248	-0.144382	-0.0732611	-0.139172	0.387129	-0.589475	0.0626127	-0.240168	0.272297	0.695614	0.0950878	-0.00448421	-0.299256	-0.405585	-0.30669
3.75	0.0280358	0.265247	-0.0794304	-1.33101	-0.225561	-0.307157	-0.435322	0.226233	0.184371	-0.0540703	0.302812	0.373029	-0.344032	-0.174943	-0.163884	-0.0218101	-0.589075	0.0626127	-0.344155	0.220503	0.695614	0.24935	-0.219978	-0.299256	-0.382449	-0.30669
4	-0.272293	0.0928068	0.0443663	-1.10608	-0.225561	-0.163622	-0.435322	0.23938	0.194257	-0.144968	0.346853	0.608845	-0.383801	-0.237631	-0.153829	0.184506	-0.412293	0.191621	-0.446556	0.136733	0.292599	0.363751	-0.30106	-0.299256	-0.278012	-0.30669
4.25	-0.336532	0.0249153	0.119665	-0.928285	-0.225561	0.0161521	-0.435322	0.0969064	0.126401	-0.286665	0.3939	0.762126	-0.256575	-0.161697	-0.164091	0.839629	-0.188726	0.237522	-0.538257	0.0118002	0.0706702	0.317523	-0.315346	-0.299256	-0.253545	-0.30669
4.5	-0.336532	0.0209002	-0.0745491	-0.796965	-0.225561	0.157686	-0.435322	0.0968897	0.088456	-0.195787	0.41043	0.727998	-0.152773	-0.0865066	-0.176353	1.39977	-0.0305376	0.270189	-0.560716	-0.0695377	0.182313	0.0974817	-0.234265	-0.299256	-0.341115	-0.30669
4.75	-0.154248	-0.106283	-0.361397	-0.648	-0.225561	0.204228	-0.280031	0.286425	0.162916	0.228522	0.410358	0.474633	-0.169602	-0.174943	-0.203481	1.39977	0.0947466	0.254327	-0.498864	-0.0322038	0.316222	-0.209619	-0.00448421	-0.145616	-0.391794	-0.30669
5	0.180049	-0.226755	-0.355208	-0.55307	-0.225561	0.157252	0.00476344	0.457963	0.297709	0.693712	0.374149	0.270945	-0.169602	-0.162459	-0.24355	0.92692	0.232464	0.174816	-0.394947	0.0794995	0.158724	-0.439369	0.239604	0.289792	-0.326901	-0.30669
5.25	0.394498	-0.256285	-0.180184	-0.555563	-0.225561	0.0559046	0.342748	0.418179	0.3885	0.693712	0.336633	0.306681	-0.040591	0.0513344	-0.238171	0.356049	0.378629	-0.0159556	-0.330913	0.171788	-0.0867938	-0.463779	0.239604	0.752311	-0.174777	-0.30669
5.5	0.180049	-0.320774	-0.121649	-0.625606	-0.225561	-0.0192617	0.444848	0.256413	0.325404	0.228522	0.336574	0.445994	0.0529992	0.290132	-0.207803	0.0661514	0.318714	-0.20767	-0.33935	0.213225	-0.197079	-0.314478	-0.00448421	0.752311	0.0250395	-0.30669
5.75	-0.154248	-0.346909	-0.107334	-0.595089	-0.225561	-0.0420683	0.342748	0.200342	0.158163	-0.182173	0.379658	0.526607	0.077748	0.25112	-0.229611	-0.0318742	0.0947466	-0.286238	-0.361389	0.212289	-0.220668	-0.202916	-0.219978	0.289792	0.206364	-0.30669
6	-0.304413	-0.304199	-0.0563939	-0.415292	-0.225561	0.0350192	0.0321264	0.306217	-0.0311537	-0.336701	0.440766	0.53501	-0.0569251	0.0638365	-0.27321	-0.0970572	-0.0820354	-0.303044	-0.316171	0.210938	-0.0867938	-0.237252	-0.30106	-0.118544	0.301195	-0.30669
6.25	-0.336532	-0.315244	-0.00955978	-0.155752	-0.225561	0.170776	-0.280031	0.432358	-0.181699	-0.363929	0.482012	0.563685	-0.304747	-0.148451	-0.255996	-0.226163	-0.0564914	-0.303044	-0.147233	0.211183	0.158724	-0.352153	-0.315346	-0.272184	0.312327	-0.30669
6.5	-0.336532	-0.409588	-0.0937595	0.072695	-0.0472903	0.277851	-0.407959	0.510197	-0.267459	-0.363929	0.450148	0.596118	-0.470774	-0.312802	-0.199183	-0.355907	0.0951466	-0.303044	0.0550289	0.208996	0.316222	-0.480151	-0.315346	-0.299256	0.355784	-0.30669
6.75	-0.336532	-0.461541	-0.15312	0.375949	0.279647	0.279547	-0.435322	0.509122	-0.269798	-0.363929	0.314912	0.569668	-0.526865	-0.374728	-0.157058	-0.279989	0.134601	-0.303044	0.21934	0.175631	0.158724	-0.582593	-0.315346	-0.145616	0.40691	-0.30669
7	-0.336532	-0.404066	-0.180191	0.749714	0.489374	0.226973	-0.435322	0.43553	-0.222911	-0.363929	0.103496	0.381477	-0.48758	-0.387974	-0.199263	0.0744692	-0.0699921	-0.303044	0.272224	0.13458	-0.0867938	-0.564541	-0.315346	0.136151	0.307572	-0.30669
7.25	-0.336532	-0.283904	-0.240859	0.886765	0.279647	0.148191	-0.435322	0.304564	-0.230626	-0.363929	-0.139942	0.0263287	-0.400123	-0.387974	-0.333031	0.592169	-0.358948	-0.303044	0.169037	0.160143	-0.0632045	-0.392733	-0.315346	0.316903	0.126096	-0.30669
7.5	-0.336532	-0.16375	-0.351368	0.695692	-0.0472903	0.0399783	-0.435322	0.279451	-0.294688	-0.363929	-0.308445	-0.303542	-0.34402	-0.312802	-0.48414	0.82891	-0.510186	-0.303044	0.032037	0.263062	0.158724	-0.117509	-0.234265	0.443433	0.11945	-0.30669
7.75	-0.336532	-0.0122564	-0.36981	0.516073	-0.194149	-0.0674368	-0.280031	0.384394	-0.353486	-0.286665	-0.358571	-0.514899	-0.304747	-0.174943	-0.52626	0.592169	-0.412303	-0.303044	-0.0108485	0.306961	0.316222	0.0944576	-0.085566	0.7252	0.312906	-0.30669
8	-0.336532	0.270444	-0.24546	0.528825	-0.225561	-0.0835863	0.160055	0.481109	-0.389301	-0.144968	-0.316894	-0.52974	-0.21729	-0.0113351	-0.464469	0.16176	-0.174815	-0.303044	0.0566085	0.244733	0.158724	0.134528	0.0909048	1.11378	0.440264	-0.30669
8.25	-0.336532	0.537213	-0.024169	0.572229	-0.225561	0.0214033	0.627541	0.486941	-0.466089	-0.0540703	-0.193904	-0.287525	-0.14437	0.0380888	-0.409619	-0.0857004	-0.0305376	-0.303044	0.179064	0.214371	-0.0867938	0.0857834	0.144215	1.00697	0.428079	-0.30669
8.5	-0.154248	0.522137	0.183052	0.578373	-0.225561	0.106844	0.782833	0.428441	-0.511595	-0.067704	-0.04452	0.146506	-0.121914	0.0638365	-0.432036	-0.138856	-0.0769424	-0.303044	0.253405	0.330936	-0.0632045	0.0795574	0.0909048	0.624184	0.364249	-0.30669
8.75	0.180049	0.176417	0.344214	0.671361	-0.225561	0.0116372	0.60014	0.396329	-0.478296	-0.067704	0.0662152	0.508973	0.0609184	0.0513344	-0.459714	-0.172991	-0.240204	-0.303044	0.234584	0.458447	0.158724	0.0881897	-0.071279	0.343937	0.309571	-0.30669
9	0.394498	-0.08483	0.359104	0.77354	-0.225561	-0.217316	0.37011	0.394046	-0.394598	-0.0404561	0.109952	0.601339	0.32557	-0.0113351	-0.450868	-0.172991	-0.484242	-0.303044	0.176799	0.500605	0.316222	0.061775	-0.234265	0.289792	0.317207	-0.30669
9.25	0.180049	-0.0786644	0.11451	0.65138	-0.225561	-0.366955	0.0321264	0.392969	-0.372551	-0.067704	0.0722086	0.43697	0.252661	-0.161697	-0.486055	-0.0856842	-0.63587	-0.303044	0.137406	0.504634	0.158724	0.0510864	-0.30106	0.343975	0.381871	-0.30669
9.5	-0.154248	-0.0270138	-0.318877	0.456863	-0.225561	-0.372258	-0.280031	0.353766	-0.40344	-0.067704	0.00168421	0.249647	-0.0265383	-0.312802	-0.568778	-0.0546203	-0.63547	-0.303044	0.151875	0.558615	-0.0867938	0.102851	-0.315346	0.136151	0.538366	-0.30669
9.75	-0.304413	-0.0491261	-0.56731	0.435783	-0.225561	-0.262668	-0.252668	0.234048	-0.400254	-0.0404561	-0.0780593	0.122398	-0.144394	-0.374728	-0.605056	-0.0970572	-0.484632	-0.303044	0.218807	0.650481	-0.197079	0.130092	-0.234265	-0.145616	0.763875	-0.30669
10	-0.336532	0.0872846	-0.489781	0.51507	-0.225561	-0.14796	0.00476344	0.0912647	-0.358972	-0.144968	-0.175444	0.0445582	-0.135967	-0.387974	-0.597964	-0.161618	-0.195686	-0.303044	0.263428	0.747151	-0.220668	0.0666509	-0.00448421	-0.272184	0.87765	-0.30669
10.25	-0.336532	0.370628	-0.286358	0.450619	-0.225561	-0.0978309	0.187456	0.022994	-0.370871	-0.286665	-0.237757	0.118905	-0.21729	-0.162459	-0.605507	-0.172991	0.245985	-0.20767	0.213657	0.817963	-0.220668	-0.0659636	0.239604	-0.299256	0.770201	-0.30669
10.5	-0.154248	0.573764	-0.333192	0.331093	-0.225561	-0.123815	0.00476344	0.0762779	-0.371896	-0.195787	-0.229593	0.308406	-0.257059	0.25112	-0.643473	-0.0856842	0.502846	-0.0327608	0.121202	0.78939	-0.220668	-0.199441	0.239604	-0.145616	0.519404	-0.30669
10.75	0.362333	0.531683	-0.555316	0.379328	-0.225561	-0.127252	-0.280031	0.136464	-0.315385	0.228522	-0.261195	0.323278	-0.0490058	0.516428	-0.632043	0.0744692	0.325284	0.0794419	0.017365	0.685374	-0.220668	-0.28895	-0.00448421	0.136151	0.314026	-0.30669
11	0.911078	0.323888	-0.654769	0.557794	-0.225561	-0.160296	-0.407959	0.215221	-0.193548	0.770976	-0.369655	0.128316	0.196559	0.326292	-0.495896	0.268774	-0.095946	-0.0327608	-0.0580757	0.605283	-0.220668	-0.3197	-0.219978	0.316903	0.205964	-0.30669
11.25	0.911078	0.0617771	-0.591087	0.674816	-0.0472903	-0.227255	-0.435322	0.317056	-0.0806815	0.989937	-0.433945	0.0456102	0.221307	0.0505721	-0.254931	0.291536	-0.240624	-0.112296	-0.03002	0.651042	-0.220668	-0.318897	-0.30106	0.136151	0.254316	-0.30669
11.5	0.544616	0.00399229	-0.499501	0.61431	0.279647	-0.276248	-0.435322	0.445282	0.0416406	0.91187	-0.366438	0.193611	-0.0737427	0.0284016	-0.0286063	0.00992446	-0.0027363	0.079418	0.164088	0.741698	-0.220668	-0.263217	-0.234265	-0.145616	0.3424	-0.30669
11.75	0.394452	0.130312	-0.452674	0.295627	0.489374	-0.267551	-0.435322	0.501139	0.0930196	0.784571	-0.264914	0.3454	-0.336113	0.0380888	0.0806279	-0.0863549	0.160545	0.349725	0.362417	0.806418	-0.220668	-0.194222	-0.085566	-0.118544	0.413231	-0.30669
12	0.426617	0.301791	-0.527132	-0.0757282	0.279647	-0.184668	-0.435322	0.537556	0.0521619	0.656507	-0.220566	0.34052	-0.374914	0.0638365	0.0756875	0.151042	0.00890708	0.349725	0.349631	0.756934	-0.220668	-0.144872	0.171987	0.136151	0.430911	-0.30669
12.25	0.180049	0.500017	-0.586493	-0.130415	-0.0472903	-0.0518839	-0.435322	0.565301	-0.0361818	0.383833	-0.195945	0.270023	-0.248644	0.0513344	0.00980111	0.549732	-0.21468	0.157986	0.133209	0.535797	-0.0867938	-0.134267	0.373995	0.316903	0.40638	-0.30669
12.5	-0.154248	0.710493	-0.568058	0.118354	-0.194149	0.0811943	-0.435322	0.532421	-0.0736605	0.191336	-0.158971	0.168555	-0.0821455	-0.0113351	-0.0848792	0.741587	-0.279659	0.079418	-0.123198	0.251893	0.158724	-0.12632	0.416074	0.289792	0.356098	-0.30669
12.75	-0.304413	0.642601	-0.296674	0.272707	-0.225561	0.122023	-0.435322	0.50683	-0.069132	0.101222	-0.140572	0.138633	0.125436	-0.161697	-0.216541	0.732647	-0.240204	0.0962472	-0.331172	0.0287276	0.316222	-0.10085	0.158502	0.289792	0.415083	-0.30669
13	-0.336532	0.270444	0.145967	0.122875	-0.225561	0.023067	-0.435322	0.488166	-0.119301	0.100458	-0.153338	0.167188	0.300337	-0.312802	-0.356423	0.421264	-0.195686	-0.0327608	-0.428245	-0.10697	0.158724	-0.0791306	-0.153183	0.343975	0.596122	-0.30669
13.25	-0.336532	-0.0789901	0.409505	-0.0137909	-0.225561	-0.159426	-0.435322	0.440228	-0.170889	0.164872	-0.16258	0.188984	0.348037	-0.374728	-0.398729	-0.0439017	-0.0959262	-0.20767	-0.381011	-0.17549	-0.0867938	-0.081573	-0.124609	0.136151	0.629564	-0.30669
13.5	-0.336532	-0.199136	0.316584	0.0690096	-0.225561	-0.286829	-0.280031	0.3982	-0.123792	0.242155	-0.158378	0.0488477	0.18201	-0.312802	-0.28945	-0.257243	-0.0166369	-0.190865	-0.28986	-0.221306	-0.197079	-0.105624	0.225296	-0.145616	0.339475	-0.185468
13.75	-0.336532	-0.184045	0.150267	0.191817	-0.225561	-0.266489	0.00476344	0.435583	-0.06766	0.178505	-0.146378	-0.143368	-0.161199	-0.099771	-0.128876	-0.161618	0.0808361	0.0626127	-0.200922	-0.299936	-0.220668	-0.120298	0.564773	-0.272184	-0.141931	0.0368442
14	-0.336532	-0.16375	0.125559	0.102221	-0.225561	-0.185319	0.187456	0.509315	-0.0793603	-0.067704	-0.119512	-0.225987	-0.423086	0.126525	-0.07557	0.0213137	0.285819	0.349725	-0.0600888	-0.361718	-0.220668	-0.109186	0.469384	-0.299256	-0.520864	0.179456
14.25	-0.336532	-0.158228	0.132385	-0.0146256	-0.225561	-0.0971045	0.160055	0.506367	-0.147101	-0.273051	-0.0860401	-0.162415	-0.518462	0.201696	-0.156654	0.150403	0.372079	0.349725	0.148038	-0.316929	-0.220668	-0.111859	0.0765975	-0.145616	-0.619577	0.0368442
14.5	-0.336532	-0.189568	0.228558	0.0354147	-0.225561	-0.0516371	0.160055	0.395109	-0.19591	-0.350315	-0.089059	-0.0760798	-0.535267	0.188432	-0.257995	0.19284	0.127641	0.0626127	0.370832	-0.162813	-0.220668	-0.144569	-0.205691	0.136151	-0.460814	-0.185468
14.75	-0.336532	-0.247042	0.355551	0.251918	-0.0472903	-0.0462652	0.214819	0.320167	-0.259162	-0.363929	-0.147138	-0.0379131	-0.535267	0.214942	-0.290246	0.173166	-0.175235	-0.190865	0.518525	-0.00620653	-0.220668	-0.163221	-0.30106	0.316903	-0.212864	-0.28533
15	-0.336532	-0.283912	0.233712	0.423845	0.279647	0.000764753	0.00476344	0.415548	-0.280374	-0.286665	-0.170465	-0.0132821	-0.535267	0.13977	-0.271394	0.0212975	-0.272708	-0.286238	0.567977	0.0873318	-0.220668	-0.1365	-0.315346	0.136151	-0.085719	-0.30669

## Sheet: Fig 5 fig suppl 2Biv
Immobility onset (sec)	Down
-7	0.0115604	-0.0377456	0.0609998	0.0975242	-0.0267362	0.02141	0.0870202	0.0152142	0.0434614	0.126293	-0.0506256	-0.0393797	-0.00322799	0.0428461	0.0407244	0.140625	-0.0763988	-0.113522	-0.0213959	0.0285646	-0.0698513	0.148279	-0.0621524
-6.75	0.0272719	-0.0555506	0.0699333	0.108856	-0.0257869	0.00239554	0.00516904	0.00368867	0.0233285	0.141267	-0.0483212	-0.0295158	-0.0267753	-0.00495315	0.037204	0.24812	-0.110612	-0.128787	0.0367211	0.0640634	-0.131802	0.125869	-0.0533656
-6.5	0.0397387	-0.0508227	0.102243	0.0912643	-0.00231587	0.0622756	-0.0802882	-0.0356467	-0.00427245	0.089801	-0.0496753	-0.0247512	-0.0256715	-0.0332613	0.0383426	0.28536	-0.147184	-0.083613	0.0586377	0.1298	-0.180359	0.130674	-0.0676803
-6.25	0.0746245	-0.0311739	0.124007	0.0958915	0.0504936	0.13408	-0.137868	-0.0458666	-0.0158638	0.0358823	-0.0515793	-0.0208314	-0.0322956	-0.0658121	0.0493758	0.273049	-0.0784167	-0.0370709	0.0392623	0.166627	-0.186065	0.13782	-0.0895999
-6	0.134294	8.5902e-07	0.112981	0.113481	0.108106	0.15231	-0.120637	0.0127527	-0.0223194	0.0446602	-0.032463	0.0252738	-0.0468747	-0.0939508	0.0618727	0.24667	0.0379875	-0.0361284	0.0173003	0.141738	-0.145806	0.123479	-0.0962685
-5.75	0.179987	0.0538162	0.0772088	0.100105	0.14101	0.106787	-0.0683031	0.0803863	-0.0421633	0.0750247	0.0110691	0.0987144	-0.036503	-0.105674	0.0653061	0.199534	0.0622609	-0.0637982	0.0244251	0.10933	-0.0796123	0.111958	-0.106102
-5.5	0.16673	0.116846	0.0532588	0.0695544	0.150125	0.0500602	-0.041099	0.0769397	-0.0730116	0.0538929	0.0412934	0.121701	0.00635388	-0.0865796	0.0645661	0.135957	0.00500706	-0.0819526	-0.0146084	0.118844	-0.0544269	0.157531	-0.119499
-5.25	0.1117	0.14038	0.0537565	0.0433037	0.168747	0.0257542	-0.049075	0.0497512	-0.115339	0.0263497	0.0307612	0.0768791	0.0120917	-0.0627988	0.0634263	0.124457	-0.0341514	-0.128115	-0.0935001	0.14689	-0.0728365	0.272123	-0.108549
-5	0.0481598	0.0964769	0.0555041	0.0185105	0.205593	0.0439856	-0.0360374	0.0624784	-0.159878	0.00936642	-0.0135929	0.00191775	-0.0238778	-0.0377385	0.0454842	0.17125	-0.0554915	-0.181163	-0.117489	0.142566	-0.0783237	0.385215	-0.0738311
-4.75	0.00698488	0.025175	0.0245686	0.00967007	0.220511	0.0935009	-0.0230822	0.129475	-0.170509	0.0153697	-0.0596368	-0.0571103	-0.06067	0.00432758	-0.000748471	0.227455	-0.0442009	-0.169084	-0.0587248	0.10407	-0.0489224	0.408392	-0.0650218
-4.5	-0.00582656	-0.0110796	-0.0174114	0.0386765	0.160598	0.164461	-0.0189318	0.20671	-0.171454	0.0746498	-0.0825996	-0.0936883	-0.0693989	0.051023	-0.0434957	0.213067	0.0358539	-0.0988323	-0.016236	0.0446797	-0.0572942	0.316449	-0.0982225
-4.25	0.0266949	0.000986585	-0.0536086	0.106187	0.038036	0.226481	-0.0116663	0.270116	-0.17563	0.137033	-0.0877296	-0.119485	-0.0231796	0.0838146	-0.0596942	0.141304	0.128903	-0.0517617	-0.0406166	0.0104205	-0.105127	0.158516	-0.155449
-4	0.0789329	0.00962907	-0.0600421	0.149696	-0.0540408	0.211177	-0.00964776	0.301669	-0.15106	0.117652	-0.0883186	-0.139314	0.0479402	0.0565452	-0.0488094	0.0473013	0.150246	-0.0706887	-0.0804732	0.00648046	-0.149877	0.0235592	-0.202813
-3.75	0.0913175	-0.0172253	-0.025895	0.16865	-0.0736197	0.147468	-0.0555525	0.287161	-0.0927731	0.0358856	-0.103953	-0.150492	0.0699139	0.00617355	-0.0177981	-0.00217463	0.0508518	-0.0836867	-0.0934113	0.00916844	-0.167164	-0.0503101	-0.242403
-3.5	0.0462168	-0.0599143	0.0342755	0.164614	-0.0673989	0.10571	-0.0913335	0.221844	-0.0614286	0.0209754	-0.123963	-0.134976	0.0158342	-0.00599499	0.0264635	0.0086226	-0.0610953	-0.00301734	-0.0621059	0.0157923	-0.182785	-0.0794549	-0.261046
-3.25	0.00108595	-0.103232	0.0751896	0.11194	-0.053192	0.11923	-0.0858732	0.15807	-0.0683549	0.10811	-0.120298	-0.12353	-0.0235419	0.00328731	0.0708935	0.0583362	-0.114096	0.134514	0.00637825	0.0600554	-0.172111	-0.0883696	-0.245053
-3	-0.0304491	-0.130999	0.0503113	0.0447567	-0.00877235	0.102915	-0.0555265	0.109437	-0.0672549	0.174665	-0.0817112	-0.119752	-0.0347925	-2.56522e-05	0.103549	0.087995	-0.11274	0.241247	0.0658626	0.142528	-0.125351	-0.0877369	-0.205586
-2.75	-0.0379128	-0.140892	-0.0144178	0.0257139	0.0560929	0.049711	-0.00911148	0.0622318	-0.0718175	0.108943	-0.0225959	-0.105744	-0.031676	-0.0166745	0.145261	0.0874628	-0.0307882	0.255897	0.129766	0.217101	-0.0873856	-0.0778613	-0.170013
-2.5	-0.0244902	-0.099867	-0.0644139	0.07264	0.106672	0.0450532	0.0670362	0.0443687	-0.0829738	0.0197756	0.0345536	-0.0953073	-0.027073	-0.027059	0.205835	0.0689043	0.0945744	0.22474	0.178629	0.244554	-0.0808096	-0.0669315	-0.129278
-2.25	0.0365348	-0.00848465	-0.0659569	0.107401	0.145477	0.0856342	0.104227	0.0266864	-0.0700438	0.0382167	0.0921275	-0.0767719	-0.000503653	-0.0177798	0.272029	0.0630159	0.20336	0.200258	0.171722	0.212535	-0.0665933	-0.0562713	-0.0662637
-2	0.142909	0.101001	-0.0432043	0.0928103	0.19833	0.0996416	0.0728341	0.0383307	0.00524506	0.131972	0.15993	-0.00315423	0.0406492	0.033505	0.301297	0.052288	0.241159	0.21319	0.0941084	0.150409	-0.0244837	-0.0329079	0.00192911
-1.75	0.242228	0.141257	-0.00342859	0.0433037	0.253886	0.081287	0.0337706	0.134694	0.115744	0.175424	0.241753	0.12538	0.0783317	0.122268	0.276107	0.0319346	0.256468	0.226087	-0.0169101	0.110858	0.0352579	0.00472368	0.0457308
-1.5	0.251597	0.0982508	0.0556368	-0.0078289	0.28054	0.0966512	0.0462385	0.313728	0.183666	0.182867	0.311084	0.254949	0.112305	0.226812	0.220973	0.00593623	0.25322	0.201531	-0.0641029	0.104468	0.0816176	0.0128968	0.0753708
-1.25	0.206631	-0.000809743	0.103377	-0.0573311	0.235511	0.12514	0.138257	0.468201	0.152874	0.195417	0.330804	0.30101	0.147963	0.269814	0.165576	0.0330181	0.191951	0.115032	-0.0303311	0.10621	0.118126	-0.0433636	0.0835404
-1	0.204342	-0.0884264	0.0874717	-0.0853009	0.0879253	0.0977895	0.248925	0.509863	0.087835	0.187472	0.282494	0.239902	0.191289	0.199844	0.116703	0.0890466	0.102496	-0.00386774	0.0122837	0.0876082	0.160022	-0.15457	0.0442961
-0.75	0.227694	-0.122681	0.0249288	-0.0547528	-0.115291	0.0203979	0.310506	0.462095	0.0391631	0.180966	0.176744	0.0900866	0.196556	0.0649504	0.0461479	0.0501331	0.0304814	-0.0871364	-0.0164508	0.0325863	0.157054	-0.271299	-0.0467899
-0.5	0.191685	-0.10761	-0.0310959	0.0360116	-0.275078	-0.00267003	0.27806	0.402797	0.00843986	0.211328	0.0352484	-0.0766783	0.132258	-0.0352375	-0.0547156	-0.0763306	-0.0286632	-0.134228	-0.0776116	-0.0432039	0.0773417	-0.369473	-0.150707
-0.25	0.105245	-0.0568921	-0.072053	0.079611	-0.364555	0.0279601	0.173437	0.332899	-0.0274599	0.199412	-0.0917854	-0.183663	0.0136379	-0.0769419	-0.166449	-0.165527	-0.0784138	-0.196072	-0.106881	-0.110549	-0.0460884	-0.451964	-0.21828
0	0.0227242	-0.0122461	-0.125313	0.0416777	-0.408697	0.0326179	0.0841994	0.240963	-0.0797692	0.085633	-0.176241	-0.236747	-0.0786025	-0.110833	-0.235618	-0.178554	-0.118112	-0.285773	-0.0717073	-0.1534	-0.119972	-0.504316	-0.253539
0.25	-0.0387186	-0.0309369	-0.195163	-0.0356234	-0.417316	-0.0139761	0.052901	0.111517	-0.131844	-0.102629	-0.23429	-0.278118	-0.100494	-0.100342	-0.246231	-0.177418	-0.143047	-0.344731	-0.0498223	-0.177594	-0.13715	-0.516197	-0.2898
0.5	-0.0674039	-0.107036	-0.269559	-0.0909648	-0.385101	-0.06856	-0.00127377	0.015017	-0.164968	-0.20663	-0.288095	-0.338043	-0.0719694	-0.0523523	-0.240339	-0.201811	-0.114752	-0.332342	-0.114529	-0.194919	-0.155172	-0.506052	-0.317862
0.75	-0.0640548	-0.184897	-0.338341	-0.108466	-0.326009	-0.107161	-0.0830247	0.00629441	-0.159906	-0.18199	-0.338122	-0.403515	-0.0689539	-0.0185792	-0.254416	-0.252274	-0.0420731	-0.282359	-0.172957	-0.205964	-0.195562	-0.503754	-0.3144
1	-0.0451851	-0.180916	-0.387061	-0.100131	-0.266372	-0.129445	-0.108802	0.0599704	-0.140234	-0.0973807	-0.364185	-0.422649	-0.105944	-0.077473	-0.272217	-0.298025	-0.000362617	-0.218588	-0.143632	-0.211257	-0.221776	-0.502078	-0.276549
1.25	-0.027029	-0.114487	-0.395724	-0.0749166	-0.226117	-0.155893	-0.069818	0.0771163	-0.114633	-0.0501515	-0.350594	-0.390991	-0.168214	-0.145425	-0.265527	-0.320189	0.00500706	-0.161412	-0.0616741	-0.201647	-0.214794	-0.482173	-0.222458
1.5	0.00178591	-0.0454622	-0.361702	-0.0722496	-0.219915	-0.180321	-0.0289941	0.0565693	-0.0572849	-0.0567208	-0.29697	-0.324898	-0.184311	-0.134556	-0.228578	-0.321578	0.0264628	-0.10528	-0.0256895	-0.155536	-0.175181	-0.453244	-0.170235
1.75	0.0132526	-0.00253424	-0.317487	-0.0810878	-0.209872	-0.190332	-0.00607719	0.0450915	0.0325122	-0.0745991	-0.220989	-0.250815	-0.134427	-0.0680197	-0.193164	-0.337883	0.0473758	-0.0614436	-0.00818513	-0.0641617	-0.12193	-0.438083	-0.135916
2	-0.0188663	0.00638766	-0.283406	-0.0661693	-0.162321	-0.198549	-0.0220986	0.045865	0.10183	-0.0973203	-0.153111	-0.164622	-0.0833773	-0.018817	-0.176807	-0.312447	0.0185382	-0.034858	0.00276883	0.0443403	-0.0673987	-0.438478	-0.135993
2.25	-0.0473526	-0.0191322	-0.245118	-0.0299551	-0.100871	-0.203617	-0.0382648	0.0498307	0.100243	-0.126239	-0.116683	-0.0974522	-0.100167	-0.0199859	-0.17094	-0.234519	-0.0609768	-0.0175967	-0.0337077	0.127626	-0.0399815	-0.421713	-0.161314
2.5	-0.0218989	-0.0604871	-0.192797	0.00667759	-0.0344553	-0.205698	-0.00503181	0.0522196	0.0456134	-0.159635	-0.100191	-0.061363	-0.110743	-0.0355325	-0.158127	-0.144707	-0.154453	0.00793024	-0.0894972	0.167445	-0.0159796	-0.365641	-0.190054
2.75	0.0078846	-0.084147	-0.125612	-0.00053019	0.0409082	-0.196468	0.0598462	0.061226	0.00107296	-0.166139	-0.0710154	-0.0375618	-0.0488978	-0.0333233	-0.125405	-0.107269	-0.200182	0.0541445	-0.130164	0.172462	0.0108721	-0.282168	-0.19057
3	0.0185051	-0.104224	-0.0774231	-0.0460011	0.102911	-0.158098	0.0675658	0.0345498	0.012001	-0.120937	-0.0157835	-0.00782396	0.0777813	0.00211842	-0.0875655	-0.0510126	-0.159938	0.104247	-0.0837306	0.14916	0.0407737	-0.217361	-0.168723
3.25	0.0379911	-0.124507	-0.0822184	-0.0152163	0.121359	-0.0942228	0.0175702	-0.0287322	0.0659879	-0.0490823	0.0501887	0.0367688	0.165747	0.0657608	-0.0530639	0.0532719	-0.074935	0.124544	0.0174391	0.11056	0.0583823	-0.200635	-0.140321
3.5	0.0597693	-0.123643	-0.109054	0.107399	0.105606	-0.0401929	0.00600562	-0.0748075	0.0920511	0.0154383	0.0833396	0.0751535	0.165967	0.11932	-0.0307093	0.118869	0.0338503	0.104321	0.111766	0.0576028	0.0548603	-0.212333	-0.116148
3.75	0.0611102	-0.0909818	-0.109031	0.206917	0.0890493	-0.0375608	0.0386205	-0.0853498	0.0840069	0.0326142	0.0644097	0.0945436	0.0732623	0.117109	-0.000938268	0.0995728	0.0985959	0.0723704	0.113145	0.0018756	0.0300511	-0.207728	-0.104601
4	0.0838376	-0.0373451	-0.0703611	0.1642	0.0873906	-0.035252	0.0934656	-0.0900125	0.0772284	0.0187765	0.0135894	0.0577266	-0.0296186	0.0668646	0.0399244	0.0189523	0.096471	0.0612297	0.034899	-0.0323117	-0.00683426	-0.18635	-0.103096
4.25	0.1138	0.00502433	-0.0368689	0.0766712	0.0976736	-0.00468808	0.103245	-0.124755	0.0865985	0.00369058	-0.0234624	0.0107388	-0.0857294	0.0275372	0.069866	-0.0249628	0.0721919	0.0773219	-0.0626445	-0.0213769	-0.0241015	-0.187042	-0.100917
4.5	0.114217	0.00710824	-0.0427449	0.0494705	0.113209	0.0254696	0.0502911	-0.154289	0.1017	-0.0122823	-0.0238954	0.00470913	-0.091922	0.0564134	0.0712985	0.0025258	0.056767	0.116035	-0.0620311	0.0298852	-0.01484	-0.225768	-0.089573
4.75	0.0906177	-0.00569994	-0.0781281	0.0535993	0.13054	0.0257587	-0.00228613	-0.134114	0.0992789	-0.0552162	-0.0192196	0.0286158	-0.0907788	0.158879	0.0507048	0.0894431	0.0701825	0.172936	0.0118395	0.0835683	0.00197015	-0.267331	-0.0687616
5	0.0667796	0.0153634	-0.109187	0.0227214	0.129825	0.00925622	0.0227169	-0.0851362	0.0885829	-0.0996579	-0.0468659	0.0254288	-0.0886462	0.214712	0.0250051	0.125846	0.0682888	0.2111	0.0651975	0.0975169	0.0133664	-0.276216	-0.0447213
5.25	0.00877351	0.0507595	-0.131369	-0.0341661	0.106975	0.01039	0.0375821	-0.0299865	0.0631384	-0.0928459	-0.0954857	-0.016578	-0.0901199	0.100227	0.0107036	0.0646774	0.0244534	0.188163	0.0830729	0.0687054	0.053782	-0.253907	-0.0307078
5.5	-0.0326754	0.0759437	-0.158213	-0.074921	0.0787312	-0.00647555	0.00546605	0.00589967	0.0167471	-0.0821054	-0.133729	-0.0900098	-0.0682248	-0.0741192	0.00716298	-0.0547785	-0.0212814	0.116141	0.0919046	0.0311807	0.0985228	-0.222112	-0.0276116
5.75	-0.0124746	0.0845344	-0.168777	-0.0867539	0.0494399	-0.0870775	-0.0237416	0.031374	-0.0310775	-0.118971	-0.157569	-0.155455	-0.0474531	-0.155327	0.00269454	-0.142941	-0.00786584	0.0465443	0.0692403	0.00203925	0.0774286	-0.188325	-0.0302494
6	0.0145475	0.0701149	-0.128242	-0.067711	0.0367076	-0.124567	-0.0175302	0.00942574	-0.0631799	-0.171444	-0.163016	-0.16779	-0.0583229	-0.136761	0.000440853	-0.191054	0.0131657	0.03217	0.0516787	-0.0110702	-0.0153409	-0.160214	-0.0299943
6.25	-0.00689435	0.0360465	-0.0474881	-0.0387046	0.0386902	-0.0269761	-0.0248459	-0.0463248	-0.0345358	-0.162801	-0.125484	-0.106791	-0.0840835	-0.109726	0.00378652	-0.193188	-0.0098723	0.0663753	0.0747353	-0.0237908	-0.114466	-0.139117	-0.0349212
6.5	-0.0445579	-0.00545669	0.0386217	-0.0181179	0.0460214	0.126935	-0.0778549	-0.0492226	0.0302689	-0.0877828	-0.0556876	-0.00518955	-0.0853351	-0.0943109	0.0127777	-0.153734	-0.0138995	0.100054	0.0856629	-0.0548086	-0.164237	-0.129477	-0.0784662
6.75	-0.021381	-0.024776	0.0962529	-0.0268696	0.0717335	0.185743	-0.146142	0.0316206	0.0904029	-0.00697493	-0.0045519	0.0552272	-0.0568841	-0.0565345	0.0155122	-0.0834812	0.0587792	0.108681	0.0750091	-0.097383	-0.167845	-0.109727	-0.14472
7	0.0492117	0.00148475	0.101703	-0.0285022	0.107466	0.127879	-0.164096	0.114531	0.101191	0.00565808	-0.00638446	0.0538639	-0.030383	-0.0133584	0.0112168	0.0042503	0.10463	0.0928114	0.052821	-0.111371	-0.158427	-0.0738095	-0.179244
7.25	0.0797828	0.0567099	0.0630407	0.0257161	0.120765	0.0540536	-0.102842	0.128946	0.0927768	-0.0168889	-0.0286583	0.0354108	-0.0283226	-0.00849911	0.0013587	0.0922892	0.0849491	0.0835346	0.0468257	-0.088273	-0.161546	-0.0479318	-0.152255
7.5	0.0658482	0.0968278	-0.0150763	0.0754001	0.11509	0.0381971	0.00396246	0.0890853	0.11031	-0.0475777	-0.0358891	0.0474435	-0.0278538	-0.0262517	-0.014433	0.105571	0.0756678	0.104149	0.098867	-0.0544203	-0.148134	-0.065765	-0.0684539
7.75	0.0604562	0.0991038	-0.0984995	0.0592654	0.127591	0.0337471	0.11005	0.0269952	0.128875	-0.101554	-0.0314278	0.0833688	0.00752394	-0.034129	-0.0433463	0.0423456	0.0916411	0.164556	0.229597	-0.00440567	-0.0824169	-0.103536	0.0119332
8	0.0514325	0.0842421	-0.120266	0.00358761	0.152109	-0.00682631	0.181468	-0.0226487	0.116727	-0.160772	-0.0231956	0.103818	0.0500006	-0.0461516	-0.0691562	-0.0504801	0.0508518	0.239188	0.295553	0.0773763	-0.00227792	-0.11306	0.0562381
8.25	0.0152051	0.0431742	-0.0697548	-0.0120398	0.147278	-0.0735655	0.173384	-0.0840684	0.0684699	-0.155226	-0.0328702	0.0637301	0.0650073	-0.0459138	-0.074397	-0.0757556	0.0109222	0.24384	0.260764	0.156641	0.0284692	-0.0894283	0.0660705
8.5	-0.0319005	-0.0265894	-0.00498841	-0.00774017	0.10992	-0.128666	0.0724695	-0.108146	0.0268964	-0.0995257	-0.0620176	-0.0106262	0.0492994	-0.063541	-0.0500419	-0.0626561	0.0324907	0.16863	0.197995	0.169061	0.0325825	-0.0664679	0.0558052
8.75	-0.066372	-0.0968117	0.00631014	-0.0037045	0.0733935	-0.106994	-0.0152844	-0.0695034	0.0237365	-0.0264231	-0.086678	-0.0580283	-0.0142183	-0.105736	-0.0115125	0.020182	0.062258	0.103568	0.156688	0.109973	0.0427452	-0.0573566	0.0342576
9	-0.061744	-0.142549	-0.0305284	0.0344655	0.0592115	-0.0465011	-0.0153087	-0.00665087	0.0398223	0.0110259	-0.0901165	-0.0544702	-0.101273	-0.112809	0.0128751	0.151355	0.0929921	0.0574702	0.0730273	0.0351513	0.012759	-0.0570165	0.001856
9.25	-0.00946983	-0.167231	-0.0742984	0.0913552	0.0572591	0.00926232	0.0236796	0.032223	0.0801326	0.069153	-0.0957023	-0.043293	-0.113279	-0.072078	0.0172937	0.234004	0.109996	0.0101217	0.00602467	-0.0235553	-0.0457405	-0.0640593	-0.043046
9.5	0.0562746	-0.171509	-0.0753991	0.120691	0.0465674	0.0165293	-0.00872225	0.0187753	0.120241	0.139058	-0.120374	-0.0852496	-0.0196351	-0.024041	0.0295706	0.189093	0.0910984	-0.0586683	0.0508241	-0.046945	-0.0769764	-0.0927696	-0.0988966
9.75	0.0869356	-0.159996	-0.051401	0.0810618	0.0170751	-0.0211845	-0.0858058	-0.0417652	0.124477	0.172572	-0.127654	-0.112036	0.0671936	-0.0261866	0.0619829	0.0894777	0.0284721	-0.111104	0.111778	-0.0453257	-0.0956951	-0.127582	-0.136511
10	0.0751643	-0.136697	-0.0403661	0.0287129	0.00721363	-0.0684984	-0.0899344	-0.0748863	0.100979	0.121881	-0.0942931	-0.046914	0.0596338	-0.0459789	0.101637	0.0320173	-0.0138995	-0.131893	0.094814	-0.0376146	-0.110831	-0.132257	-0.126261
10.25	0.0178614	-0.107959	-0.036504	0.00100711	0.0365345	-0.081846	-0.0180502	-0.0300637	0.0884832	0.0680805	-0.0605986	0.0592209	0.032538	-0.0502083	0.130032	0.0637838	0.0284721	-0.126231	-0.00377973	-0.0336513	-0.109968	-0.100771	-0.0808564
10.5	-0.0128638	-0.0658343	-0.0190678	-0.0165762	0.0745627	-0.0394159	0.0439606	0.0489666	0.12944	0.0568384	-0.0678993	0.0788118	0.0362034	-0.0238064	0.112882	0.144817	0.0588977	-0.0974211	-0.06626	-0.0634349	-0.0755506	-0.0632527	-0.0550864
10.75	-0.0123115	0.00890087	0.00782451	-0.0676223	0.101402	0.0257603	0.0789148	0.0784193	0.166789	0.0230767	-0.1047	0.0392372	0.0428624	-0.0397586	0.0318227	0.208969	0.0184226	-0.0510022	-0.100456	-0.121841	-0.0379011	-0.0386287	-0.0567033
11	3.5946e-05	0.0635587	0.0213938	-0.130681	0.121668	0.0255312	0.100395	0.0655885	0.169683	-0.0574868	-0.124279	0.0339351	0.00652409	-0.101379	-0.0819118	0.191133	0.00152534	-0.00787785	-0.137906	-0.165893	-0.0124957	-0.0311045	-0.0556882
11.25	-0.00702506	0.0663123	0.0199951	-0.153846	0.117856	-0.0019471	0.0559895	0.0682894	0.137898	-0.144489	-0.129551	0.0246965	-0.0148907	-0.143093	-0.166138	0.113307	0.0493851	0.0114317	-0.147374	-0.174015	0.00117804	-0.0429321	-0.0339565
11.5	-0.0162029	0.0467275	-0.00620683	-0.14355	0.0850427	-0.00569863	-0.0621652	0.0424383	0.0680781	-0.19386	-0.140003	-0.0224504	-0.0162837	-0.105737	-0.186531	0.0646411	0.0796951	-0.00972744	-0.108291	-0.168989	0.00849779	-0.0667952	-0.0116103
11.75	-0.00656226	0.0724489	-0.0354136	-0.133676	0.0313076	0.0106206	-0.160729	-0.0326001	-0.0121546	-0.176813	-0.149909	-0.0663037	0.0119305	-0.0310475	-0.158298	0.0435827	0.0299416	-0.0409503	-0.0472232	-0.152821	0.0360719	-0.0882881	-0.00936776
12	0.0314525	0.0874447	-0.0436346	-0.123382	-0.0110374	-0.0242146	-0.158216	-0.104972	-0.0421025	-0.107164	-0.148484	-0.0711835	0.0706102	-0.0346585	-0.115035	0.00858157	-0.0515856	-0.0778623	0.00911845	-0.127273	0.105776	-0.0859116	-0.0266352
12.25	0.0352569	0.0189062	-0.0202237	-0.0750075	-0.019657	-0.0797618	-0.0939439	-0.100569	-0.0164715	-0.0134805	-0.121162	-0.0401454	0.115432	-0.0681499	-0.0750415	-0.0293321	-0.129518	-0.105876	-0.00113962	-0.110448	0.156945	-0.0415842	-0.0632504
12.5	-0.00237422	-0.069681	0.0292467	-0.00969823	0.0149934	-0.131469	-0.0335373	-0.0643217	0.00139676	0.0485903	-0.0773612	0.00713376	0.116321	-0.0333264	-0.0371356	-0.0297049	-0.19817	-0.115662	-0.0883413	-0.113097	0.181469	0.0247867	-0.129349
12.75	-0.0468747	-0.0826969	0.0829787	0.0463072	0.0510114	-0.117415	0.00847273	-0.0662936	-0.00420302	0.111016	-0.0380128	0.0496335	0.0605605	0.0586924	-0.0142569	-0.0186504	-0.255305	-0.100095	-0.161513	-0.103349	0.173969	0.0672733	-0.216439
13	-0.0521007	-0.0598602	0.111795	0.0197245	0.0718994	-0.0443598	0.0272485	-0.0816863	0.00806817	0.167085	-0.0383854	0.0671774	-0.00635294	0.120126	-0.00598699	-0.0346115	-0.255421	-0.0464274	-0.174934	-0.0564415	0.086882	0.072023	-0.278255
13.25	0.0208223	-0.00915163	0.106551	-0.044546	0.0864875	0.03363	0.0524838	-0.0587449	0.0354384	0.189681	-0.0720275	0.051449	-0.057357	0.102373	-0.00689265	-0.0381771	-0.181278	0.0232959	-0.146625	0.0177627	-0.0341118	0.0593972	-0.259869
13.5	0.11455	0.0118422	0.0782363	-0.098086	0.0855395	0.0681257	0.0691683	-0.0389737	0.0583013	0.147702	-0.0971749	0.0333352	-0.0720117	0.044186	-0.0163998	0.00868785	-0.0784081	0.0518519	-0.0854352	0.0729666	-0.0896129	0.06222	-0.169583
13.75	0.1547	-0.019416	0.0603161	-0.120388	0.0457218	0.0730696	0.0713869	-0.0599403	0.0648714	0.0522366	-0.0882526	0.0345412	-0.0311286	-0.0188233	-0.0294314	0.0628944	0.00701924	0.00528896	-0.014121	0.0609699	-0.0717852	0.0783102	-0.0656266
14	0.132024	-0.0490897	0.0449842	-0.114546	-0.00726662	0.0816378	0.0636051	-0.0727783	0.0782559	-0.0571837	-0.0607335	0.0671626	0.0637959	-0.0529854	-0.0507006	0.0932612	0.0602487	-0.0917043	0.0310327	-0.0244883	-0.0859211	0.093365	0.00849994
14.25	0.0393947	-0.0237828	0.0127058	-0.110003	-0.0220062	0.0752725	0.0580453	-0.0716523	0.119908	-0.110333	-0.0497574	0.0675419	0.12229	-0.0897686	-0.0806124	0.093758	0.0514002	-0.157773	0.0433231	-0.124572	-0.129742	0.0992066	0.0511116
14.5	-0.0466869	0.020228	-0.0350141	-0.140883	0.00229677	0.0662104	0.0403859	-0.0663233	0.192839	-0.0336964	-0.0567429	0.0591715	0.0928676	-0.136017	-0.110341	0.0588592	-0.0460974	-0.15969	0.0527778	-0.158415	-0.114482	0.115187	0.0632335
14.75	-0.0511637	0.0228938	-0.0618746	-0.165768	-0.0104419	0.041966	-0.0187974	-0.0463431	0.259068	0.0703092	-0.0451327	0.098331	0.0213968	-0.158633	-0.127546	0.0318972	-0.133655	-0.122422	0.0432197	-0.105276	-0.0357677	0.135716	0.0602024
15	-0.0112008	-0.00210759	-0.0579022	-0.152302	-0.0687475	0.00240012	-0.0659985	-0.00627803	0.261176	0.090634	-0.0120166	0.150422	-0.0333219	-0.13086	-0.12882	0.0534184	-0.135007	-0.070562	0.0305543	-0.0111058	0.0321818	0.14483	0.0602072

## Sheet: Fig 5 fig suppl 2A-C Units
Figure 5 - figure supplement 2 A
	Light onset	Go sound	NG sound with FA	Reward onset
Up	3	2	0	4
Down	8	15	18	31
Nonresponder	30	24	22	6
Figure 5 - figure supplement 2 B
	Precue poke	Go poke	FA poke	Immonility
Up	3	5	2	0
Down	24	29	24	23
Nonresponder	14	6	14	18
Figure 5 - figure supplement 2 C
	NG sound withhold
Up	5
Down	4
Nonresponder	30
Figure 5 - figure supplement 2 D
	Movement
Up	20
Down	2
Nonresponder	19

## Sheet: Fig 5 fig suppl 2E
	No poke																																Low
Up	-0.124812	-0.0191544	0.0173909																														-0.136076	0.0126878	0.119544
Down	-0.196033	0.146923	-0.0196182	-0.231081	0.00096749	0.290589	-0.0839786	-0.120672	0.0241315	-0.0658889	-0.0968419	-0.0372668	-0.139709	-0.00911034	0.0265504	0.0389132	0.12225	-0.212491	1.11504	-0.084375	0.186476	-0.0363722	0.0106988	0.0883869									0.169652	0.118911	-0.034099	-0.00534393	-0.0364778	-0.0395761	0.147474	0.0674955	-0.0249095	0.052975	0.125982	0.0167134	-0.00208769	0.0371571	0.0763753	0.0459877	-0.0565798
Non-responder	0.0188367	0.173512	-0.100647	-0.153894	0.103421	-0.0778887	0.00501411	-0.00383531	-0.129177	-0.169657	0.0249907	-0.045006	0.0797715	-0.101932																			-0.007938	-0.156431	0.0960755	0.0133126	-0.204356	0.0198342	-0.0808678	0.0194661	-0.0737685	-0.0295311	-0.0181919	0.0651603	0.00226657	-0.0103759
[truncated: 41 more columns]
