# Supplementary material for: Dissociation of impulsive traits by subthalamic metabotropic glutamate receptor 4
Source: eLife. 2022 Jan 4;11:e62123. doi: 10.7554/eLife.62123 (PMC8803315; doi:10.7554/eLife.62123)
Supplement: Figure 5—figure supplement 3—source data 1. [file elife-62123-fig5-figsupp3-data1.xlsx]

## Sheet: Fig 5 fig suppl 3A
Frequency (Hz)	Precue
3.41797	0.000218	2.92126e-05	2.92383e-05	2.97022e-05	2.89777e-05	2.92008e-05	2.91648e-05	3.04677e-05	3.05252e-05	0.000141	0.000135	2.74317e-05	2.71706e-05	2.74509e-05	2.77183e-05	2.71017e-05	0.000126		2.68281e-05	2.23302e-05	2.28178e-05	2.25177e-05	2.20578e-05	2.34788e-05	2.31554e-05	2.29245e-05	2.0982e-05	2.29016e-05	2.33133e-05	2.33946e-05	2.25207e-05	2.28328e-05	2.23809e-05	0.000308
3.90625	0.000302	4.12208e-05	4.12621e-05	4.19217e-05	4.09354e-05	4.12933e-05	4.12446e-05	4.29492e-05	4.30091e-05	0.000178	0.000169	3.86399e-05	3.83122e-05	3.87481e-05	3.90305e-05	3.82407e-05	0.000158		3.73917e-05	3.08798e-05	3.15346e-05	3.11246e-05	3.05564e-05	3.25417e-05	3.19891e-05	3.17858e-05	2.91594e-05	3.16715e-05	3.22401e-05	3.23933e-05	3.12112e-05	3.15861e-05	3.10019e-05	0.000383
4.39453	0.000383	5.25303e-05	5.24535e-05	5.33231e-05	5.20683e-05	5.25425e-05	5.25561e-05	5.45378e-05	5.46775e-05	0.000198	0.000187	4.92103e-05	4.87624e-05	4.93867e-05	4.96951e-05	4.87876e-05	0.000175		4.64717e-05	3.83864e-05	3.91754e-05	3.86863e-05	3.81032e-05	4.03582e-05	3.97418e-05	3.95466e-05	3.64038e-05	3.9317e-05	4.00383e-05	4.02712e-05	3.88325e-05	3.92208e-05	3.85351e-05	0.000411
4.88281	0.000459	6.25065e-05	6.22748e-05	6.33386e-05	6.18599e-05	6.25156e-05	6.25631e-05	6.46933e-05	6.49194e-05	0.000198	0.000185	5.86591e-05	5.79781e-05	5.88698e-05	5.92329e-05	5.81966e-05	0.000175		5.29647e-05	4.4056e-05	4.49191e-05	4.43794e-05	4.38716e-05	4.6346e-05	4.56137e-05	4.54848e-05	4.21245e-05	4.51162e-05	4.58506e-05	4.61149e-05	4.46761e-05	4.5054e-05	4.43016e-05	0.000399
5.37109	0.000549	7.27559e-05	7.21778e-05	7.33924e-05	7.17552e-05	7.25758e-05	7.2682e-05	7.49942e-05	7.53353e-05	0.00019	0.000177	6.84193e-05	6.73394e-05	6.85573e-05	6.89998e-05	6.78938e-05	0.000168		5.83572e-05	4.91882e-05	5.00805e-05	4.94896e-05	4.90898e-05	5.16008e-05	5.09114e-05	5.08899e-05	4.73703e-05	5.02478e-05	5.09189e-05	5.1266e-05	4.99493e-05	5.01595e-05	4.9416e-05	0.000366
5.85938	0.000662	8.38178e-05	8.27886e-05	8.41135e-05	8.23457e-05	8.31838e-05	8.34041e-05	8.59259e-05	8.65086e-05	0.000184	0.000171	7.87986e-05	7.74136e-05	7.88944e-05	7.94435e-05	7.82026e-05	0.000163		6.42115e-05	5.49923e-05	5.59059e-05	5.52306e-05	5.49308e-05	5.73116e-05	5.68987e-05	5.69908e-05	5.35683e-05	5.61741e-05	5.68265e-05	5.70963e-05	5.59976e-05	5.61225e-05	5.53419e-05	0.000335
6.34766	0.000825	9.46176e-05	9.31036e-05	9.45933e-05	9.26548e-05	9.35073e-05	9.38747e-05	9.66554e-05	9.74561e-05	0.000183	0.000168	8.90266e-05	8.72204e-05	8.90087e-05	8.98253e-05	8.83831e-05	0.000162		7.1225e-05	6.1727e-05	6.25785e-05	6.17244e-05	6.15498e-05	6.41413e-05	6.38477e-05	6.41458e-05	6.09396e-05	6.32146e-05	6.3797e-05	6.388e-05	6.3088e-05	6.33017e-05	6.24254e-05	0.000306
6.83594	0.001031	0.000105	0.000103	0.000104	0.000102	0.000103	0.000104	0.000107	0.000108	0.000186	0.000168	9.88106e-05	9.64834e-05	9.85264e-05	9.97729e-05	9.80988e-05	0.000164		8.14978e-05	7.17352e-05	7.25914e-05	7.14279e-05	7.13608e-05	7.40274e-05	7.41251e-05	7.46609e-05	7.20957e-05	7.3803e-05	7.44472e-05	7.4271e-05	7.36868e-05	7.41139e-05	7.30404e-05	0.000291
7.32422	0.001193	0.000115	0.000112	0.000114	0.000112	0.000113	0.000113	0.000117	0.000118	0.000185	0.000166	0.000109	0.000106	0.000108	0.00011	0.000108	0.000162		9.71701e-05	8.6956e-05	8.77761e-05	8.61912e-05	8.62203e-05	8.89899e-05	8.97588e-05	9.05082e-05	8.88034e-05	9.01255e-05	9.09338e-05	9.01872e-05	8.98085e-05	9.06117e-05	8.92554e-05	0.000285
7.8125	0.001257	0.000123	0.00012	0.000121	0.000119	0.00012	0.00012	0.000124	0.000126	0.000184	0.000163	0.000116	0.000113	0.000115	0.000117	0.000115	0.000161		0.00012	0.000109	0.00011	0.000108	0.000108	0.000111	0.000112	0.000114	0.000113	0.000114	0.000115	0.000113	0.000113	0.000114	0.000113	0.000281
8.30078	0.001212	0.000122	0.000119	0.00012	0.000118	0.000119	0.00012	0.000123	0.000125	0.00017	0.00015	0.000115	0.000112	0.000114	0.000116	0.000114	0.000149		0.000143	0.000132	0.000132	0.00013	0.00013	0.000133	0.000136	0.000137	0.000136	0.000138	0.000139	0.000137	0.000137	0.000139	0.000136	0.000269
8.78906	0.001083	0.000115	0.000111	0.000113	0.000111	0.000111	0.000112	0.000115	0.000117	0.000151	0.000135	0.000107	0.000104	0.000106	0.000109	0.000107	0.000133		0.000155	0.000143	0.000144	0.000141	0.000142	0.000145	0.000148	0.00015	0.000147	0.00015	0.000151	0.000149	0.000149	0.000151	0.000149	0.000253
9.27734	0.000924	9.92057e-05	9.62143e-05	9.75851e-05	9.58781e-05	9.62467e-05	9.69173e-05	9.98482e-05	0.000101	0.000136	0.000123	9.23103e-05	9.01145e-05	9.16198e-05	9.33665e-05	9.18735e-05	0.000121		0.000152	0.000141	0.000141	0.000138	0.000139	0.000142	0.000145	0.000147	0.000143	0.000147	0.000148	0.000146	0.000146	0.000149	0.000146	0.000227
9.76562	0.000822	7.90962e-05	7.6911e-05	7.79986e-05	7.66101e-05	7.69879e-05	7.75233e-05	7.97188e-05	8.07855e-05	0.000122	0.000111	7.31494e-05	7.17355e-05	7.28394e-05	7.39968e-05	7.28799e-05	0.000108		0.000133	0.000122	0.000123	0.00012	0.00012	0.000124	0.000126	0.000128	0.000123	0.000127	0.000129	0.000127	0.000127	0.000129	0.000127	0.000198
10.2539	0.000732	6.08252e-05	5.93437e-05	6.02048e-05	5.91282e-05	5.94997e-05	5.98861e-05	6.14693e-05	6.22458e-05	0.000109	0.000101	5.58086e-05	5.52017e-05	5.59768e-05	5.64488e-05	5.57329e-05	9.67171e-05		0.000105	9.5339e-05	9.58358e-05	9.37601e-05	9.42728e-05	9.68983e-05	9.81508e-05	9.95982e-05	9.44508e-05	9.88857e-05	0.0001	9.87747e-05	9.86792e-05	0.000101	9.8633e-05	0.000171
10.7422	0.00066	4.78208e-05	4.68182e-05	4.75192e-05	4.66569e-05	4.70088e-05	4.72862e-05	4.84512e-05	4.90012e-05	9.86852e-05	9.1423e-05	4.35393e-05	4.34112e-05	4.39861e-05	4.40168e-05	4.35614e-05	8.78337e-05		7.7671e-05	6.9597e-05	7.00739e-05	6.86345e-05	6.90248e-05	7.12666e-05	7.16607e-05	7.27242e-05	6.81299e-05	7.18048e-05	7.29197e-05	7.19852e-05	7.18105e-05	7.32398e-05	7.178e-05	0.000149
11.2305	0.000554	3.95227e-05	3.88166e-05	3.94092e-05	3.87114e-05	3.90392e-05	3.92649e-05	4.01621e-05	4.05585e-05	8.59531e-05	8.00854e-05	3.57671e-05	3.59188e-05	3.63799e-05	3.6136e-05	3.58613e-05	7.65042e-05		5.99648e-05	5.26916e-05	5.31503e-05	5.21262e-05	5.23495e-05	5.42612e-05	5.41883e-05	5.49362e-05	5.08853e-05	5.40357e-05	5.49426e-05	5.45159e-05	5.40903e-05	5.51147e-05	5.40156e-05	0.000132
11.7188	0.000444	3.40042e-05	3.34589e-05	3.39789e-05	3.33881e-05	3.37064e-05	3.38937e-05	3.46076e-05	3.49676e-05	7.39866e-05	6.85075e-05	3.05914e-05	3.09342e-05	3.13037e-05	3.08823e-05	3.07238e-05	6.55306e-05		4.84877e-05	4.18213e-05	4.22801e-05	4.15242e-05	4.16373e-05	4.32808e-05	4.2978e-05	4.34044e-05	3.99318e-05	4.26594e-05	4.34128e-05	4.33305e-05	4.2705e-05	4.34615e-05	4.25682e-05	0.000117
12.207	0.000355	2.96809e-05	2.92309e-05	2.96946e-05	2.91611e-05	2.94892e-05	2.96261e-05	3.02377e-05	3.05718e-05	6.36802e-05	5.88066e-05	2.65989e-05	2.70214e-05	2.73313e-05	2.68736e-05	2.67788e-05	5.63009e-05		4.08521e-05	3.44602e-05	3.48921e-05	3.43396e-05	3.43734e-05	3.5803e-05	3.53974e-05	3.56638e-05	3.25915e-05	3.4931e-05	3.56033e-05	3.56541e-05	3.50054e-05	3.55464e-05	3.48158e-05	0.000104
12.6953	0.000292	2.64276e-05	2.60305e-05	2.64619e-05	2.59636e-05	2.62562e-05	2.63767e-05	2.68969e-05	2.72318e-05	5.52991e-05	5.12804e-05	2.36688e-05	2.40827e-05	2.43522e-05	2.39517e-05	2.38434e-05	4.92626e-05		3.55304e-05	2.94621e-05	2.98568e-05	2.94177e-05	2.93922e-05	3.07129e-05	3.02482e-05	3.04454e-05	2.76901e-05	2.97989e-05	3.03776e-05	3.05492e-05	2.98606e-05	3.02805e-05	2.96636e-05	9.57754e-05
13.1836	0.000257	2.36468e-05	2.32718e-05	2.3679e-05	2.32078e-05	2.34749e-05	2.35552e-05	2.4023e-05	2.43433e-05	5.09359e-05	4.70261e-05	2.12095e-05	2.15599e-05	2.1813e-05	2.14952e-05	2.13571e-05	4.52936e-05		3.15703e-05	2.5948e-05	2.62898e-05	2.59503e-05	2.5869e-05	2.70665e-05	2.66113e-05	2.67462e-05	2.43535e-05	2.62244e-05	2.67092e-05	2.69571e-05	2.62581e-05	2.66122e-05	2.60336e-05	8.66965e-05
13.6719	0.000246	2.1335e-05	2.10128e-05	2.14004e-05	2.09491e-05	2.11825e-05	2.1245e-05	2.16732e-05	2.1955e-05	4.69352e-05	4.37987e-05	1.91973e-05	1.94487e-05	1.96907e-05	1.94397e-05	1.92985e-05	4.27316e-05		2.87864e-05	2.33695e-05	2.36601e-05	2.33755e-05	2.32598e-05	2.44421e-05	2.39299e-05	2.40453e-05	2.19278e-05	2.35641e-05	2.40112e-05	2.42994e-05	2.35641e-05	2.3899e-05	2.33437e-05	8.03196e-05
14.1602	0.000248	1.96464e-05	1.93585e-05	1.97105e-05	1.9304e-05	1.94857e-05	1.9536e-05	1.99475e-05	2.02416e-05	4.46985e-05	4.17112e-05	1.76954e-05	1.78896e-05	1.81239e-05	1.79305e-05	1.77764e-05	4.05816e-05		2.64582e-05	2.13948e-05	2.16739e-05	2.14122e-05	2.12581e-05	2.24057e-05	2.18697e-05	2.20177e-05	2.01779e-05	2.15864e-05	2.19885e-05	2.22819e-05	2.15526e-05	2.18482e-05	2.13369e-05	7.46106e-05
14.6484	0.000255	1.83733e-05	1.81272e-05	1.84609e-05	1.80818e-05	1.82587e-05	1.83039e-05	1.86756e-05	1.88955e-05	4.35252e-05	4.00365e-05	1.64917e-05	1.66851e-05	1.69036e-05	1.66945e-05	1.65478e-05	3.93064e-05		2.48749e-05	1.99467e-05	2.021e-05	1.99418e-05	1.97996e-05	2.09571e-05	2.03752e-05	2.05349e-05	1.89421e-05	2.01079e-05	2.04899e-05	2.07896e-05	2.00745e-05	2.03189e-05	1.98395e-05	7.10356e-05
15.1367	0.000263	1.73139e-05	1.70871e-05	1.73884e-05	1.70494e-05	1.72046e-05	1.72603e-05	1.7617e-05	1.78428e-05	4.16544e-05	3.83816e-05	1.55283e-05	1.57082e-05	1.59005e-05	1.57286e-05	1.55742e-05	3.7702e-05		2.37108e-05	1.89519e-05	1.91966e-05	1.89481e-05	1.8824e-05	1.99582e-05	1.937e-05	1.95453e-05	1.80574e-05	1.90824e-05	1.94302e-05	1.97332e-05	1.90646e-05	1.92554e-05	1.88317e-05	6.93166e-05
15.625	0.000273	1.64411e-05	1.62276e-05	1.65163e-05	1.61871e-05	1.63519e-05	1.64029e-05	1.67232e-05	1.69894e-05	4.08601e-05	3.75631e-05	1.47306e-05	1.49296e-05	1.50862e-05	1.49213e-05	1.47844e-05	3.69346e-05		2.26984e-05	1.82208e-05	1.8468e-05	1.82323e-05	1.81313e-05	1.92184e-05	1.86456e-05	1.88048e-05	1.74633e-05	1.83878e-05	1.8662e-05	1.89778e-05	1.83583e-05	1.85181e-05	1.8126e-05	6.74445e-05
16.1133	0.000283	1.57998e-05	1.55976e-05	1.58949e-05	1.55535e-05	1.57258e-05	1.5769e-05	1.60653e-05	1.63467e-05	4.03455e-05	3.677e-05	1.416e-05	1.43513e-05	1.44984e-05	1.43575e-05	1.42107e-05	3.64227e-05		2.20633e-05	1.76584e-05	1.78847e-05	1.76549e-05	1.75893e-05	1.85884e-05	1.80784e-05	1.82333e-05	1.70144e-05	1.78662e-05	1.8136e-05	1.84019e-05	1.78059e-05	1.79762e-05	1.76252e-05	6.56077e-05
16.6016	0.000276	1.54029e-05	1.51881e-05	1.54901e-05	1.51465e-05	1.53197e-05	1.53566e-05	1.56584e-05	1.59791e-05	3.99573e-05	3.65411e-05	1.37974e-05	1.40004e-05	1.41325e-05	1.39763e-05	1.38505e-05	3.60591e-05		2.16924e-05	1.74578e-05	1.76772e-05	1.74673e-05	1.74014e-05	1.83658e-05	1.78835e-05	1.80187e-05	1.69418e-05	1.76876e-05	1.79318e-05	1.82248e-05	1.76352e-05	1.77895e-05	1.74632e-05	6.39022e-05
17.0898	0.000278	1.49892e-05	1.47833e-05	1.50889e-05	1.47411e-05	1.4911e-05	1.49623e-05	1.52355e-05	1.55791e-05	3.96221e-05	3.59151e-05	1.34129e-05	1.36427e-05	1.37605e-05	1.35627e-05	1.34559e-05	3.55762e-05		2.13949e-05	1.73424e-05	1.75666e-05	1.73463e-05	1.72982e-05	1.82112e-05	1.77579e-05	1.78925e-05	1.69608e-05	1.75598e-05	1.78274e-05	1.81443e-05	1.75429e-05	1.76782e-05	1.7353e-05	6.06619e-05
17.5781	0.000278	1.45063e-05	1.4306e-05	1.46076e-05	1.42685e-05	1.44269e-05	1.44909e-05	1.47575e-05	1.5114e-05	3.83626e-05	3.46132e-05	1.2977e-05	1.32098e-05	1.33204e-05	1.31361e-05	1.30067e-05	3.41707e-05		2.12427e-05	1.72091e-05	1.74392e-05	1.71972e-05	1.71646e-05	1.80498e-05	1.76136e-05	1.77304e-05	1.70426e-05	1.74547e-05	1.77358e-05	1.80068e-05	1.7426e-05	1.75738e-05	1.72467e-05	5.71595e-05
18.0664	0.000258	1.40218e-05	1.38331e-05	1.412e-05	1.37978e-05	1.3941e-05	1.40194e-05	1.42747e-05	1.4643e-05	3.71614e-05	3.3568e-05	1.25044e-05	1.27401e-05	1.28595e-05	1.26774e-05	1.25314e-05	3.27947e-05		2.09003e-05	1.7039e-05	1.72543e-05	1.70266e-05	1.70079e-05	1.78557e-05	1.74395e-05	1.75694e-05	1.68642e-05	1.72349e-05	1.75417e-05	1.77556e-05	1.72323e-05	1.73876e-05	1.70482e-05	5.47342e-05
18.5547	0.000249	1.3412e-05	1.32177e-05	1.34806e-05	1.31927e-05	1.33199e-05	1.33976e-05	1.3639e-05	1.4021e-05	3.48756e-05	3.17437e-05	1.19533e-05	1.21803e-05	1.22996e-05	1.21553e-05	1.1995e-05	3.09316e-05		2.03163e-05	1.65139e-05	1.67004e-05	1.64883e-05	1.64698e-05	1.72725e-05	1.68821e-05	1.70707e-05	1.63302e-05	1.66658e-05	1.69743e-05	1.71973e-05	1.66775e-05	1.68427e-05	1.64858e-05	5.22987e-05
19.043	0.000234	1.27073e-05	1.24944e-05	1.27293e-05	1.24849e-05	1.26014e-05	1.26509e-05	1.29124e-05	1.33272e-05	3.19611e-05	2.94573e-05	1.13629e-05	1.15469e-05	1.16604e-05	1.15672e-05	1.13862e-05	2.85276e-05		1.95035e-05	1.58922e-05	1.60663e-05	1.58883e-05	1.58619e-05	1.66494e-05	1.62517e-05	1.64114e-05	1.56722e-05	1.60785e-05	1.63642e-05	1.65327e-05	1.60582e-05	1.62607e-05	1.58857e-05	4.95644e-05
19.5312	0.000212	1.21332e-05	1.19089e-05	1.21249e-05	1.1913e-05	1.20282e-05	1.20509e-05	1.23622e-05	1.30166e-05	2.97272e-05	2.77311e-05	1.08523e-05	1.10416e-05	1.11433e-05	1.12384e-05	1.09216e-05	2.688e-05		1.84778e-05	1.50936e-05	1.52614e-05	1.50997e-05	1.509e-05	1.58203e-05	1.54356e-05	1.56132e-05	1.47379e-05	1.52735e-05	1.55454e-05	1.56869e-05	1.52517e-05	1.54743e-05	1.51058e-05	4.71448e-05
20.0195	0.000197	1.16512e-05	1.14188e-05	1.16257e-05	1.14332e-05	1.15493e-05	1.15736e-05	1.19141e-05	1.2936e-05	2.78642e-05	2.58963e-05	1.04476e-05	1.0626e-05	1.07344e-05	1.11414e-05	1.05683e-05	2.52337e-05		1.76776e-05	1.44037e-05	1.45592e-05	1.44333e-05	1.4416e-05	1.51282e-05	1.47271e-05	1.48982e-05	1.3952e-05	1.4587e-05	1.48338e-05	1.50052e-05	1.456e-05	1.47929e-05	1.44324e-05	4.45552e-05
20.5078	0.000186	1.12041e-05	1.09695e-05	1.11768e-05	1.09805e-05	1.11089e-05	1.1139e-05	1.14858e-05	1.25455e-05	2.64959e-05	2.42162e-05	1.008e-05	1.02343e-05	1.03494e-05	1.08322e-05	1.0204e-05	2.38511e-05		1.68032e-05	1.36941e-05	1.38687e-05	1.37702e-05	1.37514e-05	1.44046e-05	1.40257e-05	1.41247e-05	1.31666e-05	1.39031e-05	1.41321e-05	1.4289e-05	1.38628e-05	1.40948e-05	1.37423e-05	4.17068e-05
20.9961	0.000173	1.08672e-05	1.06594e-05	1.08642e-05	1.06655e-05	1.07993e-05	1.0825e-05	1.1154e-05	1.21849e-05	2.49752e-05	2.30688e-05	9.79598e-06	9.95044e-06	1.00478e-05	1.05384e-05	9.91998e-06	2.25927e-05		1.61149e-05	1.31227e-05	1.33083e-05	1.32303e-05	1.32207e-05	1.38135e-05	1.34533e-05	1.35378e-05	1.25555e-05	1.33692e-05	1.36026e-05	1.37119e-05	1.33175e-05	1.35633e-05	1.32273e-05	3.99952e-05
21.4844	0.000157	1.05311e-05	1.03245e-05	1.05268e-05	1.03338e-05	1.04705e-05	1.05009e-05	1.07905e-05	1.16139e-05	2.38056e-05	2.20919e-05	9.51791e-06	9.64381e-06	9.75035e-06	1.0125e-05	9.60807e-06	2.14072e-05		1.57413e-05	1.27993e-05	1.29784e-05	1.29136e-05	1.2903e-05	1.3469e-05	1.31442e-05	1.3217e-05	1.2137e-05	1.30554e-05	1.33074e-05	1.3402e-05	1.30164e-05	1.32434e-05	1.2935e-05	3.80872e-05
21.9727	0.000146	1.02414e-05	1.00305e-05	1.02172e-05	1.00422e-05	1.01768e-05	1.02007e-05	1.04358e-05	1.08649e-05	2.24206e-05	2.1181e-05	9.27852e-06	9.36547e-06	9.48187e-06	9.55327e-06	9.31578e-06	2.03798e-05		1.52803e-05	1.24536e-05	1.26549e-05	1.25875e-05	1.25944e-05	1.31178e-05	1.28239e-05	1.28668e-05	1.17115e-05	1.27288e-05	1.29598e-05	1.30629e-05	1.26823e-05	1.28962e-05	1.26032e-05	3.62079e-05
22.4609	0.000139	1.00724e-05	9.85658e-06	1.00287e-05	9.87041e-06	9.98342e-06	1.00074e-05	1.02234e-05	1.04387e-05	2.1185e-05	2.0119e-05	9.13443e-06	9.20378e-06	9.30447e-06	9.23286e-06	9.13552e-06	1.92241e-05		1.50246e-05	1.22736e-05	1.24576e-05	1.23843e-05	1.23955e-05	1.29194e-05	1.26583e-05	1.26777e-05	1.14567e-05	1.25519e-05	1.27892e-05	1.28775e-05	1.24928e-05	1.26939e-05	1.24202e-05	3.4713e-05
22.9492	0.000132	9.99129e-06	9.77053e-06	9.93337e-06	9.79192e-06	9.89128e-06	9.90738e-06	1.01266e-05	1.02958e-05	2.016e-05	1.91092e-05	9.06643e-06	9.14868e-06	9.23773e-06	9.15014e-06	9.07325e-06	1.81946e-05		1.47017e-05	1.2059e-05	1.22496e-05	1.2164e-05	1.21823e-05	1.26983e-05	1.24493e-05	1.24584e-05	1.11892e-05	1.23235e-05	1.25725e-05	1.2673e-05	1.22755e-05	1.24673e-05	1.21972e-05	3.39487e-05
23.4375	0.000129	1.00308e-05	9.80557e-06	9.9714e-06	9.8259e-06	9.91922e-06	9.93723e-06	1.0154e-05	1.02944e-05	1.92348e-05	1.83391e-05	9.10454e-06	9.1935e-06	9.2656e-06	9.17894e-06	9.10936e-06	1.74864e-05		1.44059e-05	1.18639e-05	1.20598e-05	1.19484e-05	1.19659e-05	1.24816e-05	1.22408e-05	1.22593e-05	1.0942e-05	1.20866e-05	1.23479e-05	1.24202e-05	1.2047e-05	1.22317e-05	1.1966e-05	3.31079e-05
23.9258	0.000128	1.01158e-05	9.90006e-06	1.00714e-05	9.91867e-06	1.00155e-05	1.00159e-05	1.02397e-05	1.03617e-05	1.8776e-05	1.75589e-05	9.17392e-06	9.25967e-06	9.33169e-06	9.23471e-06	9.16087e-06	1.68548e-05		1.4215e-05	1.17553e-05	1.19283e-05	1.18273e-05	1.18344e-05	1.23674e-05	1.21034e-05	1.21495e-05	1.07717e-05	1.19449e-05	1.22241e-05	1.22794e-05	1.1914e-05	1.21262e-05	1.18542e-05	3.1947e-05
24.4141	0.000125	1.01278e-05	9.91395e-06	1.0092e-05	9.93152e-06	1.00296e-05	1.00276e-05	1.02531e-05	1.03799e-05	1.79962e-05	1.67661e-05	9.16486e-06	9.26542e-06	9.33568e-06	9.21765e-06	9.15283e-06	1.64128e-05		1.41071e-05	1.17067e-05	1.18949e-05	1.17772e-05	1.17801e-05	1.23142e-05	1.2033e-05	1.20877e-05	1.06573e-05	1.18405e-05	1.21214e-05	1.21875e-05	1.18421e-05	1.20435e-05	1.17857e-05	3.11365e-05
24.9023	0.000126	1.01288e-05	9.91458e-06	1.01004e-05	9.92859e-06	1.00289e-05	1.00431e-05	1.02652e-05	1.03945e-05	1.78104e-05	1.65508e-05	9.15802e-06	9.25104e-06	9.33452e-06	9.22153e-06	9.1433e-06	1.63171e-05		1.40236e-05	1.16272e-05	1.1814e-05	1.16989e-05	1.17115e-05	1.22237e-05	1.19441e-05	1.2016e-05	1.05639e-05	1.17553e-05	1.20414e-05	1.20776e-05	1.17623e-05	1.19854e-05	1.17208e-05	3.01018e-05
25.3906	0.000128	1.00152e-05	9.79629e-06	9.98649e-06	9.80311e-06	9.89851e-06	9.92364e-06	1.01493e-05	1.02808e-05	1.77577e-05	1.64066e-05	9.06755e-06	9.12471e-06	9.22771e-06	9.1504e-06	9.05398e-06	1.62934e-05		1.39407e-05	1.16168e-05	1.17865e-05	1.16895e-05	1.16985e-05	1.21937e-05	1.19228e-05	1.2e-05	1.05758e-05	1.17501e-05	1.20324e-05	1.20593e-05	1.17453e-05	1.19852e-05	1.17195e-05	2.91652e-05
25.8789	0.000124	9.79574e-06	9.55603e-06	9.73674e-06	9.55816e-06	9.6436e-06	9.68432e-06	9.915e-06	1.00575e-05	1.75542e-05	1.61272e-05	8.8803e-06	8.92163e-06	9.02575e-06	8.96446e-06	8.87396e-06	1.61357e-05		1.37317e-05	1.15181e-05	1.16899e-05	1.16054e-05	1.16012e-05	1.20561e-05	1.182e-05	1.18859e-05	1.05033e-05	1.16573e-05	1.19176e-05	1.19651e-05	1.16535e-05	1.18822e-05	1.16188e-05	2.86983e-05
26.3672	0.000123	9.581e-06	9.32426e-06	9.49712e-06	9.33069e-06	9.39682e-06	9.44856e-06	9.69089e-06	9.82667e-06	1.72651e-05	1.58118e-05	8.69604e-06	8.74052e-06	8.8345e-06	8.77795e-06	8.69881e-06	1.58215e-05		1.34083e-05	1.1258e-05	1.14163e-05	1.13312e-05	1.13353e-05	1.1766e-05	1.15549e-05	1.16133e-05	1.03587e-05	1.14298e-05	1.16834e-05	1.17152e-05	1.14142e-05	1.16389e-05	1.13745e-05	2.81379e-05
26.8555	0.000119	9.3296e-06	9.06413e-06	9.23383e-06	9.06896e-06	9.1301e-06	9.18304e-06	9.4305e-06	9.57613e-06	1.67202e-05	1.53989e-05	8.46475e-06	8.51268e-06	8.59325e-06	8.53493e-06	8.46614e-06	1.54408e-05		1.31401e-05	1.105e-05	1.12024e-05	1.11184e-05	1.11137e-05	1.15245e-05	1.13262e-05	1.1394e-05	1.025e-05	1.12234e-05	1.14644e-05	1.15071e-05	1.12119e-05	1.14055e-05	1.11594e-05	2.7775e-05
27.3438	0.000113	9.13433e-06	8.86972e-06	9.02803e-06	8.87412e-06	8.9338e-06	8.98239e-06	9.23184e-06	9.37457e-06	1.60044e-05	1.47773e-05	8.29086e-06	8.33789e-06	8.41009e-06	8.34408e-06	8.27686e-06	1.47313e-05		1.29278e-05	1.08987e-05	1.10512e-05	1.09661e-05	1.09569e-05	1.13516e-05	1.1162e-05	1.12236e-05	1.01571e-05	1.1089e-05	1.13232e-05	1.13591e-05	1.10667e-05	1.12569e-05	1.10127e-05	2.70642e-05
27.832	0.000114	8.94419e-06	8.67987e-06	8.83421e-06	8.68692e-06	8.74081e-06	8.78683e-06	9.03075e-06	9.184e-06	1.54907e-05	1.43643e-05	8.1094e-06	8.15739e-06	8.23199e-06	8.17025e-06	8.09283e-06	1.42101e-05		1.27589e-05	1.07708e-05	1.09217e-05	1.08297e-05	1.08261e-05	1.12195e-05	1.10338e-05	1.10916e-05	1.00692e-05	1.09609e-05	1.12024e-05	1.12092e-05	1.09354e-05	1.11311e-05	1.08924e-05	2.61386e-05
28.3203	0.00011	8.78707e-06	8.52349e-06	8.67179e-06	8.53821e-06	8.58568e-06	8.63058e-06	8.86465e-06	9.02613e-06	1.49423e-05	1.3905e-05	7.96863e-06	8.01649e-06	8.09281e-06	8.03163e-06	7.94733e-06	1.37041e-05		1.26394e-05	1.0677e-05	1.08418e-05	1.07607e-05	1.07599e-05	1.11379e-05	1.09486e-05	1.09849e-05	1.00519e-05	1.08979e-05	1.11377e-05	1.11063e-05	1.08556e-05	1.10696e-05	1.08281e-05	2.5043e-05
28.8086	0.000105	8.61894e-06	8.36707e-06	8.50846e-06	8.39226e-06	8.42671e-06	8.46538e-06	8.69547e-06	8.84326e-06	1.44647e-05	1.35653e-05	7.82538e-06	7.87026e-06	7.95114e-06	7.88752e-06	7.80559e-06	1.31536e-05		1.24978e-05	1.05571e-05	1.07231e-05	1.06617e-05	1.06525e-05	1.10084e-05	1.0825e-05	1.08399e-05	9.96677e-06	1.07803e-05	1.10312e-05	1.09693e-05	1.07279e-05	1.09507e-05	1.07121e-05	2.34046e-05
29.2969	0.000102	8.36569e-06	8.12492e-06	8.26189e-06	8.15154e-06	8.18488e-06	8.21837e-06	8.43824e-06	8.56893e-06	1.40912e-05	1.31827e-05	7.5961e-06	7.63847e-06	7.72309e-06	7.66239e-06	7.58133e-06	1.2861e-05		1.22347e-05	1.03669e-05	1.05353e-05	1.04798e-05	1.04713e-05	1.08193e-05	1.06373e-05	1.06404e-05	9.86707e-06	1.0597e-05	1.08395e-05	1.07811e-05	1.05476e-05	1.0756e-05	1.05237e-05	2.24562e-05
29.7852	9.47661e-05	8.105e-06	7.8717e-06	8.00878e-06	7.89746e-06	7.93268e-06	7.96175e-06	8.17444e-06	8.29992e-06	1.33402e-05	1.2678e-05	7.36456e-06	7.4e-06	7.49294e-06	7.42579e-06	7.35163e-06	1.23503e-05		1.19708e-05	1.01753e-05	1.03418e-05	1.02852e-05	1.02782e-05	1.06e-05	1.04392e-05	1.04411e-05	9.79634e-06	1.04213e-05	1.06417e-05	1.0589e-05	1.03748e-05	1.05754e-05	1.03441e-05	2.17704e-05
30.2734	8.68534e-05	7.88813e-06	7.66454e-06	7.80407e-06	7.68668e-06	7.73564e-06	7.75769e-06	7.96663e-06	8.08035e-06	1.24769e-05	1.2114e-05	7.1747e-06	7.21577e-06	7.2958e-06	7.23125e-06	7.16273e-06	1.17656e-05		1.17467e-05	9.98174e-06	1.01393e-05	1.00786e-05	1.00759e-05	1.03867e-05	1.02247e-05	1.02468e-05	9.65095e-06	1.02111e-05	1.04363e-05	1.03868e-05	1.01676e-05	1.03747e-05	1.01326e-05	2.12977e-05
30.7617	8.55779e-05	7.67111e-06	7.45652e-06	7.59998e-06	7.47104e-06	7.54151e-06	7.56085e-06	7.7525e-06	7.85952e-06	1.18654e-05	1.15685e-05	6.98046e-06	7.03061e-06	7.11003e-06	7.03268e-06	6.96837e-06	1.12601e-05		1.14065e-05	9.70525e-06	9.85149e-06	9.79127e-06	9.79052e-06	1.00937e-05	9.94757e-06	9.97168e-06	9.46664e-06	9.91398e-06	1.01278e-05	1.01018e-05	9.879e-06	1.0082e-05	9.83375e-06	2.09651e-05
31.25	8.4097e-05	7.46881e-06	7.26685e-06	7.40903e-06	7.27993e-06	7.35733e-06	7.38441e-06	7.55461e-06	7.66759e-06	1.13286e-05	1.10745e-05	6.80353e-06	6.85662e-06	6.93248e-06	6.8492e-06	6.79745e-06	1.08686e-05		1.12424e-05	9.50005e-06	9.63532e-06	9.56375e-06	9.56866e-06	9.88768e-06	9.73668e-06	9.78244e-06	9.31431e-06	9.71856e-06	9.91378e-06	9.87915e-06	9.67051e-06	9.87612e-06	9.62918e-06	2.05108e-05
31.7383	8.08528e-05	7.20633e-06	7.00766e-06	7.14557e-06	7.01943e-06	7.09693e-06	7.12652e-06	7.29061e-06	7.40037e-06	1.08968e-05	1.05865e-05	6.55938e-06	6.61552e-06	6.68685e-06	6.59693e-06	6.55966e-06	1.04237e-05		1.09309e-05	9.23085e-06	9.36034e-06	9.29085e-06	9.28589e-06	9.60172e-06	9.46222e-06	9.50764e-06	9.09404e-06	9.43774e-06	9.62985e-06	9.60355e-06	9.38422e-06	9.58931e-06	9.34842e-06	1.98506e-05
32.2266	8.06702e-05	6.99768e-06	6.81123e-06	6.94252e-06	6.82342e-06	6.8972e-06	6.93222e-06	7.08485e-06	7.20301e-06	1.08089e-05	1.037e-05	6.36968e-06	6.42267e-06	6.50012e-06	6.40816e-06	6.37268e-06	1.01966e-05		1.06066e-05	8.97758e-06	9.09717e-06	9.04039e-06	9.02709e-06	9.33494e-06	9.20863e-06	9.22999e-06	8.87283e-06	9.17285e-06	9.34927e-06	9.34218e-06	9.11485e-06	9.31801e-06	9.08717e-06	1.93462e-05
32.7148	7.92417e-05	6.78511e-06	6.60126e-06	6.72591e-06	6.61018e-06	6.67794e-06	6.71702e-06	6.86285e-06	6.98802e-06	1.08885e-05	1.03074e-05	6.17602e-06	6.22234e-06	6.28935e-06	6.21038e-06	6.18972e-06	1.01124e-05		1.0373e-05	8.79011e-06	8.91436e-06	8.85664e-06	8.84187e-06	9.14564e-06	9.02982e-06	9.02718e-06	8.77857e-06	9.02275e-06	9.17395e-06	9.16049e-06	8.94102e-06	9.1371e-06	8.9218e-06	1.92419e-05
33.2031	7.6851e-05	6.61479e-06	6.42333e-06	6.54055e-06	6.43422e-06	6.49568e-06	6.52697e-06	6.68612e-06	6.81266e-06	1.09662e-05	1.01501e-05	6.0261e-06	6.06646e-06	6.11825e-06	6.066e-06	6.03759e-06	1.00751e-05		1.01333e-05	8.60423e-06	8.73245e-06	8.67876e-06	8.6605e-06	8.95963e-06	8.84816e-06	8.83333e-06	8.61213e-06	8.82606e-06	8.99439e-06	8.96385e-06	8.75102e-06	8.9486e-06	8.73691e-06	1.9295e-05
33.6914	7.47814e-05	6.45865e-06	6.27579e-06	6.38169e-06	6.2877e-06	6.34144e-06	6.36051e-06	6.52279e-06	6.65597e-06	1.09443e-05	1.00132e-05	5.91198e-06	5.92483e-06	5.97195e-06	5.95412e-06	5.91134e-06	9.88378e-06		9.86667e-06	8.41464e-06	8.5335e-06	8.48418e-06	8.47045e-06	8.76607e-06	8.65833e-06	8.62061e-06	8.47675e-06	8.6477e-06	8.81817e-06	8.77622e-06	8.56454e-06	8.75647e-06	8.54929e-06	1.91101e-05
34.1797	7.27937e-05	6.38921e-06	6.21814e-06	6.32136e-06	6.2313e-06	6.27449e-06	6.29216e-06	6.45357e-06	6.5758e-06	1.06681e-05	9.8925e-06	5.85389e-06	5.85914e-06	5.89015e-06	5.89342e-06	5.84166e-06	9.70697e-06		9.62431e-06	8.20106e-06	8.32166e-06	8.26681e-06	8.24908e-06	8.54974e-06	8.44234e-06	8.41262e-06	8.32288e-06	8.45029e-06	8.61364e-06	8.55805e-06	8.35832e-06	8.54373e-06	8.34129e-06	1.88821e-05
34.668	7.01511e-05	6.29136e-06	6.12061e-06	6.22413e-06	6.13829e-06	6.16733e-06	6.19153e-06	6.34859e-06	6.45953e-06	1.05543e-05	9.71682e-06	5.79954e-06	5.78007e-06	5.80841e-06	5.84247e-06	5.77526e-06	9.62148e-06		9.44823e-06	8.01299e-06	8.11632e-06	8.04671e-06	8.03727e-06	8.34939e-06	8.23032e-06	8.23608e-06	8.1155e-06	8.23295e-06	8.4154e-06	8.36041e-06	8.15938e-06	8.33909e-06	8.14971e-06	1.82006e-05
35.1562	7.13422e-05	6.24577e-06	6.08755e-06	6.18918e-06	6.10135e-06	6.12069e-06	6.14994e-06	6.30394e-06	6.41813e-06	1.0422e-05	9.62191e-06	5.75276e-06	5.72823e-06	5.76811e-06	5.79424e-06	5.72356e-06	9.4189e-06		9.31293e-06	7.85128e-06	7.94848e-06	7.8596e-06	7.85175e-06	8.17209e-06	8.04046e-06	8.07741e-06	7.98504e-06	8.05467e-06	8.23134e-06	8.19814e-06	7.98057e-06	8.1646e-06	7.98472e-06	1.78609e-05
35.6445	7.11049e-05	6.2128e-06	6.06148e-06	6.16597e-06	6.06819e-06	6.09364e-06	6.12628e-06	6.27086e-06	6.37224e-06	1.01327e-05	9.39054e-06	5.73062e-06	5.68876e-06	5.73843e-06	5.76692e-06	5.69742e-06	9.21533e-06		9.09309e-06	7.64683e-06	7.74565e-06	7.65273e-06	7.63437e-06	7.94671e-06	7.81912e-06	7.87293e-06	7.78624e-06	7.84272e-06	8.01889e-06	7.97563e-06	7.76752e-06	7.97223e-06	7.78844e-06	1.74279e-05
36.1328	7.0003e-05	6.13675e-06	5.98356e-06	6.08977e-06	5.98823e-06	6.01204e-06	6.0531e-06	6.19179e-06	6.29668e-06	1.00631e-05	9.25524e-06	5.66492e-06	5.61407e-06	5.67722e-06	5.70569e-06	5.62913e-06	8.98962e-06		8.96593e-06	7.56751e-06	7.66061e-06	7.56505e-06	7.55175e-06	7.86544e-06	7.7194e-06	7.77315e-06	7.72201e-06	7.75734e-06	7.93166e-06	7.88237e-06	7.68144e-06	7.88906e-06	7.71286e-06	1.71485e-05
36.6211	6.79488e-05	6.06104e-06	5.90578e-06	6.01314e-06	5.90779e-06	5.93843e-06	5.97977e-06	6.1129e-06	6.22797e-06	9.81657e-06	8.90753e-06	5.59702e-06	5.53941e-06	5.61022e-06	5.64153e-06	5.56763e-06	8.65924e-06		8.90206e-06	7.48752e-06	7.57636e-06	7.48194e-06	7.46872e-06	7.7705e-06	7.63278e-06	7.69392e-06	7.65559e-06	7.69675e-06	7.87759e-06	7.79275e-06	7.6043e-06	7.83815e-06	7.6562e-06	1.69804e-05
37.1094	6.62751e-05	5.98076e-06	5.82623e-06	5.93684e-06	5.82842e-06	5.86628e-06	5.8996e-06	6.03646e-06	6.14008e-06	9.49826e-06	8.7562e-06	5.52879e-06	5.46529e-06	5.53631e-06	5.57561e-06	5.49729e-06	8.44509e-06		8.78372e-06	7.40281e-06	7.48549e-06	7.39608e-06	7.37974e-06	7.68373e-06	7.54886e-06	7.60504e-06	7.6046e-06	7.64342e-06	7.82178e-06	7.72784e-06	7.53233e-06	7.78495e-06	7.59654e-06	1.67747e-05
37.5977	6.19213e-05	5.8649e-06	5.70767e-06	5.81666e-06	5.71251e-06	5.74865e-06	5.78167e-06	5.91969e-06	6.0258e-06	9.10443e-06	8.39329e-06	5.4157e-06	5.35983e-06	5.43471e-06	5.46889e-06	5.39066e-06	8.05986e-06		8.74337e-06	7.38898e-06	7.46467e-06	7.36539e-06	7.3477e-06	7.64197e-06	7.53616e-06	7.56923e-06	7.58157e-06	7.65962e-06	7.82536e-06	7.72821e-06	7.52609e-06	7.78062e-06	7.6013e-06	1.62226e-05
38.0859	5.86336e-05	5.74015e-06	5.57814e-06	5.68447e-06	5.58489e-06	5.62546e-06	5.64612e-06	5.78687e-06	5.91117e-06	8.72817e-06	8.10774e-06	5.30425e-06	5.24005e-06	5.31846e-06	5.35581e-06	5.28334e-06	7.74871e-06		8.71697e-06	7.36856e-06	7.43935e-06	7.33341e-06	7.30895e-06	7.61912e-06	7.51311e-06	7.55328e-06	7.53359e-06	7.65464e-06	7.82949e-06	7.69447e-06	7.50642e-06	7.78132e-06	7.60128e-06	1.58661e-05
38.5742	5.7383e-05	5.56453e-06	5.39532e-06	5.49536e-06	5.40395e-06	5.44083e-06	5.45685e-06	5.60628e-06	5.73938e-06	8.37187e-06	7.9001e-06	5.14854e-06	5.07652e-06	5.15285e-06	5.206e-06	5.12899e-06	7.58456e-06		8.6251e-06	7.30981e-06	7.37088e-06	7.2629e-06	7.23906e-06	7.5529e-06	7.46086e-06	7.51115e-06	7.43707e-06	7.60228e-06	7.77322e-06	7.64122e-06	7.46e-06	7.73541e-06	7.55057e-06	1.54098e-05
39.0625	5.61109e-05	5.39323e-06	5.22097e-06	5.32098e-06	5.2262e-06	5.26745e-06	5.28309e-06	5.43193e-06	5.60255e-06	8.23151e-06	7.62618e-06	4.99375e-06	4.91635e-06	4.99574e-06	5.07384e-06	4.98472e-06	7.40784e-06		8.44609e-06	7.18312e-06	7.23771e-06	7.14365e-06	7.11467e-06	7.41994e-06	7.33727e-06	7.39073e-06	7.29794e-06	7.47932e-06	7.64023e-06	7.49777e-06	7.34093e-06	7.62017e-06	7.42698e-06	1.49592e-05
39.5508	5.50429e-05	5.18668e-06	5.01931e-06	5.11924e-06	5.02871e-06	5.07456e-06	5.08231e-06	5.22675e-06	5.42162e-06	8.01402e-06	7.42617e-06	4.81437e-06	4.73827e-06	4.80839e-06	4.91021e-06	4.80503e-06	7.33629e-06		8.2576e-06	7.01155e-06	7.05663e-06	6.9705e-06	6.94674e-06	7.25667e-06	7.1684e-06	7.22647e-06	7.11126e-06	7.28605e-06	7.46409e-06	7.31231e-06	7.15335e-06	7.44151e-06	7.23948e-06	1.45693e-05
40.0391	5.50369e-05	4.98915e-06	4.83588e-06	4.93503e-06	4.84567e-06	4.89379e-06	4.89895e-06	5.03565e-06	5.27293e-06	7.76081e-06	7.32165e-06	4.6292e-06	4.57154e-06	4.63991e-06	4.75304e-06	4.63314e-06	7.22479e-06		8.03178e-06	6.80067e-06	6.84191e-06	6.75926e-06	6.7388e-06	7.02897e-06	6.94949e-06	7.01826e-06	6.89247e-06	7.06907e-06	7.24582e-06	7.09835e-06	6.93809e-06	7.23774e-06	7.02033e-06	1.43477e-05
40.5273	5.3458e-05	4.85137e-06	4.70036e-06	4.79644e-06	4.71039e-06	4.75896e-06	4.76562e-06	4.89937e-06	5.21209e-06	7.6732e-06	7.21854e-06	4.49932e-06	4.45595e-06	4.51841e-06	4.70798e-06	4.52872e-06	7.17872e-06		7.77851e-06	6.57788e-06	6.6195e-06	6.54893e-06	6.52684e-06	6.80787e-06	6.72312e-06	6.78408e-06	6.68226e-06	6.86401e-06	7.04559e-06	6.87333e-06	6.71345e-06	7.01641e-06	6.80098e-06	1.40138e-05
41.0156	5.18701e-05	4.70775e-06	4.57758e-06	4.67266e-06	4.58878e-06	4.63725e-06	4.63958e-06	4.76939e-06	5.10914e-06	7.63826e-06	7.21617e-06	4.34919e-06	4.32434e-06	4.37947e-06	4.61608e-06	4.39464e-06	7.15984e-06		7.57354e-06	6.39491e-06	6.44223e-06	6.36957e-06	6.34718e-06	6.61301e-06	6.52984e-06	6.58331e-06	6.45249e-06	6.66344e-06	6.84598e-06	6.67574e-06	6.51491e-06	6.80559e-06	6.6016e-06	1.37548e-05
41.5039	5.06304e-05	4.55517e-06	4.43596e-06	4.5291e-06	4.44411e-06	4.48966e-06	4.49836e-06	4.61862e-06	4.9384e-06	7.57651e-06	7.06882e-06	4.19457e-06	4.18389e-06	4.23207e-06	4.45626e-06	4.24263e-06	7.06185e-06		7.36051e-06	6.21029e-06	6.26228e-06	6.19304e-06	6.17365e-06	6.41195e-06	6.34286e-06	6.38499e-06	6.24085e-06	6.46972e-06	6.63227e-06	6.48059e-06	6.32075e-06	6.59441e-06	6.39732e-06	1.34065e-05
41.9922	4.99956e-05	4.41077e-06	4.30733e-06	4.39734e-06	4.31119e-06	4.35442e-06	4.37098e-06	4.48172e-06	4.77364e-06	7.38805e-06	6.9271e-06	4.04249e-06	4.04903e-06	4.08943e-06	4.30913e-06	4.09687e-06	6.98092e-06		7.11969e-06	5.97805e-06	6.03871e-06	5.97934e-06	5.95563e-06	6.1676e-06	6.10572e-06	6.13979e-06	5.98514e-06	6.22447e-06	6.37145e-06	6.2396e-06	6.08013e-06	6.31952e-06	6.13537e-06	1.30989e-05
42.4805	4.87607e-05	4.26799e-06	4.17344e-06	4.26037e-06	4.17388e-06	4.21289e-06	4.23659e-06	4.34067e-06	4.55397e-06	7.09619e-06	6.65863e-06	3.90598e-06	3.91684e-06	3.95016e-06	4.11064e-06	3.94064e-06	6.70289e-06		6.94156e-06	5.82514e-06	5.89345e-06	5.84025e-06	5.80667e-06	6.01017e-06	5.9521e-06	5.97471e-06	5.76956e-06	6.02951e-06	6.17244e-06	6.08601e-06	5.90246e-06	6.1275e-06	5.95175e-06	1.30072e-05
42.9688	4.74797e-05	4.14993e-06	4.06604e-06	4.14759e-06	4.06556e-06	4.09907e-06	4.12325e-06	4.21492e-06	4.36787e-06	6.69955e-06	6.37793e-06	3.78013e-06	3.814e-06	3.83751e-06	3.88583e-06	3.79588e-06	6.40997e-06		6.72137e-06	5.60495e-06	5.67189e-06	5.61738e-06	5.59603e-06	5.78553e-06	5.7357e-06	5.75363e-06	5.50018e-06	5.77814e-06	5.91031e-06	5.85006e-06	5.66503e-06	5.87669e-06	5.70519e-06	1.27292e-05
43.457	4.62991e-05	4.03782e-06	3.96104e-06	4.03542e-06	3.96238e-06	3.99659e-06	4.01442e-06	4.10166e-06	4.2339e-06	6.4473e-06	6.24487e-06	3.6714e-06	3.71164e-06	3.73685e-06	3.7417e-06	3.67598e-06	6.19782e-06		6.50336e-06	5.41522e-06	5.48506e-06	5.42868e-06	5.40791e-06	5.60386e-06	5.54056e-06	5.5598e-06	5.26154e-06	5.56766e-06	5.69946e-06	5.65301e-06	5.4629e-06	5.66396e-06	5.50504e-06	1.26229e-05
43.9453	4.50202e-05	3.93311e-06	3.86493e-06	3.93577e-06	3.86897e-06	3.89809e-06	3.9102e-06	3.99233e-06	4.11016e-06	6.40436e-06	6.25761e-06	3.57049e-06	3.61572e-06	3.63906e-06	3.62743e-06	3.57138e-06	6.10695e-06		6.30478e-06	5.26549e-06	5.33407e-06	5.28601e-06	5.26185e-06	5.45691e-06	5.38659e-06	5.40718e-06	5.05523e-06	5.39101e-06	5.52033e-06	5.49842e-06	5.30321e-06	5.49013e-06	5.34018e-06	1.24572e-05
44.4336	4.33935e-05	3.81418e-06	3.75737e-06	3.82739e-06	3.76049e-06	3.79412e-06	3.80085e-06	3.87307e-06	3.97133e-06	6.37849e-06	6.2433e-06	3.45841e-06	3.51174e-06	3.52917e-06	3.48836e-06	3.45663e-06	6.0368e-06		6.09588e-06	5.10623e-06	5.17311e-06	5.12035e-06	5.10387e-06	5.31567e-06	5.22019e-06	5.23555e-06	4.86326e-06	5.21221e-06	5.33674e-06	5.32079e-06	5.12855e-06	5.30483e-06	5.15902e-06	1.21082e-05
44.9219	4.26673e-05	3.7221e-06	3.68029e-06	3.75341e-06	3.68006e-06	3.72186e-06	3.72312e-06	3.78496e-06	3.84913e-06	6.20491e-06	6.07047e-06	3.35508e-06	3.41738e-06	3.43484e-06	3.36979e-06	3.35073e-06	5.90629e-06		5.96279e-06	4.99532e-06	5.0642e-06	5.00951e-06	4.99444e-06	5.20253e-06	5.10426e-06	5.11233e-06	4.69969e-06	5.06732e-06	5.19888e-06	5.19109e-06	5.00401e-06	5.16663e-06	5.02375e-06	1.1808e-05
45.4102	4.26857e-05	3.6263e-06	3.59106e-06	3.66932e-06	3.58696e-06	3.63882e-06	3.63425e-06	3.68738e-06	3.74014e-06	5.97711e-06	5.88983e-06	3.25437e-06	3.32146e-06	3.33885e-06	3.26547e-06	3.25178e-06	5.75511e-06		5.82823e-06	4.89006e-06	4.95881e-06	4.91403e-06	4.89149e-06	5.09518e-06	4.99029e-06	4.99522e-06	4.56327e-06	4.9358e-06	5.0608e-06	5.06722e-06	4.87897e-06	5.03111e-06	4.89195e-06	1.16565e-05
45.8984	4.04885e-05	3.56507e-06	3.54227e-06	3.62148e-06	3.53682e-06	3.59176e-06	3.58632e-06	3.63537e-06	3.66742e-06	5.8137e-06	5.6721e-06	3.19295e-06	3.25958e-06	3.28226e-06	3.19956e-06	3.1866e-06	5.66678e-06		5.72005e-06	4.80923e-06	4.87626e-06	4.83312e-06	4.80998e-06	5.01404e-06	4.90299e-06	4.89912e-06	4.42452e-06	4.83356e-06	4.95833e-06	4.96228e-06	4.78663e-06	4.93619e-06	4.79218e-06	1.14276e-05
46.3867	3.90772e-05	3.47843e-06	3.46015e-06	3.54192e-06	3.45411e-06	3.51098e-06	3.49879e-06	3.54892e-06	3.57268e-06	5.7036e-06	5.49184e-06	3.10717e-06	3.17457e-06	3.19612e-06	3.10962e-06	3.1043e-06	5.56892e-06		5.62667e-06	4.72644e-06	4.79239e-06	4.74259e-06	4.72501e-06	4.92876e-06	4.81656e-06	4.80131e-06	4.28604e-06	4.73706e-06	4.85707e-06	4.86381e-06	4.7015e-06	4.84298e-06	4.70055e-06	1.11165e-05
46.875	3.88089e-05	3.42289e-06	3.40526e-06	3.48909e-06	3.40391e-06	3.45731e-06	3.44519e-06	3.49383e-06	3.51546e-06	5.69198e-06	5.40243e-06	3.05862e-06	3.12318e-06	3.13903e-06	3.05464e-06	3.0538e-06	5.49103e-06		5.50773e-06	4.62406e-06	4.69269e-06	4.65022e-06	4.62751e-06	4.82396e-06	4.71489e-06	4.70254e-06	4.14495e-06	4.63019e-06	4.74902e-06	4.75291e-06	4.59385e-06	4.72811e-06	4.59639e-06	1.08838e-05
47.3633	3.92605e-05	3.35693e-06	3.33815e-06	3.41826e-06	3.33929e-06	3.38233e-06	3.38034e-06	3.42788e-06	3.46181e-06	5.76782e-06	5.46975e-06	2.99978e-06	3.06507e-06	3.08148e-06	3.00048e-06	2.99974e-06	5.49755e-06		5.4122e-06	4.54543e-06	4.61372e-06	4.5817e-06	4.55368e-06	4.74093e-06	4.62913e-06	4.60907e-06	4.01852e-06	4.53291e-06	4.65523e-06	4.66524e-06	4.50615e-06	4.62507e-06	4.50564e-06	1.0537e-05
47.8516	3.88142e-05	3.29136e-06	3.26969e-06	3.34415e-06	3.2709e-06	3.30807e-06	3.31065e-06	3.36005e-06	3.40985e-06	5.63055e-06	5.34011e-06	2.93985e-06	3.00822e-06	3.01504e-06	2.93965e-06	2.93968e-06	5.27404e-06		5.30069e-06	4.44904e-06	4.51598e-06	4.47438e-06	4.45222e-06	4.62749e-06	4.52817e-06	4.50808e-06	3.88527e-06	4.42983e-06	4.55505e-06	4.56652e-06	4.4039e-06	4.51982e-06	4.40617e-06	1.03699e-05
48.3398	3.90139e-05	3.25773e-06	3.23188e-06	3.30249e-06	3.23461e-06	3.27162e-06	3.27398e-06	3.32158e-06	3.3832e-06	5.52632e-06	5.25812e-06	2.90636e-06	2.97951e-06	2.97899e-06	2.91019e-06	2.90529e-06	5.08209e-06		5.22036e-06	4.36807e-06	4.43382e-06	4.39837e-06	4.36959e-06	4.53397e-06	4.44439e-06	4.43854e-06	3.79e-06	4.35343e-06	4.48406e-06	4.48565e-06	4.31971e-06	4.44232e-06	4.331e-06	1.03422e-05
48.8281	3.83361e-05	3.27864e-06	3.2197e-06	3.28117e-06	3.21928e-06	3.25117e-06	3.25342e-06	3.31075e-06	3.42889e-06	5.47464e-06	5.22914e-06	2.89079e-06	2.99876e-06	2.96794e-06	2.89919e-06	2.88343e-06	5.12383e-06		5.42908e-06	4.35139e-06	4.41213e-06	4.36728e-06	4.33365e-06	4.51342e-06	4.41089e-06	4.4698e-06	3.73649e-06	4.3289e-06	4.47879e-06	4.48177e-06	4.31767e-06	4.4428e-06	4.29823e-06	1.15564e-05
49.3164	3.84788e-05	3.4139e-06	3.23122e-06	3.28915e-06	3.22386e-06	3.24941e-06	3.24795e-06	3.32222e-06	3.6256e-06	5.79462e-06	5.49967e-06	2.91314e-06	3.11111e-06	2.97687e-06	2.93051e-06	2.88062e-06	5.64931e-06		6.18304e-06	4.42167e-06	4.45563e-06	4.3912e-06	4.35004e-06	4.57328e-06	4.45877e-06	4.66765e-06	3.80593e-06	4.38905e-06	4.61369e-06	4.59162e-06	4.4368e-06	4.58243e-06	4.3356e-06	1.56417e-05
49.8047	3.79719e-05	3.40218e-06	3.21396e-06	3.27577e-06	3.20602e-06	3.23887e-06	3.22688e-06	3.30253e-06	3.61327e-06	5.81568e-06	5.49111e-06	2.89553e-06	3.10471e-06	2.95825e-06	2.90778e-06	2.85846e-06	5.68866e-06		6.16956e-06	4.35392e-06	4.39172e-06	4.33046e-06	4.29162e-06	4.52858e-06	4.39555e-06	4.6237e-06	3.71778e-06	4.31868e-06	4.54391e-06	4.52133e-06	4.37094e-06	4.50873e-06	4.25946e-06	1.58015e-05
50.293	3.67222e-05	3.33216e-06	3.14972e-06	3.21695e-06	3.14034e-06	3.18062e-06	3.17058e-06	3.23921e-06	3.53996e-06	5.66295e-06	5.44187e-06	2.82957e-06	3.0416e-06	2.89476e-06	2.84615e-06	2.79603e-06	5.64564e-06		6.14135e-06	4.32821e-06	4.36888e-06	4.31195e-06	4.2738e-06	4.50462e-06	4.37001e-06	4.60271e-06	3.65875e-06	4.28945e-06	4.51081e-06	4.50106e-06	4.34271e-06	4.47901e-06	4.23072e-06	1.55574e-05
50.7812	3.56836e-05	3.25703e-06	3.0804e-06	3.1512e-06	3.07086e-06	3.11114e-06	3.10099e-06	3.16609e-06	3.46476e-06	5.51009e-06	5.33528e-06	2.76036e-06	2.97235e-06	2.83229e-06	2.78174e-06	2.73457e-06	5.53308e-06		6.04705e-06	4.27857e-06	4.32428e-06	4.26918e-06	4.22723e-06	4.45384e-06	4.31874e-06	4.53789e-06	3.58666e-06	4.24042e-06	4.4524e-06	4.4475e-06	4.29175e-06	4.41509e-06	4.18156e-06	1.5129e-05
51.2695	3.29643e-05	2.97497e-06	2.94863e-06	3.02516e-06	2.94821e-06	3.00579e-06	2.99324e-06	3.03675e-06	3.10202e-06	4.84005e-06	4.75345e-06	2.62758e-06	2.72977e-06	2.71587e-06	2.63313e-06	2.63249e-06	4.67168e-06		4.99273e-06	4.11311e-06	4.18765e-06	4.16025e-06	4.12779e-06	4.29902e-06	4.18144e-06	4.197e-06	3.34731e-06	4.0758e-06	4.18869e-06	4.21423e-06	4.04784e-06	4.15068e-06	4.04533e-06	9.75989e-06
51.7578	3.06155e-05	2.87105e-06	2.85699e-06	2.92609e-06	2.86068e-06	2.91251e-06	2.90303e-06	2.94375e-06	2.98312e-06	4.53802e-06	4.52113e-06	2.55134e-06	2.63943e-06	2.64115e-06	2.55826e-06	2.55801e-06	4.39979e-06		4.86924e-06	4.09064e-06	4.17127e-06	4.14484e-06	4.11094e-06	4.25654e-06	4.15714e-06	4.15618e-06	3.29862e-06	4.0554e-06	4.15555e-06	4.18541e-06	4.02269e-06	4.12226e-06	4.02835e-06	8.95023e-06
52.2461	2.92941e-05	2.80525e-06	2.79155e-06	2.85501e-06	2.79705e-06	2.84306e-06	2.83402e-06	2.8771e-06	2.90895e-06	4.34521e-06	4.35563e-06	2.49479e-06	2.57658e-06	2.58092e-06	2.49533e-06	2.50179e-06	4.23447e-06		4.81366e-06	4.06566e-06	4.14241e-06	4.11645e-06	4.08391e-06	4.22521e-06	4.13137e-06	4.1184e-06	3.27448e-06	4.03153e-06	4.12243e-06	4.14748e-06	3.99227e-06	4.08757e-06	3.99575e-06	8.63763e-06
52.7344	2.8923e-05	2.75139e-06	2.73316e-06	2.79205e-06	2.74028e-06	2.77973e-06	2.77501e-06	2.81925e-06	2.8436e-06	4.32733e-06	4.25358e-06	2.45628e-06	2.52607e-06	2.53123e-06	2.45331e-06	2.45437e-06	4.11872e-06		4.79191e-06	4.06828e-06	4.14483e-06	4.12191e-06	4.0956e-06	4.23432e-06	4.13881e-06	4.11497e-06	3.24956e-06	4.01676e-06	4.10805e-06	4.13983e-06	3.98664e-06	4.08012e-06	3.98536e-06	8.47424e-06
53.2227	2.94437e-05	2.68207e-06	2.66966e-06	2.72299e-06	2.67592e-06	2.71212e-06	2.70988e-06	2.75563e-06	2.7799e-06	4.29815e-06	4.21982e-06	2.40086e-06	2.46208e-06	2.47247e-06	2.40241e-06	2.40004e-06	4.08821e-06		4.75768e-06	4.03784e-06	4.11554e-06	4.09099e-06	4.06951e-06	4.20007e-06	4.11012e-06	4.08733e-06	3.21673e-06	3.97945e-06	4.07575e-06	4.10499e-06	3.95008e-06	4.04807e-06	3.94762e-06	8.23524e-06
53.7109	2.96944e-05	2.61372e-06	2.60483e-06	2.65616e-06	2.6111e-06	2.64549e-06	2.64259e-06	2.68576e-06	2.71208e-06	4.2538e-06	4.21785e-06	2.33688e-06	2.39915e-06	2.40716e-06	2.33947e-06	2.33465e-06	4.03725e-06		4.70497e-06	3.98513e-06	4.06391e-06	4.03952e-06	4.01843e-06	4.1461e-06	4.06072e-06	4.03655e-06	3.16371e-06	3.9278e-06	4.02191e-06	4.04856e-06	3.89276e-06	3.99016e-06	3.88949e-06	8.09163e-06
54.1992	3.00485e-05	2.57329e-06	2.56552e-06	2.6164e-06	2.56869e-06	2.60716e-06	2.60194e-06	2.63838e-06	2.66886e-06	4.24897e-06	4.17928e-06	2.29773e-06	2.35728e-06	2.3678e-06	2.30426e-06	2.29184e-06	4.04648e-06		4.67917e-06	3.96135e-06	4.04342e-06	4.01017e-06	3.99264e-06	4.11819e-06	4.03663e-06	4.00805e-06	3.10441e-06	3.89576e-06	3.99821e-06	4.0192e-06	3.86443e-06	3.96541e-06	3.86155e-06	7.95909e-06
54.6875	2.96879e-05	2.53852e-06	2.52681e-06	2.58215e-06	2.52922e-06	2.56845e-06	2.55972e-06	2.59817e-06	2.63224e-06	4.24368e-06	4.11976e-06	2.26735e-06	2.32366e-06	2.3387e-06	2.26857e-06	2.25967e-06	4.01946e-06		4.62876e-06	3.91587e-06	3.99803e-06	3.96882e-06	3.94655e-06	4.06879e-06	3.98378e-06	3.96477e-06	3.03806e-06	3.85266e-06	3.95075e-06	3.97938e-06	3.81773e-06	3.9229e-06	3.82019e-06	7.80828e-06
55.1758	2.91201e-05	2.47598e-06	2.46575e-06	2.52227e-06	2.46719e-06	2.51432e-06	2.49794e-06	2.53278e-06	2.56342e-06	4.16092e-06	4.06209e-06	2.20762e-06	2.26497e-06	2.2814e-06	2.20604e-06	2.2007e-06	3.96673e-06		4.57289e-06	3.87259e-06	3.9574e-06	3.9301e-06	3.90679e-06	4.01597e-06	3.93748e-06	3.92237e-06	2.99644e-06	3.81407e-06	3.91175e-06	3.93717e-06	3.77338e-06	3.87987e-06	3.78436e-06	7.57108e-06
55.6641	2.7929e-05	2.43154e-06	2.42094e-06	2.47816e-06	2.41906e-06	2.47064e-06	2.45269e-06	2.48549e-06	2.51966e-06	4.16015e-06	3.94155e-06	2.16485e-06	2.22218e-06	2.23836e-06	2.16472e-06	2.16423e-06	3.91566e-06		4.54237e-06	3.86014e-06	3.9451e-06	3.92398e-06	3.89823e-06	4.00315e-06	3.92631e-06	3.90693e-06	2.96885e-06	3.78437e-06	3.88446e-06	3.93095e-06	3.75662e-06	3.85898e-06	3.76589e-06	7.43255e-06
56.1523	2.70095e-05	2.38516e-06	2.37842e-06	2.43991e-06	2.37473e-06	2.426e-06	2.41136e-06	2.43953e-06	2.47916e-06	4.06102e-06	3.8917e-06	2.12844e-06	2.17895e-06	2.19115e-06	2.12681e-06	2.12795e-06	3.84015e-06		4.5092e-06	3.84495e-06	3.92745e-06	3.91277e-06	3.88687e-06	3.99203e-06	3.91335e-06	3.88799e-06	2.95542e-06	3.75733e-06	3.85744e-06	3.90795e-06	3.74341e-06	3.8434e-06	3.74506e-06	7.22617e-06
56.6406	2.60386e-05	2.33676e-06	2.33185e-06	2.39087e-06	2.32998e-06	2.38266e-06	2.36686e-06	2.3968e-06	2.43435e-06	3.95909e-06	3.82326e-06	2.08434e-06	2.13792e-06	2.14812e-06	2.08369e-06	2.08411e-06	3.75269e-06		4.46273e-06	3.81373e-06	3.8995e-06	3.88696e-06	3.85901e-06	3.96074e-06	3.89202e-06	3.86097e-06	2.93042e-06	3.72807e-06	3.83208e-06	3.8802e-06	3.72498e-06	3.81127e-06	3.71772e-06	6.96282e-06
57.1289	2.54418e-05	2.30729e-06	2.30805e-06	2.36221e-06	2.30817e-06	2.35779e-06	2.33963e-06	2.37107e-06	2.40458e-06	3.86618e-06	3.71244e-06	2.05792e-06	2.11156e-06	2.12166e-06	2.05673e-06	2.05741e-06	3.6903e-06		4.41974e-06	3.77408e-06	3.86065e-06	3.84938e-06	3.82153e-06	3.92445e-06	3.85753e-06	3.82384e-06	2.88836e-06	3.68888e-06	3.80089e-06	3.83701e-06	3.6889e-06	3.77729e-06	3.67742e-06	6.7081e-06
57.6172	2.5062e-05	2.28691e-06	2.2837e-06	2.33511e-06	2.28567e-06	2.33501e-06	2.31647e-06	2.34898e-06	2.37688e-06	3.81174e-06	3.66079e-06	2.0439e-06	2.09484e-06	2.1039e-06	2.04076e-06	2.04067e-06	3.66026e-06		4.38066e-06	3.74988e-06	3.83116e-06	3.81392e-06	3.79334e-06	3.88639e-06	3.82955e-06	3.79242e-06	2.85263e-06	3.66755e-06	3.77684e-06	3.80629e-06	3.66733e-06	3.75689e-06	3.65332e-06	6.55101e-06
58.1055	2.49355e-05	2.25917e-06	2.25381e-06	2.30372e-06	2.25763e-06	2.30161e-06	2.28272e-06	2.32055e-06	2.34524e-06	3.78372e-06	3.65287e-06	2.01808e-06	2.07412e-06	2.08362e-06	2.01265e-06	2.01611e-06	3.63277e-06		4.33803e-06	3.72315e-06	3.80176e-06	3.78305e-06	3.76613e-06	3.86121e-06	3.80131e-06	3.76782e-06	2.80068e-06	3.64044e-06	3.75489e-06	3.77277e-06	3.63693e-06	3.73066e-06	3.63611e-06	6.5093e-06
58.5938	2.52926e-05	2.21249e-06	2.20287e-06	2.24885e-06	2.20623e-06	2.24683e-06	2.23059e-06	2.26886e-06	2.29136e-06	3.7481e-06	3.6115e-06	1.9855e-06	2.03423e-06	2.04546e-06	1.98032e-06	1.98383e-06	3.54593e-06		4.26764e-06	3.66704e-06	3.73874e-06	3.71935e-06	3.69775e-06	3.79681e-06	3.73069e-06	3.70623e-06	2.75624e-06	3.58779e-06	3.71066e-06	3.71052e-06	3.57434e-06	3.68105e-06	3.58611e-06	6.41626e-06
59.082	2.51865e-05	2.18145e-06	2.17324e-06	2.21924e-06	2.1772e-06	2.21478e-06	2.20135e-06	2.23819e-06	2.26336e-06	3.72181e-06	3.61859e-06	1.95709e-06	2.00813e-06	2.01869e-06	1.95733e-06	1.95562e-06	3.48661e-06		4.22143e-06	3.63052e-06	3.70204e-06	3.6806e-06	3.66356e-06	3.75683e-06	3.68986e-06	3.67057e-06	2.72396e-06	3.54898e-06	3.66411e-06	3.66998e-06	3.5306e-06	3.63847e-06	3.55169e-06	6.35505e-06
59.5703	2.58772e-05	2.14492e-06	2.13136e-06	2.17889e-06	2.13327e-06	2.16925e-06	2.16257e-06	2.19566e-06	2.22269e-06	3.7186e-06	3.58652e-06	1.91673e-06	1.96986e-06	1.98304e-06	1.91834e-06	1.91636e-06	3.47137e-06		4.18201e-06	3.60302e-06	3.66903e-06	3.64905e-06	3.63181e-06	3.72405e-06	3.65678e-06	3.63996e-06	2.67222e-06	3.51892e-06	3.6319e-06	3.6343e-06	3.50159e-06	3.60446e-06	3.5257e-06	6.31186e-06
60.0586	2.53754e-05	2.10565e-06	2.09367e-06	2.14055e-06	2.09516e-06	2.13053e-06	2.12808e-06	2.15773e-06	2.18942e-06	3.60637e-06	3.44081e-06	1.87231e-06	1.92829e-06	1.94261e-06	1.87995e-06	1.87519e-06	3.34239e-06		4.12391e-06	3.55616e-06	3.62078e-06	3.59952e-06	3.58273e-06	3.67609e-06	3.61124e-06	3.5964e-06	2.62468e-06	3.48081e-06	3.58612e-06	3.59559e-06	3.46088e-06	3.56027e-06	3.48019e-06	6.13557e-06
60.5469	2.42955e-05	2.06664e-06	2.05335e-06	2.10441e-06	2.05699e-06	2.09501e-06	2.09088e-06	2.12011e-06	2.15817e-06	3.50482e-06	3.3251e-06	1.82597e-06	1.88829e-06	1.9041e-06	1.83654e-06	1.83077e-06	3.30402e-06		4.06864e-06	3.50285e-06	3.56954e-06	3.55016e-06	3.53457e-06	3.62484e-06	3.55719e-06	3.54244e-06	2.58167e-06	3.42633e-06	3.52091e-06	3.5499e-06	3.4064e-06	3.49949e-06	3.42113e-06	5.99201e-06
61.0352	2.29173e-05	2.01864e-06	2.01119e-06	2.06221e-06	2.01611e-06	2.05685e-06	2.05044e-06	2.07485e-06	2.12082e-06	3.39671e-06	3.17809e-06	1.77783e-06	1.84388e-06	1.85882e-06	1.79389e-06	1.78742e-06	3.19517e-06		4.01e-06	3.44879e-06	3.51353e-06	3.49975e-06	3.48088e-06	3.5757e-06	3.49895e-06	3.47919e-06	2.53359e-06	3.37484e-06	3.47546e-06	3.49763e-06	3.35892e-06	3.4572e-06	3.37456e-06	5.82857e-06
61.5234	2.16052e-05	1.95914e-06	1.95502e-06	2.00213e-06	1.95869e-06	2.00255e-06	1.9929e-06	2.01674e-06	2.07217e-06	3.26948e-06	3.07653e-06	1.7259e-06	1.79196e-06	1.8035e-06	1.75768e-06	1.74279e-06	3.07211e-06		3.92271e-06	3.37275e-06	3.43718e-06	3.43158e-06	3.40961e-06	3.50623e-06	3.42534e-06	3.41174e-06	2.47565e-06	3.298e-06	3.40163e-06	3.42037e-06	3.28788e-06	3.38735e-06	3.30612e-06	5.78723e-06
62.0117	2.06244e-05	1.91037e-06	1.91218e-06	1.95716e-06	1.91634e-06	1.96229e-06	1.94803e-06	1.97132e-06	2.02869e-06	3.20494e-06	3.01879e-06	1.68071e-06	1.75103e-06	1.757e-06	1.71002e-06	1.6995e-06	3.01644e-06		3.85805e-06	3.31525e-06	3.37585e-06	3.37671e-06	3.35093e-06	3.4399e-06	3.36741e-06	3.35627e-06	2.42871e-06	3.23346e-06	3.3343e-06	3.3602e-06	3.22802e-06	3.32435e-06	3.24439e-06	5.63015e-06
62.5	2.00357e-05	1.87994e-06	1.88554e-06	1.92395e-06	1.88806e-06	1.93297e-06	1.91958e-06	1.94522e-06	2.00196e-06	3.1559e-06	2.97958e-06	1.65654e-06	1.72367e-06	1.73086e-06	1.68444e-06	1.67556e-06	2.93421e-06		3.80114e-06	3.27416e-06	3.33918e-06	3.34083e-06	3.31897e-06	3.39621e-06	3.32955e-06	3.31215e-06	2.38611e-06	3.19119e-06	3.299e-06	3.3145e-06	3.18802e-06	3.28773e-06	3.20621e-06	5.5514e-06
62.9883	1.91904e-05	1.84663e-06	1.85306e-06	1.88998e-06	1.85483e-06	1.89845e-06	1.88349e-06	1.91152e-06	1.95096e-06	3.04022e-06	2.96274e-06	1.62528e-06	1.6911e-06	1.70112e-06	1.66054e-06	1.64894e-06	2.88663e-06		3.78146e-06	3.26466e-06	3.33128e-06	3.33701e-06	3.31575e-06	3.38667e-06	3.31802e-06	3.3001e-06	2.34093e-06	3.16719e-06	3.27276e-06	3.28498e-06	3.16827e-06	3.26167e-06	3.18509e-06	5.44466e-06
63.4766	1.92726e-05	1.80135e-06	1.81098e-06	1.84819e-06	1.81247e-06	1.85482e-06	1.83929e-06	1.86851e-06	1.89711e-06	2.92943e-06	2.93827e-06	1.58173e-06	1.64754e-06	1.66253e-06	1.60505e-06	1.60274e-06	2.84528e-06		3.72845e-06	3.22161e-06	3.28814e-06	3.29215e-06	3.27294e-06	3.3393e-06	3.27332e-06	3.24979e-06	2.31723e-06	3.11674e-06	3.21767e-06	3.23005e-06	3.12073e-06	3.21193e-06	3.13548e-06	5.2764e-06
63.9648	1.93075e-05	1.75249e-06	1.7615e-06	1.79922e-06	1.76339e-06	1.80239e-06	1.78696e-06	1.81792e-06	1.84458e-06	2.85195e-06	2.88158e-06	1.53573e-06	1.6013e-06	1.61671e-06	1.55229e-06	1.55265e-06	2.76488e-06		3.65681e-06	3.15997e-06	3.22834e-06	3.22559e-06	3.20861e-06	3.27979e-06	3.21086e-06	3.18649e-06	2.27465e-06	3.06778e-06	3.16405e-06	3.16836e-06	3.06726e-06	3.15758e-06	3.08385e-06	5.14433e-06
64.4531	1.92717e-05	1.70642e-06	1.70822e-06	1.74771e-06	1.71104e-06	1.74749e-06	1.73197e-06	1.76598e-06	1.78937e-06	2.82606e-06	2.8528e-06	1.49385e-06	1.5561e-06	1.57202e-06	1.51316e-06	1.51126e-06	2.71524e-06		3.56175e-06	3.08558e-06	3.15873e-06	3.15388e-06	3.1382e-06	3.2124e-06	3.13394e-06	3.10903e-06	2.21898e-06	2.99387e-06	3.09182e-06	3.09092e-06	2.9932e-06	3.08472e-06	3.01618e-06	5.0287e-06
64.9414	1.91732e-05	1.63919e-06	1.64109e-06	1.67996e-06	1.64198e-06	1.68033e-06	1.66694e-06	1.6975e-06	1.73008e-06	2.84209e-06	2.7867e-06	1.44159e-06	1.49413e-06	1.50896e-06	1.45326e-06	1.4522e-06	2.6571e-06		3.45935e-06	2.99407e-06	3.07057e-06	3.06099e-06	3.0466e-06	3.11927e-06	3.0474e-06	3.0236e-06	2.16958e-06	2.91269e-06	3.00849e-06	3.00432e-06	2.90685e-06	2.99947e-06	2.93243e-06	4.9765e-06
65.4297	1.83761e-05	1.58444e-06	1.58189e-06	1.62058e-06	1.58208e-06	1.6243e-06	1.61149e-06	1.64035e-06	1.67646e-06	2.84584e-06	2.73363e-06	1.39543e-06	1.44487e-06	1.45525e-06	1.4033e-06	1.40273e-06	2.58699e-06		3.34676e-06	2.88962e-06	2.96378e-06	2.95564e-06	2.93673e-06	3.00624e-06	2.94103e-06	2.91915e-06	2.09888e-06	2.81297e-06	2.9078e-06	2.90512e-06	2.80035e-06	2.90343e-06	2.83538e-06	4.88815e-06
65.918	1.76188e-05	1.54223e-06	1.53847e-06	1.57437e-06	1.53661e-06	1.58178e-06	1.56894e-06	1.59354e-06	1.62537e-06	2.7796e-06	2.64318e-06	1.3594e-06	1.40382e-06	1.41386e-06	1.36266e-06	1.36176e-06	2.52963e-06		3.28825e-06	2.82791e-06	2.9011e-06	2.89682e-06	2.87811e-06	2.94621e-06	2.88118e-06	2.85976e-06	2.04772e-06	2.75863e-06	2.8535e-06	2.84544e-06	2.74349e-06	2.84285e-06	2.77622e-06	4.74097e-06
66.4062	1.69143e-05	1.5007e-06	1.49778e-06	1.53074e-06	1.49403e-06	1.54212e-06	1.53149e-06	1.54824e-06	1.57571e-06	2.74078e-06	2.54333e-06	1.32411e-06	1.36525e-06	1.3768e-06	1.32126e-06	1.32545e-06	2.45716e-06		3.18681e-06	2.73556e-06	2.80302e-06	2.80259e-06	2.78134e-06	2.85013e-06	2.79192e-06	2.77318e-06	1.99152e-06	2.67543e-06	2.76323e-06	2.75977e-06	2.65607e-06	2.75669e-06	2.69059e-06	4.59701e-06
66.8945	1.68906e-05	1.45904e-06	1.45589e-06	1.48712e-06	1.45296e-06	1.49931e-06	1.48974e-06	1.50668e-06	1.53071e-06	2.65355e-06	2.489e-06	1.28779e-06	1.32944e-06	1.33913e-06	1.2813e-06	1.28672e-06	2.39028e-06		3.10682e-06	2.65278e-06	2.71491e-06	2.72085e-06	2.69678e-06	2.76793e-06	2.70927e-06	2.68676e-06	1.94885e-06	2.5941e-06	2.67848e-06	2.6792e-06	2.57765e-06	2.67104e-06	2.60844e-06	4.45708e-06
67.3828	1.70105e-05	1.42747e-06	1.42766e-06	1.45779e-06	1.42475e-06	1.46637e-06	1.45959e-06	1.47704e-06	1.49644e-06	2.64251e-06	2.46342e-06	1.25842e-06	1.30332e-06	1.31016e-06	1.25068e-06	1.25517e-06	2.40064e-06		3.03669e-06	2.59002e-06	2.65569e-06	2.66019e-06	2.63997e-06	2.70313e-06	2.64821e-06	2.62215e-06	1.90784e-06	2.54035e-06	2.62934e-06	2.62616e-06	2.52501e-06	2.61804e-06	2.55531e-06	4.36672e-06
67.8711	1.67594e-05	1.39384e-06	1.39488e-06	1.42693e-06	1.39346e-06	1.43433e-06	1.42763e-06	1.44621e-06	1.46602e-06	2.62016e-06	2.39908e-06	1.23142e-06	1.27581e-06	1.28109e-06	1.22272e-06	1.22633e-06	2.3858e-06		2.97316e-06	2.53692e-06	2.60047e-06	2.60055e-06	2.58374e-06	2.64634e-06	2.59499e-06	2.56162e-06	1.87052e-06	2.48495e-06	2.56871e-06	2.57465e-06	2.47139e-06	2.56137e-06	2.5005e-06	4.34663e-06
68.3594	1.68482e-05	1.34492e-06	1.34424e-06	1.37713e-06	1.34574e-06	1.38203e-06	1.37268e-06	1.39356e-06	1.41711e-06	2.5813e-06	2.37423e-06	1.18819e-06	1.23592e-06	1.23905e-06	1.18519e-06	1.18458e-06	2.37168e-06		2.91207e-06	2.48314e-06	2.54891e-06	2.54599e-06	2.52842e-06	2.59296e-06	2.5395e-06	2.5044e-06	1.83228e-06	2.42817e-06	2.51318e-06	2.51931e-06	2.41688e-06	2.50086e-06	2.44426e-06	4.26678e-06
68.8477	1.6375e-05	1.31045e-06	1.31271e-06	1.3456e-06	1.31614e-06	1.35003e-06	1.33915e-06	1.35885e-06	1.37594e-06	2.51814e-06	2.36038e-06	1.15509e-06	1.20682e-06	1.20918e-06	1.15539e-06	1.15439e-06	2.36524e-06		2.87432e-06	2.44285e-06	2.50879e-06	2.50088e-06	2.48701e-06	2.54762e-06	2.49923e-06	2.46907e-06	1.80827e-06	2.39158e-06	2.47441e-06	2.48582e-06	2.38175e-06	2.4605e-06	2.40361e-06	4.15209e-06
69.3359	1.57967e-05	1.2808e-06	1.28293e-06	1.31591e-06	1.28661e-06	1.32008e-06	1.3085e-06	1.32538e-06	1.33951e-06	2.41896e-06	2.30551e-06	1.12797e-06	1.17936e-06	1.18349e-06	1.12621e-06	1.12819e-06	2.29959e-06		2.78784e-06	2.37312e-06	2.43321e-06	2.42341e-06	2.40944e-06	2.4753e-06	2.42407e-06	2.40089e-06	1.76516e-06	2.32558e-06	2.40688e-06	2.41541e-06	2.31437e-06	2.39102e-06	2.33503e-06	4.02809e-06
69.8242	1.53934e-05	1.24993e-06	1.25418e-06	1.28781e-06	1.25819e-06	1.29082e-06	1.28113e-06	1.29472e-06	1.30531e-06	2.35963e-06	2.29897e-06	1.09369e-06	1.14983e-06	1.15213e-06	1.09198e-06	1.09565e-06	2.27736e-06		2.72451e-06	2.31287e-06	2.37029e-06	2.35731e-06	2.34123e-06	2.40326e-06	2.35704e-06	2.33971e-06	1.7273e-06	2.26853e-06	2.34876e-06	2.35304e-06	2.25601e-06	2.33338e-06	2.27665e-06	3.9474e-06
70.3125	1.48737e-05	1.22866e-06	1.23586e-06	1.26913e-06	1.23936e-06	1.27318e-06	1.26444e-06	1.2767e-06	1.286e-06	2.28397e-06	2.24716e-06	1.07294e-06	1.12798e-06	1.13331e-06	1.06889e-06	1.07578e-06	2.20741e-06		2.65353e-06	2.25451e-06	2.30965e-06	2.29411e-06	2.27896e-06	2.34722e-06	2.29485e-06	2.28504e-06	1.6956e-06	2.21094e-06	2.29084e-06	2.29808e-06	2.20232e-06	2.27921e-06	2.22079e-06	3.87643e-06
70.8008	1.4147e-05	1.20583e-06	1.21226e-06	1.24676e-06	1.21531e-06	1.24973e-06	1.24285e-06	1.25531e-06	1.26392e-06	2.21057e-06	2.18752e-06	1.0528e-06	1.10544e-06	1.11091e-06	1.04633e-06	1.05596e-06	2.13372e-06		2.56482e-06	2.1907e-06	2.2426e-06	2.22849e-06	2.21248e-06	2.28531e-06	2.22457e-06	2.21479e-06	1.64293e-06	2.14354e-06	2.22592e-06	2.22615e-06	2.13358e-06	2.21965e-06	2.1544e-06	3.77489e-06
71.2891	1.32326e-05	1.18639e-06	1.19453e-06	1.22628e-06	1.19657e-06	1.23424e-06	1.22589e-06	1.23738e-06	1.2428e-06	2.17215e-06	2.09823e-06	1.02925e-06	1.08352e-06	1.09063e-06	1.02432e-06	1.03332e-06	2.06381e-06		2.52678e-06	2.15764e-06	2.2098e-06	2.19431e-06	2.18125e-06	2.25298e-06	2.19175e-06	2.17947e-06	1.60515e-06	2.10889e-06	2.1888e-06	2.1929e-06	2.10409e-06	2.18467e-06	2.11962e-06	3.69567e-06
71.7773	1.30175e-05	1.16119e-06	1.1696e-06	1.19889e-06	1.17024e-06	1.20934e-06	1.19884e-06	1.2116e-06	1.21774e-06	2.1247e-06	2.03411e-06	1.00787e-06	1.05821e-06	1.06853e-06	1.00509e-06	1.01143e-06	1.99791e-06		2.48069e-06	2.11936e-06	2.16974e-06	2.15866e-06	2.14584e-06	2.21887e-06	2.15503e-06	2.14348e-06	1.58284e-06	2.07359e-06	2.14911e-06	2.15577e-06	2.06486e-06	2.1415e-06	2.08282e-06	3.62162e-06
72.2656	1.23919e-05	1.13624e-06	1.14493e-06	1.17178e-06	1.14434e-06	1.18241e-06	1.17161e-06	1.18487e-06	1.1931e-06	2.06335e-06	2.02136e-06	9.854e-07	1.03191e-06	1.04595e-06	9.8408e-07	9.8955e-07	1.94226e-06		2.42325e-06	2.07109e-06	2.12187e-06	2.11561e-06	2.10152e-06	2.16524e-06	2.1069e-06	2.09363e-06	1.53826e-06	2.03128e-06	2.10416e-06	2.10634e-06	2.01777e-06	2.09607e-06	2.04026e-06	3.58923e-06
72.7539	1.22454e-05	1.11009e-06	1.11993e-06	1.14509e-06	1.11816e-06	1.15592e-06	1.14615e-06	1.15838e-06	1.16434e-06	2.02189e-06	1.99429e-06	9.5874e-07	1.00651e-06	1.01732e-06	9.5715e-07	9.6196e-07	1.912e-06		2.37013e-06	2.02258e-06	2.07035e-06	2.06443e-06	2.05131e-06	2.10873e-06	2.06003e-06	2.04115e-06	1.49789e-06	1.98639e-06	2.05156e-06	2.05353e-06	1.9725e-06	2.0427e-06	1.99507e-06	3.53187e-06
73.2422	1.189e-05	1.0856e-06	1.09471e-06	1.11838e-06	1.09379e-06	1.12955e-06	1.11882e-06	1.13206e-06	1.13849e-06	1.95865e-06	1.93808e-06	9.3419e-07	9.8438e-07	9.9206e-07	9.3279e-07	9.3939e-07	1.85819e-06		2.30275e-06	1.9541e-06	2.00215e-06	1.99785e-06	1.9852e-06	2.03989e-06	1.99123e-06	1.97798e-06	1.45888e-06	1.91971e-06	1.97893e-06	1.98441e-06	1.90542e-06	1.96941e-06	1.92729e-06	3.48867e-06
73.7305	1.15616e-05	1.06049e-06	1.06788e-06	1.09089e-06	1.06767e-06	1.10109e-06	1.09068e-06	1.10451e-06	1.11216e-06	1.90156e-06	1.91011e-06	9.1058e-07	9.632e-07	9.6726e-07	9.0712e-07	9.1537e-07	1.81297e-06		2.23644e-06	1.89174e-06	1.938e-06	1.93162e-06	1.91913e-06	1.97228e-06	1.92444e-06	1.90962e-06	1.40903e-06	1.84977e-06	1.91122e-06	1.91116e-06	1.8356e-06	1.90491e-06	1.86246e-06	3.42403e-06
74.2188	1.16574e-05	1.03937e-06	1.04482e-06	1.06815e-06	1.04563e-06	1.07725e-06	1.06751e-06	1.08185e-06	1.09388e-06	1.85412e-06	1.82986e-06	8.8973e-07	9.4608e-07	9.4599e-07	8.8684e-07	8.9596e-07	1.76423e-06		2.17302e-06	1.83548e-06	1.87816e-06	1.87584e-06	1.85926e-06	1.91354e-06	1.86141e-06	1.84536e-06	1.36722e-06	1.78686e-06	1.84966e-06	1.84634e-06	1.77594e-06	1.84128e-06	1.79827e-06	3.31396e-06
74.707	1.12896e-05	1.0177e-06	1.02598e-06	1.0492e-06	1.02691e-06	1.0594e-06	1.0485e-06	1.0621e-06	1.07184e-06	1.79543e-06	1.7409e-06	8.7328e-07	9.2725e-07	9.2822e-07	8.7233e-07	8.7993e-07	1.71754e-06		2.11352e-06	1.7912e-06	1.83364e-06	1.82972e-06	1.81605e-06	1.86822e-06	1.81801e-06	1.80251e-06	1.33756e-06	1.74045e-06	1.80335e-06	1.79654e-06	1.73117e-06	1.79444e-06	1.7502e-06	3.19504e-06
75.1953	1.08847e-05	9.8938e-07	9.9876e-07	1.02525e-06	1.00029e-06	1.03403e-06	1.02284e-06	1.0352e-06	1.04686e-06	1.75363e-06	1.69069e-06	8.5348e-07	9.0269e-07	9.0694e-07	8.4934e-07	8.5815e-07	1.67919e-06		2.05681e-06	1.74278e-06	1.78375e-06	1.78094e-06	1.76471e-06	1.81501e-06	1.76656e-06	1.75262e-06	1.30224e-06	1.69286e-06	1.75498e-06	1.74779e-06	1.68223e-06	1.74889e-06	1.70386e-06	3.0712e-06
75.6836	1.09151e-05	9.6826e-07	9.777e-07	1.00511e-06	9.8009e-07	1.01289e-06	9.9976e-07	1.01261e-06	1.02348e-06	1.73375e-06	1.67539e-06	8.3738e-07	8.8592e-07	8.8883e-07	8.3332e-07	8.4152e-07	1.65172e-06		1.99878e-06	1.69581e-06	1.73797e-06	1.7355e-06	1.71761e-06	1.76807e-06	1.71913e-06	1.70592e-06	1.26515e-06	1.65165e-06	1.70749e-06	1.70497e-06	1.63798e-06	1.69868e-06	1.65601e-06	3.00061e-06
76.1719	1.06476e-05	9.3911e-07	9.4979e-07	9.7659e-07	9.5305e-07	9.8458e-07	9.7162e-07	9.862e-07	9.9704e-07	1.71387e-06	1.65402e-06	8.1471e-07	8.6171e-07	8.6574e-07	8.1115e-07	8.1839e-07	1.62138e-06		1.93211e-06	1.64758e-06	1.68813e-06	1.68511e-06	1.66994e-06	1.72033e-06	1.66841e-06	1.65219e-06	1.22185e-06	1.59895e-06	1.64825e-06	1.64966e-06	1.58475e-06	1.63838e-06	1.59701e-06	2.93776e-06
76.6602	1.02234e-05	9.0741e-07	9.2015e-07	9.4639e-07	9.2405e-07	9.5411e-07	9.4101e-07	9.5497e-07	9.6633e-07	1.70674e-06	1.65253e-06	7.8892e-07	8.3484e-07	8.3807e-07	7.8457e-07	7.9079e-07	1.62511e-06		1.86822e-06	1.58853e-06	1.63011e-06	1.62626e-06	1.60906e-06	1.6563e-06	1.60697e-06	1.59239e-06	1.17567e-06	1.54076e-06	1.58375e-06	1.59262e-06	1.5261e-06	1.57135e-06	1.53523e-06	2.89246e-06
77.1484	1.00084e-05	8.8103e-07	8.9373e-07	9.1773e-07	8.9757e-07	9.2715e-07	9.1479e-07	9.2731e-07	9.3881e-07	1.68792e-06	1.64927e-06	7.6185e-07	8.1011e-07	8.1228e-07	7.578e-07	7.6469e-07	1.61085e-06		1.81715e-06	1.53986e-06	1.58018e-06	1.57686e-06	1.55767e-06	1.60699e-06	1.5575e-06	1.54351e-06	1.13506e-06	1.49256e-06	1.53664e-06	1.54136e-06	1.47654e-06	1.52229e-06	1.48743e-06	2.84849e-06
77.6367	9.54207e-06	8.5287e-07	8.6498e-07	8.8646e-07	8.6847e-07	8.9706e-07	8.8454e-07	8.9693e-07	9.0799e-07	1.65088e-06	1.62129e-06	7.3531e-07	7.8268e-07	7.8668e-07	7.3185e-07	7.3689e-07	1.58338e-06		1.76191e-06	1.48812e-06	1.52418e-06	1.52046e-06	1.50519e-06	1.55193e-06	1.50544e-06	1.4908e-06	1.09536e-06	1.44065e-06	1.48644e-06	1.48903e-06	1.42761e-06	1.47373e-06	1.4377e-06	2.75373e-06
78.125	9.13551e-06	8.3031e-07	8.4018e-07	8.6038e-07	8.4273e-07	8.7071e-07	8.5814e-07	8.7065e-07	8.8056e-07	1.62676e-06	1.59882e-06	7.1371e-07	7.6052e-07	7.6365e-07	7.084e-07	7.1509e-07	1.56242e-06		1.70861e-06	1.42995e-06	1.46534e-06	1.46031e-06	1.44399e-06	1.49135e-06	1.44977e-06	1.43399e-06	1.05352e-06	1.38812e-06	1.43269e-06	1.43567e-06	1.37275e-06	1.42234e-06	1.38842e-06	2.63981e-06
78.6133	8.76975e-06	8.0513e-07	8.1374e-07	8.3377e-07	8.1507e-07	8.4527e-07	8.3241e-07	8.4086e-07	8.4893e-07	1.56742e-06	1.55137e-06	6.8807e-07	7.3476e-07	7.3819e-07	6.8373e-07	6.9167e-07	1.52616e-06		1.65879e-06	1.38103e-06	1.41495e-06	1.41173e-06	1.3944e-06	1.44491e-06	1.40479e-06	1.38545e-06	1.02415e-06	1.34244e-06	1.3917e-06	1.39139e-06	1.32854e-06	1.38313e-06	1.34793e-06	2.54022e-06
79.1016	8.76763e-06	7.8259e-07	7.9022e-07	8.0926e-07	7.908e-07	8.2163e-07	8.0816e-07	8.1755e-07	8.2484e-07	1.53011e-06	1.51645e-06	6.6674e-07	7.1157e-07	7.1606e-07	6.6468e-07	6.7143e-07	1.47968e-06		1.61246e-06	1.34358e-06	1.37881e-06	1.37423e-06	1.35847e-06	1.40471e-06	1.36736e-06	1.3431e-06	9.937e-07	1.30257e-06	1.35521e-06	1.35306e-06	1.28895e-06	1.34851e-06	1.30948e-06	2.44215e-06
79.5898	8.64626e-06	7.5702e-07	7.6319e-07	7.8231e-07	7.643e-07	7.9323e-07	7.8003e-07	7.9013e-07	8.0097e-07	1.50025e-06	1.48166e-06	6.4629e-07	6.8787e-07	6.9125e-07	6.4501e-07	6.522e-07	1.4362e-06		1.56515e-06	1.29686e-06	1.33339e-06	1.3283e-06	1.31296e-06	1.35712e-06	1.3237e-06	1.29686e-06	9.6542e-07	1.26224e-06	1.31066e-06	1.30843e-06	1.24569e-06	1.30694e-06	1.26852e-06	2.38366e-06
80.0781	8.62011e-06	7.3554e-07	7.4136e-07	7.6116e-07	7.4238e-07	7.719e-07	7.5932e-07	7.6889e-07	7.7939e-07	1.46117e-06	1.43788e-06	6.2582e-07	6.6808e-07	6.7169e-07	6.2406e-07	6.3306e-07	1.38188e-06		1.51816e-06	1.26245e-06	1.29837e-06	1.29321e-06	1.27875e-06	1.32098e-06	1.29005e-06	1.26217e-06	9.3924e-07	1.2277e-06	1.27625e-06	1.27391e-06	1.21284e-06	1.27246e-06	1.23147e-06	2.3218e-06
80.5664	8.5805e-06	7.1221e-07	7.1826e-07	7.3915e-07	7.1982e-07	7.4843e-07	7.3704e-07	7.4609e-07	7.562e-07	1.42637e-06	1.38297e-06	6.0717e-07	6.4791e-07	6.5095e-07	6.0515e-07	6.1409e-07	1.33676e-06		1.47179e-06	1.21771e-06	1.25272e-06	1.24707e-06	1.23506e-06	1.27541e-06	1.24231e-06	1.21865e-06	9.0416e-07	1.1846e-06	1.23028e-06	1.22791e-06	1.16856e-06	1.22767e-06	1.18489e-06	2.27513e-06
81.0547	8.11391e-06	6.9104e-07	6.9742e-07	7.1726e-07	6.997e-07	7.268e-07	7.1582e-07	7.2381e-07	7.3574e-07	1.36563e-06	1.31948e-06	5.8927e-07	6.2972e-07	6.3183e-07	5.8822e-07	5.9748e-07	1.2824e-06		1.41031e-06	1.1713e-06	1.20355e-06	1.19677e-06	1.18743e-06	1.22726e-06	1.19415e-06	1.17589e-06	8.7206e-07	1.14566e-06	1.18387e-06	1.18291e-06	1.12613e-06	1.18343e-06	1.14401e-06	2.25907e-06
81.543	7.71331e-06	6.6929e-07	6.779e-07	6.9788e-07	6.8036e-07	7.0661e-07	6.9665e-07	7.0418e-07	7.1364e-07	1.29863e-06	1.2748e-06	5.6957e-07	6.1009e-07	6.1136e-07	5.6875e-07	5.7623e-07	1.24184e-06		1.36002e-06	1.12922e-06	1.15951e-06	1.15351e-06	1.14257e-06	1.1834e-06	1.1508e-06	1.13559e-06	8.3912e-07	1.10672e-06	1.14623e-06	1.14081e-06	1.08746e-06	1.14158e-06	1.10576e-06	2.17222e-06
82.0312	7.05504e-06	6.5185e-07	6.6009e-07	6.7979e-07	6.6241e-07	6.8712e-07	6.7932e-07	6.8659e-07	6.9605e-07	1.25855e-06	1.24191e-06	5.5245e-07	5.9374e-07	5.9393e-07	5.5241e-07	5.5773e-07	1.22405e-06		1.32007e-06	1.09569e-06	1.12405e-06	1.11828e-06	1.10648e-06	1.14636e-06	1.11606e-06	1.1019e-06	8.1557e-07	1.07428e-06	1.11193e-06	1.10679e-06	1.05363e-06	1.10419e-06	1.0731e-06	2.11782e-06
82.5195	6.671e-06	6.3234e-07	6.4044e-07	6.5819e-07	6.4348e-07	6.6623e-07	6.5913e-07	6.662e-07	6.7914e-07	1.22927e-06	1.21562e-06	5.3481e-07	5.757e-07	5.763e-07	5.3494e-07	5.4024e-07	1.20977e-06		1.28293e-06	1.06438e-06	1.09064e-06	1.08781e-06	1.07214e-06	1.11119e-06	1.07941e-06	1.06584e-06	7.8859e-07	1.04509e-06	1.07953e-06	1.07022e-06	1.02218e-06	1.07127e-06	1.04308e-06	2.07153e-06
83.0078	6.71554e-06	6.1751e-07	6.2709e-07	6.4539e-07	6.2985e-07	6.5242e-07	6.4357e-07	6.5141e-07	6.6469e-07	1.19092e-06	1.17245e-06	5.2147e-07	5.6254e-07	5.6232e-07	5.205e-07	5.2616e-07	1.18495e-06		1.23626e-06	1.02519e-06	1.05243e-06	1.05212e-06	1.0354e-06	1.07103e-06	1.04158e-06	1.02417e-06	7.5908e-07	1.0086e-06	1.04535e-06	1.03489e-06	9.855e-07	1.03732e-06	1.00783e-06	1.97895e-06
83.4961	6.54761e-06	5.9845e-07	6.0837e-07	6.268e-07	6.1023e-07	6.3332e-07	6.2532e-07	6.3259e-07	6.4687e-07	1.16607e-06	1.15742e-06	5.0519e-07	5.456e-07	5.4592e-07	5.0212e-07	5.0883e-07	1.14921e-06		1.20745e-06	9.9631e-07	1.02125e-06	1.01868e-06	1.00284e-06	1.04056e-06	1.00961e-06	9.9393e-07	7.3254e-07	9.7828e-07	1.0144e-06	1.00447e-06	9.5596e-07	1.0085e-06	9.7733e-07	1.89534e-06
83.9844	6.49834e-06	5.8379e-07	5.9455e-07	6.1386e-07	5.9559e-07	6.211e-07	6.1206e-07	6.1868e-07	6.338e-07	1.12006e-06	1.12015e-06	4.9135e-07	5.3244e-07	5.3346e-07	4.8758e-07	4.9575e-07	1.10195e-06		1.17209e-06	9.6323e-07	9.8693e-07	9.8342e-07	9.7016e-07	1.00839e-06	9.7564e-07	9.6074e-07	7.0277e-07	9.4651e-07	9.8189e-07	9.7208e-07	9.2337e-07	9.7802e-07	9.4465e-07	1.84905e-06
84.4727	6.4275e-06	5.6451e-07	5.7662e-07	5.966e-07	5.7695e-07	6.0357e-07	5.9426e-07	6.0071e-07	6.1297e-07	1.0875e-06	1.10063e-06	4.7575e-07	5.1591e-07	5.176e-07	4.7425e-07	4.8146e-07	1.0744e-06		1.13052e-06	9.2981e-07	9.5291e-07	9.4864e-07	9.3742e-07	9.7687e-07	9.4293e-07	9.2817e-07	6.7677e-07	9.1198e-07	9.4961e-07	9.4175e-07	8.9045e-07	9.4506e-07	9.0921e-07	1.76921e-06
84.9609	6.20293e-06	5.5234e-07	5.6652e-07	5.8601e-07	5.671e-07	5.925e-07	5.8335e-07	5.9004e-07	6.0175e-07	1.05741e-06	1.09121e-06	4.6432e-07	5.0494e-07	5.0645e-07	4.629e-07	4.7062e-07	1.05745e-06		1.08992e-06	8.981e-07	9.2145e-07	9.1629e-07	9.071e-07	9.4556e-07	9.1138e-07	8.9878e-07	6.5421e-07	8.8349e-07	9.2152e-07	9.11e-07	8.6367e-07	9.165e-07	8.8035e-07	1.70026e-06
85.4492	5.93064e-06	5.3525e-07	5.492e-07	5.6844e-07	5.5044e-07	5.7376e-07	5.6735e-07	5.7243e-07	5.8441e-07	1.02412e-06	1.06246e-06	4.5116e-07	4.904e-07	4.9152e-07	4.5015e-07	4.5801e-07	1.04575e-06		1.04413e-06	8.6314e-07	8.8597e-07	8.8362e-07	8.739e-07	9.0925e-07	8.7584e-07	8.642e-07	6.3236e-07	8.4889e-07	8.8653e-07	8.7607e-07	8.3115e-07	8.816e-07	8.4815e-07	1.64327e-06
85.9375	5.71291e-06	5.1849e-07	5.3413e-07	5.5173e-07	5.3575e-07	5.5561e-07	5.5055e-07	5.5449e-07	5.6485e-07	1.00458e-06	1.03038e-06	4.3891e-07	4.7683e-07	4.7651e-07	4.3808e-07	4.4592e-07	1.02035e-06		1.00934e-06	8.3566e-07	8.5879e-07	8.5796e-07	8.4712e-07	8.808e-07	8.4847e-07	8.3833e-07	6.1011e-07	8.227e-07	8.5719e-07	8.4655e-07	8.0431e-07	8.543e-07	8.2187e-07	1.60772e-06
86.4258	5.37374e-06	5.0368e-07	5.1899e-07	5.354e-07	5.2138e-07	5.4077e-07	5.3362e-07	5.3869e-07	5.4513e-07	9.8113e-07	1.01191e-06	4.2674e-07	4.6287e-07	4.6283e-07	4.2451e-07	4.3373e-07	9.9354e-07		9.7885e-07	8.0977e-07	8.322e-07	8.3106e-07	8.2001e-07	8.4993e-07	8.2063e-07	8.1239e-07	5.8828e-07	7.9748e-07	8.307e-07	8.1717e-07	7.7948e-07	8.2797e-07	7.9697e-07	1.56129e-06
86.9141	5.05531e-06	4.9068e-07	5.0454e-07	5.2027e-07	5.0663e-07	5.2686e-07	5.1814e-07	5.2167e-07	5.2944e-07	9.5779e-07	9.8997e-07	4.1436e-07	4.4881e-07	4.5018e-07	4.1256e-07	4.2067e-07	9.5267e-07		9.5082e-07	7.8454e-07	8.0702e-07	8.0546e-07	7.9431e-07	8.2267e-07	7.9403e-07	7.8623e-07	5.6669e-07	7.7101e-07	8.0272e-07	7.8668e-07	7.5265e-07	8.0098e-07	7.7391e-07	1.49689e-06
87.4023	4.87515e-06	4.7815e-07	4.892e-07	5.0395e-07	4.9093e-07	5.1204e-07	5.0304e-07	5.0706e-07	5.1339e-07	9.2963e-07	9.5421e-07	4.037e-07	4.3605e-07	4.383e-07	4.0247e-07	4.095e-07	9.2244e-07		9.263e-07	7.6595e-07	7.8682e-07	7.8279e-07	7.7353e-07	8.0253e-07	7.7413e-07	7.6532e-07	5.4546e-07	7.511e-07	7.8314e-07	7.6691e-07	7.3312e-07	7.7993e-07	7.5507e-07	1.45374e-06
87.8906	4.73204e-06	4.6668e-07	4.766e-07	4.9135e-07	4.7778e-07	4.9944e-07	4.9017e-07	4.938e-07	4.9788e-07	9.1135e-07	9.1351e-07	3.9195e-07	4.2459e-07	4.2704e-07	3.9092e-07	3.9783e-07	8.9014e-07		8.9098e-07	7.403e-07	7.6183e-07	7.5638e-07	7.4659e-07	7.7468e-07	7.4688e-07	7.362e-07	5.2795e-07	7.2481e-07	7.5716e-07	7.405e-07	7.0606e-07	7.5126e-07	7.2668e-07	1.40288e-06
88.3789	4.65625e-06	4.4955e-07	4.59e-07	4.7388e-07	4.5985e-07	4.8115e-07	4.7253e-07	4.7618e-07	4.8161e-07	8.9927e-07	8.7924e-07	3.7614e-07	4.0873e-07	4.1082e-07	3.7562e-07	3.82e-07	8.6941e-07		8.5651e-07	7.1331e-07	7.3445e-07	7.2967e-07	7.1949e-07	7.4814e-07	7.199e-07	7.0791e-07	5.0714e-07	6.9866e-07	7.2777e-07	7.1377e-07	6.7836e-07	7.2196e-07	6.99e-07	1.36608e-06
88.8672	4.73705e-06	4.3439e-07	4.4242e-07	4.5727e-07	4.4341e-07	4.6439e-07	4.561e-07	4.6013e-07	4.6533e-07	8.859e-07	8.5186e-07	3.628e-07	3.9549e-07	3.9554e-07	3.6179e-07	3.6824e-07	8.608e-07		8.2876e-07	6.8624e-07	7.0612e-07	6.9997e-07	6.9105e-07	7.2157e-07	6.9371e-07	6.8233e-07	4.8822e-07	6.7241e-07	7.0051e-07	6.8877e-07	6.5117e-07	6.9638e-07	6.7341e-07	1.35711e-06
89.3555	4.5615e-06	4.1598e-07	4.2422e-07	4.384e-07	4.2518e-07	4.4531e-07	4.372e-07	4.4026e-07	4.4492e-07	8.6111e-07	8.1302e-07	3.4602e-07	3.7921e-07	3.7768e-07	3.4376e-07	3.5126e-07	8.2183e-07		7.9608e-07	6.5812e-07	6.7831e-07	6.7164e-07	6.6213e-07	6.9333e-07	6.6526e-07	6.5531e-07	4.7185e-07	6.4591e-07	6.7516e-07	6.6125e-07	6.2479e-07	6.7044e-07	6.4663e-07	1.32172e-06
89.8438	4.3564e-06	3.9875e-07	4.0713e-07	4.21e-07	4.0839e-07	4.2769e-07	4.1992e-07	4.2247e-07	4.2665e-07	8.1412e-07	8.0094e-07	3.316e-07	3.6446e-07	3.6158e-07	3.2909e-07	3.3543e-07	7.9478e-07		7.6708e-07	6.3e-07	6.501e-07	6.4402e-07	6.3362e-07	6.6459e-07	6.3709e-07	6.2815e-07	4.5211e-07	6.1999e-07	6.4775e-07	6.3179e-07	5.9702e-07	6.4492e-07	6.2193e-07	1.27788e-06
90.332	4.04877e-06	3.8381e-07	3.922e-07	4.0552e-07	3.9373e-07	4.1194e-07	4.0386e-07	4.0677e-07	4.1091e-07	7.6404e-07	7.5454e-07	3.191e-07	3.5115e-07	3.4741e-07	3.1673e-07	3.23e-07	7.6136e-07		7.3796e-07	6.0687e-07	6.2637e-07	6.2038e-07	6.1096e-07	6.4196e-07	6.1417e-07	6.0473e-07	4.3465e-07	5.9743e-07	6.2516e-07	6.0809e-07	5.7516e-07	6.256e-07	6.0114e-07	1.25117e-06

## Sheet: Fig 5 fig suppl 3BD
Figure 5 - figure supplement 3B
Time (sec)	Theta																																Beta
-9	-0.18038	0.052824	-0.18846	0.007717	-0.19079	0.009332	-0.18229	0.02123	-0.17774	0.059761	-0.18658	-0.00503	-0.18516	0.030425	-0.21194	-0.00607	-0.67218	-0.13748	-0.30177	0.013334	-0.14943	0.017612	-0.16539	-0.02714	-0.17046	0.01455	-0.17142	0.078735	-0.14406	0.017456	-0.57182	-1.25112	-0.69317	-0.4955	-0.72133	-0.52821	-0.71581	-0.54262	-0.72016	-0.44862	-0.72508	-0.44406	-0.72291	-0.55047	-0.74167	-0.50704	-0.81314	-0.54782	-0.64794
-7	-0.18292	0.114718	-0.21073	0.277289	-0.20899	0.259251	-0.19803	0.324909	-0.20696	0.326677	-0.22596	0.310306	-0.19187	0.306967	-0.19439	0.281409	-0.65364	0.254888	-0.64114	0.274413	-0.19608	0.405263	-0.21003	0.160438	-0.20536	0.285318	-0.21595	0.317208	-0.20613	0.326023	-0.62881	-0.84258	-0.45037	0.18341	-0.49372	0.246264	-0.49434	0.189464	-0.49336	0.30561	-0.50053	0.269671	-0.49693	0.199512	-0.50239	0.223194	-0.58888	0.195806	-0.29083
-5	-0.61153	-0.17104	-0.61297	-0.21544	-0.61439	-0.20684	-0.60374	-0.19031	-0.59652	-0.20511	-0.62943	-0.20496	-0.61291	-0.21256	-0.61771	-0.18346	-0.78484	-0.20434	-0.82177	-0.27381	-0.62004	-0.21891	-0.60477	-0.22809	-0.59857	-0.22138	-0.61955	-0.20908	-0.60541	-0.25762	-0.7976	-0.46519	-0.65096	-0.0448	-0.6102	0.137798	-0.62399	0.131309	-0.61637	0.104406	-0.59851	0.099843	-0.61153	0.05962	-0.63868	0.08417	-0.71844	0.075786	-0.69517
-3	-1.14546	-0.3923	-1.13299	-0.48214	-1.14158	-0.50415	-1.13277	-0.52611	-1.13405	-0.55663	-1.14045	-0.53925	-1.15187	-0.50147	-1.15753	-0.4668	-0.97732	-0.54405	-1.07411	-0.46132	-1.13738	-0.51867	-1.11731	-0.34594	-1.12778	-0.48704	-1.12383	-0.50006	-1.1298	-0.49661	-1.00434	-0.11209	0.132082	0.265361	0.134659	0.386443	0.136922	0.378621	0.116713	0.299031	0.122145	0.341203	0.148896	0.396937	0.110345	0.370279	0.018849	0.391375	-1.04722
-1	-0.4221	-0.29763	-0.37991	-0.40865	-0.38096	-0.46275	-0.42618	-0.5137	-0.41485	-0.50656	-0.35742	-0.46878	-0.40592	-0.42397	-0.38489	-0.41566	0.292692	-0.04957	0.209749	-0.31293	-0.42122	-0.27458	-0.45106	-0.31685	-0.40919	-0.33529	-0.4345	-0.29	-0.44098	-0.28366	0.248102	0.558322	1.49232	1.06399	1.4907	0.89708	1.45574	0.866115	1.48603	0.746482	1.47697	0.757421	1.40868	0.905528	1.45141	0.957656	1.23736	0.965205	0.46692
1	0.54307	0.42223	0.557037	0.352127	0.56308	0.341895	0.560079	0.262149	0.559936	0.271311	0.561427	0.324222	0.558711	0.311794	0.538195	0.303957	2.00847	0.442698	2.07086	0.436862	0.504921	0.412282	0.553144	0.384586	0.555336	0.378146	0.517658	0.413611	0.530945	0.3847	2.09197	2.19104	0.190165	0.590043	0.157208	0.603137	0.156337	0.654711	0.138915	0.576982	0.129422	0.480174	0.170028	0.555124	0.156463	0.60258	0.120688	0.629181	2.107
3	-0.0919	-0.23473	-0.10424	-0.20812	-0.10472	-0.1592	-0.10143	-0.17047	-0.11376	-0.17809	-0.10442	-0.06889	-0.0839	-0.19338	-0.05387	-0.21477	0.723413	-0.31691	0.779615	-0.19809	-0.08804	-0.21452	-0.09414	-0.20058	-0.08559	-0.24438	-0.08241	-0.26131	-0.09002	-0.22268	0.67317	0.415245	-0.33592	-0.33139	-0.35352	-0.45675	-0.34415	-0.42068	-0.35347	-0.47809	-0.35887	-0.49022	-0.33786	-0.39427	-0.23803	-0.4956	0.179015	-0.47938	0.317296
5	-0.21886	-0.59506	-0.21139	-0.47699	-0.20233	-0.46813	-0.21024	-0.44241	-0.20765	-0.47064	-0.20673	-0.42669	-0.1946	-0.46918	-0.21977	-0.49079	-0.55689	-0.54755	-0.52851	-0.47711	-0.23784	-0.52435	-0.22725	-0.49405	-0.22079	-0.47519	-0.20707	-0.50659	-0.22623	-0.49584	-0.45787	-0.20132	-0.4117	-0.8317	-0.39567	-0.86964	-0.3929	-0.87288	-0.39638	-0.83866	-0.38409	-0.78163	-0.40751	-0.80744	-0.41178	-0.88439	-0.38001	-0.86635	-0.503
7	0.959444	0.034213	0.943721	0.092599	0.931588	0.12913	0.947637	0.136041	0.935053	0.136107	0.939444	0.074584	0.936949	0.091558	0.967268	0.123965	0.210133	0.064618	0.020266	-0.00498	0.950429	-0.03686	0.938972	0.045626	0.884203	0.053897	0.942984	-0.06117	0.930176	0.012761	0.179722	-0.22662	0.218185	-0.23307	0.236627	-0.20108	0.239783	-0.17645	0.252812	-0.13835	0.261191	-0.13208	0.227302	-0.18673	0.264678	-0.20378	0.314955	-0.1904	-0.03994
9	1.35063	1.06677	1.33993	1.06162	1.34909	1.06146	1.34695	1.09867	1.35656	1.12316	1.35011	1.00449	1.33057	1.05981	1.33465	1.06822	0.410162	1.0377	0.286795	1.00364	1.39468	0.952725	1.37784	1.02201	1.3782	1.03137	1.39408	1.01866	1.3815	1.01548	0.267471	-0.06568	0.509366	-0.16636	0.555231	-0.21504	0.582387	-0.20758	0.585269	-0.1288	0.577355	-0.10032	0.621837	-0.17782	0.549658	-0.14707	0.629603	-0.1734	0.332882
Figure 5 - figure supplement 3Ci
Time (sec)	Theta																																Beta
-9	-0.43044	-0.43363	-0.43493	-0.43204	-0.43552	-0.4357	-0.43179	-0.43351	-0.69751	-0.67196	-0.42314	-0.42609	-0.41987	-0.4295	-0.42424	-0.70077	-0.43471	-0.42059	-0.42984	-0.43406	-0.43554	-0.44173	-0.4275	-0.41743	-0.37941	-0.41649	-0.43283	-0.41424	-0.41896	-0.42667	-0.42609	-0.68021	-0.43348	-0.42429	-0.42419	-0.42641	-0.42932	-0.41508	-0.42417	-0.41814	-0.66842	-0.66561	-0.43628	-0.43897	-0.43138	-0.44766	-0.43498	-0.68592	-0.39491
-7	-0.41723	-0.42536	-0.42434	-0.42383	-0.42122	-0.42825	-0.41722	-0.41597	-0.61367	-0.65734	-0.39048	-0.40707	-0.40433	-0.39412	-0.38827	-0.5871	-0.41775	-0.40519	-0.40426	-0.40579	-0.41417	-0.40656	-0.40685	-0.40593	-0.37585	-0.3958	-0.36897	-0.41567	-0.40054	-0.39824	-0.39406	-0.87738	-0.48512	-0.48223	-0.48666	-0.48302	-0.48074	-0.48293	-0.47303	-0.47469	-0.62035	-0.61716	-0.48091	-0.4868	-0.47279	-0.49394	-0.47559	-0.61349	-0.38831
-5	-0.42613	-0.42058	-0.42677	-0.42072	-0.41795	-0.42051	-0.41725	-0.42044	-0.7356	-0.74568	-0.42724	-0.42957	-0.42711	-0.42353	-0.42894	-0.72167	-0.37322	-0.37175	-0.35839	-0.36935	-0.36347	-0.37317	-0.34788	-0.35371	-0.35521	-0.35401	-0.33877	-0.37572	-0.36	-0.35752	-0.36089	-0.85787	-0.26127	-0.25033	-0.24548	-0.25307	-0.24229	-0.24723	-0.25365	-0.26117	-0.72095	-0.70552	-0.28108	-0.27184	-0.2626	-0.28533	-0.28269	-0.70263	-0.41637
-3	-0.54374	-0.54115	-0.54179	-0.54035	-0.53839	-0.54034	-0.5417	-0.53774	-0.79715	-0.78726	-0.54448	-0.54372	-0.54509	-0.52953	-0.55115	-0.78112	-0.58399	-0.57683	-0.56414	-0.5499	-0.55497	-0.56491	-0.57193	-0.57131	-0.55918	-0.58995	-0.59175	-0.58012	-0.58827	-0.57419	-0.5861	-0.53692	0.137744	0.143006	0.164547	0.132064	0.146152	0.150616	0.131452	0.127589	-0.74882	-0.73109	0.113707	0.125582	0.120344	0.124555	0.115313	-0.74047	-0.19061
-1	0.979742	0.996486	1.01096	0.977666	1.00189	1.02687	0.969357	0.974083	0.342556	0.389968	0.958154	0.950888	0.939999	0.951196	0.94474	0.399867	1.53997	1.50525	1.49069	1.48669	1.48817	1.49846	1.48508	1.55119	1.56797	1.48455	1.49884	1.52062	1.49868	1.50569	1.50401	1.37885	2.17443	2.18708	2.17173	2.19179	2.18691	2.19183	2.18518	2.18482	0.912923	0.927981	2.19096	2.18057	2.18354	2.1781	2.19247	0.907871	2.13802
1	1.98288	1.98253	1.97863	1.99049	1.98006	1.97372	1.98996	1.98859	2.19645	2.16462	1.98688	2.00043	2.00416	1.99748	1.99614	2.2179	1.27114	1.28979	1.30538	1.29715	1.28661	1.28824	1.28364	1.25037	1.29777	1.3008	1.28123	1.27791	1.28096	1.28166	1.28709	1.44882	0.65289	0.641462	0.645119	0.639114	0.632557	0.632308	0.644205	0.650616	2.14469	2.14459	0.652782	0.652865	0.649563	0.675138	0.655129	2.14388	0.686398
3	0.020224	0.011479	0.010499	0.013544	0.004765	0.003329	0.017397	0.01545	0.258746	0.189025	0.001901	0.012509	0.008708	0.000332	0.004046	0.270392	-0.1528	-0.15987	-0.16075	-0.15876	-0.15562	-0.14505	-0.15491	-0.16095	-0.21875	-0.16993	-0.18334	-0.15681	-0.15642	-0.18059	-0.16989	0.401234	-0.41202	-0.39048	-0.3971	-0.38666	-0.39358	-0.40266	-0.38817	-0.40301	0.079503	0.1001	-0.39469	-0.39922	-0.40062	-0.4	-0.394	0.125078	-0.32663
5	-0.45229	-0.45124	-0.45474	-0.44853	-0.45758	-0.45428	-0.45746	-0.45577	0.111045	0.007709	-0.45907	-0.45086	-0.45341	-0.47033	-0.45756	0.053597	-0.31243	-0.3227	-0.33784	-0.33535	-0.32091	-0.314	-0.31665	-0.32455	-0.36649	-0.30905	-0.3099	-0.29485	-0.31353	-0.30265	-0.30173	-0.01011	-0.44258	-0.43379	-0.43387	-0.42858	-0.43486	-0.44086	-0.44181	-0.44349	0.030668	-0.00512	-0.44387	-0.43428	-0.42982	-0.45071	-0.43306	0.030019	-0.3532
7	-0.38639	-0.38375	-0.38416	-0.38245	-0.38369	-0.38838	-0.38125	-0.38814	-0.11144	-0.00584	-0.38124	-0.38168	-0.37725	-0.38244	-0.37497	-0.16279	-0.26162	-0.27047	-0.2786	-0.2719	-0.26788	-0.27046	-0.27499	-0.28057	-0.33516	-0.28226	-0.27808	-0.2803	-0.27689	-0.28053	-0.27556	-0.03749	-0.41514	-0.46162	-0.4625	-0.46006	-0.46185	-0.46278	-0.46066	-0.45634	-0.13688	-0.11465	-0.42614	-0.42037	-0.44591	-0.43647	-0.44658	-0.13601	-0.39662
9	-0.32664	-0.33477	-0.33336	-0.33377	-0.33237	-0.33647	-0.33005	-0.32656	0.046576	0.116761	-0.32128	-0.32484	-0.32581	-0.31957	-0.31979	0.011698	-0.27458	-0.26764	-0.26226	-0.25874	-0.26222	-0.27083	-0.26801	-0.28712	-0.27569	-0.26787	-0.27642	-0.28081	-0.26503	-0.26697	-0.27678	-0.22891	-0.51544	-0.52879	-0.53159	-0.52518	-0.52298	-0.52321	-0.51935	-0.50618	-0.27237	-0.33352	-0.49447	-0.50753	-0.51033	-0.46367	-0.49601	-0.32832	-0.35776
Figure 5 - figure supplement 3Cii
Time (sec)	Theta																																Beta
-9	-0.2862	0.141002	-0.29369	0.11569	-0.29162	0.125949	-0.28924	0.058396	-0.29534	0.06477	-0.29391	0.197446	-0.28603	0.068805	-0.27307	0.087404	-0.48633	0.099685	-0.45738	0.185163	-0.28484	0.171193	-0.29273	0.082118	-0.293	0.134987	-0.29101	0.276516	-0.27991	0.213358	-0.48065	-0.99693	-0.50106	-0.31505	-0.51453	-0.44985	-0.5225	-0.43063	-0.50695	-0.42413	-0.52274	-0.40119	-0.5137	-0.44023	-0.50232	-0.46448	-0.45079	-0.53149	-0.48393
-7	-0.42313	-0.33137	-0.42904	-0.08143	-0.43337	-0.04226	-0.42525	-0.01294	-0.42696	-0.00839	-0.42893	-0.02162	-0.42435	-0.08237	-0.41894	-0.10103	-0.53618	-0.02794	-0.49113	-0.13869	-0.41104	-0.21091	-0.41971	-0.13145	-0.434	-0.11996	-0.40121	-0.20203	-0.40608	-0.15909	-0.51417	-0.71178	-0.23319	-0.3613	-0.20938	-0.37003	-0.18699	-0.36258	-0.22376	-0.33791	-0.22266	-0.32318	-0.1728	-0.31331	-0.21478	-0.3746	-0.22834	-0.35455	-0.51146
-5	-0.43346	0.088614	-0.42769	0.295757	-0.43558	0.333152	-0.4283	0.384524	-0.42789	0.333118	-0.43728	0.316028	-0.43098	0.317213	-0.43924	0.321995	-0.67493	0.285294	-0.69036	0.225797	-0.40644	0.202609	-0.42381	0.332088	-0.41665	0.308437	-0.41104	0.247515	-0.39785	0.249804	-0.66219	-0.09561	-0.48738	-0.15727	-0.45905	-0.25174	-0.45176	-0.24837	-0.46655	-0.21135	-0.45336	-0.25318	-0.43009	-0.26776	-0.45494	-0.21669	-0.47686	-0.19325	-0.58034
-3	-0.6374	-0.26689	-0.63485	-0.2716	-0.63553	-0.27712	-0.63227	-0.29755	-0.62449	-0.32248	-0.63328	-0.33688	-0.63643	-0.30842	-0.64556	-0.29121	-0.57816	-0.29658	-0.57625	-0.27679	-0.62191	-0.25812	-0.63204	-0.3502	-0.61858	-0.3219	-0.63179	-0.26161	-0.62725	-0.2976	-0.55764	0.051691	-0.01059	0.700355	0.022716	0.572763	0.043428	0.529229	-0.0214	0.506076	0.006775	0.50807	0.041374	0.467919	0.006899	0.516395	-0.01885	0.495136	-0.51727
-1	0.634742	-0.94666	0.649125	-1.03044	0.668889	-1.07163	0.635769	-1.07696	0.65335	-1.04552	0.701121	-1.06556	0.635979	-1.02365	0.636919	-1.09534	0.728982	-0.68668	0.7502	-0.95077	0.64425	-1.00685	0.629659	-0.95285	0.635875	-0.96269	0.637793	-0.96487	0.618704	-0.956	0.701136	0.625639	2.03015	-0.08396	2.01626	0.055623	1.99001	0.00525	2.05066	-0.01662	2.04698	0.003674	2.00862	-0.04187	2.0284	0.012983	2.03681	0.047339	1.17664
1	1.84548	-0.0773	1.84667	-0.29264	1.83294	-0.30137	1.85045	-0.3092	1.85204	-0.29956	1.82588	-0.31487	1.85118	-0.26943	1.8494	-0.25487	2.17446	-0.16199	2.21541	-0.25621	1.88254	-0.24142	1.89151	-0.19041	1.90204	-0.26112	1.88332	-0.30734	1.89821	-0.2636	2.24789	1.98032	0.670111	0.324957	0.65295	0.357631	0.641951	0.342926	0.655363	0.334121	0.630191	0.308112	0.623796	0.342649	0.648696	0.335961	0.660603	0.388789	2.11523
3	0.257721	0.440622	0.261389	0.360045	0.258977	0.337875	0.261059	0.363112	0.249819	0.318082	0.261798	0.369669	0.25828	0.396934	0.267538	0.389546	0.688935	0.443984	0.642256	0.439645	0.214141	0.445445	0.237794	0.420905	0.230904	0.435266	0.220472	0.371693	0.20811	0.430384	0.645417	0.967563	-0.32876	-0.308	-0.33138	-0.29229	-0.34215	-0.28504	-0.3276	-0.33977	-0.31686	-0.33047	-0.34458	-0.29208	-0.33981	-0.28182	-0.31883	-0.2541	0.164506
5	-0.25695	0.090823	-0.25905	0.110434	-0.25134	0.106773	-0.25688	0.144038	-0.26204	0.10389	-0.26628	0.078273	-0.25444	0.082846	-0.24927	0.073974	-0.32254	-0.04763	-0.3652	0.064364	-0.27733	0.115741	-0.28674	0.148346	-0.27885	0.047779	-0.27706	0.11856	-0.27767	0.07772	-0.34671	-0.41279	-0.52719	-0.04361	-0.55984	0.009118	-0.56321	0.008391	-0.54103	0.012993	-0.55173	-0.04284	-0.57139	0.014886	-0.55667	-0.00786	-0.5495	-0.0264	-0.40853
7	-0.44888	0.236411	-0.45472	0.178284	-0.45597	0.193787	-0.45683	0.189336	-0.46235	0.212655	-0.47124	0.136824	-0.46257	0.157214	-0.47123	0.145603	-0.40183	-0.01973	-0.43386	0.125001	-0.47654	0.17821	-0.45291	0.094326	-0.46609	0.135711	-0.46093	0.146865	-0.47255	0.139975	-0.41803	-0.42212	-0.23607	0.314642	-0.24765	0.372187	-0.23843	0.419962	-0.25178	0.411107	-0.25322	0.430475	-0.26061	0.448272	-0.24478	0.410743	-0.27775	0.375109	-0.43766
9	-0.25192	0.624757	-0.25816	0.615906	-0.25739	0.594849	-0.2585	0.557253	-0.25616	0.643448	-0.25788	0.640691	-0.25064	0.660854	-0.25656	0.723917	-0.5924	0.411583	-0.59368	0.582487	-0.26283	0.604103	-0.25102	0.547131	-0.26164	0.603487	-0.26854	0.574699	-0.26371	0.565048	-0.61505	-0.98597	-0.37602	-0.07076	-0.37011	-0.00342	-0.37034	0.020863	-0.36695	0.065489	-0.36336	0.100529	-0.38061	0.081529	-0.3707	0.069372	-0.37649	0.05342	-0.51719
Figure 5 - figure supplement 3Ciii
Time (sec)	Theta																																Beta
-9	-0.77807	-0.78853	-0.79173	-0.78784	-0.79102	-0.78661	-0.79559	-0.80899	-1.08144	-1.04788	-0.78883	-0.79944	-0.79771	-0.80512	-0.7945	-1.08001	-0.54452	-0.50195	-0.4748	-0.48353	-0.47333	-0.50931	-0.49716	-0.50755	-0.36672	-0.5057	-0.50607	-0.5432	-0.51155	-0.50022	-0.52913	-0.20876	-0.68273	-0.67875	-0.67761	-0.68119	-0.69131	-0.68526	-0.71482	-0.82131	-0.89741	-0.85727	-0.69668	-0.69274	-0.69779	-0.7578	-0.72322	-0.86975	-0.73806
-7	-1.02441	-1.02567	-1.02978	-1.02563	-1.0301	-1.02931	-1.02859	-1.01238	-1.04413	-1.16579	-1.01859	-1.02241	-1.03154	-1.02003	-1.01101	-1.06462	-0.28716	-0.31914	-0.30744	-0.30479	-0.30631	-0.31604	-0.32187	-0.31037	-0.26122	-0.3455	-0.40116	-0.30144	-0.34478	-0.34103	-0.35487	-0.4892	-0.68345	-0.64952	-0.64145	-0.66349	-0.65171	-0.6324	-0.64027	-0.50217	-1.17358	-1.12725	-0.75232	-0.69183	-0.69338	-0.73242	-0.7235	-1.13326	0.096548
-5	0.309916	0.311573	0.311241	0.311141	0.309543	0.305172	0.304769	0.319273	0.100996	0.220572	0.353641	0.347391	0.327456	0.356305	0.321439	0.249673	1.77251	1.75213	1.73711	1.72373	1.7199	1.74779	1.72974	1.75571	1.90551	1.74949	1.73982	1.75219	1.74603	1.7852	1.76087	1.35275	1.17618	1.19903	1.18333	1.19854	1.21494	1.1981	1.20256	1.0931	0.473018	0.458246	1.206	1.23688	1.21269	1.09969	1.20595	0.445675	1.96334
-3	0.307959	0.28892	0.294404	0.293157	0.29037	0.293217	0.29973	0.310448	0.811185	0.941841	0.376399	0.353838	0.352843	0.367384	0.35786	0.910508	0.095844	0.177113	0.168945	0.168688	0.139249	0.137945	0.152283	0.101889	0.278435	0.2277	0.183378	0.23711	0.197503	0.181068	0.217976	1.60837	0.705783	0.682365	0.679073	0.669867	0.659246	0.685456	0.673604	0.596426	0.707999	0.726721	0.744581	0.735099	0.73065	0.584527	0.720592	0.731127	0.461074
-1	1.33883	1.35552	1.36418	1.33247	1.331	1.37857	1.33994	1.32638	1.34039	1.11782	1.30538	1.28908	1.30229	1.30537	1.3044	1.22086	1.28188	1.14559	1.13208	1.11624	1.10171	1.13601	1.12675	1.24375	1.09	1.08994	1.10554	1.09017	1.11803	1.08726	1.11402	0.792143	1.51562	1.51491	1.52687	1.53603	1.51436	1.51814	1.51952	1.29944	1.71639	1.72236	1.47461	1.45252	1.46084	1.27228	1.45264	1.73036	0.955971
1	1.05523	1.07732	1.07031	1.0854	1.08917	1.06518	1.07027	1.05197	1.27512	1.14946	0.986165	1.03352	1.0312	0.992479	1.01072	1.15524	0.00127	0.008473	0.007761	0.005184	0.017164	0.039174	0.006581	0.025488	-0.10371	-0.00537	0.010005	0.002765	-0.00457	-0.03748	0.008283	-0.27392	-0.65922	-0.64589	-0.64608	-0.63251	-0.64307	-0.66649	-0.66038	-0.80243	0.977931	0.96175	-0.69294	-0.67255	-0.67998	-0.76581	-0.70745	0.993021	-0.58378
3	-0.44154	-0.44167	-0.44686	-0.43952	-0.44481	-0.45391	-0.43669	-0.45749	-0.28733	-0.32054	-0.47978	-0.47985	-0.46664	-0.4818	-0.47891	-0.32281	-0.63115	-0.63466	-0.63765	-0.63434	-0.62183	-0.6335	-0.63947	-0.65875	-0.76446	-0.65718	-0.66204	-0.63279	-0.64373	-0.67442	-0.64857	-0.43298	-0.56569	-0.56545	-0.56715	-0.57485	-0.55442	-0.57037	-0.5924	-0.69031	-0.4729	-0.57556	-0.56431	-0.59066	-0.57871	-0.57417	-0.6074	-0.45836	-0.65422
5	-0.41735	-0.4302	-0.42724	-0.42415	-0.42873	-0.43243	-0.42446	-0.39529	-0.41611	-0.48986	-0.39793	-0.41651	-0.42678	-0.39103	-0.40562	-0.41148	-0.56278	-0.49081	-0.48353	-0.46813	-0.45826	-0.49276	-0.46037	-0.50611	-0.56365	-0.46918	-0.36621	-0.46925	-0.45773	-0.44289	-0.46461	-0.62836	-0.42151	-0.44571	-0.44181	-0.44547	-0.43917	-0.4511	-0.42075	-0.21366	-0.64288	-0.64314	-0.38045	-0.41544	-0.43613	-0.18622	-0.36247	-0.62994	-0.61731
7	-0.24237	-0.23579	-0.23956	-0.23126	-0.22358	-0.23043	-0.23372	-0.24453	-0.21828	0.037921	-0.2182	-0.20496	-0.19218	-0.21065	-0.19585	-0.077	-0.45618	-0.45153	-0.44465	-0.43286	-0.42098	-0.44363	-0.40684	-0.44518	-0.5383	-0.42304	-0.39388	-0.4367	-0.43518	-0.39622	-0.42595	-0.61554	-0.13829	-0.14931	-0.14864	-0.16509	-0.14622	-0.14051	-0.10675	0.256235	-0.28602	-0.19761	-0.11658	-0.11319	-0.1033	0.262032	-0.03642	-0.32153	-0.37505
9	-0.10821	-0.11147	-0.10495	-0.11377	-0.10184	-0.10944	-0.09567	-0.08939	-0.48038	-0.44354	-0.11826	-0.10065	-0.09893	-0.11292	-0.10853	-0.58035	-0.66972	-0.68522	-0.69783	-0.69018	-0.69731	-0.66568	-0.68964	-0.69888	-0.67589	-0.66116	-0.70938	-0.69886	-0.66402	-0.66127	-0.678	-1.10449	-0.24669	-0.26169	-0.26655	-0.24186	-0.26264	-0.25556	-0.26032	-0.21531	-0.40254	-0.46825	-0.22191	-0.24808	-0.21489	-0.20209	-0.21871	-0.48734	-0.5085
Figure 5 - figure supplement 3Di
Time (sec)	Theta																																Beta
-9	0.34442	0.646654	0.364132	0.426586	0.366401	0.404019	0.377065	0.316487	0.31116	0.333849	0.309373	0.379117	0.349503	0.405753	0.29325	0.555016	2.1516	0.505983	1.91745	0.512319	0.164304	0.398006	0.265183	0.534927	0.241861	0.486901	0.168851	0.460133	0.200216	0.494259	2.03035	2.10229	-0.24781	0.551429	-0.16875	0.660702	-0.15591	0.622548	-0.17059	0.605438	-0.21362	0.589341	-0.17602	0.603728	-0.25089	0.621929	-0.63239	0.597376	2.13332
-7	-0.11329	1.22207	-0.07993	1.23028	-0.10068	1.17116	-0.08929	1.16045	-0.11909	1.15074	-0.10961	1.16716	-0.13195	1.17653	-0.2225	1.24372	0.951118	1.00162	1.11243	1.10417	-0.33705	1.00414	-0.24493	1.15249	-0.29437	1.10477	-0.34528	1.03705	-0.31328	1.15197	0.993616	0.905185	0.556951	0.158697	0.454433	0.352776	0.462671	0.368351	0.47149	0.315393	0.446129	0.348309	0.392066	0.358686	0.345006	0.346353	-0.09691	0.282309	1.27456
-5	-0.35616	0.05889	-0.37837	0.202181	-0.38626	0.259549	-0.37431	0.287667	-0.41521	0.291836	-0.42202	0.188407	-0.38983	0.211797	-0.45138	0.14028	0.022448	-0.04759	-0.09119	0.123203	-0.4169	0.305744	-0.41948	0.100742	-0.4452	0.179943	-0.43115	0.202739	-0.44056	0.143457	-0.0025	0.10124	-0.30775	-0.36445	-0.25204	-0.44212	-0.25891	-0.43153	-0.25856	-0.45673	-0.22552	-0.48118	-0.28451	-0.49715	-0.37255	-0.44446	-0.57214	-0.41618	-0.00763
-3	-0.3324	0.181231	-0.30526	0.355198	-0.29975	0.41117	-0.29263	0.393393	-0.30313	0.427348	-0.32512	0.325463	-0.32828	0.394183	-0.27639	0.332582	0.566111	0.118968	0.674564	0.279988	-0.31027	0.383555	-0.2807	0.2322	-0.31419	0.329218	-0.23626	0.307486	-0.25833	0.289427	0.756323	-0.63292	-0.36258	-0.1257	-0.30532	-0.166	-0.29074	-0.14036	-0.29869	-0.203	-0.2728	-0.18478	-0.29911	-0.22014	-0.35152	-0.16983	-0.10552	-0.15376	0.116843
-1	0.833936	0.222249	0.918736	0.182783	0.92936	0.216183	0.89684	0.265606	0.988427	0.323429	0.927339	0.210942	0.883557	0.286061	0.907014	0.178936	-0.2064	-0.03912	-0.15469	0.175244	0.737386	0.120578	0.836453	0.090625	0.893278	0.162247	0.633056	0.30205	0.750156	0.184245	-0.15541	-0.89283	0.267479	-0.29807	0.426936	-0.53679	0.365833	-0.47202	0.440755	-0.32986	0.431697	-0.30275	0.316267	-0.4452	0.380538	-0.44358	0.367991	-0.48422	-0.40785
1	0.533496	-0.26956	0.506081	-0.29176	0.517423	-0.31568	0.499876	-0.29957	0.525894	-0.28241	0.567713	-0.29483	0.541072	-0.2843	0.588985	-0.30544	-0.9179	-0.29059	-0.89513	-0.21977	0.668671	-0.3321	0.578664	-0.16685	0.598361	-0.19018	0.538874	-0.26541	0.5278	-0.24142	-0.95102	-0.69264	0.080239	-0.54511	0.023349	-0.48294	0.028242	-0.48278	0.006896	-0.48242	-0.03459	-0.48969	0.036307	-0.49726	-0.01907	-0.50014	0.055657	-0.48855	-0.69498
3	-0.10225	-0.69405	-0.17356	-0.70012	-0.18295	-0.671	-0.16964	-0.62593	-0.13941	-0.69608	-0.14937	-0.78316	-0.16069	-0.70891	-0.18303	-0.74769	-0.43077	-0.6162	-0.44412	-0.69903	0.028248	-0.76011	-0.04119	-0.78189	-0.06382	-0.71537	-0.00056	-0.72189	-0.01881	-0.72478	-0.52645	-0.02468	0.270284	0.222487	0.23721	0.432431	0.232674	0.382749	0.232774	0.484136	0.188041	0.459492	0.256927	0.435976	0.177098	0.406008	-0.09631	0.337858	-0.42069
5	-0.22567	-0.40379	-0.2899	-0.6803	-0.27829	-0.7255	-0.28929	-0.70864	-0.30441	-0.7289	-0.28985	-0.63922	-0.2748	-0.69682	-0.29096	-0.61863	-0.22766	-0.54341	-0.1719	-0.62969	-0.0718	-0.49673	-0.14401	-0.51321	-0.16748	-0.69934	-0.04265	-0.66759	-0.10085	-0.6433	-0.27395	-0.68909	0.297751	0.076855	0.250136	0.069437	0.277506	0.071077	0.255719	-0.02461	0.246272	0.025438	0.280516	0.064248	0.255184	0.075308	0.137237	0.167271	-0.13208
7	-0.52421	-0.24502	-0.54925	-0.14689	-0.52726	-0.17046	-0.54434	-0.2004	-0.54517	-0.23615	-0.50709	-0.00026	-0.49534	-0.18329	-0.36202	-0.18295	-0.95945	0.267884	-1.03169	-0.08982	-0.42437	-0.15361	-0.52607	-0.1219	-0.47983	-0.04911	-0.27284	-0.13232	-0.40431	-0.0743	-0.95654	-0.25802	-0.06304	0.219229	-0.12123	0.331044	-0.0954	0.336302	-0.12439	0.335065	-0.07599	0.280832	-0.11942	0.413603	-0.07818	0.324534	0.341422	0.349403	-0.92081
9	-0.05728	-0.71154	-0.01256	-0.57224	-0.03761	-0.57371	-0.01415	-0.58324	0.000932	-0.57787	-0.00135	-0.54815	0.00668	-0.59505	-0.00294	-0.58993	-0.9397	-0.35401	-0.90665	-0.55109	-0.03784	-0.46482	-0.02369	-0.52193	0.031072	-0.60305	-0.01192	-0.51707	0.057395	-0.57382	-0.90535	0.080658	-0.48666	0.103605	-0.53933	-0.21638	-0.56036	-0.25183	-0.5499	-0.24101	-0.48478	-0.24258	-0.39903	-0.21434	-0.08475	-0.21397	0.595025	-0.18962	-0.93136
Figure 5 - figure supplement 3Dii
Time (sec)	Theta																																Beta
-9	-0.60913	-0.83062	-0.61868	-0.85312	-0.62131	-0.86794	-0.62555	-0.87803	-0.61817	-0.88579	-0.61542	-0.89293	-0.61155	-0.86681	-0.62477	-0.83362	-0.67102	-0.75128	-0.66518	-0.85519	-0.51739	-0.86959	-0.5729	-0.81321	-0.55217	-0.85447	-0.54258	-0.87089	-0.55498	-0.87033	-0.72276	-0.7468	-0.72951	-0.52783	-0.78264	-0.54379	-0.77343	-0.55591	-0.77664	-0.564	-0.80553	-0.55819	-0.7751	-0.56435	-0.78768	-0.55838	-0.83043	-0.53418	-0.80009
-7	-0.72926	-0.58614	-0.70063	-0.52132	-0.70696	-0.54555	-0.70265	-0.54121	-0.70738	-0.53245	-0.71785	-0.53765	-0.70668	-0.51749	-0.66652	-0.50616	-0.83011	-0.51536	-0.82128	-0.51921	-0.74342	-0.51865	-0.73003	-0.52526	-0.73489	-0.50672	-0.74601	-0.55276	-0.76644	-0.53829	-0.81524	-0.8642	-0.77387	-0.41998	-0.75602	-0.56268	-0.75192	-0.5696	-0.75784	-0.59266	-0.75702	-0.60229	-0.74052	-0.59631	-0.66811	-0.58787	-0.19533	-0.56793	-0.86908
-5	-0.58222	-0.59184	-0.59991	-0.55242	-0.59336	-0.54376	-0.60207	-0.56477	-0.60577	-0.58697	-0.60585	-0.50893	-0.59277	-0.56513	-0.56219	-0.58154	-1.02045	-0.57309	-0.97092	-0.56476	-0.60475	-0.55961	-0.6066	-0.60568	-0.6005	-0.56106	-0.52949	-0.57941	-0.56608	-0.58066	-0.9903	-1.05657	-0.86702	-0.70834	-0.85135	-0.80056	-0.85716	-0.75617	-0.84888	-0.78383	-0.84681	-0.80081	-0.85132	-0.76138	-0.82405	-0.80871	-0.56119	-0.78966	-0.99016
-3	-0.72152	-0.61807	-0.72816	-0.63443	-0.72485	-0.63318	-0.72993	-0.65159	-0.73491	-0.63463	-0.73434	-0.63495	-0.74424	-0.61534	-0.75472	-0.64066	-0.90805	-0.65138	-0.94955	-0.64033	-0.69726	-0.6358	-0.73225	-0.65596	-0.72679	-0.64091	-0.6788	-0.62458	-0.68324	-0.64277	-0.84527	-0.97833	-0.60508	-0.9316	-0.61701	-0.89744	-0.61561	-0.89947	-0.619	-0.91392	-0.62217	-0.90087	-0.61618	-0.90591	-0.62539	-0.91834	-0.62703	-0.90205	-0.97817
-1	-0.76459	-0.48386	-0.75068	-0.49517	-0.75553	-0.46727	-0.75591	-0.42494	-0.72775	-0.41767	-0.72044	-0.46512	-0.74232	-0.46049	-0.74138	-0.45651	-0.79696	-0.40761	-0.87088	-0.49393	-0.79131	-0.50489	-0.766	-0.49583	-0.77075	-0.48991	-0.78215	-0.48781	-0.76768	-0.48485	-0.87467	-0.43471	0.379246	0.309072	0.40964	0.318487	0.415141	0.331086	0.396197	0.376653	0.434513	0.390952	0.401692	0.318473	0.365993	0.332543	0.280162	0.368538	-0.79906
1	0.62406	0.896823	0.629391	0.931768	0.633459	0.997508	0.636307	1.00424	0.62822	0.979904	0.633005	0.91088	0.634238	0.907881	0.628697	0.874569	0.639419	1.38223	0.726332	1.01246	0.581483	1.01978	0.582379	1.04911	0.575229	0.977309	0.572045	1.01738	0.577401	0.98027	0.723234	1.5783	1.54134	1.52998	1.5636	1.53402	1.57281	1.53529	1.55395	1.51333	1.55693	1.53439	1.57148	1.51952	1.54711	1.47942	1.38744	1.59409	0.849939
3	1.84803	1.96317	1.84991	1.9482	1.85631	1.9062	1.83021	1.87648	1.8685	1.86547	1.87779	1.92573	1.83699	1.89799	1.83983	1.97095	1.66708	1.83979	1.58494	1.8641	1.82155	1.87321	1.7995	1.86424	1.79561	1.87716	1.82784	1.88756	1.82247	1.88253	1.63369	1.24735	1.4457	1.46147	1.43281	1.53304	1.40606	1.55329	1.45184	1.56973	1.41172	1.56771	1.42278	1.56612	1.44629	1.58928	1.28004	1.48312	1.73232
5	0.817092	1.01714	0.809172	0.989871	0.797693	0.992044	0.816412	0.99021	0.792884	1.01294	0.788467	1.01146	0.81169	1.02744	0.793832	1.0233	1.08891	0.693166	1.11096	0.983488	0.839292	0.984796	0.854623	0.99293	0.843815	1.0087	0.834852	0.965342	0.844696	1.00765	1.11791	0.902972	0.20573	0.449295	0.210568	0.523941	0.220787	0.504777	0.204929	0.504014	0.203872	0.482757	0.2233	0.530995	0.197913	0.550416	0.080736	0.440533	0.939444
7	0.552808	-0.25804	0.55915	-0.32391	0.562528	-0.33715	0.5755	-0.31219	0.549392	-0.29625	0.550235	-0.29206	0.554492	-0.31314	0.548519	-0.32946	0.557744	-0.45279	0.539368	-0.3051	0.548228	-0.31242	0.606648	-0.30365	0.590843	-0.31739	0.508909	-0.30116	0.561768	-0.29066	0.479566	0.305501	-0.11019	-0.5599	-0.0841	-0.57711	-0.09012	-0.58869	-0.08702	-0.57518	-0.0776	-0.57069	-0.10072	-0.5719	-0.11217	-0.55384	-0.19639	-0.54714	0.577885
9	-0.43096	-0.50354	-0.44512	-0.48461	-0.44354	-0.49594	-0.43795	-0.49328	-0.44061	-0.49955	-0.45108	-0.51132	-0.4355	-0.49002	-0.45672	-0.51572	0.270743	-0.55809	0.313081	-0.47675	-0.43211	-0.47211	-0.43106	-0.50168	-0.41622	-0.48784	-0.46001	-0.44918	-0.46329	-0.45829	0.290906	0.046028	-0.48151	-0.5962	-0.52029	-0.52268	-0.52134	-0.54911	-0.5124	-0.52886	-0.49297	-0.53758	-0.53011	-0.52997	-0.53455	-0.51933	-0.61188	-0.53993	0.333635
Figure 5 - figure supplement 3Diii
Time (sec)	Theta																																Beta
-9	-0.59415	0.474136	-0.57025	-0.19267	-0.56644	-0.25515	-0.55975	-0.30595	-0.57458	-0.26301	-0.58537	-0.10794	-0.54354	-0.16022	-0.61553	-0.09405	-0.23938	-0.01525	-0.15373	-0.01254	-0.58497	-0.00182	-0.59465	0.265116	-0.57161	-0.04905	-0.61654	-0.0185	-0.58778	0.027663	-0.18667	-0.27205	-0.6647	0.561895	-0.67817	0.386455	-0.68378	0.319372	-0.69231	0.279545	-0.71848	0.275765	-0.70382	0.353832	-0.69858	0.352026	-0.73747	0.398533	-0.2954
-7	-0.8104	0.036328	-0.83364	-0.17784	-0.83459	-0.21028	-0.82841	-0.23199	-0.8657	-0.22463	-0.8323	-0.2555	-0.82046	-0.23156	-0.75124	-0.1878	-0.41496	-0.20846	-0.30075	-0.17887	-0.71937	-0.15528	-0.73784	-0.28826	-0.74602	-0.21561	-0.73094	-0.16644	-0.72138	-0.18302	-0.44964	0.12298	-0.70457	0.110398	-0.72407	0.121781	-0.74214	0.112562	-0.73243	0.127727	-0.74104	0.153436	-0.74624	0.136702	-0.74285	0.102007	-0.56368	0.110748	-0.46156
-5	-0.22127	-0.0317	-0.2313	0.089619	-0.24311	0.145917	-0.22631	0.119456	-0.26696	0.128279	-0.24752	0.14628	-0.21697	0.115455	-0.11992	0.12166	-1.14792	0.121075	-1.14665	0.024276	-0.20768	0.0258	-0.21151	0.063998	-0.21541	0.079669	-0.10674	0.006341	-0.18745	0.012755	-1.10204	-1.10058	-0.7526	-0.49854	-0.79134	-0.5374	-0.80885	-0.55079	-0.79041	-0.5633	-0.80623	-0.51691	-0.78461	-0.50274	-0.7446	-0.52697	-0.18369	-0.57569	-1.14084
-3	-0.39865	0.343493	-0.3598	0.463929	-0.38438	0.463131	-0.35386	0.490185	-0.38439	0.42654	-0.39023	0.44775	-0.36055	0.444076	-0.3925	0.455903	-1.18983	0.3738	-1.19434	0.495709	-0.41485	0.466777	-0.39847	0.474967	-0.38567	0.430482	-0.45361	0.458058	-0.40727	0.469895	-1.17072	-1.05034	-0.68853	0.021808	-0.71949	-0.03696	-0.72556	0.028475	-0.72706	0.022234	-0.70381	-0.0616	-0.64584	-0.04815	-0.4255	-0.03883	0.161844	-0.08218	-1.12254
-1	-0.05149	-0.30816	0.022734	-0.07477	0.018717	-0.02265	0.026287	-0.00242	0.0982	-0.03141	0.021946	-0.02718	0.011975	-0.11448	-0.03122	-0.14008	-0.88133	-0.01983	-0.91775	-0.10326	-0.12741	-0.08598	-0.09174	-0.17745	-0.04428	-0.08649	-0.09248	-0.01739	-0.09946	-0.09186	-0.888	-0.94353	-0.20507	-0.42714	-0.09136	-0.63186	-0.04084	-0.60489	-0.11803	-0.56885	-0.07085	-0.59207	-0.03256	-0.56165	-0.15616	-0.58673	-0.3199	-0.56346	-0.77787
1	0.496588	-0.40478	0.501348	-0.03343	0.513494	-0.04717	0.480173	0.012483	0.535667	0.034033	0.535759	-0.02733	0.486637	-0.02139	0.496114	-0.03251	0.256931	-0.08571	0.045318	-0.08482	0.499068	-0.12005	0.4781	-0.06683	0.451897	-0.04117	0.513922	0.061804	0.480707	-0.04556	0.06941	0.684792	1.7128	0.033685	1.72208	0.014513	1.69972	0.037903	1.72372	0.030318	1.70232	0.047618	1.70261	0.069553	1.69727	0.067742	1.34707	0.036868	0.384073
3	0.913842	-0.46424	0.916677	-0.27725	0.918765	-0.2926	0.91797	-0.3416	0.907187	-0.27724	0.918698	-0.29277	0.921368	-0.28258	0.896636	-0.31225	1.47075	-0.18345	1.37173	-0.32256	0.980024	-0.3757	0.995086	-0.28708	1.00533	-0.31926	1.02477	-0.38912	1.01439	-0.36758	1.35406	0.997466	0.941379	-0.09583	0.901104	-0.11343	0.870779	-0.10592	0.903657	-0.10353	0.879174	-0.07185	0.895312	-0.11708	0.86014	-0.09811	0.574659	-0.05715	1.71327
5	0.47076	0.02888	0.342251	-0.03871	0.381829	-0.05727	0.329671	-0.07412	0.327921	-0.03769	0.417424	-0.0285	0.30111	0.000478	0.311562	-0.02173	0.946661	0.028222	0.699016	0.048583	0.474995	0.076085	0.429101	-0.20815	0.349417	0.00019	0.365789	-0.01089	0.364414	0.032639	0.830698	0.38716	0.416504	-0.50943	0.296272	-0.36471	0.338265	-0.38991	0.389644	-0.4068	0.392798	-0.39771	0.300034	-0.42266	0.282885	-0.39775	0.09767	-0.39923	0.996358
7	0.249385	-0.20166	0.258509	-0.30341	0.25106	-0.27693	0.260704	-0.24603	0.242633	-0.32565	0.238472	-0.37152	0.263024	-0.30937	0.273551	-0.34174	0.798947	-0.4335	1.05421	-0.32247	0.275742	-0.27537	0.227087	-0.255	0.263151	-0.32092	0.26606	-0.35092	0.282357	-0.34193	1.12752	0.035471	-0.33293	-0.4027	-0.31645	-0.18342	-0.29813	-0.20402	-0.32692	-0.18702	-0.32985	-0.21401	-0.34917	-0.27498	-0.3703	-0.22215	-0.51732	-0.24887	0.687149
9	-0.05407	0.522466	-0.04607	0.53915	-0.0548	0.547533	-0.04602	0.574242	-0.01978	0.565137	-0.07612	0.511586	-0.04217	0.554054	-0.06678	0.547115	0.396178	0.418917	0.537584	0.451431	-0.17381	0.441133	-0.09422	0.473945	-0.10575	0.51699	-0.16854	0.422824	-0.13716	0.482161	0.411273	1.12736	0.274952	1.19392	0.397453	1.33171	0.386672	1.34378	0.366486	1.35611	0.392048	1.36369	0.360666	1.35364	0.294734	1.33541	0.139418	1.36676	0.017186
[truncated: 47 more columns]
