# Supplementary material for: Dissociation of impulsive traits by subthalamic metabotropic glutamate receptor 4
Source: eLife. 2022 Jan 4;11:e62123. doi: 10.7554/eLife.62123 (PMC8803315; doi:10.7554/eLife.62123)
Supplement: Figure 5—figure supplement 4—source data 1. [file elife-62123-fig5-figsupp4-data1.xlsx]

## Sheet: Fig 5 fig suppl 4A
Vehicle										mGluR PAM
Precue poke onset (sec)	Up		Down							Precue poke onset (sec)	Down
-7	0.223604	0.12954	-0.158912	-0.177159	0.336953	0.365945	-0.070134	0.487675		-7	-0.137472	-0.0327442	-0.170886	-0.0183397
-6.75	0.170493	0.118755	-0.112867	-0.206262	0.241588	0.395922	-0.00708043	0.425271		-6.75	-0.124532	-0.0352372	-0.118816	-0.0125517
-6.5	0.0738455	0.143366	-0.0556051	-0.164992	0.219406	0.39895	0.0890449	0.303546		-6.5	-0.126397	-0.0368683	-0.0295194	-0.0619599
-6.25	-0.00569134	0.203262	-0.0185994	-0.0954951	0.225085	0.391124	0.158173	0.18605		-6.25	-0.128377	-0.0361597	0.0466891	-0.111368
-6	-0.00569134	0.288594	0.0306266	-0.0419188	0.125422	0.390164	0.145119	0.104499		-6	-0.139003	-0.0238367	0.0754055	-0.121993
-5.75	0.0691898	0.368319	-0.00295597	-0.0179509	-0.0343197	0.394142	0.0675646	0.0166683		-5.75	-0.165599	0.00204002	0.0722626	-0.141297
-5.5	0.170493	0.457919	-0.0797846	-0.0178552	-0.126941	0.38505	0.0107639	-0.0851108		-5.5	-0.190932	0.0319155	0.0527562	-0.160772
-5.25	0.245371	0.577441	-0.156458	-0.0463439	-0.156221	0.347619	0.0152584	-0.130171		-5.25	-0.193379	0.0630765	0.0252043	-0.127781
-5	0.25003	0.654229	-0.190065	-0.0724896	-0.166019	0.321957	0.0513273	-0.0796672		-5	-0.19226	0.104706	0.0165456	-0.0754763
-4.75	0.188359	0.611211	-0.193821	-0.0550136	-0.171454	0.34632	0.108921	0.0168523		-4.75	-0.202724	0.14495	0.0549813	-0.0484393
-4.5	0.0934145	0.443863	-0.229624	0.00906352	-0.169874	0.426512	0.18091	0.0474518		-4.5	-0.213979	0.166765	0.140368	0.0280018
-4.25	0.0277206	0.266937	-0.266997	0.0863207	-0.16812	0.530704	0.239358	-0.0103656		-4.25	-0.213345	0.171059	0.218944	0.198423
-4	0.0162055	0.225153	-0.24916	0.134776	-0.134304	0.610637	0.28163	-0.0995725		-4	-0.215594	0.162815	0.235877	0.305138
-3.75	0.066862	0.290391	-0.163559	0.145613	-0.0652352	0.633272	0.330822	-0.145391		-3.75	-0.229118	0.135549	0.215278	0.222738
-3.5	0.12683	0.349137	-0.0646349	0.133147	-0.0107246	0.633214	0.40527	-0.142505		-3.5	-0.259344	0.100635	0.232715	0.0231612
-3.25	0.110659	0.326826	0.00827351	0.127458	0.00566119	0.607646	0.484694	-0.0830068		-3.25	-0.28105	0.0818853	0.309304	-0.149204
-3	0.0737148	0.217725	0.0496587	0.126563	-0.0241075	0.54474	0.522835	0.0168817		-3	-0.26497	0.0861173	0.391931	-0.198608
-2.75	0.0979362	0.139077	0.111708	0.117664	-0.0746079	0.489469	0.497202	0.0867049		-2.75	-0.221517	0.0996036	0.446172	-0.160606
-2.5	0.179179	0.14188	0.125161	0.121401	-0.127322	0.469821	0.409029	0.0780376		-2.5	-0.198007	0.104865	0.478319	-0.108468
-2.25	0.246003	0.161298	0.0696884	0.166741	-0.128158	0.467891	0.290183	0.033373		-2.25	-0.192285	0.109736	0.488959	-0.116985
-2	0.161443	0.16313	0.0720052	0.249659	-0.0382849	0.468816	0.147291	-0.0443598		-2	-0.166398	0.123879	0.446726	-0.157876
-1.75	0.0120479	0.167886	0.151534	0.328326	0.0704915	0.489314	0.00936133	-0.136103		-1.75	-0.120172	0.147659	0.352221	-0.154988
-1.5	-0.0804419	0.192187	0.180237	0.391651	0.112403	0.529422	-0.0968708	-0.222279		-1.5	-0.0838554	0.166484	0.232476	-0.0513354
-1.25	0.0314797	0.22801	0.100214	0.460229	0.0662044	0.600625	-0.143532	-0.278774		-1.25	-0.0770045	0.172075	0.148912	0.0833685
-1	0.285271	0.350208	0.0788486	0.526243	-0.0182863	0.690436	-0.115985	-0.316981		-1	-0.0927483	0.172276	0.127876	0.0968891
-0.75	0.428548	0.5372	0.140668	0.509754	-0.160903	0.711914	-0.057075	-0.338431		-0.75	-0.110735	0.169062	0.158588	-0.00482329
-0.5	0.34667	0.664669	0.160077	0.420126	-0.305835	0.608461	-0.0549284	-0.338372		-0.5	-0.145629	0.154083	0.162846	-0.0862755
-0.25	0.276174	0.670218	0.0325867	0.268754	-0.363036	0.421953	-0.165563	-0.319655		-0.25	-0.207933	0.108352	0.0626181	-0.135513
0	0.378507	0.592749	-0.117164	0.10748	-0.32127	0.278628	-0.337689	-0.316596		0	-0.295955	0.0331055	-0.131205	-0.177185
0.25	0.525811	0.578389	-0.147922	0.0233153	-0.257347	0.251998	-0.460377	-0.365145		0.25	-0.37904	-0.0483936	-0.240968	-0.141468
0.5	0.549407	0.692039	-0.0594909	0.0328037	-0.208764	0.262376	-0.471533	-0.449901		0.5	-0.418424	-0.10804	-0.201192	-0.0154478
0.75	0.543406	0.774348	-0.0426452	0.0786068	-0.151926	0.244549	-0.377485	-0.490975		0.75	-0.412805	-0.139623	-0.124551	0.0968891
1	0.600676	0.627518	-0.0712486	0.131504	-0.0452265	0.225615	-0.228523	-0.452346		1	-0.378032	-0.144309	-0.115038	0.126818
1.25	0.748474	0.366779	-0.0840437	0.166993	0.11907	0.263745	-0.0969551	-0.337061		1.25	-0.333977	-0.122646	-0.187148	0.0939889
1.5	0.924782	0.237474	-0.0796509	0.1638	0.260833	0.341862	-0.0342606	-0.193125		1.5	-0.291128	-0.0822481	-0.289397	0.0617784
1.75	1.05887	0.268456	-0.110547	0.11391	0.294883	0.427555	-0.0226461	-0.070513		1.75	-0.261446	-0.0345845	-0.358678	0.0146476
2	1.11713	0.304353	-0.13951	0.0748699	0.211755	0.492873	-0.0131939	-0.0165244		2	-0.242417	0.0166108	-0.36375	0.0229989
2.25	1.02622	0.275365	-0.103707	0.0685781	0.12874	0.532631	0.00395852	-0.0225218		2.25	-0.229452	0.0555123	-0.317072	0.0997728
2.5	0.806242	0.239336	0.00361994	0.0541278	0.116197	0.54944	0.000178563	-0.0349089		2.5	-0.211196	0.0691906	-0.242035	0.192639
2.75	0.541965	0.2612	0.12905	0.0213869	0.148396	0.564198	-0.0102503	-0.00806681		2.75	-0.191236	0.0535163	-0.151466	0.21211
3	0.358169	0.314241	0.204286	0.0118522	0.225051	0.594132	0.0161342	0.0920845		3	-0.167939	0.0168252	-0.0721228	0.12971
3.25	0.29275	0.312586	0.140044	0.0197898	0.305007	0.6131	0.0855631	0.196864		3.25	-0.1366	-0.0286803	-0.0233673	0.0231612
3.5	0.219574	0.27399	0.0151102	0.0329337	0.287885	0.596466	0.143544	0.192044		3.5	-0.119471	-0.0723634	0.00378722	-0.00693834
3.75	0.11285	0.21943	-0.0531579	0.031331	0.14662	0.558936	0.181267	0.0986853		3.75	-0.133173	-0.100647	0.0265742	0.0667813
4	0.0542764	0.181792	0.0191297	0.0304883	0.0289035	0.532721	0.215556	-0.0190455		4	-0.157496	-0.108146	0.0287894	0.162706
4.25	-0.0296481	0.140949	0.140674	0.0493877	-0.0206373	0.525797	0.250819	-0.109158		4.25	-0.164031	-0.0989628	0.0147617	0.146293
4.5	-0.114112	0.0706765	0.129054	0.065851	-0.0863836	0.51482	0.289616	-0.16087		4.5	-0.15856	-0.0805049	0.0144509	0.0173773
4.75	-0.0874253	0.0269119	-0.00724286	0.0698947	-0.159679	0.480749	0.325022	-0.177338		4.75	-0.140409	-0.0473139	0.0473778	-0.105584
5	0.00999133	0.0260444	-0.141079	0.0326019	-0.199687	0.443364	0.331571	-0.195499		5	-0.0928278	-0.00966242	0.0898557	-0.116375
5.25	-0.00152045	0.0474759	-0.193958	-0.0586212	-0.149154	0.444894	0.275802	-0.24087		5.25	-0.0501492	0.0172707	0.1176	-0.0675815
5.5	-0.105423	0.0884774	-0.174422	-0.14414	-0.01391	0.485519	0.160414	-0.265091		5.5	-0.0485573	0.0177125	0.137005	-0.0262346
5.75	-0.157644	0.158066	-0.13705	-0.168513	0.0972933	0.525134	0.0109952	-0.216953		5.75	-0.0882131	0.00116772	0.193472	-0.0183439
6	-0.148952	0.209192	-0.13705	-0.102994	0.121214	0.508295	-0.122165	-0.111119		6	-0.128941	-0.00877865	0.313387	0.0144853
6.25	-0.180029	0.217547	-0.150373	-0.00980799	0.0771133	0.446818	-0.203526	-0.0397451		6.25	-0.148402	0.00344773	0.444665	0.0754654
6.5	-0.268255	0.199926	-0.0974941	0.0387853	0.025462	0.397272	-0.229064	-0.0520114		6.5	-0.144097	0.0218844	0.492508	0.0582719
6.75	-0.308029	0.173813	-0.00710584	0.0219619	0.00266641	0.383227	-0.193976	-0.119122		6.75	-0.131145	0.0309085	0.445012	0.00658635
7	-0.25491	0.177099	0.0456426	-0.030426	0.00531187	0.39401	-0.0863516	-0.155754		7	-0.118711	0.0284198	0.357412	-0.0125599
7.25	-0.188715	0.213035	0.062845	-0.0861921	0.0378036	0.406371	0.0638688	-0.18214		7.25	-0.106059	0.0102679	0.293921	0.0202734
7.5	-0.189347	0.266269	0.100845	-0.135759	0.0205888	0.419539	0.166512	-0.227043		7.5	-0.105411	-0.0187034	0.303103	0.0532649
7.75	-0.175641	0.310773	0.100979	-0.193309	-0.0189884	0.449876	0.158118	-0.260905		7.75	-0.110901	-0.0464747	0.378611	0.0774099
8	-0.127055	0.349339	0.0278027	-0.238157	-0.00610345	0.53117	0.0632394	-0.262727		8	-0.113266	-0.0549369	0.45515	0.132602
8.25	-0.0501104	0.389438	-0.0663375	-0.271692	0.0481735	0.634804	-0.0389988	-0.222364		8.25	-0.102629	-0.0446138	0.485045	0.165598
8.5	-0.00152377	0.417755	-0.167448	-0.29331	0.12578	0.684314	-0.0920804	-0.216036		8.5	-0.0813459	-0.0323256	0.469781	0.096885
8.75	0.0316203	0.383287	-0.277859	-0.326656	0.205047	0.664651	-0.111273	-0.260197		8.75	-0.0627034	-0.0328544	0.443897	-0.0262428
9	0.0359118	0.29968	-0.365784	-0.377883	0.209026	0.629033	-0.119096	-0.310171		9	-0.0556288	-0.0295245	0.452234	-0.121997
9.25	0.0494901	0.225477	-0.363594	-0.409879	0.141645	0.636487	-0.125297	-0.30907		9.25	-0.0504782	-0.0080662	0.456939	-0.168505
9.5	0.0778724	0.180329	-0.26065	-0.412234	0.0644437	0.672353	-0.143193	-0.2423		9.5	-0.0565657	0.0204216	0.396153	-0.190705
9.75	0.130726	0.177657	-0.0951607	-0.42202	0.0370862	0.698943	-0.161497	-0.105907		9.75	-0.0788456	0.043147	0.289861	-0.160772
10	0.153386	0.180245	-0.0162693	-0.432295	-0.0183158	0.69646	-0.147579	0.0613582		10	-0.102167	0.0688679	0.185915	-0.0783724
10.25	0.086431	0.193464	-0.0756281	-0.411911	-0.134304	0.679912	-0.0942125	0.137097		10.25	-0.0983443	0.0971435	0.102545	0.000968864
10.5	0.0494835	0.228632	-0.141213	-0.360254	-0.22863	0.661533	-0.0421686	0.132595		10.5	-0.0752417	0.0976526	0.0529137	0.0117598
10.75	0.0825314	0.280799	-0.0911511	-0.318221	-0.223906	0.613097	-0.0450054	0.136121		10.75	-0.0554932	0.0758897	0.0368515	-0.00982618
11	0.135385	0.302912	0.0549431	-0.315548	-0.155178	0.545363	-0.0930354	0.163992		11	-0.0342361	0.05831	0.0191263	-0.048277
11.25	0.117646	0.26659	0.0894916	-0.384771	-0.111986	0.521476	-0.142525	0.127391		11.25	-0.015039	0.0533484	-0.0136896	-0.0727508
11.5	0.042634	0.208765	-0.00102702	-0.505242	-0.119456	0.551114	-0.15366	0.0394081		11.5	0.00625374	0.0484666	-0.0300909	-0.094789
11.75	-0.0562072	0.0960863	-0.0595008	-0.595583	-0.13303	0.576975	-0.111846	-0.02514		11.75	0.0304171	0.0468856	0.00183961	-0.0621263
12	-0.186391	0.0328308	-0.0863638	-0.589194	-0.10355	0.554773	-0.0362639	-0.056003		12	0.0590927	0.0588813	0.0585308	0.00113118
12.25	-0.316581	0.0793349	-0.114697	-0.549128	-0.0580046	0.531051	0.0372098	-0.00900021		12.25	0.0791857	0.0766716	0.0742164	0.03669
12.5	-0.3851	0.216518	-0.154893	-0.543905	-0.0167623	0.559686	0.0907154	0.0809668		12.5	0.0826196	0.09704	0.0169985	0.0281682
12.75	-0.340805	0.343542	-0.161232	-0.594359	-0.00767865	0.627667	0.107395	0.103941		12.75	0.0719948	0.122784	-0.0779689	0.0202734
13	-0.211247	0.393361	-0.178308	-0.650371	-0.0458587	0.675604	0.102763	0.0252627		13	0.0601845	0.15162	-0.152451	0.0424698
13.25	-0.067843	0.40446	-0.236601	-0.698664	-0.06584	0.682387	0.0706329	-0.0919536		13.25	0.0493181	0.170764	-0.176018	0.0717883
13.5	-0.0234173	0.40229	-0.235974	-0.684572	-0.0334822	0.693815	0.017368	-0.175631		13.5	0.0397083	0.174098	-0.146528	0.124707
13.75	-0.0547727	0.407628	-0.182958	-0.566734	0.0367029	0.720284	-0.0376679	-0.194546		13.75	0.0234087	0.178347	-0.0737198	0.0941553
14	-0.0367722	0.437721	-0.144023	-0.402186	0.0881103	0.71635	-0.0894441	-0.166975		14	0.00420089	0.189378	0.0126361	0.0201069
14.25	0.0255301	0.516357	-0.0843045	-0.319011	0.0906898	0.690988	-0.114186	-0.0877846		14.25	-0.000799428	0.203408	0.0842676	-0.0424931
14.5	-0.0170625	0.594781	-0.0226189	-0.337107	0.0948867	0.677288	-0.098862	0.0082167		14.5	0.00543103	0.198441	0.115933	-0.0891633
14.75	-0.138203	0.65393	0.00827351	-0.354246	0.140818	0.645466	-0.0526186	0.0447081		14.75	-0.00183743	0.167144	0.115468	-0.124889
15	-0.223836	0.711182	0.0409857	-0.314701	0.242909	0.53904	-0.0107493	-0.00995595		15	-0.0262502	0.129712	0.113566	-0.130672

## Sheet: Fig 5 fig suppl 4B
Vehicle									mGluR PAM
Immobility onset (sec)	Down								Immobility onset (sec)	Down
-7	0.0058405	-0.0380479	0.0703518	0.0124297	0.130283	-0.050956	0.234361		-7	0.656253	0.130544	0.0261088	0.0260443
-6.75	-0.0191399	0.0647905	0.103958	0.03362	0.209173	-0.0688332	0.15074		-6.75	0.60917	0.102285	-0.00291046	0.00313863
-6.5	-0.0445735	0.111592	0.10446	0.0659057	0.269328	-0.0478554	0.0125819		-6.5	0.619544	0.0849493	0.0035992	-0.0476244
-6.25	-0.0200082	0.0668092	0.0949374	0.119337	0.286432	0.0397993	-0.0262005		-6.25	0.645925	0.0721726	0.0111505	-0.0657609
-6	0.0812127	-0.0168419	0.140482	0.147818	0.263603	0.122933	0.0264247		-6	0.666466	0.0498945	-0.0067873	-0.0535958
-5.75	0.171397	-0.0794476	0.215292	0.113294	0.203211	0.130079	0.0785826		-5.75	0.672899	0.0271825	-0.0068646	-0.0621941
-5.5	0.160895	-0.0986399	0.226819	0.0360093	0.125582	0.0728688	0.0533128		-5.5	0.709628	0.0324361	0.0354376	-0.103294
-5.25	0.0681102	-0.0893902	0.138707	-0.0103279	0.0609114	0.0204187	-0.0068626		-5.25	0.745841	0.052924	0.0746133	-0.142181
-5	-0.0339183	-0.0750861	0.0242509	-0.00901894	0.0331249	-0.0205572	-0.069181		-5	0.750033	0.0630716	0.0746133	-0.112831
-4.75	-0.102706	-0.0625495	-0.0315978	-0.00462323	0.0400524	-0.05124	-0.0962969		-4.75	0.804183	0.0689626	0.0569629	-0.0526614
-4.5	-0.134713	-0.0407112	-0.0210144	-0.0517733	0.0476352	-0.0676336	-0.115953		-4.5	0.882623	0.0649856	0.0530069	-0.0258628
-4.25	-0.124308	-0.0295014	0.00718006	-0.0909338	0.0329264	-0.0767612	-0.0791383		-4.25	0.922377	0.0309104	0.0799107	-0.0549469
-4	-0.109531	-0.0490419	0.00280017	-0.061952	0.00511625	-0.0876492	0.0202563		-4	0.901638	-0.0242445	0.0836567	-0.0951111
-3.75	-0.106933	-0.0940556	0.0136676	0.00275268	-0.0143901	-0.0957078	0.113694		-3.75	0.860219	-0.0651937	0.0237852	-0.10167
-3.5	-0.0763943	-0.129325	0.075411	0.0525748	-0.00663341	-0.1021	0.135079		-3.5	0.817097	-0.0887221	-0.0460404	-0.115586
-3.25	-0.00025347	-0.120384	0.173276	0.111203	0.0277602	-0.105032	0.109575		-3.25	0.762174	-0.106818	-0.0513396	-0.07692
-3	0.0806705	-0.0868233	0.266836	0.195639	0.0676917	-0.0604224	0.112185		-3	0.696241	-0.128436	-0.00140885	0.0238304
-2.75	0.13116	-0.0616736	0.302086	0.271984	0.0887642	0.0222659	0.18173		-2.75	0.648423	-0.16319	0.000916669	0.114413
-2.5	0.158895	-0.053113	0.253564	0.312629	0.0907283	0.0823608	0.316005		-2.5	0.630056	-0.220758	-0.0553672	0.110721
-2.25	0.150222	-0.0401921	0.189781	0.292761	0.0737122	0.121185	0.406119		-2.25	0.634986	-0.270993	-0.0981344	0.0624964
-2	0.100229	-0.0151748	0.17873	0.225896	0.0482853	0.140543	0.302405		-2	0.650033	-0.270931	-0.1071	0.0455792
-1.75	0.0421553	0.0362676	0.189294	0.151709	0.0317706	0.155309	0.133336		-1.75	0.696571	-0.22367	-0.113741	0.0626452
-1.5	-0.0176318	0.124725	0.170359	0.130243	0.0188131	0.184958	0.0634645		-1.5	0.747289	-0.179691	-0.107176	0.0481418
-1.25	-0.0630703	0.230925	0.15031	0.162326	-0.020984	0.205366	0.112188		-1.25	0.74264	-0.193952	-0.0845173	-0.0176849
-1	-0.0951217	0.280166	0.136168	0.18338	-0.0915865	0.140548	0.123533		-1	0.600112	-0.254396	-0.0271202	-0.0678994
-0.75	-0.113485	0.251234	0.108495	0.161276	-0.17724	0.0118643	0.0434708		-0.75	0.361908	-0.325162	-0.000351122	-0.0959719
-0.5	-0.0872177	0.165465	0.0489652	0.142246	-0.257944	-0.0995627	-0.0514673		-0.5	0.11699	-0.384004	-0.0437091	-0.0913481
-0.25	-0.0215138	0.0656494	-0.00674502	0.116609	-0.320419	-0.15457	-0.100295		-0.25	-0.080896	-0.437805	-0.132659	-0.0813931
0	0.00566493	-0.0194737	-0.0164177	0.0766791	-0.361119	-0.173947	-0.0865732		0	-0.209185	-0.496624	-0.196199	-0.111821
0.25	-0.0379546	-0.0853216	-0.0214675	0.0129371	-0.376116	-0.16846	-0.0732884		0.25	-0.252073	-0.547417	-0.227958	-0.177231
0.5	-0.112876	-0.172251	-0.0842879	-0.0629112	-0.391453	-0.15625	-0.0769619		0.5	-0.245954	-0.571968	-0.229454	-0.163811
0.75	-0.160824	-0.285387	-0.164965	-0.100116	-0.419281	-0.174064	-0.0830179		0.75	-0.232627	-0.543767	-0.21173	-0.0381615
1	-0.146025	-0.352231	-0.182545	-0.0898848	-0.436534	-0.203319	-0.0343029		1	-0.233685	-0.465336	-0.191182	0.109721
1.25	-0.0749399	-0.338914	-0.120549	-0.0574358	-0.410836	-0.192494	0.0360359		1.25	-0.24907	-0.37147	-0.19514	0.11677
1.5	0.00479092	-0.295704	-0.0430533	-0.0133258	-0.357756	-0.131172	0.0298705		1.5	-0.258438	-0.297837	-0.211806	0.00655293
1.75	0.00520967	-0.261678	0.0241446	0.0575884	-0.317931	-0.0730082	-0.0439112		1.75	-0.252727	-0.247706	-0.202477	-0.104159
2	-0.055289	-0.225808	0.0849405	0.12838	-0.318801	-0.055122	-0.12568		2	-0.231229	-0.203308	-0.191471	-0.140632
2.25	-0.0682217	-0.182466	0.125547	0.184396	-0.342187	-0.053111	-0.164344		2.25	-0.212282	-0.168487	-0.16069	-0.107057
2.5	-0.036316	-0.134627	0.135047	0.260275	-0.354921	-0.02558	-0.172452		2.5	-0.201679	-0.149565	-0.10612	-0.046413
2.75	-0.00256094	-0.0608648	0.113849	0.324011	-0.337682	0.0121054	-0.151177		2.75	-0.210311	-0.126873	-0.00954904	-0.0210992
3	-0.00776943	0.037666	0.0692511	0.292396	-0.298495	0.00848518	-0.100292		3	-0.249287	-0.0769113	0.0912814	-0.016479
3.25	-0.0643471	0.0924373	-0.00138873	0.191121	-0.244691	-0.0370403	-0.0753435		3.25	-0.303268	0.00229631	0.116477	0.0420197
3.5	-0.0979533	0.089051	-0.0584139	0.0924633	-0.179812	-0.101234	-0.0652984		3.5	-0.31137	0.074059	0.0619767	0.111999
3.75	-0.0614966	0.0807765	-0.0578272	0.0403986	-0.128667	-0.132574	-0.0616278		3.75	-0.275444	0.105702	-0.0333264	0.147251
4	0.0379607	0.106468	0.0138384	0.0401146	-0.113001	-0.0958921	-0.0439083		4	-0.234578	0.0888143	-0.112114	0.096216
4.25	0.0839574	0.122226	0.0828315	0.0545718	-0.118544	-0.0153226	-0.0437929		4.25	-0.21599	0.0486418	-0.146639	0.0384583
4.5	0.0220971	0.0961979	0.0946508	0.0605985	-0.11568	0.0517352	-0.0384161		4.5	-0.182612	-0.000198288	-0.0856524	0.00932331
4.75	-0.0784844	0.0596675	0.0627758	0.0545535	-0.0834862	0.0626094	0.0242512		4.75	-0.101999	-0.038494	0.0261861	0.0056957
5	-0.11475	0.0691008	0.0372683	0.0649056	-0.0241177	0.0443616	0.104083		5	-0.0291503	-0.0443809	0.092553	-0.0377412
5.25	-0.0837212	0.109924	0.02257	0.0884201	0.0192954	0.0465584	0.0980329		5.25	-0.000164465	-0.00995336	0.0566775	-0.128955
5.5	-0.0355359	0.142085	0.00698281	0.0950542	0.0143533	0.0160867	0.00286402		5.5	0.00187721	0.0286816	-0.0068646	-0.182934
5.75	-0.0164711	0.166326	-0.0145682	0.0820681	-0.0244488	-0.044968	-0.111961		5.75	0.0060844	0.0385332	-0.0405865	-0.14695
6	-0.0566421	0.173466	-0.00321018	0.0774392	-0.0518848	-0.0896413	-0.178066		6	0.0137872	0.0170541	-0.0679266	-0.0356744
6.25	-0.0916817	0.153531	0.0321024	0.083782	-0.0597771	-0.0736418	-0.201393		6.25	-0.0050191	-0.0103709	-0.0805613	0.0648591
6.5	-0.0912355	0.115752	0.0677593	0.0602651	-0.0611542	-0.0365259	-0.22128		6.5	-0.0513751	-0.026671	-0.0841527	0.0670693
6.75	-0.0958861	0.0948688	0.099497	0.0164259	-0.0693354	-0.0229691	-0.203566		6.75	-0.0959455	-0.035498	-0.0680039	-0.00283638
7	-0.10436	0.095994	0.117315	-0.0125805	-0.0846917	-0.0571227	-0.164781		7	-0.100876	-0.0418482	-0.00813048	-0.0946943
7.25	-0.0772019	0.0944879	0.106227	-0.00312623	-0.105301	-0.115113	-0.112071		7.25	-0.0773575	-0.033441	0.0570441	-0.14916
7.5	-0.0357697	0.0710959	0.0808304	0.0451231	-0.118052	-0.160663	-0.0753465		7.5	-0.0673975	-0.011925	0.0414337	-0.146877
7.75	0.00880547	0.0500502	0.0571717	0.113643	-0.106667	-0.169984	-0.0109729		7.75	-0.0989876	0.0101455	-0.0118765	-0.10457
8	0.0511596	0.0609962	0.0604542	0.180122	-0.0638936	-0.147287	0.078695		8	-0.133498	0.0341294	-0.0409512	-0.0694467
8.25	0.0746635	0.0858325	0.0985724	0.228967	-0.0194319	-0.120734	0.133026		8.25	-0.114238	0.053528	-0.0320567	-0.0660306
8.5	0.0706863	0.105276	0.132505	0.202312	0.000772846	-0.0882916	0.0944747		8.5	-0.0465867	0.0540581	-0.022033	-0.0814667
8.75	0.0742074	0.123727	0.153938	0.111539	-0.00304527	-0.0237119	-0.0245792		8.75	0.0495163	0.0206369	-0.0144855	-0.0960437
9	0.0572306	0.130962	0.17937	0.0468253	-0.0165589	0.0804402	-0.107966		9	0.127549	-0.0411952	0.0187695	-0.0562999
9.25	-0.00340503	0.0982914	0.236958	0.0509594	-0.0219493	0.195676	-0.109903		9.25	0.147457	-0.123298	0.0503997	0.0443071
9.5	-0.0756298	0.067973	0.252115	0.0875953	-0.0290036	0.284699	-0.0926204		9.5	0.0909998	-0.207171	0.0430642	0.108513
9.75	-0.0828225	0.0774744	0.204209	0.094466	-0.0369586	0.331176	-0.114011		9.75	0.0516274	-0.258	-0.0233781	0.0768018
10	-0.0180506	0.0916734	0.145847	0.0507343	-0.0436013	0.28143	-0.174507		10	0.0622504	-0.269744	-0.0779522	0.00192907
10.25	0.0340192	0.0745144	0.0990771	-0.00831775	-0.0449882	0.162948	-0.201511		10.25	0.0756415	-0.264385	-0.113303	-0.0388226
10.5	0.046087	0.0439569	0.0212731	-0.0682335	-0.0502053	0.0503953	-0.184116		10.5	0.0407178	-0.252312	-0.154335	-0.048902
10.75	0.0358706	0.0327747	-0.0624215	-0.105971	-0.0633852	-0.0197887	-0.137456		10.75	-0.0085126	-0.215377	-0.187519	-0.0464148
11	0.017309	0.0584955	-0.109029	-0.108748	-0.064994	-0.0709554	-0.118006		11	-0.0464718	-0.148728	-0.166972	-0.045139
11.25	0.00857084	0.0956989	-0.117673	-0.0907445	-0.0634086	-0.106212	-0.137456		11.25	-0.086471	-0.0849091	-0.120021	-0.0454841
11.5	0.0177294	0.125916	-0.116837	-0.0759869	-0.0606807	-0.130632	-0.184116		11.5	-0.087558	-0.0346583	-0.0908686	-0.0425801
11.75	0.0152238	0.121205	-0.112396	-0.0595559	-0.0506089	-0.122396	-0.226893		11.75	-0.00434889	0.00260955	-0.095807	-0.0839502
12	0.00195437	0.0963575	-0.10694	-0.0417712	-0.038313	-0.0959679	-0.261887		12	0.113059	0.0251511	-0.112475	-0.133724
12.25	0.00331685	0.0823578	-0.0874632	-0.037508	-0.0386774	-0.0827834	-0.275723		12.25	0.172725	0.0201207	-0.116066	-0.137069
12.5	0.028604	0.0736862	-0.0512862	-0.0477028	-0.0441021	-0.086335	-0.240615		12.5	0.154121	-0.0137197	-0.0945411	-0.117794
12.75	-0.0172643	0.0506401	-0.0109999	-0.0687979	-0.0478069	-0.0594393	-0.139514		12.75	0.104668	-0.0475152	-0.0324214	-0.0913481
13	-0.0769467	0.00853181	0.0158332	-0.0923628	-0.0504697	-0.00057454	-0.00524128		13	0.0454488	-0.0522479	0.0467329	-0.0309824
13.25	-0.0699801	-0.0329599	0.023562	-0.132542	-0.0618855	0.0559593	0.0766457		13.25	0.0256384	-0.0197158	0.0530899	0.0831201
13.5	-0.00243912	-0.0335323	0.0123725	-0.160564	-0.0996252	0.0627469	0.0435891		13.5	0.0802152	0.0168105	-0.0158306	0.167599
13.75	0.0581649	0.00695065	-0.00833152	-0.128555	-0.149488	0.0147342	-0.0692963		13.75	0.145763	0.0405248	-0.0550083	0.200292
14	0.0870315	0.0481812	-0.0208208	-0.05413	-0.160472	-0.0246188	-0.164347		14	0.157863	0.0641226	-0.00911282	0.193183
14.25	0.100385	0.0753923	-0.0432575	0.0194147	-0.125969	0.000873021	-0.203451		14.25	0.133117	0.0844269	0.0593677	0.177603
14.5	0.0834333	0.0972346	-0.0840074	0.0532983	-0.0717156	0.060559	-0.182176		14.5	0.122492	0.0942254	0.0898609	0.138862
14.75	0.029444	0.106375	-0.101932	0.04428	-0.00752252	0.102843	-0.116069		14.75	0.0822863	0.0743944	0.112726	0.0686166
15	-0.0587314	0.102423	-0.0896946	0.0015084	0.06345	0.0928585	-0.0499584		15	0.0110377	0.0281055	0.157353	0.00824549

## Sheet: Fig 5 fig suppl 4AB Units
Figure 5 - figure supplement 4A
	Vehicle	mGluR4 PAM
Up	2	0
Down	6	4
Nonresponder	3	3
Figure 5 - figure supplement 4B
	Vehicle	mGluR4 PAM
Up	0	0
Down	7	4
Nonresponder	4	3
