# Supplementary material for: Dissociation of impulsive traits by subthalamic metabotropic glutamate receptor 4
Source: eLife. 2022 Jan 4;11:e62123. doi: 10.7554/eLife.62123 (PMC8803315; doi:10.7554/eLife.62123)
Supplement: Figure 5—source data 1. [file elife-62123-fig5-data1.xlsx]

## Sheet: Figure 4Ai
Precue poke onset (sec)	Up						Down
-7	0.263606	0.0445216	0.0476227	-0.055843	0.0666081	-0.0905878	-0.0970075	0.0400915	-0.0282535	0.0648688	0.044821	-0.207793	0.239924	-0.352262
-6.75	0.26332	0.0693893	0.0237693	-0.074737	0.0469875	-0.10138	-0.137353	0.0574927	0.0354919	0.110307	0.124192	-0.0586875	0.186387	-0.306075
-6.5	0.209189	0.0642411	0.0387294	-0.134247	0.08031	-0.0785653	-0.1474	0.0947052	0.116281	0.0906398	0.134898	0.169222	0.0157854	-0.120558
-6.25	0.162082	0.0929281	0.0858152	-0.134851	0.0852209	-0.0404367	-0.102306	0.1033	0.173531	0.0496043	0.0807687	0.314942	-0.0194278	0.0870336
-6	0.145467	0.153564	0.0863901	-0.0899439	0.0737399	-0.0206247	-0.0757122	0.0196379	0.154387	0.0233557	0.0252587	0.308531	0.123403	0.154333
-5.75	0.145771	0.162064	0.0480237	-0.048141	0.0921768	-0.0177866	-0.090864	-0.0549755	0.0253788	0.00540777	0.0246764	0.169418	0.239938	0.15407
-5.5	0.151646	0.0988942	0.0247507	-0.0580834	0.0787616	0.0174898	-0.150051	-0.0337298	-0.127525	-0.0370183	0.00546349	0.0334932	0.167507	0.218369
-5.25	0.170475	0.0539918	0.0222747	-0.0947068	0.0116582	0.093771	-0.183016	0.0711662	-0.171352	-0.119527	-0.0457405	-0.020396	0.0693227	0.290144
-5	0.226646	0.107994	0.029164	-0.121876	-0.0629976	0.149472	-0.178794	0.10639	-0.10573	-0.222909	-0.0734207	-0.0515094	0.0440994	0.255888
-4.75	0.259954	0.163	-0.00199441	-0.130119	-0.0921136	0.150602	-0.185649	0.0292019	-0.0458142	-0.266052	-0.0768282	-0.0888374	-0.0377519	0.243437
-4.5	0.20977	0.176019	-0.0544557	-0.115862	-0.0618259	0.118696	-0.215679	-0.0833956	-0.0528051	-0.226707	-0.0803588	-0.092429	-0.135936	0.306788
-4.25	0.122616	0.165548	-0.0770233	-0.107419	0.0182383	0.0940607	-0.204135	-0.101552	-0.103921	-0.15986	-0.101041	-0.0515094	-0.18004	0.34973
-4	0.0957922	0.188843	-0.03581	-0.124813	0.0885723	0.05802	-0.150852	0.00572794	-0.130706	-0.129908	-0.0991843	-0.0479178	-0.189473	0.230557
-3.75	0.131283	0.186346	-0.00382837	-0.118984	0.131495	-0.0023187	-0.141629	0.125517	-0.11909	-0.17878	-0.0845992	-0.136724	-0.189473	0.0867641
-3.5	0.184111	0.134962	0.0179435	-0.0519883	0.127536	-0.0703193	-0.170091	0.133628	-0.11114	-0.225565	-0.0179317	-0.167085	-0.189473	0.0837574
-3.25	0.191022	0.0829426	0.0450609	0.048767	0.0922882	-0.121295	-0.121944	0.0484674	-0.105295	-0.230678	0.067522	-0.0515145	-0.189473	0.129002
-3	0.160974	0.0597811	0.0409191	0.105622	0.034741	-0.115955	-0.0758006	-0.0455372	-0.0648564	-0.202879	0.144902	0.0878054	-0.189473	0.16747
-2.75	0.108149	0.0672751	0.00177159	0.099477	0.00320905	-0.0626263	-0.0944023	-0.0632791	-0.0292092	-0.163449	0.17669	0.124922	-0.189473	0.158789
-2.5	0.0794805	0.0282623	-0.0596006	0.0102425	-0.0320999	0.032033	-0.149137	-0.0144572	0.0064827	-0.0889107	0.170531	0.117739	-0.189473	0.163001
-2.25	0.0483937	-6.77007e-05	-0.0892961	-0.0665084	-0.0901108	0.115963	-0.179204	0.0373111	0.069204	-0.0219981	0.16162	0.159627	-0.189473	0.193045
-2	0.0266221	0.0146046	-0.0835176	-0.0863876	-0.0755359	0.0875963	-0.181125	0.0662147	0.165457	-0.00861154	0.139335	0.210131	-0.189473	0.18412
-1.75	0.0781772	0.0787129	-0.0531357	-0.0435058	-0.00862045	-0.0241063	-0.141361	0.0293428	0.258647	-0.0427134	0.130366	0.297757	-0.189473	0.116814
-1.5	0.172101	0.114212	-0.0215206	0.0136905	0.0524572	-0.0909992	-0.0976517	-0.066972	0.297711	-0.0896694	0.148081	0.434655	-0.189473	0.0405774
-1.25	0.237488	0.0629209	0.0177162	0.0224509	0.0892305	-0.0899994	-0.123123	-0.160706	0.22716	-0.120222	0.179795	0.488751	-0.135936	0.0405774
-1	0.23245	0.03209	0.0475511	-0.00815724	0.0595348	-0.130405	-0.168759	-0.198904	0.0611921	-0.0833888	0.169522	0.420299	-0.0377519	0.142139
-0.75	0.230761	0.0955941	0.057921	-0.0011367	-0.0167211	-0.207795	-0.148026	-0.184583	-0.109773	-0.0130002	0.093638	0.33964	0.0252323	0.281213
-0.5	0.425767	0.230048	0.0880469	0.113925	-0.0347429	-0.259788	-0.0593289	-0.181153	-0.188749	0.0157285	-0.00374533	0.274986	-0.0377519	0.332125
-0.25	0.79269	0.244566	0.222688	0.259302	0.0827568	-0.18786	0.0340103	-0.216912	-0.181691	-0.08215	-0.0500157	0.250839	-0.135936	0.193051
0	0.996305	0.109044	0.456293	0.293259	0.262742	0.00467829	0.04453	-0.256029	-0.1091	-0.247359	-0.0604458	0.251046	-0.18004	-0.0863085
0.25	0.754257	-0.0310525	0.652072	0.205553	0.361887	0.236537	-0.100576	-0.256029	0.0113693	-0.35407	-0.108738	0.213723	-0.189473	-0.271826
0.5	0.298884	-0.0419192	0.673147	0.111325	0.318626	0.316817	-0.39442	-0.229903	0.178821	-0.359587	-0.201918	0.128503	-0.189473	-0.276031
0.75	-0.0393035	0.140305	0.589431	0.102551	0.176055	0.276787	-0.571783	-0.215655	0.262811	-0.272141	-0.293137	0.0504672	-0.189473	-0.187857
1	-0.160822	0.422735	0.523444	0.156295	0.0789321	0.216813	-0.518501	-0.211046	0.205313	-0.152465	-0.292358	-3.6809e-05	-0.0823986	-0.0654399
1.25	-0.136477	0.621536	0.500303	0.175736	0.0657863	0.205954	-0.356011	-0.188349	0.0612513	-0.0822655	-0.234986	-0.075455	0.113969	0.0527718
1.5	-0.0370469	0.628045	0.475462	0.148262	0.0952186	0.197704	-0.218122	-0.164396	-0.0555375	-0.0371769	-0.20587	-0.105811	0.239938	0.11682
1.75	0.0671659	0.507383	0.400005	0.0823999	0.110368	0.123145	-0.156913	-0.169419	-0.076059	-0.0162326	-0.184127	-0.0515145	0.113969	0.0825586
2	0.149835	0.379806	0.29648	0.0396308	0.109227	0.0218902	-0.14418	-0.181227	-0.0332455	-0.00760665	-0.137109	0.0468858	-0.0823986	0.0361151
2.25	0.227922	0.300682	0.195014	0.0368243	0.0806287	-0.084079	-0.176237	-0.163215	0.00473589	0.0165014	-0.090488	0.108154	-0.170606	0.0241838
2.5	0.293637	0.222302	0.129295	0.0318256	0.0429839	-0.147767	-0.198033	-0.120671	0.00335894	0.0509085	-0.0986708	0.0806223	-0.189473	-0.014534
2.75	0.312066	0.138162	0.145321	0.0260615	0.00328556	-0.138806	-0.204036	-0.0682253	0.00575382	0.078397	-0.125511	0.0370848	-0.135936	-0.0609776
3	0.256989	0.0970069	0.195041	0.0228159	-0.0194795	-0.065027	-0.171951	-0.0492248	-0.00134399	0.0623974	-0.144333	0.0875837	-0.0377519	-0.107164
3.25	0.211981	0.120696	0.175467	0.0400241	-0.0152408	-0.0198844	-0.123276	-0.0694821	-0.0271687	0.0196926	-0.125098	0.243873	0.0252323	-0.0820966
3.5	0.237983	0.158672	0.108237	0.021355	0.00371858	-0.051997	-0.113151	-0.108527	-0.0874806	0.00179309	-0.0589408	0.376978	0.0157854	0.0021164
3.75	0.299302	0.176639	0.0710755	-0.0394888	0.0255571	-0.0895543	-0.140414	-0.135907	-0.134511	0.0372898	0.0145689	0.331705	0.0693227	0.0748455
4	0.316076	0.191723	0.0841807	-0.108362	0.0105701	-0.0771324	-0.141847	-0.124101	-0.110357	0.0635855	0.0389754	0.196749	0.186387	0.0274409
4.25	0.259199	0.198105	0.0950534	-0.154185	-0.0412778	-0.0722118	-0.0981587	-0.0611044	-0.0126603	0.0201765	-0.0283897	0.0408726	0.176954	-0.0147908
4.5	0.16047	0.169149	0.0795048	-0.162842	-0.0527185	-0.115805	-0.0585365	-0.0147203	0.0283987	-0.0334441	-0.0744104	-0.0517209	0.0157854	0.0286461
4.75	0.0722366	0.125666	0.0342627	-0.137211	0.0219253	-0.119906	-0.0322296	-0.0467833	-0.0184295	-0.0479174	-0.0424397	-0.0443365	-0.0729651	0.0780964
5	0.0379919	0.111353	0.0217846	-0.0991139	0.0951514	-0.0719046	-0.029086	-0.132481	-0.040241	-0.0380066	0.029458	-0.0479178	-0.0283184	0.137676
5.25	0.0564339	0.150086	0.0598817	-0.0916799	0.104222	-0.0192575	-0.0660028	-0.162034	-0.0216963	-0.0188626	0.0484657	-0.11637	0.0252323	0.163258
5.5	0.0884905	0.169373	0.0878261	-0.0894226	0.0940056	-0.0530276	-0.130456	-0.114394	-0.00681643	0.0149469	0.0209949	-0.150111	-0.0377519	0.0870273
5.75	0.100758	0.150114	0.072466	-0.0344422	0.0838986	-0.109568	-0.146089	-0.0635405	-0.0035697	0.0478461	-0.0104601	-0.105605	-0.135936	-0.0565153
6	0.0811872	0.102103	0.019816	0.0682882	0.072951	-0.100423	-0.0862815	-0.0706649	-0.0299988	0.0330525	-0.0479644	-0.0550959	-0.18004	-0.183401
6.25	0.034739	0.0828233	-0.0135793	0.148336	0.0143868	-0.0631896	0.04411	-0.116977	-0.0937442	-0.0527865	-0.132515	-0.0550959	-0.135936	-0.174727
6.5	-0.0144114	0.125198	-0.00613048	0.1464	-0.0518665	-0.0320848	0.131441	-0.150154	-0.115244	-0.118235	-0.203868	-0.0888374	-0.0377519	-0.0696517
6.75	-0.0686299	0.191056	0.0170461	0.0769621	-0.0688783	0.0105475	0.0931691	-0.164397	-0.0567853	-0.143013	-0.207826	-0.112783	0.0787696	0.0405901
7	-0.116201	0.206207	0.0699184	0.0149031	-0.0400256	0.0796349	-0.0379327	-0.178715	0.00371796	-0.146853	-0.177317	-0.109191	0.221044	0.0319096
7.25	-0.13666	0.160361	0.151386	-0.0117462	-0.0133275	0.161863	-0.163919	-0.182484	-0.00573316	-0.126383	-0.167324	-0.129546	0.43575	-0.0654399
7.5	-0.111483	0.0986483	0.20501	0.00101053	-0.0294762	0.226086	-0.237935	-0.151407	-0.0365576	-0.0749007	-0.188656	-0.194406	0.552814	-0.149146
7.75	-0.0851228	0.0447978	0.174485	0.0309823	-0.0387083	0.240204	-0.264013	-0.124025	-0.039094	-0.0175315	-0.243484	-0.228147	0.382212	-0.187863
8	-0.0599754	0.0356975	0.0907109	0.0308892	-0.0292078	0.167012	-0.211799	-0.140855	-0.0188662	0.00619132	-0.266916	-0.190819	0.185831	-0.15807
8.25	-0.00853264	0.0905082	0.024765	0.00370044	0.0117666	0.0831328	-0.128984	-0.165727	0.0012562	0.0205883	-0.192402	-0.0924239	0.239911	-0.136951
8.5	0.0180496	0.102852	0.0259506	-0.0132626	0.0888487	0.0264382	-0.0967967	-0.158532	-0.00110948	0.0560206	-0.0362845	-0.0177679	0.401093	-0.187857
8.75	-0.0135531	0.0277957	0.0422234	-0.00378829	0.188162	0.0192573	-0.133948	-0.0872294	-0.0712285	0.0541067	0.0837146	-0.0107962	0.328675	-0.284956
9	-0.0377595	-0.103468	0.0092859	-0.000917081	0.185371	0.0602258	-0.173738	0.00881874	-0.125711	0.000396281	0.116653	-0.075455	0.0693227	-0.306075
9.25	0.00404453	-0.189011	-0.0358822	-0.00507009	0.0982181	0.11542	-0.156089	0.0947088	-0.0840678	-0.0378114	0.0915429	-0.126165	-0.117069	-0.238512
9.5	0.0778729	-0.170214	-0.062326	-0.00152425	0.0227002	0.152841	-0.10018	0.107571	-0.0262531	-0.0171229	0.0618494	-0.0888426	-0.18004	-0.132739
9.75	0.13389	-0.0825236	-0.0706262	0.0123768	-0.0197609	0.198212	-0.0393941	0.101756	-0.00976793	0.0257836	0.0686754	0.0229402	-0.189473	-0.0487895
10	0.136516	0.0257451	-0.0641197	0.0407149	-0.0717833	0.257746	-0.00140507	0.100784	-0.0527475	0.046957	0.0902038	0.1321	-0.135936	0.0361214
10.25	0.107228	0.150019	-0.0108876	0.115895	-0.124647	0.291694	0.0504004	0.0959621	-0.109039	0.0524959	0.0654833	0.138304	-0.0377519	0.0408405
10.5	0.120604	0.250837	0.100282	0.20874	-0.145198	0.264872	0.154999	0.0507812	-0.107961	0.0948628	0.0055363	0.152243	0.0252323	-0.0401153
10.75	0.191392	0.292683	0.217812	0.258892	-0.107709	0.209557	0.263898	-0.0170395	-0.0119376	0.0939462	-0.0228825	0.186392	-0.0377519	-0.0863085
11	0.242715	0.277663	0.233862	0.232133	-0.0358252	0.15748	0.282364	-0.0845766	0.117428	0.0275914	0.0106601	0.1764	-0.0823986	-0.0267221
11.25	0.194746	0.228109	0.147104	0.194473	0.0234186	0.165559	0.17214	-0.128784	0.15006	-0.042973	0.0606763	0.0842037	-0.0283184	0.00658504
11.5	0.109403	0.172742	0.0840781	0.213329	0.0849908	0.194701	0.081077	-0.144214	0.0414026	-0.0451911	0.0870092	0.0502608	0.0787696	-0.0356467
11.75	0.0645857	0.131334	0.0863542	0.235661	0.155662	0.202823	0.08029	-0.164396	-0.102611	-0.0372075	0.107941	0.0985598	0.167507	-0.136958
12	0.0430134	0.0839056	0.116148	0.180913	0.172642	0.170617	0.0657295	-0.221525	-0.180677	-0.058785	0.137265	0.104568	0.230491	-0.229838
12.25	0.0175231	0.0163721	0.122632	0.0983041	0.148812	0.121922	0.0056599	-0.271604	-0.112058	-0.0165106	0.158707	0.0468807	0.186387	-0.280494
12.5	0.027936	-0.0325533	0.14087	0.0773174	0.127131	0.0783342	-0.055185	-0.261897	-0.00259181	0.0680905	0.156303	-0.0275689	0.0693227	-0.289418
12.75	0.0742555	0.0468139	0.179309	0.110029	0.093429	0.12005	-0.0593844	-0.200155	0.0343556	0.0850595	0.155522	-0.085251	0.0252189	-0.280487
13	0.0813102	0.190443	0.200116	0.131852	0.0079573	0.224073	-0.0135861	-0.137427	-0.0345618	-0.0157195	0.164518	-0.133137	0.0346658	-0.314743
13.25	0.0525684	0.253265	0.18899	0.0949427	-0.0731572	0.301193	0.0220215	-0.0825428	-0.063963	-0.146178	0.146837	-0.14652	-0.0377519	-0.335862
13.5	0.0665093	0.188439	0.185794	0.0277189	-0.0901238	0.266272	0.00321465	-0.0647269	-0.0237398	-0.156781	0.111264	-0.112783	-0.0288613	-0.310281
13.75	0.103398	0.0423458	0.180692	-0.0141266	-0.0668133	0.155139	-0.0528639	-0.0456745	0.0137704	-0.118938	0.0675708	-0.0347418	0.123403	-0.259625
14	0.0880008	-0.0515657	0.15429	0.0266258	-0.0661318	0.0888453	-0.08857	-0.0231034	-0.00459072	-0.106236	-0.00677126	0.0504723	0.239938	-0.242975
14.25	0.0288239	-0.0612601	0.102159	0.126491	-0.0637725	0.095296	-0.102373	-0.014524	-0.0456497	-0.121498	-0.0765005	0.0806223	0.113969	-0.183652
14.5	0.00313533	-0.0385768	0.0340136	0.1902	-0.0431087	0.0767694	-0.136211	-0.0634736	-0.040241	-0.112136	-0.082014	0.0708264	-0.0823986	-0.0443272
14.75	0.022024	0.0130201	0.0138109	0.165625	-0.0144469	-0.00295365	-0.142191	-0.0600679	0.00046661	-0.0222224	-0.0389418	0.0301132	-0.117069	0.137683
15	0.0238145	0.0927257	0.0521869	0.107512	0.029866	-0.10964	-0.128517	0.0507794	0.035495	0.0670326	0.011571	0.00955272	-0.0377519	0.255888

## Sheet: Figure 4Aii
Precue poke onset (sec)	Up											Down
-7	0.112878	-0.399012	-0.0792822	-0.0726406	-0.25555	-0.151704	-0.0521619	-0.143605	0.021077	0.0629168	0.202951	0.0622379	0.0209145	-0.0430473	-0.0843228	-0.501875
-6.75	0.0902184	-0.406998	-0.15087	-0.100107	-0.331488	-0.154428	-0.0788576	-0.1051	0.0729275	0.184465	0.0797241	0.22152	0.0719707	-0.0264394	-0.143826	-0.462768
-6.5	0.0956464	-0.35876	-0.163697	-0.172267	-0.333998	-0.147877	-0.104071	-0.0965256	0.117127	0.143522	-0.0459219	0.292892	0.114708	-0.0519481	-0.13861	-0.433231
-6.25	0.112542	-0.30237	-0.12652	-0.174388	-0.259639	-0.134611	-0.125483	-0.10554	0.0931483	0.0138122	-0.142417	0.294592	0.127851	-0.100417	-0.0599372	-0.439959
-6	0.134989	-0.293337	-0.0812409	-0.117314	-0.170101	-0.114526	-0.151899	-0.067116	0.0400816	-0.069965	-0.192016	0.239072	0.107506	-0.0866887	0.117979	-0.468532
-5.75	0.14723	-0.339327	-0.101651	-0.106303	-0.138353	-0.0806276	-0.142219	0.0213211	-0.0304589	-0.110901	-0.139638	0.091734	0.0461586	-0.0105075	0.280841	-0.488386
-5.5	0.130698	-0.385968	-0.174807	-0.145006	-0.165634	-0.0384812	-0.0933898	0.120323	-0.0770752	-0.0888435	0.00329292	-0.0792022	-0.00933728	0.0576854	0.296203	-0.501499
-5.25	0.11491	-0.398768	-0.244597	-0.162065	-0.183179	-0.0112214	-0.0711334	0.158463	-0.0776735	-0.0302962	0.104151	-0.171052	-0.0711539	0.0502328	0.113056	-0.509814
-5	0.131999	-0.365159	-0.256502	-0.135833	-0.165843	4.34508e-05	-0.0982841	0.11898	-0.0619927	-0.0350142	0.0668892	-0.190205	-0.12021	-0.00444831	-0.079407	-0.520812
-4.75	0.141882	-0.310828	-0.209075	-0.102805	-0.133364	-0.0130527	-0.120391	0.0521482	-0.0656287	-0.062068	-0.0314149	-0.183574	-0.106309	-0.0450392	-0.15778	-0.522023
-4.5	0.0833749	-0.287136	-0.142561	-0.0394111	-0.118339	-0.0505367	-0.109711	-0.0150435	-0.104175	-0.0350209	-0.0887918	-0.18177	-0.0924352	-0.063175	-0.143826	-0.525318
-4.25	0.0145918	-0.311996	-0.0770279	0.0401031	-0.157939	-0.0581768	-0.105417	-0.0545239	-0.109259	0.00120398	-0.0393267	-0.18538	-0.096908	-0.0615627	-0.0895387	-0.534571
-4	0.0196842	-0.340578	-0.0194463	0.104455	-0.23322	-0.0213431	-0.123629	-0.0633826	-0.0293363	-0.0665144	0.0604794	-0.151061	-0.127527	-0.0620834	-0.0547139	-0.539663
-3.75	0.0836044	-0.346274	0.0243909	0.119468	-0.249101	0.0310265	-0.152593	-0.0531814	0.0522579	-0.137948	0.121959	-0.0640343	-0.184883	-0.0121868	-0.0599372	-0.550528
-3.5	0.126855	-0.344079	0.0173886	0.0724557	-0.219419	0.0784533	-0.148698	-0.0534678	0.0542927	-0.132959	0.135729	0.0759828	-0.22347	0.0503624	-0.0303358	-0.570049
-3.25	0.114771	-0.357442	-0.0694411	0.0079515	-0.220822	0.117865	-0.11175	-0.0469229	0.0196007	-0.0841189	0.104144	0.183692	-0.175174	0.0222483	0.0343906	-0.578979
-3	0.105893	-0.350265	-0.160125	-0.0169669	-0.22854	0.140864	-0.0929218	-0.0494499	0.0492754	-0.0665144	0.0361289	0.190705	-0.0493294	-0.058747	0.0587762	-0.558187
-2.75	0.105112	-0.336097	-0.197693	0.011886	-0.187546	0.128976	-0.10735	-0.0647964	0.0918256	-0.0841189	-0.0685404	0.146036	0.0550953	-0.10967	0.0535528	-0.532887
-2.5	0.114408	-0.338327	-0.177789	0.0226171	-0.103439	0.0713879	-0.136124	-0.062121	0.0673223	-0.110901	-0.136081	0.182161	0.105649	-0.110605	0.0639921	-0.526665
-2.25	0.131798	-0.347136	-0.149702	0.0350657	-0.0383686	0.0236008	-0.162351	-0.00654433	0.0154885	-0.115619	-0.128896	0.266277	0.111534	-0.109893	0.0343906	-0.530314
-2	0.1954	-0.323492	-0.136857	0.047609	-0.0250498	0.04259	-0.174885	0.0697411	-0.0387138	-0.106176	-0.125975	0.337343	0.0643362	-0.11582	-0.0303358	-0.53114
-1.75	0.260856	-0.296359	-0.140854	0.0451964	-0.0123196	0.104711	-0.168365	0.069743	-0.120076	-0.142395	-0.130536	0.361247	-0.011983	-0.131241	-0.0251199	-0.530755
-1.5	0.287559	-0.285029	-0.127203	-0.0194354	0.0258735	0.185828	-0.151897	-0.0141415	-0.17032	-0.191499	-0.105799	0.357093	-0.0206658	-0.166953	0.0343906	-0.532311
-1.25	0.298327	-0.280363	-0.0929873	-0.085116	0.115305	0.305022	-0.114604	-0.0608613	-0.129273	-0.213557	-0.0416273	0.291182	0.0631696	-0.18802	0.0587762	-0.537256
-1	0.329931	-0.274151	-0.0515941	-0.103691	0.232201	0.49399	-0.0523102	0.00774798	-0.0591883	-0.218275	0.0255231	0.265966	0.179636	-0.201384	0.0239514	-0.549253
-0.75	0.422629	-0.244296	0.0358595	-0.057853	0.344838	0.725383	0.0201879	0.126656	-0.0420709	-0.218275	0.0960979	0.240977	0.230394	-0.240887	-0.0198965	-0.565963
-0.5	0.678523	-0.18053	0.179617	0.0177286	0.426914	0.945623	0.0468111	0.231836	-0.0345537	-0.218275	0.223312	0.134001	0.153543	-0.303073	-0.0843228	-0.58258
-0.25	1.10978	-0.123586	0.392628	0.116698	0.465907	1.01549	0.03712	0.310354	0.0274397	-0.191499	0.343116	0.0167445	-0.0294619	-0.369313	-0.143826	-0.585081
0	1.45038	-0.124902	0.566667	0.260914	0.433129	0.848732	0.00911605	0.355118	0.119507	-0.142395	0.390781	-0.0465833	-0.164837	-0.384049	-0.13861	-0.592317
0.25	1.36343	-0.170898	0.566087	0.369885	0.313406	0.545487	-0.037043	0.281745	0.109345	-0.0305678	0.340991	-0.0381481	-0.168128	-0.314275	-0.0895387	-0.607317
0.5	0.927213	-0.232923	0.294756	0.381453	0.155971	0.276235	-0.0735771	0.117922	0.01804	0.112021	0.295139	0.0180661	-0.0813092	-0.203416	-0.0547139	-0.602959
0.75	0.476064	-0.273068	-0.0464615	0.300491	0.0457454	0.0976177	-0.068633	-0.0150492	-0.0407198	0.313624	0.278972	0.0658504	-0.009897	-0.103636	-0.0895387	-0.570531
1	0.206379	-0.266428	-0.216526	0.245014	-0.00407348	-0.0144943	-0.0048418	-0.0514831	-0.0597945	0.45176	0.297121	0.0506876	0.0110065	-0.0833879	-0.143826	-0.53118
1.25	0.144735	-0.221508	-0.205438	0.218055	-0.00927602	-0.0754196	0.0451471	-0.0811791	-0.0496899	0.470109	0.355701	-0.0434579	0.00905608	-0.119709	-0.13861	-0.50084
1.5	0.186954	-0.168593	-0.0840252	0.180239	0.00944583	-0.117756	0.0494258	-0.123127	-0.0209421	0.336212	0.391168	-0.147454	0.0210965	-0.143484	-0.0303358	-0.471742
1.75	0.239432	-0.153957	0.0334629	0.181545	0.0193148	-0.135566	0.0423291	-0.144509	-0.00272564	0.179462	0.330707	-0.166229	0.0872504	-0.118688	0.172266	-0.463719
2	0.242068	-0.170695	0.0619166	0.233804	0.022354	-0.123579	0.036187	-0.139585	-0.0312402	0.113289	0.26935	-0.0863131	0.166498	-0.089931	0.345267	-0.485082
2.25	0.184334	-0.176159	0.0303572	0.25618	0.00554021	-0.0933469	-0.00291088	-0.120373	-0.0684058	0.0723595	0.208398	0.0421538	0.178856	-0.0614535	0.374868	-0.511614
2.5	0.0938934	-0.171112	-0.0329757	0.221054	-0.0170059	-0.0702745	-0.0292572	-0.0853511	-0.046363	-0.0035207	0.0782869	0.130495	0.0970964	0.00547513	0.261371	-0.529043
2.75	0.0495829	-0.189361	-0.0626446	0.166758	-0.11869	-0.0577284	-0.0314567	0.0113311	-0.0163725	-0.0841256	-0.0650512	0.15458	0.0101507	0.0872049	0.128411	-0.543707
3	0.0803025	-0.250408	-0.0682796	0.118789	-0.250327	-0.0658577	-0.0468415	0.0976065	-0.0339402	-0.0841256	-0.145658	0.107386	-0.021381	0.138135	0.0639847	-0.551328
3.25	0.141206	-0.303911	-0.0219913	0.0957033	-0.287387	-0.0680622	-0.0706723	0.0974543	-0.0601908	-0.0035207	-0.131658	-0.0060189	-0.0383886	0.144748	0.0935935	-0.53708
3.5	0.189277	-0.320468	0.0128063	0.153053	-0.248403	-0.053895	-0.0513226	0.0315955	-0.0755287	0.0676415	-0.00357178	-0.0841261	-0.049398	0.125202	0.147881	-0.518008
3.75	0.192217	-0.3299	-0.013056	0.200574	-0.220218	-0.0179568	-0.01795	-0.00752336	-0.0695844	0.121193	0.170367	-0.106301	-0.0691382	0.114275	0.172266	-0.509368
4	0.143043	-0.329652	-0.0468037	0.130404	-0.217466	0.0197846	-0.0147866	0.00648637	-0.0752024	0.201791	0.291405	-0.0846106	-0.113224	0.124706	0.207084	-0.50607
4.25	0.0797511	-0.313113	-0.0439206	0.0376812	-0.184794	0.0168755	-0.0586035	0.0240022	-0.117729	0.25562	0.37251	-0.0314154	-0.166177	0.124327	0.261371	-0.493684
4.5	0.0340021	-0.287293	-0.00195041	0.0032137	-0.141439	-0.0320719	-0.120391	-0.0113833	-0.168118	0.206515	0.425157	0.0487776	-0.18605	0.117966	0.266594	-0.488464
4.75	0.013939	-0.268134	-0.00274967	-0.00428849	-0.14292	-0.101028	-0.149166	-0.0773924	-0.183313	0.0944103	0.433648	0.122062	-0.177051	0.0861326	0.147881	-0.504294
5	0.0303183	-0.213749	-0.0392323	-0.0493158	-0.185769	-0.16446	-0.128258	-0.116721	-0.115148	0.0815239	0.305376	0.122554	-0.175104	0.0461512	-0.0251199	-0.534751
5.25	0.0414392	-0.143162	-0.0929541	-0.0802294	-0.221406	-0.211873	-0.0994023	-0.1025	-0.0258027	0.233284	0.0999038	0.0301061	-0.156463	0.0108168	-0.103793	-0.563508
5.5	0.0256331	-0.132856	-0.132898	-0.0664499	-0.231267	-0.21464	-0.102028	-0.105386	0.0579945	0.402662	-0.0512148	-0.0760794	-0.0890776	-0.0239687	-0.0547213	-0.583058
5.75	0.0255407	-0.19883	-0.137509	-0.0380243	-0.223186	-0.168802	-0.131685	-0.130725	0.0864785	0.394501	-0.0797595	-0.105915	-0.0130743	-0.037596	0.0291747	-0.590179
6	0.0396438	-0.267163	-0.11092	-0.0182746	-0.202341	-0.114451	-0.141991	-0.130653	0.0638037	0.170291	0.0257733	-0.137497	0.0440826	-0.0479784	0.0291747	-0.590763
6.25	0.0362776	-0.268889	-0.0720485	0.0312084	-0.209749	-0.0663144	-0.124285	-0.0509427	0.0614496	0.0544701	0.139971	-0.140926	0.0683626	-0.0662255	-0.0599372	-0.587467
6.5	0.0123463	-0.233853	-0.0905725	0.123324	-0.250151	-0.0245107	-0.0850961	0.0697411	0.106778	0.162394	0.129077	-0.101375	0.0786378	-0.0824273	-0.109008	-0.574474
6.75	0.000540435	-0.215578	-0.138842	0.177773	-0.282831	-0.0156039	-0.0213089	0.12532	0.157879	0.255627	-0.00587914	-0.0537928	0.0551556	-0.0880029	-0.0843228	-0.535864
7	0.0141399	-0.203866	-0.119247	0.171497	-0.267137	-0.0349317	0.0534389	0.112645	0.187623	0.143522	-0.0620218	-0.0518879	0.0388913	-0.0736669	-0.0547139	-0.488851
7.25	0.0629828	-0.195363	-0.0406027	0.128209	-0.250792	-0.0355947	0.108667	0.100126	0.180965	-0.05735	0.0575588	-0.0743743	0.0289938	-0.0398872	-0.0895387	-0.464934
7.5	0.115439	-0.214788	-0.0190301	0.0863628	-0.272027	0.00120624	0.110054	0.0902919	0.110044	-0.177345	0.176048	-0.0808995	0.0397404	0.00775858	-0.143826	-0.467484
7.75	0.149918	-0.249918	-0.0495959	0.0400993	-0.313709	0.0250442	0.0562111	0.0342766	-0.0228634	-0.186781	0.182568	-0.0978633	0.0752769	0.0335118	-0.168211	-0.460621
8	0.14413	-0.268931	-0.0422681	0.0451173	-0.323574	0.0229409	-0.00535065	-0.0508675	-0.109287	-0.0888435	0.104143	-0.123858	0.0772943	0.0273552	-0.143826	-0.441927
8.25	0.128153	-0.261134	-0.0129715	0.0861579	-0.27214	0.0057496	-0.0414852	-0.101163	-0.074091	0.0676415	0.0138272	-0.0641406	0.0047841	0.0244867	-0.0895387	-0.445432
8.5	0.113066	-0.23518	-0.0517161	0.0996434	-0.177846	-0.0100884	-0.0493897	-0.122977	-0.00647368	0.175022	-0.0550889	0.0815002	-0.120994	0.02721	-0.0547139	-0.460324
8.75	0.0966066	-0.21915	-0.131204	0.100872	-0.0969349	-0.0148474	-0.0356968	-0.131988	0.00727827	0.143522	-0.0194687	0.164922	-0.213376	0.0235631	-0.0895387	-0.458659
9	0.0784607	-0.218163	-0.128873	0.154008	-0.073764	-0.0148948	-0.0154427	-0.121714	0.00618324	0.0500304	0.100112	0.16471	-0.22658	0.0236507	-0.143826	-0.436795
9.25	0.0723942	-0.221847	-0.0291275	0.267468	-0.0704006	-0.0177116	-0.0106272	-0.0978662	0.00413343	-0.030303	0.169183	0.178654	-0.189473	0.0294677	-0.13861	-0.423288
9.5	0.0934023	-0.2124	0.0775277	0.312893	-0.0266144	-0.013018	-0.0220039	-0.0697144	-0.0198371	-0.0794009	0.134292	0.206456	-0.134259	0.0241188	-0.0599372	-0.413164
9.75	0.118454	-0.209411	0.109607	0.281904	0.0084053	0.016105	-0.0147905	-0.0660599	0.000797396	-0.110901	0.0428538	0.231645	-0.106869	-0.0100023	0.0291747	-0.399268
10	0.146517	-0.215679	0.0866156	0.212812	0.00204053	0.0697661	-0.000640571	-0.0737341	0.0554217	-0.115619	-0.0135425	0.299513	-0.0759392	-0.049699	0.0291747	-0.388598
10.25	0.164925	-0.223174	0.082154	0.128489	-0.000579297	0.148008	-0.0383893	-0.0303919	0.0696622	-0.106176	0.0187931	0.444119	-0.0406499	-0.0707179	-0.0599372	-0.394902
10.5	0.13939	-0.215724	0.170915	0.0452643	0.0448231	0.201699	-0.0863379	0.0491864	-0.00162593	-0.115619	0.104722	0.503172	-0.0349591	-0.0875858	-0.109008	-0.403509
10.75	0.0750738	-0.209315	0.274499	0.0215067	0.110628	0.223473	-0.0874192	0.118007	-0.058558	-0.0888435	0.130801	0.448455	-0.103379	-0.0944397	-0.0547213	-0.396029
11	0.0135053	-0.219172	0.274111	0.0899379	0.137771	0.233489	-0.0579483	0.0873282	-0.0329022	-0.0302962	0.126563	0.331404	-0.172913	-0.0866359	0.0587762	-0.395375
11.25	-0.01811	-0.232481	0.206382	0.191326	0.105281	0.237216	-0.0305626	-0.0101988	-0.0214694	-0.0350142	0.102481	0.212973	-0.156086	-0.115725	0.113063	-0.40211
11.5	-0.0426148	-0.215236	0.164589	0.228642	0.0832808	0.229117	-0.0161358	-0.087234	-0.058205	-0.062068	0.0255231	0.146627	-0.0571631	-0.152881	0.0587762	-0.411771
11.75	-0.0586067	-0.193409	0.138786	0.21259	0.0658176	0.204613	0.0025189	-0.0711358	-0.0794607	-0.00824539	-0.0381431	0.10558	0.0352881	-0.186152	-0.0251199	-0.409519
12	-0.0515955	-0.187288	0.111036	0.196207	0.00934018	0.162618	0.0212356	0.00388802	-0.0385312	0.0770842	-0.0562043	0.0386425	0.051918	-0.204064	-0.0547213	-0.396432
12.25	0.00511679	-0.175293	0.121136	0.214332	-0.0648141	0.114519	0.0778799	0.0253446	0.00596697	0.0676415	-0.0337155	-0.00743926	0.00672788	-0.22269	-0.0198965	-0.394595
12.5	0.0793714	-0.164942	0.15812	0.177842	-0.0721083	0.0876552	0.143532	-0.032015	0.0394244	-0.0129634	-0.0339008	-0.0108416	-0.0427309	-0.196175	-0.00565005	-0.413826
12.75	0.150169	-0.149076	0.166709	0.127984	0.00425406	0.119458	0.17103	-0.0760537	0.0214456	-0.0746829	-0.0563356	0.00290596	-0.0424837	-0.130494	0.00448901	-0.44536
13	0.202175	-0.138423	0.148343	0.122438	0.0844094	0.168301	0.130492	-0.0429089	-0.0313341	-0.110901	-0.0899054	-0.0246852	-0.0176671	-0.0844334	-0.000434142	-0.482274
13.25	0.223815	-0.1591	0.123205	0.129447	0.128882	0.161046	0.0582105	0.0415123	-0.0890878	-0.115619	-0.0877362	-0.0502919	0.0454947	-0.0547658	0.00448901	-0.520826
13.5	0.205237	-0.180198	0.0793876	0.11458	0.157279	0.102958	0.0340611	0.123002	-0.121663	-0.106176	-0.0327855	-0.0500868	0.0739334	-0.0397498	0.0587688	-0.540148
13.75	0.175922	-0.177663	0.0532588	0.0947511	0.156063	0.0561524	0.0608773	0.112801	-0.0707636	-0.142395	0.0480784	0.000995909	0.03547	-0.0220388	0.142665	-0.529204
14	0.143321	-0.16412	0.098466	0.0712177	0.106001	0.0588999	0.070828	0.00872892	0.0496166	-0.191499	0.0660906	0.0930505	-0.0668133	0.00426957	0.182705	-0.506589
14.25	0.11626	-0.170042	0.153789	0.0316393	0.06491	0.114025	0.0232769	-0.063179	0.161666	-0.186781	-0.0193273	0.190705	-0.172846	0.0278863	0.10784	-0.48384
14.5	0.0947427	-0.196934	0.145348	-0.0243993	0.0859465	0.176703	-0.000298175	-0.0431953	0.136593	-0.0888435	-0.117885	0.207772	-0.236292	0.0338161	0.00970491	-0.462888
14.75	0.11722	-0.202491	0.125276	-0.0516586	0.1341	0.191223	0.0485297	0.023027	0.0435343	0.040866	-0.129288	0.156277	-0.264311	0.0150061	-0.0791069	-0.456234
15	0.133626	-0.16342	0.129189	-0.0340973	0.104903	0.1603	0.117921	0.0289972	-0.0226598	0.0723662	-0.05271	0.105578	-0.213756	-0.0274565	-0.114224	-0.463661

## Sheet: Figure 4Bi
Immobility onset (sec)	Up						Down
-7	0.113699	-0.121558	-0.135327	0.0352516	-0.1719	0.116184	-0.129961	0.0506441	0.0232853	-0.152505	-0.0462106	0.0650404	0.0327389	-0.00501911
-6.75	0.146458	-0.115544	-0.156703	-0.0672526	-0.154898	0.0718188	-0.0430608	0.0300379	0.0655975	-0.152505	-0.125058	-0.0763331	0.00189849	-0.0543076
-6.5	0.195046	-0.0600014	-0.12891	-0.141381	-0.0894511	0.0559919	0.073376	0.0149734	0.0427428	-0.114751	-0.157224	-0.101294	-0.0148084	-0.10307
-6.25	0.237624	-0.0445072	-0.0983941	-0.120342	0.0270965	0.116631	0.158063	0.0191125	-0.0109852	-0.0203419	-0.172478	-0.00564634	0.0168884	-0.144972
-6	0.253405	-0.0827188	-0.0629758	-0.0509221	0.160835	0.162545	0.156265	0.057316	-0.0223497	0.082819	-0.161377	0.148929	0.0580441	-0.175507
-5.75	0.215484	-0.0885959	0.00409701	0.0173501	0.276184	0.148009	0.0752337	0.101906	0.0182425	0.103678	-0.151278	0.219616	0.0718225	-0.173046
-5.5	0.135788	-0.0709373	0.0781158	0.0205803	0.288537	0.0942272	0.00458256	0.106221	0.0632861	0.0930524	-0.176056	0.148929	0.0612032	-0.135927
-5.25	0.0844258	-0.0552539	0.110978	-0.0641105	0.209535	0.0981308	0.0161267	0.0702338	0.10892	0.221373	-0.181359	0.039689	0.0638355	-0.0799173
-5	0.0690315	-0.052597	0.0813319	-0.144521	0.0569849	0.146982	0.0466927	0.069858	0.148417	0.423041	-0.124303	0.00114523	0.0606715	-0.0403379
-4.75	0.056509	-0.0464497	0.0110766	-0.0789647	-0.00355893	0.15259	0.014618	0.10564	0.162703	0.459186	-0.0366581	0.0464902	0.0284192	-0.0403379
-4.5	0.0334415	-0.0227728	-0.0341676	0.0548055	0.0614691	0.144972	-0.0526117	0.12846	0.148417	0.221033	-0.0496236	0.103584	-0.0133821	-0.0634902
-4.25	0.0413661	0.00937802	-0.0324941	0.108142	0.164479	0.20048	-0.073526	0.0747	0.138078	-0.0177871	-0.169705	0.148929	-0.0113379	-0.0799208
-4	0.0668718	0.00179082	-0.028925	0.0824758	0.171892	0.246931	-0.0214314	-0.0400604	0.168897	-0.0842985	-0.284768	0.117177	0.0167787	-0.0774564
-3.75	0.0822912	-0.0714018	-0.0528863	0.103848	0.148034	0.213591	0.0685175	-0.158514	0.205481	-0.0663707	-0.309492	0.0328974	0.0182336	-0.0914227
-3.5	0.0826995	-0.10013	-0.0789027	0.160682	0.182102	0.153293	0.13548	-0.225337	0.167074	-0.00344654	-0.224991	0.00114523	-0.010029	-0.135927
-3.25	0.0600795	-0.0696109	-0.0546392	0.170218	0.181217	0.181805	0.108904	-0.228998	0.0756782	0.0740671	-0.105279	0.0464902	-0.0201532	-0.173046
-3	-0.0246614	-0.0665341	-0.0222413	0.138076	0.128285	0.259367	0.0298994	-0.194706	0.0101526	0.114647	-0.0314688	0.0650404	0.0113617	-0.173046
-2.75	-0.115961	-0.133074	-0.0201268	0.0802758	0.0556937	0.275773	0.0102684	-0.114461	-0.0241776	0.04062	-0.0378812	0.0782424	0.0576482	-0.121961
-2.5	-0.1545	-0.142892	-0.0189942	0.0189145	-0.0426507	0.131879	0.0393132	-0.0156654	-0.0102494	-0.0539167	-0.0460632	0.071832	0.0865789	-0.0403379
-2.25	-0.156802	-0.0835307	-0.0179899	-0.0326014	-0.16697	-0.0522074	0.0427591	0.043174	0.0719643	-0.0909478	0.0060644	0.0782424	0.0890709	0.0156723
-2	-0.159177	-0.0556989	-0.0362999	-0.114486	-0.294579	-0.128956	0.0420807	0.0436077	0.120413	-0.104256	0.0723035	0.071832	0.0934759	0.0830391
-1.75	-0.132144	-0.091617	-0.0576068	-0.208504	-0.335348	-0.0997424	0.0908408	0.0344263	0.0891718	-0.0790863	0.140291	0.0782424	0.102892	0.187953
-1.5	-0.0430423	-0.0920914	-0.0673455	-0.233311	-0.21706	-0.0549862	0.13796	0.0324218	0.0697111	-0.0284886	0.238414	0.110376	0.126907	0.272567
-1.25	0.0736504	-0.027998	-0.0585155	-0.153422	-0.0195125	-0.063783	0.143836	0.0158885	0.111165	-0.0159006	0.33348	0.187473	0.127021	0.1996
-1	0.176734	0.0394442	-0.00674132	0.0142102	0.131133	-0.0843973	0.140357	0.0319553	0.182686	-0.0560065	0.311429	0.264951	0.0782861	0.0623512
-0.75	0.329696	0.102086	0.115639	0.178071	0.204256	-0.0652081	0.106395	0.0909428	0.229678	-0.0894537	0.151351	0.25816	-0.00379279	-0.0280368
-0.5	0.518989	0.17704	0.254483	0.197114	0.223438	0.0325913	-0.0143423	0.102421	0.258046	-0.0976003	-0.052546	0.155721	-0.0678547	-0.0495239
-0.25	0.614743	0.22543	0.318335	0.0918073	0.224984	0.126914	-0.188795	0.0413521	0.212832	-0.116841	-0.227509	0.00114523	-0.0969858	-0.0493823
0	0.591611	0.193499	0.280274	0.0281468	0.254245	0.197375	-0.368643	-0.0543503	0.0778655	-0.127336	-0.315639	-0.108085	-0.133936	-0.0659511
0.25	0.507786	0.11923	0.18198	0.0918931	0.301496	0.264169	-0.516159	-0.134353	-0.0458192	-0.114623	-0.356595	-0.146629	-0.203719	-0.0938871
0.5	0.417975	0.0391378	0.0509394	0.166542	0.240629	0.32778	-0.62353	-0.159893	-0.0779638	-0.0894505	-0.378863	-0.153421	-0.240788	-0.10307
0.75	0.330349	-0.000131187	-0.0392297	0.149605	0.103412	0.350343	-0.688105	-0.118264	-0.0430639	-0.0685914	-0.373306	-0.153421	-0.209093	-0.107853
1	0.26254	-0.02051	-0.0493906	0.14489	0.0819163	0.286978	-0.664902	-0.0441949	0.0159971	-0.041201	-0.370421	-0.153421	-0.114251	-0.119497
1.25	0.191913	-0.0563951	-0.00243571	0.235141	0.197112	0.164221	-0.537809	-0.0219758	0.0414768	-0.0159038	-0.410586	-0.114877	0.00792275	-0.147433
1.5	0.116995	-0.017302	0.0656976	0.255423	0.279568	0.0684061	-0.376108	-0.00341195	0.0656425	-0.0181213	-0.46074	-0.0441901	0.10475	-0.175507
1.75	0.0445797	0.0609314	0.0842849	0.201457	0.230672	0.0143318	-0.262177	0.0527385	0.0779896	-0.0138139	-0.453113	0.0396986	0.11473	-0.117181
2	0.00209173	0.0412285	0.0347673	0.172294	0.151857	0.00386295	-0.18797	0.11954	0.110979	0.00495537	-0.401557	0.103584	0.0919176	0.0223904
2.25	-0.0155435	-0.0681437	-0.0524015	0.199347	0.105687	-0.0126901	-0.0994586	0.182627	0.164948	0.0262921	-0.321655	0.148929	0.137125	0.130157
2.5	-0.00860894	-0.115378	-0.0846183	0.154159	0.0442852	-0.0119886	-0.0251725	0.219916	0.213443	0.0175402	-0.188024	0.155721	0.255197	0.0644343
2.75	0.0261927	-0.0938848	-0.0505698	0.0637715	-0.0284904	0.00241256	0.0101004	0.209253	0.194973	0.0196332	-0.021741	0.103584	0.306259	-0.0800625
3	0.0457971	-0.120608	-0.0326564	0.00580966	-0.0768459	0.0194253	0.00642066	0.176016	0.144215	0.127095	0.132283	0.0464902	0.24739	-0.107337
3.25	0.0445005	-0.152498	-0.0531489	0.0769576	-0.0553551	0.0311419	-0.0125325	0.153953	0.13383	0.292365	0.205473	0.00114523	0.188606	-0.0147281
3.5	0.0970787	-0.113572	-0.0289728	0.206526	0.0166698	-0.0191633	-0.0328779	0.160525	0.171382	0.398221	0.213252	-0.00564634	0.169909	0.0881131
3.75	0.182339	-0.0421021	0.0164556	0.278817	0.0146781	-0.165629	-0.0564779	0.212439	0.178438	0.286436	0.109047	0.0464902	0.177384	0.0644343
4	0.146934	-0.0567058	-0.0133816	0.227049	-0.0614819	-0.344929	-0.12388	0.246442	0.146965	0.0721901	-0.0413733	0.0650404	0.155298	-0.0380186
4.25	0.00295182	-0.109101	-0.096321	0.136748	-0.132876	-0.395921	-0.190091	0.221146	0.124949	-0.0739311	-0.117587	0.0396986	0.0948344	-0.126084
4.5	-0.0910481	-0.142816	-0.119261	0.0799357	-0.0847123	-0.266003	-0.174109	0.138837	0.081206	-0.135486	-0.125385	-0.0373985	0.00493125	-0.173046
4.75	-0.0995981	-0.156882	-0.0820049	0.0833299	0.0520593	-0.0441755	-0.0818919	0.0491405	0.031372	-0.0999486	-0.201319	-0.114877	-0.0371701	-0.15908
5	-0.0966755	-0.166596	-0.0555595	0.0416127	0.148676	0.0729144	0.00418394	-0.0645844	0.0295426	0.0404924	-0.305373	-0.0695415	0.0120103	-0.096348
5.25	-0.0782129	-0.165312	-0.0684602	-0.0185387	0.0971249	0.0770347	0.0706725	-0.158185	0.0924464	0.192033	-0.3111	0.0650404	0.110404	-0.0239072
5.5	-0.0113376	-0.146786	-0.0766339	0.00152914	0.0208681	0.0198168	0.106046	-0.140052	0.150372	0.192033	-0.236789	0.15573	0.160932	-0.00075839
5.75	0.0672348	-0.116397	-0.0634437	0.0771404	0.0726909	-0.0298726	0.08595	-0.0427317	0.137054	0.0530772	-0.151645	0.0650404	0.0998001	0.0294934
6	0.111338	-0.0892154	-0.0204649	0.146556	0.193829	-0.0549514	0.0321169	0.0185421	0.0581774	-0.0576315	-0.0943844	-0.0763331	0.0333523	0.111255
6.25	0.118849	-0.0401495	0.042381	0.185401	0.22025	-0.0279339	-0.0145598	-0.0244084	0.00681206	-0.0931653	-0.0422185	-0.139837	0.0217673	0.197665
6.5	0.0967426	0.0188897	0.0549997	0.166447	0.163929	-0.0346631	-0.0440978	-0.0822167	0.0120418	-0.116841	0.0292556	-0.114877	0.0298042	0.176451
6.75	0.0699059	0.0147047	0.0283237	0.115466	0.167306	-0.0744902	-0.013635	-0.0775772	0.0519201	-0.139921	0.103179	-0.00564634	0.0501923	0.0739982
7	0.0814836	-0.0500378	0.0112679	0.0934642	0.231656	-0.0905828	0.0734643	-0.0532169	0.106	-0.112533	0.115292	0.110385	0.123311	-0.0189924
7.25	0.122708	-0.126389	0.00796629	0.119031	0.20928	-0.0520779	0.127917	-0.0420153	0.132744	-0.0329268	0.0364198	0.148929	0.20666	-0.0330967
7.5	0.126788	-0.124305	0.00728303	0.152407	0.0722543	-0.0118274	0.100207	-0.0329771	0.127575	0.0471544	-0.0618297	0.142128	0.22839	0.00416344
7.75	0.111499	-0.0612918	0.0102716	0.200494	-0.0950468	0.00976669	0.0367956	0.00122941	0.0884972	0.0406231	-0.193695	0.155721	0.18677	0.0296385
8	0.124104	0.0280546	0.0235628	0.181295	-0.232422	0.0367367	-0.00448144	-0.00170504	0.0160569	-0.0286162	-0.313388	0.117177	0.150096	0.00170252
8.25	0.138773	0.0684573	0.0302538	0.0797641	-0.258933	0.0169418	-0.00854618	-0.082315	-0.0585079	-0.0724338	-0.338391	-0.00564634	0.12994	-0.0495239
8.5	0.149035	0.0514872	0.0308594	-0.0147991	-0.207547	-0.00536171	-0.00460191	-0.153145	-0.0987392	-0.0663739	-0.30585	-0.108085	0.12877	-0.0914262
8.75	0.177599	0.0477648	0.0185747	-0.0431683	-0.117605	0.00363916	0.00329371	-0.124084	-0.0564479	-0.0367629	-0.278872	-0.0695415	0.171392	-0.10307
9	0.203835	0.0574952	-0.0040468	-0.0225529	-0.0183182	0.0118031	0.0191275	-0.0222746	0.0724649	-0.0455116	-0.219859	0.0650404	0.264957	-0.0799208
9.25	0.192304	0.0239711	-0.0453866	0.0146339	0.0880619	-0.0208187	0.0575896	0.0584869	0.209497	-0.051696	-0.101495	0.15573	0.299152	-0.0263716
9.5	0.116688	-0.0566527	-0.0685876	0.0263415	0.0785749	-0.0442244	0.101033	0.0824649	0.21546	-0.0410766	0.0131802	0.0650404	0.195258	0.0181332
9.75	0.0607816	-0.115771	-0.05402	0.0146339	-0.0148682	-0.0344444	0.10777	0.106143	0.10564	-0.0389804	0.0220034	-0.0763331	0.0773799	0.0271741
10	0.0562727	-0.143473	-0.00786929	-0.0298875	-0.0597541	-0.0369535	0.125584	0.138364	0.0184699	-0.0663739	0.000397655	-0.139837	0.0597817	0.029635
10.25	0.101061	-0.139214	0.0532122	-0.0820098	0.0522194	-0.0300232	0.17247	0.132849	0.0025649	-0.0790863	0.0113601	-0.153421	0.127078	0.0624929
10.5	0.132084	-0.134132	0.0870347	-0.09825	0.181408	-0.00728684	0.186217	0.0647908	0.0759134	-0.036766	0.00446606	-0.153421	0.134756	0.0948277
10.75	0.137286	-0.115639	0.108804	-0.030068	0.193645	0.0686566	0.121838	-0.000592485	0.167934	0.00495853	-0.0595253	-0.153421	0.0594724	0.0881096
11	0.116245	-0.134059	0.119012	0.0872792	0.104798	0.175284	0.0124452	-0.031898	0.182457	0.00926907	-0.0591971	-0.153421	-0.027561	0.0181297
11.25	0.0715829	-0.185601	0.0935916	0.161743	0.038505	0.255378	-0.0772969	-0.0555119	0.0987068	-0.0307093	0.0638473	-0.0763331	-0.0720781	-0.0519883
11.5	0.0195488	-0.212087	0.0141854	0.112511	0.0385949	0.211859	-0.125792	-0.0958124	0.0262005	-0.0494785	0.133148	0.142128	-0.084532	-0.0446021
11.75	0.00495403	-0.176005	-0.0357107	0.0250136	0.0920979	0.074656	-0.131058	-0.106234	0.050384	-0.0410766	0.0880714	0.374191	-0.0844758	0.00170252
12	0.0449854	-0.115809	-0.00775819	-0.0356554	0.231467	-0.0378052	-0.0794754	-0.0550388	0.111168	-0.0389804	0.0136918	0.374191	-0.063135	0.0156723
12.25	0.0884878	-0.123648	0.0231186	-0.0594921	0.339729	-0.0526015	0.0109869	0.0239824	0.118164	-0.0663739	-0.0793391	0.180672	-0.0344947	-0.0378769
12.5	0.0963724	-0.143645	0.0179281	-0.05983	0.37728	-0.0186488	0.116797	0.0573947	0.0697787	-0.0916712	-0.150485	0.0464805	0.0206842	-0.0915678
12.75	0.0711926	-0.160613	0.0243965	-0.0226409	0.315394	-0.000501198	0.158667	0.0139712	0.0211593	-0.0724307	-0.169339	0.014738	0.0726614	-0.0634937
13	0.0322366	-0.167371	0.0670984	0.0519066	0.215567	-0.0582613	0.091566	-0.0461948	-0.00362962	-0.0329268	-0.177663	-0.0441901	0.131515	0.0181332
13.25	0.0424796	-0.165928	0.0966623	0.125609	0.127268	-0.160308	-0.0208522	-0.0888529	-0.0179769	0.0218539	-0.195077	-0.114877	0.217397	0.0552517
13.5	0.133369	-0.149013	0.0865911	0.155977	0.0462792	-0.182454	-0.0873082	-0.0957105	-0.0215526	0.0805952	-0.137986	-0.146629	0.277042	0.0411404
13.75	0.202735	-0.138604	0.0485701	0.0578529	-0.0146862	-0.0598048	-0.0935577	-0.109922	0.0448609	0.116263	0.000415995	-0.153421	0.231891	0.0320959
14	0.171152	-0.102666	-0.00767694	-0.0836734	-0.0070042	0.099763	-0.106179	-0.146354	0.128795	0.112424	0.0742852	-0.153421	0.11162	0.0205941
14.25	0.106343	-0.0811247	-0.0665545	-0.147056	0.0260866	0.133508	-0.119125	-0.184187	0.14405	0.0532048	-0.0207825	-0.114877	0.0358949	0.00402181
14.5	0.0898266	-0.0594894	-0.106639	-0.161807	-0.000870299	0.0515482	-0.0828809	-0.186478	0.0903236	-0.00937571	-0.122346	-0.0441901	0.0371093	0.0132044
14.75	0.0706957	-0.0418409	-0.111755	-0.220454	-0.0273882	-0.0643994	-0.0315998	-0.201817	0.0295442	-0.0745237	-0.0855462	0.0011549	0.0438092	0.0370248
15	0.00799716	-0.0445836	-0.10578	-0.257486	-0.00362207	-0.183038	-0.017558	-0.238641	-0.00661394	-0.127336	0.0404699	-0.0441901	0.0350285	0.00170252

## Sheet: Figure 4Bii
Immobility onset (sec)	Up				Down
-7	-0.093696	0.129787	-0.0145159	-0.00361664	0.0061684	0.148383	-0.0993418	-0.0181247	-0.109347	0.176621	0.043388	-0.0320766	0.110684	0.201026
-6.75	-0.126977	0.124307	-0.0510496	0.0675448	-0.0294233	0.16252	-0.119745	-0.0338298	-0.0775177	0.151199	0.0272426	-0.0341987	0.129462	0.0691608
-6.5	-0.127017	0.099138	-0.0846727	0.130076	0.011418	0.130685	-0.0736167	-0.0230377	-0.0163451	0.0543711	0.0408697	-0.0484672	0.064101	-0.0904071
-6.25	-0.0951606	0.108491	-0.0682235	0.131967	0.0781492	0.0369035	-0.0485667	0.0142822	0.0626565	-0.00319171	0.075394	-0.0461513	-0.0710128	-0.138044
-6	-0.0808442	0.131755	-0.0256145	0.0659029	0.127882	-0.0132615	-0.0156858	0.0565127	0.127018	-0.0050797	0.102152	-0.0250366	-0.136564	-0.114609
-5.75	-0.0815639	0.130849	0.0180577	-0.0432446	0.196053	0.00707064	0.146684	0.147134	0.133379	-0.0023722	0.0879806	-0.0251038	-0.105252	-0.0694364
-5.5	-0.0999662	0.115547	0.0440468	-0.120015	0.279144	0.0135188	0.328594	0.225194	0.0621816	-0.0220337	0.0196164	-0.0473101	-0.0676954	-0.0350353
-5.25	-0.090245	0.113209	0.0385688	-0.126176	0.282747	0.0045566	0.324817	0.227278	-0.0196307	-0.0190516	-0.0296048	-0.0612452	-0.0930945	-0.010618
-5	-0.0435958	0.110278	0.0250697	-0.094599	0.186144	0.00138701	0.14318	0.11133	-0.0691628	0.00257416	-0.0442529	-0.0678795	-0.127524	-0.0277159
-4.75	-0.0165114	0.075578	0.0445733	-0.0776754	0.0760946	0.027944	-0.0113923	0.0362766	-0.0902572	0.0279803	-0.0221844	-0.0973832	-0.136369	-0.0730987
-4.5	-0.0402118	0.0224289	0.0284959	-0.0572453	0.0475825	0.140806	-0.0664085	0.0878091	-0.0961835	0.037536	0.00936685	-0.107775	-0.165071	-0.0901967
-4.25	-0.0602052	-0.0419188	-0.0352462	-0.0185974	0.0771677	0.270324	-0.0680839	0.155751	-0.120646	0.0466652	0.055112	-0.0633708	-0.161954	-0.0657793
-4	-0.0713296	-0.101772	-0.0911172	0.00203153	0.0782619	0.261364	-0.00394341	0.128143	-0.148513	0.0143608	0.0934962	0.00373327	-0.0710128	-0.0350353
-3.75	-0.0587901	-0.122909	-0.132711	0.038058	0.0600978	0.074428	0.143184	0.0600048	-0.143452	-0.0494621	0.0998287	0.077168	0.0762586	-0.010618
-3.5	-0.0488377	-0.0984574	-0.173903	0.105287	0.09834	-0.106014	0.248113	0.0742891	-0.0806443	-0.0619493	0.0851639	0.154919	0.145118	-0.0277159
-3.25	-0.0190081	-0.0539745	-0.220625	0.159841	0.165004	-0.176076	0.184643	0.13665	0.00291872	0.0180376	0.0950099	0.238747	0.0762586	-0.0938538
-3	0.0342888	-0.0139835	-0.242018	0.124704	0.217871	-0.128014	0.0225242	0.165954	0.0748026	0.123948	0.123094	0.277413	-0.0113838	-0.149015
-2.75	0.0755611	0.020982	-0.227502	0.0255063	0.237089	-0.0150435	-0.0629763	0.12323	0.10877	0.125736	0.144488	0.210875	0.0042722	-0.149015
-2.5	0.058967	0.0459152	-0.190822	-0.0326543	0.228835	0.0940335	-0.0667344	0.0769162	0.118611	0.0649476	0.125995	0.10298	0.0861873	-0.0730987
-2.25	0.00212865	0.0404958	-0.157378	-0.0580501	0.219489	0.166204	-0.0222387	0.0659924	0.147842	0.0847207	0.103976	0.0401958	0.107376	0.0689555
-2	-0.0355694	0.0461982	-0.178587	-0.0843244	0.234338	0.160626	0.021454	0.0209905	0.215241	0.174076	0.113026	0.0680713	0.0917196	0.190255
-1.75	-0.0467038	0.0287036	-0.217186	-0.102835	0.30027	0.116036	0.0468317	-0.052438	0.24658	0.180697	0.103622	0.130734	0.104956	0.231765
-1.5	-0.0624953	-0.0185991	-0.249264	-0.088503	0.38842	0.0622962	0.0570961	-0.0737769	0.18979	0.0951401	0.0901784	0.136477	0.110684	0.19025
-1.25	-0.0876862	-0.0110344	-0.242355	-0.0491157	0.446871	0.0209871	0.0570995	-0.0457323	0.140278	0.0545892	0.11911	0.0935568	0.117114	0.142197
-1	-0.098361	0.106511	-0.160459	0.0119705	0.399758	-0.000509336	0.0460125	0.0244904	0.14944	0.0840899	0.1794	0.0735467	0.113992	0.110671
-0.75	-0.0195854	0.208467	-0.0561745	0.0751251	0.190979	-0.0257904	0.0327257	0.0655069	0.144902	0.0914662	0.215205	0.119446	0.0795666	0.117785
-0.5	0.136186	0.19289	-0.0203287	0.102857	-0.0997337	-0.0614186	0.0412274	0.0613197	0.0997144	0.0553493	0.186052	0.143512	-0.0111887	0.114333
-0.25	0.26209	0.134516	-0.0515646	0.0905839	-0.363605	-0.111989	0.00469798	0.0605964	0.0711243	0.0328643	0.107054	0.114202	-0.124216	0.0689555
0	0.235242	0.122853	-0.0736997	0.0770049	-0.557984	-0.12612	-0.0891421	0.00418266	0.0881032	0.0436801	0.0185794	0.048467	-0.174111	-0.0033037
0.25	0.146171	0.162464	-0.0442919	0.0770809	-0.700405	-0.140439	-0.152958	-0.110268	0.12174	0.0360307	-0.0376353	-0.0227225	-0.14299	-0.0694416
0.5	0.120142	0.237939	0.0368009	0.0944241	-0.785259	-0.160364	-0.168829	-0.200024	0.0953107	-0.0358287	-0.0485307	-0.0600193	-0.0710081	-0.0901967
0.75	0.173493	0.312597	0.119785	0.10402	-0.799604	-0.133594	-0.178798	-0.20542	0.0373188	-0.0972482	-0.0180985	-0.074847	0.000968913	-0.0865343
1	0.212485	0.373881	0.128082	0.117326	-0.689481	-0.024003	-0.174895	-0.15108	0.0603784	-0.120585	0.00269629	-0.107704	0.0729459	-0.0730987
1.25	0.188318	0.405857	0.0806364	0.110984	-0.453129	0.0801171	-0.189814	-0.115069	0.152075	-0.140358	-0.0303284	-0.132364	0.13277	-0.0142803
1.5	0.114813	0.375295	0.0337398	0.105354	-0.218535	0.0725398	-0.223566	-0.154678	0.193604	-0.153182	-0.06362	-0.115568	0.151544	0.05552
1.75	0.038822	0.273265	0.0205569	0.119831	-0.109651	-0.00946885	-0.234584	-0.186809	0.139128	-0.120982	-0.0679296	-0.117056	0.129457	0.0689555
2	-0.0181479	0.176572	0.0206135	0.139295	-0.113394	-0.108201	-0.184283	-0.154195	0.0820831	-0.0521637	-0.0660952	-0.136943	0.101648	0.0652932
2.25	-0.055594	0.139229	-0.00612871	0.151267	-0.0696599	-0.16543	-0.0845416	-0.0915532	0.0546083	-0.0133452	-0.0579246	-0.120484	0.0795619	0.0799321
2.5	-0.0787146	0.144913	-0.0335487	0.107938	0.0195771	-0.203248	-0.0184522	-0.0386342	-0.0105417	-0.0123715	-0.013582	-0.0612435	0.0950276	0.0518576
2.75	-0.0863773	0.137696	-0.0473181	0.0369654	0.0638428	-0.235704	-0.088999	-0.0319259	-0.080174	-0.0227879	0.0534128	-0.0192933	0.117304	-0.0142803
3	-0.0911438	0.138196	-0.0434875	-0.0113374	0.0380472	-0.244559	-0.185568	-0.0453451	-0.0921947	-0.0503779	0.0997207	-0.035758	0.0795666	0.000142957
3.25	-0.074951	0.169721	-0.0575204	0.0351463	0.00445138	-0.207144	-0.183819	-0.0488424	-0.0706178	-0.0640127	0.11756	-0.0391855	0.0197379	0.0655037
3.5	-0.0620116	0.162065	-0.0824106	0.107836	0.00382206	-0.151293	-0.150783	-0.0266334	-0.0924805	-0.0679701	0.138568	0.043482	0.00758491	0.11779
3.75	-0.0672453	0.101865	-0.112227	0.135701	0.0187189	-0.142439	-0.152137	-0.0163269	-0.111661	-0.057113	0.148881	0.143515	0.0484449	0.0655037
4	-0.0853091	0.0458298	-0.133604	0.0911322	0.0427409	-0.155194	-0.156928	-0.0506376	-0.100085	-0.0592845	0.112172	0.151642	0.0852892	-0.0071713
4.25	-0.0939249	0.0727149	-0.117702	0.0152327	0.0459235	-0.140548	-0.104683	-0.0946685	-0.0918604	-0.0405555	0.0822467	0.0792883	0.1392	-0.044819
4.5	-0.0855179	0.174739	-0.0874618	-0.0627433	0.0183716	-0.104515	-0.0589579	-0.116875	-0.0761482	-0.0112223	0.082993	0.0204536	0.148421	-0.0279263
4.75	-0.0627887	0.26932	-0.0617396	-0.112926	-0.0115286	-0.0853201	-0.0740806	-0.127075	-0.0340271	0.0376411	0.0978053	0.00316519	0.0950323	0.0481953
5	-0.0115823	0.295786	-0.0662254	-0.0699583	-0.0381874	-0.0652058	-0.1059	-0.176396	0.0121712	0.0924964	0.122643	0.00250206	-0.00788075	0.131436
5.25	0.0300823	0.246411	-0.109403	0.0388238	-0.0532889	-0.0328589	-0.0936013	-0.258336	0.0206292	0.133547	0.159986	0.026197	-0.0866688	0.114338
5.5	0.0312885	0.165598	-0.167193	0.113034	-0.0712269	-0.0117649	0.0159015	-0.297456	0.0085367	0.119114	0.187241	0.0226517	-0.0489311	-0.0142803
5.75	-0.0158799	0.0860889	-0.19787	0.1296	-0.0967466	-0.016423	0.0995824	-0.224129	0.0132072	0.0719053	0.169808	-0.0218229	0.0795666	-0.103848
6	-0.0518386	0.0647458	-0.147907	0.0924001	-0.104727	-0.0492921	0.0801205	-0.095048	0.0354475	0.072995	0.1069	-0.0551756	0.163892	-0.0657845
6.25	-0.0383342	0.100569	-0.0512959	0.0812847	-0.109756	-0.0170488	-0.0394493	0.0413008	0.0390505	0.109395	0.040704	-0.0460824	0.148236	0.0274455
6.5	0.000195773	0.125953	-0.00524407	0.112466	-0.122052	0.089479	-0.142569	0.102445	0.0116032	0.090712	0.00602025	0.00857523	0.0607883	0.0933729
6.75	0.0181978	0.058549	-0.039347	0.137516	-0.121848	0.135345	-0.158634	0.116424	-0.00614026	0.0159697	-0.00813318	0.0551065	-0.00807112	0.103357
7	0.0168816	-0.0793022	-0.0671324	0.114035	-0.112189	0.0800081	-0.0741539	0.0687179	0.0173143	-0.0325096	-0.00998696	0.0620034	-0.0332751	0.09703
7.25	0.00690788	-0.161295	-0.0712693	0.039476	-0.116382	-0.0398185	0.0882859	-0.000932189	0.0714041	-0.0666564	-0.00338365	0.0550323	-0.0268401	0.0762698
7.5	0.00322685	-0.115392	-0.0680782	-0.0581271	-0.104907	-0.138766	0.217671	-0.0656554	0.117878	-0.12581	0.031051	0.0517514	-0.0365831	0.0652932
7.75	-0.022077	-0.0230675	-0.0633879	-0.10034	-0.0624274	-0.145723	0.239872	-0.067655	0.130312	-0.17463	0.053476	0.0389733	-0.0334608	0.100687
8	-0.0335256	0.0365416	-0.0292417	-0.0667963	-0.0350494	-0.108196	0.183681	-0.0025282	0.0997437	-0.160835	0.0143526	0.0328295	-0.0111887	0.110676
8.25	-0.0374803	0.0428595	-0.0136959	-0.0242539	-0.0506162	-0.058249	0.129407	0.0463122	0.0572636	-0.0925765	-0.0265105	0.0517514	0.000968913	0.110466
8.5	-0.019783	0.025105	-0.0623654	-0.0135041	-0.0683026	-0.0206182	0.13364	0.0431995	0.0271318	-0.0278929	-0.028055	0.0599484	-0.0144967	0.135088
8.75	0.0117338	0.011992	-0.125078	0.00343709	-0.0322515	0.00317707	0.115707	0.00227882	-0.00568748	-0.0161672	-0.0138442	0.0443798	-0.0677001	0.155848
9	0.0260423	0.0215694	-0.161032	0.0135638	0.038481	-0.0206209	0.0857877	0.00397317	-0.0353429	-0.0476153	-0.00604114	0.0250382	-0.14299	0.110676
9.25	0.0108857	0.0417304	-0.137675	-0.013327	0.115731	-0.0329652	0.0793641	0.0739095	-0.0607334	-0.0726389	0.0166822	-0.0341281	-0.196193	0.0137942
9.5	-0.0236015	0.0387653	-0.108713	-0.0397933	0.139269	0.00138431	0.0891698	0.15215	-0.0807279	-0.0836133	0.0350096	-0.0962985	-0.177419	-0.0657845
9.75	-0.0548559	0.0142632	-0.0715363	-0.0266923	0.0920928	0.0850686	0.110226	0.169062	-0.0778237	-0.0622239	0.0442696	-0.0867325	-0.0930945	-0.0901967
10	-0.0650062	-0.00405389	-0.0495993	0.0398761	0.0254458	0.166313	0.0847822	0.174248	-0.0610223	-0.0130676	0.042755	-0.05961	-0.014492	-0.0865343
10.25	-0.0695544	-0.0282848	-0.0556512	0.10711	0.00628155	0.14471	0.00665725	0.181163	-0.00063139	0.0170668	0.0646807	-0.127709	-0.0365784	-0.114609
10.5	-0.0929919	-0.0538348	-0.0824485	0.116099	0.0239465	0.0135161	-0.0518893	0.161041	0.0563184	0.042528	0.0896274	-0.21019	-0.10875	-0.152672
10.75	-0.1339	-0.0879739	-0.153233	0.0687714	0.0048536	-0.0989458	-0.0359456	0.0686144	0.0510206	0.0748463	0.0879358	-0.212105	-0.120908	-0.16977
11	-0.122762	-0.0957511	-0.209958	0.0510176	-0.0606907	-0.0937763	0.0711289	-0.00273513	0.0141018	0.0868569	0.081132	-0.134486	-0.0489264	-0.173427
11.25	-0.0885736	-0.0826873	-0.178463	0.0484734	-0.128301	0.0242657	0.156839	-0.021139	0.00763984	0.0533394	0.0695573	-0.0324047	0.0166249	-0.173427
11.5	-0.0580466	-0.0478786	-0.105365	-0.0108933	-0.163018	0.135859	0.177947	-0.0182282	0.0270196	0.012174	0.0621836	0.067745	0.00428162	-0.152672
11.75	-0.0248977	0.012546	-0.0634195	-0.0584158	-0.171664	0.0941425	0.0950483	-0.00792422	0.0272356	-0.0117554	0.0627114	0.114343	-0.0522391	-0.0938538
12	0.0128522	0.0761066	-0.0520357	-0.0240833	-0.146846	-0.0114742	0.00441695	0.0124844	-0.000539799	-0.0514125	0.0667564	0.0829785	-0.0334655	-0.031373
12.25	0.0479796	0.14556	-0.0476762	0.0571942	-0.0699888	-0.0417176	-0.0585673	0.0329939	-0.0474874	-0.0778077	0.0721507	-0.00290622	0.0453273	0.0101371
12.5	0.0525402	0.178524	-0.0600036	0.114477	0.0268955	0.0013897	-0.10711	0.0413992	-0.107434	-0.0560233	0.0723919	-0.0843459	0.0387113	0.0445382
12.75	0.00539087	0.127367	-0.0974595	0.138783	0.0837767	0.0173088	-0.155317	0.0227909	-0.146374	-0.0192102	0.0633716	-0.109831	-0.0179998	0.076275
13	-0.0527608	0.0461432	-0.0972127	0.150436	0.0815134	0.0115135	-0.159096	-0.0350386	-0.142382	0.0162532	0.0462465	-0.094926	0.0042722	0.0518576
13.25	-0.0772361	0.0206942	-0.0377592	0.17221	0.0691975	0.0533367	-0.101301	-0.0964688	-0.0877864	0.0336808	0.0260376	-0.0797596	0.0674137	0.00647475
13.5	-0.0396273	0.0374344	0.0213731	0.180341	0.0736532	0.0927576	-0.0578109	-0.106672	-0.00214454	0.0484525	0.00403218	-0.0822186	0.0353986	0.0174513
13.75	-0.00759249	0.0355257	0.0290919	0.146736	0.0430461	0.0781117	-0.0866405	-0.0537503	0.055579	0.0574751	0.046358	-0.075251	0.000773825	0.0726127
14	-0.0238581	-0.00869299	0.0107284	0.0840081	0.00467736	0.0495467	-0.142827	-0.0132142	0.0319099	0.0395459	0.114563	-0.0575586	0.0453226	0.107019
14.25	-0.0657194	-0.0571433	-0.00843161	0.0215414	0.0219423	0.0425898	-0.176044	-0.0164278	-0.0471593	0.00659093	0.124235	-0.068211	0.0828793	0.09703
14.5	-0.0687718	-0.0635369	-0.0271911	-0.00701832	0.0929277	0.0192024	-0.181783	-0.0488424	-0.0851457	-0.0189936	0.0452481	-0.0949966	0.0508595	0.0481953
14.75	-0.0411909	-0.00928027	-0.0322393	0.000601396	0.142668	-0.0347526	-0.172798	-0.0675515	-0.0317737	0.00142058	-0.0404338	-0.0716385	0.0230506	0.0345492
15	0.00899104	0.0621696	-0.0330719	-0.00519649	0.120632	-0.0759581	-0.0981966	-0.0621555	0.0359018	0.0633402	-0.0417947	0.0061887	-0.00456803	0.0555148

## Sheet: Figure 4AB Units
Figure 4A		Group
		Vehicle	mGluR PAM
	Up	6	11
	Down	8	5
	Nonresponder	12	18
Figure 4B		Group
		Vehicle	Treatment
	Up	6	4
	Down	8	10
	Nonresponder	13	11

## Sheet: Figure 4Di
Frequency (Hz)	Vehicle
3.41797	4.38608e-05	3.8191e-05	5.06633e-05	3.64063e-05	3.6107e-05	4.48678e-05	6.11704e-05	0.000182	7.99669e-05	5.74165e-05	5.08564e-05	4.40452e-05	3.07726e-05	8.7544e-05	0.000148	0.000381		5.12113e-05	5.05468e-05	5.17763e-05	4.43722e-05	4.40482e-05	4.42921e-05	5.9199e-05	0.000161	6.10721e-05	5.29517e-05	5.05935e-05	5.59863e-05	0.000175	0.000171	0.00025	0.000359		3.23092e-05	2.04665e-05	1.98774e-05	1.96814e-05	1.98812e-05	1.98825e-05		2.05283e-05	2.44692e-05	2.15947e-05	2.14141e-05	2.07756e-05	2.03114e-05	2.17942e-05	2.10388e-05
3.90625	5.6447e-05	4.95881e-05	6.64623e-05	4.74199e-05	4.709e-05	5.77716e-05	7.89766e-05	0.000232	0.000101	7.37448e-05	6.50559e-05	5.66362e-05	3.94898e-05	0.000112	0.000188	0.000487		6.47782e-05	6.48496e-05	6.54439e-05	5.77666e-05	5.73867e-05	5.76487e-05	7.53075e-05	0.000205	7.6296e-05	6.71184e-05	6.42257e-05	7.08154e-05	0.000222	0.000224	0.000324	0.000463		4.34389e-05	2.95904e-05	2.91077e-05	2.88354e-05	2.8953e-05	2.89158e-05		2.98543e-05	3.38611e-05	3.09912e-05	3.09334e-05	3.01256e-05	2.94984e-05	3.14375e-05	3.03867e-05
4.39453	6.22601e-05	5.62017e-05	7.47724e-05	5.40188e-05	5.37169e-05	6.49842e-05	8.77538e-05	0.000257	0.000111	8.30792e-05	7.34818e-05	6.25438e-05	4.41231e-05	0.000124	0.000205	0.00053		7.12082e-05	7.33698e-05	7.18465e-05	6.65199e-05	6.61277e-05	6.63202e-05	8.5364e-05	0.000229	8.40424e-05	7.4677e-05	7.20674e-05	7.76736e-05	0.000246	0.000252	0.000365	0.000522		5.18389e-05	3.70149e-05	3.69311e-05	3.66168e-05	3.66735e-05	3.66329e-05		3.78109e-05	4.18713e-05	3.90218e-05	3.89564e-05	3.76665e-05	3.73453e-05	3.9088e-05	3.79741e-05
4.88281	6.23383e-05	5.80342e-05	7.58906e-05	5.61492e-05	5.59205e-05	6.71665e-05	8.89523e-05	0.000251	0.000109	8.40119e-05	7.44698e-05	6.25871e-05	4.53856e-05	0.000124	0.000205	0.000529		7.22214e-05	7.71167e-05	7.25608e-05	7.08068e-05	7.04753e-05	7.06757e-05	8.75726e-05	0.000231	8.40972e-05	7.62164e-05	7.43153e-05	7.92122e-05	0.000251	0.00026	0.000377	0.000543		5.82942e-05	4.40014e-05	4.42552e-05	4.38972e-05	4.39703e-05	4.39991e-05		4.53302e-05	5.00782e-05	4.68345e-05	4.66964e-05	4.53164e-05	4.4799e-05	4.65767e-05	4.55043e-05
5.37109	6.09529e-05	5.96455e-05	7.58524e-05	5.79122e-05	5.76924e-05	6.85223e-05	8.72557e-05	0.000234	0.000107	8.39896e-05	7.45946e-05	6.12724e-05	4.61575e-05	0.000117	0.000192	0.000494		7.26077e-05	7.90003e-05	7.28537e-05	7.59586e-05	7.56257e-05	7.5713e-05	8.84851e-05	0.000221	8.23122e-05	7.64815e-05	7.42047e-05	7.87038e-05	0.000245	0.000256	0.000365	0.000522		6.38287e-05	5.22434e-05	5.26725e-05	5.22698e-05	5.17683e-05	5.18794e-05		5.33644e-05	5.70599e-05	5.50746e-05	5.51636e-05	5.31665e-05	5.27055e-05	5.538e-05	5.40983e-05
5.85938	5.67382e-05	6.11132e-05	7.35276e-05	5.99286e-05	5.97021e-05	6.96779e-05	8.36617e-05	0.000213	9.99776e-05	8.09103e-05	7.27887e-05	5.69892e-05	4.74028e-05	0.000108	0.000177	0.000454		7.38949e-05	8.34116e-05	7.39441e-05	8.25773e-05	8.21573e-05	8.21135e-05	8.97681e-05	0.000208	8.09289e-05	7.68614e-05	7.5504e-05	7.92863e-05	0.00023	0.000245	0.000346	0.000491		7.03496e-05	6.00346e-05	6.02832e-05	5.98508e-05	5.95303e-05	5.97078e-05		6.13431e-05	6.52599e-05	6.3165e-05	6.31906e-05	6.10489e-05	6.06292e-05	6.37824e-05	6.25765e-05
6.34766	5.52013e-05	6.51642e-05	7.41227e-05	6.37276e-05	6.3454e-05	7.27445e-05	8.31081e-05	0.000196	9.5022e-05	7.86567e-05	7.1978e-05	5.53288e-05	4.88816e-05	0.000101	0.000169	0.000425		7.48486e-05	8.73392e-05	7.46997e-05	9.01154e-05	8.97242e-05	8.97649e-05	9.24988e-05	0.000195	8.12261e-05	7.93161e-05	7.84808e-05	8.15358e-05	0.000221	0.000236	0.000329	0.00046		8.1499e-05	7.16749e-05	7.14809e-05	7.10429e-05	7.06005e-05	7.08067e-05		7.26923e-05	7.69837e-05	7.49554e-05	7.53016e-05	7.24973e-05	7.18978e-05	7.60674e-05	7.47345e-05
6.83594	5.64157e-05	7.24008e-05	7.83301e-05	7.09823e-05	7.06328e-05	7.99252e-05	8.71217e-05	0.00019	9.52606e-05	8.04314e-05	7.48352e-05	5.64745e-05	4.93254e-05	0.000101	0.000167	0.000403		8.05328e-05	9.64478e-05	7.98613e-05	0.000102	0.000101	0.000102	9.84807e-05	0.000186	8.50597e-05	8.5234e-05	8.5493e-05	8.6577e-05	0.000216	0.000234	0.000319	0.000424		9.40133e-05	8.56574e-05	8.54004e-05	8.48754e-05	8.40985e-05	8.4288e-05		8.64824e-05	9.0682e-05	8.98936e-05	9.078e-05	8.66439e-05	8.55744e-05	9.16444e-05	8.97281e-05
7.32422	5.80444e-05	8.22266e-05	8.42032e-05	8.10683e-05	8.05786e-05	8.95678e-05	9.2855e-05	0.000189	9.96957e-05	8.62459e-05	8.08688e-05	5.8177e-05	5.3187e-05	0.000103	0.00017	0.000382		9.18611e-05	0.000112	9.07056e-05	0.000118	0.000118	0.000118	0.000109	0.000184	9.59339e-05	9.65584e-05	9.80309e-05	9.61912e-05	0.000216	0.000234	0.000314	0.000407		0.000108	9.87104e-05	9.83577e-05	9.77913e-05	9.78028e-05	9.79486e-05		0.0001	0.000103	0.000104	0.000105	0.0001	9.94612e-05	0.000107	0.000104
7.8125	6.48974e-05	9.75176e-05	9.69282e-05	9.64318e-05	9.57913e-05	0.000106	0.000106	0.000203	0.00011	9.77088e-05	9.31501e-05	6.50477e-05	5.80293e-05	0.000113	0.000184	0.000371		0.000101	0.000125	0.0001	0.000134	0.000133	0.000133	0.000119	0.000183	0.000107	0.000107	0.000109	0.000105	0.000219	0.00024	0.000316	0.000396		0.000118	0.000109	0.000109	0.000109	0.000109	0.000109		0.000112	0.000115	0.000115	0.000117	0.000111	0.000111	0.00012	0.000117
8.30078	7.29152e-05	0.00011	0.000109	0.000108	0.000107	0.000118	0.000118	0.000214	0.000128	0.000113	0.000107	7.31524e-05	5.88063e-05	0.000123	0.000197	0.000369		0.000107	0.000134	0.000106	0.000143	0.000142	0.000142	0.000126	0.000182	0.000119	0.000117	0.000116	0.000111	0.000222	0.000243	0.000318	0.0004		0.000117	0.000109	0.000109	0.000108	0.000109	0.000109		0.000112	0.000114	0.000115	0.000117	0.000111	0.000111	0.000121	0.000117
8.78906	7.95899e-05	0.000114	0.000116	0.000112	0.000111	0.000121	0.000124	0.000214	0.000147	0.000125	0.000118	7.98469e-05	5.70002e-05	0.000127	0.000201	0.000361		0.000106	0.000131	0.000105	0.000141	0.00014	0.00014	0.000123	0.000175	0.000124	0.000118	0.000113	0.000109	0.000215	0.000236	0.000312	0.000393		0.000109	0.0001	0.0001	9.97278e-05	0.000101	0.000101		0.000103	0.000106	0.000106	0.000108	0.000102	0.000102	0.000112	0.00011
9.27734	8.33875e-05	0.000109	0.000117	0.000106	0.000105	0.000114	0.000124	0.000202	0.000159	0.000128	0.000119	8.34054e-05	5.22638e-05	0.000124	0.000191	0.000344		9.40232e-05	0.000114	9.41406e-05	0.000126	0.000125	0.000125	0.00011	0.000156	0.000121	0.000111	0.0001	9.89012e-05	0.000194	0.000217	0.000284	0.000364		9.23734e-05	8.31216e-05	8.29e-05	8.25701e-05	8.37546e-05	8.39055e-05		8.58337e-05	8.86826e-05	8.79664e-05	8.99101e-05	8.48834e-05	8.51849e-05	9.39804e-05	9.184e-05
9.76562	8.27961e-05	9.48252e-05	0.000109	9.07688e-05	9.01135e-05	9.8056e-05	0.000115	0.000178	0.000165	0.000123	0.000112	8.27693e-05	4.55645e-05	0.000112	0.000169	0.000312		7.95918e-05	9.4513e-05	7.96134e-05	0.000101	0.0001	0.0001	8.92696e-05	0.000132	0.000108	9.64486e-05	8.36455e-05	8.42821e-05	0.000166	0.000187	0.000247	0.000325		7.25259e-05	6.3316e-05	6.34241e-05	6.31722e-05	6.38733e-05	6.40154e-05		6.54973e-05	6.91952e-05	6.7624e-05	6.91019e-05	6.51261e-05	6.49805e-05	7.23585e-05	7.07246e-05
10.2539	7.60867e-05	7.49401e-05	9.4331e-05	7.05483e-05	7.00207e-05	7.6034e-05	9.86754e-05	0.000145	0.000155	0.000108	9.58399e-05	7.60202e-05	3.72338e-05	9.25241e-05	0.000138	0.000263		6.46061e-05	7.4562e-05	6.44231e-05	7.57955e-05	7.53734e-05	7.50888e-05	6.77736e-05	0.000108	9.16263e-05	7.95278e-05	6.58836e-05	6.81171e-05	0.000134	0.000153	0.000203	0.00027		5.59245e-05	4.70933e-05	4.69535e-05	4.68152e-05	4.76065e-05	4.77132e-05		4.87972e-05	5.2552e-05	5.05098e-05	5.13486e-05	4.8342e-05	4.84837e-05	5.34841e-05	5.23396e-05
10.7422	6.64865e-05	5.79305e-05	7.89469e-05	5.33799e-05	5.29293e-05	5.78447e-05	8.18883e-05	0.000116	0.000136	9.00898e-05	7.85129e-05	6.63986e-05	3.02756e-05	7.29382e-05	0.000109	0.000223		5.22691e-05	5.94623e-05	5.20085e-05	5.77021e-05	5.74261e-05	5.71075e-05	5.21202e-05	8.85301e-05	7.70074e-05	6.6121e-05	5.26301e-05	5.54192e-05	0.000112	0.000128	0.000172	0.000228		4.36482e-05	3.526e-05	3.51824e-05	3.50879e-05	3.57007e-05	3.57671e-05		3.65726e-05	4.073e-05	3.83243e-05	3.86796e-05	3.66396e-05	3.63696e-05	3.97788e-05	3.87285e-05
11.2305	5.66672e-05	4.58783e-05	6.55397e-05	4.19923e-05	4.16068e-05	4.5478e-05	6.76662e-05	9.61719e-05	0.000117	7.5042e-05	6.46077e-05	5.6671e-05	2.83127e-05	5.88942e-05	8.81128e-05	0.000191		4.29511e-05	4.93111e-05	4.25491e-05	4.60754e-05	4.58933e-05	4.55668e-05	4.2652e-05	7.57608e-05	6.51729e-05	5.64981e-05	4.44418e-05	4.57262e-05	9.67601e-05	0.000111	0.000151	0.000196		3.72071e-05	2.90786e-05	2.91674e-05	2.90779e-05	2.94197e-05	2.94531e-05		3.01238e-05	3.39822e-05	3.13758e-05	3.13936e-05	3.02343e-05	2.99949e-05	3.20483e-05	3.11522e-05
11.7188	4.60496e-05	3.65264e-05	5.2788e-05	3.34666e-05	3.31238e-05	3.61711e-05	5.4767e-05	7.83257e-05	9.56456e-05	6.10242e-05	5.23267e-05	4.60923e-05	2.48138e-05	4.77364e-05	7.22972e-05	0.000164		3.66909e-05	4.35883e-05	3.61813e-05	3.8952e-05	3.88981e-05	3.85986e-05	3.72179e-05	6.76466e-05	5.62482e-05	5.04526e-05	3.9192e-05	3.92874e-05	8.63476e-05	9.9412e-05	0.000139	0.000178		3.26503e-05	2.52136e-05	2.52744e-05	2.52071e-05	2.56944e-05	2.572e-05		2.62936e-05	2.94896e-05	2.70901e-05	2.70868e-05	2.64312e-05	2.61892e-05	2.73265e-05	2.67799e-05
12.207	3.87411e-05	3.06416e-05	4.41566e-05	2.82798e-05	2.79752e-05	3.06593e-05	4.59251e-05	6.77757e-05	7.98117e-05	5.12558e-05	4.4059e-05	3.8737e-05	2.2256e-05	4.00559e-05	6.16491e-05	0.000149		3.34551e-05	4.00861e-05	3.30062e-05	3.49702e-05	3.49604e-05	3.47229e-05	3.44911e-05	6.29155e-05	5.156e-05	4.68371e-05	3.64179e-05	3.59202e-05	8.07184e-05	9.28141e-05	0.000131	0.000168		3.04886e-05	2.32662e-05	2.32142e-05	2.316e-05	2.38139e-05	2.38556e-05		2.43954e-05	2.71373e-05	2.50039e-05	2.50107e-05	2.48974e-05	2.42584e-05	2.51987e-05	2.4565e-05
12.6953	3.3366e-05	2.61502e-05	3.76369e-05	2.45018e-05	2.42468e-05	2.64602e-05	3.93981e-05	6.17665e-05	6.99153e-05	4.47796e-05	3.84465e-05	3.34372e-05	2.25782e-05	3.54124e-05	5.44663e-05	0.000134		3.08677e-05	3.68818e-05	3.0449e-05	3.10787e-05	3.11165e-05	3.09959e-05	3.18594e-05	5.85012e-05	4.85263e-05	4.49575e-05	3.49593e-05	3.32929e-05	7.70189e-05	8.82368e-05	0.000125	0.000162		2.85303e-05	2.15335e-05	2.14445e-05	2.13733e-05	2.23073e-05	2.23436e-05		2.28737e-05	2.46927e-05	2.29409e-05	2.30209e-05	2.3293e-05	2.27538e-05	2.3493e-05	2.30239e-05
13.1836	2.97071e-05	2.31711e-05	3.34408e-05	2.18107e-05	2.15814e-05	2.34693e-05	3.49981e-05	5.67014e-05	6.15874e-05	3.97589e-05	3.42903e-05	2.9722e-05	2.12734e-05	3.18257e-05	4.98091e-05	0.000124		2.99517e-05	3.64677e-05	2.9586e-05	2.92259e-05	2.92964e-05	2.92747e-05	3.06142e-05	5.60636e-05	4.61369e-05	4.27379e-05	3.439e-05	3.26214e-05	7.42775e-05	8.43124e-05	0.000117	0.000153		2.66214e-05	1.97903e-05	1.97233e-05	1.96756e-05	2.07434e-05	2.07934e-05		2.12912e-05	2.25475e-05	2.11803e-05	2.1321e-05	2.15539e-05	2.11619e-05	2.17336e-05	2.1224e-05
13.6719	2.72411e-05	2.09979e-05	3.04043e-05	1.97417e-05	1.95319e-05	2.0931e-05	3.16627e-05	5.28888e-05	5.68622e-05	3.6746e-05	3.14425e-05	2.72537e-05	1.77008e-05	2.92153e-05	4.57802e-05	0.000116		2.96842e-05	3.58583e-05	2.93682e-05	2.76006e-05	2.77274e-05	2.77593e-05	2.91744e-05	5.39024e-05	4.57813e-05	4.1766e-05	3.41871e-05	3.26114e-05	7.14189e-05	8.076e-05	0.000109	0.000143		2.53468e-05	1.85001e-05	1.84027e-05	1.83613e-05	1.9343e-05	1.93843e-05		1.98683e-05	2.10756e-05	1.95934e-05	1.95785e-05	1.98864e-05	1.97094e-05	2.02218e-05	1.97825e-05
14.1602	2.48772e-05	1.92123e-05	2.78759e-05	1.82968e-05	1.81077e-05	1.9061e-05	2.88605e-05	4.97172e-05	5.23658e-05	3.39279e-05	2.90209e-05	2.48978e-05	1.65106e-05	2.66917e-05	4.20722e-05	0.000114		2.86565e-05	3.41192e-05	2.83864e-05	2.60095e-05	2.61594e-05	2.62674e-05	2.72052e-05	5.14259e-05	4.33365e-05	4.00272e-05	3.31474e-05	3.14046e-05	6.60063e-05	7.65161e-05	0.000103	0.000135		2.36998e-05	1.71622e-05	1.73079e-05	1.73086e-05	1.7757e-05	1.78134e-05		1.82462e-05	1.91959e-05	1.78951e-05	1.76478e-05	1.79143e-05	1.80874e-05	1.84674e-05	1.83751e-05
14.6484	2.29771e-05	1.76735e-05	2.59535e-05	1.69345e-05	1.67683e-05	1.75802e-05	2.67736e-05	4.59004e-05	4.88598e-05	3.17026e-05	2.7259e-05	2.29866e-05	1.47838e-05	2.49882e-05	3.92831e-05	0.000107		2.80779e-05	3.3243e-05	2.78037e-05	2.46417e-05	2.48034e-05	2.49994e-05	2.56171e-05	4.87605e-05	4.18254e-05	3.82599e-05	3.23055e-05	3.0683e-05	6.37342e-05	7.41849e-05	9.89948e-05	0.000126		2.23832e-05	1.57595e-05	1.5986e-05	1.60312e-05	1.6292e-05	1.63557e-05		1.6722e-05	1.77566e-05	1.63621e-05	1.60845e-05	1.61432e-05	1.66377e-05	1.70621e-05	1.73589e-05
15.1367	2.21175e-05	1.69756e-05	2.5146e-05	1.62603e-05	1.61117e-05	1.67607e-05	2.58629e-05	4.15993e-05	4.69642e-05	3.05548e-05	2.58367e-05	2.21417e-05	1.37447e-05	2.37391e-05	3.6638e-05	9.93965e-05		2.70948e-05	3.24468e-05	2.68043e-05	2.35289e-05	2.37063e-05	2.39224e-05	2.41192e-05	4.60044e-05	3.88173e-05	3.57655e-05	3.10597e-05	2.91804e-05	5.88314e-05	6.99533e-05	9.4522e-05	0.000119		2.24567e-05	1.52251e-05	1.53166e-05	1.53774e-05	1.5372e-05	1.54193e-05		1.5747e-05	1.70398e-05	1.5433e-05	1.51872e-05	1.51212e-05	1.56891e-05	1.61909e-05	1.67669e-05
15.625	2.14612e-05	1.61054e-05	2.43971e-05	1.53459e-05	1.52574e-05	1.59707e-05	2.51216e-05	3.8339e-05	4.6281e-05	2.94306e-05	2.47523e-05	2.14809e-05	1.33119e-05	2.24974e-05	3.4393e-05	9.23485e-05		2.52008e-05	3.02115e-05	2.49787e-05	2.22561e-05	2.2427e-05	2.26685e-05	2.28078e-05	4.28708e-05	3.57375e-05	3.3822e-05	2.85795e-05	2.67372e-05	5.50807e-05	6.56898e-05	9.11875e-05	0.000119		2.23246e-05	1.48743e-05	1.4867e-05	1.49162e-05	1.47772e-05	1.48507e-05		1.51294e-05	1.61975e-05	1.47045e-05	1.46554e-05	1.47057e-05	1.51255e-05	1.55863e-05	1.62305e-05
16.1133	2.10726e-05	1.55617e-05	2.39734e-05	1.46763e-05	1.46226e-05	1.5263e-05	2.45424e-05	3.69884e-05	4.61338e-05	2.85026e-05	2.37961e-05	2.10634e-05	1.33019e-05	2.11752e-05	3.21813e-05	8.46617e-05		2.38037e-05	2.86319e-05	2.3554e-05	2.15189e-05	2.16944e-05	2.1918e-05	2.21469e-05	4.02316e-05	3.48941e-05	3.24611e-05	2.63929e-05	2.49493e-05	5.32449e-05	6.21469e-05	8.72349e-05	0.000113		2.23661e-05	1.45005e-05	1.4414e-05	1.44257e-05	1.44343e-05	1.45334e-05		1.47898e-05	1.55372e-05	1.39367e-05	1.40562e-05	1.41266e-05	1.48141e-05	1.50602e-05	1.56617e-05
16.6016	2.09545e-05	1.51291e-05	2.35731e-05	1.40141e-05	1.3984e-05	1.46206e-05	2.41766e-05	3.53659e-05	4.6591e-05	2.8147e-05	2.31829e-05	2.09374e-05	1.28946e-05	2.03613e-05	3.12862e-05	7.96541e-05		2.24835e-05	2.72464e-05	2.21632e-05	2.05447e-05	2.07528e-05	2.09587e-05	2.11277e-05	3.73267e-05	3.42374e-05	3.1321e-05	2.49856e-05	2.33506e-05	5.05336e-05	5.95607e-05	8.33714e-05	0.000109		2.24598e-05	1.42052e-05	1.38874e-05	1.38502e-05	1.39082e-05	1.40233e-05		1.42635e-05	1.52392e-05	1.35136e-05	1.36691e-05	1.36667e-05	1.42873e-05	1.42542e-05	1.46839e-05
17.0898	2.08613e-05	1.46973e-05	2.31559e-05	1.35001e-05	1.3495e-05	1.42351e-05	2.38382e-05	3.56261e-05	4.73068e-05	2.78678e-05	2.28182e-05	2.08509e-05	1.27955e-05	2.01749e-05	3.07221e-05	7.90974e-05		2.19445e-05	2.59648e-05	2.17421e-05	2.01369e-05	2.0379e-05	2.05684e-05	2.08241e-05	3.70609e-05	3.52293e-05	3.18033e-05	2.37034e-05	2.30959e-05	5.02788e-05	5.86712e-05	8.00035e-05	0.000104		2.26785e-05	1.39815e-05	1.36659e-05	1.35925e-05	1.40102e-05	1.41294e-05		1.43715e-05	1.49321e-05	1.32303e-05	1.34517e-05	1.34742e-05	1.43613e-05	1.40391e-05	1.45032e-05
17.5781	2.13921e-05	1.4474e-05	2.35353e-05	1.33091e-05	1.32879e-05	1.4035e-05	2.43223e-05	3.64415e-05	4.91996e-05	2.82873e-05	2.3386e-05	2.14082e-05	1.22479e-05	2.03445e-05	3.07844e-05	7.61222e-05		2.13622e-05	2.46081e-05	2.11465e-05	1.95222e-05	1.97774e-05	1.99418e-05	1.98808e-05	3.58432e-05	3.65223e-05	3.19779e-05	2.24088e-05	2.25333e-05	5.00062e-05	5.64985e-05	7.64094e-05	9.82444e-05		2.42896e-05	1.39454e-05	1.36319e-05	1.35531e-05	1.40329e-05	1.4138e-05		1.44113e-05	1.45248e-05	1.29473e-05	1.31681e-05	1.3114e-05	1.44011e-05	1.37026e-05	1.40899e-05
18.0664	2.15658e-05	1.42046e-05	2.35196e-05	1.30598e-05	1.30161e-05	1.38468e-05	2.43325e-05	3.55482e-05	5.03325e-05	2.86876e-05	2.34433e-05	2.15581e-05	1.21909e-05	2.05891e-05	3.07759e-05	7.37791e-05		2.11878e-05	2.30567e-05	2.09303e-05	1.93261e-05	1.96028e-05	1.9662e-05	1.96168e-05	3.489e-05	3.74761e-05	3.19416e-05	2.12589e-05	2.22519e-05	4.75076e-05	5.44745e-05	7.3626e-05	9.35738e-05		2.67917e-05	1.38274e-05	1.34383e-05	1.33769e-05	1.42258e-05	1.42974e-05		1.45783e-05	1.45213e-05	1.2729e-05	1.2944e-05	1.29444e-05	1.46007e-05	1.37226e-05	1.41848e-05
18.5547	2.24148e-05	1.43777e-05	2.42759e-05	1.31566e-05	1.31209e-05	1.39906e-05	2.51449e-05	3.462e-05	5.17648e-05	2.9058e-05	2.37527e-05	2.24058e-05	1.11439e-05	2.08848e-05	3.07468e-05	6.96905e-05		2.10132e-05	2.1987e-05	2.08351e-05	1.8888e-05	1.91373e-05	1.91739e-05	1.87308e-05	3.36754e-05	3.76206e-05	3.13724e-05	2.07207e-05	2.20592e-05	4.54247e-05	5.20805e-05	7.0515e-05	8.86236e-05		2.65835e-05	1.34479e-05	1.32634e-05	1.32288e-05	1.41718e-05	1.42273e-05		1.44902e-05	1.40773e-05	1.22596e-05	1.25082e-05	1.26621e-05	1.45491e-05	1.31991e-05	1.36926e-05
19.043	2.29835e-05	1.43663e-05	2.47545e-05	1.30175e-05	1.29798e-05	1.38068e-05	2.55602e-05	3.24966e-05	5.28378e-05	2.92279e-05	2.3725e-05	2.29728e-05	1.07658e-05	2.03485e-05	3.01629e-05	6.65783e-05		2.01489e-05	2.03666e-05	1.99097e-05	1.85531e-05	1.87285e-05	1.87719e-05	1.789e-05	3.17401e-05	3.74649e-05	3.03303e-05	1.92863e-05	2.10185e-05	4.22404e-05	4.92635e-05	6.78524e-05	8.44955e-05		2.83135e-05	1.3392e-05	1.31637e-05	1.31702e-05	1.38102e-05	1.38746e-05		1.41286e-05	1.35603e-05	1.17783e-05	1.19805e-05	1.21618e-05	1.41708e-05	1.26362e-05	1.30741e-05
19.5312	2.3121e-05	1.4268e-05	2.48411e-05	1.28415e-05	1.28217e-05	1.35629e-05	2.5451e-05	2.9702e-05	5.28643e-05	2.89871e-05	2.31271e-05	2.30754e-05	1.05266e-05	1.93045e-05	2.88175e-05	6.35338e-05		1.98621e-05	1.92892e-05	1.97042e-05	1.80494e-05	1.81793e-05	1.82243e-05	1.7151e-05	2.96754e-05	3.71184e-05	2.96683e-05	1.85149e-05	2.07272e-05	3.91746e-05	4.58795e-05	6.53307e-05	7.8425e-05		2.77973e-05	1.27855e-05	1.25922e-05	1.26179e-05	1.28279e-05	1.28872e-05		1.3121e-05	1.31445e-05	1.12705e-05	1.13757e-05	1.14489e-05	1.31514e-05	1.18799e-05	1.23486e-05
20.0195	2.27445e-05	1.41899e-05	2.4498e-05	1.25527e-05	1.25378e-05	1.32374e-05	2.48766e-05	2.78169e-05	5.19049e-05	2.81051e-05	2.22828e-05	2.26783e-05	9.37659e-06	1.80041e-05	2.68965e-05	6.02145e-05		1.92066e-05	1.8106e-05	1.9099e-05	1.68833e-05	1.69209e-05	1.70138e-05	1.57559e-05	2.73901e-05	3.58486e-05	2.82902e-05	1.77189e-05	2.00671e-05	3.62961e-05	4.3341e-05	6.17416e-05	7.41006e-05		2.76077e-05	1.24778e-05	1.22075e-05	1.22367e-05	1.19119e-05	1.19388e-05		1.21679e-05	1.32703e-05	1.09871e-05	1.10451e-05	1.11508e-05	1.21463e-05	1.1452e-05	1.18256e-05
20.5078	2.2455e-05	1.40399e-05	2.42093e-05	1.23652e-05	1.23384e-05	1.29964e-05	2.4455e-05	2.63145e-05	5.10203e-05	2.76678e-05	2.17348e-05	2.24724e-05	8.96993e-06	1.6882e-05	2.54501e-05	5.77875e-05		1.84208e-05	1.72855e-05	1.8288e-05	1.63432e-05	1.63672e-05	1.64782e-05	1.47454e-05	2.60072e-05	3.47185e-05	2.72787e-05	1.66546e-05	1.93185e-05	3.33323e-05	4.03237e-05	5.7919e-05	6.98512e-05		2.98473e-05	1.23471e-05	1.17274e-05	1.17501e-05	1.11175e-05	1.11145e-05		1.13383e-05	1.31697e-05	1.06142e-05	1.06435e-05	1.06523e-05	1.12755e-05	1.1049e-05	1.13046e-05
20.9961	2.18121e-05	1.36943e-05	2.36407e-05	1.20193e-05	1.19732e-05	1.26717e-05	2.37695e-05	2.48921e-05	4.89439e-05	2.68389e-05	2.11415e-05	2.18249e-05	9.06604e-06	1.5823e-05	2.38805e-05	5.38656e-05		1.77786e-05	1.6469e-05	1.76602e-05	1.52928e-05	1.5359e-05	1.54202e-05	1.37774e-05	2.41449e-05	3.34233e-05	2.64866e-05	1.63106e-05	1.87186e-05	3.09084e-05	3.79522e-05	5.43935e-05	6.43073e-05		2.94077e-05	1.17657e-05	1.10821e-05	1.10941e-05	1.03608e-05	1.03248e-05		1.05471e-05	1.32429e-05	1.03094e-05	1.01759e-05	1.01337e-05	1.05e-05	1.0498e-05	1.06468e-05
21.4844	2.14459e-05	1.39235e-05	2.33807e-05	1.22632e-05	1.22051e-05	1.30576e-05	2.33623e-05	2.45148e-05	4.64336e-05	2.58128e-05	2.05413e-05	2.14496e-05	9.03989e-06	1.52104e-05	2.23594e-05	5.08133e-05		1.67291e-05	1.59583e-05	1.64645e-05	1.44803e-05	1.45281e-05	1.45511e-05	1.31923e-05	2.29047e-05	3.08896e-05	2.44591e-05	1.56763e-05	1.7885e-05	2.89677e-05	3.68365e-05	5.11258e-05	6.18839e-05		2.67639e-05	1.11579e-05	1.06118e-05	1.061e-05	9.92315e-06	9.87487e-06		1.00844e-05	1.33459e-05	1.01876e-05	9.99232e-06	9.97131e-06	1.00477e-05	1.01856e-05	1.01696e-05
21.9727	2.08154e-05	1.39458e-05	2.28582e-05	1.23032e-05	1.22401e-05	1.32686e-05	2.27801e-05	2.34894e-05	4.34301e-05	2.45615e-05	1.96412e-05	2.08116e-05	9.31476e-06	1.45262e-05	2.14208e-05	4.83988e-05		1.58798e-05	1.53296e-05	1.56007e-05	1.39109e-05	1.3948e-05	1.39608e-05	1.27792e-05	2.19329e-05	2.88979e-05	2.30925e-05	1.52213e-05	1.71589e-05	2.68062e-05	3.55401e-05	4.96224e-05	5.89881e-05		2.27589e-05	1.04782e-05	1.01712e-05	1.0166e-05	9.58727e-06	9.55959e-06		9.74578e-06	1.30551e-05	9.93419e-06	9.69751e-06	9.62366e-06	9.75181e-06	9.79922e-06	9.80518e-06
22.4609	1.97841e-05	1.36296e-05	2.19228e-05	1.20936e-05	1.20475e-05	1.31302e-05	2.18202e-05	2.24344e-05	4.01013e-05	2.28993e-05	1.85519e-05	1.97622e-05	9.6323e-06	1.38089e-05	2.05459e-05	4.6132e-05		1.51559e-05	1.47905e-05	1.48885e-05	1.32959e-05	1.33286e-05	1.33391e-05	1.24927e-05	2.04123e-05	2.63626e-05	2.16634e-05	1.48153e-05	1.63645e-05	2.54703e-05	3.45781e-05	4.7995e-05	5.67505e-05		1.85051e-05	9.93174e-06	1.00031e-05	9.99085e-06	9.54328e-06	9.52511e-06		9.70414e-06	1.31565e-05	1.00746e-05	9.76489e-06	9.6854e-06	9.70331e-06	9.7783e-06	9.74218e-06
22.9492	1.88813e-05	1.33555e-05	2.09779e-05	1.19102e-05	1.18817e-05	1.29694e-05	2.07957e-05	2.13193e-05	3.69919e-05	2.11863e-05	1.74519e-05	1.88395e-05	9.29657e-06	1.31591e-05	1.96983e-05	4.44209e-05		1.44584e-05	1.41931e-05	1.42208e-05	1.30209e-05	1.30189e-05	1.30302e-05	1.22833e-05	1.90242e-05	2.47228e-05	2.03604e-05	1.44504e-05	1.57702e-05	2.40753e-05	3.37088e-05	4.71202e-05	5.50649e-05		1.59633e-05	9.71252e-06	1.00195e-05	9.99927e-06	9.48455e-06	9.47567e-06		9.65028e-06	1.28423e-05	9.90474e-06	9.63186e-06	9.65617e-06	9.64265e-06	9.63518e-06	9.5506e-06
23.4375	1.71251e-05	1.26428e-05	1.93587e-05	1.13725e-05	1.13683e-05	1.23605e-05	1.92066e-05	1.97833e-05	3.38396e-05	1.93628e-05	1.61512e-05	1.70937e-05	8.48168e-06	1.229e-05	1.90312e-05	4.12323e-05		1.40579e-05	1.40803e-05	1.38515e-05	1.30054e-05	1.2961e-05	1.29588e-05	1.225e-05	1.82781e-05	2.37209e-05	1.97212e-05	1.40375e-05	1.49678e-05	2.3392e-05	3.35896e-05	4.56953e-05	5.23645e-05		1.45884e-05	9.45176e-06	9.89354e-06	9.88441e-06	9.41947e-06	9.40122e-06		9.57919e-06	1.22422e-05	9.688e-06	9.41188e-06	9.47369e-06	9.55151e-06	9.49041e-06	9.40383e-06
23.9258	1.57765e-05	1.19486e-05	1.80919e-05	1.07714e-05	1.07733e-05	1.15701e-05	1.79582e-05	1.87005e-05	3.13408e-05	1.82424e-05	1.55408e-05	1.57453e-05	8.24143e-06	1.19202e-05	1.84387e-05	3.95403e-05		1.37953e-05	1.41114e-05	1.36062e-05	1.3092e-05	1.30521e-05	1.30282e-05	1.21969e-05	1.75674e-05	2.29117e-05	1.91376e-05	1.38308e-05	1.47033e-05	2.34594e-05	3.29732e-05	4.48222e-05	5.07782e-05		1.36908e-05	9.48838e-06	1.00041e-05	9.99578e-06	9.47823e-06	9.45865e-06		9.65564e-06	1.16718e-05	9.56896e-06	9.32929e-06	9.48308e-06	9.60897e-06	9.55892e-06	9.37669e-06
24.4141	1.41018e-05	1.13559e-05	1.65216e-05	1.02705e-05	1.02809e-05	1.08789e-05	1.63939e-05	1.81423e-05	2.8221e-05	1.6921e-05	1.45943e-05	1.4098e-05	7.98363e-06	1.15713e-05	1.77311e-05	3.81296e-05		1.34191e-05	1.40831e-05	1.32105e-05	1.31923e-05	1.31057e-05	1.30955e-05	1.21844e-05	1.72271e-05	2.21148e-05	1.8753e-05	1.39279e-05	1.42883e-05	2.3527e-05	3.22065e-05	4.33602e-05	4.98655e-05		1.272e-05	9.53735e-06	1.01222e-05	1.01187e-05	9.49699e-06	9.4929e-06		9.69633e-06	1.08687e-05	9.33932e-06	9.24097e-06	9.40232e-06	9.63951e-06	9.46195e-06	9.27083e-06
24.9023	1.33828e-05	1.1232e-05	1.59741e-05	1.01703e-05	1.01795e-05	1.06989e-05	1.58681e-05	1.77517e-05	2.6685e-05	1.65245e-05	1.41872e-05	1.34094e-05	7.99838e-06	1.13839e-05	1.74304e-05	3.61962e-05		1.29956e-05	1.41635e-05	1.2756e-05	1.33148e-05	1.32138e-05	1.31834e-05	1.22133e-05	1.71027e-05	2.14628e-05	1.82205e-05	1.3837e-05	1.38148e-05	2.41064e-05	3.13012e-05	4.28218e-05	4.90479e-05		1.23015e-05	9.81429e-06	1.04678e-05	1.04501e-05	9.79387e-06	9.78366e-06		1.00122e-05	1.04467e-05	9.42767e-06	9.45836e-06	9.58217e-06	9.9367e-06	9.7298e-06	9.50739e-06
25.3906	1.28839e-05	1.11451e-05	1.54347e-05	1.01136e-05	1.01172e-05	1.06002e-05	1.53601e-05	1.72935e-05	2.50621e-05	1.58896e-05	1.36501e-05	1.29393e-05	7.94782e-06	1.11563e-05	1.67571e-05	3.48331e-05		1.28089e-05	1.40384e-05	1.25632e-05	1.34456e-05	1.33681e-05	1.33422e-05	1.2225e-05	1.70599e-05	2.08823e-05	1.80908e-05	1.4119e-05	1.37608e-05	2.41337e-05	3.07945e-05	4.26112e-05	4.91249e-05		1.19809e-05	9.77888e-06	1.03758e-05	1.03514e-05	9.73521e-06	9.74175e-06		9.96338e-06	1.01483e-05	9.33682e-06	9.35401e-06	9.5253e-06	9.90077e-06	9.60352e-06	9.40354e-06
25.8789	1.25852e-05	1.11502e-05	1.50822e-05	1.01139e-05	1.01183e-05	1.05892e-05	1.49901e-05	1.72414e-05	2.38809e-05	1.53612e-05	1.33094e-05	1.26169e-05	7.32211e-06	1.11471e-05	1.64251e-05	3.38579e-05		1.26319e-05	1.38735e-05	1.24086e-05	1.35344e-05	1.34746e-05	1.34521e-05	1.22061e-05	1.69094e-05	2.0191e-05	1.78029e-05	1.39039e-05	1.3486e-05	2.41433e-05	3.03563e-05	4.15457e-05	4.88872e-05		1.16633e-05	9.91153e-06	1.04952e-05	1.04613e-05	9.86945e-06	9.90228e-06		1.0127e-05	1.00168e-05	9.36878e-06	9.47796e-06	9.5214e-06	1.00793e-05	9.66039e-06	9.38948e-06
26.3672	1.25021e-05	1.12827e-05	1.50182e-05	1.02259e-05	1.02354e-05	1.06714e-05	1.4976e-05	1.68422e-05	2.35713e-05	1.53191e-05	1.31576e-05	1.25506e-05	6.70444e-06	1.12129e-05	1.65482e-05	3.29287e-05		1.26067e-05	1.3915e-05	1.23797e-05	1.37033e-05	1.36459e-05	1.36301e-05	1.22617e-05	1.66905e-05	1.98409e-05	1.75622e-05	1.3884e-05	1.34465e-05	2.38842e-05	3.05847e-05	4.14849e-05	4.78811e-05		1.13731e-05	9.81428e-06	1.0395e-05	1.03589e-05	9.82692e-06	9.87648e-06		1.00847e-05	9.84793e-06	9.32026e-06	9.47712e-06	9.41027e-06	1.0053e-05	9.64976e-06	9.41081e-06
26.8555	1.2222e-05	1.12757e-05	1.48518e-05	1.02809e-05	1.02983e-05	1.06972e-05	1.48323e-05	1.65234e-05	2.27543e-05	1.49159e-05	1.2936e-05	1.23071e-05	6.32512e-06	1.12196e-05	1.62593e-05	3.20997e-05		1.27173e-05	1.39886e-05	1.25056e-05	1.40199e-05	1.3966e-05	1.39558e-05	1.25074e-05	1.65445e-05	1.97076e-05	1.80073e-05	1.42027e-05	1.37271e-05	2.3962e-05	3.10853e-05	4.19459e-05	4.75519e-05		1.08436e-05	9.45345e-06	1.00361e-05	1.00013e-05	9.50961e-06	9.56285e-06		9.7506e-06	9.47025e-06	9.02052e-06	9.21e-06	9.09495e-06	9.75313e-06	9.30166e-06	9.0906e-06
27.3438	1.20249e-05	1.14935e-05	1.48442e-05	1.05971e-05	1.06088e-05	1.0987e-05	1.48025e-05	1.65857e-05	2.21139e-05	1.46949e-05	1.28788e-05	1.2078e-05	6.0743e-06	1.13731e-05	1.63046e-05	3.17097e-05		1.26699e-05	1.40764e-05	1.24913e-05	1.42883e-05	1.41881e-05	1.41961e-05	1.27529e-05	1.66428e-05	1.91003e-05	1.79618e-05	1.38261e-05	1.37642e-05	2.39109e-05	3.08866e-05	4.16867e-05	4.67883e-05		1.0544e-05	9.26939e-06	9.88441e-06	9.85592e-06	9.34981e-06	9.39711e-06		9.58881e-06	9.28879e-06	8.91753e-06	9.22064e-06	9.04611e-06	9.59732e-06	9.37806e-06	9.10988e-06
27.832	1.17914e-05	1.15061e-05	1.46837e-05	1.06237e-05	1.06299e-05	1.09912e-05	1.46136e-05	1.61556e-05	2.103e-05	1.42678e-05	1.26764e-05	1.18339e-05	5.99837e-06	1.14349e-05	1.62051e-05	3.08651e-05		1.27146e-05	1.41992e-05	1.2565e-05	1.44496e-05	1.43494e-05	1.43696e-05	1.28926e-05	1.66625e-05	1.90007e-05	1.81012e-05	1.37976e-05	1.37784e-05	2.35854e-05	3.0086e-05	4.12948e-05	4.54445e-05		1.05138e-05	9.12684e-06	9.70473e-06	9.67516e-06	9.19937e-06	9.25821e-06		9.44004e-06	9.06591e-06	8.75646e-06	9.11979e-06	8.99733e-06	9.44716e-06	9.36318e-06	9.07467e-06
28.3203	1.17432e-05	1.16803e-05	1.47785e-05	1.08379e-05	1.08224e-05	1.11938e-05	1.46822e-05	1.58259e-05	2.01032e-05	1.41337e-05	1.26878e-05	1.17648e-05	6.06089e-06	1.16288e-05	1.63285e-05	3.05455e-05		1.29278e-05	1.42527e-05	1.27826e-05	1.46515e-05	1.45338e-05	1.45607e-05	1.30461e-05	1.66733e-05	1.89615e-05	1.84122e-05	1.37367e-05	1.39656e-05	2.37665e-05	2.96264e-05	4.05984e-05	4.37333e-05		1.06484e-05	9.11548e-06	9.73217e-06	9.70802e-06	9.23933e-06	9.2893e-06		9.47509e-06	9.05175e-06	8.77685e-06	9.15605e-06	9.0848e-06	9.48178e-06	9.36693e-06	9.05871e-06
28.8086	1.17944e-05	1.18744e-05	1.49068e-05	1.11066e-05	1.10783e-05	1.14463e-05	1.48323e-05	1.61857e-05	1.97298e-05	1.42762e-05	1.2849e-05	1.1772e-05	6.03564e-06	1.18994e-05	1.66842e-05	3.00036e-05		1.32313e-05	1.47206e-05	1.30924e-05	1.51182e-05	1.49842e-05	1.5016e-05	1.35471e-05	1.69753e-05	1.92436e-05	1.87929e-05	1.38573e-05	1.4171e-05	2.49389e-05	2.95e-05	3.92662e-05	4.29508e-05		1.07855e-05	9.18766e-06	9.83381e-06	9.79637e-06	9.32024e-06	9.37642e-06		9.56325e-06	9.12568e-06	8.82735e-06	9.1235e-06	9.16805e-06	9.56471e-06	9.4423e-06	9.09494e-06
29.2969	1.19214e-05	1.21494e-05	1.51426e-05	1.14237e-05	1.13866e-05	1.16899e-05	1.51059e-05	1.63423e-05	1.92446e-05	1.42997e-05	1.29841e-05	1.18951e-05	5.91872e-06	1.21523e-05	1.69652e-05	3.01828e-05		1.3106e-05	1.48968e-05	1.29404e-05	1.53831e-05	1.5269e-05	1.5298e-05	1.39126e-05	1.69066e-05	1.93237e-05	1.88108e-05	1.41102e-05	1.39234e-05	2.50689e-05	2.8946e-05	3.87836e-05	4.19793e-05		1.08637e-05	9.13834e-06	9.7936e-06	9.75724e-06	9.30913e-06	9.36336e-06		9.53783e-06	9.23411e-06	8.88698e-06	9.14068e-06	9.0925e-06	9.53477e-06	9.48683e-06	9.15725e-06
29.7852	1.21508e-05	1.23794e-05	1.54479e-05	1.16568e-05	1.16071e-05	1.1919e-05	1.54266e-05	1.67268e-05	1.92473e-05	1.4572e-05	1.32664e-05	1.2098e-05	6.00028e-06	1.24596e-05	1.74221e-05	2.99403e-05		1.31042e-05	1.52555e-05	1.29093e-05	1.57892e-05	1.5673e-05	1.56992e-05	1.42395e-05	1.69324e-05	1.92985e-05	1.90323e-05	1.41581e-05	1.39422e-05	2.55248e-05	2.93147e-05	3.86035e-05	4.10299e-05		1.07847e-05	9.13815e-06	9.87745e-06	9.84464e-06	9.34923e-06	9.40288e-06		9.58416e-06	9.32883e-06	8.96074e-06	9.16775e-06	9.12327e-06	9.56293e-06	9.56432e-06	9.18573e-06
30.2734	1.23149e-05	1.2742e-05	1.5701e-05	1.21057e-05	1.20445e-05	1.23888e-05	1.56952e-05	1.68974e-05	1.91059e-05	1.47016e-05	1.34891e-05	1.22534e-05	5.89566e-06	1.26494e-05	1.761e-05	2.96989e-05		1.32173e-05	1.58936e-05	1.29902e-05	1.65256e-05	1.64481e-05	1.64774e-05	1.47587e-05	1.7126e-05	1.98095e-05	1.96107e-05	1.45864e-05	1.40581e-05	2.57372e-05	2.97415e-05	3.83137e-05	4.14073e-05		1.06651e-05	9.05238e-06	9.77619e-06	9.73535e-06	9.28967e-06	9.33934e-06		9.51538e-06	9.23153e-06	8.84072e-06	8.94879e-06	8.93072e-06	9.49621e-06	9.43679e-06	9.08683e-06
30.7617	1.21785e-05	1.28433e-05	1.56087e-05	1.22875e-05	1.2222e-05	1.26191e-05	1.55367e-05	1.64173e-05	1.82055e-05	1.4299e-05	1.32193e-05	1.21374e-05	5.6356e-06	1.2485e-05	1.72887e-05	2.85714e-05		1.28474e-05	1.59044e-05	1.26312e-05	1.68982e-05	1.68527e-05	1.6865e-05	1.47648e-05	1.6946e-05	1.98273e-05	1.95288e-05	1.44785e-05	1.37237e-05	2.49256e-05	2.96889e-05	3.88681e-05	4.09661e-05		1.01552e-05	8.74974e-06	9.42918e-06	9.39825e-06	9.0135e-06	9.04872e-06		9.2335e-06	8.93617e-06	8.59548e-06	8.70888e-06	8.67518e-06	9.2038e-06	9.34133e-06	8.99977e-06
31.25	1.21819e-05	1.30755e-05	1.57437e-05	1.26494e-05	1.25678e-05	1.2958e-05	1.5682e-05	1.65423e-05	1.75023e-05	1.41002e-05	1.31782e-05	1.21271e-05	5.56412e-06	1.27086e-05	1.75441e-05	2.82388e-05		1.30806e-05	1.59261e-05	1.28337e-05	1.73069e-05	1.72569e-05	1.73164e-05	1.49705e-05	1.69858e-05	1.97024e-05	1.99586e-05	1.45318e-05	1.39444e-05	2.52585e-05	2.97809e-05	3.79248e-05	4.04942e-05		1.0303e-05	8.7507e-06	9.39499e-06	9.37646e-06	8.93143e-06	8.97524e-06		9.14836e-06	8.70762e-06	8.44097e-06	8.55734e-06	8.55338e-06	9.12814e-06	9.14448e-06	8.8516e-06
31.7383	1.22851e-05	1.34311e-05	1.59084e-05	1.30919e-05	1.30125e-05	1.33528e-05	1.58775e-05	1.64517e-05	1.71053e-05	1.40827e-05	1.33586e-05	1.22437e-05	5.53658e-06	1.29966e-05	1.76483e-05	2.80848e-05		1.32402e-05	1.63394e-05	1.30079e-05	1.7892e-05	1.78359e-05	1.78987e-05	1.53148e-05	1.71069e-05	2.0184e-05	2.0219e-05	1.47179e-05	1.40069e-05	2.55732e-05	2.97403e-05	3.74258e-05	4.05089e-05		1.01872e-05	8.76375e-06	9.30076e-06	9.28851e-06	8.92537e-06	8.96943e-06		9.15051e-06	8.61316e-06	8.35205e-06	8.46555e-06	8.49854e-06	9.14538e-06	8.98407e-06	8.77493e-06
32.2266	1.22983e-05	1.38025e-05	1.61828e-05	1.34648e-05	1.33923e-05	1.36811e-05	1.62095e-05	1.63352e-05	1.69252e-05	1.41923e-05	1.34095e-05	1.22719e-05	5.60936e-06	1.32873e-05	1.79371e-05	2.78334e-05		1.3275e-05	1.65931e-05	1.30911e-05	1.8428e-05	1.83614e-05	1.84518e-05	1.54601e-05	1.707e-05	2.01839e-05	2.0308e-05	1.47574e-05	1.39215e-05	2.58522e-05	2.97818e-05	3.72112e-05	3.94466e-05		1.03722e-05	8.70216e-06	9.08308e-06	9.07827e-06	8.64189e-06	8.69692e-06		8.8459e-06	8.37495e-06	8.09957e-06	8.21162e-06	8.24248e-06	8.84968e-06	8.71731e-06	8.60795e-06
32.7148	1.26397e-05	1.44277e-05	1.68058e-05	1.41548e-05	1.40834e-05	1.43124e-05	1.69215e-05	1.69588e-05	1.72946e-05	1.47472e-05	1.40197e-05	1.25902e-05	5.67904e-06	1.40065e-05	1.88359e-05	2.77478e-05		1.37353e-05	1.70783e-05	1.35768e-05	1.91365e-05	1.90701e-05	1.91762e-05	1.59751e-05	1.74135e-05	2.0269e-05	2.06367e-05	1.5042e-05	1.42226e-05	2.6482e-05	3.05755e-05	3.75451e-05	3.90265e-05		1.04451e-05	8.58727e-06	8.84479e-06	8.84968e-06	8.34397e-06	8.40638e-06		8.54769e-06	8.09295e-06	7.8278e-06	7.93231e-06	7.92143e-06	8.56761e-06	8.31709e-06	8.14702e-06
33.2031	1.25814e-05	1.48404e-05	1.70014e-05	1.45506e-05	1.45073e-05	1.46203e-05	1.71104e-05	1.68677e-05	1.68339e-05	1.48071e-05	1.41814e-05	1.25323e-05	5.63375e-06	1.42775e-05	1.91321e-05	2.74108e-05		1.39597e-05	1.78128e-05	1.38803e-05	1.97491e-05	1.96827e-05	1.97984e-05	1.63897e-05	1.79915e-05	2.06521e-05	2.11033e-05	1.51864e-05	1.44037e-05	2.626e-05	3.11797e-05	3.81906e-05	3.9568e-05		1.03205e-05	8.52294e-06	8.69259e-06	8.69052e-06	8.21655e-06	8.26215e-06		8.41992e-06	7.94417e-06	7.6463e-06	7.73724e-06	7.75264e-06	8.42705e-06	8.1119e-06	7.96281e-06
33.6914	1.2598e-05	1.51028e-05	1.70783e-05	1.48341e-05	1.48053e-05	1.49221e-05	1.71935e-05	1.67964e-05	1.65263e-05	1.4803e-05	1.42261e-05	1.2531e-05	5.57846e-06	1.46165e-05	1.91641e-05	2.71098e-05		1.4107e-05	1.79426e-05	1.40352e-05	2.04413e-05	2.03852e-05	2.04803e-05	1.68366e-05	1.82438e-05	2.03319e-05	2.12151e-05	1.53063e-05	1.46197e-05	2.6092e-05	3.09419e-05	3.86914e-05	3.95343e-05		1.01635e-05	8.29532e-06	8.47443e-06	8.46473e-06	8.03681e-06	8.07366e-06		8.24464e-06	7.78007e-06	7.48788e-06	7.58683e-06	7.62486e-06	8.24715e-06	7.99787e-06	7.81438e-06
34.1797	1.27296e-05	1.55287e-05	1.72501e-05	1.53827e-05	1.53449e-05	1.53673e-05	1.73872e-05	1.73293e-05	1.64935e-05	1.48896e-05	1.43371e-05	1.26406e-05	5.49542e-06	1.51697e-05	1.96376e-05	2.70941e-05		1.42904e-05	1.82583e-05	1.42543e-05	2.1e-05	2.09515e-05	2.10051e-05	1.72706e-05	1.88065e-05	2.00624e-05	2.13352e-05	1.5604e-05	1.48136e-05	2.58453e-05	3.05968e-05	3.92328e-05	3.97539e-05		1.01565e-05	7.94761e-06	8.07874e-06	8.06992e-06	7.86162e-06	7.86745e-06		8.0723e-06	7.58719e-06	7.33366e-06	7.45989e-06	7.46805e-06	8.06072e-06	7.79747e-06	7.59651e-06
34.668	1.2498e-05	1.55919e-05	1.69641e-05	1.55447e-05	1.55071e-05	1.54038e-05	1.70671e-05	1.72822e-05	1.57914e-05	1.4508e-05	1.40378e-05	1.24254e-05	5.27824e-06	1.48985e-05	1.93167e-05	2.6844e-05		1.4652e-05	1.8948e-05	1.45706e-05	2.18257e-05	2.17902e-05	2.1814e-05	1.81102e-05	1.95029e-05	2.02797e-05	2.15566e-05	1.59575e-05	1.52773e-05	2.61705e-05	3.06571e-05	3.94246e-05	3.98425e-05		9.71801e-06	7.6448e-06	7.87164e-06	7.84791e-06	7.76382e-06	7.77581e-06		7.96835e-06	7.45802e-06	7.26891e-06	7.40776e-06	7.52392e-06	7.97727e-06	7.80775e-06	7.66547e-06
35.1562	1.27498e-05	1.57817e-05	1.71491e-05	1.58316e-05	1.57976e-05	1.56726e-05	1.72593e-05	1.73731e-05	1.54715e-05	1.44019e-05	1.40989e-05	1.2632e-05	5.24981e-06	1.50439e-05	1.94629e-05	2.65706e-05		1.51069e-05	1.9326e-05	1.49956e-05	2.31379e-05	2.30864e-05	2.31195e-05	1.90753e-05	1.9965e-05	2.03782e-05	2.19568e-05	1.63752e-05	1.56736e-05	2.70496e-05	3.05074e-05	3.90473e-05	3.98035e-05		9.77665e-06	7.37819e-06	7.64055e-06	7.62369e-06	7.70502e-06	7.7217e-06		7.89391e-06	7.29298e-06	7.17597e-06	7.34309e-06	7.48375e-06	7.92495e-06	7.79379e-06	7.68432e-06
35.6445	1.26063e-05	1.56914e-05	1.70019e-05	1.58072e-05	1.57607e-05	1.56113e-05	1.71568e-05	1.73611e-05	1.52003e-05	1.42712e-05	1.39658e-05	1.24478e-05	5.03888e-06	1.50036e-05	1.92793e-05	2.63028e-05		1.55901e-05	2.01428e-05	1.54686e-05	2.43624e-05	2.43311e-05	2.43574e-05	2.01321e-05	2.08957e-05	2.0462e-05	2.2401e-05	1.6869e-05	1.61475e-05	2.78441e-05	3.14426e-05	3.94366e-05	3.9176e-05		9.95928e-06	7.10978e-06	7.3705e-06	7.3562e-06	7.42667e-06	7.44082e-06		7.58019e-06	7.02362e-06	6.92061e-06	7.0706e-06	7.2568e-06	7.62425e-06	7.49103e-06	7.4129e-06
36.1328	1.24623e-05	1.57616e-05	1.69617e-05	1.59291e-05	1.58794e-05	1.57079e-05	1.71482e-05	1.71796e-05	1.4793e-05	1.40303e-05	1.37506e-05	1.23147e-05	4.92758e-06	1.48679e-05	1.9275e-05	2.59754e-05		1.59743e-05	2.06864e-05	1.58381e-05	2.5359e-05	2.53439e-05	2.53577e-05	2.08298e-05	2.1629e-05	2.08683e-05	2.27645e-05	1.69297e-05	1.65597e-05	2.84244e-05	3.24825e-05	3.90902e-05	3.85578e-05		9.93771e-06	6.74463e-06	6.98784e-06	6.9698e-06	7.06624e-06	7.08176e-06		7.20237e-06	6.5906e-06	6.50555e-06	6.66448e-06	6.86633e-06	7.24447e-06	7.1814e-06	7.12525e-06
36.6211	1.25694e-05	1.6048e-05	1.7242e-05	1.62494e-05	1.61843e-05	1.603e-05	1.74444e-05	1.7203e-05	1.46963e-05	1.42101e-05	1.392e-05	1.24352e-05	4.70183e-06	1.50304e-05	1.95675e-05	2.60273e-05		1.65395e-05	2.12754e-05	1.64183e-05	2.69037e-05	2.68642e-05	2.6889e-05	2.20679e-05	2.25694e-05	2.13876e-05	2.33705e-05	1.73234e-05	1.72125e-05	2.91115e-05	3.33771e-05	3.96342e-05	3.86313e-05		1.04348e-05	6.81379e-06	6.975e-06	6.9563e-06	7.04853e-06	7.06068e-06		7.19063e-06	6.58141e-06	6.47415e-06	6.65176e-06	6.79915e-06	7.21467e-06	7.13009e-06	7.07867e-06
37.1094	1.23477e-05	1.6104e-05	1.7179e-05	1.63907e-05	1.62931e-05	1.61586e-05	1.74189e-05	1.72558e-05	1.44642e-05	1.41289e-05	1.37809e-05	1.21997e-05	4.46812e-06	1.50093e-05	1.95823e-05	2.5611e-05		1.66419e-05	2.17595e-05	1.64987e-05	2.81702e-05	2.8091e-05	2.81329e-05	2.29947e-05	2.32343e-05	2.18514e-05	2.35181e-05	1.74988e-05	1.73257e-05	2.98693e-05	3.42766e-05	4.07079e-05	3.83877e-05		1.04581e-05	6.59208e-06	6.6659e-06	6.64507e-06	6.76033e-06	6.75532e-06		6.89441e-06	6.36085e-06	6.1986e-06	6.36946e-06	6.47433e-06	6.89903e-06	6.74347e-06	6.71088e-06
37.5977	1.21326e-05	1.62552e-05	1.71882e-05	1.65362e-05	1.64107e-05	1.62411e-05	1.73919e-05	1.70715e-05	1.42888e-05	1.40995e-05	1.36644e-05	1.19885e-05	4.5961e-06	1.48138e-05	1.95159e-05	2.51382e-05		1.66461e-05	2.18747e-05	1.65089e-05	2.87769e-05	2.86719e-05	2.87347e-05	2.31984e-05	2.34597e-05	2.19031e-05	2.33843e-05	1.73502e-05	1.73575e-05	2.98816e-05	3.48088e-05	4.00988e-05	3.82399e-05		1.06042e-05	6.54195e-06	6.57557e-06	6.55508e-06	6.65092e-06	6.64347e-06		6.79062e-06	6.30786e-06	6.12134e-06	6.34181e-06	6.39252e-06	6.80561e-06	6.6195e-06	6.61027e-06
38.0859	1.21544e-05	1.63535e-05	1.72738e-05	1.65805e-05	1.6437e-05	1.62693e-05	1.74768e-05	1.71844e-05	1.43521e-05	1.42402e-05	1.37672e-05	1.2018e-05	4.47567e-06	1.49114e-05	1.94624e-05	2.49942e-05		1.67684e-05	2.20563e-05	1.66222e-05	2.93998e-05	2.92864e-05	2.93216e-05	2.36437e-05	2.34918e-05	2.21154e-05	2.33489e-05	1.75198e-05	1.74894e-05	2.99407e-05	3.41176e-05	3.98309e-05	3.82096e-05		1.11098e-05	6.80972e-06	6.76674e-06	6.7476e-06	6.79159e-06	6.79503e-06		6.92236e-06	6.54287e-06	6.36268e-06	6.60409e-06	6.58224e-06	6.95506e-06	6.92657e-06	6.88974e-06
38.5742	1.22573e-05	1.64851e-05	1.74092e-05	1.6583e-05	1.64352e-05	1.63189e-05	1.76706e-05	1.71662e-05	1.42932e-05	1.42087e-05	1.37768e-05	1.20906e-05	4.2497e-06	1.49034e-05	1.93255e-05	2.52748e-05		1.62643e-05	2.13835e-05	1.60554e-05	2.8881e-05	2.87928e-05	2.88534e-05	2.32194e-05	2.25493e-05	2.17114e-05	2.28737e-05	1.70922e-05	1.69943e-05	2.94192e-05	3.33517e-05	3.88588e-05	3.72758e-05		1.00479e-05	6.50467e-06	6.52578e-06	6.51526e-06	6.52848e-06	6.52718e-06		6.64006e-06	6.43768e-06	6.2796e-06	6.52593e-06	6.42503e-06	6.67553e-06	6.86686e-06	6.74099e-06
39.0625	1.17608e-05	1.59791e-05	1.68137e-05	1.59903e-05	1.58512e-05	1.56849e-05	1.70282e-05	1.65075e-05	1.37028e-05	1.36814e-05	1.32665e-05	1.15911e-05	4.14822e-06	1.44664e-05	1.86918e-05	2.48322e-05		1.55962e-05	2.02764e-05	1.53619e-05	2.76822e-05	2.76446e-05	2.7672e-05	2.23718e-05	2.16714e-05	2.09475e-05	2.20381e-05	1.62482e-05	1.63036e-05	2.80529e-05	3.18043e-05	3.70249e-05	3.54535e-05		9.25815e-06	6.41667e-06	6.50895e-06	6.50153e-06	6.39532e-06	6.40872e-06		6.51207e-06	6.42589e-06	6.27568e-06	6.463e-06	6.33109e-06	6.53208e-06	6.85633e-06	6.70461e-06
39.5508	1.16391e-05	1.56573e-05	1.64252e-05	1.55707e-05	1.54461e-05	1.53044e-05	1.66958e-05	1.62785e-05	1.35587e-05	1.35104e-05	1.31923e-05	1.14823e-05	3.92772e-06	1.45095e-05	1.88027e-05	2.46979e-05		1.50803e-05	1.93403e-05	1.48193e-05	2.66387e-05	2.66318e-05	2.66157e-05	2.16337e-05	2.06629e-05	2.02062e-05	2.12591e-05	1.5739e-05	1.58423e-05	2.76531e-05	3.07518e-05	3.57379e-05	3.41209e-05		8.23129e-06	6.20963e-06	6.35133e-06	6.34479e-06	6.29868e-06	6.31652e-06		6.42387e-06	6.32653e-06	6.23093e-06	6.3931e-06	6.235e-06	6.42842e-06	6.89869e-06	6.69766e-06
40.0391	1.16745e-05	1.56623e-05	1.64355e-05	1.55574e-05	1.54531e-05	1.53145e-05	1.66976e-05	1.62732e-05	1.35364e-05	1.34718e-05	1.31753e-05	1.15134e-05	3.7062e-06	1.46989e-05	1.88489e-05	2.41293e-05		1.39928e-05	1.772e-05	1.3749e-05	2.49829e-05	2.49605e-05	2.49356e-05	2.01363e-05	1.93135e-05	1.89773e-05	2.00821e-05	1.47198e-05	1.47716e-05	2.61296e-05	2.92699e-05	3.46474e-05	3.22476e-05		7.40018e-06	6.00882e-06	6.22123e-06	6.21711e-06	6.0915e-06	6.103e-06		6.22661e-06	6.2125e-06	6.11877e-06	6.28111e-06	6.0747e-06	6.19161e-06	6.68282e-06	6.44358e-06
40.5273	1.107e-05	1.50144e-05	1.57242e-05	1.49168e-05	1.48291e-05	1.47101e-05	1.59425e-05	1.58617e-05	1.30202e-05	1.29153e-05	1.25697e-05	1.09388e-05	3.68146e-06	1.41985e-05	1.82368e-05	2.33754e-05		1.28494e-05	1.63317e-05	1.26263e-05	2.31853e-05	2.31399e-05	2.31226e-05	1.85681e-05	1.82531e-05	1.76773e-05	1.86478e-05	1.35319e-05	1.35334e-05	2.43212e-05	2.79588e-05	3.32148e-05	3.08863e-05		7.47238e-06	6.09241e-06	6.27762e-06	6.27447e-06	6.18011e-06	6.19219e-06		6.32549e-06	6.38357e-06	6.23997e-06	6.40738e-06	6.16104e-06	6.28018e-06	6.62203e-06	6.43428e-06
41.0156	1.09695e-05	1.48429e-05	1.55522e-05	1.477e-05	1.46838e-05	1.45452e-05	1.57011e-05	1.56491e-05	1.28296e-05	1.27416e-05	1.24253e-05	1.08554e-05	3.72899e-06	1.39351e-05	1.78767e-05	2.27147e-05		1.18469e-05	1.51761e-05	1.16648e-05	2.14157e-05	2.13465e-05	2.13528e-05	1.73163e-05	1.73238e-05	1.65956e-05	1.75451e-05	1.26366e-05	1.24455e-05	2.30265e-05	2.64626e-05	3.17392e-05	2.97925e-05		7.50075e-06	6.21206e-06	6.42453e-06	6.41692e-06	6.35339e-06	6.36647e-06		6.50551e-06	6.6007e-06	6.47562e-06	6.65946e-06	6.40614e-06	6.45441e-06	6.8019e-06	6.68986e-06
41.5039	1.06326e-05	1.44163e-05	1.50759e-05	1.43554e-05	1.42814e-05	1.42124e-05	1.52484e-05	1.51211e-05	1.23831e-05	1.23635e-05	1.20085e-05	1.05268e-05	3.66018e-06	1.33193e-05	1.71073e-05	2.15496e-05		1.07265e-05	1.37648e-05	1.05771e-05	1.97214e-05	1.96567e-05	1.96531e-05	1.60636e-05	1.63761e-05	1.54775e-05	1.64168e-05	1.14719e-05	1.13041e-05	2.16623e-05	2.47079e-05	3.06353e-05	2.97024e-05		7.50655e-06	6.36365e-06	6.56996e-06	6.56436e-06	6.48375e-06	6.49398e-06		6.6372e-06	6.77312e-06	6.66706e-06	6.82755e-06	6.5956e-06	6.58183e-06	7.00792e-06	6.90116e-06
41.9922	1.02654e-05	1.37291e-05	1.43814e-05	1.36978e-05	1.36312e-05	1.36037e-05	1.4562e-05	1.44816e-05	1.19405e-05	1.19392e-05	1.15993e-05	1.01685e-05	3.62502e-06	1.25936e-05	1.61908e-05	2.0725e-05		9.74874e-06	1.27276e-05	9.61599e-06	1.77661e-05	1.76967e-05	1.77219e-05	1.46702e-05	1.55267e-05	1.43105e-05	1.5168e-05	1.05007e-05	1.0229e-05	2.05833e-05	2.36052e-05	2.89223e-05	2.87124e-05		7.28044e-06	6.27963e-06	6.47189e-06	6.46253e-06	6.33801e-06	6.3553e-06		6.4889e-06	6.63971e-06	6.54688e-06	6.69219e-06	6.49856e-06	6.44354e-06	6.81896e-06	6.74689e-06
42.4805	9.90366e-06	1.29569e-05	1.35938e-05	1.29204e-05	1.28558e-05	1.28369e-05	1.3746e-05	1.34638e-05	1.13223e-05	1.12142e-05	1.10215e-05	9.8143e-06	3.56361e-06	1.19169e-05	1.5187e-05	1.94518e-05		9.05811e-06	1.18375e-05	8.96152e-06	1.6353e-05	1.62747e-05	1.62998e-05	1.36042e-05	1.45132e-05	1.32012e-05	1.38612e-05	9.75904e-06	9.50272e-06	1.95173e-05	2.25745e-05	2.75745e-05	2.73614e-05		7.0973e-06	6.18339e-06	6.37191e-06	6.35538e-06	6.26526e-06	6.2792e-06		6.40567e-06	6.53759e-06	6.47131e-06	6.59443e-06	6.47389e-06	6.36905e-06	6.78933e-06	6.69907e-06
42.9688	9.35001e-06	1.20004e-05	1.25631e-05	1.19547e-05	1.18846e-05	1.18537e-05	1.2707e-05	1.25271e-05	1.07439e-05	1.05566e-05	1.04637e-05	9.26856e-06	3.39019e-06	1.11875e-05	1.40876e-05	1.8535e-05		8.41668e-06	1.10756e-05	8.32091e-06	1.51097e-05	1.50104e-05	1.50181e-05	1.25395e-05	1.35177e-05	1.22659e-05	1.29468e-05	9.1238e-06	8.86696e-06	1.83513e-05	2.12357e-05	2.59096e-05	2.60224e-05		6.95206e-06	6.0474e-06	6.21978e-06	6.20404e-06	6.08081e-06	6.0898e-06		6.20739e-06	6.39041e-06	6.30317e-06	6.39814e-06	6.2636e-06	6.1815e-06	6.63146e-06	6.49195e-06
43.457	9.00433e-06	1.13034e-05	1.18646e-05	1.12125e-05	1.11368e-05	1.1165e-05	1.20003e-05	1.18006e-05	1.03792e-05	1.00793e-05	9.99135e-06	8.93139e-06	3.23699e-06	1.06038e-05	1.33348e-05	1.78391e-05		7.78813e-06	1.02795e-05	7.70432e-06	1.37946e-05	1.37191e-05	1.37316e-05	1.14303e-05	1.24748e-05	1.13936e-05	1.20014e-05	8.60591e-06	8.26832e-06	1.67247e-05	2.01753e-05	2.44562e-05	2.46972e-05		6.83461e-06	5.789e-06	6.00048e-06	5.97987e-06	5.83112e-06	5.84093e-06		5.946e-06	6.16135e-06	6.03115e-06	6.1106e-06	6.00591e-06	5.92906e-06	6.2651e-06	6.13443e-06
43.9453	8.53351e-06	1.04442e-05	1.09878e-05	1.03725e-05	1.02774e-05	1.03559e-05	1.11021e-05	1.10874e-05	9.60895e-06	9.28937e-06	9.24963e-06	8.46429e-06	3.08205e-06	9.87038e-06	1.23956e-05	1.70489e-05		7.06675e-06	9.57891e-06	7.0287e-06	1.2578e-05	1.25108e-05	1.25205e-05	1.05129e-05	1.15423e-05	1.03739e-05	1.08983e-05	8.04802e-06	7.53409e-06	1.52789e-05	1.88855e-05	2.32119e-05	2.35155e-05		6.88135e-06	5.73633e-06	5.92339e-06	5.90691e-06	5.75266e-06	5.76411e-06		5.87398e-06	6.15809e-06	6.02493e-06	6.07575e-06	5.99315e-06	5.85434e-06	6.18039e-06	6.07493e-06
44.4336	8.0432e-06	9.75537e-06	1.02369e-05	9.72192e-06	9.59991e-06	9.71253e-06	1.03469e-05	1.06524e-05	9.0515e-06	8.77852e-06	8.73889e-06	7.97472e-06	2.93372e-06	9.19907e-06	1.16219e-05	1.64448e-05		6.60091e-06	8.81448e-06	6.57124e-06	1.13522e-05	1.1302e-05	1.13075e-05	9.57298e-06	1.04921e-05	9.71393e-06	1.02488e-05	7.63914e-06	7.06006e-06	1.41213e-05	1.73255e-05	2.1929e-05	2.19796e-05		6.81258e-06	5.59646e-06	5.78635e-06	5.77474e-06	5.6194e-06	5.63266e-06		5.73855e-06	6.02878e-06	5.86633e-06	5.90154e-06	5.80644e-06	5.72817e-06	5.9926e-06	5.96126e-06
44.9219	7.59348e-06	9.03341e-06	9.53345e-06	9.01735e-06	8.89413e-06	9.03404e-06	9.63907e-06	1.00996e-05	8.43782e-06	8.21886e-06	8.15856e-06	7.51872e-06	2.89074e-06	8.45314e-06	1.08146e-05	1.56281e-05		6.11845e-06	8.10331e-06	6.08307e-06	1.03797e-05	1.03372e-05	1.03399e-05	8.80866e-06	9.765e-06	8.95425e-06	9.66513e-06	7.20694e-06	6.64125e-06	1.29538e-05	1.63013e-05	2.07785e-05	2.13392e-05		6.60587e-06	5.43471e-06	5.56814e-06	5.55649e-06	5.40789e-06	5.43226e-06		5.53157e-06	5.84275e-06	5.64504e-06	5.68183e-06	5.62582e-06	5.52544e-06	5.75293e-06	5.71039e-06
45.4102	7.16058e-06	8.45194e-06	8.89648e-06	8.46423e-06	8.33158e-06	8.48659e-06	8.99231e-06	9.81896e-06	7.84106e-06	7.7273e-06	7.65185e-06	7.0885e-06	2.76746e-06	7.94909e-06	1.01847e-05	1.48812e-05		5.74185e-06	7.56303e-06	5.75205e-06	9.51136e-06	9.46981e-06	9.48028e-06	8.20968e-06	9.26487e-06	8.33784e-06	9.04285e-06	6.73556e-06	6.21487e-06	1.24457e-05	1.54203e-05	1.99931e-05	2.04402e-05		6.482e-06	5.32864e-06	5.46082e-06	5.4492e-06	5.3223e-06	5.35286e-06		5.44368e-06	5.67696e-06	5.44934e-06	5.48258e-06	5.46969e-06	5.4431e-06	5.54271e-06	5.49011e-06
45.8984	6.75175e-06	7.86604e-06	8.30612e-06	7.90914e-06	7.76946e-06	7.94348e-06	8.40277e-06	9.54738e-06	7.39246e-06	7.274e-06	7.19694e-06	6.67961e-06	2.73013e-06	7.42464e-06	9.47731e-06	1.44778e-05		5.39735e-06	7.09283e-06	5.40121e-06	8.86839e-06	8.82645e-06	8.82403e-06	7.69678e-06	8.65256e-06	7.8881e-06	8.62288e-06	6.26935e-06	5.7907e-06	1.20388e-05	1.51661e-05	1.91266e-05	1.92346e-05		6.33224e-06	5.18495e-06	5.27631e-06	5.26671e-06	5.18506e-06	5.21849e-06		5.30745e-06	5.54282e-06	5.29382e-06	5.3545e-06	5.32308e-06	5.30944e-06	5.42666e-06	5.36328e-06
46.3867	6.43743e-06	7.22881e-06	7.68093e-06	7.28008e-06	7.1488e-06	7.3032e-06	7.78954e-06	9.0792e-06	7.01712e-06	6.9052e-06	6.7664e-06	6.37318e-06	2.66263e-06	6.95289e-06	8.83719e-06	1.40253e-05		5.18623e-06	6.75683e-06	5.19745e-06	8.30985e-06	8.27798e-06	8.27898e-06	7.31386e-06	8.26738e-06	7.49895e-06	8.34523e-06	5.85067e-06	5.57723e-06	1.16699e-05	1.47031e-05	1.85934e-05	1.87131e-05		6.02764e-06	5.02962e-06	5.13537e-06	5.1279e-06	5.07991e-06	5.12457e-06		5.20718e-06	5.37772e-06	5.12254e-06	5.1875e-06	5.14399e-06	5.2075e-06	5.26265e-06	5.17702e-06
46.875	6.08767e-06	6.729e-06	7.13869e-06	6.76985e-06	6.63385e-06	6.77772e-06	7.28589e-06	8.47639e-06	6.66402e-06	6.52613e-06	6.38623e-06	6.0555e-06	2.6204e-06	6.53835e-06	8.30928e-06	1.32338e-05		4.99421e-06	6.42981e-06	4.98362e-06	7.92602e-06	7.89761e-06	7.89439e-06	7.09343e-06	7.93288e-06	7.09251e-06	7.95585e-06	5.49869e-06	5.33132e-06	1.13042e-05	1.40804e-05	1.80778e-05	1.77971e-05		5.93973e-06	4.95117e-06	5.05196e-06	5.04319e-06	4.97635e-06	5.03125e-06		5.11216e-06	5.29466e-06	5.03211e-06	5.08255e-06	5.05376e-06	5.10763e-06	5.12907e-06	5.03057e-06
47.3633	5.77131e-06	6.26246e-06	6.68514e-06	6.31415e-06	6.18172e-06	6.28633e-06	6.8442e-06	7.95796e-06	6.25776e-06	6.10537e-06	5.98147e-06	5.73149e-06	2.64402e-06	6.15607e-06	7.7569e-06	1.25799e-05		4.74856e-06	6.13739e-06	4.73616e-06	7.4322e-06	7.41016e-06	7.38784e-06	6.72536e-06	7.45221e-06	6.64006e-06	7.44392e-06	5.13681e-06	5.05915e-06	1.062e-05	1.36545e-05	1.73713e-05	1.7175e-05		5.79359e-06	4.80466e-06	4.86817e-06	4.86706e-06	4.80405e-06	4.8626e-06		4.9373e-06	5.06227e-06	4.8263e-06	4.88722e-06	4.87657e-06	4.94407e-06	4.92197e-06	4.85155e-06
47.8516	5.43935e-06	5.82421e-06	6.22888e-06	5.87819e-06	5.75358e-06	5.82852e-06	6.41659e-06	7.49597e-06	5.95637e-06	5.7223e-06	5.56848e-06	5.41164e-06	2.56494e-06	5.82253e-06	7.31932e-06	1.20483e-05		4.57713e-06	5.88584e-06	4.52953e-06	6.95112e-06	6.93708e-06	6.92109e-06	6.31111e-06	7.2056e-06	6.32821e-06	7.02016e-06	4.89802e-06	4.88777e-06	1.01493e-05	1.31956e-05	1.67279e-05	1.64998e-05		5.73487e-06	4.82877e-06	4.84625e-06	4.84812e-06	4.7655e-06	4.81939e-06		4.89867e-06	4.97658e-06	4.76851e-06	4.87493e-06	4.87914e-06	4.90057e-06	4.91945e-06	4.83894e-06
48.3398	5.1391e-06	5.48734e-06	5.89812e-06	5.50749e-06	5.40123e-06	5.4739e-06	6.09179e-06	7.1297e-06	5.61258e-06	5.35922e-06	5.23162e-06	5.11184e-06	2.4482e-06	5.47534e-06	6.95079e-06	1.13403e-05		4.37358e-06	5.56325e-06	4.31903e-06	6.54584e-06	6.53966e-06	6.52224e-06	6.01145e-06	6.9707e-06	6.18074e-06	6.7528e-06	4.78611e-06	4.70622e-06	9.58745e-06	1.28412e-05	1.62666e-05	1.591e-05		5.67439e-06	4.78127e-06	4.77115e-06	4.7745e-06	4.65506e-06	4.69894e-06		4.78009e-06	4.84921e-06	4.63288e-06	4.72878e-06	4.7482e-06	4.77927e-06	4.78509e-06	4.72952e-06
48.8281	5.17908e-06	5.39043e-06	5.89515e-06	5.42691e-06	5.32789e-06	5.43409e-06	6.10454e-06	7.25631e-06	5.74617e-06	5.22065e-06	5.0605e-06	5.11996e-06	2.43986e-06	5.33113e-06	6.85819e-06	1.13342e-05		4.44421e-06	5.56415e-06	4.37712e-06	6.47995e-06	6.47408e-06	6.44002e-06	5.91149e-06	6.99283e-06	6.30343e-06	6.79175e-06	4.82546e-06	4.72045e-06	9.591e-06	1.28197e-05	1.61234e-05	1.59117e-05		6.58571e-06	4.94798e-06	4.86655e-06	4.87822e-06	4.78422e-06	4.81716e-06		4.89173e-06	4.89869e-06	4.65805e-06	4.73611e-06	4.77394e-06	4.87797e-06	4.87723e-06	4.8442e-06
49.3164	5.55412e-06	5.31946e-06	6.13227e-06	5.35239e-06	5.25486e-06	5.44059e-06	6.36611e-06	7.61513e-06	6.43571e-06	5.34306e-06	5.09418e-06	5.40445e-06	2.35802e-06	5.31449e-06	6.86808e-06	1.18838e-05		4.94437e-06	5.8108e-06	4.81395e-06	6.86878e-06	6.83151e-06	6.82823e-06	6.12037e-06	7.90553e-06	7.21357e-06	7.31824e-06	5.13165e-06	5.20061e-06	9.93266e-06	1.28648e-05	1.61797e-05	1.60524e-05		9.45317e-06	5.38501e-06	5.16187e-06	5.18281e-06	5.28901e-06	5.31938e-06		5.37829e-06	5.17768e-06	4.81367e-06	4.80546e-06	4.94093e-06	5.30396e-06	5.13671e-06	5.05777e-06
49.8047	5.41153e-06	5.16821e-06	5.96883e-06	5.17878e-06	5.10687e-06	5.29688e-06	6.21399e-06	7.42239e-06	6.36782e-06	5.25649e-06	5.03109e-06	5.26019e-06	2.3054e-06	5.19119e-06	6.73387e-06	1.17795e-05		4.95908e-06	5.81143e-06	4.83012e-06	6.72718e-06	6.6834e-06	6.66506e-06	6.04593e-06	7.71549e-06	7.20913e-06	7.22054e-06	5.0427e-06	5.23093e-06	9.7719e-06	1.26148e-05	1.58032e-05	1.59298e-05		9.57965e-06	5.42177e-06	5.19316e-06	5.20847e-06	5.33028e-06	5.35274e-06		5.40399e-06	5.15945e-06	4.78671e-06	4.74604e-06	4.854e-06	5.32268e-06	5.1604e-06	5.07028e-06
50.293	5.3066e-06	4.97947e-06	5.79973e-06	4.95626e-06	4.89346e-06	5.11893e-06	6.03929e-06	7.18218e-06	6.2925e-06	5.17356e-06	4.89424e-06	5.16335e-06	2.3783e-06	5.06044e-06	6.47193e-06	1.13299e-05		4.91662e-06	5.76851e-06	4.7766e-06	6.46411e-06	6.414e-06	6.38942e-06	5.79841e-06	7.54391e-06	7.02888e-06	7.18273e-06	4.91259e-06	5.07528e-06	9.68705e-06	1.22237e-05	1.5307e-05	1.59433e-05		9.53742e-06	5.3648e-06	5.1751e-06	5.18531e-06	5.31339e-06	5.33145e-06		5.38025e-06	5.07939e-06	4.72741e-06	4.67889e-06	4.8117e-06	5.30231e-06	5.11112e-06	4.99367e-06
50.7812	5.14231e-06	4.79988e-06	5.63036e-06	4.75589e-06	4.69541e-06	4.93945e-06	5.84514e-06	6.79554e-06	6.10618e-06	5.00995e-06	4.72492e-06	5.01557e-06	2.35086e-06	4.87826e-06	6.23273e-06	1.10212e-05		4.83836e-06	5.58214e-06	4.69244e-06	6.28026e-06	6.24151e-06	6.21148e-06	5.62144e-06	7.42376e-06	6.9481e-06	7.02213e-06	4.77676e-06	4.95953e-06	9.15221e-06	1.1718e-05	1.48564e-05	1.56806e-05		9.30424e-06	5.21471e-06	5.03051e-06	5.03685e-06	5.23859e-06	5.25598e-06		5.31077e-06	4.99261e-06	4.67928e-06	4.63843e-06	4.80126e-06	5.21999e-06	5.08311e-06	4.9908e-06
51.2695	4.18183e-06	4.29544e-06	4.7186e-06	4.22212e-06	4.19182e-06	4.3677e-06	4.88609e-06	5.81076e-06	4.78006e-06	4.32912e-06	4.22142e-06	4.16803e-06	2.30346e-06	4.48406e-06	5.6489e-06	9.95736e-06		3.98469e-06	4.99498e-06	3.95293e-06	5.36934e-06	5.36482e-06	5.30148e-06	4.93357e-06	5.91354e-06	5.83003e-06	6.18154e-06	4.36349e-06	4.21427e-06	8.21074e-06	1.07071e-05	1.38301e-05	1.45523e-05		5.52282e-06	4.47001e-06	4.48957e-06	4.47843e-06	4.4399e-06	4.46117e-06		4.53465e-06	4.40805e-06	4.34659e-06	4.41719e-06	4.43138e-06	4.52059e-06	4.69232e-06	4.60907e-06
51.7578	3.94346e-06	4.08416e-06	4.47716e-06	4.03998e-06	4.01648e-06	4.15347e-06	4.63028e-06	5.5209e-06	4.47487e-06	4.09475e-06	3.95903e-06	3.94639e-06	2.27003e-06	4.24738e-06	5.38555e-06	9.64968e-06		3.79007e-06	4.7772e-06	3.75474e-06	5.14541e-06	5.14813e-06	5.09516e-06	4.69665e-06	5.70679e-06	5.60784e-06	6.06603e-06	4.2796e-06	4.01228e-06	7.93843e-06	1.04803e-05	1.35718e-05	1.41773e-05		5.13789e-06	4.2891e-06	4.33558e-06	4.31976e-06	4.29235e-06	4.31133e-06		4.37907e-06	4.25022e-06	4.18337e-06	4.26134e-06	4.32408e-06	4.38011e-06	4.58821e-06	4.53241e-06
52.2461	3.73007e-06	3.95818e-06	4.28787e-06	3.91964e-06	3.89661e-06	4.01922e-06	4.42566e-06	5.34375e-06	4.29592e-06	3.89593e-06	3.73845e-06	3.74856e-06	2.19067e-06	4.06338e-06	5.26947e-06	9.54191e-06		3.70601e-06	4.6236e-06	3.67041e-06	5.03743e-06	5.04666e-06	4.99229e-06	4.57196e-06	5.52167e-06	5.5106e-06	5.86701e-06	4.25911e-06	3.92324e-06	7.75295e-06	1.03301e-05	1.35388e-05	1.38709e-05		4.99476e-06	4.1703e-06	4.21718e-06	4.2049e-06	4.14425e-06	4.15848e-06		4.22636e-06	4.14522e-06	4.10875e-06	4.17271e-06	4.23802e-06	4.22794e-06	4.45177e-06	4.41871e-06
52.7344	3.63352e-06	3.87666e-06	4.16911e-06	3.87322e-06	3.84273e-06	3.93232e-06	4.30738e-06	5.24379e-06	4.15485e-06	3.78014e-06	3.65353e-06	3.64709e-06	2.01217e-06	4.03579e-06	5.14164e-06	9.32384e-06		3.63234e-06	4.5333e-06	3.55662e-06	4.88127e-06	4.88215e-06	4.83796e-06	4.45124e-06	5.36624e-06	5.31713e-06	5.71242e-06	4.15532e-06	3.86086e-06	7.48639e-06	1.0532e-05	1.37983e-05	1.32411e-05		4.95399e-06	4.10353e-06	4.16219e-06	4.15564e-06	4.11415e-06	4.13116e-06		4.19718e-06	4.09994e-06	4.07701e-06	4.14772e-06	4.19778e-06	4.19935e-06	4.45104e-06	4.38183e-06
53.2227	3.5304e-06	3.74304e-06	4.05074e-06	3.75921e-06	3.71207e-06	3.8042e-06	4.19574e-06	5.08004e-06	4.05985e-06	3.68323e-06	3.53768e-06	3.5321e-06	1.94022e-06	3.87239e-06	4.97857e-06	9.09862e-06		3.50259e-06	4.48168e-06	3.41382e-06	4.68211e-06	4.6893e-06	4.64969e-06	4.3351e-06	5.25531e-06	5.00228e-06	5.44865e-06	4.00539e-06	3.70556e-06	7.34337e-06	1.05251e-05	1.37743e-05	1.29274e-05		4.90152e-06	4.06822e-06	4.11704e-06	4.11283e-06	4.02626e-06	4.03351e-06		4.11323e-06	4.02936e-06	3.99361e-06	4.06573e-06	4.09683e-06	4.10256e-06	4.3236e-06	4.25163e-06
53.7109	3.44913e-06	3.65274e-06	3.93875e-06	3.68353e-06	3.61514e-06	3.72897e-06	4.07408e-06	4.90929e-06	4.00476e-06	3.62825e-06	3.46237e-06	3.4442e-06	1.84358e-06	3.74967e-06	4.79102e-06	8.85148e-06		3.35147e-06	4.4748e-06	3.25484e-06	4.50005e-06	4.51863e-06	4.48139e-06	4.24685e-06	5.23607e-06	4.77314e-06	5.315e-06	3.86868e-06	3.53598e-06	7.10468e-06	1.02016e-05	1.35684e-05	1.27165e-05		4.81555e-06	4.01045e-06	4.06443e-06	4.06854e-06	3.98601e-06	3.99211e-06		4.07431e-06	3.98264e-06	3.96578e-06	4.04424e-06	4.10236e-06	4.05447e-06	4.27749e-06	4.2142e-06
54.1992	3.37319e-06	3.56215e-06	3.80439e-06	3.5838e-06	3.4924e-06	3.60358e-06	3.92561e-06	4.80114e-06	3.81778e-06	3.49054e-06	3.38238e-06	3.36189e-06	1.70446e-06	3.68093e-06	4.60919e-06	8.63811e-06		3.19329e-06	4.34615e-06	3.11383e-06	4.432e-06	4.45385e-06	4.42284e-06	4.22377e-06	5.16692e-06	4.68245e-06	5.19443e-06	3.77116e-06	3.42795e-06	7.00978e-06	9.95386e-06	1.35585e-05	1.26184e-05		4.88037e-06	3.97085e-06	4.03039e-06	4.03523e-06	3.94841e-06	3.97049e-06		4.04703e-06	3.88149e-06	3.86019e-06	3.946e-06	3.97059e-06	4.03671e-06	4.16794e-06	4.1099e-06
54.6875	3.32782e-06	3.50048e-06	3.7261e-06	3.51367e-06	3.41229e-06	3.52371e-06	3.83437e-06	4.67069e-06	3.70398e-06	3.39338e-06	3.30612e-06	3.30337e-06	1.76085e-06	3.55987e-06	4.46572e-06	8.4859e-06		3.06044e-06	4.21452e-06	2.99871e-06	4.39359e-06	4.40842e-06	4.38636e-06	4.19939e-06	5.12341e-06	4.60251e-06	5.04684e-06	3.65527e-06	3.31072e-06	7.04582e-06	9.55914e-06	1.32804e-05	1.23931e-05		4.8794e-06	3.9374e-06	4.00232e-06	4.00602e-06	3.96438e-06	4.00127e-06		4.06311e-06	3.83022e-06	3.83711e-06	3.91486e-06	3.93179e-06	4.07064e-06	4.14637e-06	4.12992e-06
55.1758	3.24748e-06	3.40745e-06	3.62644e-06	3.41621e-06	3.31247e-06	3.47627e-06	3.74023e-06	4.61776e-06	3.60016e-06	3.3269e-06	3.24131e-06	3.21998e-06	1.74239e-06	3.45896e-06	4.36423e-06	8.41925e-06		3.02565e-06	4.19464e-06	2.95813e-06	4.34536e-06	4.35532e-06	4.34471e-06	4.15946e-06	5.17916e-06	4.67644e-06	5.05714e-06	3.62635e-06	3.32573e-06	7.25019e-06	9.35346e-06	1.26347e-05	1.23912e-05		4.8986e-06	3.94471e-06	4.04375e-06	4.04264e-06	4.02161e-06	4.05941e-06		4.11517e-06	3.83613e-06	3.84192e-06	3.91066e-06	3.93623e-06	4.14024e-06	4.25659e-06	4.21223e-06
55.6641	3.19333e-06	3.35152e-06	3.5593e-06	3.35862e-06	3.24841e-06	3.41047e-06	3.66842e-06	4.46627e-06	3.52201e-06	3.26558e-06	3.17997e-06	3.17869e-06	1.77755e-06	3.39962e-06	4.29418e-06	8.16469e-06		2.98537e-06	4.26086e-06	2.92548e-06	4.36578e-06	4.36092e-06	4.3485e-06	4.14866e-06	5.18858e-06	4.51347e-06	4.94409e-06	3.64482e-06	3.30689e-06	7.16066e-06	9.31586e-06	1.26172e-05	1.2129e-05		5.07805e-06	3.98622e-06	4.08037e-06	4.07348e-06	4.07692e-06	4.11283e-06		4.16634e-06	3.85514e-06	3.84253e-06	3.91976e-06	3.96847e-06	4.18567e-06	4.35378e-06	4.24992e-06
56.1523	3.22002e-06	3.36617e-06	3.60612e-06	3.38647e-06	3.27522e-06	3.46122e-06	3.72854e-06	4.57369e-06	3.5632e-06	3.3327e-06	3.22222e-06	3.22e-06	1.77589e-06	3.42965e-06	4.35746e-06	8.07798e-06		2.94786e-06	4.1496e-06	2.90438e-06	4.35284e-06	4.3435e-06	4.32965e-06	4.10888e-06	5.16344e-06	4.39014e-06	4.95846e-06	3.56005e-06	3.29324e-06	7.04948e-06	9.43422e-06	1.22437e-05	1.18083e-05		5.17926e-06	3.99073e-06	4.09774e-06	4.08854e-06	4.07246e-06	4.10433e-06		4.15995e-06	3.84785e-06	3.85488e-06	3.9266e-06	3.96957e-06	4.17872e-06	4.37365e-06	4.30479e-06
56.6406	3.13937e-06	3.28883e-06	3.53236e-06	3.30477e-06	3.20818e-06	3.37084e-06	3.65626e-06	4.50987e-06	3.49929e-06	3.27921e-06	3.1426e-06	3.13925e-06	1.72315e-06	3.33085e-06	4.30414e-06	7.79903e-06		2.88062e-06	4.17199e-06	2.86155e-06	4.30884e-06	4.30664e-06	4.29568e-06	4.05448e-06	5.2592e-06	4.22481e-06	4.98193e-06	3.51597e-06	3.24256e-06	6.94125e-06	9.4203e-06	1.18532e-05	1.16642e-05		5.22086e-06	3.95701e-06	4.06432e-06	4.04994e-06	3.96766e-06	3.98485e-06		4.05013e-06	3.77843e-06	3.76885e-06	3.85974e-06	3.9058e-06	4.05424e-06	4.25398e-06	4.22078e-06
57.1289	3.07694e-06	3.26229e-06	3.49536e-06	3.26257e-06	3.18248e-06	3.3459e-06	3.61185e-06	4.52061e-06	3.46276e-06	3.25796e-06	3.0969e-06	3.07618e-06	1.656e-06	3.31535e-06	4.26739e-06	7.77838e-06		2.82083e-06	4.10048e-06	2.7995e-06	4.23644e-06	4.24544e-06	4.23757e-06	3.89581e-06	5.23002e-06	4.05247e-06	4.86092e-06	3.40708e-06	3.1307e-06	6.75591e-06	9.36694e-06	1.19856e-05	1.16745e-05		5.13202e-06	3.91695e-06	3.98807e-06	3.9716e-06	3.83106e-06	3.85189e-06		3.91316e-06	3.72898e-06	3.71774e-06	3.80741e-06	3.82111e-06	3.91507e-06	4.08879e-06	4.02694e-06
57.6172	2.99599e-06	3.18673e-06	3.41072e-06	3.18029e-06	3.1298e-06	3.26194e-06	3.51853e-06	4.52467e-06	3.45411e-06	3.1857e-06	2.99559e-06	2.99346e-06	1.70257e-06	3.24555e-06	4.21098e-06	7.72807e-06		2.71984e-06	3.92021e-06	2.71991e-06	4.09474e-06	4.10148e-06	4.10699e-06	3.75964e-06	5.08008e-06	4.00074e-06	4.70576e-06	3.27788e-06	2.99857e-06	6.50365e-06	9.08307e-06	1.16695e-05	1.13679e-05		4.98234e-06	3.89415e-06	3.95561e-06	3.93825e-06	3.77661e-06	3.80342e-06		3.86239e-06	3.71629e-06	3.69126e-06	3.77884e-06	3.79691e-06	3.87621e-06	3.96654e-06	3.99295e-06
58.1055	2.95266e-06	3.15637e-06	3.37336e-06	3.10232e-06	3.07502e-06	3.18865e-06	3.46869e-06	4.38136e-06	3.37728e-06	3.09963e-06	2.92849e-06	2.93949e-06	1.72365e-06	3.17456e-06	4.15017e-06	7.68339e-06		2.62142e-06	3.82372e-06	2.59733e-06	4.02998e-06	4.03481e-06	4.03196e-06	3.66063e-06	5.04086e-06	3.9786e-06	4.55594e-06	3.17258e-06	2.83101e-06	6.37637e-06	8.65627e-06	1.14208e-05	1.13956e-05		4.68574e-06	3.80359e-06	3.83856e-06	3.82035e-06	3.72832e-06	3.75112e-06		3.81048e-06	3.68371e-06	3.66532e-06	3.77025e-06	3.77489e-06	3.82613e-06	3.9403e-06	3.93274e-06
58.5938	2.90776e-06	3.11327e-06	3.32818e-06	3.04935e-06	3.04438e-06	3.15673e-06	3.42959e-06	4.35773e-06	3.30459e-06	2.99979e-06	2.88343e-06	2.89507e-06	1.73762e-06	3.15749e-06	4.09473e-06	7.63684e-06		2.60484e-06	3.78568e-06	2.55712e-06	3.86317e-06	3.88541e-06	3.88036e-06	3.53684e-06	4.91005e-06	4.02775e-06	4.54398e-06	3.11881e-06	2.78713e-06	6.34023e-06	8.50271e-06	1.14735e-05	1.12297e-05		4.57557e-06	3.852e-06	3.882e-06	3.86568e-06	3.78057e-06	3.80589e-06		3.8671e-06	3.7292e-06	3.71909e-06	3.81037e-06	3.81936e-06	3.88128e-06	3.96294e-06	3.9323e-06
59.082	2.85214e-06	3.0437e-06	3.25225e-06	2.97854e-06	2.98698e-06	3.0914e-06	3.36254e-06	4.23164e-06	3.23336e-06	2.93193e-06	2.83802e-06	2.83748e-06	1.73655e-06	3.13532e-06	4.11542e-06	7.46398e-06		2.5631e-06	3.70133e-06	2.51023e-06	3.80557e-06	3.83594e-06	3.82827e-06	3.518e-06	4.8176e-06	3.93855e-06	4.44071e-06	3.13433e-06	2.74817e-06	6.20558e-06	8.274e-06	1.12083e-05	1.0872e-05		4.46474e-06	3.79549e-06	3.84266e-06	3.82741e-06	3.76233e-06	3.78952e-06		3.84774e-06	3.68712e-06	3.67398e-06	3.74882e-06	3.80433e-06	3.86324e-06	3.92631e-06	3.88913e-06
59.5703	2.86495e-06	3.00308e-06	3.23374e-06	2.93182e-06	2.93809e-06	3.04386e-06	3.35298e-06	4.0849e-06	3.14183e-06	2.89906e-06	2.8146e-06	2.84929e-06	1.67245e-06	3.08444e-06	4.07978e-06	7.22255e-06		2.49674e-06	3.51998e-06	2.45065e-06	3.69198e-06	3.7365e-06	3.71744e-06	3.47433e-06	4.60539e-06	3.89081e-06	4.39564e-06	3.05092e-06	2.6793e-06	6.08989e-06	8.16206e-06	1.08365e-05	1.05101e-05		4.28702e-06	3.70291e-06	3.8005e-06	3.78835e-06	3.6966e-06	3.72588e-06		3.78471e-06	3.67417e-06	3.66296e-06	3.73592e-06	3.78147e-06	3.79696e-06	3.90936e-06	3.8373e-06
60.0586	2.83817e-06	2.96183e-06	3.18421e-06	2.88765e-06	2.89529e-06	2.98318e-06	3.30711e-06	4.05855e-06	3.0753e-06	2.89233e-06	2.81975e-06	2.81926e-06	1.55038e-06	3.07716e-06	4.13683e-06	7.10279e-06		2.47432e-06	3.49147e-06	2.42464e-06	3.62027e-06	3.66198e-06	3.64889e-06	3.46956e-06	4.50616e-06	3.89611e-06	4.46849e-06	3.07403e-06	2.69232e-06	6.06994e-06	8.11019e-06	1.0694e-05	1.04195e-05		4.11453e-06	3.62517e-06	3.73172e-06	3.72299e-06	3.62511e-06	3.65503e-06		3.71349e-06	3.56951e-06	3.57752e-06	3.66542e-06	3.68177e-06	3.72211e-06	3.86372e-06	3.80775e-06
60.5469	2.78668e-06	2.89761e-06	3.09927e-06	2.8057e-06	2.80672e-06	2.91434e-06	3.24584e-06	3.93588e-06	2.96975e-06	2.859e-06	2.79032e-06	2.77743e-06	1.49053e-06	3.04493e-06	4.09873e-06	6.94786e-06		2.45158e-06	3.41971e-06	2.42325e-06	3.54033e-06	3.55936e-06	3.54108e-06	3.4141e-06	4.39073e-06	3.92748e-06	4.48461e-06	3.07544e-06	2.6841e-06	6.08368e-06	7.94588e-06	1.03669e-05	1.01147e-05		4.16079e-06	3.5793e-06	3.68482e-06	3.6733e-06	3.6097e-06	3.6388e-06		3.69793e-06	3.52172e-06	3.51193e-06	3.61691e-06	3.6811e-06	3.70446e-06	3.8238e-06	3.7251e-06
61.0352	2.68457e-06	2.82896e-06	3.00476e-06	2.73409e-06	2.72416e-06	2.83086e-06	3.13567e-06	3.80509e-06	2.87027e-06	2.80881e-06	2.71639e-06	2.6823e-06	1.46048e-06	2.95355e-06	3.9546e-06	6.79619e-06		2.38592e-06	3.3923e-06	2.37968e-06	3.50549e-06	3.53551e-06	3.50485e-06	3.3603e-06	4.34173e-06	3.92444e-06	4.41217e-06	3.04398e-06	2.62239e-06	5.82862e-06	7.82079e-06	1.02703e-05	1.01529e-05		3.99909e-06	3.4754e-06	3.54802e-06	3.53946e-06	3.49852e-06	3.52572e-06		3.5908e-06	3.46156e-06	3.44772e-06	3.53744e-06	3.57882e-06	3.59572e-06	3.76455e-06	3.66155e-06
61.5234	2.65553e-06	2.80001e-06	2.96089e-06	2.72701e-06	2.70682e-06	2.84535e-06	3.06747e-06	3.85021e-06	2.8446e-06	2.82218e-06	2.71806e-06	2.65408e-06	1.4682e-06	2.92891e-06	3.91853e-06	6.80742e-06		2.33593e-06	3.41085e-06	2.33311e-06	3.52498e-06	3.55109e-06	3.51314e-06	3.32603e-06	4.27198e-06	3.84384e-06	4.31654e-06	2.96461e-06	2.56302e-06	5.61611e-06	7.59313e-06	9.99004e-06	9.94347e-06		3.93845e-06	3.45112e-06	3.51106e-06	3.49929e-06	3.4894e-06	3.50855e-06		3.57193e-06	3.47514e-06	3.45547e-06	3.51864e-06	3.5557e-06	3.57421e-06	3.7314e-06	3.60938e-06
62.0117	2.56278e-06	2.7627e-06	2.88401e-06	2.69868e-06	2.66875e-06	2.83462e-06	3.00405e-06	3.6892e-06	2.7958e-06	2.79596e-06	2.6847e-06	2.57187e-06	1.48517e-06	2.8631e-06	3.84072e-06	6.68427e-06		2.29778e-06	3.33554e-06	2.29968e-06	3.48482e-06	3.50283e-06	3.45041e-06	3.29788e-06	4.18568e-06	3.84745e-06	4.23773e-06	2.87664e-06	2.5184e-06	5.64559e-06	7.46393e-06	9.79954e-06	9.74894e-06		3.84724e-06	3.40053e-06	3.46497e-06	3.45354e-06	3.42873e-06	3.44255e-06		3.50872e-06	3.44746e-06	3.39546e-06	3.4698e-06	3.51143e-06	3.49774e-06	3.65812e-06	3.51262e-06
62.5	2.5378e-06	2.73338e-06	2.86597e-06	2.68868e-06	2.6556e-06	2.8607e-06	2.97507e-06	3.6771e-06	2.78385e-06	2.7687e-06	2.67199e-06	2.55496e-06	1.4224e-06	2.86717e-06	3.81754e-06	6.44628e-06		2.17516e-06	3.24304e-06	2.17472e-06	3.38199e-06	3.41154e-06	3.35593e-06	3.23549e-06	3.96309e-06	3.68845e-06	4.1025e-06	2.72234e-06	2.39287e-06	5.59739e-06	7.3629e-06	9.67972e-06	9.65718e-06		3.84775e-06	3.3829e-06	3.42557e-06	3.41332e-06	3.37425e-06	3.38848e-06		3.45194e-06	3.44573e-06	3.39712e-06	3.43653e-06	3.45484e-06	3.4418e-06	3.57072e-06	3.45003e-06
62.9883	2.48639e-06	2.69406e-06	2.81195e-06	2.66481e-06	2.62511e-06	2.83979e-06	2.91103e-06	3.58887e-06	2.75211e-06	2.74537e-06	2.6435e-06	2.50156e-06	1.35281e-06	2.82063e-06	3.84386e-06	6.20517e-06		2.11797e-06	3.16183e-06	2.10802e-06	3.35368e-06	3.37325e-06	3.31702e-06	3.229e-06	3.84178e-06	3.50609e-06	4.00564e-06	2.62285e-06	2.33116e-06	5.54682e-06	7.13079e-06	9.53907e-06	9.50585e-06		3.92012e-06	3.37638e-06	3.42282e-06	3.41295e-06	3.36818e-06	3.38027e-06		3.4437e-06	3.48508e-06	3.41138e-06	3.41591e-06	3.44748e-06	3.42775e-06	3.51618e-06	3.44165e-06
63.4766	2.48968e-06	2.66913e-06	2.7894e-06	2.63558e-06	2.60194e-06	2.809e-06	2.91153e-06	3.48582e-06	2.71443e-06	2.6732e-06	2.61105e-06	2.5098e-06	1.34112e-06	2.74901e-06	3.78762e-06	6.11672e-06		2.02232e-06	3.0707e-06	2.01523e-06	3.20756e-06	3.20501e-06	3.15325e-06	3.09346e-06	3.63898e-06	3.35335e-06	3.91569e-06	2.52679e-06	2.25622e-06	5.37563e-06	6.95398e-06	9.34788e-06	9.51104e-06		3.98249e-06	3.3899e-06	3.43635e-06	3.43129e-06	3.36063e-06	3.37589e-06		3.43399e-06	3.4913e-06	3.42034e-06	3.43544e-06	3.45943e-06	3.42657e-06	3.55726e-06	3.46391e-06
63.9648	2.44219e-06	2.6212e-06	2.74302e-06	2.56358e-06	2.53445e-06	2.75508e-06	2.87063e-06	3.48669e-06	2.66549e-06	2.60765e-06	2.52818e-06	2.46558e-06	1.27777e-06	2.68265e-06	3.66992e-06	5.92426e-06		1.9674e-06	3.0226e-06	1.97448e-06	3.12515e-06	3.11322e-06	3.07073e-06	2.95452e-06	3.534e-06	3.18374e-06	3.80138e-06	2.45859e-06	2.21083e-06	5.28366e-06	6.86932e-06	9.2704e-06	9.39695e-06		3.95732e-06	3.34679e-06	3.39367e-06	3.38852e-06	3.32321e-06	3.3361e-06		3.39673e-06	3.4064e-06	3.37144e-06	3.40524e-06	3.40565e-06	3.3875e-06	3.52082e-06	3.45889e-06
64.4531	2.40548e-06	2.57362e-06	2.68256e-06	2.49521e-06	2.46477e-06	2.6669e-06	2.80426e-06	3.43833e-06	2.63218e-06	2.55179e-06	2.48195e-06	2.42922e-06	1.2583e-06	2.58352e-06	3.58166e-06	5.91748e-06		1.94204e-06	2.9136e-06	1.95765e-06	3.12298e-06	3.10092e-06	3.06321e-06	2.93175e-06	3.66572e-06	3.17561e-06	3.75956e-06	2.4438e-06	2.18482e-06	5.25096e-06	6.77755e-06	9.30583e-06	9.32947e-06		3.83275e-06	3.24036e-06	3.27525e-06	3.27126e-06	3.18528e-06	3.19046e-06		3.25692e-06	3.26022e-06	3.23561e-06	3.28911e-06	3.27216e-06	3.24721e-06	3.40623e-06	3.33227e-06
64.9414	2.40142e-06	2.55679e-06	2.68644e-06	2.47264e-06	2.44397e-06	2.62702e-06	2.81845e-06	3.38329e-06	2.61721e-06	2.5274e-06	2.47419e-06	2.43206e-06	1.25026e-06	2.54689e-06	3.54052e-06	5.86021e-06		1.93055e-06	2.81682e-06	1.93229e-06	3.0818e-06	3.05861e-06	3.01111e-06	2.86508e-06	3.68178e-06	3.20706e-06	3.67185e-06	2.39444e-06	2.18017e-06	5.07015e-06	6.42464e-06	9.16705e-06	9.08079e-06		3.64643e-06	3.15589e-06	3.19536e-06	3.19172e-06	3.12189e-06	3.12552e-06		3.19448e-06	3.15194e-06	3.1387e-06	3.20121e-06	3.1711e-06	3.18409e-06	3.35098e-06	3.27052e-06
65.4297	2.33444e-06	2.51457e-06	2.62588e-06	2.41751e-06	2.38955e-06	2.55858e-06	2.74525e-06	3.36333e-06	2.5616e-06	2.45468e-06	2.39058e-06	2.35773e-06	1.20836e-06	2.46367e-06	3.46525e-06	5.76523e-06		1.9113e-06	2.70353e-06	1.91398e-06	3.00224e-06	2.99804e-06	2.96137e-06	2.79675e-06	3.72029e-06	3.23296e-06	3.56872e-06	2.32956e-06	2.13893e-06	4.99225e-06	6.2833e-06	8.94382e-06	8.74665e-06		3.5476e-06	3.12437e-06	3.17713e-06	3.16987e-06	3.07944e-06	3.07821e-06		3.14734e-06	3.10614e-06	3.07219e-06	3.14255e-06	3.12483e-06	3.13372e-06	3.31849e-06	3.20861e-06
65.918	2.30345e-06	2.48985e-06	2.60137e-06	2.377e-06	2.34373e-06	2.50812e-06	2.6975e-06	3.23656e-06	2.50788e-06	2.41665e-06	2.35088e-06	2.31961e-06	1.18397e-06	2.43691e-06	3.44334e-06	5.73365e-06		1.92282e-06	2.58064e-06	1.92267e-06	2.92443e-06	2.92642e-06	2.88597e-06	2.76633e-06	3.70147e-06	3.17793e-06	3.46445e-06	2.29244e-06	2.12421e-06	4.82673e-06	6.13812e-06	8.86379e-06	8.56535e-06		3.43871e-06	3.04219e-06	3.10575e-06	3.09777e-06	3.00758e-06	3.0124e-06		3.07168e-06	3.03926e-06	3.01701e-06	3.07932e-06	3.04144e-06	3.07501e-06	3.25704e-06	3.12751e-06
66.4062	2.2812e-06	2.46103e-06	2.58036e-06	2.36102e-06	2.32592e-06	2.48957e-06	2.67594e-06	3.13171e-06	2.43546e-06	2.35409e-06	2.29097e-06	2.28754e-06	1.18075e-06	2.41117e-06	3.39124e-06	5.63156e-06		1.90039e-06	2.5139e-06	1.88544e-06	2.80542e-06	2.81884e-06	2.77539e-06	2.67862e-06	3.62177e-06	3.01494e-06	3.36074e-06	2.23768e-06	2.06563e-06	4.5138e-06	5.84974e-06	8.53302e-06	8.25394e-06		3.4134e-06	3.02742e-06	3.07581e-06	3.06829e-06	2.98521e-06	2.99734e-06		3.05261e-06	3.05923e-06	3.03957e-06	3.07811e-06	3.06736e-06	3.06044e-06	3.26903e-06	3.10405e-06
66.8945	2.24484e-06	2.37568e-06	2.5067e-06	2.29182e-06	2.25839e-06	2.42577e-06	2.60737e-06	2.99776e-06	2.36913e-06	2.31559e-06	2.19784e-06	2.23439e-06	1.23894e-06	2.37357e-06	3.28886e-06	5.45789e-06		1.89201e-06	2.5071e-06	1.88561e-06	2.72291e-06	2.75588e-06	2.7246e-06	2.61258e-06	3.51574e-06	2.93736e-06	3.31507e-06	2.2394e-06	2.06839e-06	4.39192e-06	5.87849e-06	8.28843e-06	8.13146e-06		3.43329e-06	2.96992e-06	3.01511e-06	3.00892e-06	2.90767e-06	2.9292e-06		2.97261e-06	2.98657e-06	2.96693e-06	3.01713e-06	3.00888e-06	2.98762e-06	3.23517e-06	3.05688e-06
67.3828	2.24352e-06	2.34296e-06	2.50087e-06	2.25216e-06	2.22195e-06	2.39529e-06	2.5937e-06	2.89875e-06	2.34136e-06	2.30917e-06	2.15621e-06	2.22381e-06	1.25742e-06	2.35863e-06	3.19302e-06	5.26418e-06		1.90945e-06	2.55161e-06	1.89477e-06	2.65138e-06	2.67853e-06	2.66196e-06	2.6232e-06	3.48445e-06	2.88419e-06	3.26991e-06	2.2695e-06	2.05754e-06	4.38205e-06	6.06854e-06	8.3814e-06	7.94494e-06		3.42277e-06	2.85144e-06	2.88583e-06	2.88181e-06	2.78729e-06	2.80973e-06		2.85074e-06	2.885e-06	2.87827e-06	2.93375e-06	2.89653e-06	2.85815e-06	3.13873e-06	2.97917e-06
67.8711	2.17753e-06	2.31094e-06	2.46431e-06	2.21922e-06	2.19332e-06	2.36981e-06	2.54613e-06	2.83176e-06	2.30062e-06	2.25651e-06	2.09039e-06	2.15973e-06	1.23733e-06	2.30963e-06	3.10304e-06	5.16835e-06		1.8647e-06	2.57195e-06	1.84895e-06	2.56286e-06	2.57916e-06	2.56747e-06	2.5715e-06	3.46571e-06	2.77768e-06	3.20102e-06	2.22358e-06	2.02567e-06	4.53443e-06	6.08574e-06	8.30395e-06	7.7357e-06		3.37824e-06	2.77383e-06	2.81628e-06	2.81182e-06	2.72937e-06	2.74728e-06		2.79615e-06	2.86274e-06	2.84559e-06	2.90104e-06	2.83539e-06	2.78698e-06	3.09061e-06	2.96126e-06
68.3594	2.14896e-06	2.2657e-06	2.40891e-06	2.17215e-06	2.15235e-06	2.32841e-06	2.4886e-06	2.78723e-06	2.25595e-06	2.23128e-06	2.02238e-06	2.13368e-06	1.18113e-06	2.26098e-06	3.03266e-06	4.98503e-06		1.78914e-06	2.56591e-06	1.77205e-06	2.47098e-06	2.4787e-06	2.47543e-06	2.50391e-06	3.33143e-06	2.70802e-06	3.12045e-06	2.19345e-06	1.95928e-06	4.62593e-06	6.0119e-06	8.0514e-06	7.58435e-06		3.39364e-06	2.75538e-06	2.80301e-06	2.79749e-06	2.71379e-06	2.72821e-06		2.78193e-06	2.84315e-06	2.80544e-06	2.86055e-06	2.81308e-06	2.76451e-06	3.04086e-06	2.93467e-06
68.8477	2.14419e-06	2.28862e-06	2.42174e-06	2.18421e-06	2.16654e-06	2.34991e-06	2.49454e-06	2.85647e-06	2.22634e-06	2.22824e-06	2.05856e-06	2.12922e-06	1.11436e-06	2.25569e-06	3.0862e-06	4.97092e-06		1.68121e-06	2.51186e-06	1.66205e-06	2.32729e-06	2.32331e-06	2.31627e-06	2.37789e-06	3.17749e-06	2.61599e-06	2.99173e-06	2.14675e-06	1.83243e-06	4.60326e-06	5.89786e-06	7.93199e-06	7.3729e-06		3.21502e-06	2.64371e-06	2.67935e-06	2.67273e-06	2.59986e-06	2.60777e-06		2.66801e-06	2.72145e-06	2.67018e-06	2.71036e-06	2.67382e-06	2.64342e-06	2.86077e-06	2.80008e-06
69.3359	2.0554e-06	2.22782e-06	2.33822e-06	2.12918e-06	2.10982e-06	2.28911e-06	2.40633e-06	2.81783e-06	2.13733e-06	2.15466e-06	2.01145e-06	2.03997e-06	1.1142e-06	2.18242e-06	3.01675e-06	4.86003e-06		1.62578e-06	2.45911e-06	1.62305e-06	2.2702e-06	2.27489e-06	2.26306e-06	2.32396e-06	3.10967e-06	2.48305e-06	2.88359e-06	2.05963e-06	1.78109e-06	4.52445e-06	5.78856e-06	7.81349e-06	7.13682e-06		3.02712e-06	2.57682e-06	2.616e-06	2.60934e-06	2.55634e-06	2.56717e-06		2.62573e-06	2.70041e-06	2.64786e-06	2.6926e-06	2.64578e-06	2.60433e-06	2.82256e-06	2.77012e-06
69.8242	2.02086e-06	2.1688e-06	2.26451e-06	2.06599e-06	2.04888e-06	2.21511e-06	2.35916e-06	2.76408e-06	2.0986e-06	2.13014e-06	1.99952e-06	2.00598e-06	1.08561e-06	2.14522e-06	3.00723e-06	4.766e-06		1.56619e-06	2.33238e-06	1.58351e-06	2.2181e-06	2.22826e-06	2.20875e-06	2.22855e-06	2.99553e-06	2.38214e-06	2.7906e-06	1.98104e-06	1.70052e-06	4.37019e-06	5.60337e-06	7.61342e-06	6.86735e-06		2.87522e-06	2.48219e-06	2.52836e-06	2.52122e-06	2.45086e-06	2.46614e-06		2.51697e-06	2.56333e-06	2.51237e-06	2.55895e-06	2.54608e-06	2.50669e-06	2.65896e-06	2.59578e-06
70.3125	1.98251e-06	2.12294e-06	2.21517e-06	2.0341e-06	2.01756e-06	2.17396e-06	2.32465e-06	2.74341e-06	2.08045e-06	2.07811e-06	1.98157e-06	1.97109e-06	1.04668e-06	2.10028e-06	2.9738e-06	4.75062e-06		1.53496e-06	2.22124e-06	1.55015e-06	2.19233e-06	2.20202e-06	2.18478e-06	2.18003e-06	2.94504e-06	2.36421e-06	2.71672e-06	1.92136e-06	1.64055e-06	4.30901e-06	5.56983e-06	7.64426e-06	6.81791e-06		2.72974e-06	2.35536e-06	2.39856e-06	2.39281e-06	2.32304e-06	2.33553e-06		2.38088e-06	2.43261e-06	2.37751e-06	2.43811e-06	2.40836e-06	2.37361e-06	2.50717e-06	2.46471e-06
70.8008	1.93573e-06	2.04342e-06	2.14023e-06	1.96686e-06	1.94881e-06	2.10139e-06	2.2522e-06	2.6636e-06	2.04575e-06	2.01214e-06	1.93631e-06	1.92231e-06	9.9918e-07	2.06667e-06	2.84003e-06	4.60966e-06		1.53663e-06	2.15901e-06	1.5544e-06	2.16533e-06	2.177e-06	2.16282e-06	2.17902e-06	2.87823e-06	2.324e-06	2.66296e-06	1.86963e-06	1.62103e-06	4.15554e-06	5.32067e-06	7.51874e-06	6.87177e-06		2.61819e-06	2.31583e-06	2.36718e-06	2.36398e-06	2.30104e-06	2.31053e-06		2.35105e-06	2.39946e-06	2.35355e-06	2.43485e-06	2.39571e-06	2.34506e-06	2.52182e-06	2.47588e-06
71.2891	1.89317e-06	1.99178e-06	2.08517e-06	1.92214e-06	1.90597e-06	2.05341e-06	2.20446e-06	2.61205e-06	2.01604e-06	1.95176e-06	1.87137e-06	1.88418e-06	9.4139e-07	2.00998e-06	2.7412e-06	4.47868e-06		1.51251e-06	2.10999e-06	1.51878e-06	2.14165e-06	2.14579e-06	2.13511e-06	2.1678e-06	2.82294e-06	2.27063e-06	2.57281e-06	1.8139e-06	1.5746e-06	3.94059e-06	5.17238e-06	7.17852e-06	6.76635e-06		2.63203e-06	2.27911e-06	2.32752e-06	2.32347e-06	2.27742e-06	2.28943e-06		2.32738e-06	2.35546e-06	2.31319e-06	2.40313e-06	2.37404e-06	2.32053e-06	2.49707e-06	2.44188e-06
71.7773	1.84726e-06	1.94188e-06	2.04865e-06	1.88166e-06	1.87085e-06	2.01803e-06	2.18704e-06	2.54795e-06	1.99018e-06	1.87332e-06	1.84397e-06	1.84327e-06	9.3476e-07	1.96384e-06	2.686e-06	4.48036e-06		1.48844e-06	2.05238e-06	1.47039e-06	2.10336e-06	2.10185e-06	2.09286e-06	2.15837e-06	2.76519e-06	2.252e-06	2.56468e-06	1.81895e-06	1.571e-06	3.79444e-06	5.10009e-06	7.06165e-06	6.72e-06		2.6639e-06	2.26599e-06	2.30419e-06	2.29942e-06	2.27418e-06	2.28746e-06		2.32602e-06	2.34296e-06	2.29665e-06	2.39334e-06	2.37673e-06	2.32204e-06	2.52484e-06	2.45451e-06
72.2656	1.80056e-06	1.89935e-06	2.00188e-06	1.85261e-06	1.84368e-06	1.97723e-06	2.13406e-06	2.46556e-06	1.93235e-06	1.82513e-06	1.8064e-06	1.79151e-06	9.1781e-07	1.93675e-06	2.64845e-06	4.38366e-06		1.48277e-06	1.99685e-06	1.45637e-06	2.05853e-06	2.0609e-06	2.04673e-06	2.1263e-06	2.65977e-06	2.21305e-06	2.51171e-06	1.79689e-06	1.56999e-06	3.59118e-06	4.87425e-06	6.74402e-06	6.53581e-06		2.65765e-06	2.24594e-06	2.26665e-06	2.26196e-06	2.24613e-06	2.26176e-06		2.30365e-06	2.31033e-06	2.25958e-06	2.3508e-06	2.36413e-06	2.29886e-06	2.54696e-06	2.48027e-06
72.7539	1.73852e-06	1.8511e-06	1.94065e-06	1.80659e-06	1.79782e-06	1.91619e-06	2.06059e-06	2.36151e-06	1.88334e-06	1.78346e-06	1.75854e-06	1.73768e-06	9.0262e-07	1.87871e-06	2.58048e-06	4.24779e-06		1.45273e-06	1.9674e-06	1.42465e-06	2.02323e-06	2.02348e-06	2.00257e-06	2.10516e-06	2.6457e-06	2.113e-06	2.4475e-06	1.74629e-06	1.54934e-06	3.49304e-06	4.75318e-06	6.41531e-06	6.29973e-06		2.6413e-06	2.23622e-06	2.23678e-06	2.231e-06	2.24035e-06	2.24828e-06		2.29841e-06	2.26729e-06	2.23139e-06	2.30218e-06	2.3399e-06	2.28819e-06	2.5187e-06	2.45531e-06
73.2422	1.72256e-06	1.81827e-06	1.89782e-06	1.77613e-06	1.76832e-06	1.86501e-06	2.01702e-06	2.30619e-06	1.88596e-06	1.7798e-06	1.76142e-06	1.7227e-06	9.0973e-07	1.87246e-06	2.55655e-06	4.19955e-06		1.41206e-06	1.93884e-06	1.40083e-06	1.9727e-06	1.97264e-06	1.95227e-06	2.03406e-06	2.6182e-06	2.04649e-06	2.42338e-06	1.7257e-06	1.5378e-06	3.48741e-06	4.66271e-06	6.25206e-06	6.21881e-06		2.59526e-06	2.22635e-06	2.23126e-06	2.2251e-06	2.21951e-06	2.22247e-06		2.2746e-06	2.23602e-06	2.2173e-06	2.28965e-06	2.31171e-06	2.26412e-06	2.49449e-06	2.42614e-06
73.7305	1.66003e-06	1.7544e-06	1.82338e-06	1.70934e-06	1.70417e-06	1.79353e-06	1.92968e-06	2.23902e-06	1.80597e-06	1.73411e-06	1.71464e-06	1.65146e-06	8.6839e-07	1.80653e-06	2.45916e-06	4.05217e-06		1.34094e-06	1.89022e-06	1.32678e-06	1.87304e-06	1.87817e-06	1.85133e-06	1.92187e-06	2.51769e-06	1.98606e-06	2.39495e-06	1.64604e-06	1.47473e-06	3.37683e-06	4.51233e-06	6.00336e-06	6.09027e-06		2.58867e-06	2.18817e-06	2.17976e-06	2.17453e-06	2.17483e-06	2.1716e-06		2.22417e-06	2.19234e-06	2.19041e-06	2.24639e-06	2.25527e-06	2.20969e-06	2.43896e-06	2.37887e-06
74.2188	1.63195e-06	1.71651e-06	1.77979e-06	1.68967e-06	1.68355e-06	1.76946e-06	1.88442e-06	2.23061e-06	1.76163e-06	1.69595e-06	1.69366e-06	1.62842e-06	8.3698e-07	1.75746e-06	2.37798e-06	3.86499e-06		1.27681e-06	1.85788e-06	1.25178e-06	1.79964e-06	1.80931e-06	1.78784e-06	1.86306e-06	2.41829e-06	1.91411e-06	2.33957e-06	1.59342e-06	1.40995e-06	3.32515e-06	4.6917e-06	6.02173e-06	6.14213e-06		2.52471e-06	2.12477e-06	2.11474e-06	2.10724e-06	2.12059e-06	2.12114e-06		2.16414e-06	2.14341e-06	2.15594e-06	2.21362e-06	2.19797e-06	2.15566e-06	2.35956e-06	2.31239e-06
74.707	1.60738e-06	1.67782e-06	1.75178e-06	1.67176e-06	1.66679e-06	1.74438e-06	1.86528e-06	2.18232e-06	1.70971e-06	1.66313e-06	1.6772e-06	1.60442e-06	8.3371e-07	1.70296e-06	2.33672e-06	3.80445e-06		1.23425e-06	1.82935e-06	1.20169e-06	1.73679e-06	1.74712e-06	1.729e-06	1.78471e-06	2.38514e-06	1.9309e-06	2.34309e-06	1.59582e-06	1.38274e-06	3.27076e-06	4.7214e-06	5.96799e-06	6.16523e-06		2.48218e-06	2.06108e-06	2.05186e-06	2.04662e-06	2.03505e-06	2.04554e-06		2.07475e-06	2.06973e-06	2.08719e-06	2.15026e-06	2.10923e-06	2.07595e-06	2.27533e-06	2.20334e-06
75.1953	1.56192e-06	1.66118e-06	1.72428e-06	1.65662e-06	1.65173e-06	1.72113e-06	1.83268e-06	2.17477e-06	1.64022e-06	1.62846e-06	1.6432e-06	1.56175e-06	8.1934e-07	1.67682e-06	2.3409e-06	3.74827e-06		1.1864e-06	1.75874e-06	1.13548e-06	1.64539e-06	1.66479e-06	1.64906e-06	1.70893e-06	2.34055e-06	1.92922e-06	2.2863e-06	1.54977e-06	1.3097e-06	3.14685e-06	4.67488e-06	5.91295e-06	6.10424e-06		2.38345e-06	1.95618e-06	1.95322e-06	1.94953e-06	1.94023e-06	1.96154e-06		1.98056e-06	1.97738e-06	1.97714e-06	2.04548e-06	2.0064e-06	1.99164e-06	2.1743e-06	2.09123e-06
75.6836	1.50138e-06	1.62603e-06	1.67982e-06	1.6183e-06	1.61383e-06	1.68279e-06	1.79381e-06	2.13922e-06	1.57425e-06	1.57979e-06	1.6e-06	1.50851e-06	8.002e-07	1.61941e-06	2.27935e-06	3.62288e-06		1.15503e-06	1.72927e-06	1.10557e-06	1.61079e-06	1.63333e-06	1.61736e-06	1.68929e-06	2.3154e-06	1.90571e-06	2.19051e-06	1.52453e-06	1.27221e-06	3.10371e-06	4.56573e-06	5.77301e-06	5.97559e-06		2.26138e-06	1.8632e-06	1.88227e-06	1.87756e-06	1.86679e-06	1.89231e-06		1.90501e-06	1.89903e-06	1.89126e-06	1.98325e-06	1.93263e-06	1.92483e-06	2.10849e-06	2.01561e-06
76.1719	1.47542e-06	1.60033e-06	1.66176e-06	1.576e-06	1.57276e-06	1.65948e-06	1.77131e-06	2.09822e-06	1.52884e-06	1.56005e-06	1.56966e-06	1.48357e-06	8.1172e-07	1.58035e-06	2.24588e-06	3.59308e-06		1.12137e-06	1.69261e-06	1.09115e-06	1.57881e-06	1.59112e-06	1.57756e-06	1.65976e-06	2.28502e-06	1.85346e-06	2.09909e-06	1.45924e-06	1.22915e-06	3.14074e-06	4.34559e-06	5.60409e-06	5.7992e-06		2.14249e-06	1.79125e-06	1.8166e-06	1.81276e-06	1.7889e-06	1.81259e-06		1.83058e-06	1.80064e-06	1.80935e-06	1.90052e-06	1.84386e-06	1.84652e-06	2.0339e-06	1.97262e-06
76.6602	1.45286e-06	1.56533e-06	1.62381e-06	1.52207e-06	1.51763e-06	1.6055e-06	1.72851e-06	2.06308e-06	1.48021e-06	1.51805e-06	1.51888e-06	1.46495e-06	8.1614e-07	1.56171e-06	2.19213e-06	3.61129e-06		1.09377e-06	1.64212e-06	1.07662e-06	1.5518e-06	1.55491e-06	1.53896e-06	1.61005e-06	2.24221e-06	1.82295e-06	1.99988e-06	1.39549e-06	1.17711e-06	3.08134e-06	4.14863e-06	5.62994e-06	5.66598e-06		2.12085e-06	1.77159e-06	1.81215e-06	1.80732e-06	1.77472e-06	1.79385e-06		1.81292e-06	1.78879e-06	1.78587e-06	1.87037e-06	1.83186e-06	1.82682e-06	1.97001e-06	1.9258e-06
77.1484	1.42222e-06	1.52844e-06	1.58534e-06	1.461e-06	1.45636e-06	1.54523e-06	1.68083e-06	2.00432e-06	1.42838e-06	1.48001e-06	1.50278e-06	1.43412e-06	8.0696e-07	1.51728e-06	2.11485e-06	3.52784e-06		1.05922e-06	1.61091e-06	1.03942e-06	1.51957e-06	1.51085e-06	1.49592e-06	1.60838e-06	2.17659e-06	1.72059e-06	1.89699e-06	1.3263e-06	1.13959e-06	3.00355e-06	4.05201e-06	5.53525e-06	5.39936e-06		2.04392e-06	1.7138e-06	1.75115e-06	1.74579e-06	1.71196e-06	1.72249e-06		1.75048e-06	1.74159e-06	1.73581e-06	1.82521e-06	1.77139e-06	1.75198e-06	1.90753e-06	1.8728e-06
77.6367	1.38289e-06	1.48551e-06	1.54504e-06	1.4076e-06	1.40193e-06	1.49706e-06	1.63338e-06	1.93675e-06	1.36983e-06	1.42809e-06	1.45356e-06	1.3901e-06	7.5929e-07	1.46736e-06	2.0545e-06	3.42896e-06		1.04669e-06	1.54459e-06	1.03441e-06	1.49494e-06	1.4809e-06	1.46375e-06	1.58183e-06	2.15361e-06	1.63941e-06	1.82483e-06	1.28796e-06	1.13611e-06	2.8581e-06	3.98373e-06	5.50159e-06	5.22594e-06		1.97122e-06	1.6802e-06	1.714e-06	1.7097e-06	1.67615e-06	1.68866e-06		1.71701e-06	1.70108e-06	1.69668e-06	1.78652e-06	1.73933e-06	1.71879e-06	1.8659e-06	1.83696e-06
78.125	1.35366e-06	1.45407e-06	1.51437e-06	1.37766e-06	1.37196e-06	1.46541e-06	1.59274e-06	1.90274e-06	1.34496e-06	1.39692e-06	1.42068e-06	1.35914e-06	7.1738e-07	1.44258e-06	2.00474e-06	3.31038e-06		1.01094e-06	1.49082e-06	1.00418e-06	1.42477e-06	1.41323e-06	1.40323e-06	1.5309e-06	2.11078e-06	1.57037e-06	1.75512e-06	1.24931e-06	1.09847e-06	2.73877e-06	3.83664e-06	5.33888e-06	4.98146e-06		1.93405e-06	1.65073e-06	1.67443e-06	1.67068e-06	1.63236e-06	1.64061e-06		1.67302e-06	1.65398e-06	1.64737e-06	1.73852e-06	1.69596e-06	1.67179e-06	1.80815e-06	1.73989e-06
78.6133	1.29993e-06	1.41097e-06	1.46064e-06	1.33702e-06	1.33385e-06	1.42912e-06	1.52656e-06	1.86464e-06	1.30561e-06	1.34399e-06	1.37338e-06	1.30337e-06	7.1253e-07	1.38386e-06	1.93861e-06	3.19341e-06		9.8661e-07	1.41774e-06	9.6664e-07	1.38606e-06	1.37899e-06	1.36978e-06	1.49534e-06	2.03099e-06	1.51542e-06	1.71995e-06	1.21992e-06	1.07737e-06	2.57676e-06	3.64922e-06	5.08678e-06	4.695e-06		1.83929e-06	1.60772e-06	1.63211e-06	1.62875e-06	1.59334e-06	1.60101e-06		1.63033e-06	1.61799e-06	1.6057e-06	1.70072e-06	1.65238e-06	1.63148e-06	1.75323e-06	1.68857e-06
79.1016	1.24945e-06	1.33732e-06	1.3981e-06	1.29367e-06	1.29149e-06	1.39525e-06	1.46573e-06	1.8107e-06	1.25874e-06	1.2952e-06	1.3234e-06	1.25358e-06	6.7342e-07	1.32797e-06	1.84745e-06	3.10874e-06		9.6581e-07	1.35789e-06	9.5058e-07	1.32817e-06	1.33669e-06	1.32781e-06	1.45302e-06	1.97669e-06	1.4779e-06	1.68544e-06	1.20283e-06	1.05346e-06	2.55546e-06	3.50598e-06	4.98377e-06	4.53842e-06		1.7182e-06	1.50037e-06	1.51684e-06	1.51355e-06	1.48878e-06	1.49897e-06		1.52363e-06	1.5109e-06	1.50028e-06	1.59203e-06	1.55194e-06	1.52237e-06	1.66797e-06	1.59747e-06
79.5898	1.2167e-06	1.2835e-06	1.34207e-06	1.24275e-06	1.24149e-06	1.35247e-06	1.41626e-06	1.75832e-06	1.2425e-06	1.26277e-06	1.2818e-06	1.22676e-06	6.4484e-07	1.28732e-06	1.79685e-06	3.01986e-06		9.3266e-07	1.32789e-06	9.1834e-07	1.28452e-06	1.28967e-06	1.28505e-06	1.39427e-06	1.88899e-06	1.47422e-06	1.69953e-06	1.17735e-06	1.00565e-06	2.56675e-06	3.35648e-06	4.78612e-06	4.375e-06		1.62094e-06	1.43201e-06	1.44823e-06	1.4449e-06	1.41039e-06	1.42069e-06		1.43894e-06	1.41625e-06	1.42092e-06	1.50819e-06	1.48294e-06	1.44416e-06	1.57745e-06	1.52176e-06
80.0781	1.17981e-06	1.24118e-06	1.29645e-06	1.20599e-06	1.20436e-06	1.31806e-06	1.37346e-06	1.72019e-06	1.2027e-06	1.21498e-06	1.2298e-06	1.19331e-06	6.05e-07	1.24988e-06	1.75903e-06	2.93588e-06		9.005e-07	1.26059e-06	8.7526e-07	1.23193e-06	1.24289e-06	1.23743e-06	1.34665e-06	1.79366e-06	1.42432e-06	1.69498e-06	1.143e-06	9.6054e-07	2.53704e-06	3.31879e-06	4.65175e-06	4.3255e-06		1.49806e-06	1.36043e-06	1.37451e-06	1.37133e-06	1.33041e-06	1.3388e-06		1.35222e-06	1.33872e-06	1.34312e-06	1.42852e-06	1.40829e-06	1.36033e-06	1.49477e-06	1.44791e-06
80.5664	1.16348e-06	1.20605e-06	1.26394e-06	1.17428e-06	1.17318e-06	1.28603e-06	1.33751e-06	1.66705e-06	1.17841e-06	1.18238e-06	1.1959e-06	1.17315e-06	5.8489e-07	1.21647e-06	1.7188e-06	2.87911e-06		8.788e-07	1.21116e-06	8.4254e-07	1.16629e-06	1.17581e-06	1.16366e-06	1.30024e-06	1.74422e-06	1.34813e-06	1.64475e-06	1.15861e-06	9.3361e-07	2.57152e-06	3.27583e-06	4.52169e-06	4.31079e-06		1.45297e-06	1.30798e-06	1.32281e-06	1.32021e-06	1.28208e-06	1.28675e-06		1.30276e-06	1.27935e-06	1.29074e-06	1.36125e-06	1.35837e-06	1.30636e-06	1.44405e-06	1.38522e-06
81.0547	1.12048e-06	1.16055e-06	1.20479e-06	1.11456e-06	1.11364e-06	1.22308e-06	1.2769e-06	1.60766e-06	1.15072e-06	1.14767e-06	1.15366e-06	1.12478e-06	5.63e-07	1.18786e-06	1.66949e-06	2.8305e-06		8.416e-07	1.19193e-06	8.0158e-07	1.12485e-06	1.12968e-06	1.11856e-06	1.24485e-06	1.66874e-06	1.29578e-06	1.59187e-06	1.1001e-06	8.9832e-07	2.53676e-06	3.2195e-06	4.36067e-06	4.30339e-06		1.45199e-06	1.27975e-06	1.29274e-06	1.28887e-06	1.24675e-06	1.25504e-06		1.27362e-06	1.24194e-06	1.26249e-06	1.33099e-06	1.31405e-06	1.27764e-06	1.41217e-06	1.34862e-06
81.543	1.07884e-06	1.1331e-06	1.17561e-06	1.07527e-06	1.07605e-06	1.1803e-06	1.23302e-06	1.57712e-06	1.11142e-06	1.10783e-06	1.10791e-06	1.07886e-06	5.9812e-07	1.15827e-06	1.63507e-06	2.76303e-06		8.0434e-07	1.18058e-06	7.5731e-07	1.06834e-06	1.0781e-06	1.06601e-06	1.19244e-06	1.63942e-06	1.17961e-06	1.51542e-06	1.03129e-06	8.5823e-07	2.44462e-06	3.1487e-06	4.18371e-06	4.22943e-06		1.44971e-06	1.24985e-06	1.25118e-06	1.24561e-06	1.19983e-06	1.20635e-06		1.22875e-06	1.20127e-06	1.21455e-06	1.27151e-06	1.24793e-06	1.22684e-06	1.34323e-06	1.26854e-06
82.0312	1.06116e-06	1.11117e-06	1.15433e-06	1.04649e-06	1.04832e-06	1.14588e-06	1.21453e-06	1.53047e-06	1.08005e-06	1.08056e-06	1.0874e-06	1.05677e-06	5.9869e-07	1.12476e-06	1.5697e-06	2.74472e-06		7.9174e-07	1.19671e-06	7.3847e-07	1.01652e-06	1.02084e-06	1.01611e-06	1.16905e-06	1.60411e-06	1.11613e-06	1.42928e-06	1.00516e-06	8.4377e-07	2.41921e-06	3.06865e-06	4.05682e-06	4.05421e-06		1.47994e-06	1.21748e-06	1.22017e-06	1.21468e-06	1.17469e-06	1.18328e-06		1.20628e-06	1.18789e-06	1.1977e-06	1.24662e-06	1.22656e-06	1.20052e-06	1.32924e-06	1.25172e-06
82.5195	1.00954e-06	1.06786e-06	1.10233e-06	9.9105e-07	9.9041e-07	1.08101e-06	1.1641e-06	1.45984e-06	1.03623e-06	1.03852e-06	1.03617e-06	1.00399e-06	5.8916e-07	1.08739e-06	1.51346e-06	2.60486e-06		7.5909e-07	1.17394e-06	7.1157e-07	9.9619e-07	9.9562e-07	9.9188e-07	1.14033e-06	1.57646e-06	1.08454e-06	1.36472e-06	9.3255e-07	8.1828e-07	2.28781e-06	2.98295e-06	3.94458e-06	3.88744e-06		1.44911e-06	1.18302e-06	1.19071e-06	1.18513e-06	1.1433e-06	1.15172e-06		1.17772e-06	1.16772e-06	1.16242e-06	1.20342e-06	1.19255e-06	1.16631e-06	1.2875e-06	1.21682e-06
83.0078	9.6642e-07	1.03587e-06	1.06888e-06	9.6242e-07	9.6059e-07	1.0503e-06	1.12443e-06	1.42351e-06	9.8366e-07	9.899e-07	9.9583e-07	9.6192e-07	5.5954e-07	1.05026e-06	1.45714e-06	2.48457e-06		7.3586e-07	1.13985e-06	6.9993e-07	9.6772e-07	9.7052e-07	9.6914e-07	1.0911e-06	1.54878e-06	1.05064e-06	1.32292e-06	9.019e-07	8.097e-07	2.16995e-06	2.81256e-06	3.88849e-06	3.64511e-06		1.39593e-06	1.14342e-06	1.14674e-06	1.14138e-06	1.10451e-06	1.1146e-06		1.13598e-06	1.1389e-06	1.12496e-06	1.15726e-06	1.15401e-06	1.12995e-06	1.24538e-06	1.17778e-06
83.4961	9.3159e-07	1.00793e-06	1.03796e-06	9.4144e-07	9.3415e-07	1.01848e-06	1.08642e-06	1.34524e-06	9.61e-07	9.6175e-07	9.6622e-07	9.2581e-07	5.2118e-07	1.01952e-06	1.40308e-06	2.40338e-06		7.0947e-07	1.07658e-06	6.799e-07	9.3526e-07	9.4048e-07	9.3672e-07	1.05155e-06	1.51521e-06	1.03018e-06	1.30228e-06	8.6167e-07	7.7791e-07	2.08983e-06	2.75697e-06	3.88986e-06	3.50704e-06		1.32875e-06	1.09179e-06	1.10498e-06	1.10082e-06	1.0685e-06	1.07931e-06		1.10128e-06	1.09987e-06	1.08799e-06	1.12594e-06	1.12423e-06	1.09378e-06	1.20953e-06	1.15368e-06
83.9844	9.0981e-07	9.6528e-07	9.9969e-07	9.0775e-07	8.994e-07	9.9193e-07	1.04929e-06	1.29697e-06	9.2814e-07	9.2866e-07	9.3075e-07	9.053e-07	5.164e-07	9.9395e-07	1.36859e-06	2.31071e-06		6.7614e-07	9.9075e-07	6.5427e-07	9.0244e-07	9.1256e-07	9.0756e-07	1.00618e-06	1.48545e-06	1.04447e-06	1.2722e-06	8.4059e-07	7.3872e-07	1.98978e-06	2.67902e-06	3.775e-06	3.36753e-06		1.25988e-06	1.04723e-06	1.06847e-06	1.06437e-06	1.02966e-06	1.03869e-06		1.06149e-06	1.07045e-06	1.05455e-06	1.08353e-06	1.08911e-06	1.05622e-06	1.17671e-06	1.1187e-06
84.4727	8.7648e-07	9.412e-07	9.7693e-07	8.9424e-07	8.8579e-07	9.8355e-07	1.02515e-06	1.26707e-06	8.9442e-07	9.0098e-07	9.0116e-07	8.7281e-07	4.9606e-07	9.8259e-07	1.36558e-06	2.25269e-06		6.5191e-07	9.5016e-07	6.2833e-07	8.7088e-07	8.8826e-07	8.7814e-07	9.6193e-07	1.4669e-06	1.03312e-06	1.2367e-06	8.2984e-07	7.1236e-07	1.92333e-06	2.58069e-06	3.66992e-06	3.31832e-06		1.21204e-06	1.009e-06	1.03764e-06	1.03434e-06	9.9352e-07	1.00105e-06		1.02419e-06	1.03813e-06	1.01959e-06	1.05019e-06	1.05469e-06	1.0211e-06	1.1522e-06	1.0894e-06
84.9609	8.5716e-07	9.0588e-07	9.4539e-07	8.6436e-07	8.558e-07	9.575e-07	9.9951e-07	1.24585e-06	8.6217e-07	8.6828e-07	8.6515e-07	8.5785e-07	4.7307e-07	9.6103e-07	1.31443e-06	2.19919e-06		6.3141e-07	9.1106e-07	6.0762e-07	8.3204e-07	8.4796e-07	8.3484e-07	9.3161e-07	1.42013e-06	9.9213e-07	1.20692e-06	7.8559e-07	6.7259e-07	1.88329e-06	2.58357e-06	3.57179e-06	3.20949e-06		1.19393e-06	9.8991e-07	1.02156e-06	1.01832e-06	9.7816e-07	9.8267e-07		1.01112e-06	1.02268e-06	1.00897e-06	1.0388e-06	1.03635e-06	1.00205e-06	1.14539e-06	1.08688e-06
85.4492	8.4046e-07	8.8551e-07	9.2181e-07	8.3871e-07	8.3073e-07	9.311e-07	9.774e-07	1.23106e-06	8.3683e-07	8.4875e-07	8.4179e-07	8.4508e-07	4.8092e-07	9.3558e-07	1.27974e-06	2.11154e-06		6.128e-07	8.9564e-07	5.9837e-07	8.1099e-07	8.202e-07	8.0949e-07	9.055e-07	1.38542e-06	9.7159e-07	1.18603e-06	7.6934e-07	6.6219e-07	1.84784e-06	2.54557e-06	3.45242e-06	3.05521e-06		1.15749e-06	9.5993e-07	9.9428e-07	9.9183e-07	9.5209e-07	9.5518e-07		9.8504e-07	9.8473e-07	9.7516e-07	1.00496e-06	1.00783e-06	9.7475e-07	1.13098e-06	1.05649e-06
85.9375	8.0573e-07	8.5467e-07	8.862e-07	8.1105e-07	8.0303e-07	8.9227e-07	9.4006e-07	1.20743e-06	7.9979e-07	8.2544e-07	8.1245e-07	8.1248e-07	4.7701e-07	9.1443e-07	1.25318e-06	2.07189e-06		5.9476e-07	8.5579e-07	5.7856e-07	7.7765e-07	7.8579e-07	7.7787e-07	8.8892e-07	1.32812e-06	9.1953e-07	1.14565e-06	7.3529e-07	6.5436e-07	1.80379e-06	2.44242e-06	3.25906e-06	2.94862e-06		1.1595e-06	9.4757e-07	9.7602e-07	9.7356e-07	9.3076e-07	9.3544e-07		9.6365e-07	9.593e-07	9.4504e-07	9.723e-07	9.7862e-07	9.5263e-07	1.08771e-06	1.02973e-06
86.4258	7.8607e-07	8.2775e-07	8.6493e-07	7.8894e-07	7.7908e-07	8.5933e-07	9.2317e-07	1.19125e-06	7.7131e-07	8.0367e-07	7.8448e-07	7.9739e-07	4.5919e-07	8.9296e-07	1.20681e-06	2.04842e-06		5.724e-07	8.3715e-07	5.5259e-07	7.4241e-07	7.4475e-07	7.3952e-07	8.6583e-07	1.32454e-06	8.4287e-07	1.0909e-06	7.0467e-07	6.2642e-07	1.7732e-06	2.35085e-06	3.14473e-06	2.85789e-06		1.12392e-06	9.3588e-07	9.5327e-07	9.5099e-07	9.0743e-07	9.1331e-07		9.3991e-07	9.3795e-07	9.2648e-07	9.5423e-07	9.536e-07	9.2795e-07	1.05934e-06	1.00273e-06
86.9141	7.4933e-07	8.0415e-07	8.3546e-07	7.7719e-07	7.6439e-07	8.4305e-07	8.8776e-07	1.14168e-06	7.4996e-07	7.8167e-07	7.6572e-07	7.6295e-07	4.4011e-07	8.6517e-07	1.17107e-06	1.99085e-06		5.4771e-07	7.9688e-07	5.1919e-07	7.1529e-07	7.2056e-07	7.1296e-07	8.3974e-07	1.26557e-06	8.0481e-07	1.04691e-06	6.7856e-07	5.973e-07	1.66967e-06	2.23249e-06	2.98457e-06	2.62665e-06		1.07622e-06	9.0199e-07	9.1539e-07	9.1435e-07	8.7989e-07	8.845e-07		9.0867e-07	8.9953e-07	8.8865e-07	9.1617e-07	9.2023e-07	8.9615e-07	1.00193e-06	9.6235e-07
87.4023	7.2526e-07	7.824e-07	8.0574e-07	7.5919e-07	7.4651e-07	8.2319e-07	8.5861e-07	1.10876e-06	7.2671e-07	7.6367e-07	7.4327e-07	7.3897e-07	3.8538e-07	8.3709e-07	1.12206e-06	1.9406e-06		5.1625e-07	7.5608e-07	4.863e-07	6.9033e-07	6.9894e-07	6.9185e-07	8.1363e-07	1.22888e-06	7.6875e-07	1.00405e-06	6.5018e-07	5.5894e-07	1.58404e-06	2.09159e-06	2.84455e-06	2.48324e-06		1.04061e-06	8.598e-07	8.6533e-07	8.6401e-07	8.3723e-07	8.4055e-07		8.6119e-07	8.6005e-07	8.521e-07	8.8219e-07	8.7618e-07	8.4994e-07	9.564e-07	9.2927e-07
87.8906	7.0072e-07	7.5219e-07	7.711e-07	7.2998e-07	7.1887e-07	7.9657e-07	8.2153e-07	1.06635e-06	7.1305e-07	7.5973e-07	7.2676e-07	7.144e-07	3.5954e-07	7.9484e-07	1.06448e-06	1.88426e-06		4.875e-07	7.2636e-07	4.5973e-07	6.6195e-07	6.7322e-07	6.6045e-07	7.7096e-07	1.1779e-06	7.5408e-07	1.00027e-06	6.3355e-07	5.2499e-07	1.46433e-06	2.03493e-06	2.77714e-06	2.4192e-06		9.7346e-07	8.2002e-07	8.2261e-07	8.2112e-07	8.0419e-07	8.077e-07		8.2472e-07	8.3154e-07	8.304e-07	8.5732e-07	8.4439e-07	8.161e-07	9.1467e-07	8.9346e-07
88.3789	6.7646e-07	7.2574e-07	7.4282e-07	7.0201e-07	6.9327e-07	7.6634e-07	7.9117e-07	1.04032e-06	7.0075e-07	7.3691e-07	7.026e-07	6.8816e-07	3.5005e-07	7.7206e-07	1.0455e-06	1.84955e-06		4.6804e-07	7.0836e-07	4.4332e-07	6.3451e-07	6.4917e-07	6.3517e-07	7.229e-07	1.10086e-06	7.3887e-07	9.7495e-07	6.202e-07	5.0527e-07	1.45085e-06	1.98831e-06	2.73361e-06	2.42822e-06		9.3073e-07	7.7795e-07	7.8268e-07	7.8097e-07	7.7234e-07	7.7581e-07		7.9179e-07	8.0326e-07	7.9932e-07	8.2852e-07	8.1747e-07	7.8335e-07	8.8907e-07	8.6679e-07
88.8672	6.5289e-07	7.0013e-07	7.1408e-07	6.7985e-07	6.7057e-07	7.315e-07	7.6128e-07	9.9995e-07	6.7184e-07	7.0825e-07	6.7968e-07	6.6291e-07	3.4992e-07	7.3108e-07	9.9805e-07	1.79072e-06		4.4386e-07	6.778e-07	4.3066e-07	6.1155e-07	6.235e-07	6.0956e-07	6.9708e-07	1.0245e-06	7.3323e-07	9.6958e-07	6.0804e-07	4.8538e-07	1.44017e-06	1.95831e-06	2.64938e-06	2.49761e-06		8.826e-07	7.2485e-07	7.2928e-07	7.2707e-07	7.2683e-07	7.3e-07		7.4364e-07	7.575e-07	7.5947e-07	7.9484e-07	7.7388e-07	7.3791e-07	8.6131e-07	8.556e-07
89.3555	6.2916e-07	6.7788e-07	6.926e-07	6.5665e-07	6.4891e-07	6.9808e-07	7.4351e-07	9.6899e-07	6.6144e-07	6.9998e-07	6.6559e-07	6.4026e-07	3.5022e-07	7.0894e-07	9.7139e-07	1.7654e-06		4.3281e-07	6.6185e-07	4.2189e-07	5.9033e-07	5.9898e-07	5.8431e-07	6.7733e-07	9.8302e-07	7.1112e-07	9.2685e-07	5.9543e-07	4.8081e-07	1.38461e-06	1.89093e-06	2.61658e-06	2.45371e-06		8.4549e-07	6.8586e-07	6.9289e-07	6.9112e-07	6.894e-07	6.9097e-07		7.0444e-07	7.1535e-07	7.1508e-07	7.4427e-07	7.3999e-07	6.9913e-07	8.1087e-07	8.0256e-07
89.8438	6.0574e-07	6.4526e-07	6.6569e-07	6.317e-07	6.2315e-07	6.6782e-07	7.1911e-07	9.2355e-07	6.3107e-07	6.5431e-07	6.3375e-07	6.1695e-07	3.4162e-07	6.7496e-07	9.4581e-07	1.69538e-06		4.2762e-07	6.4488e-07	4.2047e-07	5.7226e-07	5.7909e-07	5.6635e-07	6.738e-07	9.7125e-07	6.8548e-07	8.716e-07	5.801e-07	4.7728e-07	1.32976e-06	1.8458e-06	2.561e-06	2.4579e-06		8.2877e-07	6.67e-07	6.7385e-07	6.7272e-07	6.6821e-07	6.686e-07		6.826e-07	6.8935e-07	6.9079e-07	7.1835e-07	7.1899e-07	6.7745e-07	7.8378e-07	7.7165e-07
90.332	5.8827e-07	6.2713e-07	6.486e-07	6.1968e-07	6.0965e-07	6.4794e-07	6.9411e-07	8.9156e-07	5.9669e-07	6.2183e-07	6.1098e-07	6.0105e-07	3.2411e-07	6.5222e-07	9.0152e-07	1.61458e-06		4.2222e-07	6.3368e-07	4.1685e-07	5.5574e-07	5.5833e-07	5.4697e-07	6.5975e-07	9.4008e-07	6.5501e-07	8.1666e-07	5.7494e-07	4.8077e-07	1.2877e-06	1.77851e-06	2.47534e-06	2.34067e-06		8.1158e-07	6.434e-07	6.4902e-07	6.4741e-07	6.4566e-07	6.4449e-07		6.5951e-07	6.5495e-07	6.6229e-07	6.9167e-07	6.9025e-07	6.5253e-07	7.592e-07	7.5336e-07
[truncated: 48 more columns]

## Sheet: Figure 4Dii
Vehicle
Time (sec)	Theta
-9	0.359353	-0.74299	0.011577	0.060124	-0.09287	0.401213	0.305059	-0.73606	0.425324	0.170968	-0.37272	0.433265	0.168318	-0.36804	0.487004	0.301098	-0.34526	0.451052	0.355119	-0.24499		-0.23326	-0.07715	0.484481	-0.33324	-0.68576	0.198297	0.020542	-0.46497	0.215009	0.225638	-0.68604	0.285134	0.40465	-0.81273	0.434037	1.94208	-0.01255	0.464081	-0.17377	0.064424	0.829471	-0.80045	0.07277	0.610678	-0.86842	-0.14863	0.499018
-7	0.066638	-0.43698	-0.51721	0.40632	-0.41736	-0.11113	0.147162	-0.4371	-0.07068	0.514016	-0.06266	-0.07456	0.517035	-0.04611	-0.2949	0.463141	-0.05458	-0.31843	0.025378	-0.37385		0.048895	-0.06374	-0.30593	-0.21193	0.182414	-0.47806	0.334183	0.731246	-0.23083	0.577554	-0.39349	-0.13461	0.083838	-0.4035	-0.34369	0.640791	0.185094	-0.35073	0.91801	-0.01662	-0.17428	0.194213	-0.23165	-0.20319	-0.19091	-0.4028	-0.36736
-5	-0.11681	-0.71983	0.060705	0.472199	-0.9406	0.297007	0.130918	-0.69876	0.265794	0.508142	-0.26632	0.27011	0.501664	-0.27798	0.027241	0.445593	-0.29706	-0.0033	0.059112	-0.72005		-0.03356	-0.74243	0.016684	-0.48168	-0.03808	0.162583	0.163495	0.023003	0.146202	0.162794	-0.78438	0.161801	-0.13122	-0.71281	0.045196	0.354855	-0.48283	-0.03391	0.061504	-0.05491	0.001973	-0.05036	-0.38395	-0.03582	-0.15215	0.129983	-0.04739
-3	0.747068	-1.19919	1.42088	1.41752	-1.25259	0.79744	1.08497	-1.17519	0.723503	1.35745	-0.92156	0.743498	1.35004	-0.91338	0.553324	1.18818	-0.92633	0.508506	0.394289	-0.84469		-0.56057	-0.8934	0.540085	-0.31032	-0.44447	1.25128	0.214353	-0.44989	0.987059	0.169843	-1.083	0.777784	0.709823	-1.26056	0.631174	-1.10235	-0.46471	0.512858	-0.62189	-0.70107	0.34769	-0.39227	-0.79596	0.36582	-0.05928	-0.64643	0.360204
-1	-1.38702	-0.0223	-1.51058	-1.3205	-0.28495	-1.79405	-1.35266	0.037433	-1.81923	-1.24467	-0.65522	-1.81295	-1.25369	-0.62015	-1.83506	-0.85636	-0.61677	-1.85674	-0.90427	0.087606		1.43462	1.14943	-1.83858	-1.49497	-1.59312	-1.6587	-1.88044	-1.5957	-1.74092	-1.89196	-0.0412	-1.8002	-1.41854	0.12254	-1.74576	-0.26115	0.062175	-1.84588	-0.14929	-0.0059	-1.85322	0.802907	0.516281	-1.88279	2.12152	0.192933	-1.81725
1	0.216248	1.0049	-0.76595	-0.83395	1.05985	-0.77042	-0.27564	1.04703	-0.76605	-0.93875	-0.60361	-0.76032	-0.95701	-0.60619	-0.53358	-0.66368	-0.6102	-0.51653	0.233379	-0.18782		1.28239	-0.33343	-0.53183	0.532897	-0.38646	-0.63535	-0.09657	-0.50541	-0.68896	-0.40447	1.00969	-0.73817	0.241687	1.00103	-0.5658	-1.05168	0.104568	-0.51359	-0.26154	0.19258	-0.69489	-0.53116	0.088612	-0.58207	0.427133	-0.00016	-0.75091
3	0.059563	-0.31433	0.423205	-0.43171	-0.147	0.532271	-0.28102	-0.37517	0.6007	-0.39328	0.053935	0.594767	-0.41658	0.047761	0.789212	-0.56457	0.020405	0.798099	-0.0875	-0.02319		-0.69568	-0.27732	0.788062	0.80991	-0.13059	0.455864	0.087242	-0.35476	0.518287	-0.07121	-0.29044	0.54368	0.078372	-0.23967	0.628605	-0.15232	-0.03659	0.818819	0.20805	0.113168	0.620773	-0.20951	0.441114	0.83859	-0.50375	0.460431	0.647092
5	-0.40874	0.145388	0.711973	-0.37553	0.155609	0.550382	-0.3459	0.076698	0.556351	-0.4091	0.576296	0.546618	-0.40726	0.565487	0.504	-0.47545	0.542255	0.455705	-0.44245	0.224028		-0.7576	0.270094	0.488588	0.330211	0.7402	0.459135	-0.15279	0.768148	0.534491	-0.06585	-0.05389	0.565231	-0.4333	0.163544	0.673401	-0.58135	-0.08728	0.468594	-0.14947	0.57026	0.674942	0.181522	0.45393	0.563305	-0.51681	0.123666	0.319626
7	0.54255	1.45951	-0.10167	0.168241	1.28401	-0.0842	0.308499	1.41015	-0.08431	0.140678	0.874189	-0.09547	0.149664	0.831363	0.048553	0.065942	0.868892	0.086569	0.23094	0.696271		-0.14661	0.399265	0.05954	1.103	1.55447	-0.07395	1.0556	1.11943	0.017577	0.799344	1.26618	0.063463	0.545134	1.16227	-0.00321	-0.30148	0.588529	0.064807	-0.14768	0.136971	0.004113	0.099073	-0.11137	-0.01101	-0.55626	0.224288	0.03418
9	-0.07885	0.825808	0.267078	0.43729	0.635903	0.181481	0.27861	0.850979	0.168601	0.294552	1.37769	0.155053	0.347821	1.38725	0.254199	0.096116	1.41865	0.395067	0.136004	1.38667		-0.33861	0.568688	0.298892	0.056109	0.801404	0.318901	0.254376	0.728905	0.242086	0.498318	1.05657	0.275889	-0.08044	0.979875	0.246044	0.512612	0.143592	0.414952	0.316074	-0.2989	0.243422	0.706033	-0.04978	0.336484	0.298938	0.066718	1.1228
mGluR PAM
Time (sec)	Theta
-9	0.84853	0.750903	0.044744	0.27578	0.767969	0.344749	0.44588	0.752587	0.290402	0.454905	0.691086	0.304279	0.305085	0.688293	0.371598	0.403261	0.697419	0.377839	0.468974	0.716545		0.219845	1.19304	0.378848	0.325255	0.502296	0.333372	0.263954	0.421744	0.334144	0.392928	0.62101	0.330475	0.859337	0.682089	0.3471	-0.62602	0.661881	0.36966	0.376618	0.976599	0.297394	0.564938	0.916465	0.168687	0.527124	0.592322	-0.51513
-7	0.21809	0.754159	1.07969	0.352999	0.903231	0.329867	0.141707	0.70787	0.317094	0.20227	0.815187	0.33128	0.496339	0.816278	0.364942	0.25543	0.830917	0.373924	0.142702	0.851045		0.538973	0.677821	0.361664	0.062318	0.999107	0.342315	0.154104	0.970299	0.42166	0.171593	0.676116	0.410871	0.252272	0.716834	0.413713	-0.21837	1.06676	0.36668	-0.04932	1.21137	0.291332	-0.0371	1.12221	0.221064	-0.36311	0.972891	-0.94657
-5	-0.60847	0.596831	0.732783	-0.18109	0.823158	0.403463	-0.25177	0.592257	0.345359	-0.31229	0.90616	0.331145	-0.12849	0.903009	0.387326	-0.20831	0.903728	0.396986	-0.26743	0.938274		-0.47766	0.729586	0.391183	-0.88487	0.919688	0.354198	-0.38012	0.874434	0.399168	-0.41729	0.91807	0.422906	-0.7314	0.55562	0.395801	-0.37003	1.00797	0.364825	-0.4407	0.85458	0.401399	-0.52174	0.891236	0.476303	-0.48196	0.869823	0.446797
-3	-0.92829	1.13093	-0.47833	-0.569	1.1375	-0.02809	-0.61025	1.15375	0.025519	-0.43826	1.3054	0.010803	-0.47002	1.31366	-0.13111	-0.36565	1.2863	-0.11852	-0.68283	1.23274		-0.8225	1.36945	-0.12535	-0.91361	1.28842	-0.11338	-0.81166	1.2635	-0.02695	-0.81016	1.36375	-0.01316	-0.96898	1.24033	-0.04624	-0.09126	1.14498	-0.152	-0.97821	0.838334	-0.2361	-0.87392	0.883592	-0.18352	-0.60422	1.25506	0.334683
-1	-1.06706	0.153893	-1.86584	-1.39566	0.295013	-1.87546	-1.44419	0.143235	-1.87429	-1.46138	0.229579	-1.87348	-1.60336	0.229564	-1.88351	-1.33152	0.241694	-1.89967	-1.14131	0.249124		0.772875	-0.13416	-1.89351	-0.59759	-0.23204	-1.90006	-1.29334	-0.03521	-1.94442	-1.48717	0.365214	-1.92824	-1.04089	0.155834	-1.93773	1.09137	0.018302	-1.86835	-0.83213	-0.11828	-1.92904	-0.67184	0.122022	-1.92509	1.59392	0.488577	-1.33057
1	-0.25167	0.178816	-0.86997	-0.32112	0.104181	-0.60115	-0.24818	0.164807	-0.52087	-0.32387	-0.0274	-0.52305	-0.64099	-0.02891	-0.58004	-0.36131	-0.01461	-0.57864	-0.27717	0.046374		0.008611	-0.46754	-0.57903	0.716479	-0.52969	-0.53692	0.015541	-0.44531	-0.57963	-0.21738	-0.09203	-0.57622	-0.24031	0.141653	-0.54114	1.21664	-0.43696	-0.57171	-0.30436	-0.25908	-0.59505	0.002723	-0.41906	-0.59703	0.312195	-0.66707	-0.80312
3	-0.33765	0.258732	0.064773	-0.2431	-0.20543	0.383963	-0.11597	0.258296	0.41859	-0.20352	-0.18464	0.419009	-0.27325	-0.19064	0.455128	-0.31623	-0.1896	0.457131	-0.1835	-0.23302		-0.64784	-0.04705	0.455521	0.152891	-0.01284	0.364899	0.20658	-0.17311	0.354058	0.250446	-0.26797	0.361048	-0.37783	0.260441	0.397903	0.995897	-0.39336	0.444914	0.091606	-0.33566	0.524767	-0.00348	-0.47898	0.556374	-0.63946	-0.60159	1.48615
5	0.776134	-0.45786	0.554276	0.445513	-0.64634	0.968662	0.662625	-0.39308	1.02297	0.462785	-0.71444	1.03278	0.510902	-0.70872	0.931082	0.312592	-0.72095	0.910107	0.66301	-0.78874		0.106405	-0.56343	0.920695	0.790092	-0.13681	0.958081	0.840807	0.01864	0.930031	0.804314	-0.51338	0.913052	0.907465	-0.39735	0.928837	-0.65985	-0.12819	0.945379	0.805834	-0.17312	0.770476	0.404623	-0.14169	0.823908	-0.38042	-0.486	0.905062
7	0.333834	-1.51246	0.316047	0.47784	-1.36792	0.02256	0.346959	-1.54106	-0.02577	0.528666	-1.23244	-0.0275	0.588945	-1.23282	-0.03988	0.375539	-1.24595	-0.04234	0.33632	-1.22196		-0.01915	-1.02317	-0.03366	-0.12825	-0.93018	0.048059	0.208935	-0.97372	0.069552	0.337084	-1.31327	0.035992	0.386942	-1.50334	-0.02952	-0.56886	-1.10196	-0.03308	0.432569	-1.12146	0.021173	0.426052	-1.01552	0.058196	-0.08476	-0.83442	0.317233
9	1.01656	-1.85394	0.421824	1.15784	-1.81136	0.051429	1.07318	-1.83867	0.000992	1.09069	-1.78849	-0.00527	1.21483	-1.78972	0.124462	1.2362	-1.78894	0.123183	0.941239	-1.79038		0.320435	-1.73454	0.123642	0.477283	-1.86797	0.149429	0.7952	-1.92126	0.042392	0.975628	-1.75751	0.043279	0.953397	-1.8521	0.071275	-0.76953	-1.83941	0.133673	0.89809	-1.87328	0.453648	0.709746	-1.88027	0.401114	0.120687	-1.58958	0.105479

## Sheet: Figure 4Ei
Frequency (Hz)	Vehicle																																	mGluR PAM
3.41797	2.98894e-05	2.98882e-05	3.04147e-05	2.9605e-05	3.00372e-05	2.97092e-05	3.11302e-05	3.11785e-05	0.000169	0.000165	2.86037e-05	2.85368e-05	2.87501e-05	2.87135e-05	2.8407e-05	0.000152		2.57426e-05	2.17842e-05	2.22346e-05	2.19798e-05	2.15141e-05	2.31959e-05	2.26256e-05	2.23138e-05	2.07977e-05	2.23791e-05	2.28186e-05	2.27159e-05	2.19878e-05	2.20803e-05	2.17841e-05	0.00035	3.21219e-05	3.20691e-05	3.2622e-05	3.17847e-05	3.1966e-05	3.18686e-05	3.34016e-05	3.3431e-05	0.000123	0.00012	3.08147e-05	3.07627e-05	3.10156e-05	3.0938e-05	3.06048e-05	0.000112
3.90625	4.21773e-05	4.21668e-05	4.29136e-05	4.18186e-05	4.24202e-05	4.20222e-05	4.38796e-05	4.38857e-05	0.000211	0.00021	4.0269e-05	4.0224e-05	4.05766e-05	4.04624e-05	4.00574e-05	0.00019		3.57792e-05	3.01414e-05	3.07249e-05	3.03904e-05	2.98155e-05	3.2178e-05	3.12346e-05	3.09211e-05	2.89521e-05	3.09859e-05	3.15475e-05	3.14624e-05	3.0498e-05	3.05739e-05	3.01895e-05	0.000436	4.54529e-05	4.53787e-05	4.6157e-05	4.50165e-05	4.53154e-05	4.52178e-05	4.7209e-05	4.72041e-05	0.000155	0.000151	4.3544e-05	4.3484e-05	4.39203e-05	4.37609e-05	4.33329e-05	0.00014
4.39453	5.37253e-05	5.35851e-05	5.45804e-05	5.31854e-05	5.39123e-05	5.3532e-05	5.56822e-05	5.57801e-05	0.000233	0.000235	5.12996e-05	5.11838e-05	5.17337e-05	5.1597e-05	5.10877e-05	0.000211		4.43279e-05	3.73125e-05	3.80065e-05	3.76014e-05	3.70272e-05	3.97345e-05	3.86466e-05	3.83265e-05	3.60005e-05	3.83605e-05	3.90914e-05	3.89417e-05	3.78146e-05	3.78409e-05	3.741e-05	0.000461	5.75897e-05	5.73754e-05	5.8374e-05	5.69563e-05	5.73871e-05	5.72979e-05	5.96037e-05	5.97061e-05	0.000173	0.000169	5.5127e-05	5.50208e-05	5.56617e-05	5.54427e-05	5.49241e-05	0.000155
4.88281	6.34221e-05	6.31126e-05	6.43231e-05	6.26909e-05	6.35666e-05	6.32368e-05	6.55319e-05	6.57502e-05	0.000236	0.000236	6.06061e-05	6.04026e-05	6.11575e-05	6.10604e-05	6.04515e-05	0.000213		5.01675e-05	4.25483e-05	4.33281e-05	4.28826e-05	4.23753e-05	4.53392e-05	4.40548e-05	4.38449e-05	4.1399e-05	4.38227e-05	4.45383e-05	4.43907e-05	4.32865e-05	4.32989e-05	4.281e-05	0.000449	6.80974e-05	6.77205e-05	6.89607e-05	6.72749e-05	6.79553e-05	6.78773e-05	7.03363e-05	7.05458e-05	0.000175	0.00017	6.52804e-05	6.49909e-05	6.59071e-05	6.57662e-05	6.51162e-05	0.000155
5.37109	7.35457e-05	7.29357e-05	7.42841e-05	7.2524e-05	7.34831e-05	7.32767e-05	7.57302e-05	7.60852e-05	0.000225	0.000219	7.05622e-05	6.99402e-05	7.10303e-05	7.10989e-05	7.03538e-05	0.0002		5.55829e-05	4.75289e-05	4.83106e-05	4.78327e-05	4.74022e-05	5.04483e-05	4.92191e-05	4.9127e-05	4.64079e-05	4.88606e-05	4.9425e-05	4.93451e-05	4.84166e-05	4.83596e-05	4.78038e-05	0.000408	7.86167e-05	7.79242e-05	7.93265e-05	7.74871e-05	7.83238e-05	7.83237e-05	8.09509e-05	8.12675e-05	0.000168	0.000163	7.56376e-05	7.49058e-05	7.62035e-05	7.62377e-05	7.54531e-05	0.000148
5.85938	8.44253e-05	8.33556e-05	8.48532e-05	8.29354e-05	8.3914e-05	8.38809e-05	8.65303e-05	8.71366e-05	0.000214	0.000205	8.11819e-05	8.02218e-05	8.15438e-05	8.18546e-05	8.09169e-05	0.000189		6.12807e-05	5.3314e-05	5.41553e-05	5.35856e-05	5.32158e-05	5.61233e-05	5.52031e-05	5.51907e-05	5.25609e-05	5.48964e-05	5.53897e-05	5.51612e-05	5.44839e-05	5.44535e-05	5.38317e-05	0.000364	8.90412e-05	8.79206e-05	8.94527e-05	8.74799e-05	8.83613e-05	8.85041e-05	9.12863e-05	9.18526e-05	0.000158	0.000153	8.57989e-05	8.4671e-05	8.62208e-05	8.65401e-05	8.5558e-05	0.00014
6.34766	9.63244e-05	9.48098e-05	9.64998e-05	9.43741e-05	9.53543e-05	9.54982e-05	9.84052e-05	9.92802e-05	0.000207	0.000192	9.28778e-05	9.1348e-05	9.30592e-05	9.36852e-05	9.25745e-05	0.000182		6.79496e-05	5.97361e-05	6.05543e-05	5.97893e-05	5.95209e-05	6.26591e-05	6.18548e-05	6.19992e-05	5.93845e-05	6.16421e-05	6.20405e-05	6.16879e-05	6.12629e-05	6.14019e-05	6.06555e-05	0.000329	9.89573e-05	9.74259e-05	9.90707e-05	9.69874e-05	9.78762e-05	9.81738e-05	0.000101	0.000102	0.000154	0.000146	9.55126e-05	9.38558e-05	9.57404e-05	9.63763e-05	9.52102e-05	0.000137
6.83594	0.000107	0.000105	0.000107	0.000105	0.000105	0.000106	0.000109	0.00011	0.0002	0.000183	0.000103	0.000101	0.000103	0.000104	0.000103	0.000176		7.83301e-05	6.98727e-05	7.06629e-05	6.96411e-05	6.94854e-05	7.27196e-05	7.23089e-05	7.26713e-05	7.02938e-05	7.23115e-05	7.2726e-05	7.20944e-05	7.19944e-05	7.23304e-05	7.13645e-05	0.000301	0.000107	0.000105	0.000107	0.000105	0.000105	0.000106	0.000109	0.00011	0.000151	0.000138	0.000103	0.000101	0.000103	0.000104	0.000103	0.000133
7.32422	0.000117	0.000114	0.000116	0.000114	0.000114	0.000115	0.000119	0.00012	0.000195	0.000177	0.000113	0.000111	0.000113	0.000114	0.000113	0.000172		9.4839e-05	8.59194e-05	8.66998e-05	8.51994e-05	8.5157e-05	8.85294e-05	8.87883e-05	8.93985e-05	8.76117e-05	8.94852e-05	9.00913e-05	8.87887e-05	8.8959e-05	8.96664e-05	8.84557e-05	0.000284	0.000113	0.00011	0.000112	0.00011	0.00011	0.000111	0.000114	0.000116	0.000145	0.000132	0.000109	0.000106	0.000108	0.00011	0.000108	0.000128
7.8125	0.000123	0.00012	0.000121	0.000119	0.00012	0.00012	0.000124	0.000126	0.000185	0.000169	0.000119	0.000116	0.000118	0.00012	0.000118	0.000165		0.000118	0.000108	0.000109	0.000107	0.000107	0.000111	0.000112	0.000113	0.000111	0.000114	0.000114	0.000112	0.000113	0.000114	0.000112	0.000273	0.000115	0.000112	0.000114	0.000112	0.000112	0.000113	0.000117	0.000118	0.000137	0.000124	0.000111	0.000108	0.000111	0.000112	0.000111	0.000121
8.30078	0.000121	0.000117	0.000119	0.000117	0.000117	0.000118	0.000122	0.000123	0.000171	0.000153	0.000117	0.000113	0.000116	0.000118	0.000116	0.000151		0.00014	0.00013	0.000131	0.000129	0.000129	0.000133	0.000135	0.000136	0.000134	0.000137	0.000138	0.000135	0.000136	0.000137	0.000135	0.000258	0.000112	0.000108	0.00011	0.000108	0.000108	0.000109	0.000113	0.000114	0.000124	0.000112	0.000108	0.000104	0.000107	0.000109	0.000107	0.000111
8.78906	0.000111	0.000107	0.000109	0.000107	0.000107	0.000108	0.000111	0.000113	0.000151	0.000136	0.000107	0.000104	0.000106	0.000108	0.000106	0.000134		0.000152	0.000142	0.000143	0.00014	0.00014	0.000144	0.000147	0.000148	0.000145	0.000149	0.00015	0.000147	0.000148	0.00015	0.000148	0.000241	0.000102	9.85722e-05	9.99745e-05	9.82402e-05	9.86128e-05	9.93346e-05	0.000103	0.000104	0.000109	0.0001	9.78525e-05	9.50486e-05	9.70088e-05	9.9031e-05	9.75081e-05	9.79497e-05
9.27734	9.50612e-05	9.21184e-05	9.34262e-05	9.17783e-05	9.23094e-05	9.28034e-05	9.57101e-05	9.71132e-05	0.000129	0.000119	9.13503e-05	8.91606e-05	9.06517e-05	9.22062e-05	9.09567e-05	0.000117		0.000149	0.000139	0.00014	0.000137	0.000137	0.000141	0.000143	0.000145	0.00014	0.000146	0.000147	0.000144	0.000145	0.000147	0.000144	0.000214	8.79227e-05	8.52637e-05	8.65014e-05	8.49689e-05	8.53505e-05	8.5942e-05	8.86165e-05	8.98563e-05	9.4339e-05	8.85514e-05	8.4181e-05	8.20825e-05	8.36554e-05	8.52115e-05	8.39599e-05	8.63222e-05
9.76562	7.53971e-05	7.32468e-05	7.42868e-05	7.29376e-05	7.34289e-05	7.38194e-05	7.6047e-05	7.70853e-05	0.000115	0.000106	7.19414e-05	7.05729e-05	7.17122e-05	7.26897e-05	7.17701e-05	0.000103		0.00013	0.000121	0.000121	0.000119	0.000119	0.000123	0.000125	0.000126	0.00012	0.000126	0.000128	0.000125	0.000126	0.000128	0.000125	0.000186	7.04487e-05	6.84787e-05	6.94666e-05	6.82132e-05	6.86199e-05	6.90386e-05	7.11031e-05	7.20346e-05	8.35418e-05	7.88824e-05	6.70656e-05	6.57133e-05	6.69086e-05	6.7891e-05	6.69687e-05	7.70504e-05
10.2539	5.84817e-05	5.70284e-05	5.78875e-05	5.67652e-05	5.73097e-05	5.75506e-05	5.91652e-05	5.99205e-05	0.000101	9.52698e-05	5.51807e-05	5.47186e-05	5.55074e-05	5.57928e-05	5.51883e-05	9.13396e-05		0.000103	9.42414e-05	9.48161e-05	9.28208e-05	9.33404e-05	9.62851e-05	9.7094e-05	9.83461e-05	9.23847e-05	9.80574e-05	9.92275e-05	9.73976e-05	9.7752e-05	9.95192e-05	9.7621e-05	0.00016	5.50168e-05	5.37063e-05	5.44918e-05	5.34772e-05	5.38929e-05	5.41693e-05	5.56975e-05	5.63679e-05	7.42116e-05	7.11002e-05	5.18274e-05	5.13415e-05	5.2156e-05	5.24888e-05	5.1889e-05	6.79211e-05
10.7422	4.57863e-05	4.48169e-05	4.55245e-05	4.46444e-05	4.51536e-05	4.5258e-05	4.64633e-05	4.70062e-05	9.08981e-05	8.65852e-05	4.28783e-05	4.28927e-05	4.3475e-05	4.33649e-05	4.29736e-05	8.19197e-05		7.64216e-05	6.89781e-05	6.94787e-05	6.80724e-05	6.85056e-05	7.10902e-05	7.11163e-05	7.19773e-05	6.68484e-05	7.14725e-05	7.24138e-05	7.1226e-05	7.13732e-05	7.26504e-05	7.12578e-05	0.000141	4.35909e-05	4.27018e-05	4.33508e-05	4.25355e-05	4.29169e-05	4.30932e-05	4.42477e-05	4.4712e-05	6.72208e-05	6.42436e-05	4.07682e-05	4.07425e-05	4.13464e-05	4.12731e-05	4.08983e-05	6.07578e-05
11.2305	3.76529e-05	3.69914e-05	3.76015e-05	3.68677e-05	3.7322e-05	3.73884e-05	3.83107e-05	3.87006e-05	8.28491e-05	7.81073e-05	3.50883e-05	3.53207e-05	3.57603e-05	3.54765e-05	3.52439e-05	7.3282e-05		5.86888e-05	5.22211e-05	5.26619e-05	5.16946e-05	5.19574e-05	5.42187e-05	5.38079e-05	5.43579e-05	5.00208e-05	5.37894e-05	5.45053e-05	5.38662e-05	5.37677e-05	5.46701e-05	5.36357e-05	0.000127	3.63256e-05	3.56885e-05	3.6254e-05	3.55763e-05	3.59424e-05	3.60579e-05	3.69763e-05	3.73066e-05	6.01659e-05	5.77429e-05	3.37922e-05	3.39995e-05	3.44852e-05	3.42046e-05	3.39637e-05	5.40252e-05
11.7188	3.21592e-05	3.16924e-05	3.22449e-05	3.16082e-05	3.20472e-05	3.20624e-05	3.28181e-05	3.3112e-05	7.32758e-05	6.86967e-05	2.97644e-05	3.0176e-05	3.05385e-05	3.00967e-05	2.99771e-05	6.4404e-05		4.73803e-05	4.15082e-05	4.19397e-05	4.12288e-05	4.13483e-05	4.33758e-05	4.27253e-05	4.30379e-05	3.94286e-05	4.24883e-05	4.30874e-05	4.27647e-05	4.24838e-05	4.30854e-05	4.22982e-05	0.000114	3.14269e-05	3.09334e-05	3.145e-05	3.08566e-05	3.12083e-05	3.12867e-05	3.20427e-05	3.23479e-05	5.32555e-05	5.04906e-05	2.90741e-05	2.94343e-05	2.98227e-05	2.94096e-05	2.92827e-05	4.70024e-05
12.207	2.8142e-05	2.77159e-05	2.82365e-05	2.76502e-05	2.80467e-05	2.80633e-05	2.87142e-05	2.90124e-05	6.62069e-05	6.20268e-05	2.59822e-05	2.64303e-05	2.67432e-05	2.62888e-05	2.62039e-05	5.83431e-05		4.01539e-05	3.44691e-05	3.48494e-05	3.4335e-05	3.437e-05	3.61687e-05	3.5463e-05	3.55868e-05	3.25327e-05	3.50838e-05	3.5596e-05	3.54316e-05	3.5064e-05	3.55091e-05	3.48579e-05	0.000106	2.7697e-05	2.72648e-05	2.77365e-05	2.71955e-05	2.7536e-05	2.7614e-05	2.82517e-05	2.85422e-05	4.78297e-05	4.51901e-05	2.55447e-05	2.59747e-05	2.63025e-05	2.58621e-05	2.57651e-05	4.2626e-05
12.6953	2.52785e-05	2.49233e-05	2.54296e-05	2.48579e-05	2.52247e-05	2.52245e-05	2.57795e-05	2.60661e-05	5.95999e-05	5.48347e-05	2.32934e-05	2.37309e-05	2.39969e-05	2.36227e-05	2.35271e-05	5.27424e-05		3.48035e-05	2.9494e-05	2.98461e-05	2.94277e-05	2.94037e-05	3.10705e-05	3.03062e-05	3.03772e-05	2.77255e-05	2.99187e-05	3.03943e-05	3.03174e-05	2.98951e-05	3.02469e-05	2.96923e-05	9.69479e-05	2.47543e-05	2.43819e-05	2.48443e-05	2.43153e-05	2.46311e-05	2.46836e-05	2.52263e-05	2.55206e-05	4.36101e-05	4.06628e-05	2.27897e-05	2.32019e-05	2.34764e-05	2.31172e-05	2.30167e-05	3.89325e-05
13.1836	2.2876e-05	2.25466e-05	2.30226e-05	2.24794e-05	2.28087e-05	2.28046e-05	2.32797e-05	2.3555e-05	5.61414e-05	5.13578e-05	2.1102e-05	2.14559e-05	2.17336e-05	2.14106e-05	2.12937e-05	4.93795e-05		3.07238e-05	2.58659e-05	2.61859e-05	2.58659e-05	2.57609e-05	2.7271e-05	2.65328e-05	2.66032e-05	2.43237e-05	2.62277e-05	2.66415e-05	2.66453e-05	2.61495e-05	2.64621e-05	2.59682e-05	8.82857e-05	2.23767e-05	2.2022e-05	2.24587e-05	2.19599e-05	2.22424e-05	2.22764e-05	2.27516e-05	2.30343e-05	4.10272e-05	3.83344e-05	2.06245e-05	2.097e-05	2.12437e-05	2.0937e-05	2.08228e-05	3.66889e-05
13.6719	2.07604e-05	2.04379e-05	2.08785e-05	2.03701e-05	2.06386e-05	2.06426e-05	2.10646e-05	2.13439e-05	5.19793e-05	4.80271e-05	1.917e-05	1.94562e-05	1.96976e-05	1.94351e-05	1.93127e-05	4.64113e-05		2.76934e-05	2.31306e-05	2.34123e-05	2.3131e-05	2.29924e-05	2.44807e-05	2.36783e-05	2.37248e-05	2.17601e-05	2.3408e-05	2.37718e-05	2.38276e-05	2.33089e-05	2.35967e-05	2.31282e-05	8.28062e-05	2.03124e-05	2.00014e-05	2.04159e-05	1.99351e-05	2.01708e-05	2.02054e-05	2.06159e-05	2.08686e-05	3.75426e-05	3.6266e-05	1.87682e-05	1.90145e-05	1.92724e-05	1.90216e-05	1.89071e-05	3.48735e-05
14.1602	1.90305e-05	1.87214e-05	1.91239e-05	1.86622e-05	1.88791e-05	1.88918e-05	1.9298e-05	1.95688e-05	4.90186e-05	4.53078e-05	1.761e-05	1.78135e-05	1.80553e-05	1.78408e-05	1.77176e-05	4.35151e-05		2.52981e-05	2.10524e-05	2.13263e-05	2.10663e-05	2.08952e-05	2.23265e-05	2.15031e-05	2.15924e-05	1.98905e-05	2.13287e-05	2.16609e-05	2.17211e-05	2.12017e-05	2.1447e-05	2.10283e-05	7.57896e-05	1.87176e-05	1.84219e-05	1.87971e-05	1.83541e-05	1.854e-05	1.85912e-05	1.898e-05	1.92304e-05	3.61244e-05	3.44707e-05	1.72978e-05	1.74775e-05	1.77489e-05	1.75308e-05	1.74138e-05	3.30392e-05
14.6484	1.78625e-05	1.75888e-05	1.79799e-05	1.75355e-05	1.77273e-05	1.77573e-05	1.81114e-05	1.83182e-05	4.76501e-05	4.35115e-05	1.65005e-05	1.67092e-05	1.69373e-05	1.6696e-05	1.65926e-05	4.17621e-05		2.35575e-05	1.94855e-05	1.97414e-05	1.95005e-05	1.93317e-05	2.07577e-05	1.98986e-05	1.99691e-05	1.85234e-05	1.975e-05	2.00562e-05	2.01084e-05	1.96173e-05	1.98171e-05	1.94328e-05	7.05282e-05	1.75687e-05	1.72989e-05	1.76463e-05	1.72361e-05	1.74049e-05	1.74706e-05	1.78139e-05	1.80108e-05	3.43526e-05	3.26618e-05	1.61901e-05	1.6374e-05	1.66218e-05	1.63786e-05	1.62806e-05	3.1261e-05
15.1367	1.7001e-05	1.67568e-05	1.71024e-05	1.67119e-05	1.6903e-05	1.69104e-05	1.7268e-05	1.75165e-05	4.51946e-05	4.16637e-05	1.56693e-05	1.58933e-05	1.60878e-05	1.58759e-05	1.57622e-05	4.02439e-05		2.24525e-05	1.84925e-05	1.87374e-05	1.85135e-05	1.83658e-05	1.97419e-05	1.88905e-05	1.89761e-05	1.76826e-05	1.8777e-05	1.90251e-05	1.90981e-05	1.86287e-05	1.87858e-05	1.84476e-05	6.76467e-05	1.65637e-05	1.63191e-05	1.66093e-05	1.6264e-05	1.64006e-05	1.64751e-05	1.68081e-05	1.70341e-05	3.27224e-05	3.1039e-05	1.52418e-05	1.54088e-05	1.56376e-05	1.5435e-05	1.5322e-05	2.99585e-05
15.625	1.62289e-05	1.59986e-05	1.63448e-05	1.59474e-05	1.61228e-05	1.61761e-05	1.64885e-05	1.67509e-05	4.41624e-05	3.99719e-05	1.49412e-05	1.51673e-05	1.53423e-05	1.51272e-05	1.5026e-05	3.94603e-05		2.16125e-05	1.77597e-05	1.7992e-05	1.77883e-05	1.76673e-05	1.90068e-05	1.81535e-05	1.82309e-05	1.70639e-05	1.80408e-05	1.82529e-05	1.83284e-05	1.78792e-05	1.80463e-05	1.77026e-05	6.61569e-05	1.56363e-05	1.54054e-05	1.56746e-05	1.53565e-05	1.54936e-05	1.55769e-05	1.58711e-05	1.61177e-05	3.15589e-05	3.00175e-05	1.43716e-05	1.45588e-05	1.47638e-05	1.45887e-05	1.44722e-05	2.89295e-05
16.1133	1.58499e-05	1.56209e-05	1.59853e-05	1.5569e-05	1.57461e-05	1.57969e-05	1.60854e-05	1.64221e-05	4.33732e-05	3.92625e-05	1.45908e-05	1.48346e-05	1.49963e-05	1.47808e-05	1.46668e-05	3.88149e-05		2.0963e-05	1.70975e-05	1.73172e-05	1.71385e-05	1.70279e-05	1.82712e-05	1.75168e-05	1.75749e-05	1.65522e-05	1.7417e-05	1.76418e-05	1.76492e-05	1.72317e-05	1.74275e-05	1.70787e-05	6.36646e-05	1.49469e-05	1.47165e-05	1.49993e-05	1.46748e-05	1.48108e-05	1.48852e-05	1.51594e-05	1.54646e-05	3.04796e-05	2.91186e-05	1.37669e-05	1.39352e-05	1.41303e-05	1.39942e-05	1.38492e-05	2.81688e-05
16.6016	1.55575e-05	1.53221e-05	1.56886e-05	1.52801e-05	1.54773e-05	1.54986e-05	1.58e-05	1.61786e-05	4.15651e-05	3.78035e-05	1.43265e-05	1.45851e-05	1.47116e-05	1.44787e-05	1.43811e-05	3.75323e-05		2.05707e-05	1.68735e-05	1.70737e-05	1.68954e-05	1.67805e-05	1.79956e-05	1.72485e-05	1.73782e-05	1.63472e-05	1.71598e-05	1.73303e-05	1.74258e-05	1.69884e-05	1.71637e-05	1.6832e-05	6.14499e-05	1.4429e-05	1.4208e-05	1.45001e-05	1.41791e-05	1.43195e-05	1.43733e-05	1.46543e-05	1.49773e-05	2.87992e-05	2.7566e-05	1.3302e-05	1.34808e-05	1.36543e-05	1.35214e-05	1.33809e-05	2.69097e-05
17.0898	1.51049e-05	1.48608e-05	1.5228e-05	1.48271e-05	1.50319e-05	1.50293e-05	1.53237e-05	1.5714e-05	3.98644e-05	3.57772e-05	1.39118e-05	1.41874e-05	1.43003e-05	1.40305e-05	1.39471e-05	3.56942e-05		2.06216e-05	1.69646e-05	1.71361e-05	1.68942e-05	1.68381e-05	1.80584e-05	1.73021e-05	1.75189e-05	1.64322e-05	1.71322e-05	1.73697e-05	1.74702e-05	1.70639e-05	1.72038e-05	1.68745e-05	5.76659e-05	1.39061e-05	1.36815e-05	1.39872e-05	1.36578e-05	1.38065e-05	1.38483e-05	1.41163e-05	1.44615e-05	2.74574e-05	2.58443e-05	1.28232e-05	1.30022e-05	1.31638e-05	1.30008e-05	1.28768e-05	2.53991e-05
17.5781	1.45621e-05	1.4318e-05	1.46628e-05	1.42889e-05	1.44947e-05	1.44705e-05	1.47817e-05	1.51596e-05	3.76346e-05	3.41243e-05	1.34327e-05	1.36999e-05	1.37881e-05	1.35528e-05	1.34549e-05	3.36807e-05		2.0541e-05	1.69387e-05	1.7123e-05	1.68503e-05	1.68017e-05	1.79948e-05	1.72608e-05	1.74799e-05	1.64841e-05	1.7076e-05	1.73343e-05	1.74075e-05	1.70508e-05	1.71432e-05	1.68431e-05	5.36993e-05	1.33906e-05	1.31723e-05	1.34738e-05	1.31506e-05	1.32963e-05	1.33325e-05	1.36098e-05	1.39233e-05	2.60077e-05	2.44408e-05	1.23571e-05	1.25331e-05	1.26694e-05	1.25254e-05	1.23861e-05	2.40911e-05
18.0664	1.38392e-05	1.36068e-05	1.39226e-05	1.35803e-05	1.37863e-05	1.37534e-05	1.40474e-05	1.44208e-05	3.56491e-05	3.21867e-05	1.27491e-05	1.30029e-05	1.31011e-05	1.29188e-05	1.2779e-05	3.15751e-05		2.02516e-05	1.67603e-05	1.69307e-05	1.66461e-05	1.66413e-05	1.777e-05	1.70765e-05	1.72998e-05	1.63006e-05	1.68751e-05	1.7129e-05	1.72168e-05	1.68834e-05	1.69394e-05	1.66554e-05	5.00876e-05	1.28712e-05	1.2667e-05	1.29515e-05	1.26472e-05	1.27737e-05	1.28155e-05	1.3091e-05	1.34017e-05	2.50946e-05	2.36931e-05	1.18724e-05	1.20441e-05	1.21839e-05	1.20785e-05	1.19088e-05	2.29507e-05
18.5547	1.3056e-05	1.28345e-05	1.31127e-05	1.28073e-05	1.29802e-05	1.29775e-05	1.32552e-05	1.36292e-05	3.39662e-05	3.08756e-05	1.20283e-05	1.22407e-05	1.23503e-05	1.22617e-05	1.20596e-05	2.99171e-05		1.96349e-05	1.62602e-05	1.64119e-05	1.61539e-05	1.61656e-05	1.71918e-05	1.65683e-05	1.67559e-05	1.58043e-05	1.63772e-05	1.66514e-05	1.66986e-05	1.63826e-05	1.64639e-05	1.61649e-05	4.76713e-05	1.2297e-05	1.20889e-05	1.23408e-05	1.20712e-05	1.2195e-05	1.22315e-05	1.25007e-05	1.28221e-05	2.45411e-05	2.29858e-05	1.13349e-05	1.14987e-05	1.16311e-05	1.15805e-05	1.13827e-05	2.22993e-05
19.043	1.22459e-05	1.20265e-05	1.2296e-05	1.19964e-05	1.21656e-05	1.21865e-05	1.2445e-05	1.28323e-05	3.20442e-05	2.91837e-05	1.12898e-05	1.14713e-05	1.15896e-05	1.15599e-05	1.13128e-05	2.83605e-05		1.86576e-05	1.55302e-05	1.56901e-05	1.54913e-05	1.54834e-05	1.64527e-05	1.58671e-05	1.59723e-05	1.51141e-05	1.57485e-05	1.59879e-05	1.60071e-05	1.56978e-05	1.57978e-05	1.54955e-05	4.55802e-05	1.16626e-05	1.14441e-05	1.16696e-05	1.14293e-05	1.15482e-05	1.15927e-05	1.18648e-05	1.22283e-05	2.35325e-05	2.17185e-05	1.0754e-05	1.08963e-05	1.10301e-05	1.10213e-05	1.07797e-05	2.12232e-05
19.5312	1.15524e-05	1.13242e-05	1.15802e-05	1.12962e-05	1.14598e-05	1.14769e-05	1.17752e-05	1.24803e-05	2.9903e-05	2.7771e-05	1.0646e-05	1.08275e-05	1.09276e-05	1.11899e-05	1.07168e-05	2.68313e-05		1.76435e-05	1.47123e-05	1.4861e-05	1.4689e-05	1.4692e-05	1.55794e-05	1.5043e-05	1.51168e-05	1.42121e-05	1.49512e-05	1.51519e-05	1.51508e-05	1.48565e-05	1.49892e-05	1.46886e-05	4.34401e-05	1.10489e-05	1.08142e-05	1.10198e-05	1.08078e-05	1.09296e-05	1.09613e-05	1.12715e-05	1.19666e-05	2.26196e-05	2.10241e-05	1.01831e-05	1.03334e-05	1.04542e-05	1.0691e-05	1.02641e-05	2.03122e-05
20.0195	1.11692e-05	1.09328e-05	1.11776e-05	1.09125e-05	1.10864e-05	1.10948e-05	1.14347e-05	1.24536e-05	2.79994e-05	2.62535e-05	1.02882e-05	1.04907e-05	1.05739e-05	1.11089e-05	1.0412e-05	2.52167e-05		1.68652e-05	1.41088e-05	1.42587e-05	1.41403e-05	1.41269e-05	1.49764e-05	1.44489e-05	1.44883e-05	1.35678e-05	1.43497e-05	1.45339e-05	1.45514e-05	1.42447e-05	1.43943e-05	1.40981e-05	4.1567e-05	1.06799e-05	1.04401e-05	1.06413e-05	1.04359e-05	1.05735e-05	1.06034e-05	1.09464e-05	1.21221e-05	2.12879e-05	2.00512e-05	9.83064e-06	1.00065e-05	1.0118e-05	1.07822e-05	9.98382e-06	1.91939e-05
20.5078	1.07907e-05	1.05528e-05	1.08066e-05	1.05354e-05	1.07249e-05	1.07216e-05	1.10719e-05	1.22279e-05	2.64267e-05	2.45376e-05	9.9669e-06	1.01364e-05	1.0244e-05	1.089e-05	1.01035e-05	2.39054e-05		1.6288e-05	1.35638e-05	1.37088e-05	1.36299e-05	1.35824e-05	1.44159e-05	1.39014e-05	1.39595e-05	1.29613e-05	1.38363e-05	1.39888e-05	1.40152e-05	1.37003e-05	1.38614e-05	1.35907e-05	4.00978e-05	1.03546e-05	1.00992e-05	1.03039e-05	1.00919e-05	1.02406e-05	1.02685e-05	1.06241e-05	1.18643e-05	2.00459e-05	1.88499e-05	9.55655e-06	9.70645e-06	9.81473e-06	1.05757e-05	9.70523e-06	1.80268e-05
20.9961	1.04618e-05	1.02319e-05	1.0469e-05	1.02212e-05	1.04072e-05	1.03759e-05	1.07386e-05	1.19444e-05	2.48481e-05	2.3803e-05	9.70173e-06	9.844e-06	9.9566e-06	1.06201e-05	9.82617e-06	2.29207e-05		1.57514e-05	1.30714e-05	1.32175e-05	1.31421e-05	1.30992e-05	1.38817e-05	1.33979e-05	1.34724e-05	1.2397e-05	1.33362e-05	1.35253e-05	1.34819e-05	1.31957e-05	1.33883e-05	1.31237e-05	3.80065e-05	1.00817e-05	9.83895e-06	1.00393e-05	9.82933e-06	9.97991e-06	9.99011e-06	1.03392e-05	1.15612e-05	1.87237e-05	1.82394e-05	9.32079e-06	9.46028e-06	9.55459e-06	1.03229e-05	9.47841e-06	1.73147e-05
21.4844	1.01395e-05	9.9156e-06	1.01372e-05	9.91473e-06	1.00886e-05	1.00614e-05	1.03827e-05	1.13678e-05	2.36968e-05	2.28488e-05	9.43808e-06	9.54328e-06	9.66332e-06	1.01919e-05	9.52941e-06	2.1949e-05		1.52996e-05	1.26942e-05	1.28432e-05	1.27773e-05	1.27316e-05	1.34885e-05	1.30229e-05	1.31038e-05	1.19032e-05	1.29315e-05	1.31834e-05	1.31002e-05	1.28305e-05	1.30273e-05	1.27748e-05	3.62732e-05	9.78869e-06	9.5547e-06	9.75032e-06	9.54935e-06	9.691e-06	9.70406e-06	1.00109e-05	1.09963e-05	1.77548e-05	1.76103e-05	9.06969e-06	9.17497e-06	9.28173e-06	9.89492e-06	9.18555e-06	1.66047e-05
21.9727	9.82857e-06	9.60455e-06	9.82664e-06	9.61083e-06	9.77606e-06	9.74775e-06	1.00188e-05	1.05699e-05	2.26487e-05	2.20266e-05	9.18909e-06	9.25481e-06	9.38302e-06	9.56593e-06	9.22683e-06	2.11134e-05		1.48778e-05	1.23517e-05	1.25072e-05	1.244e-05	1.2405e-05	1.31486e-05	1.26885e-05	1.27622e-05	1.14833e-05	1.25887e-05	1.2825e-05	1.27725e-05	1.24905e-05	1.26937e-05	1.24484e-05	3.46586e-05	9.4898e-06	9.26333e-06	9.45472e-06	9.26525e-06	9.40514e-06	9.40978e-06	9.65629e-06	1.01261e-05	1.71805e-05	1.72681e-05	8.82382e-06	8.88937e-06	9.00499e-06	9.16661e-06	8.86675e-06	1.62533e-05
22.4609	9.61852e-06	9.39514e-06	9.61421e-06	9.40138e-06	9.54703e-06	9.52938e-06	9.76864e-06	1.00153e-05	2.18474e-05	2.13607e-05	8.99333e-06	9.05095e-06	9.15659e-06	9.1014e-06	8.989e-06	2.0262e-05		1.44233e-05	1.20332e-05	1.21735e-05	1.21017e-05	1.20876e-05	1.28324e-05	1.23834e-05	1.24348e-05	1.10858e-05	1.22644e-05	1.25353e-05	1.2469e-05	1.21768e-05	1.23743e-05	1.21374e-05	3.35377e-05	9.29679e-06	9.06523e-06	9.24671e-06	9.07542e-06	9.20265e-06	9.2015e-06	9.42698e-06	9.63399e-06	1.62886e-05	1.65919e-05	8.65367e-06	8.70658e-06	8.81221e-06	8.75185e-06	8.66175e-06	1.5424e-05
22.9492	9.56786e-06	9.35271e-06	9.56638e-06	9.36311e-06	9.48903e-06	9.49007e-06	9.69813e-06	9.87466e-06	2.07473e-05	2.03286e-05	8.93659e-06	9.01827e-06	9.11093e-06	9.00333e-06	8.95499e-06	1.9188e-05		1.40559e-05	1.17774e-05	1.19289e-05	1.18511e-05	1.18562e-05	1.25586e-05	1.21292e-05	1.21819e-05	1.07788e-05	1.20009e-05	1.2265e-05	1.22455e-05	1.19462e-05	1.21086e-05	1.18882e-05	3.27262e-05	9.26945e-06	9.04515e-06	9.21988e-06	9.06358e-06	9.16994e-06	9.1817e-06	9.38509e-06	9.56591e-06	1.5452e-05	1.58219e-05	8.62982e-06	8.71849e-06	8.80821e-06	8.7023e-06	8.65104e-06	1.46985e-05
23.4375	9.63366e-06	9.41456e-06	9.63757e-06	9.4174e-06	9.54817e-06	9.54539e-06	9.7574e-06	9.91442e-06	1.98534e-05	1.95292e-05	8.98594e-06	9.09051e-06	9.16613e-06	9.04e-06	9.0046e-06	1.85793e-05		1.39072e-05	1.16774e-05	1.18321e-05	1.1745e-05	1.17526e-05	1.24124e-05	1.20356e-05	1.20695e-05	1.06412e-05	1.18867e-05	1.21636e-05	1.21208e-05	1.18341e-05	1.19794e-05	1.17704e-05	3.20014e-05	9.27141e-06	9.04517e-06	9.22528e-06	9.06338e-06	9.17281e-06	9.17784e-06	9.3831e-06	9.51334e-06	1.46948e-05	1.48836e-05	8.63548e-06	8.73773e-06	8.80593e-06	8.69063e-06	8.6544e-06	1.40551e-05
23.9258	9.76707e-06	9.55722e-06	9.7876e-06	9.55848e-06	9.69133e-06	9.67342e-06	9.89409e-06	1.00386e-05	1.91156e-05	1.85409e-05	9.08961e-06	9.21165e-06	9.29094e-06	9.14413e-06	9.09759e-06	1.7749e-05		1.37479e-05	1.16004e-05	1.17386e-05	1.16548e-05	1.16663e-05	1.23144e-05	1.19469e-05	1.19815e-05	1.05325e-05	1.18065e-05	1.2089e-05	1.20135e-05	1.17582e-05	1.19149e-05	1.17025e-05	3.07355e-05	9.38295e-06	9.16338e-06	9.35489e-06	9.17287e-06	9.28896e-06	9.28251e-06	9.48876e-06	9.62156e-06	1.42103e-05	1.39402e-05	8.71629e-06	8.83464e-06	8.9048e-06	8.76922e-06	8.73339e-06	1.3293e-05
24.4141	9.8892e-06	9.68506e-06	9.9244e-06	9.68717e-06	9.82505e-06	9.80646e-06	1.00128e-05	1.01543e-05	1.82644e-05	1.76253e-05	9.19014e-06	9.31833e-06	9.40112e-06	9.24351e-06	9.19065e-06	1.71066e-05		1.36501e-05	1.15202e-05	1.16798e-05	1.15833e-05	1.15835e-05	1.22391e-05	1.18408e-05	1.18795e-05	1.04206e-05	1.16826e-05	1.19801e-05	1.18867e-05	1.16611e-05	1.18275e-05	1.1612e-05	2.9588e-05	9.48075e-06	9.26369e-06	9.46543e-06	9.26982e-06	9.3923e-06	9.38828e-06	9.5818e-06	9.72167e-06	1.34486e-05	1.31437e-05	8.78165e-06	8.90805e-06	8.97893e-06	8.83198e-06	8.78598e-06	1.26365e-05
24.9023	9.83486e-06	9.62775e-06	9.86109e-06	9.62625e-06	9.76774e-06	9.75856e-06	9.96224e-06	1.01086e-05	1.80082e-05	1.72805e-05	9.16668e-06	9.25236e-06	9.35589e-06	9.23614e-06	9.14716e-06	1.6895e-05		1.3513e-05	1.14389e-05	1.16135e-05	1.15046e-05	1.15017e-05	1.21629e-05	1.17461e-05	1.1798e-05	1.03373e-05	1.15862e-05	1.18966e-05	1.17812e-05	1.1577e-05	1.17579e-05	1.15362e-05	2.85194e-05	9.42866e-06	9.22408e-06	9.42886e-06	9.2254e-06	9.36155e-06	9.35519e-06	9.54792e-06	9.68954e-06	1.30992e-05	1.27199e-05	8.73037e-06	8.82738e-06	8.92018e-06	8.79384e-06	8.71965e-06	1.23556e-05
25.3906	9.60755e-06	9.40725e-06	9.63463e-06	9.40522e-06	9.54642e-06	9.53865e-06	9.73738e-06	9.89348e-06	1.77545e-05	1.68911e-05	8.95904e-06	9.02068e-06	9.13805e-06	9.04325e-06	8.9419e-06	1.66476e-05		1.34934e-05	1.14311e-05	1.15825e-05	1.14909e-05	1.1483e-05	1.21267e-05	1.17303e-05	1.17806e-05	1.03751e-05	1.15911e-05	1.18696e-05	1.17682e-05	1.15756e-05	1.17547e-05	1.1537e-05	2.75413e-05	9.29248e-06	9.09405e-06	9.30122e-06	9.09107e-06	9.21757e-06	9.22453e-06	9.41943e-06	9.56202e-06	1.2789e-05	1.23566e-05	8.60458e-06	8.6719e-06	8.78684e-06	8.68131e-06	8.59515e-06	1.21217e-05
25.8789	9.3131e-06	9.09656e-06	9.30986e-06	9.09927e-06	9.21897e-06	9.2289e-06	9.43223e-06	9.59241e-06	1.77934e-05	1.66171e-05	8.69024e-06	8.74614e-06	8.8516e-06	8.77906e-06	8.67955e-06	1.6624e-05		1.33242e-05	1.13266e-05	1.14879e-05	1.14014e-05	1.13894e-05	1.19925e-05	1.16206e-05	1.16605e-05	1.03078e-05	1.14979e-05	1.17558e-05	1.16783e-05	1.14633e-05	1.1648e-05	1.14333e-05	2.69079e-05	9.01467e-06	8.80079e-06	8.99191e-06	8.80089e-06	8.9036e-06	8.93016e-06	9.13529e-06	9.27314e-06	1.261e-05	1.22065e-05	8.35164e-06	8.41472e-06	8.52111e-06	8.43693e-06	8.35294e-06	1.20155e-05
26.3672	9.08837e-06	8.86243e-06	9.05972e-06	8.8649e-06	8.97549e-06	8.98811e-06	9.20733e-06	9.34057e-06	1.70812e-05	1.62464e-05	8.48516e-06	8.52657e-06	8.6347e-06	8.57484e-06	8.48511e-06	1.60892e-05		1.30081e-05	1.10894e-05	1.12423e-05	1.11481e-05	1.11492e-05	1.17152e-05	1.13822e-05	1.14157e-05	1.01727e-05	1.12934e-05	1.15434e-05	1.14694e-05	1.12311e-05	1.14365e-05	1.12141e-05	2.62121e-05	8.79423e-06	8.56737e-06	8.74245e-06	8.57229e-06	8.65838e-06	8.6955e-06	8.91371e-06	9.03709e-06	1.24243e-05	1.18206e-05	8.1651e-06	8.21942e-06	8.31594e-06	8.25255e-06	8.16974e-06	1.17691e-05
26.8555	8.85291e-06	8.60412e-06	8.80131e-06	8.61081e-06	8.7082e-06	8.71858e-06	8.96034e-06	9.09509e-06	1.66901e-05	1.57204e-05	8.25793e-06	8.31046e-06	8.40657e-06	8.33723e-06	8.26161e-06	1.56291e-05		1.28505e-05	1.09696e-05	1.11173e-05	1.10243e-05	1.10247e-05	1.15718e-05	1.12619e-05	1.13033e-05	1.01087e-05	1.11772e-05	1.1413e-05	1.13381e-05	1.1122e-05	1.13059e-05	1.10918e-05	2.5405e-05	8.57424e-06	8.31941e-06	8.48609e-06	8.33166e-06	8.40543e-06	8.43703e-06	8.67661e-06	8.79145e-06	1.25189e-05	1.17142e-05	7.95243e-06	8.02223e-06	8.09506e-06	8.02988e-06	7.96119e-06	1.17575e-05
27.3438	8.6647e-06	8.41176e-06	8.59625e-06	8.41719e-06	8.49352e-06	8.51772e-06	8.75985e-06	8.88744e-06	1.60822e-05	1.51957e-05	8.06483e-06	8.14348e-06	8.21709e-06	8.13e-06	8.06581e-06	1.49507e-05		1.26358e-05	1.07992e-05	1.09348e-05	1.08403e-05	1.08334e-05	1.13581e-05	1.10704e-05	1.11237e-05	1.00195e-05	1.10344e-05	1.12695e-05	1.11779e-05	1.09536e-05	1.11511e-05	1.09319e-05	2.4389e-05	8.37459e-06	8.11234e-06	8.2638e-06	8.12209e-06	8.17917e-06	8.22301e-06	8.45723e-06	8.58649e-06	1.23006e-05	1.15258e-05	7.75781e-06	7.8495e-06	7.89744e-06	7.82372e-06	7.7657e-06	1.14133e-05
27.832	8.52043e-06	8.26353e-06	8.45571e-06	8.26819e-06	8.33989e-06	8.37434e-06	8.59864e-06	8.74036e-06	1.54086e-05	1.47868e-05	7.92613e-06	7.98846e-06	8.07065e-06	7.98734e-06	7.91565e-06	1.41752e-05		1.2437e-05	1.06211e-05	1.07578e-05	1.0658e-05	1.06386e-05	1.11483e-05	1.08735e-05	1.09279e-05	9.88048e-06	1.08381e-05	1.10813e-05	1.09864e-05	1.07582e-05	1.09664e-05	1.07419e-05	2.32237e-05	8.21478e-06	7.95121e-06	8.10623e-06	7.96016e-06	8.01753e-06	8.06212e-06	8.28486e-06	8.42758e-06	1.19502e-05	1.11936e-05	7.60104e-06	7.68029e-06	7.74009e-06	7.66483e-06	7.59855e-06	1.0909e-05
28.3203	8.34507e-06	8.08953e-06	8.28627e-06	8.08989e-06	8.16628e-06	8.20128e-06	8.40946e-06	8.57313e-06	1.51517e-05	1.42936e-05	7.75441e-06	7.82236e-06	7.90445e-06	7.82027e-06	7.74076e-06	1.37748e-05		1.23722e-05	1.05333e-05	1.06803e-05	1.05998e-05	1.0565e-05	1.10601e-05	1.0791e-05	1.08483e-05	9.84896e-06	1.07653e-05	1.0984e-05	1.08693e-05	1.06745e-05	1.08681e-05	1.06579e-05	2.21429e-05	8.06018e-06	7.79634e-06	7.94909e-06	7.80502e-06	7.86005e-06	7.90301e-06	8.11277e-06	8.27384e-06	1.16767e-05	1.08893e-05	7.46027e-06	7.52916e-06	7.60412e-06	7.52301e-06	7.45391e-06	1.0482e-05
28.8086	8.11614e-06	7.87941e-06	8.06536e-06	7.87931e-06	7.94363e-06	7.98928e-06	8.1722e-06	8.3359e-06	1.44667e-05	1.39367e-05	7.54173e-06	7.61179e-06	7.68839e-06	7.60452e-06	7.51282e-06	1.32212e-05		1.22194e-05	1.03888e-05	1.05302e-05	1.04694e-05	1.04238e-05	1.08905e-05	1.06309e-05	1.06822e-05	9.73033e-06	1.06019e-05	1.08305e-05	1.06993e-05	1.05157e-05	1.07008e-05	1.05038e-05	2.08131e-05	7.83255e-06	7.59166e-06	7.73932e-06	7.60219e-06	7.64635e-06	7.68908e-06	7.88119e-06	8.03489e-06	1.13728e-05	1.08067e-05	7.25815e-06	7.32487e-06	7.40177e-06	7.32442e-06	7.24469e-06	1.02032e-05
29.2969	7.91184e-06	7.687e-06	7.86921e-06	7.68339e-06	7.75707e-06	7.79976e-06	7.96727e-06	8.10911e-06	1.37403e-05	1.31573e-05	7.34658e-06	7.4123e-06	7.49542e-06	7.41206e-06	7.31832e-06	1.26173e-05		1.20137e-05	1.02483e-05	1.0388e-05	1.03339e-05	1.02917e-05	1.07445e-05	1.04907e-05	1.05342e-05	9.66742e-06	1.0457e-05	1.06858e-05	1.05628e-05	1.03745e-05	1.05527e-05	1.03497e-05	2.03438e-05	7.62931e-06	7.39464e-06	7.54589e-06	7.40266e-06	7.45027e-06	7.4955e-06	7.67153e-06	7.80672e-06	1.08354e-05	1.02416e-05	7.07383e-06	7.1273e-06	7.21702e-06	7.14317e-06	7.05688e-06	9.75001e-06
29.7852	7.67832e-06	7.4651e-06	7.63584e-06	7.46081e-06	7.54623e-06	7.57604e-06	7.73458e-06	7.85858e-06	1.31726e-05	1.24983e-05	7.14369e-06	7.19432e-06	7.28828e-06	7.19741e-06	7.1172e-06	1.21597e-05		1.17524e-05	1.0074e-05	1.021e-05	1.01646e-05	1.01342e-05	1.05654e-05	1.03274e-05	1.03664e-05	9.55479e-06	1.02884e-05	1.04757e-05	1.03678e-05	1.02171e-05	1.03584e-05	1.01843e-05	1.98835e-05	7.42242e-06	7.19536e-06	7.34227e-06	7.20456e-06	7.26532e-06	7.2947e-06	7.46288e-06	7.5892e-06	1.0233e-05	9.66709e-06	6.89607e-06	6.93621e-06	7.03422e-06	6.95828e-06	6.87813e-06	9.37814e-06
30.2734	7.46219e-06	7.25537e-06	7.42274e-06	7.25266e-06	7.34015e-06	7.3672e-06	7.52269e-06	7.62353e-06	1.25439e-05	1.21136e-05	6.94736e-06	7.00552e-06	7.08212e-06	6.99634e-06	6.9267e-06	1.18395e-05		1.15934e-05	9.98456e-06	1.01081e-05	1.00682e-05	1.00373e-05	1.04588e-05	1.02382e-05	1.02539e-05	9.49875e-06	1.01878e-05	1.03864e-05	1.02704e-05	1.01112e-05	1.02772e-05	1.00909e-05	1.9452e-05	7.20777e-06	6.99413e-06	7.1423e-06	6.9997e-06	7.07172e-06	7.09959e-06	7.2583e-06	7.35855e-06	9.46768e-06	9.12487e-06	6.70645e-06	6.74728e-06	6.82384e-06	6.75784e-06	6.68999e-06	8.92271e-06
30.7617	7.26782e-06	7.07946e-06	7.2388e-06	7.07418e-06	7.16677e-06	7.19326e-06	7.34193e-06	7.43346e-06	1.20968e-05	1.18095e-05	6.77445e-06	6.84021e-06	6.91625e-06	6.82028e-06	6.76893e-06	1.14841e-05		1.12326e-05	9.72739e-06	9.85773e-06	9.80812e-06	9.7805e-06	1.01972e-05	9.98776e-06	9.99138e-06	9.36005e-06	9.93203e-06	1.01378e-05	1.00295e-05	9.86102e-06	1.00398e-05	9.8396e-06	1.92301e-05	7.01827e-06	6.81626e-06	6.96348e-06	6.81642e-06	6.89692e-06	6.9292e-06	7.07279e-06	7.16395e-06	8.73658e-06	8.63174e-06	6.52574e-06	6.57982e-06	6.64735e-06	6.57423e-06	6.51589e-06	8.29902e-06
31.25	7.10557e-06	6.92387e-06	7.08468e-06	6.92012e-06	7.02556e-06	7.04631e-06	7.18694e-06	7.26967e-06	1.17372e-05	1.1249e-05	6.63116e-06	6.69384e-06	6.76563e-06	6.6619e-06	6.62462e-06	1.11993e-05		1.09591e-05	9.47396e-06	9.59531e-06	9.53299e-06	9.51047e-06	9.94388e-06	9.71876e-06	9.7332e-06	9.19553e-06	9.69465e-06	9.88003e-06	9.76483e-06	9.59866e-06	9.79064e-06	9.592e-06	1.90394e-05	6.86635e-06	6.67257e-06	6.81199e-06	6.67292e-06	6.76169e-06	6.78995e-06	6.92726e-06	7.01159e-06	8.32026e-06	8.25914e-06	6.38653e-06	6.445e-06	6.50536e-06	6.42058e-06	6.37869e-06	7.94426e-06
31.7383	6.87552e-06	6.69832e-06	6.8563e-06	6.69716e-06	6.79861e-06	6.81085e-06	6.95363e-06	7.03849e-06	1.1521e-05	1.10527e-05	6.42191e-06	6.48235e-06	6.55577e-06	6.44909e-06	6.4214e-06	1.09527e-05		1.07605e-05	9.3013e-06	9.42021e-06	9.35167e-06	9.3227e-06	9.75256e-06	9.54085e-06	9.54139e-06	9.04894e-06	9.50941e-06	9.70105e-06	9.58171e-06	9.41067e-06	9.61556e-06	9.416e-06	1.86548e-05	6.63773e-06	6.44761e-06	6.58284e-06	6.45095e-06	6.53554e-06	6.56035e-06	6.70373e-06	6.77638e-06	8.1418e-06	8.15847e-06	6.17772e-06	6.23259e-06	6.29675e-06	6.1983e-06	6.18104e-06	7.82256e-06
32.2266	6.74207e-06	6.57878e-06	6.72527e-06	6.58405e-06	6.67485e-06	6.68542e-06	6.82837e-06	6.90051e-06	1.14761e-05	1.07739e-05	6.30899e-06	6.36494e-06	6.43697e-06	6.33106e-06	6.31244e-06	1.0738e-05		1.03818e-05	8.9791e-06	9.08512e-06	9.02346e-06	8.99968e-06	9.40027e-06	9.19703e-06	9.19509e-06	8.7981e-06	9.16929e-06	9.35453e-06	9.2444e-06	9.07943e-06	9.267e-06	9.09168e-06	1.85797e-05	6.47757e-06	6.29859e-06	6.42892e-06	6.30416e-06	6.38614e-06	6.41147e-06	6.54807e-06	6.61876e-06	8.19081e-06	8.02991e-06	6.03195e-06	6.08346e-06	6.14731e-06	6.05574e-06	6.03939e-06	7.68823e-06
32.7148	6.51703e-06	6.36348e-06	6.51151e-06	6.3685e-06	6.46369e-06	6.46756e-06	6.60054e-06	6.67354e-06	1.14288e-05	1.06841e-05	6.12231e-06	6.15475e-06	6.22311e-06	6.14153e-06	6.12241e-06	1.04642e-05		1.01313e-05	8.74878e-06	8.83606e-06	8.78136e-06	8.75273e-06	9.14674e-06	8.95818e-06	8.95342e-06	8.62505e-06	8.94651e-06	9.1245e-06	8.99888e-06	8.84648e-06	9.02879e-06	8.85907e-06	1.83931e-05	6.25274e-06	6.09036e-06	6.2226e-06	6.09602e-06	6.17796e-06	6.19828e-06	6.33194e-06	6.3928e-06	8.1223e-06	7.95919e-06	5.83783e-06	5.87376e-06	5.93464e-06	5.85657e-06	5.84102e-06	7.53438e-06
33.2031	6.32702e-06	6.15571e-06	6.30406e-06	6.16473e-06	6.2503e-06	6.25136e-06	6.39291e-06	6.49306e-06	1.12472e-05	1.05422e-05	5.9572e-06	5.98055e-06	6.03479e-06	5.98006e-06	5.95762e-06	1.03034e-05		9.93297e-06	8.591e-06	8.67721e-06	8.63522e-06	8.60377e-06	8.98148e-06	8.8126e-06	8.79415e-06	8.4712e-06	8.78877e-06	8.9633e-06	8.84133e-06	8.68974e-06	8.8633e-06	8.71026e-06	1.80485e-05	6.10586e-06	5.93407e-06	6.0596e-06	5.94574e-06	6.01637e-06	6.03069e-06	6.17949e-06	6.25259e-06	8.17525e-06	7.89349e-06	5.71308e-06	5.74869e-06	5.79482e-06	5.73708e-06	5.72111e-06	7.5698e-06
33.6914	6.17168e-06	6.00922e-06	6.15296e-06	6.01693e-06	6.09054e-06	6.09369e-06	6.23691e-06	6.34614e-06	1.0942e-05	1.03974e-05	5.81229e-06	5.8311e-06	5.87484e-06	5.84242e-06	5.8104e-06	1.01096e-05		9.70652e-06	8.40171e-06	8.48377e-06	8.43424e-06	8.41044e-06	8.77627e-06	8.61126e-06	8.6009e-06	8.3326e-06	8.60446e-06	8.77904e-06	8.64747e-06	8.49509e-06	8.66472e-06	8.5225e-06	1.76757e-05	5.95835e-06	5.79696e-06	5.91729e-06	5.81029e-06	5.87563e-06	5.87968e-06	6.02687e-06	6.11975e-06	8.03111e-06	7.80929e-06	5.58759e-06	5.61749e-06	5.65275e-06	5.62201e-06	5.595e-06	7.41532e-06
34.1797	6.07249e-06	5.91722e-06	6.05895e-06	5.91964e-06	5.98916e-06	5.99603e-06	6.13733e-06	6.25236e-06	1.05382e-05	1.02439e-05	5.71157e-06	5.73592e-06	5.76071e-06	5.75141e-06	5.71438e-06	9.81958e-06		9.49523e-06	8.17045e-06	8.26252e-06	8.20884e-06	8.17943e-06	8.54697e-06	8.38564e-06	8.37311e-06	8.17421e-06	8.39078e-06	8.53899e-06	8.4367e-06	8.27509e-06	8.43832e-06	8.2902e-06	1.72313e-05	5.84611e-06	5.69355e-06	5.81131e-06	5.70617e-06	5.75814e-06	5.76199e-06	5.91241e-06	6.00267e-06	7.73278e-06	7.75276e-06	5.48345e-06	5.51727e-06	5.5293e-06	5.51672e-06	5.49083e-06	7.34509e-06
34.668	5.91996e-06	5.77058e-06	5.91486e-06	5.77627e-06	5.82951e-06	5.84888e-06	5.98425e-06	6.09421e-06	1.01936e-05	1.00528e-05	5.58507e-06	5.58989e-06	5.61654e-06	5.63012e-06	5.57094e-06	9.62459e-06		9.34614e-06	7.98344e-06	8.08108e-06	8.02212e-06	7.99247e-06	8.37105e-06	8.20062e-06	8.19416e-06	7.9994e-06	8.18786e-06	8.35176e-06	8.26264e-06	8.08653e-06	8.24916e-06	8.10357e-06	1.63741e-05	5.71126e-06	5.56347e-06	5.67789e-06	5.57765e-06	5.61196e-06	5.63059e-06	5.77661e-06	5.87241e-06	7.72765e-06	7.65957e-06	5.38026e-06	5.3933e-06	5.40673e-06	5.42127e-06	5.37686e-06	7.3424e-06
35.1562	5.84986e-06	5.70796e-06	5.8408e-06	5.7144e-06	5.75176e-06	5.77895e-06	5.9212e-06	6.02697e-06	9.99222e-06	9.63766e-06	5.52427e-06	5.51375e-06	5.55914e-06	5.56838e-06	5.50165e-06	9.32713e-06		9.17638e-06	7.8146e-06	7.9139e-06	7.84232e-06	7.80959e-06	8.20182e-06	8.01172e-06	8.01942e-06	7.8727e-06	8.00516e-06	8.16831e-06	8.09559e-06	7.90657e-06	8.07222e-06	7.9288e-06	1.61861e-05	5.63592e-06	5.49398e-06	5.6029e-06	5.5045e-06	5.52878e-06	5.55979e-06	5.69838e-06	5.80575e-06	7.55642e-06	7.37058e-06	5.2982e-06	5.30525e-06	5.33283e-06	5.3398e-06	5.28627e-06	7.02064e-06
35.6445	5.78771e-06	5.65482e-06	5.78416e-06	5.65683e-06	5.69359e-06	5.72243e-06	5.86271e-06	5.95174e-06	9.79969e-06	9.57867e-06	5.47139e-06	5.4437e-06	5.49664e-06	5.50507e-06	5.44174e-06	9.28953e-06		8.9241e-06	7.63413e-06	7.7292e-06	7.65481e-06	7.62136e-06	7.99394e-06	7.82303e-06	7.82092e-06	7.74191e-06	7.83448e-06	7.98638e-06	7.89719e-06	7.7177e-06	7.90452e-06	7.75184e-06	1.57549e-05	5.57429e-06	5.43889e-06	5.54817e-06	5.44255e-06	5.46515e-06	5.50223e-06	5.63606e-06	5.72767e-06	7.50543e-06	7.36762e-06	5.2422e-06	5.23129e-06	5.26519e-06	5.27428e-06	5.21962e-06	6.96967e-06
36.1328	5.71503e-06	5.57899e-06	5.70724e-06	5.58033e-06	5.61101e-06	5.64152e-06	5.77943e-06	5.86946e-06	9.64467e-06	9.41865e-06	5.4157e-06	5.37259e-06	5.44202e-06	5.45175e-06	5.38137e-06	9.19751e-06		8.77141e-06	7.51594e-06	7.60779e-06	7.54172e-06	7.50577e-06	7.88009e-06	7.69222e-06	7.6961e-06	7.68128e-06	7.73558e-06	7.88354e-06	7.78893e-06	7.60901e-06	7.81382e-06	7.65177e-06	1.54124e-05	5.52394e-06	5.3833e-06	5.49404e-06	5.38563e-06	5.40496e-06	5.44829e-06	5.57681e-06	5.67316e-06	7.42969e-06	7.07392e-06	5.20058e-06	5.17319e-06	5.22783e-06	5.23245e-06	5.17054e-06	6.76035e-06
36.6211	5.70446e-06	5.56097e-06	5.68019e-06	5.56389e-06	5.5955e-06	5.62571e-06	5.76379e-06	5.85679e-06	9.34868e-06	9.13368e-06	5.40573e-06	5.35815e-06	5.43695e-06	5.4475e-06	5.3779e-06	8.98749e-06		8.67668e-06	7.42509e-06	7.50669e-06	7.43182e-06	7.40906e-06	7.76498e-06	7.59547e-06	7.60528e-06	7.55921e-06	7.64244e-06	7.79858e-06	7.6784e-06	7.51465e-06	7.73334e-06	7.5678e-06	1.53764e-05	5.48872e-06	5.33769e-06	5.45069e-06	5.3414e-06	5.36305e-06	5.40864e-06	5.53526e-06	5.63714e-06	7.17273e-06	6.77756e-06	5.17028e-06	5.13289e-06	5.19872e-06	5.20281e-06	5.14363e-06	6.50541e-06
37.1094	5.65867e-06	5.51123e-06	5.6314e-06	5.51116e-06	5.54175e-06	5.57677e-06	5.70877e-06	5.78831e-06	8.99764e-06	8.88753e-06	5.36193e-06	5.31576e-06	5.38137e-06	5.40217e-06	5.33372e-06	8.79015e-06		8.49937e-06	7.30229e-06	7.37527e-06	7.29615e-06	7.28212e-06	7.63885e-06	7.46964e-06	7.47667e-06	7.44825e-06	7.54419e-06	7.68823e-06	7.56652e-06	7.40377e-06	7.64217e-06	7.45787e-06	1.51335e-05	5.44581e-06	5.29736e-06	5.41182e-06	5.29736e-06	5.32755e-06	5.36659e-06	5.49066e-06	5.57249e-06	7.02627e-06	6.7249e-06	5.12485e-06	5.09117e-06	5.15256e-06	5.16008e-06	5.09875e-06	6.42709e-06
37.5977	5.5537e-06	5.40084e-06	5.52764e-06	5.39975e-06	5.43759e-06	5.47466e-06	5.59355e-06	5.68201e-06	8.63605e-06	8.57359e-06	5.25574e-06	5.22495e-06	5.29131e-06	5.3155e-06	5.23654e-06	8.43654e-06		8.40582e-06	7.23788e-06	7.30037e-06	7.21723e-06	7.19637e-06	7.54878e-06	7.40014e-06	7.40963e-06	7.35971e-06	7.51019e-06	7.64124e-06	7.51918e-06	7.35371e-06	7.59851e-06	7.41077e-06	1.47083e-05	5.32981e-06	5.17612e-06	5.28969e-06	5.17395e-06	5.21208e-06	5.25052e-06	5.36773e-06	5.44779e-06	6.68652e-06	6.37813e-06	5.00745e-06	4.98745e-06	5.0511e-06	5.05474e-06	4.99349e-06	6.1572e-06
38.0859	5.40425e-06	5.25462e-06	5.37876e-06	5.25247e-06	5.30488e-06	5.32817e-06	5.4401e-06	5.53099e-06	8.46305e-06	8.37517e-06	5.12018e-06	5.07843e-06	5.15148e-06	5.18219e-06	5.10676e-06	8.17562e-06		8.31694e-06	7.13018e-06	7.19579e-06	7.10215e-06	7.07659e-06	7.44537e-06	7.28889e-06	7.31598e-06	7.19037e-06	7.39941e-06	7.53628e-06	7.39719e-06	7.24581e-06	7.49466e-06	7.30905e-06	1.44134e-05	5.18284e-06	5.03664e-06	5.15421e-06	5.03131e-06	5.0844e-06	5.11411e-06	5.22058e-06	5.30896e-06	6.38787e-06	6.26083e-06	4.86694e-06	4.84515e-06	4.91478e-06	4.91864e-06	4.86005e-06	5.95215e-06
38.5742	5.23725e-06	5.08314e-06	5.20307e-06	5.07621e-06	5.12901e-06	5.14218e-06	5.26011e-06	5.36413e-06	8.33173e-06	8.17371e-06	4.98444e-06	4.91941e-06	4.99087e-06	5.04716e-06	4.9635e-06	8.00172e-06		8.20135e-06	7.06743e-06	7.1209e-06	7.01896e-06	6.99289e-06	7.37414e-06	7.21906e-06	7.2574e-06	7.06854e-06	7.33885e-06	7.46581e-06	7.32584e-06	7.18235e-06	7.43684e-06	7.24494e-06	1.41553e-05	5.02401e-06	4.87177e-06	4.98322e-06	4.8633e-06	4.91752e-06	4.94303e-06	5.05337e-06	5.15018e-06	6.22949e-06	6.1985e-06	4.73863e-06	4.69672e-06	4.76797e-06	4.80418e-06	4.7256e-06	5.84348e-06
39.0625	5.06369e-06	4.91342e-06	5.03623e-06	4.90293e-06	4.96141e-06	4.97276e-06	5.09421e-06	5.22643e-06	8.14409e-06	8.03808e-06	4.8285e-06	4.75563e-06	4.82771e-06	4.91259e-06	4.81553e-06	7.78155e-06		8.05051e-06	6.94556e-06	6.99047e-06	6.89742e-06	6.86574e-06	7.24224e-06	7.0938e-06	7.13785e-06	6.91959e-06	7.2327e-06	7.35115e-06	7.1917e-06	7.06814e-06	7.31877e-06	7.13755e-06	1.37863e-05	4.87656e-06	4.72878e-06	4.83382e-06	4.71574e-06	4.77319e-06	4.79189e-06	4.90734e-06	5.0279e-06	5.93787e-06	6.01997e-06	4.6091e-06	4.55446e-06	4.62992e-06	4.7004e-06	4.605e-06	5.71405e-06
39.5508	4.87038e-06	4.7209e-06	4.83288e-06	4.71453e-06	4.77697e-06	4.77974e-06	4.9011e-06	5.06504e-06	7.84262e-06	7.79892e-06	4.66487e-06	4.58424e-06	4.65565e-06	4.76445e-06	4.66063e-06	7.54388e-06		7.85659e-06	6.76045e-06	6.80811e-06	6.7268e-06	6.69653e-06	7.06497e-06	6.91693e-06	6.95251e-06	6.69696e-06	7.02519e-06	7.15092e-06	7.0008e-06	6.86981e-06	7.11177e-06	6.93685e-06	1.33676e-05	4.69536e-06	4.54826e-06	4.64858e-06	4.54005e-06	4.59903e-06	4.61135e-06	4.72356e-06	4.87887e-06	5.75353e-06	5.93538e-06	4.45527e-06	4.39206e-06	4.46567e-06	4.56514e-06	4.45483e-06	5.70547e-06
40.0391	4.74339e-06	4.5997e-06	4.71306e-06	4.59647e-06	4.65969e-06	4.65598e-06	4.78559e-06	5.006e-06	7.81578e-06	7.752e-06	4.53926e-06	4.47487e-06	4.54132e-06	4.67383e-06	4.54779e-06	7.50528e-06		7.64527e-06	6.59125e-06	6.62776e-06	6.55286e-06	6.52089e-06	6.87874e-06	6.73602e-06	6.76767e-06	6.52534e-06	6.83196e-06	6.97861e-06	6.81882e-06	6.68498e-06	6.93697e-06	6.75888e-06	1.32024e-05	4.56854e-06	4.42684e-06	4.52288e-06	4.42212e-06	4.4797e-06	4.4854e-06	4.60176e-06	4.80315e-06	5.69777e-06	5.94003e-06	4.3301e-06	4.283e-06	4.35109e-06	4.47268e-06	4.3378e-06	5.61211e-06
40.5273	4.60627e-06	4.46782e-06	4.58582e-06	4.46972e-06	4.53979e-06	4.53426e-06	4.66121e-06	4.94365e-06	7.70039e-06	7.59355e-06	4.40434e-06	4.35606e-06	4.42077e-06	4.63496e-06	4.43796e-06	7.39358e-06		7.43941e-06	6.39745e-06	6.42939e-06	6.36844e-06	6.33522e-06	6.68062e-06	6.54943e-06	6.5679e-06	6.36791e-06	6.6719e-06	6.82079e-06	6.63649e-06	6.5066e-06	6.75348e-06	6.59106e-06	1.27479e-05	4.42706e-06	4.29031e-06	4.38609e-06	4.29064e-06	4.35099e-06	4.35154e-06	4.47861e-06	4.79819e-06	5.70772e-06	5.8191e-06	4.18761e-06	4.15942e-06	4.22471e-06	4.46764e-06	4.23748e-06	5.60584e-06
41.0156	4.48333e-06	4.3609e-06	4.47344e-06	4.36609e-06	4.43043e-06	4.42817e-06	4.55805e-06	4.88862e-06	7.59798e-06	7.4133e-06	4.28751e-06	4.24632e-06	4.31405e-06	4.6015e-06	4.3451e-06	7.30903e-06		7.25658e-06	6.21961e-06	6.25949e-06	6.2054e-06	6.16794e-06	6.49194e-06	6.36592e-06	6.37824e-06	6.15682e-06	6.46983e-06	6.62981e-06	6.45432e-06	6.31979e-06	6.55387e-06	6.39327e-06	1.24322e-05	4.28225e-06	4.15735e-06	4.25094e-06	4.15832e-06	4.21587e-06	4.21981e-06	4.34572e-06	4.72978e-06	5.69287e-06	5.70174e-06	4.03795e-06	4.02462e-06	4.08908e-06	4.42e-06	4.11352e-06	5.58366e-06
41.5039	4.3732e-06	4.25027e-06	4.36316e-06	4.25661e-06	4.3199e-06	4.31618e-06	4.44434e-06	4.78907e-06	7.54543e-06	7.13295e-06	4.17002e-06	4.14772e-06	4.20863e-06	4.51702e-06	4.24266e-06	7.20159e-06		7.09689e-06	6.08951e-06	6.12672e-06	6.06439e-06	6.03205e-06	6.33953e-06	6.22548e-06	6.23791e-06	5.99577e-06	6.32176e-06	6.46827e-06	6.30972e-06	6.16742e-06	6.39974e-06	6.23203e-06	1.22568e-05	4.17971e-06	4.0538e-06	4.1456e-06	4.05626e-06	4.10718e-06	4.11443e-06	4.23665e-06	4.59042e-06	5.63478e-06	5.49982e-06	3.93821e-06	3.9362e-06	3.98672e-06	4.29061e-06	4.01418e-06	5.42091e-06
41.9922	4.24325e-06	4.13354e-06	4.24267e-06	4.13708e-06	4.1947e-06	4.19324e-06	4.31947e-06	4.6457e-06	7.37884e-06	6.96473e-06	4.02874e-06	4.0183e-06	4.06742e-06	4.36373e-06	4.10208e-06	7.14651e-06		6.86433e-06	5.88432e-06	5.93289e-06	5.87926e-06	5.84572e-06	6.11669e-06	6.01812e-06	6.02699e-06	5.78341e-06	6.12514e-06	6.25167e-06	6.10148e-06	5.97116e-06	6.17022e-06	6.02062e-06	1.20503e-05	4.04593e-06	3.932e-06	4.02355e-06	3.93367e-06	3.97982e-06	3.99119e-06	4.11228e-06	4.47088e-06	5.53377e-06	5.44626e-06	3.79731e-06	3.80724e-06	3.84339e-06	4.16113e-06	3.88169e-06	5.44034e-06
42.4805	4.13376e-06	4.02199e-06	4.13013e-06	4.02405e-06	4.07253e-06	4.07918e-06	4.20492e-06	4.48246e-06	6.97642e-06	6.6944e-06	3.91567e-06	3.9142e-06	3.95466e-06	4.18106e-06	3.97233e-06	6.96809e-06		6.71855e-06	5.76069e-06	5.81788e-06	5.76393e-06	5.71842e-06	5.98796e-06	5.89078e-06	5.89068e-06	5.62755e-06	5.95375e-06	6.09137e-06	5.96648e-06	5.82821e-06	6.01743e-06	5.86736e-06	1.18244e-05	3.93131e-06	3.82018e-06	3.91176e-06	3.82101e-06	3.863e-06	3.8782e-06	3.99022e-06	4.24716e-06	5.27618e-06	5.136e-06	3.68632e-06	3.70157e-06	3.73066e-06	3.94251e-06	3.74302e-06	5.25862e-06
42.9688	4.01854e-06	3.91925e-06	4.02748e-06	3.92021e-06	3.96959e-06	3.97565e-06	4.07756e-06	4.29418e-06	6.70837e-06	6.62424e-06	3.77595e-06	3.798e-06	3.82317e-06	3.92708e-06	3.80535e-06	6.75326e-06		6.55964e-06	5.58976e-06	5.63671e-06	5.57778e-06	5.5483e-06	5.81193e-06	5.71027e-06	5.72578e-06	5.41684e-06	5.74457e-06	5.85986e-06	5.77764e-06	5.62406e-06	5.81378e-06	5.66784e-06	1.15463e-05	3.83518e-06	3.73566e-06	3.82739e-06	3.73691e-06	3.77652e-06	3.79159e-06	3.88748e-06	4.062e-06	5.02101e-06	4.94159e-06	3.57319e-06	3.61024e-06	3.62595e-06	3.68799e-06	3.60028e-06	4.96537e-06
43.457	3.89884e-06	3.81221e-06	3.92122e-06	3.80966e-06	3.85748e-06	3.86527e-06	3.95447e-06	4.11455e-06	6.49564e-06	6.52766e-06	3.65062e-06	3.68173e-06	3.69537e-06	3.72431e-06	3.65268e-06	6.49103e-06		6.39057e-06	5.46165e-06	5.50358e-06	5.44289e-06	5.41273e-06	5.67778e-06	5.56773e-06	5.57305e-06	5.23237e-06	5.59006e-06	5.69831e-06	5.62593e-06	5.4755e-06	5.64751e-06	5.52162e-06	1.11189e-05	3.71488e-06	3.6273e-06	3.71542e-06	3.62766e-06	3.66622e-06	3.68044e-06	3.76676e-06	3.92161e-06	4.82208e-06	4.8327e-06	3.45245e-06	3.49719e-06	3.5105e-06	3.52601e-06	3.46219e-06	4.82729e-06
43.9453	3.78438e-06	3.70828e-06	3.81428e-06	3.70555e-06	3.7481e-06	3.75703e-06	3.83603e-06	3.97724e-06	6.34143e-06	6.50767e-06	3.54018e-06	3.57885e-06	3.58357e-06	3.59589e-06	3.53429e-06	6.30454e-06		6.26128e-06	5.3396e-06	5.38193e-06	5.33932e-06	5.30497e-06	5.55874e-06	5.44413e-06	5.4425e-06	5.05526e-06	5.43438e-06	5.54821e-06	5.50101e-06	5.33609e-06	5.4971e-06	5.38265e-06	1.10064e-05	3.60237e-06	3.5288e-06	3.61424e-06	3.52894e-06	3.56386e-06	3.57538e-06	3.65205e-06	3.7796e-06	4.6873e-06	4.72881e-06	3.35035e-06	3.39432e-06	3.41063e-06	3.40751e-06	3.35216e-06	4.65937e-06
44.4336	3.66876e-06	3.61104e-06	3.71247e-06	3.60897e-06	3.65743e-06	3.65996e-06	3.72882e-06	3.83476e-06	6.29964e-06	6.53368e-06	3.42104e-06	3.47941e-06	3.47564e-06	3.45085e-06	3.40836e-06	6.18183e-06		6.1017e-06	5.21977e-06	5.26122e-06	5.21427e-06	5.18693e-06	5.45828e-06	5.30806e-06	5.30877e-06	4.86371e-06	5.28365e-06	5.38919e-06	5.35267e-06	5.17587e-06	5.33071e-06	5.2263e-06	1.08442e-05	3.50241e-06	3.44527e-06	3.52733e-06	3.44469e-06	3.48753e-06	3.49428e-06	3.55565e-06	3.6518e-06	4.64474e-06	4.73405e-06	3.24877e-06	3.30738e-06	3.31168e-06	3.28316e-06	3.2431e-06	4.57119e-06
44.9219	3.54867e-06	3.5107e-06	3.60218e-06	3.50495e-06	3.56476e-06	3.55427e-06	3.61878e-06	3.68047e-06	6.0433e-06	6.29633e-06	3.29866e-06	3.36299e-06	3.35903e-06	3.30763e-06	3.28735e-06	6.04867e-06		5.93688e-06	5.09643e-06	5.14844e-06	5.1034e-06	5.07167e-06	5.33147e-06	5.18984e-06	5.16411e-06	4.71909e-06	5.16603e-06	5.27472e-06	5.22908e-06	5.04985e-06	5.21143e-06	5.10038e-06	1.07143e-05	3.40259e-06	3.35956e-06	3.4377e-06	3.35568e-06	3.40829e-06	3.40638e-06	3.46364e-06	3.52671e-06	4.46451e-06	4.63252e-06	3.14667e-06	3.21101e-06	3.2128e-06	3.16247e-06	3.13849e-06	4.47606e-06
45.4102	3.48426e-06	3.45494e-06	3.54694e-06	3.44619e-06	3.51614e-06	3.49656e-06	3.56061e-06	3.5935e-06	5.83195e-06	6.12031e-06	3.23156e-06	3.29993e-06	3.30109e-06	3.23541e-06	3.22821e-06	5.9095e-06		5.75651e-06	4.94252e-06	5.00866e-06	4.97472e-06	4.93187e-06	5.18019e-06	5.04039e-06	5.00378e-06	4.57346e-06	5.01432e-06	5.12536e-06	5.08356e-06	4.89962e-06	5.05915e-06	4.94483e-06	1.04939e-05	3.32918e-06	3.2955e-06	3.37515e-06	3.28926e-06	3.35043e-06	3.34157e-06	3.39799e-06	3.43725e-06	4.35504e-06	4.57474e-06	3.07098e-06	3.13696e-06	3.14264e-06	3.08239e-06	3.07009e-06	4.45187e-06
45.8984	3.41384e-06	3.39238e-06	3.48144e-06	3.38295e-06	3.44805e-06	3.43124e-06	3.49732e-06	3.51234e-06	5.73284e-06	5.95779e-06	3.16175e-06	3.23019e-06	3.24289e-06	3.16338e-06	3.16304e-06	5.84121e-06		5.63215e-06	4.81766e-06	4.87804e-06	4.83839e-06	4.80324e-06	5.05577e-06	4.90209e-06	4.88414e-06	4.36506e-06	4.86273e-06	4.98465e-06	4.93813e-06	4.76681e-06	4.9144e-06	4.80569e-06	1.02326e-05	3.26078e-06	3.22876e-06	3.30776e-06	3.22108e-06	3.28054e-06	3.27287e-06	3.33133e-06	3.35463e-06	4.25156e-06	4.4565e-06	3.00377e-06	3.07032e-06	3.08299e-06	3.00899e-06	3.00374e-06	4.41412e-06
46.3867	3.31908e-06	3.30422e-06	3.39434e-06	3.29321e-06	3.35959e-06	3.34032e-06	3.40537e-06	3.4134e-06	5.77785e-06	5.70944e-06	3.07595e-06	3.13565e-06	3.15355e-06	3.07188e-06	3.07738e-06	5.78328e-06		5.50534e-06	4.70099e-06	4.75632e-06	4.71048e-06	4.68657e-06	4.93437e-06	4.782e-06	4.75785e-06	4.20164e-06	4.73188e-06	4.85268e-06	4.80498e-06	4.64145e-06	4.79073e-06	4.67541e-06	9.89962e-06	3.18059e-06	3.15433e-06	3.23618e-06	3.14614e-06	3.20468e-06	3.19126e-06	3.25526e-06	3.27088e-06	4.32997e-06	4.39632e-06	2.92721e-06	2.989e-06	3.00733e-06	2.92727e-06	2.93159e-06	4.4073e-06
46.875	3.27243e-06	3.25235e-06	3.348e-06	3.24484e-06	3.30473e-06	3.2818e-06	3.35055e-06	3.35858e-06	5.75805e-06	5.65051e-06	3.03e-06	3.08508e-06	3.10335e-06	3.02852e-06	3.03503e-06	5.67713e-06		5.40883e-06	4.61683e-06	4.66971e-06	4.62177e-06	4.60448e-06	4.84903e-06	4.69947e-06	4.68081e-06	4.04965e-06	4.61913e-06	4.72963e-06	4.70834e-06	4.56002e-06	4.67664e-06	4.56687e-06	9.67882e-06	3.1415e-06	3.11119e-06	3.19916e-06	3.10607e-06	3.15846e-06	3.14369e-06	3.2079e-06	3.21892e-06	4.35315e-06	4.33722e-06	2.88988e-06	2.94201e-06	2.96415e-06	2.88654e-06	2.8935e-06	4.34926e-06
47.3633	3.20324e-06	3.18273e-06	3.2794e-06	3.18016e-06	3.22885e-06	3.21666e-06	3.27987e-06	3.30319e-06	5.73424e-06	5.58839e-06	2.96363e-06	3.02096e-06	3.04144e-06	2.97171e-06	2.97203e-06	5.64495e-06		5.3259e-06	4.55164e-06	4.60841e-06	4.56994e-06	4.54814e-06	4.78274e-06	4.63033e-06	4.61628e-06	3.92775e-06	4.5422e-06	4.65359e-06	4.64084e-06	4.49874e-06	4.59483e-06	4.4932e-06	9.41091e-06	3.08572e-06	3.05264e-06	3.13959e-06	3.0502e-06	3.09539e-06	3.09084e-06	3.14977e-06	3.17517e-06	4.29863e-06	4.25718e-06	2.8364e-06	2.89156e-06	2.91559e-06	2.84361e-06	2.84138e-06	4.23013e-06
47.8516	3.17701e-06	3.15365e-06	3.24708e-06	3.15267e-06	3.1961e-06	3.18503e-06	3.24344e-06	3.2819e-06	5.68052e-06	5.46663e-06	2.92725e-06	2.99352e-06	3.00385e-06	2.93601e-06	2.93439e-06	5.51302e-06		5.24188e-06	4.46902e-06	4.52678e-06	4.4811e-06	4.46245e-06	4.68665e-06	4.54927e-06	4.5359e-06	3.81739e-06	4.45732e-06	4.56219e-06	4.55936e-06	4.41457e-06	4.50701e-06	4.40564e-06	9.28996e-06	3.039e-06	3.00495e-06	3.0879e-06	3.00509e-06	3.04183e-06	3.03884e-06	3.09451e-06	3.13553e-06	4.2417e-06	4.22232e-06	2.7848e-06	2.84681e-06	2.86355e-06	2.79024e-06	2.78807e-06	4.1564e-06
48.3398	3.13454e-06	3.10372e-06	3.1972e-06	3.1084e-06	3.15437e-06	3.13316e-06	3.19413e-06	3.24196e-06	5.5349e-06	5.46241e-06	2.89007e-06	2.95934e-06	2.96357e-06	2.89321e-06	2.89151e-06	5.39663e-06		5.1861e-06	4.42399e-06	4.48632e-06	4.44198e-06	4.41319e-06	4.62745e-06	4.5052e-06	4.48728e-06	3.74909e-06	4.42306e-06	4.52073e-06	4.51016e-06	4.36558e-06	4.47402e-06	4.37008e-06	9.30184e-06	3.01703e-06	2.97264e-06	3.0536e-06	2.97648e-06	3.01391e-06	3.00704e-06	3.06523e-06	3.11378e-06	4.11966e-06	4.12047e-06	2.75965e-06	2.83023e-06	2.84024e-06	2.76001e-06	2.76023e-06	3.97889e-06
48.8281	3.16203e-06	3.09517e-06	3.18254e-06	3.09794e-06	3.1414e-06	3.12211e-06	3.18385e-06	3.28953e-06	5.44275e-06	5.40616e-06	2.87791e-06	2.98417e-06	2.95117e-06	2.88582e-06	2.86905e-06	5.40975e-06		5.38218e-06	4.42022e-06	4.48179e-06	4.43702e-06	4.3921e-06	4.62163e-06	4.48694e-06	4.52579e-06	3.70595e-06	4.41925e-06	4.54525e-06	4.51957e-06	4.37874e-06	4.49965e-06	4.35921e-06	1.06034e-05	3.03002e-06	2.95108e-06	3.02551e-06	2.95265e-06	2.98746e-06	2.98277e-06	3.04447e-06	3.14818e-06	4.06874e-06	4.04544e-06	2.73587e-06	2.84449e-06	2.81372e-06	2.74321e-06	2.72606e-06	3.93774e-06
49.3164	3.31224e-06	3.11567e-06	3.19454e-06	3.11107e-06	3.14856e-06	3.12454e-06	3.19177e-06	3.4952e-06	5.82281e-06	5.72544e-06	2.90539e-06	3.1071e-06	2.95605e-06	2.91337e-06	2.86308e-06	5.92092e-06		6.11855e-06	4.49415e-06	4.52566e-06	4.4577e-06	4.40226e-06	4.68841e-06	4.53248e-06	4.72313e-06	3.7582e-06	4.48455e-06	4.67834e-06	4.62632e-06	4.48805e-06	4.64241e-06	4.39711e-06	1.45742e-05	3.18123e-06	2.97868e-06	3.04275e-06	2.97303e-06	3.00165e-06	2.98968e-06	3.06271e-06	3.36113e-06	4.35619e-06	4.35014e-06	2.76132e-06	2.97122e-06	2.82266e-06	2.77561e-06	2.72517e-06	4.426e-06
49.8047	3.27803e-06	3.07279e-06	3.15422e-06	3.06571e-06	3.11072e-06	3.0796e-06	3.14747e-06	3.45766e-06	5.71382e-06	5.65871e-06	2.86751e-06	3.07916e-06	2.91798e-06	2.87539e-06	2.82543e-06	5.83741e-06		6.13578e-06	4.48095e-06	4.51732e-06	4.44844e-06	4.39626e-06	4.69655e-06	4.52494e-06	4.7178e-06	3.72775e-06	4.46837e-06	4.67257e-06	4.61581e-06	4.48172e-06	4.63511e-06	4.3916e-06	1.48765e-05	3.16653e-06	2.95735e-06	3.0224e-06	2.949e-06	2.98848e-06	2.96468e-06	3.03813e-06	3.3444e-06	4.24538e-06	4.30647e-06	2.74099e-06	2.95866e-06	2.79788e-06	2.74992e-06	2.69819e-06	4.37728e-06
50.293	3.20985e-06	3.00834e-06	3.09005e-06	2.99932e-06	3.04823e-06	3.0192e-06	3.08318e-06	3.38787e-06	5.46484e-06	5.45936e-06	2.80072e-06	3.01755e-06	2.84971e-06	2.81047e-06	2.76098e-06	5.69082e-06		6.09457e-06	4.43158e-06	4.46742e-06	4.40814e-06	4.35293e-06	4.63804e-06	4.47394e-06	4.67255e-06	3.67557e-06	4.42001e-06	4.62404e-06	4.57868e-06	4.44043e-06	4.57835e-06	4.33868e-06	1.47969e-05	3.10137e-06	2.89556e-06	2.96354e-06	2.88507e-06	2.92966e-06	2.90834e-06	2.97629e-06	3.28447e-06	4.13401e-06	4.17963e-06	2.68226e-06	2.90042e-06	2.73698e-06	2.69584e-06	2.64374e-06	4.27293e-06
50.7812	3.14946e-06	2.95111e-06	3.03396e-06	2.94147e-06	2.98851e-06	2.967e-06	3.02518e-06	3.32722e-06	5.25828e-06	5.28592e-06	2.74481e-06	2.96051e-06	2.79487e-06	2.75827e-06	2.70905e-06	5.48073e-06		6.01481e-06	4.37685e-06	4.41229e-06	4.3508e-06	4.2962e-06	4.58329e-06	4.41907e-06	4.5989e-06	3.62553e-06	4.35549e-06	4.54338e-06	4.52097e-06	4.37138e-06	4.48415e-06	4.26375e-06	1.44173e-05	3.04289e-06	2.83838e-06	2.90771e-06	2.82663e-06	2.87436e-06	2.85568e-06	2.91526e-06	3.22085e-06	3.9989e-06	4.12103e-06	2.62815e-06	2.84534e-06	2.68491e-06	2.64157e-06	2.59234e-06	4.15697e-06
51.2695	2.84056e-06	2.80656e-06	2.89607e-06	2.80318e-06	2.87004e-06	2.84435e-06	2.89308e-06	2.94849e-06	4.62916e-06	4.75644e-06	2.60307e-06	2.69328e-06	2.67379e-06	2.59936e-06	2.60139e-06	4.64706e-06		4.99015e-06	4.18546e-06	4.25289e-06	4.22564e-06	4.18619e-06	4.40169e-06	4.25691e-06	4.23374e-06	3.38061e-06	4.15293e-06	4.25128e-06	4.26532e-06	4.10836e-06	4.18846e-06	4.10144e-06	9.3534e-06	2.74518e-06	2.70321e-06	2.7812e-06	2.69701e-06	2.76402e-06	2.74553e-06	2.78945e-06	2.85104e-06	3.4772e-06	3.64928e-06	2.49165e-06	2.5856e-06	2.56674e-06	2.49067e-06	2.49191e-06	3.4367e-06
51.7578	2.73164e-06	2.71518e-06	2.79961e-06	2.71356e-06	2.77455e-06	2.75488e-06	2.80194e-06	2.82695e-06	4.4205e-06	4.63066e-06	2.51788e-06	2.59351e-06	2.58438e-06	2.5112e-06	2.51278e-06	4.47825e-06		4.83303e-06	4.11963e-06	4.18843e-06	4.16347e-06	4.12552e-06	4.31669e-06	4.18748e-06	4.16748e-06	3.29647e-06	4.07967e-06	4.16589e-06	4.19497e-06	4.03673e-06	4.10653e-06	4.03147e-06	8.50572e-06	2.64204e-06	2.61519e-06	2.69062e-06	2.61242e-06	2.67347e-06	2.65966e-06	2.70387e-06	2.73632e-06	3.2853e-06	3.45883e-06	2.41576e-06	2.49434e-06	2.49082e-06	2.41606e-06	2.41864e-06	3.27753e-06
52.2461	2.69268e-06	2.67089e-06	2.74749e-06	2.66834e-06	2.72338e-06	2.71106e-06	2.75768e-06	2.78553e-06	4.43602e-06	4.62099e-06	2.48212e-06	2.55539e-06	2.54787e-06	2.47403e-06	2.48122e-06	4.46011e-06		4.79862e-06	4.10775e-06	4.1712e-06	4.14074e-06	4.10273e-06	4.30116e-06	4.17184e-06	4.15552e-06	3.25711e-06	4.06544e-06	4.14239e-06	4.17416e-06	4.01813e-06	4.08542e-06	4.01307e-06	8.11975e-06	2.59535e-06	2.56566e-06	2.6361e-06	2.56322e-06	2.62066e-06	2.61112e-06	2.65416e-06	2.68597e-06	3.25369e-06	3.41494e-06	2.37249e-06	2.44914e-06	2.44708e-06	2.37036e-06	2.37658e-06	3.1935e-06
52.7344	2.64348e-06	2.61771e-06	2.69464e-06	2.61528e-06	2.66791e-06	2.65499e-06	2.70101e-06	2.72984e-06	4.4767e-06	4.6535e-06	2.44304e-06	2.50525e-06	2.49824e-06	2.43324e-06	2.43769e-06	4.45936e-06		4.75738e-06	4.0923e-06	4.15443e-06	4.12607e-06	4.09596e-06	4.29659e-06	4.16606e-06	4.15213e-06	3.217e-06	4.04286e-06	4.12627e-06	4.14997e-06	4.00764e-06	4.07627e-06	3.9992e-06	7.84254e-06	2.54164e-06	2.5104e-06	2.5779e-06	2.51019e-06	2.55786e-06	2.55075e-06	2.59525e-06	2.62477e-06	3.28967e-06	3.41606e-06	2.32863e-06	2.39403e-06	2.39538e-06	2.32546e-06	2.32646e-06	3.19563e-06
53.2227	2.58751e-06	2.56413e-06	2.63749e-06	2.56327e-06	2.61127e-06	2.60227e-06	2.64432e-06	2.67691e-06	4.51308e-06	4.62255e-06	2.38878e-06	2.45278e-06	2.44487e-06	2.38295e-06	2.38705e-06	4.43709e-06		4.73123e-06	4.06432e-06	4.12385e-06	4.08945e-06	4.06813e-06	4.26817e-06	4.13752e-06	4.13093e-06	3.1726e-06	4.00548e-06	4.0959e-06	4.11645e-06	3.97288e-06	4.0448e-06	3.96654e-06	7.51335e-06	2.48349e-06	2.45596e-06	2.51831e-06	2.45781e-06	2.50237e-06	2.49482e-06	2.53877e-06	2.5708e-06	3.29878e-06	3.45214e-06	2.27744e-06	2.33909e-06	2.34142e-06	2.27595e-06	2.27592e-06	3.18324e-06
53.7109	2.52167e-06	2.50205e-06	2.57399e-06	2.50102e-06	2.54758e-06	2.54331e-06	2.58007e-06	2.61928e-06	4.41e-06	4.48437e-06	2.32807e-06	2.39016e-06	2.38285e-06	2.3293e-06	2.32569e-06	4.28037e-06		4.68479e-06	4.03564e-06	4.09144e-06	4.06215e-06	4.03591e-06	4.22603e-06	4.11064e-06	4.0869e-06	3.17524e-06	3.99011e-06	4.08153e-06	4.09058e-06	3.9429e-06	4.02124e-06	3.93733e-06	7.23355e-06	2.41273e-06	2.39127e-06	2.45105e-06	2.39523e-06	2.43754e-06	2.43031e-06	2.4702e-06	2.50495e-06	3.24819e-06	3.40641e-06	2.21061e-06	2.27479e-06	2.27814e-06	2.21444e-06	2.2114e-06	3.09556e-06
54.1992	2.45887e-06	2.44475e-06	2.51678e-06	2.44342e-06	2.49448e-06	2.48386e-06	2.51365e-06	2.54904e-06	4.43299e-06	4.46401e-06	2.26985e-06	2.32634e-06	2.32162e-06	2.27283e-06	2.26214e-06	4.2427e-06		4.66822e-06	4.01829e-06	4.07788e-06	4.05071e-06	4.02181e-06	4.20545e-06	4.08872e-06	4.05708e-06	3.13275e-06	3.96934e-06	4.07219e-06	4.06654e-06	3.9095e-06	4.00986e-06	3.91711e-06	7.05561e-06	2.35964e-06	2.34116e-06	2.40243e-06	2.34446e-06	2.3869e-06	2.3792e-06	2.41167e-06	2.44666e-06	3.23824e-06	3.40004e-06	2.15747e-06	2.22016e-06	2.2252e-06	2.16494e-06	2.15569e-06	3.09483e-06
54.6875	2.40966e-06	2.39388e-06	2.46826e-06	2.39378e-06	2.44529e-06	2.43014e-06	2.46307e-06	2.49725e-06	4.29266e-06	4.39343e-06	2.22465e-06	2.27881e-06	2.27965e-06	2.22519e-06	2.218e-06	4.12047e-06		4.61981e-06	3.98376e-06	4.04528e-06	4.01089e-06	3.98732e-06	4.16623e-06	4.04569e-06	4.02048e-06	3.08812e-06	3.93792e-06	4.02995e-06	4.03531e-06	3.87608e-06	3.97515e-06	3.8892e-06	6.88804e-06	2.30939e-06	2.28907e-06	2.35089e-06	2.2938e-06	2.33909e-06	2.32538e-06	2.36027e-06	2.39375e-06	3.20104e-06	3.32564e-06	2.11724e-06	2.1749e-06	2.18432e-06	2.12001e-06	2.11225e-06	3.03513e-06
55.1758	2.36906e-06	2.35388e-06	2.42814e-06	2.35479e-06	2.41316e-06	2.38677e-06	2.41733e-06	2.44482e-06	4.11545e-06	4.25672e-06	2.18859e-06	2.2438e-06	2.24692e-06	2.18225e-06	2.17988e-06	3.99879e-06		4.55075e-06	3.93559e-06	4.00518e-06	3.97454e-06	3.94754e-06	4.10634e-06	3.99757e-06	3.96066e-06	3.05036e-06	3.89948e-06	3.9949e-06	3.98481e-06	3.8252e-06	3.93465e-06	3.84974e-06	6.68771e-06	2.27707e-06	2.25659e-06	2.31718e-06	2.26109e-06	2.31353e-06	2.29366e-06	2.32391e-06	2.35274e-06	3.10464e-06	3.20418e-06	2.08918e-06	2.14667e-06	2.15723e-06	2.09064e-06	2.08286e-06	2.96085e-06
55.6641	2.31438e-06	2.30077e-06	2.37811e-06	2.29973e-06	2.36117e-06	2.33018e-06	2.35918e-06	2.38468e-06	4.21413e-06	4.22723e-06	2.14176e-06	2.19298e-06	2.19985e-06	2.13742e-06	2.13609e-06	4.05389e-06		4.52433e-06	3.91908e-06	3.99194e-06	3.96247e-06	3.93142e-06	4.09369e-06	3.98103e-06	3.94707e-06	2.97271e-06	3.85851e-06	3.95629e-06	3.96346e-06	3.80342e-06	3.90146e-06	3.82636e-06	6.61636e-06	2.22331e-06	2.20348e-06	2.26777e-06	2.2066e-06	2.26262e-06	2.23772e-06	2.26761e-06	2.29388e-06	3.13037e-06	3.14258e-06	2.03584e-06	2.093e-06	2.10498e-06	2.04004e-06	2.03342e-06	2.9385e-06
56.1523	2.28412e-06	2.26965e-06	2.35109e-06	2.26947e-06	2.3282e-06	2.29692e-06	2.32982e-06	2.35901e-06	4.19063e-06	4.15129e-06	2.11398e-06	2.16438e-06	2.17297e-06	2.11484e-06	2.11226e-06	4.01859e-06		4.49195e-06	3.91569e-06	3.98128e-06	3.94747e-06	3.92378e-06	4.09594e-06	3.97644e-06	3.94244e-06	2.94656e-06	3.83741e-06	3.93442e-06	3.94654e-06	3.79795e-06	3.89073e-06	3.81205e-06	6.51519e-06	2.20289e-06	2.18227e-06	2.2489e-06	2.18419e-06	2.24164e-06	2.21691e-06	2.24895e-06	2.27658e-06	3.11155e-06	3.10084e-06	2.01485e-06	2.072e-06	2.0833e-06	2.01878e-06	2.01415e-06	2.9032e-06
56.6406	2.23789e-06	2.22401e-06	2.30113e-06	2.22303e-06	2.2802e-06	2.2573e-06	2.28648e-06	2.31546e-06	4.15949e-06	4.10156e-06	2.07219e-06	2.11774e-06	2.13074e-06	2.0749e-06	2.0718e-06	3.97974e-06		4.44733e-06	3.89338e-06	3.963e-06	3.93598e-06	3.90875e-06	4.07078e-06	3.95849e-06	3.92031e-06	2.9221e-06	3.80942e-06	3.91231e-06	3.92276e-06	3.77911e-06	3.85801e-06	3.78848e-06	6.42446e-06	2.15159e-06	2.13356e-06	2.1968e-06	2.13466e-06	2.19029e-06	2.16981e-06	2.20025e-06	2.22814e-06	2.99002e-06	3.0169e-06	1.97136e-06	2.02313e-06	2.03767e-06	1.9712e-06	1.96793e-06	2.86376e-06
57.1289	2.20168e-06	2.18967e-06	2.26406e-06	2.18839e-06	2.2402e-06	2.22149e-06	2.24921e-06	2.27798e-06	4.12545e-06	3.98518e-06	2.03521e-06	2.08058e-06	2.0927e-06	2.03418e-06	2.03139e-06	3.94914e-06		4.41478e-06	3.86325e-06	3.92692e-06	3.90271e-06	3.87294e-06	4.03206e-06	3.92593e-06	3.89462e-06	2.87833e-06	3.78062e-06	3.88648e-06	3.89218e-06	3.75078e-06	3.83282e-06	3.75841e-06	6.34558e-06	2.11316e-06	2.09839e-06	2.16111e-06	2.09903e-06	2.15136e-06	2.13336e-06	2.16344e-06	2.18864e-06	2.92596e-06	2.91798e-06	1.9316e-06	1.98515e-06	2.00106e-06	1.93099e-06	1.92841e-06	2.85245e-06
57.6172	2.17685e-06	2.16674e-06	2.2413e-06	2.1666e-06	2.22126e-06	2.20103e-06	2.22637e-06	2.25198e-06	4.03425e-06	3.89352e-06	2.0111e-06	2.05236e-06	2.06599e-06	2.00631e-06	2.00274e-06	3.806e-06		4.38168e-06	3.84485e-06	3.90603e-06	3.87449e-06	3.85338e-06	3.9964e-06	3.90333e-06	3.87491e-06	2.85822e-06	3.76011e-06	3.86999e-06	3.87138e-06	3.72966e-06	3.81957e-06	3.74203e-06	6.25191e-06	2.09421e-06	2.08023e-06	2.14219e-06	2.08121e-06	2.13149e-06	2.11751e-06	2.14458e-06	2.15964e-06	2.86964e-06	2.86216e-06	1.9187e-06	1.96565e-06	1.98415e-06	1.91184e-06	1.91148e-06	2.75891e-06
58.1055	2.14636e-06	2.13013e-06	2.20141e-06	2.13169e-06	2.18724e-06	2.16312e-06	2.1916e-06	2.20684e-06	3.88706e-06	3.83482e-06	1.98236e-06	2.02307e-06	2.03981e-06	1.97554e-06	1.97506e-06	3.7141e-06		4.32596e-06	3.8029e-06	3.86808e-06	3.84049e-06	3.82429e-06	3.96181e-06	3.8659e-06	3.83972e-06	2.81013e-06	3.72758e-06	3.83496e-06	3.8283e-06	3.69074e-06	3.78438e-06	3.71495e-06	6.04961e-06	2.0644e-06	2.04793e-06	2.10561e-06	2.05031e-06	2.09755e-06	2.08317e-06	2.11109e-06	2.12372e-06	2.75943e-06	2.81435e-06	1.89751e-06	1.94192e-06	1.96131e-06	1.88713e-06	1.89042e-06	2.72202e-06
58.5938	2.09844e-06	2.08622e-06	2.15125e-06	2.0876e-06	2.14516e-06	2.11689e-06	2.14294e-06	2.1591e-06	3.85421e-06	3.72339e-06	1.94672e-06	1.9828e-06	1.99897e-06	1.9379e-06	1.93937e-06	3.62774e-06		4.24869e-06	3.72773e-06	3.79164e-06	3.76886e-06	3.74682e-06	3.88176e-06	3.78991e-06	3.75701e-06	2.74579e-06	3.658e-06	3.76639e-06	3.75523e-06	3.61936e-06	3.71688e-06	3.65163e-06	5.89374e-06	2.02167e-06	2.00545e-06	2.06187e-06	2.00776e-06	2.0573e-06	2.04025e-06	2.06551e-06	2.07758e-06	2.73957e-06	2.80219e-06	1.86555e-06	1.90395e-06	1.92525e-06	1.85767e-06	1.86085e-06	2.69758e-06
59.082	2.08096e-06	2.06804e-06	2.13456e-06	2.07054e-06	2.12762e-06	2.10024e-06	2.12416e-06	2.14606e-06	3.72924e-06	3.71708e-06	1.92685e-06	1.97201e-06	1.98525e-06	1.92111e-06	1.9253e-06	3.54354e-06		4.18192e-06	3.67463e-06	3.74842e-06	3.71765e-06	3.7041e-06	3.83278e-06	3.7476e-06	3.70856e-06	2.70717e-06	3.60258e-06	3.70392e-06	3.69692e-06	3.57085e-06	3.6598e-06	3.60144e-06	5.78092e-06	2.00207e-06	1.98407e-06	2.04063e-06	1.98804e-06	2.03254e-06	2.01821e-06	2.04323e-06	2.06087e-06	2.72789e-06	2.7816e-06	1.84448e-06	1.88909e-06	1.90605e-06	1.8392e-06	1.84256e-06	2.63926e-06
59.5703	2.0636e-06	2.04426e-06	2.10631e-06	2.04782e-06	2.10139e-06	2.07408e-06	2.10538e-06	2.13155e-06	3.67633e-06	3.67434e-06	1.90019e-06	1.95439e-06	1.96232e-06	1.89832e-06	1.90248e-06	3.52466e-06		4.13534e-06	3.63339e-06	3.7063e-06	3.67617e-06	3.66557e-06	3.79281e-06	3.70513e-06	3.67101e-06	2.65297e-06	3.57177e-06	3.65995e-06	3.6594e-06	3.53459e-06	3.61987e-06	3.55863e-06	5.74791e-06	1.97806e-06	1.95331e-06	2.0045e-06	1.95847e-06	1.99999e-06	1.98242e-06	2.01584e-06	2.04205e-06	2.69905e-06	2.78359e-06	1.81295e-06	1.863e-06	1.87738e-06	1.8105e-06	1.81555e-06	2.6552e-06
60.0586	2.02784e-06	2.00775e-06	2.06736e-06	2.01084e-06	2.06112e-06	2.03633e-06	2.06993e-06	2.0994e-06	3.64123e-06	3.6041e-06	1.85614e-06	1.91579e-06	1.92227e-06	1.86304e-06	1.86418e-06	3.48516e-06		4.09366e-06	3.58519e-06	3.65875e-06	3.63463e-06	3.61499e-06	3.74147e-06	3.6581e-06	3.61467e-06	2.60813e-06	3.5242e-06	3.60503e-06	3.61248e-06	3.48756e-06	3.56498e-06	3.5101e-06	5.66414e-06	1.95021e-06	1.92373e-06	1.97504e-06	1.92828e-06	1.97106e-06	1.95252e-06	1.99045e-06	2.01886e-06	2.71365e-06	2.76419e-06	1.77655e-06	1.83157e-06	1.84464e-06	1.78437e-06	1.7865e-06	2.62983e-06
60.5469	2.00518e-06	1.98636e-06	2.05041e-06	1.98884e-06	2.03678e-06	2.01756e-06	2.04979e-06	2.0832e-06	3.61643e-06	3.53585e-06	1.81929e-06	1.8921e-06	1.89618e-06	1.83128e-06	1.82816e-06	3.48418e-06		4.0376e-06	3.53694e-06	3.60654e-06	3.58634e-06	3.56513e-06	3.6894e-06	3.60197e-06	3.56844e-06	2.58359e-06	3.46916e-06	3.54723e-06	3.5643e-06	3.43478e-06	3.51144e-06	3.45373e-06	5.56866e-06	1.92689e-06	1.90346e-06	1.95619e-06	1.90725e-06	1.94908e-06	1.93378e-06	1.97034e-06	1.99951e-06	2.6727e-06	2.67613e-06	1.74203e-06	1.80795e-06	1.81759e-06	1.75372e-06	1.75495e-06	2.60045e-06
61.0352	1.95915e-06	1.94094e-06	2.00156e-06	1.94575e-06	1.9912e-06	1.97053e-06	2.00566e-06	2.04423e-06	3.5694e-06	3.43432e-06	1.77812e-06	1.85198e-06	1.85252e-06	1.80056e-06	1.78879e-06	3.38165e-06		3.97495e-06	3.48346e-06	3.54354e-06	3.52932e-06	3.50819e-06	3.64444e-06	3.53249e-06	3.50155e-06	2.54251e-06	3.41394e-06	3.49278e-06	3.50221e-06	3.3751e-06	3.45766e-06	3.39957e-06	5.41878e-06	1.88408e-06	1.86331e-06	1.91443e-06	1.86863e-06	1.91303e-06	1.89332e-06	1.9312e-06	1.97179e-06	2.60354e-06	2.62685e-06	1.70507e-06	1.76823e-06	1.77952e-06	1.7301e-06	1.7223e-06	2.50248e-06
61.5234	1.91022e-06	1.89647e-06	1.95505e-06	1.90034e-06	1.94581e-06	1.92867e-06	1.95795e-06	2.00612e-06	3.49407e-06	3.32209e-06	1.73695e-06	1.81102e-06	1.81004e-06	1.77535e-06	1.75644e-06	3.33072e-06		3.89549e-06	3.4171e-06	3.4722e-06	3.47388e-06	3.44264e-06	3.57397e-06	3.46867e-06	3.43068e-06	2.50039e-06	3.35308e-06	3.43319e-06	3.44528e-06	3.31679e-06	3.40463e-06	3.345e-06	5.29874e-06	1.8328e-06	1.81485e-06	1.86731e-06	1.81918e-06	1.86831e-06	1.84664e-06	1.87927e-06	1.93149e-06	2.52161e-06	2.52921e-06	1.65683e-06	1.72045e-06	1.73269e-06	1.70756e-06	1.68493e-06	2.434e-06
62.0117	1.85147e-06	1.84474e-06	1.90552e-06	1.84797e-06	1.89585e-06	1.87431e-06	1.89854e-06	1.95154e-06	3.42503e-06	3.22699e-06	1.69051e-06	1.75847e-06	1.76157e-06	1.73175e-06	1.71169e-06	3.29253e-06		3.83565e-06	3.36394e-06	3.41116e-06	3.42064e-06	3.38659e-06	3.51342e-06	3.4125e-06	3.38179e-06	2.45309e-06	3.29225e-06	3.37538e-06	3.39127e-06	3.2591e-06	3.3479e-06	3.27934e-06	5.16334e-06	1.77171e-06	1.7602e-06	1.81291e-06	1.76399e-06	1.81467e-06	1.79339e-06	1.81918e-06	1.87369e-06	2.46531e-06	2.41801e-06	1.60731e-06	1.66614e-06	1.68027e-06	1.65243e-06	1.6317e-06	2.35143e-06
62.5	1.8198e-06	1.81538e-06	1.87305e-06	1.82025e-06	1.86715e-06	1.8442e-06	1.87127e-06	1.92129e-06	3.36082e-06	3.17319e-06	1.66688e-06	1.7312e-06	1.73968e-06	1.70869e-06	1.68875e-06	3.22399e-06		3.76375e-06	3.3111e-06	3.35889e-06	3.36757e-06	3.34208e-06	3.45548e-06	3.36111e-06	3.32071e-06	2.41096e-06	3.24307e-06	3.33066e-06	3.33768e-06	3.21361e-06	3.30264e-06	3.22581e-06	5.07889e-06	1.7311e-06	1.72147e-06	1.7721e-06	1.72694e-06	1.77762e-06	1.75539e-06	1.78112e-06	1.84452e-06	2.39706e-06	2.37654e-06	1.57468e-06	1.62955e-06	1.64832e-06	1.61776e-06	1.59793e-06	2.2874e-06
62.9883	1.77457e-06	1.77122e-06	1.82944e-06	1.77503e-06	1.82441e-06	1.8012e-06	1.826e-06	1.86283e-06	3.18972e-06	3.14237e-06	1.61902e-06	1.6832e-06	1.6949e-06	1.66574e-06	1.64895e-06	3.15576e-06		3.73009e-06	3.27672e-06	3.32752e-06	3.33872e-06	3.31196e-06	3.42098e-06	3.32689e-06	3.29362e-06	2.37892e-06	3.21746e-06	3.3038e-06	3.30239e-06	3.18621e-06	3.27415e-06	3.19707e-06	4.99637e-06	1.68973e-06	1.67922e-06	1.73069e-06	1.68475e-06	1.73425e-06	1.71501e-06	1.73859e-06	1.78458e-06	2.30188e-06	2.29461e-06	1.53164e-06	1.58863e-06	1.60979e-06	1.58464e-06	1.56522e-06	2.19966e-06
63.4766	1.72434e-06	1.7207e-06	1.7805e-06	1.72435e-06	1.77419e-06	1.752e-06	1.77581e-06	1.80029e-06	3.11591e-06	3.16115e-06	1.56635e-06	1.62904e-06	1.642e-06	1.59854e-06	1.59285e-06	3.09191e-06		3.68166e-06	3.2288e-06	3.27849e-06	3.28004e-06	3.2583e-06	3.3753e-06	3.27327e-06	3.24761e-06	2.3385e-06	3.15082e-06	3.23507e-06	3.23677e-06	3.12739e-06	3.20328e-06	3.13386e-06	4.84364e-06	1.64147e-06	1.63331e-06	1.68585e-06	1.63919e-06	1.68733e-06	1.67002e-06	1.69033e-06	1.72134e-06	2.23839e-06	2.3202e-06	1.4851e-06	1.54019e-06	1.56141e-06	1.51584e-06	1.50955e-06	2.1678e-06
63.9648	1.6743e-06	1.67135e-06	1.73141e-06	1.6761e-06	1.72333e-06	1.70163e-06	1.72749e-06	1.74805e-06	3.04699e-06	3.17915e-06	1.51584e-06	1.57867e-06	1.58974e-06	1.53499e-06	1.53391e-06	3.02106e-06		3.63034e-06	3.17355e-06	3.22337e-06	3.21035e-06	3.1972e-06	3.32589e-06	3.21753e-06	3.19996e-06	2.29121e-06	3.09401e-06	3.18143e-06	3.17408e-06	3.07529e-06	3.15112e-06	3.08768e-06	4.75809e-06	1.59587e-06	1.58984e-06	1.64367e-06	1.59757e-06	1.64261e-06	1.62461e-06	1.64712e-06	1.67379e-06	2.21638e-06	2.35583e-06	1.44103e-06	1.49666e-06	1.51833e-06	1.46203e-06	1.45716e-06	2.13128e-06
64.4531	1.62691e-06	1.61975e-06	1.67646e-06	1.62378e-06	1.67001e-06	1.64979e-06	1.6792e-06	1.69638e-06	2.98437e-06	3.14579e-06	1.46975e-06	1.53205e-06	1.54086e-06	1.48568e-06	1.48968e-06	2.94283e-06		3.5501e-06	3.09961e-06	3.16286e-06	3.13994e-06	3.13041e-06	3.25922e-06	3.14187e-06	3.12857e-06	2.22581e-06	3.00689e-06	3.09595e-06	3.08656e-06	2.9956e-06	3.06905e-06	3.01416e-06	4.7026e-06	1.54917e-06	1.5382e-06	1.58894e-06	1.54598e-06	1.58891e-06	1.5711e-06	1.59739e-06	1.61332e-06	2.19792e-06	2.34187e-06	1.39565e-06	1.45185e-06	1.46983e-06	1.41659e-06	1.41324e-06	2.10885e-06
64.9414	1.56499e-06	1.55821e-06	1.61185e-06	1.56014e-06	1.60954e-06	1.58699e-06	1.61495e-06	1.64238e-06	2.97463e-06	3.09388e-06	1.41885e-06	1.4741e-06	1.48186e-06	1.42641e-06	1.42871e-06	2.83201e-06		3.48009e-06	3.03164e-06	3.09728e-06	3.07431e-06	3.06569e-06	3.19029e-06	3.08099e-06	3.07081e-06	2.16211e-06	2.93512e-06	3.03071e-06	3.01629e-06	2.92544e-06	3.00268e-06	2.94979e-06	4.65865e-06	1.49164e-06	1.48124e-06	1.52878e-06	1.4865e-06	1.52936e-06	1.50942e-06	1.53721e-06	1.55667e-06	2.21496e-06	2.30433e-06	1.3469e-06	1.39532e-06	1.41136e-06	1.35688e-06	1.35373e-06	2.06216e-06
65.4297	1.51721e-06	1.51014e-06	1.56384e-06	1.5115e-06	1.56442e-06	1.54259e-06	1.5676e-06	1.59845e-06	2.96555e-06	2.9907e-06	1.37999e-06	1.42979e-06	1.4349e-06	1.38179e-06	1.38426e-06	2.74505e-06		3.38477e-06	2.95088e-06	3.01387e-06	2.99335e-06	2.98029e-06	3.09428e-06	3.0052e-06	2.98779e-06	2.1095e-06	2.86941e-06	2.96001e-06	2.94579e-06	2.85001e-06	2.9359e-06	2.88439e-06	4.60501e-06	1.45201e-06	1.44265e-06	1.48671e-06	1.44499e-06	1.49154e-06	1.47212e-06	1.49784e-06	1.52009e-06	2.2417e-06	2.26872e-06	1.31331e-06	1.35823e-06	1.37088e-06	1.3166e-06	1.31665e-06	2.02578e-06
65.918	1.46902e-06	1.46264e-06	1.50908e-06	1.46204e-06	1.51452e-06	1.49554e-06	1.519e-06	1.5411e-06	2.89395e-06	2.89542e-06	1.33817e-06	1.38333e-06	1.39249e-06	1.33685e-06	1.34264e-06	2.59582e-06		3.29251e-06	2.87432e-06	2.93711e-06	2.92059e-06	2.90493e-06	3.01298e-06	2.92767e-06	2.91055e-06	2.04942e-06	2.79958e-06	2.89255e-06	2.87416e-06	2.78108e-06	2.86312e-06	2.81171e-06	4.46924e-06	1.41582e-06	1.4041e-06	1.44305e-06	1.40548e-06	1.4536e-06	1.43428e-06	1.46036e-06	1.47864e-06	2.19657e-06	2.19469e-06	1.28042e-06	1.32205e-06	1.33867e-06	1.27958e-06	1.28372e-06	1.95311e-06
66.4062	1.42513e-06	1.42062e-06	1.46469e-06	1.41677e-06	1.4736e-06	1.45181e-06	1.4698e-06	1.48623e-06	2.83511e-06	2.78224e-06	1.30359e-06	1.34247e-06	1.35285e-06	1.29801e-06	1.30512e-06	2.49246e-06		3.16952e-06	2.76917e-06	2.82316e-06	2.81763e-06	2.79496e-06	2.90182e-06	2.82229e-06	2.79937e-06	1.98099e-06	2.7033e-06	2.79384e-06	2.77401e-06	2.67455e-06	2.76268e-06	2.71304e-06	4.3225e-06	1.37946e-06	1.36833e-06	1.40402e-06	1.36623e-06	1.41797e-06	1.39722e-06	1.41734e-06	1.4355e-06	2.13859e-06	2.09925e-06	1.25027e-06	1.28609e-06	1.30358e-06	1.2453e-06	1.24927e-06	1.87653e-06
66.8945	1.38568e-06	1.38195e-06	1.42734e-06	1.38017e-06	1.43016e-06	1.41252e-06	1.43097e-06	1.44367e-06	2.71492e-06	2.70789e-06	1.26676e-06	1.30637e-06	1.31238e-06	1.25646e-06	1.26617e-06	2.40941e-06		3.07131e-06	2.69076e-06	2.73314e-06	2.73598e-06	2.70799e-06	2.8162e-06	2.7353e-06	2.71357e-06	1.92462e-06	2.62851e-06	2.71196e-06	2.68874e-06	2.5945e-06	2.68201e-06	2.63382e-06	4.16792e-06	1.34572e-06	1.33587e-06	1.37071e-06	1.33453e-06	1.38336e-06	1.36617e-06	1.3855e-06	1.40479e-06	2.09727e-06	2.06197e-06	1.21658e-06	1.25525e-06	1.26732e-06	1.20785e-06	1.21666e-06	1.87436e-06
67.3828	1.34346e-06	1.33996e-06	1.38215e-06	1.33765e-06	1.38373e-06	1.36781e-06	1.38904e-06	1.40277e-06	2.67657e-06	2.67096e-06	1.22625e-06	1.26589e-06	1.27162e-06	1.2174e-06	1.22264e-06	2.42193e-06		2.9968e-06	2.62427e-06	2.66294e-06	2.66492e-06	2.64332e-06	2.7446e-06	2.66357e-06	2.641e-06	1.87074e-06	2.55803e-06	2.64854e-06	2.6154e-06	2.52623e-06	2.61999e-06	2.56765e-06	4.10815e-06	1.30362e-06	1.29341e-06	1.32825e-06	1.29229e-06	1.33707e-06	1.32347e-06	1.34316e-06	1.36384e-06	2.03261e-06	2.003e-06	1.18039e-06	1.21989e-06	1.23011e-06	1.17249e-06	1.17834e-06	1.85631e-06
67.8711	1.31045e-06	1.30449e-06	1.352e-06	1.30133e-06	1.34952e-06	1.33195e-06	1.35449e-06	1.36868e-06	2.64335e-06	2.60497e-06	1.19425e-06	1.23694e-06	1.23836e-06	1.18751e-06	1.18978e-06	2.46898e-06		2.92485e-06	2.55956e-06	2.60134e-06	2.59934e-06	2.58428e-06	2.6806e-06	2.59991e-06	2.57221e-06	1.84013e-06	2.49815e-06	2.58954e-06	2.55618e-06	2.47021e-06	2.5588e-06	2.51042e-06	4.01183e-06	1.27e-06	1.25604e-06	1.29573e-06	1.25542e-06	1.29998e-06	1.28542e-06	1.30722e-06	1.33003e-06	2.00832e-06	1.93814e-06	1.1494e-06	1.19216e-06	1.19774e-06	1.14243e-06	1.14606e-06	1.8626e-06
68.3594	1.27751e-06	1.27189e-06	1.32011e-06	1.27091e-06	1.31557e-06	1.2982e-06	1.32209e-06	1.33743e-06	2.62028e-06	2.60414e-06	1.16516e-06	1.20953e-06	1.20865e-06	1.16166e-06	1.16053e-06	2.49796e-06		2.86938e-06	2.49661e-06	2.54061e-06	2.53502e-06	2.52386e-06	2.61647e-06	2.53017e-06	2.50786e-06	1.80349e-06	2.43572e-06	2.51977e-06	2.49728e-06	2.40865e-06	2.4892e-06	2.44276e-06	3.93491e-06	1.22692e-06	1.21613e-06	1.25681e-06	1.21742e-06	1.25834e-06	1.24416e-06	1.26543e-06	1.28801e-06	1.97571e-06	1.89371e-06	1.11057e-06	1.15553e-06	1.15966e-06	1.10869e-06	1.10867e-06	1.83705e-06
68.8477	1.24553e-06	1.24249e-06	1.28868e-06	1.24379e-06	1.28711e-06	1.26747e-06	1.28964e-06	1.30239e-06	2.55616e-06	2.543e-06	1.13469e-06	1.18201e-06	1.17998e-06	1.13258e-06	1.13243e-06	2.45206e-06		2.8373e-06	2.46731e-06	2.51561e-06	2.50417e-06	2.4978e-06	2.58776e-06	2.50731e-06	2.4783e-06	1.78632e-06	2.40506e-06	2.48253e-06	2.47171e-06	2.38582e-06	2.45519e-06	2.41261e-06	3.84151e-06	1.18759e-06	1.18124e-06	1.2213e-06	1.18462e-06	1.22316e-06	1.20699e-06	1.22622e-06	1.24377e-06	1.90438e-06	1.87214e-06	1.07712e-06	1.12191e-06	1.12745e-06	1.07882e-06	1.07668e-06	1.80326e-06
69.3359	1.22504e-06	1.22201e-06	1.26805e-06	1.22283e-06	1.26705e-06	1.24568e-06	1.26495e-06	1.27547e-06	2.50696e-06	2.48564e-06	1.11427e-06	1.16266e-06	1.16341e-06	1.1111e-06	1.11531e-06	2.43129e-06		2.75009e-06	2.39003e-06	2.44035e-06	2.42747e-06	2.41789e-06	2.51248e-06	2.43381e-06	2.40566e-06	1.75012e-06	2.34053e-06	2.40934e-06	2.41017e-06	2.32049e-06	2.38123e-06	2.34388e-06	3.7564e-06	1.16517e-06	1.16013e-06	1.19849e-06	1.16366e-06	1.20197e-06	1.1835e-06	1.20169e-06	1.21496e-06	1.85971e-06	1.85061e-06	1.05532e-06	1.10144e-06	1.10901e-06	1.05432e-06	1.05565e-06	1.78233e-06
69.8242	1.19267e-06	1.19269e-06	1.23739e-06	1.19515e-06	1.23811e-06	1.21686e-06	1.23284e-06	1.24086e-06	2.40984e-06	2.40992e-06	1.0827e-06	1.13467e-06	1.1324e-06	1.07755e-06	1.08743e-06	2.36466e-06		2.68802e-06	2.32281e-06	2.3702e-06	2.35628e-06	2.33695e-06	2.43389e-06	2.3639e-06	2.33884e-06	1.71425e-06	2.28376e-06	2.34539e-06	2.34602e-06	2.25367e-06	2.31698e-06	2.27649e-06	3.64846e-06	1.13868e-06	1.13529e-06	1.17198e-06	1.13914e-06	1.17403e-06	1.15929e-06	1.1748e-06	1.18501e-06	1.78746e-06	1.81606e-06	1.02908e-06	1.07666e-06	1.08347e-06	1.02568e-06	1.03112e-06	1.72493e-06
70.3125	1.16768e-06	1.17045e-06	1.21214e-06	1.17284e-06	1.21523e-06	1.19613e-06	1.20916e-06	1.21529e-06	2.33773e-06	2.37752e-06	1.06122e-06	1.10933e-06	1.11039e-06	1.0531e-06	1.06626e-06	2.29993e-06		2.62803e-06	2.27336e-06	2.31862e-06	2.30508e-06	2.28285e-06	2.38681e-06	2.31383e-06	2.28651e-06	1.69049e-06	2.23342e-06	2.29278e-06	2.29618e-06	2.20465e-06	2.26733e-06	2.2258e-06	3.56785e-06	1.12009e-06	1.11719e-06	1.15258e-06	1.1208e-06	1.15692e-06	1.14208e-06	1.15778e-06	1.16892e-06	1.72065e-06	1.77792e-06	1.01214e-06	1.05638e-06	1.06708e-06	1.00571e-06	1.01477e-06	1.67863e-06
70.8008	1.14443e-06	1.1473e-06	1.18698e-06	1.14798e-06	1.1899e-06	1.17329e-06	1.18582e-06	1.19096e-06	2.29614e-06	2.33804e-06	1.03597e-06	1.0842e-06	1.08745e-06	1.02724e-06	1.04192e-06	2.26419e-06		2.53619e-06	2.20387e-06	2.24748e-06	2.2356e-06	2.21465e-06	2.32225e-06	2.24083e-06	2.21527e-06	1.65106e-06	2.169e-06	2.23484e-06	2.22649e-06	2.13737e-06	2.20923e-06	2.16048e-06	3.49297e-06	1.09736e-06	1.09356e-06	1.12774e-06	1.09532e-06	1.13251e-06	1.11801e-06	1.13715e-06	1.14684e-06	1.63331e-06	1.76199e-06	9.8512e-07	1.0303e-06	1.04281e-06	9.7653e-07	9.8818e-07	1.60191e-06
71.2891	1.12322e-06	1.12604e-06	1.16359e-06	1.12768e-06	1.16975e-06	1.15132e-06	1.16694e-06	1.16899e-06	2.25549e-06	2.26177e-06	1.01469e-06	1.06155e-06	1.06794e-06	1.00636e-06	1.01856e-06	2.18991e-06		2.49949e-06	2.17114e-06	2.21616e-06	2.20161e-06	2.18057e-06	2.28932e-06	2.2067e-06	2.18589e-06	1.61205e-06	2.13779e-06	2.20247e-06	2.19253e-06	2.10893e-06	2.17758e-06	2.1265e-06	3.42859e-06	1.07994e-06	1.07608e-06	1.10717e-06	1.07748e-06	1.11588e-06	1.10181e-06	1.12114e-06	1.1286e-06	1.64634e-06	1.69789e-06	9.6419e-07	1.00858e-06	1.02273e-06	9.5833e-07	9.6855e-07	1.54435e-06
71.7773	1.10374e-06	1.10474e-06	1.14227e-06	1.10708e-06	1.14653e-06	1.12851e-06	1.14768e-06	1.15032e-06	2.15738e-06	2.20552e-06	9.9881e-07	1.04244e-06	1.04952e-06	9.9124e-07	1.00145e-06	2.11587e-06		2.44577e-06	2.1305e-06	2.17259e-06	2.16142e-06	2.13986e-06	2.24683e-06	2.16262e-06	2.14735e-06	1.58459e-06	2.10247e-06	2.16934e-06	2.15184e-06	2.06933e-06	2.14559e-06	2.0954e-06	3.37639e-06	1.05946e-06	1.05563e-06	1.08569e-06	1.05642e-06	1.09595e-06	1.08061e-06	1.10008e-06	1.10868e-06	1.57659e-06	1.67329e-06	9.4551e-07	9.8707e-07	1.00207e-06	9.4202e-07	9.4863e-07	1.50919e-06
72.2656	1.08913e-06	1.08912e-06	1.12551e-06	1.09114e-06	1.12894e-06	1.1114e-06	1.13047e-06	1.13298e-06	2.14497e-06	2.19929e-06	9.7872e-07	1.0241e-06	1.03306e-06	9.7253e-07	9.8242e-07	2.11317e-06		2.38393e-06	2.0717e-06	2.10817e-06	2.09752e-06	2.07886e-06	2.17993e-06	2.10057e-06	2.09249e-06	1.53378e-06	2.04676e-06	2.11502e-06	2.08646e-06	2.00784e-06	2.09195e-06	2.043e-06	3.36387e-06	1.03991e-06	1.03444e-06	1.06345e-06	1.03576e-06	1.07399e-06	1.05808e-06	1.07799e-06	1.08606e-06	1.53887e-06	1.67547e-06	9.2374e-07	9.6556e-07	9.8157e-07	9.2198e-07	9.2928e-07	1.50874e-06
72.7539	1.05977e-06	1.06045e-06	1.1008e-06	1.0637e-06	1.10216e-06	1.08366e-06	1.10051e-06	1.10102e-06	2.14567e-06	2.2082e-06	9.4891e-07	9.9696e-07	1.00241e-06	9.4088e-07	9.5094e-07	2.14449e-06		2.341e-06	2.02864e-06	2.0621e-06	2.05325e-06	2.03451e-06	2.12828e-06	2.05765e-06	2.04971e-06	1.50168e-06	2.00321e-06	2.06858e-06	2.04261e-06	1.96741e-06	2.04661e-06	2.00164e-06	3.31678e-06	1.01645e-06	1.00998e-06	1.04216e-06	1.01253e-06	1.0513e-06	1.03614e-06	1.05121e-06	1.05877e-06	1.54037e-06	1.65887e-06	9.0091e-07	9.4441e-07	9.5612e-07	8.9756e-07	9.0335e-07	1.51682e-06
73.2422	1.03686e-06	1.03676e-06	1.07581e-06	1.04049e-06	1.07806e-06	1.06017e-06	1.07484e-06	1.07769e-06	2.09413e-06	2.16576e-06	9.2175e-07	9.7703e-07	9.7661e-07	9.1616e-07	9.2688e-07	2.11637e-06		2.26421e-06	1.95649e-06	1.98568e-06	1.97954e-06	1.96266e-06	2.05334e-06	1.97984e-06	1.97387e-06	1.45606e-06	1.92316e-06	1.98481e-06	1.96784e-06	1.89392e-06	1.96556e-06	1.92082e-06	3.27216e-06	9.907e-07	9.8451e-07	1.0154e-06	9.8807e-07	1.02618e-06	1.01045e-06	1.02472e-06	1.03104e-06	1.48008e-06	1.6259e-06	8.767e-07	9.2267e-07	9.3224e-07	8.7245e-07	8.788e-07	1.49268e-06
73.7305	1.01816e-06	1.02047e-06	1.05936e-06	1.02316e-06	1.06157e-06	1.04328e-06	1.05662e-06	1.05801e-06	2.08984e-06	2.14869e-06	9.0032e-07	9.5696e-07	9.5441e-07	8.9547e-07	9.0543e-07	2.09515e-06		2.19658e-06	1.89385e-06	1.92283e-06	1.9115e-06	1.90071e-06	1.98951e-06	1.91475e-06	1.90531e-06	1.39947e-06	1.84625e-06	1.91315e-06	1.89629e-06	1.82762e-06	1.89809e-06	1.85272e-06	3.19516e-06	9.665e-07	9.6083e-07	9.925e-07	9.6455e-07	1.00129e-06	9.8601e-07	9.998e-07	1.00701e-06	1.45683e-06	1.6158e-06	8.5377e-07	8.9962e-07	9.0775e-07	8.4958e-07	8.5653e-07	1.4914e-06
74.2188	1.00224e-06	1.00211e-06	1.04203e-06	1.00487e-06	1.04322e-06	1.02664e-06	1.03612e-06	1.04208e-06	2.06461e-06	2.06927e-06	8.8124e-07	9.4106e-07	9.3552e-07	8.767e-07	8.8539e-07	2.0423e-06		2.13377e-06	1.83875e-06	1.8679e-06	1.85888e-06	1.84403e-06	1.9349e-06	1.85912e-06	1.8433e-06	1.36499e-06	1.79278e-06	1.86172e-06	1.83665e-06	1.77325e-06	1.84297e-06	1.79727e-06	3.09718e-06	9.5008e-07	9.4507e-07	9.7601e-07	9.484e-07	9.8352e-07	9.7063e-07	9.8174e-07	9.8921e-07	1.46399e-06	1.56103e-06	8.3848e-07	8.8542e-07	8.908e-07	8.3378e-07	8.3897e-07	1.46274e-06
74.707	9.8789e-07	9.9008e-07	1.02756e-06	9.9143e-07	1.02852e-06	1.01331e-06	1.02335e-06	1.02662e-06	2.02168e-06	1.97036e-06	8.704e-07	9.2694e-07	9.2153e-07	8.6805e-07	8.7529e-07	1.94112e-06		2.08658e-06	1.79854e-06	1.82853e-06	1.81986e-06	1.80745e-06	1.89538e-06	1.8199e-06	1.80285e-06	1.33206e-06	1.75209e-06	1.81668e-06	1.78877e-06	1.7328e-06	1.79871e-06	1.75361e-06	3.01154e-06	9.3626e-07	9.3552e-07	9.647e-07	9.3788e-07	9.7047e-07	9.5886e-07	9.7102e-07	9.7481e-07	1.433e-06	1.45221e-06	8.2865e-07	8.7317e-07	8.7915e-07	8.2603e-07	8.2954e-07	1.38712e-06
75.1953	9.5729e-07	9.6159e-07	9.9866e-07	9.6249e-07	9.9897e-07	9.8537e-07	9.943e-07	1.00063e-06	2.02281e-06	1.91016e-06	8.5126e-07	9.0084e-07	8.9842e-07	8.4588e-07	8.5476e-07	1.88223e-06		2.02563e-06	1.74493e-06	1.77295e-06	1.76368e-06	1.75006e-06	1.83822e-06	1.76595e-06	1.74956e-06	1.28916e-06	1.69954e-06	1.759e-06	1.73178e-06	1.67777e-06	1.74253e-06	1.70162e-06	2.92009e-06	9.0844e-07	9.104e-07	9.4125e-07	9.1273e-07	9.4437e-07	9.3463e-07	9.4452e-07	9.5011e-07	1.4509e-06	1.39202e-06	8.0841e-07	8.4881e-07	8.5407e-07	8.0318e-07	8.0859e-07	1.3664e-06
75.6836	9.3009e-07	9.3511e-07	9.7073e-07	9.3675e-07	9.7358e-07	9.5851e-07	9.6707e-07	9.7177e-07	2.00728e-06	1.89115e-06	8.3401e-07	8.7932e-07	8.7788e-07	8.2657e-07	8.3611e-07	1.84998e-06		1.98015e-06	1.70199e-06	1.72819e-06	1.72073e-06	1.70398e-06	1.79106e-06	1.72185e-06	1.70869e-06	1.25936e-06	1.66296e-06	1.71813e-06	1.68988e-06	1.63524e-06	1.69609e-06	1.66147e-06	2.834e-06	8.8503e-07	8.8902e-07	9.1869e-07	8.9208e-07	9.231e-07	9.1135e-07	9.2008e-07	9.2687e-07	1.44774e-06	1.37144e-06	7.9059e-07	8.286e-07	8.3423e-07	7.8332e-07	7.9011e-07	1.33851e-06
76.1719	8.9955e-07	9.0734e-07	9.4061e-07	9.0949e-07	9.4382e-07	9.2927e-07	9.3982e-07	9.475e-07	1.94699e-06	1.83056e-06	8.1258e-07	8.5482e-07	8.5668e-07	8.0534e-07	8.1435e-07	1.81754e-06		1.91788e-06	1.65644e-06	1.6834e-06	1.67785e-06	1.66148e-06	1.74348e-06	1.67304e-06	1.66076e-06	1.21642e-06	1.61545e-06	1.66643e-06	1.64059e-06	1.58508e-06	1.64139e-06	1.61051e-06	2.75687e-06	8.5994e-07	8.6485e-07	8.9347e-07	8.6861e-07	8.977e-07	8.872e-07	8.9745e-07	9.073e-07	1.41996e-06	1.32313e-06	7.708e-07	8.0779e-07	8.159e-07	7.6442e-07	7.7082e-07	1.31284e-06
76.6602	8.7467e-07	8.808e-07	9.1367e-07	8.832e-07	9.1541e-07	9.0038e-07	9.1288e-07	9.1967e-07	1.92254e-06	1.78839e-06	7.9071e-07	8.3319e-07	8.3455e-07	7.824e-07	7.9136e-07	1.79225e-06		1.86055e-06	1.60748e-06	1.63528e-06	1.62949e-06	1.60867e-06	1.68532e-06	1.62311e-06	1.60754e-06	1.17701e-06	1.56884e-06	1.61976e-06	1.59638e-06	1.53873e-06	1.5898e-06	1.56464e-06	2.70898e-06	8.3661e-07	8.3949e-07	8.6907e-07	8.438e-07	8.7294e-07	8.6131e-07	8.7185e-07	8.8207e-07	1.40185e-06	1.31488e-06	7.5091e-07	7.874e-07	7.9572e-07	7.4267e-07	7.495e-07	1.29389e-06
77.1484	8.4516e-07	8.5225e-07	8.849e-07	8.5434e-07	8.8657e-07	8.7034e-07	8.8304e-07	8.9085e-07	1.87508e-06	1.76744e-06	7.63e-07	8.0647e-07	8.073e-07	7.5611e-07	7.6347e-07	1.74676e-06		1.80774e-06	1.56112e-06	1.58841e-06	1.5812e-06	1.56459e-06	1.63817e-06	1.57607e-06	1.55867e-06	1.13487e-06	1.52136e-06	1.5746e-06	1.54675e-06	1.48842e-06	1.54365e-06	1.51694e-06	2.6333e-06	8.0879e-07	8.1194e-07	8.3933e-07	8.1584e-07	8.451e-07	8.3259e-07	8.4369e-07	8.5187e-07	1.36039e-06	1.30453e-06	7.2529e-07	7.6287e-07	7.7025e-07	7.1703e-07	7.2353e-07	1.27036e-06
77.6367	8.2135e-07	8.269e-07	8.5812e-07	8.2833e-07	8.5866e-07	8.4354e-07	8.5727e-07	8.6504e-07	1.79192e-06	1.69146e-06	7.3899e-07	7.8436e-07	7.8406e-07	7.3231e-07	7.4103e-07	1.69027e-06		1.75296e-06	1.51175e-06	1.53374e-06	1.52573e-06	1.51198e-06	1.58073e-06	1.52233e-06	1.50765e-06	1.09196e-06	1.46868e-06	1.52224e-06	1.49294e-06	1.43745e-06	1.49287e-06	1.46514e-06	2.54508e-06	7.8598e-07	7.8826e-07	8.1421e-07	7.9116e-07	8.2193e-07	8.0914e-07	8.204e-07	8.3044e-07	1.28742e-06	1.28054e-06	7.0239e-07	7.4272e-07	7.497e-07	6.9621e-07	7.0175e-07	1.23531e-06
78.125	7.9085e-07	7.9476e-07	8.2475e-07	7.96e-07	8.2641e-07	8.1072e-07	8.2341e-07	8.327e-07	1.76057e-06	1.65388e-06	7.0828e-07	7.5362e-07	7.519e-07	7.0238e-07	7.1255e-07	1.6181e-06		1.68966e-06	1.44737e-06	1.46919e-06	1.4604e-06	1.44782e-06	1.51476e-06	1.46104e-06	1.44286e-06	1.04789e-06	1.41272e-06	1.45859e-06	1.43289e-06	1.37785e-06	1.43314e-06	1.40755e-06	2.45109e-06	7.5601e-07	7.5715e-07	7.8149e-07	7.5972e-07	7.9029e-07	7.7716e-07	7.8716e-07	7.9807e-07	1.24195e-06	1.24968e-06	6.7391e-07	7.1407e-07	7.2016e-07	6.6985e-07	6.7525e-07	1.18115e-06
78.6133	7.6539e-07	7.6987e-07	7.9899e-07	7.7039e-07	8.0376e-07	7.8623e-07	7.9415e-07	8.0208e-07	1.69567e-06	1.63021e-06	6.8187e-07	7.2567e-07	7.2618e-07	6.7614e-07	6.8709e-07	1.6293e-06		1.62899e-06	1.39e-06	1.40873e-06	1.40239e-06	1.38947e-06	1.46264e-06	1.40259e-06	1.38536e-06	1.0168e-06	1.358e-06	1.40047e-06	1.37788e-06	1.32186e-06	1.38307e-06	1.3535e-06	2.34354e-06	7.2954e-07	7.3236e-07	7.5565e-07	7.339e-07	7.6577e-07	7.5284e-07	7.5791e-07	7.6718e-07	1.17115e-06	1.20251e-06	6.4531e-07	6.8552e-07	6.9273e-07	6.4262e-07	6.4888e-07	1.12944e-06
79.1016	7.4211e-07	7.4791e-07	7.7565e-07	7.478e-07	7.813e-07	7.6426e-07	7.7166e-07	7.7833e-07	1.64276e-06	1.57611e-06	6.5704e-07	6.9936e-07	7.0188e-07	6.5377e-07	6.6362e-07	1.59919e-06		1.58362e-06	1.35352e-06	1.3753e-06	1.36803e-06	1.35575e-06	1.42297e-06	1.36864e-06	1.34582e-06	9.872e-07	1.31929e-06	1.36362e-06	1.34039e-06	1.28533e-06	1.34482e-06	1.31446e-06	2.26181e-06	7.1114e-07	7.1423e-07	7.3599e-07	7.1522e-07	7.4762e-07	7.3415e-07	7.4003e-07	7.4815e-07	1.12337e-06	1.15785e-06	6.2546e-07	6.6431e-07	6.7352e-07	6.2481e-07	6.2985e-07	1.07803e-06
79.5898	7.204e-07	7.2613e-07	7.5244e-07	7.2596e-07	7.5792e-07	7.4363e-07	7.5007e-07	7.5984e-07	1.59749e-06	1.54387e-06	6.3584e-07	6.7431e-07	6.7872e-07	6.3458e-07	6.4172e-07	1.57913e-06		1.54009e-06	1.30849e-06	1.33442e-06	1.3272e-06	1.31322e-06	1.37919e-06	1.32914e-06	1.30376e-06	9.6314e-07	1.28413e-06	1.32219e-06	1.30513e-06	1.2503e-06	1.30748e-06	1.27673e-06	2.17334e-06	6.9371e-07	6.9662e-07	7.1775e-07	6.9755e-07	7.2768e-07	7.1673e-07	7.2188e-07	7.3312e-07	1.12062e-06	1.14921e-06	6.0926e-07	6.4525e-07	6.5464e-07	6.0912e-07	6.1346e-07	1.05655e-06
80.0781	7.0636e-07	7.1393e-07	7.4079e-07	7.1254e-07	7.4508e-07	7.319e-07	7.3694e-07	7.4469e-07	1.53464e-06	1.51809e-06	6.2157e-07	6.5797e-07	6.6298e-07	6.193e-07	6.2439e-07	1.57003e-06		1.49073e-06	1.2697e-06	1.29635e-06	1.29042e-06	1.2753e-06	1.34084e-06	1.29242e-06	1.26516e-06	9.3111e-07	1.24363e-06	1.28129e-06	1.26893e-06	1.21165e-06	1.26798e-06	1.2337e-06	2.109e-06	6.7859e-07	6.8216e-07	7.0297e-07	6.8202e-07	7.1192e-07	7.0156e-07	7.0763e-07	7.2144e-07	1.09499e-06	1.12087e-06	5.942e-07	6.2859e-07	6.3834e-07	5.9376e-07	5.979e-07	1.04797e-06
80.5664	6.8482e-07	6.9226e-07	7.2072e-07	6.9209e-07	7.2316e-07	7.1293e-07	7.1843e-07	7.2394e-07	1.48647e-06	1.45793e-06	6.0528e-07	6.3858e-07	6.4162e-07	6.0087e-07	6.0693e-07	1.53314e-06		1.45351e-06	1.22811e-06	1.25398e-06	1.24859e-06	1.23399e-06	1.29799e-06	1.25127e-06	1.22795e-06	8.9986e-07	1.2049e-06	1.24325e-06	1.23281e-06	1.17546e-06	1.22706e-06	1.19173e-06	2.05311e-06	6.6106e-07	6.6452e-07	6.8675e-07	6.6496e-07	6.9417e-07	6.8588e-07	6.9302e-07	7.0508e-07	1.06833e-06	1.1046e-06	5.7869e-07	6.1211e-07	6.2062e-07	5.786e-07	5.825e-07	1.01862e-06
81.0547	6.6514e-07	6.7098e-07	6.9831e-07	6.7187e-07	7.0348e-07	6.9184e-07	6.9758e-07	7.0715e-07	1.44203e-06	1.42008e-06	5.8649e-07	6.2154e-07	6.2357e-07	5.8362e-07	5.9065e-07	1.46923e-06		1.40041e-06	1.18528e-06	1.20846e-06	1.2039e-06	1.18793e-06	1.2527e-06	1.20324e-06	1.18717e-06	8.7004e-07	1.16411e-06	1.20308e-06	1.19121e-06	1.13403e-06	1.18774e-06	1.15208e-06	2.03569e-06	6.3766e-07	6.4033e-07	6.6272e-07	6.4155e-07	6.7066e-07	6.6163e-07	6.6828e-07	6.8118e-07	1.05182e-06	1.0756e-06	5.5738e-07	5.9073e-07	5.9788e-07	5.5885e-07	5.6397e-07	9.8382e-07
81.543	6.4638e-07	6.5091e-07	6.7718e-07	6.5284e-07	6.842e-07	6.7042e-07	6.7717e-07	6.8863e-07	1.3765e-06	1.39428e-06	5.6866e-07	6.0587e-07	6.0737e-07	5.6688e-07	5.7343e-07	1.40433e-06		1.34666e-06	1.13604e-06	1.15866e-06	1.15626e-06	1.14013e-06	1.20218e-06	1.15253e-06	1.14125e-06	8.3449e-07	1.11931e-06	1.15906e-06	1.1458e-06	1.08874e-06	1.14235e-06	1.1082e-06	1.99775e-06	6.187e-07	6.217e-07	6.435e-07	6.2405e-07	6.52e-07	6.4209e-07	6.493e-07	6.5991e-07	1.0234e-06	1.05138e-06	5.392e-07	5.7361e-07	5.7932e-07	5.3889e-07	5.4453e-07	9.7183e-07
82.0312	6.2217e-07	6.268e-07	6.5239e-07	6.2965e-07	6.5953e-07	6.4593e-07	6.529e-07	6.6342e-07	1.35543e-06	1.36527e-06	5.453e-07	5.8499e-07	5.8558e-07	5.4561e-07	5.5203e-07	1.392e-06		1.30352e-06	1.09983e-06	1.12144e-06	1.11713e-06	1.10098e-06	1.16169e-06	1.11336e-06	1.10771e-06	8.0807e-07	1.08146e-06	1.12231e-06	1.10637e-06	1.0519e-06	1.10647e-06	1.07314e-06	1.94934e-06	5.9754e-07	6.0089e-07	6.2242e-07	6.042e-07	6.3062e-07	6.2126e-07	6.2918e-07	6.3911e-07	1.00422e-06	1.02847e-06	5.1843e-07	5.5454e-07	5.5938e-07	5.1987e-07	5.2388e-07	9.6094e-07
82.5195	6.0481e-07	6.1083e-07	6.3368e-07	6.1492e-07	6.4168e-07	6.2766e-07	6.3521e-07	6.4837e-07	1.34631e-06	1.32425e-06	5.2744e-07	5.7059e-07	5.6951e-07	5.2921e-07	5.3605e-07	1.34882e-06		1.26473e-06	1.06881e-06	1.0886e-06	1.08588e-06	1.06731e-06	1.12706e-06	1.0772e-06	1.07244e-06	7.8195e-07	1.05465e-06	1.09235e-06	1.07097e-06	1.02223e-06	1.07618e-06	1.04574e-06	1.91277e-06	5.7686e-07	5.8098e-07	6.009e-07	5.8559e-07	6.1025e-07	6.0105e-07	6.0759e-07	6.2139e-07	9.9436e-07	9.9273e-07	5.0027e-07	5.3667e-07	5.4159e-07	5.0196e-07	5.0657e-07	9.472e-07
83.0078	5.8799e-07	5.9539e-07	6.1874e-07	5.9862e-07	6.239e-07	6.1052e-07	6.1832e-07	6.3282e-07	1.3378e-06	1.27538e-06	5.1338e-07	5.565e-07	5.5403e-07	5.1424e-07	5.2037e-07	1.31041e-06		1.21804e-06	1.02651e-06	1.04384e-06	1.04252e-06	1.02347e-06	1.07947e-06	1.03654e-06	1.03043e-06	7.5343e-07	1.01631e-06	1.04973e-06	1.03079e-06	9.8397e-07	1.03597e-06	1.00775e-06	1.85955e-06	5.6341e-07	5.6842e-07	5.8819e-07	5.7225e-07	5.9544e-07	5.8682e-07	5.9382e-07	6.0735e-07	9.7623e-07	9.6557e-07	4.8907e-07	5.2611e-07	5.2991e-07	4.8985e-07	4.9379e-07	9.2249e-07
83.4961	5.6932e-07	5.7935e-07	6.0403e-07	5.8171e-07	6.0631e-07	5.9589e-07	6.0278e-07	6.1635e-07	1.3339e-06	1.2443e-06	4.9657e-07	5.4008e-07	5.3742e-07	4.9476e-07	5.026e-07	1.29637e-06		1.1884e-06	9.9797e-07	1.01237e-06	1.01286e-06	9.9291e-07	1.04834e-06	1.00462e-06	9.9666e-07	7.2844e-07	9.8278e-07	1.01629e-06	9.949e-07	9.5051e-07	1.00304e-06	9.7577e-07	1.83684e-06	5.4646e-07	5.5378e-07	5.757e-07	5.5638e-07	5.8028e-07	5.7268e-07	5.7812e-07	5.924e-07	9.3885e-07	9.4729e-07	4.7556e-07	5.1245e-07	5.1594e-07	4.7392e-07	4.791e-07	8.9282e-07
83.9844	5.5187e-07	5.6213e-07	5.8831e-07	5.6374e-07	5.8986e-07	5.7961e-07	5.8627e-07	5.9965e-07	1.30597e-06	1.2195e-06	4.8244e-07	5.2427e-07	5.2235e-07	4.783e-07	4.8924e-07	1.24219e-06		1.14808e-06	9.6263e-07	9.7759e-07	9.7709e-07	9.5799e-07	1.01381e-06	9.7002e-07	9.5827e-07	7.0026e-07	9.4736e-07	9.7953e-07	9.613e-07	9.1664e-07	9.6546e-07	9.3815e-07	1.77006e-06	5.2869e-07	5.3604e-07	5.5807e-07	5.3767e-07	5.634e-07	5.5528e-07	5.6086e-07	5.7885e-07	9.1635e-07	9.2294e-07	4.6045e-07	4.9657e-07	5.0109e-07	4.5575e-07	4.6518e-07	8.5822e-07
84.4727	5.3651e-07	5.4699e-07	5.7483e-07	5.4769e-07	5.7461e-07	5.654e-07	5.7098e-07	5.8297e-07	1.26864e-06	1.21125e-06	4.7126e-07	5.1076e-07	5.0948e-07	4.6718e-07	4.786e-07	1.22435e-06		1.10478e-06	9.3198e-07	9.4689e-07	9.4565e-07	9.2774e-07	9.8271e-07	9.4119e-07	9.2744e-07	6.7262e-07	9.1394e-07	9.4775e-07	9.2851e-07	8.835e-07	9.3344e-07	9.0536e-07	1.70611e-06	5.1537e-07	5.2447e-07	5.4756e-07	5.2491e-07	5.5121e-07	5.4393e-07	5.4843e-07	5.6417e-07	8.7863e-07	9.0606e-07	4.5119e-07	4.856e-07	4.9041e-07	4.4734e-07	4.5708e-07	8.3568e-07
84.9609	5.2723e-07	5.3813e-07	5.6465e-07	5.3864e-07	5.6538e-07	5.5647e-07	5.6195e-07	5.736e-07	1.22979e-06	1.19184e-06	4.6293e-07	5.019e-07	5.0193e-07	4.6002e-07	4.7099e-07	1.20371e-06		1.07678e-06	9.0966e-07	9.2487e-07	9.2017e-07	9.0539e-07	9.6137e-07	9.1652e-07	9.0489e-07	6.5143e-07	8.9032e-07	9.256e-07	9.0709e-07	8.6232e-07	9.1222e-07	8.8229e-07	1.62476e-06	5.0521e-07	5.1604e-07	5.391e-07	5.1637e-07	5.4233e-07	5.3448e-07	5.3921e-07	5.5326e-07	8.4441e-07	8.9535e-07	4.4168e-07	4.7542e-07	4.8116e-07	4.3887e-07	4.4791e-07	8.1099e-07
85.4492	5.1355e-07	5.2522e-07	5.5072e-07	5.2718e-07	5.5136e-07	5.4386e-07	5.4785e-07	5.6164e-07	1.17488e-06	1.18264e-06	4.5195e-07	4.8978e-07	4.9098e-07	4.4953e-07	4.6128e-07	1.19719e-06		1.03812e-06	8.7935e-07	8.9427e-07	8.8762e-07	8.7557e-07	9.3144e-07	8.8686e-07	8.747e-07	6.261e-07	8.6077e-07	8.9627e-07	8.7618e-07	8.3321e-07	8.8356e-07	8.5624e-07	1.5721e-06	4.917e-07	5.0308e-07	5.2524e-07	5.0429e-07	5.2744e-07	5.22e-07	5.2476e-07	5.3907e-07	8.2365e-07	8.8428e-07	4.292e-07	4.6246e-07	4.6866e-07	4.2669e-07	4.363e-07	8.1294e-07
85.9375	5.0322e-07	5.1333e-07	5.3654e-07	5.1557e-07	5.3744e-07	5.3033e-07	5.3443e-07	5.5048e-07	1.15745e-06	1.1531e-06	4.4232e-07	4.8098e-07	4.8055e-07	4.4208e-07	4.5324e-07	1.15962e-06		1.00299e-06	8.5542e-07	8.6976e-07	8.6496e-07	8.5298e-07	9.0497e-07	8.6125e-07	8.4915e-07	6.0325e-07	8.3649e-07	8.7192e-07	8.4871e-07	8.0858e-07	8.6009e-07	8.3492e-07	1.51995e-06	4.8025e-07	4.9102e-07	5.1171e-07	4.9268e-07	5.135e-07	5.0834e-07	5.1107e-07	5.2338e-07	8.1301e-07	8.6327e-07	4.1935e-07	4.5245e-07	4.5683e-07	4.1772e-07	4.2693e-07	7.9533e-07
86.4258	4.8885e-07	5.0049e-07	5.2183e-07	5.0257e-07	5.238e-07	5.152e-07	5.1919e-07	5.3035e-07	1.10754e-06	1.12858e-06	4.2916e-07	4.6698e-07	4.6508e-07	4.2688e-07	4.3812e-07	1.11257e-06		9.7653e-07	8.2791e-07	8.4185e-07	8.3751e-07	8.2734e-07	8.7391e-07	8.3499e-07	8.2381e-07	5.8489e-07	8.119e-07	8.4723e-07	8.2008e-07	7.8434e-07	8.3548e-07	8.1181e-07	1.45706e-06	4.682e-07	4.7925e-07	4.9872e-07	4.8139e-07	5.0172e-07	4.9518e-07	4.981e-07	5.0789e-07	7.8823e-07	8.5218e-07	4.0803e-07	4.4041e-07	4.4353e-07	4.046e-07	4.1439e-07	7.7463e-07
86.9141	4.751e-07	4.8645e-07	5.0774e-07	4.8856e-07	5.1051e-07	5.0051e-07	5.0219e-07	5.1222e-07	1.06993e-06	1.11425e-06	4.1696e-07	4.5203e-07	4.5093e-07	4.1475e-07	4.251e-07	1.07378e-06		9.4987e-07	8.0324e-07	8.1925e-07	8.1386e-07	8.0502e-07	8.477e-07	8.1173e-07	7.9881e-07	5.6496e-07	7.8468e-07	8.1821e-07	7.9217e-07	7.5939e-07	8.0627e-07	7.8751e-07	1.41959e-06	4.5438e-07	4.642e-07	4.8322e-07	4.6667e-07	4.8728e-07	4.8075e-07	4.8175e-07	4.9161e-07	7.6899e-07	8.4125e-07	3.9492e-07	4.258e-07	4.2878e-07	3.9337e-07	4.0108e-07	7.5305e-07
87.4023	4.5819e-07	4.6666e-07	4.8754e-07	4.683e-07	4.9114e-07	4.8134e-07	4.8352e-07	4.899e-07	1.043e-06	1.08283e-06	4.0253e-07	4.3426e-07	4.3287e-07	4.0079e-07	4.0998e-07	1.02034e-06		9.2026e-07	7.7741e-07	7.9334e-07	7.8906e-07	7.7975e-07	8.2126e-07	7.8563e-07	7.7491e-07	5.4363e-07	7.6026e-07	7.9002e-07	7.6729e-07	7.3653e-07	7.7862e-07	7.6086e-07	1.36167e-06	4.3988e-07	4.4655e-07	4.6476e-07	4.4854e-07	4.7046e-07	4.6321e-07	4.6505e-07	4.7203e-07	7.383e-07	8.0973e-07	3.8218e-07	4.1123e-07	4.132e-07	3.8112e-07	3.8773e-07	7.0973e-07
87.8906	4.4269e-07	4.5064e-07	4.7129e-07	4.5145e-07	4.7603e-07	4.6429e-07	4.6662e-07	4.7011e-07	1.00154e-06	1.05027e-06	3.8773e-07	4.1782e-07	4.1728e-07	3.8446e-07	3.935e-07	9.7414e-07		8.8064e-07	7.4496e-07	7.6055e-07	7.5759e-07	7.4698e-07	7.87e-07	7.5243e-07	7.4271e-07	5.2615e-07	7.3013e-07	7.5767e-07	7.3502e-07	7.0436e-07	7.4544e-07	7.2671e-07	1.31526e-06	4.2494e-07	4.3111e-07	4.4894e-07	4.3258e-07	4.5528e-07	4.4696e-07	4.485e-07	4.5329e-07	7.093e-07	7.8128e-07	3.681e-07	3.9636e-07	3.9885e-07	3.6678e-07	3.7365e-07	6.815e-07
88.3789	4.2654e-07	4.337e-07	4.5403e-07	4.3493e-07	4.592e-07	4.4702e-07	4.494e-07	4.5442e-07	9.7546e-07	9.8919e-07	3.7246e-07	4.0198e-07	4.0187e-07	3.7033e-07	3.7909e-07	9.4284e-07		8.4511e-07	7.1347e-07	7.3103e-07	7.2841e-07	7.1753e-07	7.5773e-07	7.2313e-07	7.1238e-07	5.0532e-07	7.0308e-07	7.2824e-07	7.0599e-07	6.7531e-07	7.1634e-07	6.972e-07	1.2841e-06	4.1097e-07	4.1631e-07	4.336e-07	4.1778e-07	4.4016e-07	4.3104e-07	4.3217e-07	4.382e-07	6.8364e-07	7.3227e-07	3.5461e-07	3.8307e-07	3.8565e-07	3.5408e-07	3.6085e-07	6.5718e-07
88.8672	4.1342e-07	4.1821e-07	4.3727e-07	4.1943e-07	4.4348e-07	4.318e-07	4.3517e-07	4.3985e-07	9.3574e-07	9.37e-07	3.5767e-07	3.8861e-07	3.8788e-07	3.5713e-07	3.6446e-07	9.039e-07		8.1859e-07	6.898e-07	7.0518e-07	7.0175e-07	6.9154e-07	7.3356e-07	6.9891e-07	6.8994e-07	4.8669e-07	6.7923e-07	7.0396e-07	6.8419e-07	6.5175e-07	6.9527e-07	6.7459e-07	1.26681e-06	3.9841e-07	4.0138e-07	4.1794e-07	4.0285e-07	4.2464e-07	4.1615e-07	4.1891e-07	4.2334e-07	6.5399e-07	6.751e-07	3.4153e-07	3.7106e-07	3.7236e-07	3.4124e-07	3.4807e-07	6.1841e-07
89.3555	3.9709e-07	4.0336e-07	4.2046e-07	4.0452e-07	4.2797e-07	4.1539e-07	4.1922e-07	4.236e-07	9.1143e-07	8.8919e-07	3.4146e-07	3.7367e-07	3.7133e-07	3.4013e-07	3.4785e-07	8.656e-07		7.854e-07	6.6102e-07	6.773e-07	6.7443e-07	6.6331e-07	7.039e-07	6.6927e-07	6.6203e-07	4.7086e-07	6.5349e-07	6.8241e-07	6.5876e-07	6.2632e-07	6.7292e-07	6.5044e-07	1.22664e-06	3.8253e-07	3.8737e-07	4.0237e-07	3.888e-07	4.0977e-07	4.0084e-07	4.0318e-07	4.0672e-07	6.439e-07	6.4385e-07	3.2622e-07	3.5643e-07	3.5677e-07	3.2493e-07	3.321e-07	6.0452e-07
89.8438	3.8133e-07	3.8632e-07	4.0342e-07	3.8795e-07	4.0984e-07	3.9829e-07	4.0208e-07	4.0667e-07	8.4928e-07	8.6686e-07	3.274e-07	3.5993e-07	3.5617e-07	3.2644e-07	3.3341e-07	8.304e-07		7.6287e-07	6.3718e-07	6.5226e-07	6.4864e-07	6.3804e-07	6.7938e-07	6.4555e-07	6.3887e-07	4.5171e-07	6.3047e-07	6.6057e-07	6.3572e-07	6.0322e-07	6.5379e-07	6.2979e-07	1.18829e-06	3.6858e-07	3.7286e-07	3.8718e-07	3.7444e-07	3.9358e-07	3.8561e-07	3.8916e-07	3.9224e-07	6.212e-07	6.223e-07	3.1462e-07	3.4423e-07	3.44e-07	3.1319e-07	3.1913e-07	5.7662e-07
90.332	3.6806e-07	3.7388e-07	3.9056e-07	3.7548e-07	3.959e-07	3.8483e-07	3.8878e-07	3.9233e-07	8.2123e-07	8.4164e-07	3.1565e-07	3.4728e-07	3.4409e-07	3.151e-07	3.2087e-07	8.064e-07		7.3225e-07	6.1393e-07	6.288e-07	6.2417e-07	6.1529e-07	6.5628e-07	6.224e-07	6.1318e-07	4.3454e-07	6.0825e-07	6.375e-07	6.1558e-07	5.8126e-07	6.3221e-07	6.0966e-07	1.16014e-06	3.5481e-07	3.5972e-07	3.7375e-07	3.6149e-07	3.7941e-07	3.7135e-07	3.753e-07	3.7855e-07	5.9454e-07	6.0671e-07	3.03e-07	3.3121e-07	3.3081e-07	3.0201e-07	3.0729e-07	5.5899e-07

## Sheet: Figure 4Eii
Vehicle
Time (sec)	Theta
-9	0.386557	-0.70923	0.408085	-0.68994	0.374694	-0.68229	0.426933	-0.67972	0.442681	-0.65477	0.405614	-0.6628	0.436698	-0.64223	0.398781	-0.67671	0.37221	-0.74326	0.504432	-0.70572	0.426551	-0.71156	0.398974	-0.70902	0.411154	-0.68831	0.397206	-0.69655	0.421515	-0.69151	0.325698	-0.79356
-7	-0.37151	-0.58286	-0.38734	-0.57595	-0.40103	-0.57539	-0.38505	-0.56289	-0.36003	-0.59165	-0.39195	-0.57705	-0.37949	-0.5703	-0.37411	-0.58761	-0.56142	-0.61097	-0.61817	-0.58155	-0.34775	-0.6009	-0.35398	-0.58607	-0.34885	-0.59825	-0.35712	-0.59707	-0.3276	-0.60598	-0.57171	-1.08618
-5	-0.64977	-0.1213	-0.64486	-0.1199	-0.6698	-0.1115	-0.65048	-0.1025	-0.6673	-0.09992	-0.66078	-0.10892	-0.66794	-0.10764	-0.63724	-0.11268	-1.37211	-0.2279	-1.2052	-0.11617	-0.65597	-0.1311	-0.64408	-0.10446	-0.63125	-0.11324	-0.65739	-0.13521	-0.66315	-0.1258	-1.3082	-0.87705
-3	-0.618	0.619257	-0.58999	0.613835	-0.61758	0.622887	-0.58956	0.614919	-0.62433	0.601517	-0.60654	0.604174	-0.63187	0.565955	-0.62924	0.592789	-0.75119	0.533841	-0.61098	0.593364	-0.67663	0.60932	-0.62751	0.599665	-0.62068	0.58689	-0.64207	0.589454	-0.64882	0.573374	-0.74447	0.372947
-1	0.607588	2.00753	0.604252	2.0004	0.575675	2.01151	0.615675	2.00895	0.589521	2.00714	0.558967	2.00364	0.584004	2.00433	0.585031	1.99609	-0.28643	2.17732	-0.31055	2.01418	0.603653	2.0167	0.649717	2.0031	0.617376	2.0175	0.621758	2.01502	0.620493	2.00132	-0.36284	0.963224
1	1.4072	0.746295	1.42941	0.756654	1.40391	0.745722	1.44919	0.734114	1.42536	0.715001	1.39935	0.724662	1.43217	0.754509	1.40135	0.738154	1.74879	0.781049	2.08573	0.770057	1.46655	0.778494	1.47304	0.765176	1.46625	0.762261	1.49107	0.786375	1.42765	0.790248	1.81249	2.08121
3	-0.49174	-0.48896	-0.45827	-0.48075	-0.41984	-0.5178	-0.45842	-0.52176	-0.41776	-0.51648	-0.45332	-0.5164	-0.45217	-0.50547	-0.47995	-0.5106	1.33448	-0.46141	0.765842	-0.4708	-0.46566	-0.47986	-0.49062	-0.47544	-0.48732	-0.49186	-0.46156	-0.47161	-0.46644	-0.48146	1.33238	0.302881
5	-0.5743	-0.65365	-0.5891	-0.66045	-0.56304	-0.64784	-0.59016	-0.64106	-0.56181	-0.65184	-0.57639	-0.65259	-0.56076	-0.66138	-0.56536	-0.64544	0.170808	-0.5716	0.276139	-0.62206	-0.52024	-0.60446	-0.57419	-0.6425	-0.56948	-0.64027	-0.55165	-0.60011	-0.5637	-0.62272	0.268272	-0.34769
7	-0.3813	-0.60256	-0.39657	-0.61709	-0.36731	-0.60594	-0.39139	-0.60481	-0.40293	-0.59561	-0.39151	-0.60291	-0.38714	-0.60898	-0.3674	-0.59955	-0.06158	-0.57309	-0.26816	-0.63662	-0.35289	-0.62892	-0.36733	-0.62319	-0.37108	-0.61411	-0.38819	-0.6397	-0.36936	-0.62641	-0.10442	-0.36429
9	0.685282	-0.21452	0.624381	-0.2268	0.68432	-0.23936	0.573254	-0.24524	0.576586	-0.21339	0.71655	-0.21181	0.626493	-0.22879	0.668132	-0.19444	-0.59356	-0.30398	-0.61908	-0.24466	0.522384	-0.24771	0.535976	-0.22727	0.533874	-0.22062	0.54795	-0.25059	0.569417	-0.21107	-0.6472	-0.25149
mGluR PAM
Time (sec)	Theta
-9	-0.06772	-0.4056	-0.084	-0.30329	-0.11361	-0.33748	-0.07759	-0.34178	-0.05376	-0.31208	-0.111	-0.51716	-0.0982	-0.34837	-0.08289	-0.39636	0.085922	-0.51329	0.1592	-0.44564	-0.09362	-0.46672	0.000766	-0.37339	-0.03082	-0.40737	-0.10915	-0.49042	-0.06742	-0.46385	-0.01858	-0.04873
-7	-0.16701	0.512976	-0.19642	0.46124	-0.21773	0.505742	-0.18898	0.489273	-0.18061	0.557107	-0.14831	0.495764	-0.19201	0.515223	-0.21304	0.510963	-0.69559	0.41264	-0.31356	0.571757	-0.22313	0.527293	-0.11549	0.523469	-0.16903	0.492281	-0.25965	0.569449	-0.22344	0.510431	-0.61815	-0.82643
-5	-1.30228	0.292759	-1.33956	0.249081	-1.34626	0.301063	-1.33907	0.295693	-1.34515	0.351501	-1.29908	0.337056	-1.31912	0.352803	-1.33459	0.350709	-0.5353	0.143726	-0.64513	0.358553	-1.32159	0.374945	-1.28619	0.346432	-1.32829	0.387859	-1.33534	0.399156	-1.32598	0.423228	-0.60106	-0.68656
-3	-0.62588	-0.21838	-0.66012	-0.12355	-0.69046	-0.1927	-0.65646	-0.17405	-0.67742	-0.16685	-0.62753	0.20237	-0.64246	-0.18415	-0.66652	-0.2011	-0.40069	-0.45831	-0.76118	-0.2525	-0.60585	-0.24476	-0.59961	-0.22998	-0.63933	-0.21082	-0.60808	-0.21271	-0.60909	-0.21465	-0.61447	-0.67879
-1	0.757158	-1.18642	0.789213	-1.1939	0.828664	-1.24231	0.757025	-1.32373	0.762983	-1.35075	0.839424	-1.24896	0.763483	-1.24481	0.733956	-1.24079	-0.58478	-0.80228	-0.80454	-1.17371	0.71751	-1.1643	0.63252	-1.21389	0.711289	-1.25899	0.740716	-1.1945	0.672766	-1.2203	-0.7393	-0.11401
1	1.33551	-0.40482	1.31337	-0.45106	1.30003	-0.43073	1.32459	-0.44468	1.31349	-0.46209	1.32431	-0.51333	1.33163	-0.42788	1.3246	-0.4006	0.983928	-0.23596	0.200386	-0.40471	1.42053	-0.3974	1.32713	-0.42081	1.33885	-0.42932	1.41584	-0.41176	1.40642	-0.40903	0.277438	0.544293
3	0.640541	0.36228	0.618096	0.315996	0.557889	0.356076	0.654519	0.379108	0.619898	0.364808	0.599007	0.022833	0.62842	0.366334	0.631733	0.363497	1.74701	0.356137	1.60691	0.373888	0.767668	0.412723	0.7563	0.356988	0.675307	0.40143	0.763056	0.369845	0.757557	0.37083	1.54123	0.173803
5	-0.46585	0.507426	-0.46558	0.472063	-0.46168	0.477058	-0.45001	0.454092	-0.46905	0.4381	-0.53108	0.560039	-0.44374	0.435996	-0.40785	0.448796	-0.30954	0.436326	-0.50258	0.453188	-0.38588	0.435931	-0.42817	0.423488	-0.44796	0.457818	-0.37445	0.45683	-0.38155	0.430606	-0.49957	0.109344
7	-0.4191	0.706024	-0.32906	0.722511	-0.27694	0.707958	-0.36172	0.71354	-0.33383	0.69117	-0.38323	0.871609	-0.36566	0.727564	-0.38323	0.73611	-0.69416	0.809233	-0.20367	0.73681	-0.49935	0.725963	-0.61021	0.730994	-0.47567	0.755527	-0.49126	0.732433	-0.52571	0.749649	-0.07095	0.953697
9	0.314637	-0.16625	0.354048	-0.1491	0.420095	-0.14468	0.337691	-0.04747	0.363446	-0.11093	0.337489	-0.21022	0.337667	-0.1927	0.397824	-0.17122	0.403199	-0.14822	1.26418	-0.21764	0.223712	-0.20367	0.322954	-0.1433	0.365656	-0.18841	0.258308	-0.21832	0.296436	-0.17691	1.3434	0.573386
