# Supplementary material for: Dissociation of impulsive traits by subthalamic metabotropic glutamate receptor 4
Source: eLife. 2022 Jan 4;11:e62123. doi: 10.7554/eLife.62123 (PMC8803315; doi:10.7554/eLife.62123)
Supplement: Figure 6—figure supplement 1—source data 1. [file elife-62123-fig6-figsupp1-data1.xlsx]

## Sheet: Fig6 fig suppl 1Aii
Figure 6 - figure supplement 1Ai: Precue response rate
HI	LI
99	100
98.5294	99.1379
100	100
Figure 6 - figure supplement 1Aii: % of NG trials with FA
HI	LI
56.7701	18.6973
44.2791	12.5
47.8352	18.8538
Figure 6 - figure supplement 1Aiii: % of correct Go trials
HI	LI
0.051576	0.016163
0.057444	0.010559
0.070335	0.014858

## Sheet: Fig6 fig suppl 1B
Figure 6 - figure supplement 1Bi:
	HI						LI
Perinuclear	1.85643	1.70246	2.27778	2.53106	2.22099	2.56703	1.44728	1.67069	1.59847	1.86074	1.21867	2.16814
Outside	0.841402	0.830986	1.19444	1.06212	0.950715	1.22637	0.724999	0.740891	0.842449	0.809044	0.516625	0.957227
Figure 6 - figure supplement 1Bii:
	HI						LI
VGlut2+	2.45673	3.63877	3.17767	3.49239	2.37849	3.03042	2.19817	2.70182	1.93789	2.53141	2.24502	1.52759
VGlut2-	1.08493	1.60662	1.70033	1.86047	1.16719	1.63934	1.14409	1.80397	1.19093	1.55085	1.38008	0.995924

## Sheet: Fig6 fig suppl 1C
	Control	mirE-mGluR4
Repeat 1	0.687489	0.265246
	0.731794	0.400237
	0.803174	0.394297
Repeat 2	0.498032	0.0830667
	0.362514	0.477763
	0.565265	0.429769
