# Supplementary material for: Dissociation of impulsive traits by subthalamic metabotropic glutamate receptor 4
Source: eLife. 2022 Jan 4;11:e62123. doi: 10.7554/eLife.62123 (PMC8803315; doi:10.7554/eLife.62123)
Supplement: Figure 6—figure supplement 3—source data 1. [file elife-62123-fig6-figsupp3-data1.xlsx]

## Sheet: Fig 6 fig suppl 3Bi
	Group
Session:	Control										mirE-mGlu4
Prior	0.0537723	0.0459585	0.047092	0.0615465	0.0466807	0.0482269	0.0410068	0.0328002	0.0378043	0.0541512	0.0590562	0.0362602	0.0579584	0.0347903	0.0321945	0.0461637	0.0424545	0.0435797
1	0.0704791	0.0613473	0.0930955	0.0720229	0.082275	0.0772317	0.06547	0.0782018	0.037676	0.045338	0.0680038	0.0490682	0.0717348	0.0301466	0.0636469	0.060752	0.0598523	0.0325569
2	0.0443429	0.0742258	0.0574213	0.062733	0.0593747	0.070966	0.0346164	0.0411897	0.0336035	0.0259404	0.0627997	0.0237806	0.0539817	0.0184888	0.0303675	0.016979	0.0204199	0.0292312
3	0.0344811	0.0543717	0.0421234	0.0400486	0.0578544	0.058842	0.0351408	0.0542355	0.04734	0.0216205	0.0268376	0.0476391	0.043777	0.0282758	0.023677	0.00903836	0.00593283	0.016191
4	0.0529265	0.0469665	0.050641	0.090764	0.055395	0.0944645	0.0437532	0.0762695	0.031835	0.0302393	0.0666481	0.0304385	0.0663918	0.02021	0.0291833	0.0231324	0.0205349	0.0258609
5	0.0765904	0.052538	0.056284	0.067427	0.0435767	0.054161	0.0243497	0.0571991	0.0420441	0.0230531	0.0511619	0.031874	0.0411432	0.0135744	0.0187875	0.0240616	0.02072	0.0239312

## Sheet: Fig 6 fig suppl 3Ci
	Group
Session:	Control						mirE-mGluR4
Prior	0.0199431	0.0267404	0.0172095	0.0295062	0.0244714	0.00966363	0.029753	0.0128599	0.0104604	0.0241494	0.0174883	0.0303493	0.0316254	0.022843
1	0.0240355	0.036082	0.0224883	0.0380813	0.0479071	0.0517612	0.0626629	0.0330981	0.0319502	0.03174	0.0892731	0.0378439	0.0433259	0.0203504
2	0.0503124	0.0209723	0.0157271	0.0116261	0.0235431	0.0149102	0.0437522	0.00651187	0.004811	0.0123593	0.0467698	0.0185408	0.0442345	0.0233716
3	0.0204318	0.0232217	0.0325587	0.017415	0.0189351	0.0117415	0.0462053	0.00174264	0.010446	0.0121204	0.0398257	0.0143084	0.0315571	0.0199586
4	0.0372452	0.0283944	0.0202668	0.0232043	0.0173111	0.00978821	0.0538308	0.0179954	0.00250882	0.0159621	0.0504176	0.0321118	0.0581787	0.0303617
5	0.0509863	0.0224451	0.0194352	0.0413233	0.0207844	0.0117384	0.0412964	0.0118976	0.00819865	0.019714	0.0796894	0.0263181	0.0155939	0.0202047

## Sheet: Fig 6 fig suppl 3Bii
Figure 6 - figure supplement 3 Bii: FA Latency to poke
Latency (s)	Control: baseline	Control: treatment	mirE: baseline	mirE: treatment
0	2.5641	6.15385	0	2.73973
1	17.9487	22.3077	16.9014	19.1781
2	28.2051	35.3846	30.9859	45.2055
3	39.3162	46.1538	45.0704	53.4247
4	49.5726	52.3077	53.5211	57.5342
5	58.1197	59.2308	59.1549	63.0137
6	69.2308	68.4615	64.7887	71.2329
7	78.6325	75.3846	80.2817	76.7123
8	82.906	83.0769	88.7324	84.9315
9	92.3077	94.6154	94.3662	95.8904
10	100	100	100	100
Figure 6 - figure supplement 3 Bii: Go Latency to poke
Latency (s)	Control: baseline	Control: treatment	mirE: baseline	mirE: treatment
0	0.77821	0.429185	0.97561	0.469484
1	25.2918	24.4635	30.2439	25.8216
2	73.5409	73.3906	78.0488	79.3427
3	91.4397	93.5622	92.6829	92.9577
4	98.0545	96.9957	97.0732	96.2441
5	99.2218	98.7124	99.5122	97.1831
6	99.6109	99.5708	99.5122	99.061
7	99.6109	99.5708	100	99.061
8	99.6109	100	100	99.5305
9	100	100	100	100
10	100	100	100	100

## Sheet: Fig 6 fig suppl 3Cii
Figure 6 - figure supplement 3 Cii: FA Latency to poke
Latency (s)	Control: baseline	Control: treatment	mirE: baseline	mirE: treatment
0	0	0	3.50877	3.57143
1	9.09091	8.82353	10.5263	12.5
2	18.1818	20.5882	17.5439	21.4286
3	21.2121	26.4706	31.5789	28.5714
4	39.3939	44.1176	45.614	42.8571
5	48.4848	52.9412	50.8772	55.3571
6	69.697	58.8235	57.8947	60.7143
7	72.7273	67.6471	64.9123	66.0714
8	84.8485	79.4118	73.6842	80.3571
9	96.9697	88.2353	91.2281	92.8571
10	100	100	100	100
Figure 6 - figure supplement 3 Cii: Go Latency to poke
Latency (s)	Control: baseline	Control: treatment	mirE: baseline	mirE: treatment
0	0	0	1.88679	1.37615
1	15.2941	8.44156	12.7358	13.3028
2	68.2353	66.2338	66.0377	67.8899
3	90	94.1558	86.7925	89.4495
4	97.6471	99.3506	91.5094	95.4128
5	98.2353	99.3506	96.6981	98.1651
6	100	100	97.6415	99.5413
7	100	100	99.5283	99.5413
8	100	100	99.5283	100
9	100	100	99.5283	100
10	100	100	100	100
