# Supplementary material for: Dissociation of impulsive traits by subthalamic metabotropic glutamate receptor 4
Source: eLife. 2022 Jan 4;11:e62123. doi: 10.7554/eLife.62123 (PMC8803315; doi:10.7554/eLife.62123)
Supplement: Figure 6—figure supplement 4—source data 1. [file elife-62123-fig6-figsupp4-data1.xlsx]

## Sheet: Fig 6 fig suppl 4A-C
Figure 6 - figure supplement 4A; Mean distance traveled (m)
	No laser																			Laser
Control	7.447	8.25183	5.05533	7.62333	8.06067	8.2195	7.14767		10.2187	9.14467	8.211	9.081								7.90375	8.799	5.406	9.11525	8.5995	7.69225	7.1115		10.416	9.1995	6.714	5.946
AAV::ChR2	6.764	4.28267		7.231	7.799	7.051	7.45767	4.114	4.60233											3.3375	4.1485		4.351	5.103	2.895	5.1805	2.2215	6.863
AAV::ChR2 3 mW	6.97867	5.35067	7.98733	5.52333	3.57	5.11967	6.07167	2.71367												2.49	4.2125	8.0425	1.621	2.336	1.154	1.789	3.964
AAV::Arch	6.32067	8.607	5.79867	6.05467	7.21233	5.772	4.54167	4.73133		5.164	8.44333	8.45833	6.98167	6.641	7.828	7.518	4.625	1.24867	8.12567	7.778	6.6795	7.894	6.915	11.435	10.7745	9.596	9.6025		4.0995	7.0955	8.564	6.9635	4.456	4.3865	8.8565	2.569	2.7705	3.2275
Figure 6 - figure supplement 4CB; Total distance traveled (m)
	Vehicle										mGlu4 PAM
HI	64.621	103.25	95.802	92.202	85.244	88.372	90.842	82.66	138.271	113.597	97.697	93.386	159.049	142.202	120.283	92.097	101.492	122.447	74.419	90.134
LI	59.427	109.152	82.509	114.329	102.488	83.736	109.332	114.319	139.139	104.164	142.542	110.606	53.481	109	31	28.937	79.029	83.374	99.295	140.069
Figure 6 - figure supplement 4C; Total distance traveled (m)
	Control										mirE-mGlu4
HI	147.632	139.402	113.131	107.558	70.4134	108.128	96.8204	101.474	114.064	88.1421	94.1641	123.928	102.944	88.1906	67.4568	108.695	121.705	92.4942
LI	91.9302	65.1873	130.509	113.69	121.678	126.503					89.2342	87.8204	97.4961	95.4945	140.621	139.804	105.994	141.64

## Sheet: Fig 6 fig suppl 4D,E
Distance traveled	Precue response rate	% of NG trials with FA
112.015	0.0249458	21.9029
107.559	0.0218306	27.0115
131.4	0.00652166	3.51213
140.237	0.0535731	50.6389
131.773	0.0239772	24.7392
81.8267	0.0197625	21.6099
80.3619	0.0195565	20.9383
173.89	0.0369001	41.1799
130.48	0.0335843	42.1958
100.27	0.0410908	38.887
102.499	0.0179459	22.5062
85.1849	0.0305956	36.0947
116.88	0.03866	33.0559
176.076	0.0342238	33.3326
124.081	0.0271257	31.4778
104.867	0.0477752	29.0558
117.435	0.0319142	29.7598
98.7575	0.0271131	29.6496
98.0022	0.0507834	43.5238
63.4015	0.0194181	18.3532

## Sheet: Fig 6 fig suppl 4F-H
Precue response rate (pokes/sec)	% of NG trials with FA	% of Correct Go responses
0.0198524	32.1429	100
0.0305237	37.037	100
0.0470309	34.6154	100
0.0110709	22.2222	100
0.0364568	42.8571	96.4286
0.0147886	41.3793	100
0.0307289	14.8148	100
0.0164286	20.6897	88
0.0780872	23.8095	91.6667
0.063189	38.4615	100
0.00749817	42.8571	100
0.03119	25.9259	100
0.0669489	56.5217	100
0.0300364	46.6667	100
0.0786545	55.5556	100
0.00211579	10.3448	100
0.0178655	46.1538	100
0.0182762	13.3333	100
0.0307367	33.3333	100
0.0298616	46.4286	100
0.0281794	40	95.6522
0.0168095	30	100
0.07433	34.6154	100
0.0669154	54.1667	86.3636
0.0654027	56	100
0.0337791	57.8947	92
0.0353375	18.5185	100
0.0988274	58.3333	100
0.0600652	50	100
0.0471955	48.2759	100
0.0239107	16	100
0.0480452	36	100
0.0354813	22.2222	100
0.107337	42.8571	100
0.0374784	36	100
0.0342596	48.2759	100
0.0302598	12	100
0.0463208	15.3846	100
0.0601213	55.5556	100
0.0445514	31.25	100
0.0255974	27.5862	100
0.0172136	29.6296	100
0.0235156	29.6296	100
0.0391131	43.3333	96.2963
0.022402	29.1667	88.8889
0.0179861	18.5185	100
0.0355435	22.2222	85.1852
0.0143207	0	85.7143
0.0234664	26.6667	100
0.0203681	17.2414	96.5517
0.012857	22.2222	100
0.0409382	3.33333	100
0.020346	3.44828	96.6667
0.0149063	20.6897	100
0.0126056	6.89655	100
0.0115543	10.3448	96.5517
0.0195603	26.6667	100
0.0700783	55.5556	95.8333
0.0524968	57.1429	95.6522
0.027874	28	100
0.032923	24	100
0.0940398	50	100
0.0602484	28	100
0.105108	42.8571	100
0.0721293	51.7241	100
0.0431076	58.6207	96.2963
0.0725261	25	96.1538
0.0447362	31.0345	100
0.0385878	7.69231	100
0.0483779	7.14286	100
0.0596959	55	100
0.018243	28.5714	100
0.0352943	57.6923	95.4545
0.0230876	20	100
0.0124753	31.0345	100
0.0322061	16	92.5926
0.0328544	17.2414	100
0.00429996	17.2414	96.5517
0.00462807	10.7143	100
0.0104291	3.33333	96.5517
0.0185371	20	100
0.0216816	24.1379	100
0.0347518	31.0027	100
0.0487964	25.5523	100
0.0500817	46.6682	98.7654
0.0392577	32.4415	97.619
0.0211299	33.8291	100
0.0216744	21.6582	100
0.0278822	21.4665	100
0.0220339	11.1213	100
0.0222491	14.7126	98.7654
0.0188275	14.9817	98.8889
0.0585354	52.4848	98.5507
0.0527849	37.2469	100
0.045409	49.0524	100
0.0607026	49.3444	100
0.0502719	43.0674	100
0.0553898	44.4444	98.7179
0.0438596	43.0323	100
0.0373984	42.1882	100
0.0323733	32.7854	100
0.0562512	50.7385	98.7179
0.0218514	28.8114	100
0.0244179	26.5326	100
0.017815	14.1711	100
0.0364259	27.6828	98.6111
0.028759	34.4691	100
0.0101058	16.185	100
0.0640566	50.5843	95.8182
0.0373205	41.8889	98.5507
0.0665401	46.5432	100
0.0287632	32.3889	100
0.0285762	54.2735	100
0.0427842	32.1294	100
0.048811	29.5414	100
0.0489999	46.2363	100
0.0316884	19.5326	81.3492
0.0141742	24.7595	100
0.0105302	13.9805	100
0.0295495	22.3932	90.8642
0.0178613	25.6885	100
0.0328914	25.5421	100
0.0296875	46.6355	100
0.0274267	23.1938	100
0.0394139	44	100
0.0241819	25.9259	100
0.0141265	37.037	100
0.0214041	33.3333	100
0.0252044	25	100
0.0242853	37.037	96.2963
0.0816886	56	100
0.0335982	42.8571	100
0.0309157	30.7692	100
0.0353676	38.4615	89.2857
0.02206	35.7143	100
0.0328524	29.6296	100
0.0452038	53.8462	100
0.0378634	57.6923	100
0.0163269	37.931	100
0.00698574	17.2414	100
0.0251918	46.4286	100
0.0337329	27.5862	100
0.0327703	48.1481	100
0.0597238	58.3333	100
0.0181015	33.3333	93.1034
0.0278896	56	100
0.02577	22.2222	100
0.0553567	44.4444	91.6667
0.0172694	44	89.6552
0.016876	27.5862	100
