# Supplementary material for: Dissociation of impulsive traits by subthalamic metabotropic glutamate receptor 4
Source: eLife. 2022 Jan 4;11:e62123. doi: 10.7554/eLife.62123 (PMC8803315; doi:10.7554/eLife.62123)
Supplement: Figure 6—figure supplement 7—source data 1. [file elife-62123-fig6-figsupp7-data1.xlsx]

## Sheet: Fig 6 fig suppl 7A
	fMR		Electrophysiology	Optogenetics	mGlu4 PAM		mGlu4 ISH		mirE
	HI	LI			HI	LI	HI	LI	HI	LI
Mean	0.04177	0.02028	0.02672	0.0313	0.05105	0.01804	0.05979	0.01386	0.04564	0.02193
Minimum	0.02092	0.0167	0.02147	0.009257	0.03114	0.005305	0.05158	0.01056	0.03219	0.009664
25% Percentile	0.02897	0.01713	0.02271	0.01945	0.03819	0.01218	0.05158	0.01056	0.03742	0.01612
Median	0.04659	0.01882	0.02629	0.03069	0.04515	0.01791	0.05744	0.01486	0.04606	0.0235
75% Percentile	0.05216	0.02416	0.03088	0.03676	0.06149	0.02457	0.07034	0.01616	0.05387	0.02957
Maximum	0.05666	0.0249	0.0326	0.06453	0.09351	0.02978	0.07034	0.01616	0.06155	0.03163
Range	0.03574	0.008197	0.01113	0.05527	0.06236	0.02448	0.01876	0.005604	0.02935	0.02196
N	5	5	10	26	26	28	3	3	18	14

## Sheet: Fig 6 fig suppl 7B
Animal:	No Treatment	Vehicle	mGlu4 PAM
A1	0.112861	0.08554	0.115426
A2	0.070958	0.087274	0.096093
A3	0.0946	0.076128	0.127258
