# Supplementary material for: Dissociation of impulsive traits by subthalamic metabotropic glutamate receptor 4
Source: eLife. 2022 Jan 4;11:e62123. doi: 10.7554/eLife.62123 (PMC8803315; doi:10.7554/eLife.62123)
Supplement: Figure 6—source data 1. [file elife-62123-fig6-data1.xlsx]

## Sheet: Figure 6B
	Group
Area:	HI						LI
Cortex	123.557	113.799	117.645	101.076	85.4858	164.305	110.888	102.475	103.627	104.675	92.9336	85.4007
Amygdala	91.9022	82.3668	106.418	75.7059	145.081	154.582	79.4086	99.2852	106.62	100	90.6316	124.055
Thalamus	119.328	112.908	99.7016	106.147	114.83	120.624	103.934	93.1319	94.8984	85.9272	105.222	116.887
STN	113.857	147.848	104.142	127.104	144.622	155.386	92.8504	109.036	102.777	73.2668	97.8913	124.178
ZI	114.176	83.8898	82.4309	61.3381	97.5906	98.3105	88.9149	107.159	101.299	90.6269	88.3529	123.647

## Sheet: Figure 6E
Figure 6E i: Precue response rate
	HI Vehicle										HI mirE-mGlu4								LI Vehicle						LI mirE-mGlu4
No Treatment	0.0537723	0.0459585	0.047092	0.0615465	0.0466807	0.0482269	0.0410068	0.0328002	0.0378043	0.0541512	0.0590562	0.0362602	0.0579584	0.0347903	0.0321945	0.0461637	0.0424545	0.0435797	0.0199431	0.0267404	0.0172095	0.0295062	0.0244714	0.00966363	0.029753	0.0128599	0.0104604	0.0241494	0.0174883	0.0303493	0.0316254	0.022843
Treatment	0.054666	0.0512921	0.0496828	0.0660799	0.0522754	0.0691559	0.0344146	0.062568	0.0404064	0.0249709	0.0482159	0.0366506	0.0504373	0.0206867	0.0238826	0.0187441	0.0157292	0.0219943	0.0362211	0.024687	0.0240869	0.0322638	0.0190102	0.0110894	0.0471109	0.0105452	0.00705115	0.0159321	0.0566442	0.0242461	0.0351099	0.0235083
Figure 6E i: % NG trails with FA
	HI Vehicle										HI mirE-mGlu4								LI Vehicle						LI mirE-mGlu4
No Treatment	52.4848	37.2469	49.0524	49.3444	43.0674	44.4444	43.0323	42.1882	32.7854	50.7385	50.5843	41.8889	46.5432	32.3889	54.2735	32.1294	29.5414	46.2363	28.8114	26.5326	14.1711	27.6828	34.4691	16.185	19.5326	24.7595	13.9805	22.3932	25.6885	25.5421	46.6355	23.1938
Treatment	56.5476	56.2105	62.8122	51.6677	57.2706	64.3505	31.3492	40.122	51.7187	34.8488	59.2313	33.4188	50.3968	24.6914	38.0274	15.9435	9.87654	38.8278	30.8879	19.9097	32.2627	39.7487	9.2775	19.636	42.1897	16.0317	8.96552	20.7705	35.4762	13.7531	55.4286	23.1922
Figure 6E i: % correct Go trails
	HI Vehicle										HI mirE-mGlu4								LI Vehicle						LI mirE-mGlu4
No Treatment	98.5507	100	100	100	100	98.7179	100	100	100	98.7179	95.8182	98.5507	100	100	100	100	100	100	100	100	100	98.6111	100	100	81.3492	100	100	90.8642	100	100	100	100
Treatment	100	100	100	100	100	100	100	100	100	100	100	98.6667	100	100	100	100	100	100	100	100	100	100	100	100	96.1839	92.0988	98.8506	100	100	100	98.8889	97.619
