# Supplementary figures and images for: Dissociation of impulsive traits by subthalamic metabotropic glutamate receptor 4
Source: eLife journal article supplement (doi:10.7554/elife.62123), 2022-01-04

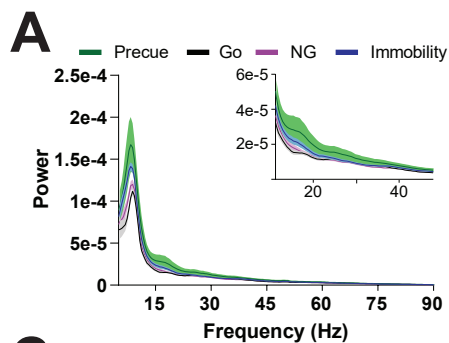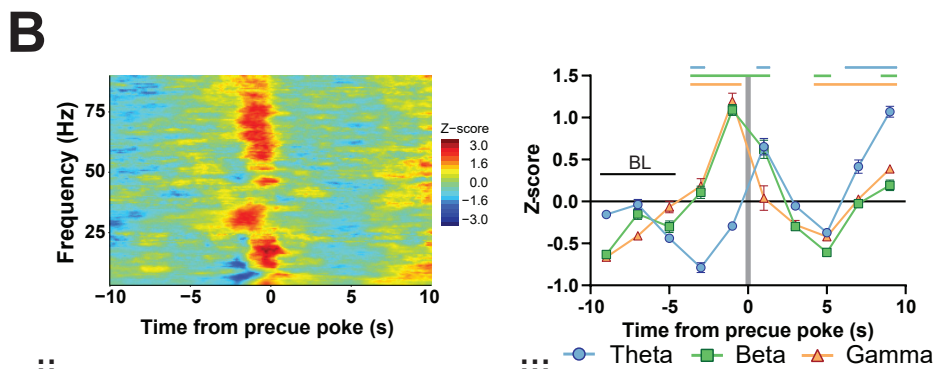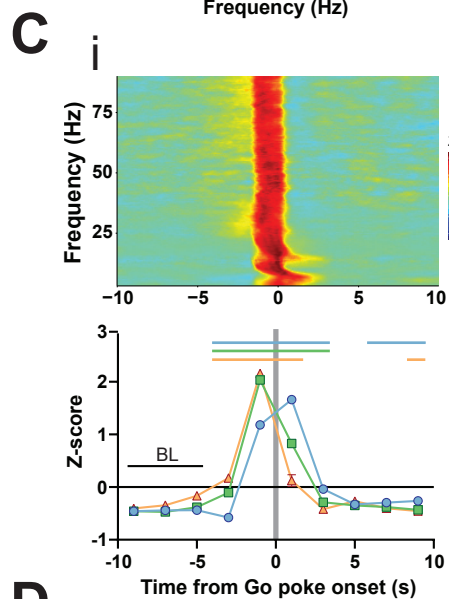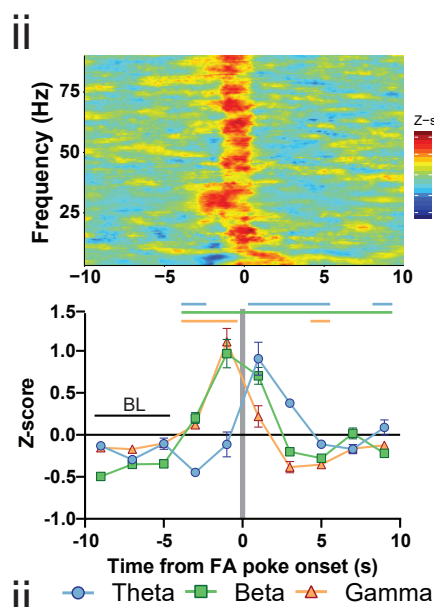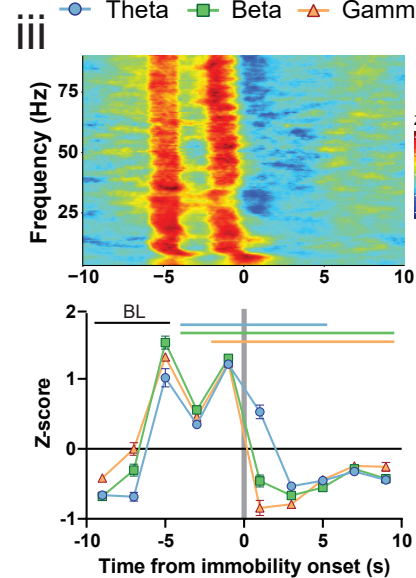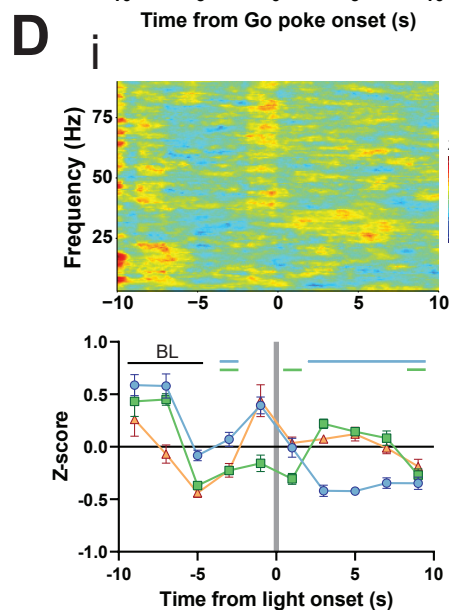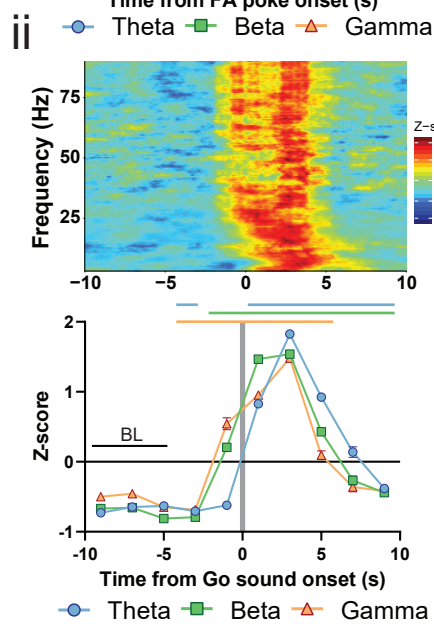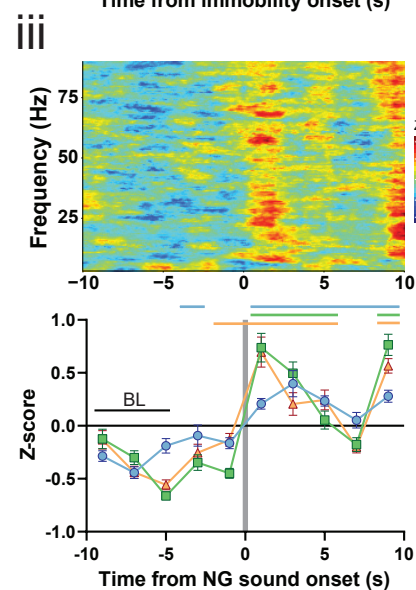

Supplement: supp [file elife-62123-supp-v1.zip]

# Pre-surgery performance

**A**

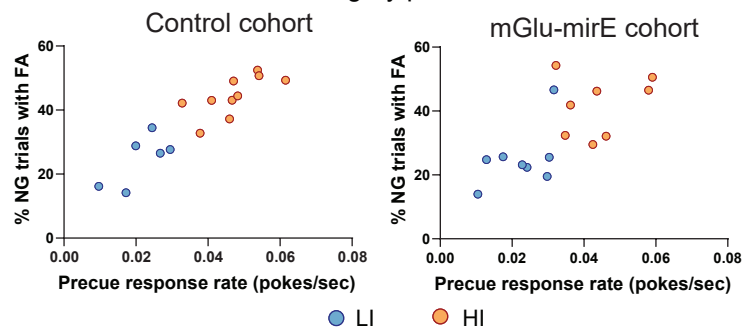

**B**

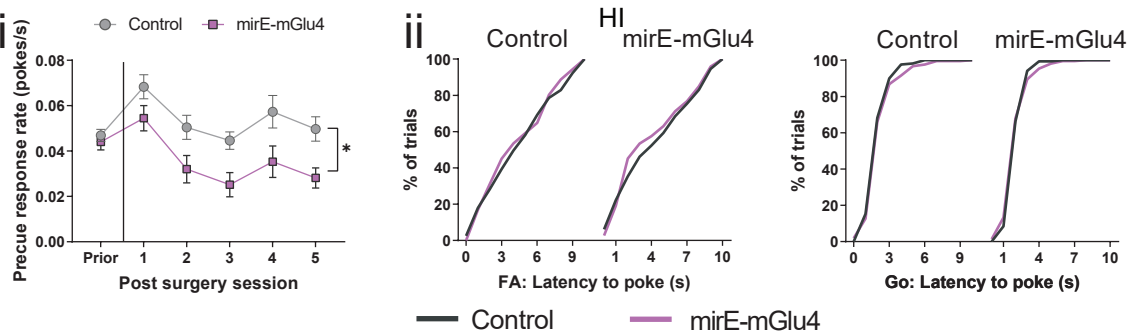

**C**

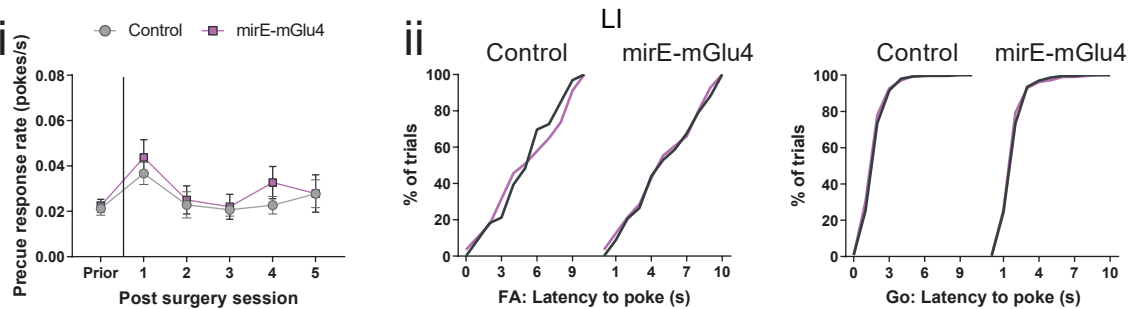

Supplement: supp [file elife-62123-supp-v1.zip]

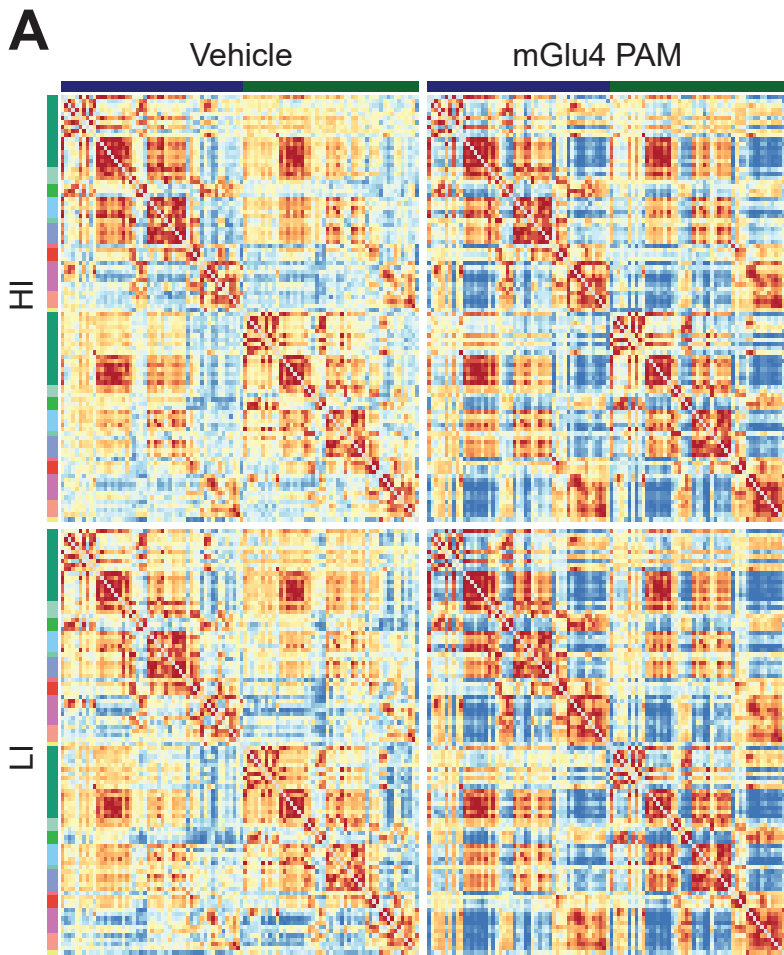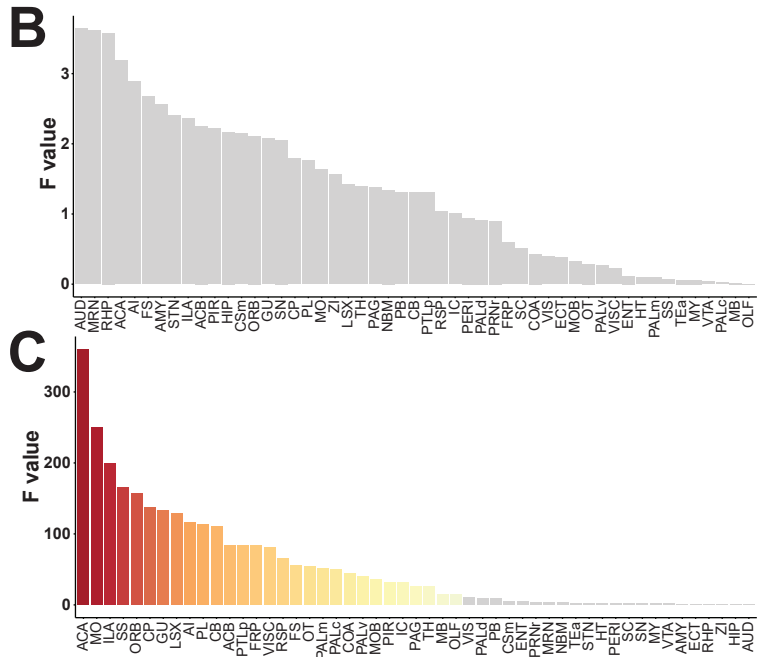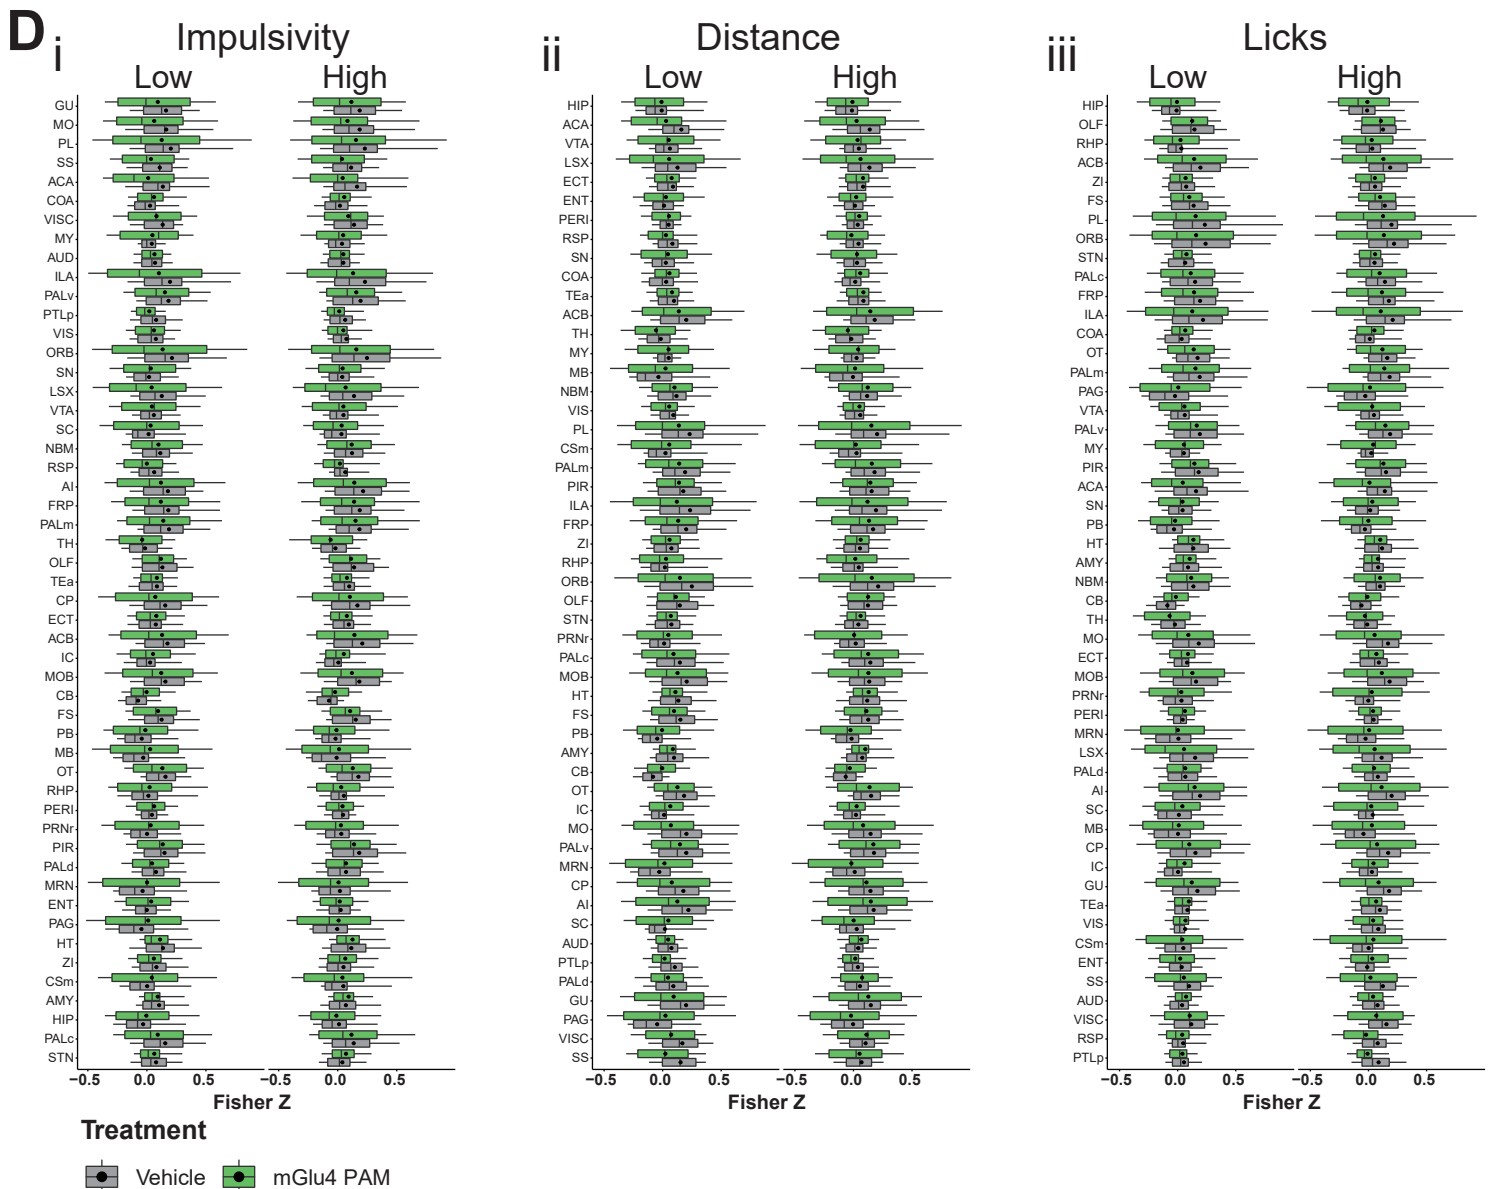

Supplement: supp [file elife-62123-supp-v1.zip]

**A**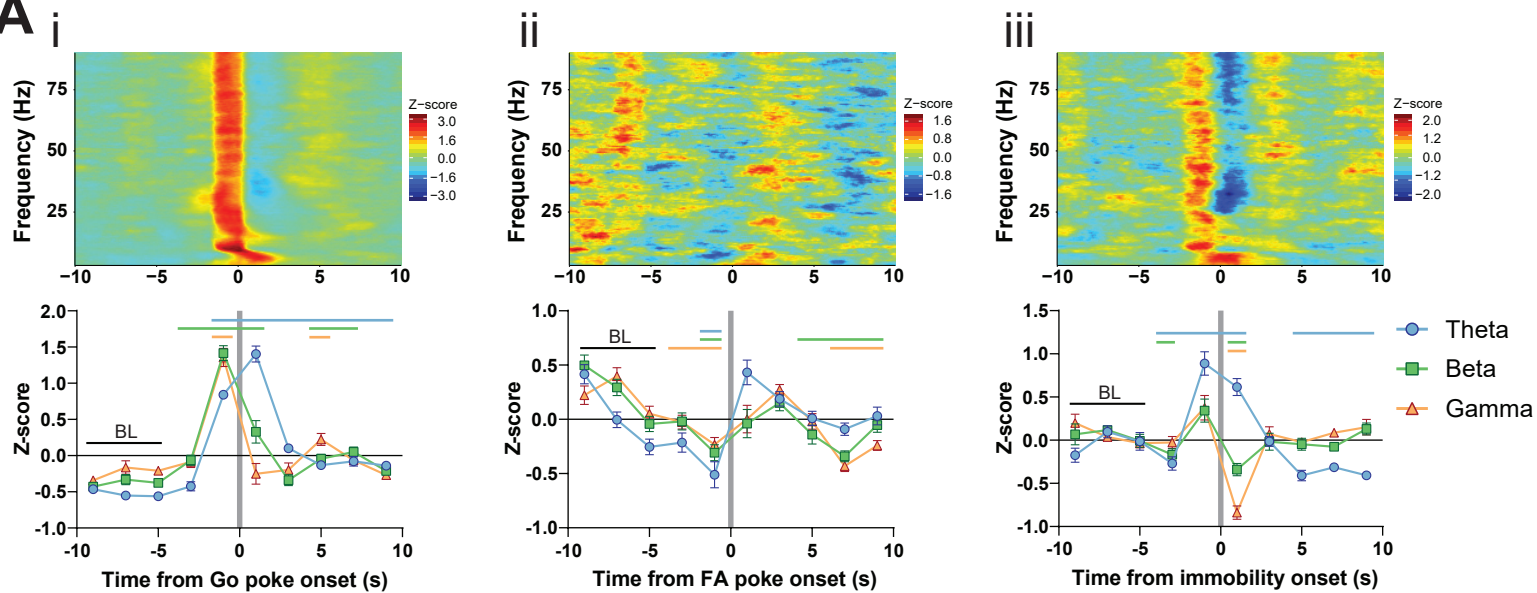**B**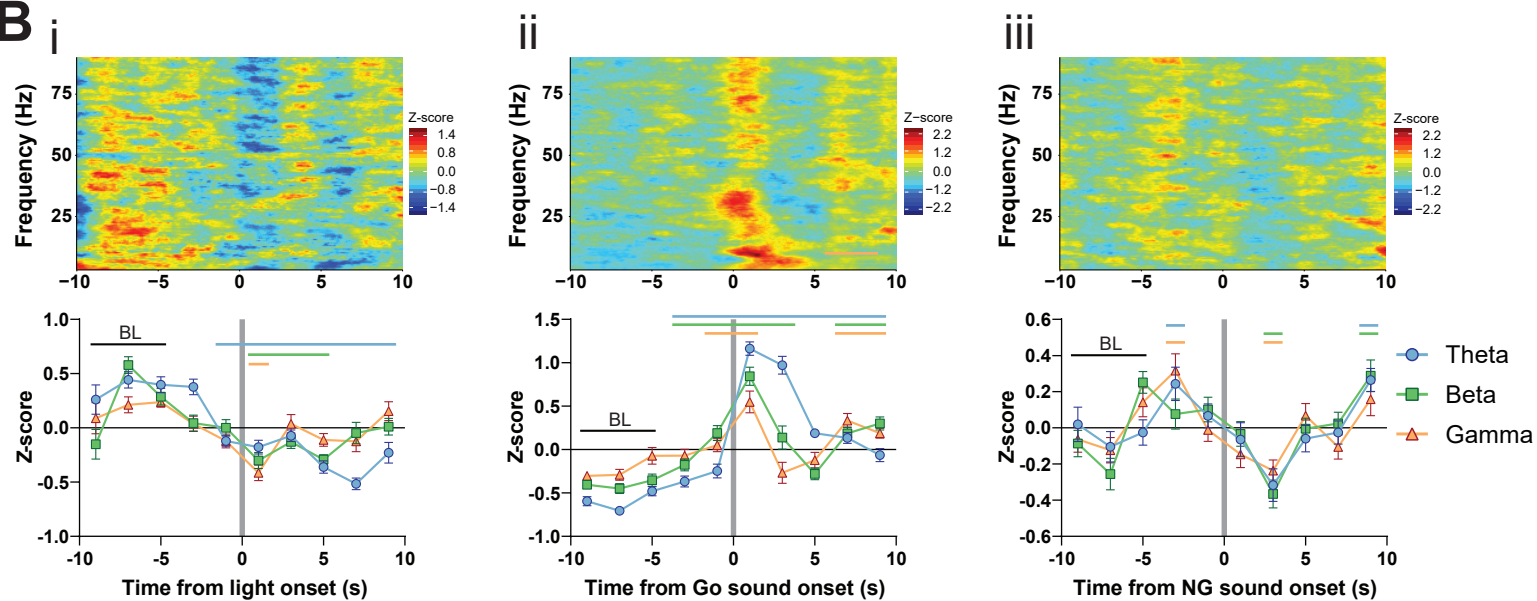

Supplement: supp [file elife-62123-supp-v1.zip]

**A**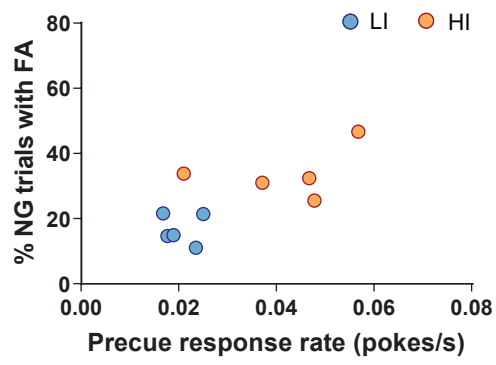**B**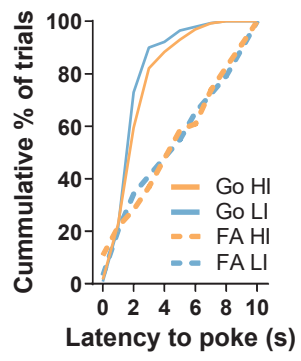**C**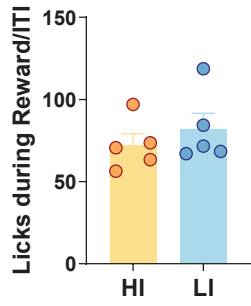**D**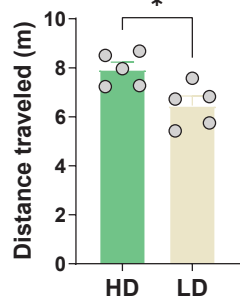**ii**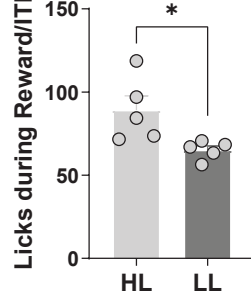

Supplement: supp [file elife-62123-supp-v1.zip]

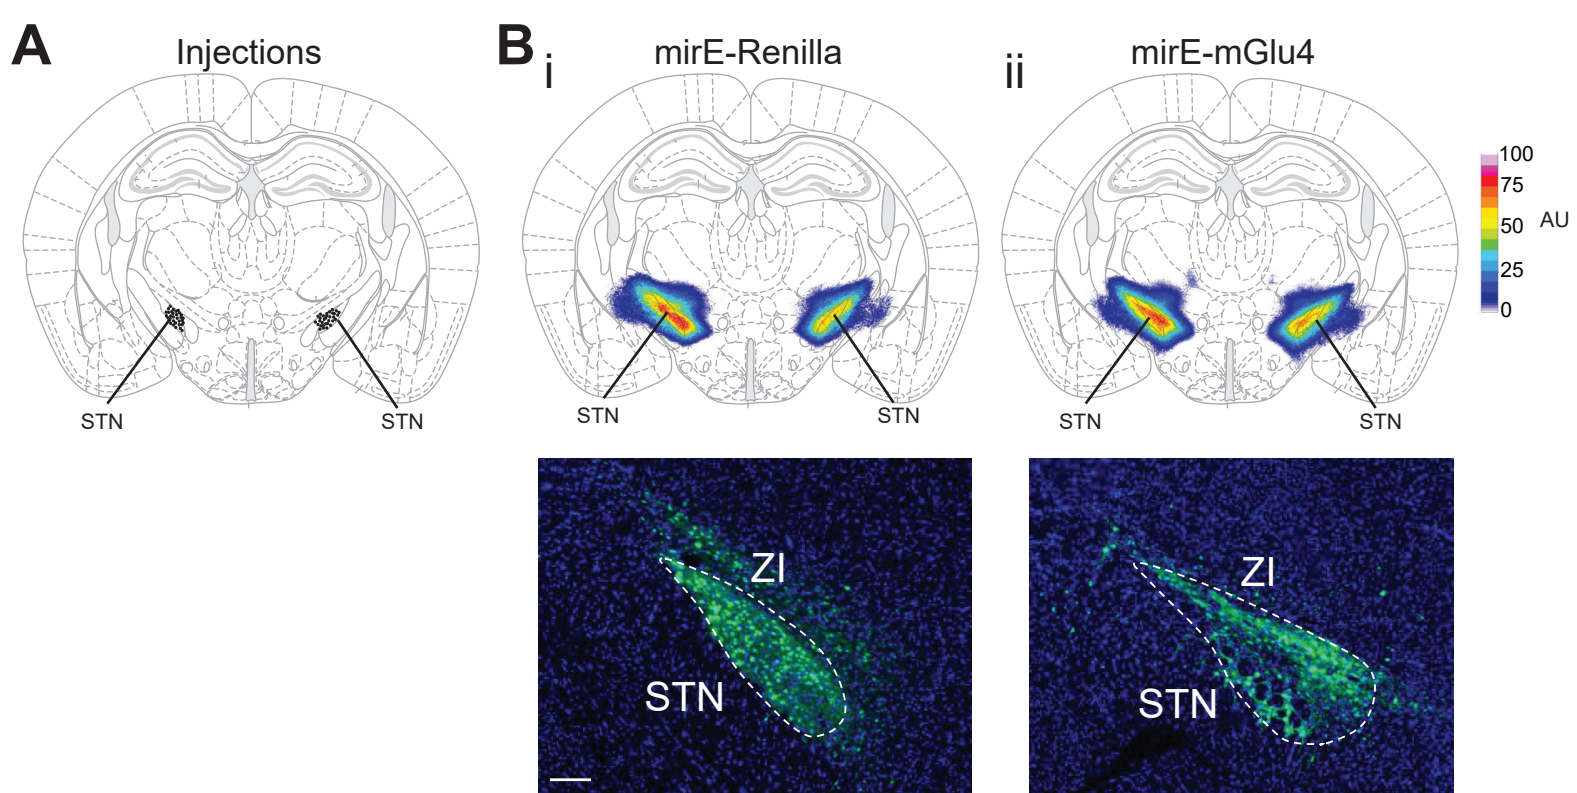

Supplement: supp [file elife-62123-supp-v1.zip]

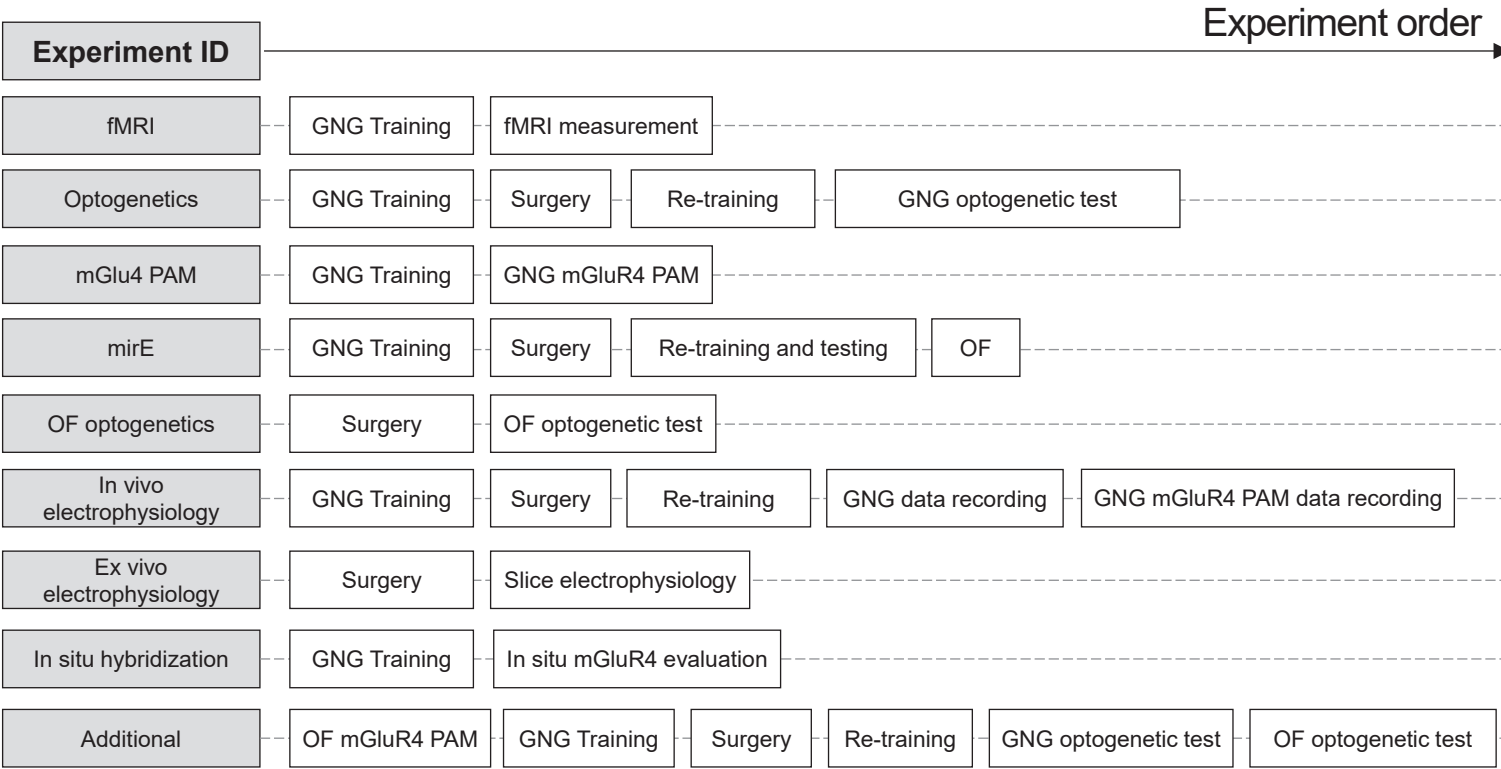

Supplement: supp [file elife-62123-supp-v1.zip]

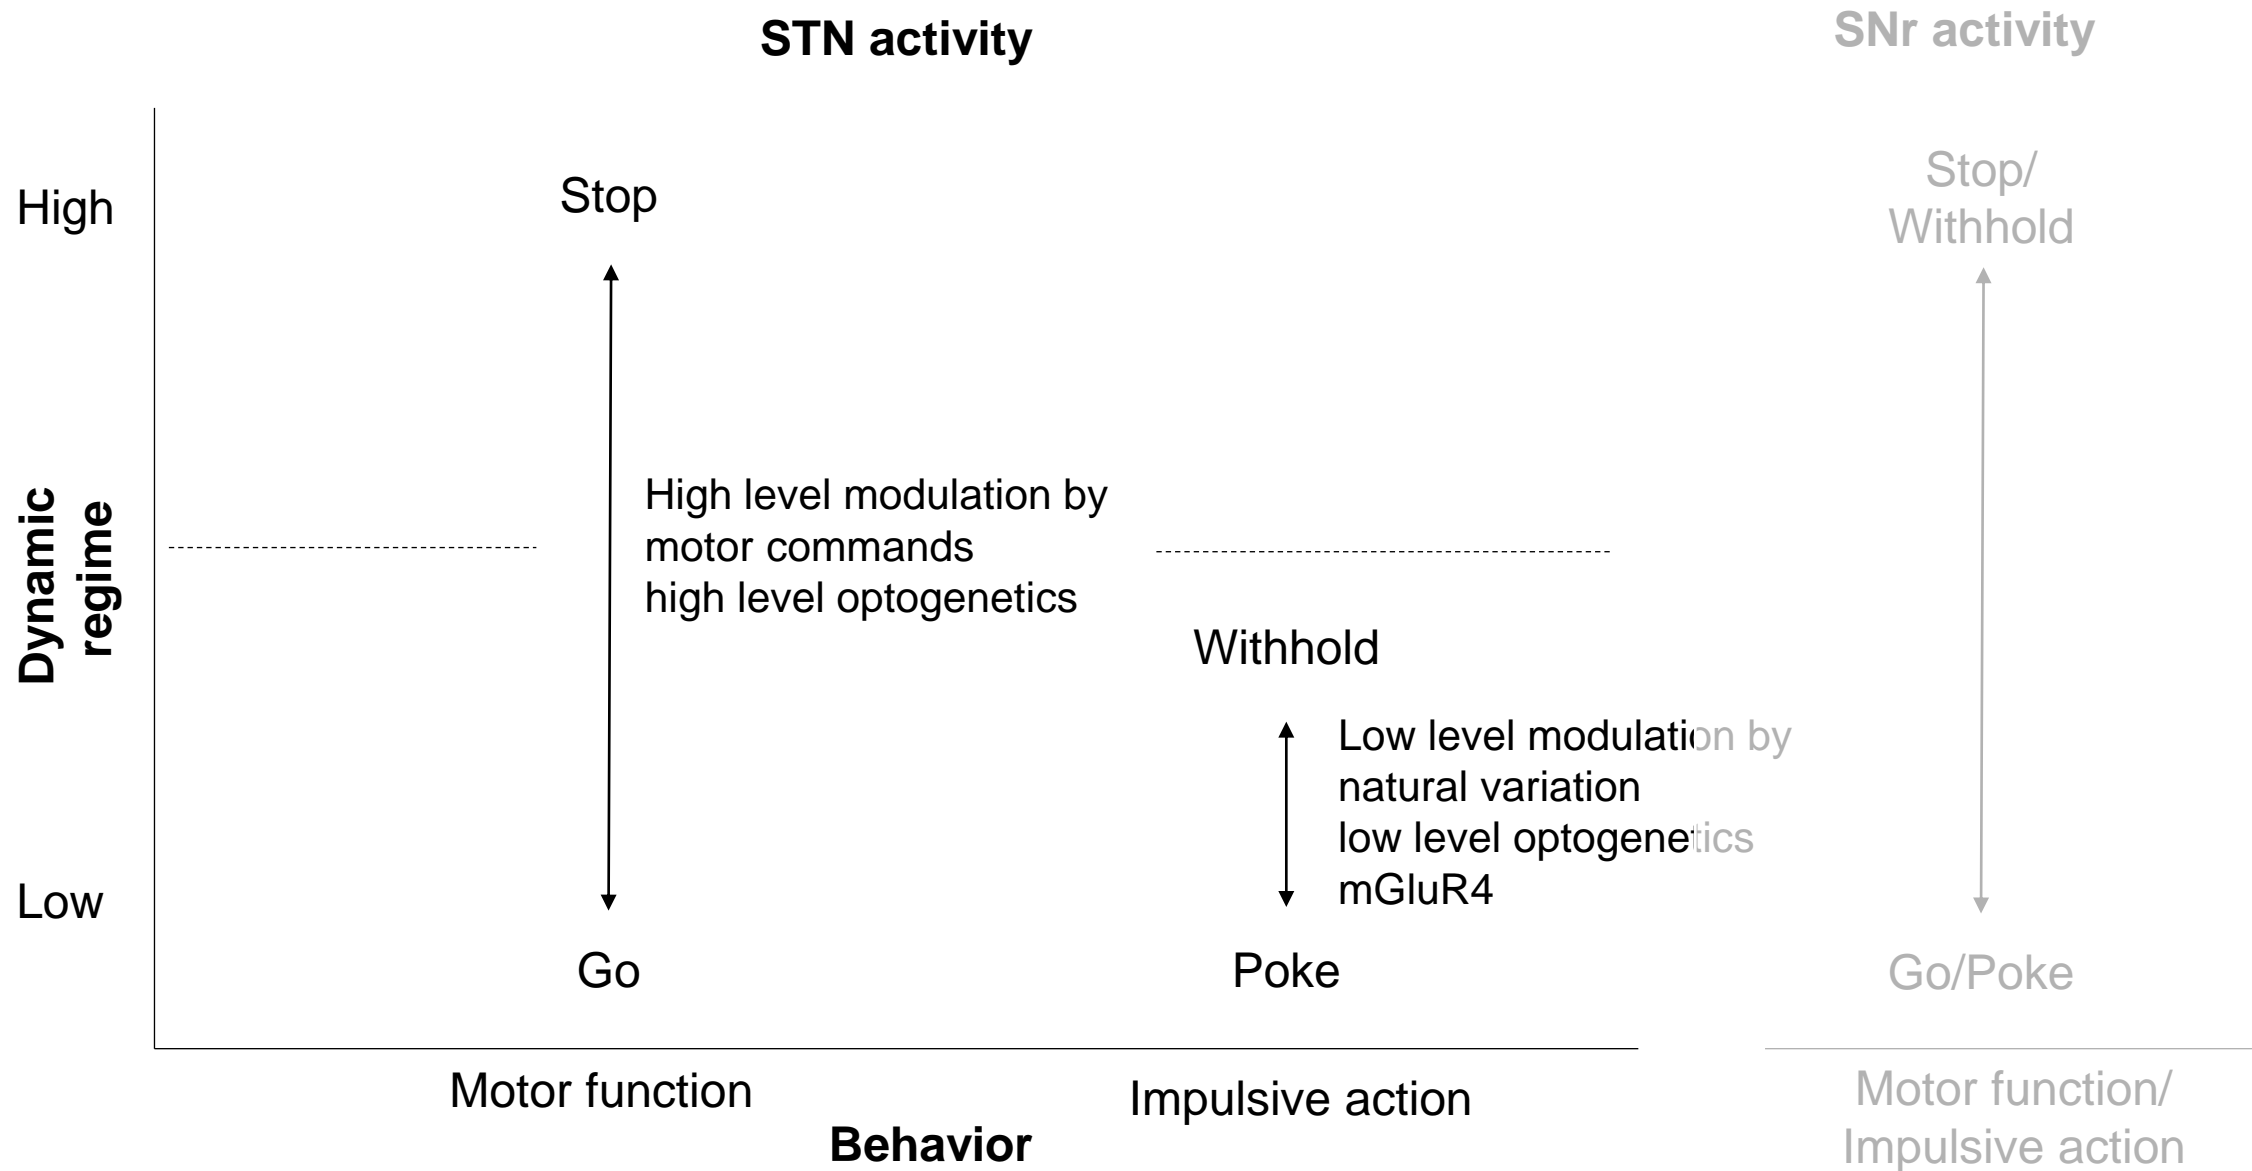

Supplement: supp [file elife-62123-supp-v1.zip]

**A**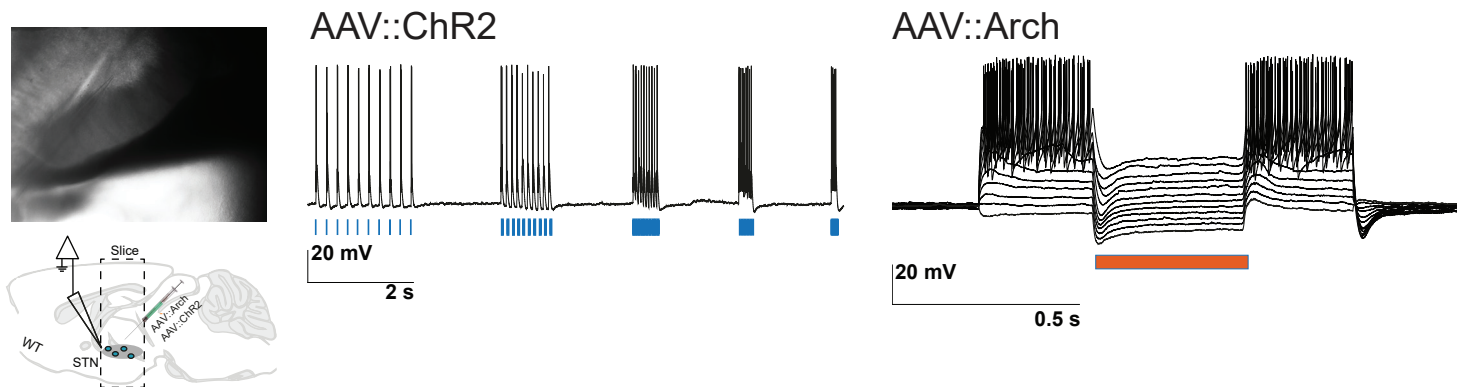**B**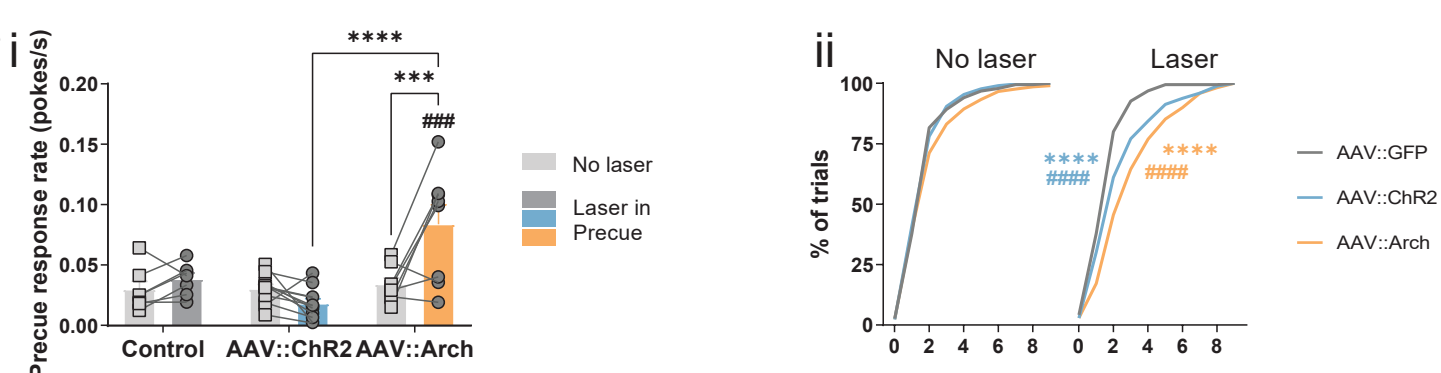**C**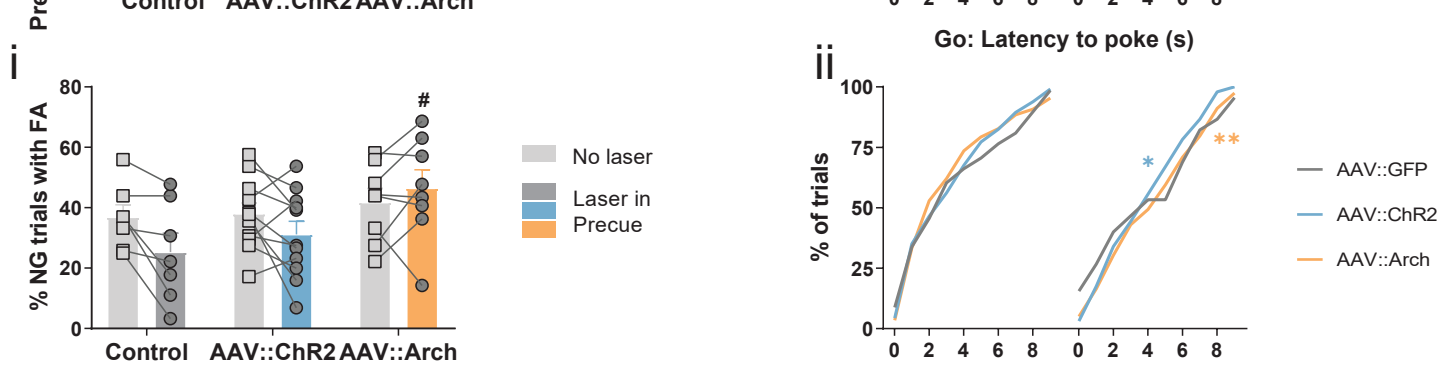**D**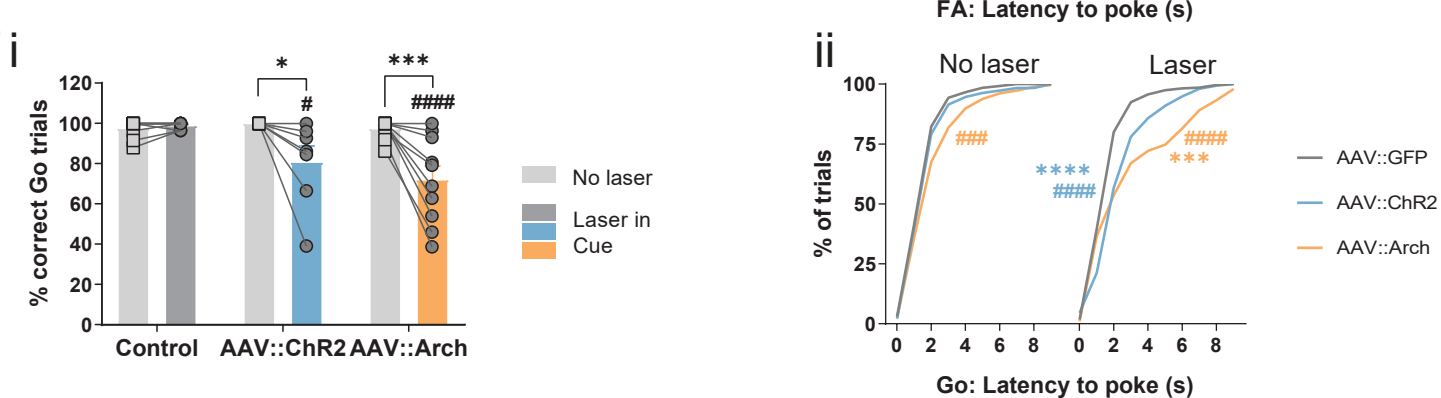**E**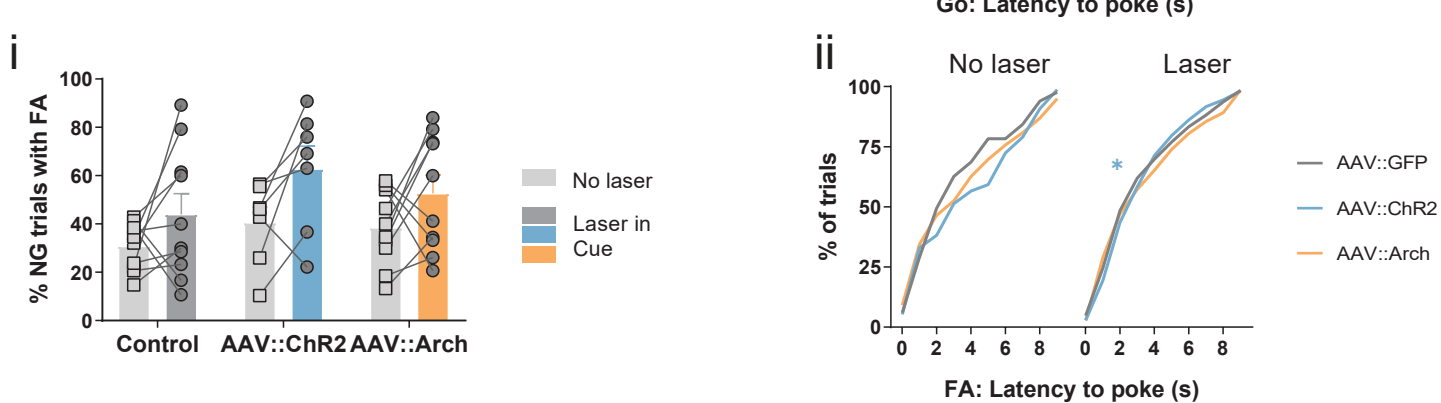

Supplement: supp [file elife-62123-supp-v1.zip]

**A**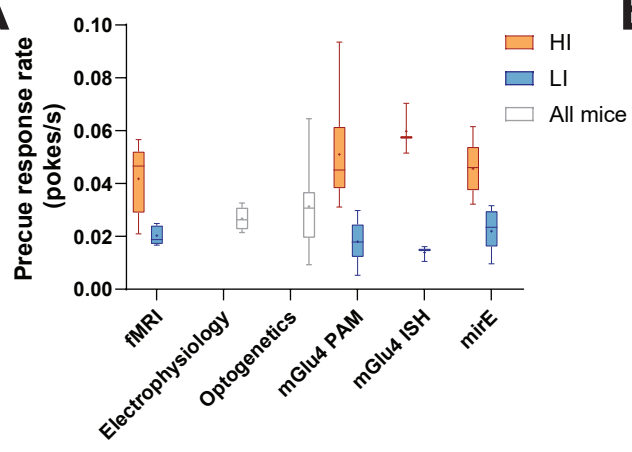**B**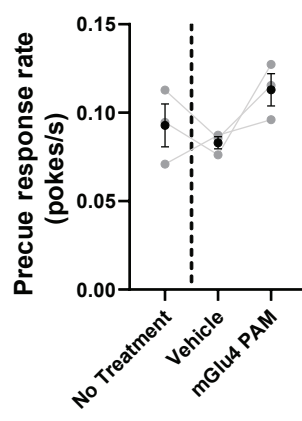

Supplement: supp [file elife-62123-supp-v1.zip]

STN

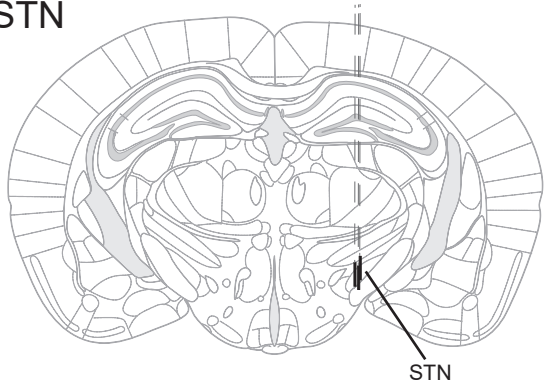

Supplement: supp [file elife-62123-supp-v1.zip]

**A** Zona Incerta (ZI)  
Subthalamic nucleus (STN)  
Amygdala (AMY)

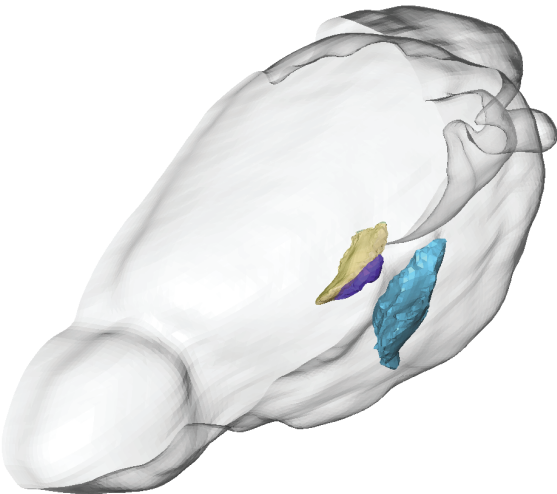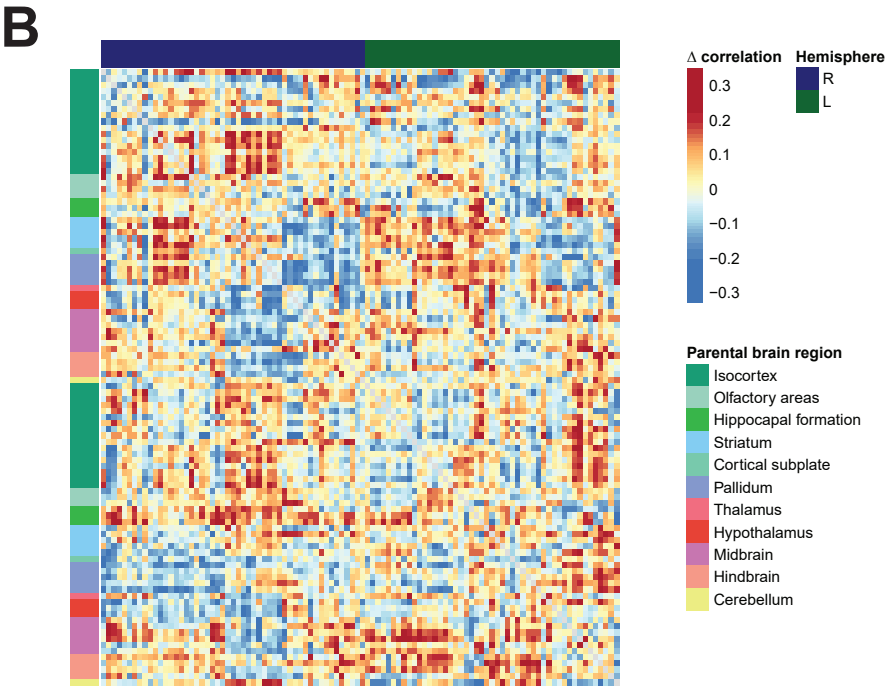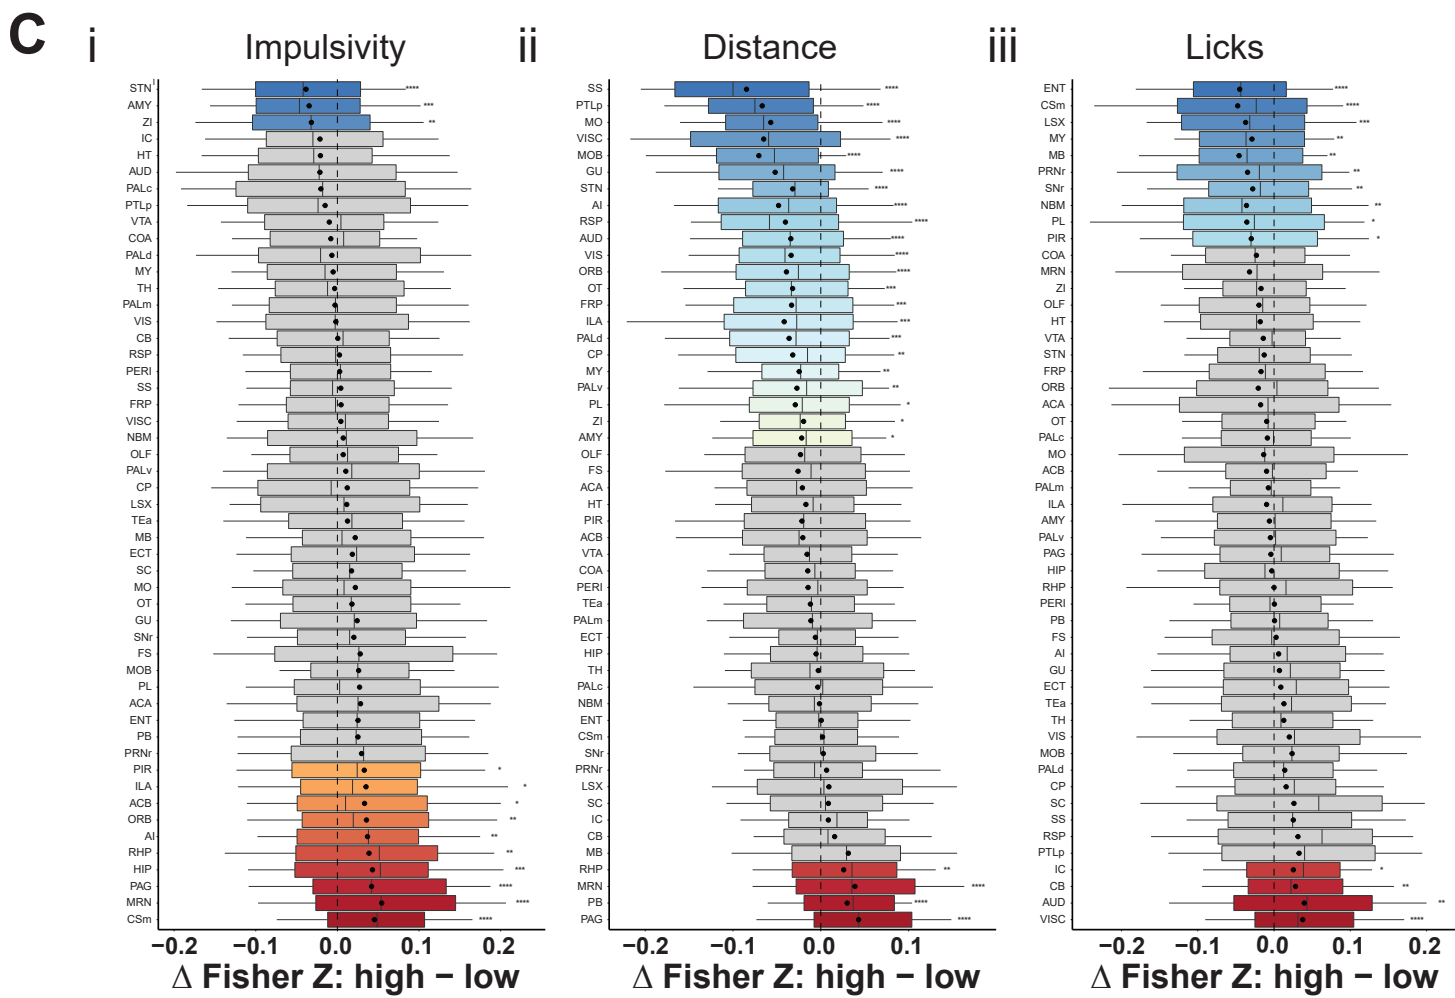

Supplement: supp [file elife-62123-supp-v1.zip]

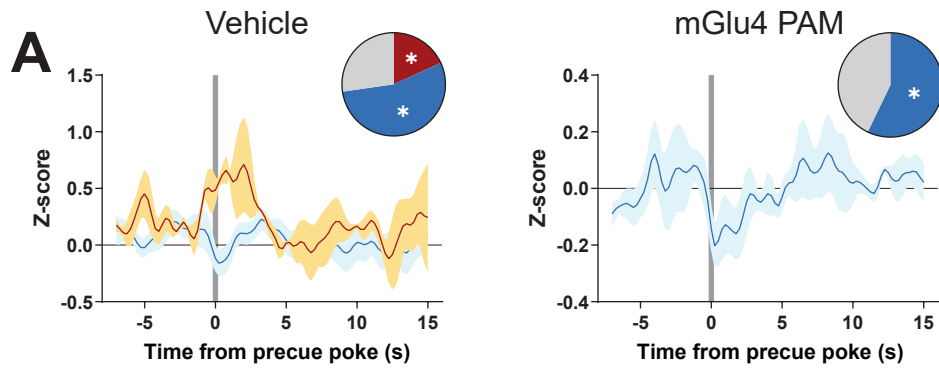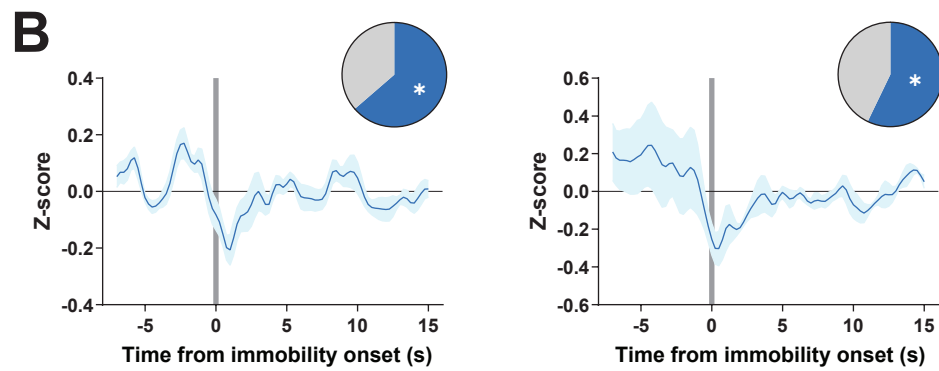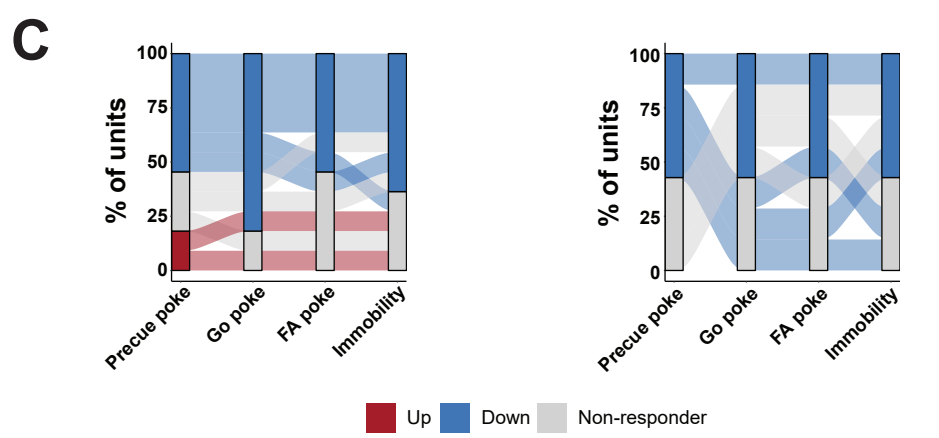

Supplement: supp [file elife-62123-supp-v1.zip]

SNr

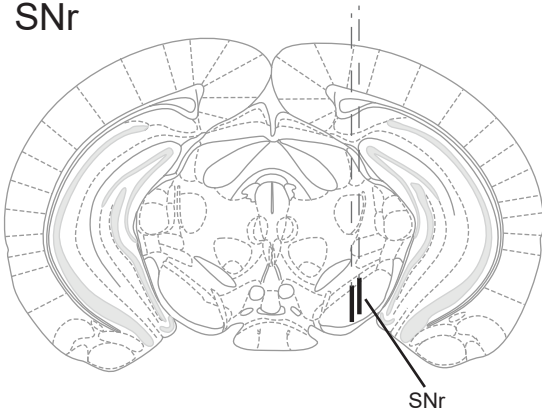

Supplement: supp [file elife-62123-supp-v1.zip]

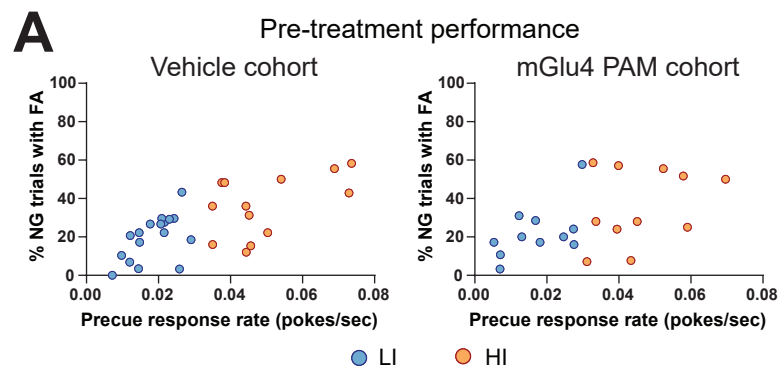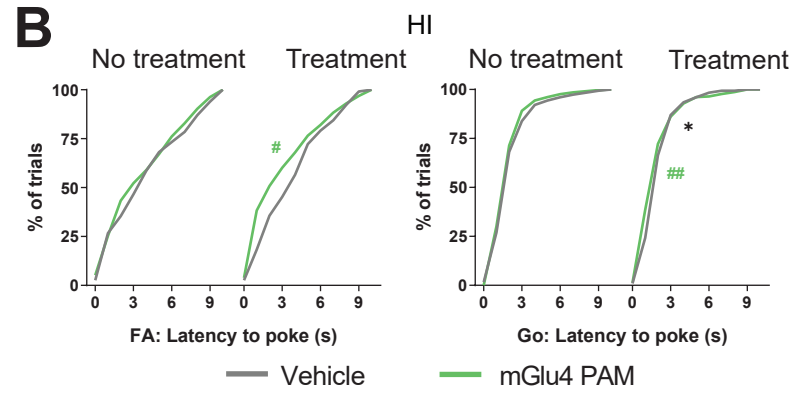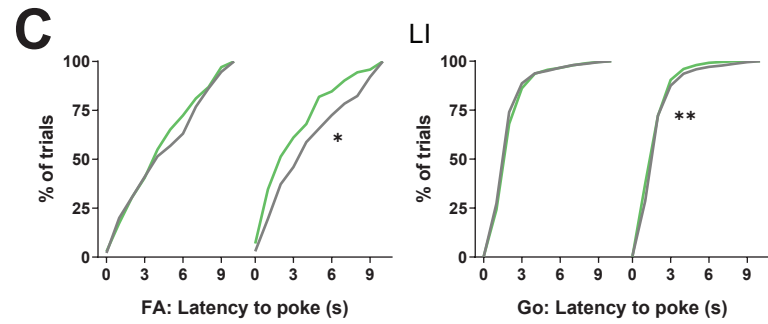

Supplement: supp [file elife-62123-supp-v1.zip]

**A**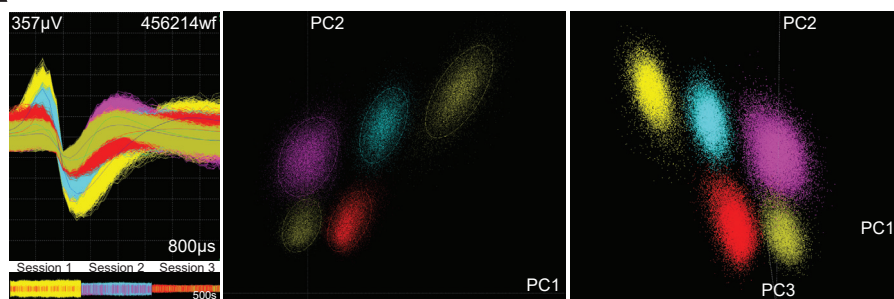**B**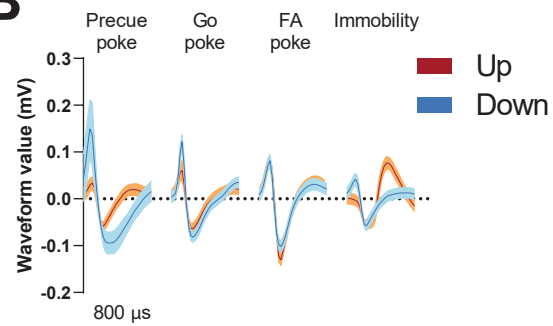**C**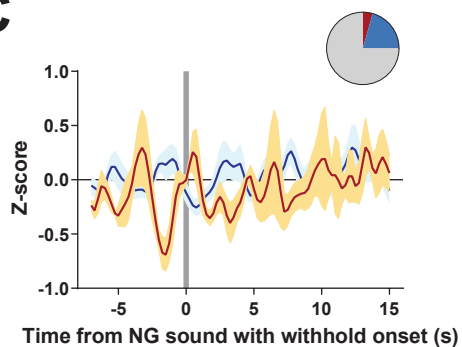**D**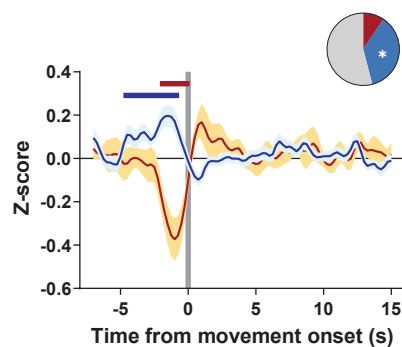**E**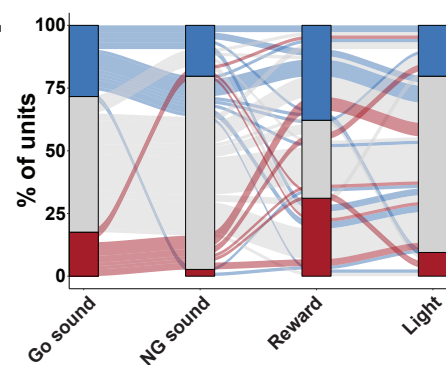**F**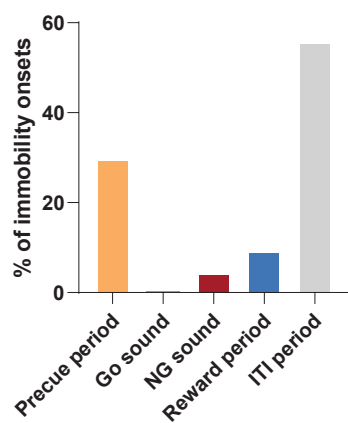**G**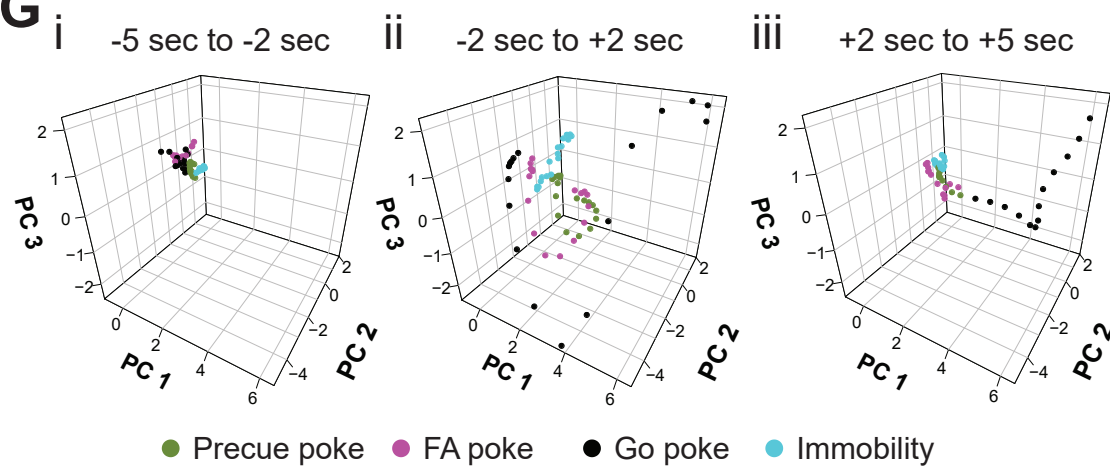

Supplement: supp [file elife-62123-supp-v1.zip]

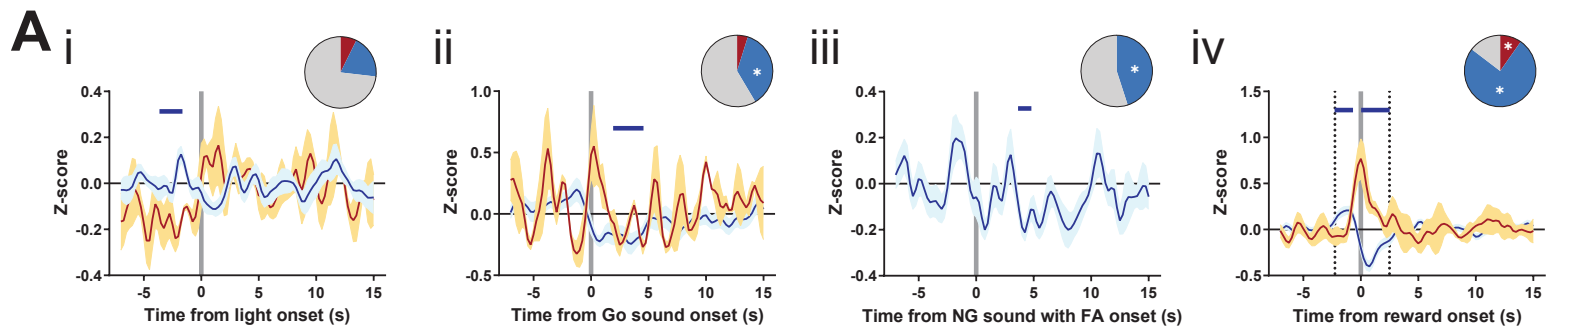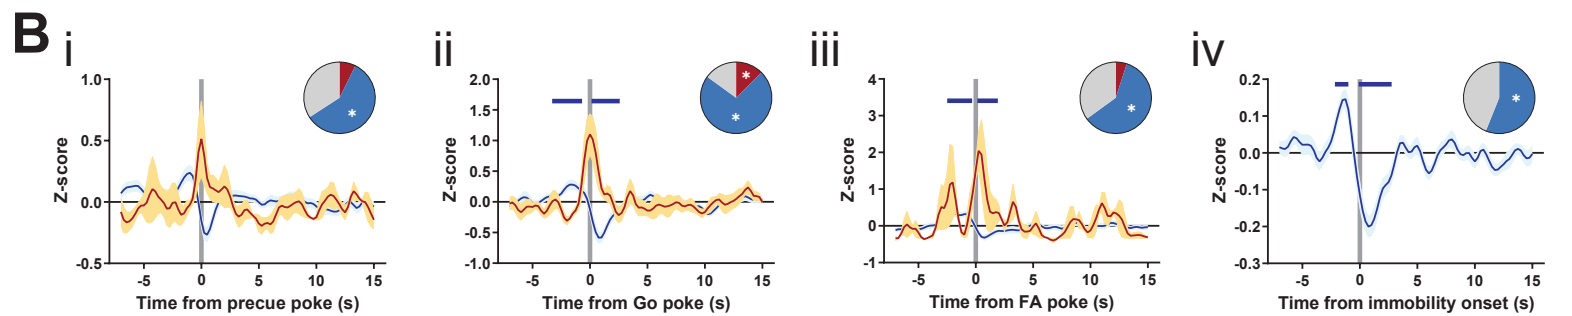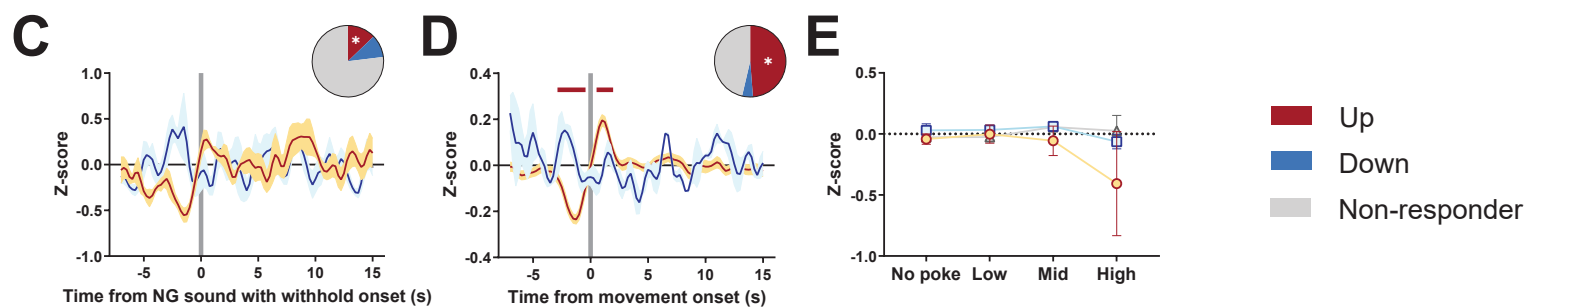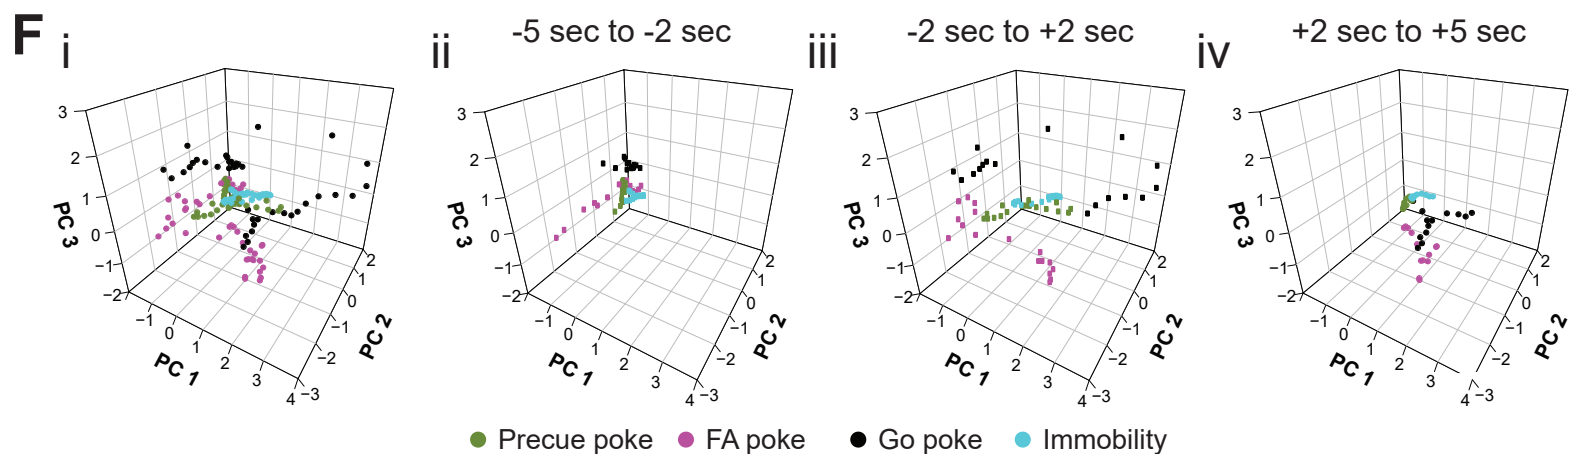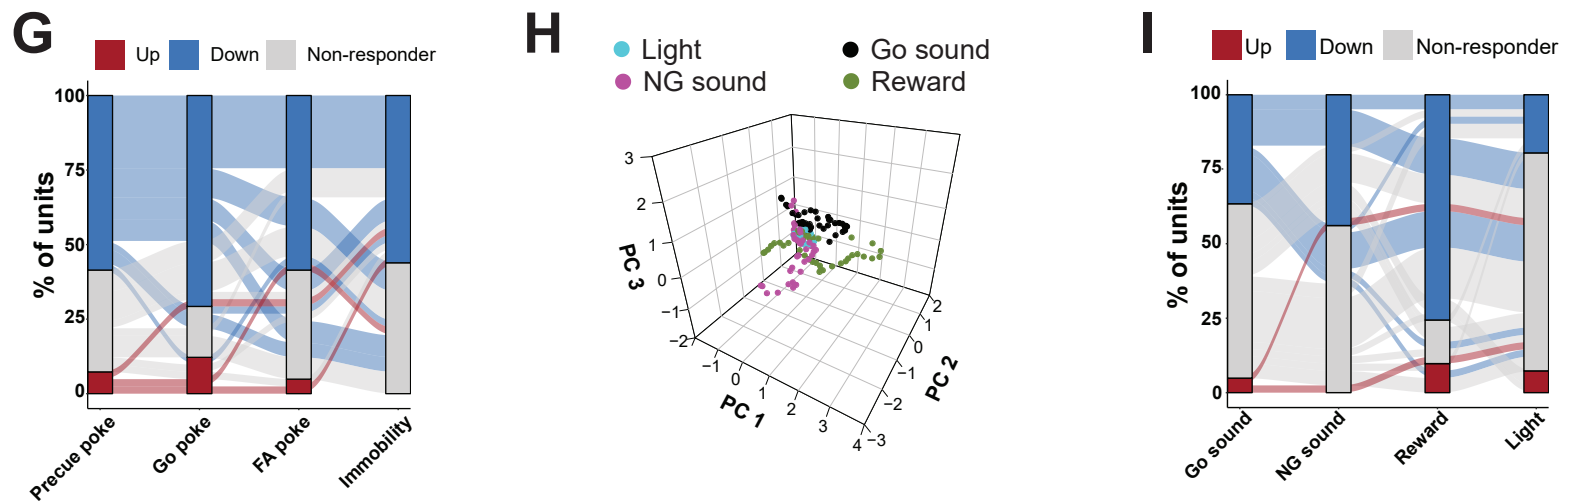

Supplement: supp [file elife-62123-supp-v1.zip]

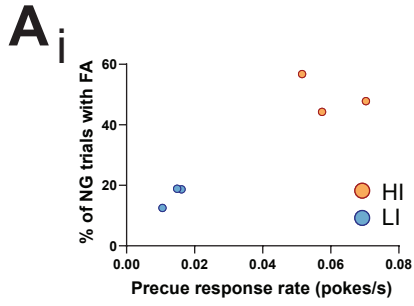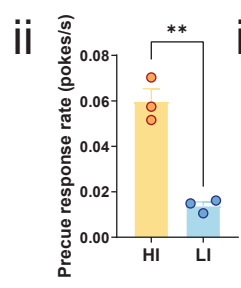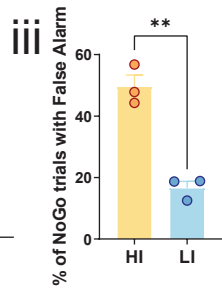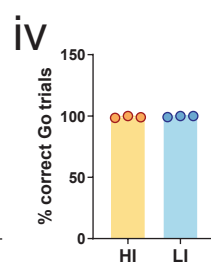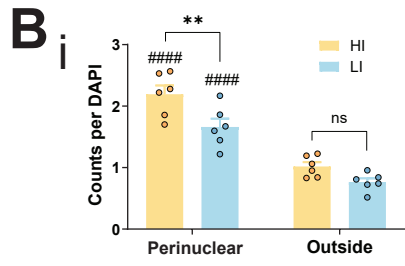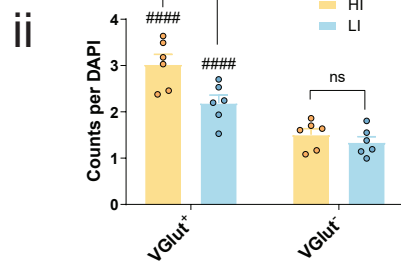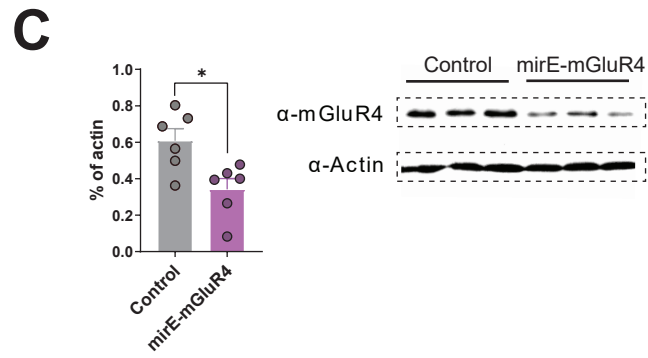

Supplement: supp [file elife-62123-supp-v1.zip]

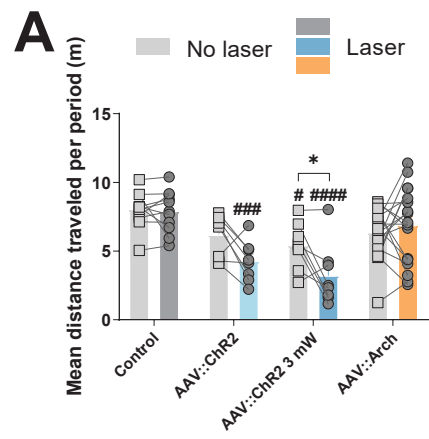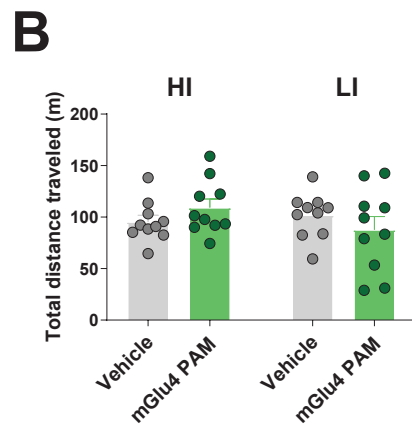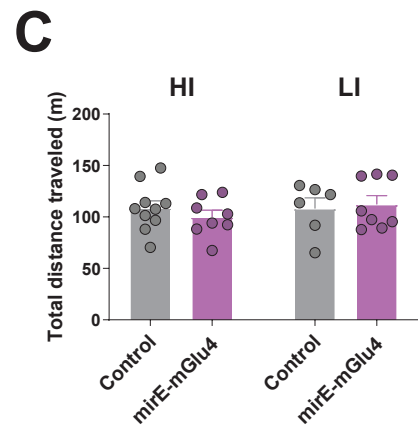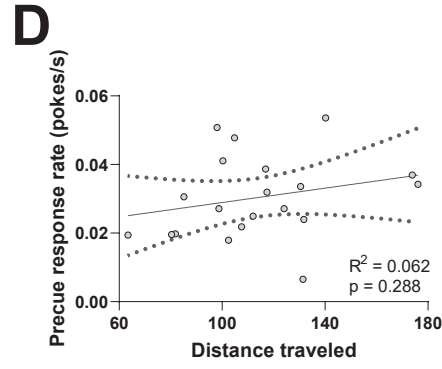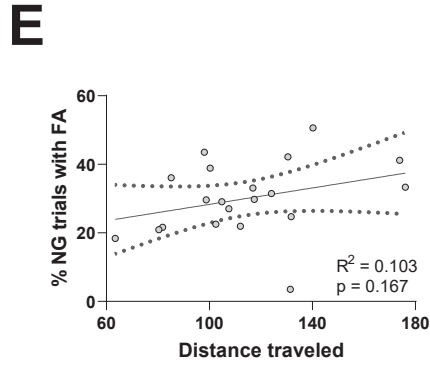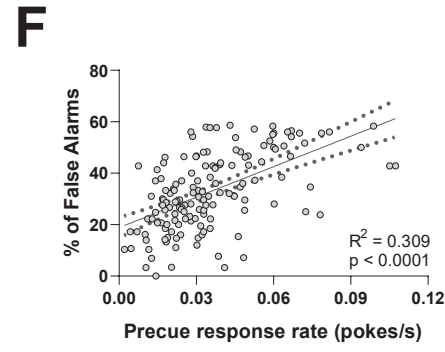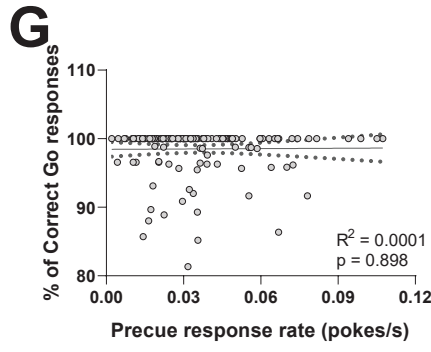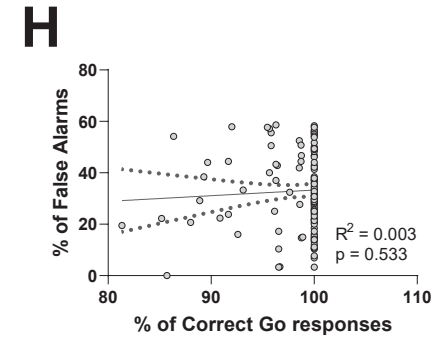

Supplement: supp [file elife-62123-supp-v1.zip]
